# Supplementary material for: Control of plant cell fate transitions by transcriptional and hormonal signals
Source: eLife journal article supplement (doi:10.7554/elife.30135), 2017-10-23
Supplement: supp [file elife-30135-supp-v1.zip]

Archive with 32 entries (32 files):
- elife_poa_e30135_Figure_2_figure_supplement_6.jpg
- elife_poa_e30135_Figure_7_figure_supplement_1.jpg
- elife_poa_e30135_Supplementary_file_2.xlsx
- elife_poa_e30135_Figure_6_figure_supplement_2.jpg
- elife_poa_e30135_Figure_6_source_data_1.xlsx
- elife_poa_e30135_Figure_6_figure_supplement_3.jpg
- elife_poa_e30135_Figure_3_source_data_1.xlsx
- elife_poa_e30135_Figure_2_source_data_2.xlsx
- elife_poa_e30135_Figure_4_figure_supplement_1.jpg
- elife_poa_e30135_Figure_2_figure_supplement_4.jpg
- elife_poa_e30135_Supplementary_file_1.xlsx
- elife_poa_e30135_Figure_10_source_data_1.xlsx
- elife_poa_e30135_Figure_2_figure_supplement_3.jpg
- elife_poa_e30135_Figure_9_figure_supplement_1.jpg
- elife_poa_e30135_Figure_10_figure_supplement_1.jpg
- elife_poa_e30135_Figure_5_source_data_1.xlsx
- elife_poa_e30135_Figure_8_figure_supplement_1.jpg
- elife_poa_e30135_Figure_2_figure_supplement_1.jpg
- elife_poa_e30135_Figure_10_source_data_2.xlsx
- elife_poa_e30135_Figure_9_source_data_1.xlsx
- elife_poa_e30135_Figure_7_figure_supplement_2.jpg
- elife_poa_e30135_Figure_1_source_data_1.xlsx
- elife_poa_e30135_Figure_6_figure_supplement_1.jpg
- elife_poa_e30135_Figure_3_figure_supplement_1.jpg
- elife_poa_e30135_Figure_7_source_data_1.xlsx
- elife_poa_e30135_Figure_5_figure_supplement_1.jpg
- elife_poa_e30135_Supplementary_file_3.pdf
- elife_poa_e30135_Figure_6_source_data_2.xlsx
- elife_poa_e30135_Figure_2_figure_supplement_6.jpg
- elife_poa_e30135_Figure_2_figure_supplement_2.jpg
- elife_poa_e30135_Figure_2_source_data_1.xlsx
- elife_poa_e30135_Figure_4_source_data_1.xlsx
