# Supplementary material for: Control of plant cell fate transitions by transcriptional and hormonal signals
Source: eLife journal article supplement (doi:10.7554/elife.30135), 2017-10-23
Supplement: supp [file elife-30135-supp-v1.zip › elife_poa_e30135_Figure_1_source_data_1.xlsx]

## Sheet: Fig1C
SAM size quantification
Col-0	hec1,2,3
80.5198	76.4271
74.461	70.0972
71.6113	72.3209
77.6633	58.8881
84.0045	72.3638
73.7966	74.2893
74.8158	60.4768
72.2938	68.9876
71.2181	64.7774
81.478	64.1966
77.4554	66.4633
84.1605	73.4644
79.6881	67.3605
83.2181	79.4712
81.2972	71.3514

## Sheet: Fig1D
SAM cell number quantification
Col-0	hec1,2,3
1980	1728
1731	1640
1905	1827
1963	1926
1998	1773
1754	1962
1970	1476
1742	1415
1720	1767
1687	1850
1781	1729
2084	1388
1913	1802
1791	1930
1933	1414
1831	1767
1679	1514
1718	1313
1820	1780
	1747
	1663

## Sheet: Fig1G
Quantification silique number
Col-0								hec1,2,3
Plant #	Day1	Day4	Day7	Day10	Day13	Day16		Plant #	Day1	Day4	Day7	Day10	Day13	Day16
1	0	1	8	15	22	28		9	4	14	22	32	44	53
2	0	3	10	16	21	28		15	7	15	28	37	49	57
3	0	5	11	18	24	31		23	2	10	20	28	36	44
4	0	1	8	15	24	27		26	0	7	15	22	34	43
5	0	5	12	19	27	32		29	0	7	16	25	35	39
6	0	5	10	18	24	34		31	0	4	11	16	26	33
7	0	7	14	20	27	35		32	5	14	21	32	44	53
8	0	7	12	17	23	30		33	1	11	19	32	43	47
9	0	6	14	18	21	27		34	1	8	17	28	40	43
10	0	1	9	15	20	26		36	0	9	19	29	40	51
12	0	3	9	13	22	28		45	1	6	14	23	35	51
13	0	4	10	16	24	30		48	0	5	12	21	31	43
14	0	5	12	20	27	28		50	0	4	10	19	28	37
15	0	3	8	15	21	24		60	1	9	14	22	31	38
16	0	3	10	17	25	32		61	4	11	19	28	41	48
17	0	3	8	14	25	31		63	0	6	14	24	33	42
18	0	3	10	19	25	35		79	0	4	8	13	22	29
19	0	0	4	12	21	30		96	0	8	16	26	32	42
20	0	2	7	13	20	30		98	0	5	13	25	35	42
21	1	7	15	22	26	37		103	3	9	18	26	35	43
22	1	5	11	22	28	36		111	2	9	16	26	38	49
23	0	4	9	17	25	33		114	3	8	15	25	36	48
24	0	1	9	17	24	30		122	0	7	15	23	32	46
25	0	1	7	14	21	27		127	3	9	16	27	37	49
26	0	2	5	13	21	24		132	0	7	17	25	38	43
27	0	5	12	19	27	35		137	3	10	16	30	41	49
28	0	4	11	20	26	36		141	6	14	24	34	45	57
30	0	6	13	21	27	36		143	4	10	18	30	37	44
31	0	4	11	18	23	31		144	3	10	20	29	39	50
32	0	2	7	15	21	27		146	1	9	16	27	39	47
33	0	0	1	5	11	20		147	4	10	18	28	39	47
34	0	6	12	19	27	34		150	3	10	15	26	36	42
35	0	3	11	16	24	30		153	3	11	17	29	38	46
36	0	3	9	16	22	30		154	4	11	17	26	37	42
37	0	5	11	18	23	32		160	6	11	21	31	41	47
38	0	0	7	14	21	27		162	0	0	5	13	20	32
39	0	0	7	15	21	29		170	5	12	23	34	41	51
40	0	4	11	23	29	32		174	0	2	9	19	27	35
41	0	0	4	12	20	26		180	0	7	15	24	35	45
43	0	0	3	8	15	21		181	6	14	21	30	42	52
44	1	7	16	24	31	40		182	5	11	19	27	35	43
45	0	8	18	27	36	39
46	0	9	19	23	34	41
47	0	3	9	19	27	33
48	0	3	9	16	25	34
49	1	7	16	27	35	38

## Sheet: Fig1H
Mean plastochron quantification
Col-0	hec1,2,3
10.6667	7.38462
11.52	7.2
11.0769	8.57143
11.0769	8.37209
10.6667	9.23077
9.93103	10.9091
10.2857	7.5
12.5217	7.82609
13.7143	8.57143
11.52	7.05882
11.52	7.2
11.0769	8.37209
12.5217	9.72973
13.7143	9.72973
9.93103	8.18182
10.2857	8.57143
9	12.4138
9.6	8.57143
10.2857	8.57143
9.6	9
9.29032	7.65957
9.93103	8
9.93103	7.82609
11.0769	7.82609
13.0909	8.37209
9.6	7.82609
9	7.05882
9.6	9
10.6667	7.65957
11.52	7.82609
14.4	8.37209
10.2857	9.23077
10.6667	8.37209
10.6667	9.47368
10.6667	8.78049
10.6667	11.25
9.93103	7.82609
10.2857	10.2857
11.0769	8
13.7143	7.82609
8.72727	9.47368
9.29032
9
9.6
9.29032
9.29032
