# Supplementary material for: Control of plant cell fate transitions by transcriptional and hormonal signals
Source: eLife journal article supplement (doi:10.7554/elife.30135), 2017-10-23
Supplement: supp [file elife-30135-supp-v1.zip › elife_poa_e30135_Figure_2_source_data_1.xlsx]

## Sheet: Fig2C
Intensity plot profiles: pWUS:3xYFP-NLS
	noT											Mock_D1						DEX_D1							Mock_D2							DEX_D2							Mock_D3							DEX_D3
Distance	#1	#2	#3	#4	#5	#6	#7	#8	#9		Distance	#1	#2	#3	#4		Distance	#1	#2	#3	#4	#5		Distance	#1	#2	#3	#4	#5		Distance	#1	#2	#3	#4	#5		Distance	#1	#2	#3	#4	#5		Distance	#1	#2	#3	#4
0	0	4.5	1	0	1	4	3	1	9		0	0	0	1	9		0	3	1	1	3	1		0	12	3.5	1	0	2		0	8	21.5	1	17.5	1		0	3	1	2	11	83		0	17.5	2	2	18
0.331012	0	4	1	0	1	4	3	1	10		0.331012	0	0	1	10		0.331012	3	0	1.49658	3	1		0.331012	13	3.49658	1	0	2		0.331012	8.49658	23.5034	1	18	1		0.331012	2.50342	2	2	8.99315	87.9931		0.331012	19	1.50342	2	20.4966
0.662024	0	3	1	0.493151	1	4	3	1	11		0.662024	0	0	1	10.5068		0.662024	2	0	2	3	1		0.662024	14	3	1	0	2		0.662024	9	25.5068	1	18.4932	1		0.662024	2	2	2	7.49315	91.9863		0.662024	21	1.50685	3	23.4932
0.993036	0	3	1	1	1.48973	4	4	1	12		0.993036	0	0	1	11		0.993036	2	0	2	3	1		0.993036	15	3	1	0	3		0.993036	9	27	1	19	1		0.993036	2	2.48973	2.51027	6.48973	92.9795		0.993036	23	1.51027	3	25.4897
1.32405	0	3	1	1	2	4	4	1	13.5137		1.32405	0	0	1	12		1.32405	2	0	2	4	1		1.32405	16.4863	3	1	0	3		1.32405	10	29	1	19.4863	1		1.32405	2	3	3	5.4863	91.4589		1.32405	25	2	3	28
1.65506	0	2.48288	0	1	2	4	4	1	15.5171		1.65506	0	0	1	12.5171		1.65506	2	0	2	4	1		1.65506	17.4829	3	1	0	3		1.65506	10	30.4829	1.48288	20	1		1.65506	2	4	3	4.48288	86.9658		1.65506	27	2	4	30
1.98607	0	2.47945	0	1	2	4	5	1	17.5205		1.98607	0	0	1	13.5205		1.98607	1	0	2	4	0		1.98607	18.9589	3	1	0	3		1.98607	10	32.4795	2	21	1		1.98607	1.52055	4	3	4	80.9589		1.98607	28.4795	2	4	31
2.31708	0	2	0	1	2	4	5	1	19.524		2.31708	0	0	1	14.524		2.31708	1	0	2	5	0		2.31708	20.9521	3	1	0	3.52397		2.31708	11	33.9521	2.47603	22.476	1		2.31708	1.52397	5	3	4	73.476		2.31708	30	2	4	32
2.6481	0	2	0	1	3	3.4726	5.5274	1	22.0548		2.6481	0	0	1	15.5274		2.6481	1	0	2	5	0		2.6481	22.9452	3.5274	1	0	4		2.6481	11	34.9452	3.4726	24	1		2.6481	1.5274	5	3	4	64.4726		2.6481	31.5274	2	4	32.5274
2.97911	0	2	0	1	3	3.46918	5.53082	1	24.0616		2.97911	1	0	1	16.5308		2.97911	1	0	2	6	0		2.97911	25.4075	3.53082	1	0	4		2.97911	12	35.9384	5	26	1		2.97911	1.53082	6	3	4	54.9384		2.97911	33	2	4	32.5308
3.31012	0	2	0	1	3	4	6	1.53425	26.5342		3.31012	1	0	0	17.0685		3.31012	1	0	2	6.53425	0		3.31012	28.3973	4	0.465753	0	4		3.31012	13	36.3973	6	29	1		3.31012	1	6	3	4	45.4658		3.31012	34	2	4	32
3.64113	0	2	0	1	4	4	6	2	28.0753		3.64113	1	0	0.462329	18.0753		3.64113	1	0	1.46233	7.53767	0		3.64113	31.387	4.53767	0	0	3.53767		3.64113	14	35.9247	8	31.4623	1		3.64113	1	6	3	4.46233	36.4623		3.64113	35.5377	2.46233	4	31.5377
3.97214	0	2	0	1	5	4	6.5411	2	30.0822		3.97214	1	0	1	19.0822		3.97214	1	0	1.4589	8.5411	0		3.97214	34.8356	5	0	0	3.5411		3.97214	15	35.3767	11	34.4589	1.4589		3.97214	1	7	3	4.4589	28.4589		3.97214	37.5411	2.4589	3.4589	30.5411
4.30316	0	2	0	1	5	4	6.54452	2	30.6336		4.30316	1	0.544521	1	19.089		4.30316	1	1	1.45548	9.54452	0		4.30316	37.8219	5.54452	0	1	3.54452		4.30316	16	34.3664	14.5445	36.911	1.45548		4.30316	1	7	3	4.45548	22		4.30316	40.089	2.45548	3	29.5445
4.63417	0	2	0	1	6	4	7	2	31.0959		4.63417	1	1	1	19.0959		4.63417	1	1	1.45205	11	0		4.63417	41.2603	6.54795	0	1	3		4.63417	18	32.9041	18.5479	38.9041	2		4.63417	1	8	3	4.45205	16		4.63417	43.0959	2	3	28
4.96518	1	2	0	1	7	4	7	2	30.1027		4.96518	1	1	1	18.6541		4.96518	1	1	1.44863	12.5514	0		4.96518	43.6918	8.55137	0	1	3		4.96518	19	31.4486	23.1027	41.3459	2.44863		4.96518	1	8	3	4.44863	12		4.96518	46.1027	2	3.44863	26.5514
5.29619	1	2.55479	0	1	7	4.44521	7	2.55479	29.1096		5.29619	1	1	1	18.1096		5.29619	1	1	1.44521	14.5548	0		5.29619	45.6712	9.55479	0	1	2.55479		5.29619	20	30.4452	27.6644	43.7808	3		5.29619	0.554795	8.44521	3	4	8		5.29619	49.6644	2	3.44521	25.5548
5.6272	1	3	0	1	8	4.44178	7	3	27.5582		5.6272	1	1	1	17.1164		5.6272	1	1	2	16.1164	0		5.6272	47.2089	11.5582	0	1	2		5.6272	20	29	33.2329	45.7671	3.44178		5.6272	0.558219	9	3.55822	4	6		5.6272	52.2329	2	4	24.5582
5.95822	1	4	0	1.43836	8	5	7	3	25.5616		5.95822	1	1	2	15.5616		5.95822	1	1	2	18.1233	0		5.95822	47.6301	13.5616	0	1	2		5.95822	21	27.5616	38.8082	47.1918	4.43836		5.95822	1	9.43836	4	3.43836	4		5.95822	54.6849	2	4	23.5616
6.28923	2	5.13014	0	1.43493	8	5	7	3	23.5651		6.28923	1	1	2.43493	14.1301		6.28923	1	1	2	20.1301	0		6.28923	47.1747	16.1301	0	1	2		6.28923	20.4349	26.5651	43.8253	48.1747	5.43493		6.28923	1	9.43493	4.56507	3.43493	3		6.28923	56.2603	2	4.43493	22.5651
6.62024	2	6.56849	0	1.43151	8.56849	6	7	3.56849	21.5685		6.62024	1	1	3.43151	13.137		6.62024	1	1	2	23.137	0		6.62024	46.1575	18.137	0	2	1.56849		6.62024	20	26.137	48.411	48.589	6.43151		6.62024	1	9.43151	4.56849	3	2		6.62024	57.274	2	5.43151	21.5685
6.95125	2.42808	8.14384	0	1.42808	8.57192	6	7	4	19.5719		6.95125	1	1	5	11.5719		6.95125	1	1	3	25.1438	0		6.95125	44.7123	20.7158	0	2	1		6.95125	19.4281	25.1438	52.5753	48.5685	8.42808		6.95125	1	10.4281	5.57192	3	2		6.95125	56.2877	2	6.42808	20.5719
7.28226	3	9.72603	0	1.42466	8.57534	6	7	4	18		7.28226	1	1	6.42466	10.5753		7.28226	1	1	3	27.1507	0		7.28226	42.6986	22.726	0	3	1		7.28226	18.4247	25.726	55.6027	47.5479	10.4247		7.28226	1	10.4247	5.57534	3	2		7.28226	54.3014	2	7.42466	20.5753
7.61327	3.42123	11.7363	0	2	9	7	7	4.57877	17		7.61327	1	1	8.42123	9.57877		7.61327	1	1	4	29.7363	0.578767		7.61327	40.8425	25.3151	0	4	1		7.61327	17.4212	25.7363	56.6301	46.5274	13.4212		7.61327	1	10.4212	6.15753	3	2		7.61327	52.3151	2	9	20.1575
7.94429	4	14.3288	0	2	9	7	7	5	16		7.94429	1	1	11.4178	9		7.94429	1	1.41781	4	31.1644	1		7.94429	38.8356	27.3288	0	5	1		7.94429	16.4178	26.3288	56.2397	45.089	17		7.94429	2	10.4178	6.58219	3	3		7.94429	49.3288	2	10.4178	20.1644
8.2753	4.41438	16.3425	0	2	9.58562	7	7	5	15		8.2753	2	1	14.4144	8.58562		8.2753	1.41438	2	5	32.7569	1		8.2753	36.8288	29.3425	0	6	1		8.2753	15	26.9281	54.2705	42.6575	21.4144		8.2753	2	10.8288	6.58562	3	3.58562		8.2753	46.7569	2	12.4144	20.1712
8.60631	5	17.9452	1	2	9.58904	7.58904	7	5.58904	14.411		8.60631	2	1	19.411	8.58904		8.60631	1.41096	2	5	33.7671	1		8.60631	35.411	30.3562	0	7.58904	1		8.60631	14	27.9452	51.7123	40.2329	27.411		8.60631	3	11.8219	6.58904	3	4.58904		8.60631	43.7671	2	14.411	20.1781
8.93732	5.40753	19.9623	1	2	10.5925	8	7	5.59247	14.4075		8.93732	2.59247	1	23.8151	8.59247		8.93732	2	2	5	34.1849	1		8.93732	33	31.3699	0	9.59247	1		8.93732	13	28.9623	47.1473	37.2226	35		8.93732	3	12.8151	6.59247	3	5.59247		8.93732	41.7774	2	16.4075	20.1849
9.26833	5.40411	21.5753	1	2	10.5959	8	7.59589	6	14.4041		9.26833	3	1	29.4041	8.59589		9.26833	2	3	6	34.1918	1		9.26833	32	31.9795	0	11.5959	1		9.26833	12.4041	30.5753	42.1712	34.8082	43.4041		9.26833	4	14.4041	6.19178	3.59589	6.59589		9.26833	40.1918	2	18.4041	20.1918
9.59935	6	23.5959	1.59932	2	11.1986	8	8	6	14.4007		9.59935	3.59932	1	35.4007	9.59931		9.59935	2	3	6	33.1986	1		9.59935	30	31.3973	0	13.5993	1		9.59935	11.4007	31.9966	36.5959	32.4007	53.4007		9.59935	4.59932	16.8014	5.59932	4	8.59931		9.59935	39.1986	2	20.8014	19.7979
9.93036	6.39726	25.2192	2	2	11.6027	8	8.60274	7	14.3973		9.93036	3.60274	2	41.7945	10		9.93036	2	4	6	31.6027	1.60274		9.93036	28	30.411	0	15.6027	1.60274		9.93036	11.3973	33.6164	31.0137	30	64.3973		9.93036	5	19.3973	5.60274	4	9.60274		9.93036	39.2055	2	22.7945	19.2055
10.2614	7	26.637	2.60616	2	12.2123	8	9	7	15.3938		10.2614	4.60616	2	47.7877	11.6062		10.2614	2.39384	5	6	30.2123	2		10.2614	26	29.4247	0	17.6062	2		10.2614	11.3938	36.2431	25.4247	28	76.3938		10.2614	6	22.7877	5	4	11.6062		10.2614	40.2123	3	25.7877	18.2123
10.5924	7.39041	28.2671	3	2	12.6096	8	10	7	15.3904		10.5924	4.60959	2	53.7808	12.6096		10.5924	3	7	6	28.6096	2		10.5924	24	27.4384	0	19.6096	2		10.5924	11.7808	38.2671	19.8288	26.6096	88.3904		10.5924	7	26.7808	4.60959	4.60959	12.6096		10.5924	40.8288	4	28.5616	18.2192
10.9234	8	30.9041	3.61301	2.38699	12.613	8	11	8	16		10.9234	5.61301	2	58.774	14.613		10.9234	4	9	6	27.613	3		10.9234	21.613	25.4521	0	21	2		10.9234	12.387	40.6781	15.839	25.613	99.387		10.9234	7.61301	30.774	4.61301	5	14.226		10.9234	42.226	5	32.5479	17.226
11.2544	9	32.9315	4.61644	2.38356	13.6164	8.38356	12	8	17		11.2544	5.61644	2	63.7671	16.6164		11.2544	5	11.3836	6	27	3		11.2544	19.6164	22.8493	0	22	2.61644		11.2544	13.3836	43.6986	12.2329	24.6164	109.384		11.2544	8.61644	35.1507	4	5.61644	15.2329		11.2544	43.2329	7	36.9178	16.6164
11.5854	10	35.5788	5.61986	3	13.6199	9	13	9	17		11.5854	6.23973	3	67.1404	19.2397		11.5854	6	15	6.38014	27	4		11.5854	18	21.2397	0	23	2.61986		11.5854	13.7603	46.339	9.23973	24.2397	117.76		11.5854	9.61986	39.5205	3.61986	6.61986	16.2397		11.5854	44.6199	9.38014	43.2808	15.6199
11.9164	11	38.6096	5.62329	3	14.6233	9.37671	14	9.37671	18		11.9164	6.62329	3	70.7534	21.2466		11.9164	8	19	7.37671	28	5		11.9164	16	19.2466	0	23	3		11.9164	14.7534	49.363	6.62329	25.2466	123.753		11.9164	10.6233	43.1301	3.62329	7.62329	16.6233		11.9164	47.2466	12.3767	52.0137	15
12.2474	13	41.2671	6.62671	3	15.6267	10.3733	15.6267	10	18		12.2474	6.62671	4	73.1199	23.8801		12.2474	10	24	8.37329	30	7		12.2474	15	17.2534	0	23	3		12.2474	16.7466	52.1336	5.62671	25.2534	128.747		12.2474	11.6267	46.4931	3	9.62671	16.6267		12.2474	49.6267	16.3733	62.7329	15.3733
12.5785	16	44.9315	6.63014	4	16.6301	10.3699	17	10.3699	18.6301		12.5785	6.63014	5	75.7397	25.8904		12.5785	12	29.3699	9.36986	33.3699	8		12.5785	13.3699	15.6301	0	22.3699	3.63014		12.5785	18.1096	55.1507	4	25.8904	130.11		12.5785	12.6301	47.8493	3	11.2603	16.6301		12.5785	53.6301	20.7397	76.1781	16
12.9095	19.6336	48.9692	7.63356	4.63356	17.6336	11.3664	18.6336	11	18.6336		12.9095	7.63356	7	77.7329	28.2671		12.9095	14	35.3664	11.3664	38	9		12.9095	13	14.2671	0	22	3.63356		12.9095	20.0993	58.5342	3	26.2671	129.733		12.9095	14.2671	48.8322	3.63356	14.2671	16.6336		12.9095	59.6336	26.0993	92.863	17.3664
13.2405	25	53.0069	7.63699	4.63699	19.637	12.363	20	11.363	18.637		13.2405	7.63699	8.36301	80.363	30.911		13.2405	17	42.363	12.363	43	11		13.2405	12.363	13.274	0	21.363	3.63699		13.2405	21.4521	61.911	3	27.274	126.726		13.2405	15.274	48.4521	3.63699	17.911	16.637		13.2405	66.637	31.726	112.26	19.363
13.5715	32	58.0445	8.64041	5.64041	22	13.3596	22	12	18.6404		13.5715	8.64041	11	83.7192	33.2808		13.5715	20	49.7192	14.3596	49	12		13.5715	12	12.6404	0	21	4		13.5715	23.7979	65.9212	3	27.2808	122.719		13.5715	16.2808	46.7979	4	20.9212	16		13.5715	75.6404	37.4384	133.63	22.3596
13.9025	42	64.0822	8.64384	5.64384	25	14.3562	24	12.3562	18.6438		13.9025	9	13	88.3562	36.2877		13.9025	23	57.7123	16.3562	55.3562	13		13.9025	12	11.6438	0	21.3562	4.64384		13.9025	25.7808	70.6438	3	27.9315	116.712		13.9025	17.2877	44.7808	5	25.2192	16.6438		13.9025	86.2877	43.4247	156.329	27
14.2335	56	71.1199	9.29452	6.64726	29	15.3527	25.6473	13	18.6473		14.2335	10.6473	16	93.7055	39.2945		14.2335	26	65.7055	18.3527	62	14		14.2335	12	11.6473	0	22	5.64726		14.2335	28.1164	75.3527	3	28.2945	109.705		14.2335	18.2945	41.411	6	29.2363	16.6473		14.2335	99.2945	49.0582	179.64	33
14.5645	73.3493	80.1575	9.65069	6.65068	33	16.3493	27.6507	14	19		14.5645	11.6507	19.3493	100.699	43		14.5645	30	73.0479	20.3493	68	15		14.5645	12	11.6507	0	23.3493	6.65068		14.5645	31.0959	82.0479	4	29.3014	101.699		14.5645	19.3014	38.3973	7	33.9041	17.6507		14.5645	115.952	54.3973	202.575	41.3014
14.8955	94.3459	90.5411	10.6541	7.65411	38.6541	17.3459	29	14.3459	19		14.8955	13.6541	23.3459	108.038	48		14.8955	34.3459	81.0377	22.6918	73.3459	15.6541		14.8955	12.3459	12.6541	0	26.3459	7.65411		14.8955	33.0753	88.7295	5	30.9623	94.3459		14.8955	19.3082	34.3836	8	38.5788	18.6541		14.8955	134.616	59.0377	223.49	52.9623
15.2265	119.685	102.575	11.6575	8.31507	44	18.3425	31	15	19		15.2265	15.6575	28	117.027	53.3425		15.2265	39.3425	87.3699	25.6849	78.3425	15.6575		15.2265	12.3425	13.6575	0	30.3425	8.65753		15.2265	35.3973	96.3973	7	32.9726	87.3425		15.2265	20.3151	31.0274	9.65753	42.6027	20.6575		15.2265	156.945	63.3699	241.384	67.9452
15.5576	148.678	115.61	12.661	9.66096	50	18.339	33	16	20		15.5576	18.3219	33	126.356	59.6781		15.5576	45	93.3562	29.6781	82.339	15.661		15.5576	12.339	15.661	0	36.339	10.3219		15.5576	38.0342	104.712	9.33904	36.9829	82		15.5576	21.3219	28.0171	11	46.2877	22.661		15.5576	183.949	69.0171	256.579	86.2877
15.8886	180.671	128.644	14.6644	11.3288	56	19.3356	35	17	21		15.8886	22.3288	39.6644	135.678	67.0069		15.8886	51.3356	97.6781	35.6712	85.3356	15.6644		15.8886	12.3356	17.6644	0	43.6712	11.6644		15.8886	42.0137	112.356	13	42.6575	78		15.8886	21.9932	26.0068	12	49.3151	25.6644		15.8886	216.637	75.3425	268.767	109.308
16.2196	213.664	142.678	16.6678	13.6678	63	19.3322	37.6678	18	22		16.2196	27.0034	47.3356	145.661	74.3288		16.2196	59	101.329	42.9966	87.6644	16.3356		16.2196	12.3322	20.6678	0	52.6644	13.3356		16.2196	45.661	119.654	17	51.0034	76.6678		16.2196	23.0034	24.6644	13.6678	51.6747	29.3356		16.2196	254.688	83.9966	278.284	136.017
16.5506	246.986	155.041	19	17.6712	69	19.3288	41	19	23		16.5506	32.0137	56.6712	155.644	82.6438		16.5506	66.3288	103.315	53.9863	89.3288	16.3425		16.5506	12	24.3425	0	63.9863	15.3425		16.5506	51.3151	126.616	21	62.0137	78.3425		16.5506	24.0137	23.6575	14.6712	53.6986	32.6712		16.5506	299.781	95.6575	287.479	166.753
16.8816	278.976	165.747	23	23.3493	74	19.3253	44	19.6747	25		16.8816	38.3733	68.3493	165.627	90.6267		16.8816	75.3253	104.301	68.6267	90.6507	17.3493		16.8816	12	28.3493	0	76.976	16.3493		16.8816	57.976	131.904	27	77.6986	84.024		16.8816	26.024	24.3253	15.6747	56.0479	36.6747		16.8816	351.264	111.651	297.038	201.517
17.2126	307.644	174.103	27	31.3562	80	20	48	20	26.6781		17.2126	46.0685	82.7123	176.288	97.6096		17.2126	83.3219	103.288	87.6096	91.6438	19.0342		17.2126	11.3219	32.3562	0	91.9658	17.6781		17.2126	66.6438	136.185	33.6781	97.0342	93.3904		17.2126	27.7123	25	16	58.0685	41.3562		17.2126	409.158	134.322	310.623	238.308
17.5436	331.637	179.815	31.3185	43.0445	85	20	53	21	28.6815		17.5436	54.7705	99.4075	187.955	103.592		17.5436	91.3185	102.274	111.229	93.3185	21.4075		17.5436	12	37.363	0	108.955	19.363		17.5436	77.3185	139.14	40.363	122.045	107.452		17.5436	29.0445	27	17	59.4075	45.6815		17.5436	472.801	162.682	329.599	277.445
17.8746	349.63	181.849	36.6301	57.3699	90	21	58.3151	22	30.6849		17.8746	64.1644	119.11	200.315	108.575		17.8746	98.3151	99.9452	138.836	94.6301	24.4247		17.8746	12	43.0548	0	126.945	20.3699		17.8746	89.3699	142.096	48.0548	153.37	125.164		17.8746	30.7397	29	18	61.4247	49.6849		17.8746	538.836	199.055	358.301	316.918
18.2057	361.623	180.884	42.6233	76.0651	95	22	64.6233	22	32.6884		18.2057	73.8836	141.507	215	111.558		18.2057	103.623	96.9349	171.116	97.3116	28.1301		18.2057	12	48.0651	0.311644	145.623	21.3767		18.2057	102.065	144.74	56.0651	189.688	146.26		18.2057	31.7534	31.6884	19	63.7534	52.6884		18.2057	606.315	241.442	396.74	357.404
18.5367	366.616	177.226	48.9247	99.0753	101	24	71.6164	24	35.3836		18.5367	84.3014	165.226	231.384	112.541		18.5367	107.616	93.9247	205.699	101.308	32.8425		18.5367	13.6918	55.0753	1	164.308	22.3836		18.5367	114.459	148.699	63.7671	232.308	171.377		18.5367	32.0753	35.6918	20	66.4589	56.6918		18.5367	671.185	290.842	446.616	396.521
18.8677	364.61	171.562	55.9144	125.781	108	27.6952	79.6096	25	38.3904		18.8677	93.0377	189.257	249.781	112.219		18.8677	110.305	90.6096	243.267	107.305	38.5616		18.8677	15	62.0856	1	181.305	24.3904		18.8677	127.171	154.353	72.476	280.914	197.514		18.8677	32.0856	40.3904	22	69.7808	58.6952		18.8677	731.74	344.647	508.562	434.942
19.1987	355.603	165.589	63.9041	156.192	117.301	31.6986	88.6027	27	42.0959		19.1987	102.479	213.685	269.795	110.904		19.1987	110.603	87.6027	280.822	116	45.2877		19.1987	17.6986	70.4931	1	198	26.6986		19.1987	138.288	163.315	80.7945	332.507	224.973		19.1987	31.7945	45.3973	25	73.7945	60.6986		19.1987	784.658	400.781	579.973	473.658
19.5297	342.596	159.914	72.1918	188.212	128.298	37.7021	97.8938	29.2979	45.1062		19.5297	110.233	237.723	292.51	108.192		19.5297	110.298	85.2979	316.767	129	53.0205		19.5297	20.4041	79.5103	2	211.702	29.7021		19.5297	147.021	176.979	90.5103	387.086	251.445		19.5297	30.1062	51.4041	30	79.8082	62.4041		19.5297	829.524	456.637	659.466	514.658
19.8607	324.884	156.644	82.1781	221.938	142.295	44.7055	107.178	32.2945	49.1164		19.8607	116.993	259.76	317.233	104.884		19.8607	109	84.2945	350.007	146	61.0548		19.8607	23.7055	89.2329	2	223.116	35		19.8607	152.76	194.651	101.527	441.945	275.932		19.8607	28.411	58.411	35	86.8219	62.7055		19.8607	866.014	508.521	742.336	559.342
20.1917	305.164	155.962	93.4555	255.38	158.291	53.4178	118.164	36	53.1267		20.1917	123.76	280.089	343.253	102.873		20.1917	108	86.2911	377.24	170	69.7979		20.1917	27.4178	100.253	3	231.127	42		20.1917	156.507	217.62	115.836	494.493	297.723		20.1917	26.4178	66.7089	42	95.8356	63.4178		20.1917	896.106	554.432	825.281	610.887
20.5227	285.438	158.986	108.014	287.123	177.288	64.137	129.151	40.2877	57.8493		20.5227	129.822	299.123	370.562	100.863		20.5227	108	91	399.178	200.712	79.5479		20.5227	32.137	110.986	4.28767	237.562	53		20.5227	158.26	245.589	134.137	542.74	316.521		20.5227	25.137	75	50.7123	106.849	62.7123		20.5227	921.068	590.658	903.589	673.534
20.8538	268.421	166.295	126.274	315.589	198.284	76.1473	140.421	45.2842	61.863		20.8538	135.599	316.726	397.863	100.853		20.8538	109.716	100.716	414.832	239.716	89.589		20.8538	37.1473	122.01	6	241.579	67		20.8538	157.305	279.274	157	584.979	332.325		20.8538	23.4315	84.5685	60.7158	120.579	62.4315		20.8538	944.301	616.904	973.25	749.021
21.1848	255.966	178.315	148.808	339.63	221.562	90.1575	152.685	51.2808	66.8767		21.1848	142.664	335.034	425.158	102.562		21.1848	115	116.438	423.774	286.719	100.349		21.1848	41.1575	132.034	8	245.034	86.2808		21.1848	156.349	317.685	186.842	619.212	345.137		21.1848	22.7192	94.8425	71.7192	135.877	62.1575		21.1848	969.356	632.452	1030.82	841.63
21.5158	249.497	196.336	177.329	359.394	245.832	105.89	163.942	57.2774	71.8904		21.5158	151.729	352.613	452.445	106.832		21.5158	124	140.89	428.438	341.723	112.394		21.5158	46.1678	141.781	10	247.781	111.277		21.5158	155.116	360.387	225.219	645.438	355.51		21.5158	22	105.11	84.4452	153.613	62.1678		21.5158	999.37	638.568	1074.98	952.503
21.8468	251.74	219.356	212.11	374.164	270.822	123.904	176.192	64.274	77.6301		21.8468	161.795	371.904	479	114.548		21.8468	137.274	175.356	429.384	403.726	125.438		21.8468	50.9041	150.534	13	252.26	142.274		21.8468	154.438	407.822	272.11	664.11	366.603		21.8468	23	115.37	96.726	172.356	62.1781		21.8468	1036.34	636.685	1105.26	1081.36
22.1778	263.517	247.836	253.599	384.212	295.812	142.918	187.164	71.5411	84.6473		22.1778	175.589	392.918	505.271	124.812		22.1778	156.541	221.295	429.329	470.729	139.753		22.1778	55.9178	158.565	16.2705	259.753	180.271		22.1778	155.753	458.541	328.952	676.058	378.966		22.1778	25.2705	125.894	109.729	190.647	63.1884		22.1778	1082.54	632.072	1122.82	1226.92
22.5088	286.007	280.863	301.342	391.26	319.801	163.466	198.404	80.2671	93.6644		22.5088	191.925	415.664	530.068	138.801		22.5088	179.801	279.527	429.007	540.466	155.795		22.5088	59.9315	165.329	20.2671	271.26	224		22.5088	159.062	513	395.281	683.74	395.055		22.5088	29.2671	135.137	122	208.397	65.6644		22.5088	1136.43	628.986	1131.7	1385.2
22.8398	318.01	318.627	355.065	394.572	341.791	185.736	209.373	89.2637	103.682		22.8398	211.99	439.418	555.582	157.527		22.8398	207.791	351.253	430.219	610.209	174.363		22.8398	64.6815	172.363	24.2637	287.781	273.736		22.8398	164.89	571.473	471.075	689.164	416.671		22.8398	35.2637	144.373	134	225.418	68.6815		22.8398	1197.54	631.88	1137.54	1550.74
23.1708	360.466	361.137	413.507	397.877	361.781	209	220.342	100.26	117.699		23.1708	235.055	463.918	580.342	180.521		23.1708	239.781	434.753	434.425	677.699	195.918		23.1708	68.6986	180.137	29.2603	309.575	327.479		23.1708	173.438	633.479	554.055	695.342	446.274		23.1708	43.5205	152.603	145.26	239.438	73.1781		23.1708	1262.86	647.014	1145.12	1718
23.5018	411.164	406.175	474.421	400.175	380.514	233.514	232.312	114	135.459		23.5018	262.12	488.432	606.082	208.771		23.5018	274.027	529.294	442.623	741.202	221.459		23.5018	72.7158	189.918	34.2569	337.863	384.973		23.5018	184.486	700.743	642.952	703.798	483.863		23.5018	54.5137	160.568	156.514	250.716	78.2021		23.5018	1329.87	679.12	1162.9	1879
23.8329	468.842	454.959	535.336	403.719	397.507	258.267	246.281	129.747	158.479		23.8329	292.438	511.705	631.801	243.014		23.8329	309.76	630.623	454.068	798.212	251.24		23.8329	76.7329	202.705	39.2534	372.171	443.226		23.8329	198.253	772.507	736.514	716.267	530.438		23.8329	66.7603	168.534	166.76	260.479	84.7192		23.8329	1394.58	732.199	1196.12	2028.75
24.1639	531.5	506.5	594.25	409.75	414.5	282.75	263	148.75	189		24.1639	325.5	535	658.5	283.5		24.1639	346.5	735.25	469	847.5	286.25		24.1639	80	220.5	45.25	410	501.5		24.1639	213.25	852.25	830.25	734.75	585.25		24.1639	82	176.5	178	267.75	91.75		24.1639	1453.5	811	1252	2160.25
24.4949	597.89	560.301	648.425	418.274	431.74	307.219	284.726	172.26	227.027		24.4949	361.562	556.315	684.932	329.973		24.4949	383	839.671	486.425	888.562	326.986		24.4949	83.0137	242.548	51.2466	451.589	556.794		24.4949	229.219	939.712	922.164	758.247	645.534		24.4949	99.9863	185.466	189.986	274.767	100.534		24.4949	1503.12	916.027	1332.81	2271.03
24.8259	665.267	615.353	696.62	429.784	450.973	331.675	311.459	199.027	275.568		24.8259	401.623	576.894	711.349	382.432		24.8259	417.514	938.384	506.349	922.651	373.188		24.8259	85.0274	270.353	57.4863	493.435	610.11		24.8259	247.161	1037.38	1008.53	785.757	710.784		24.8259	118.973	196.188	203.216	282.027	110.325		24.8259	1542.46	1049.54	1440.05	2358.35
25.1569	734.151	673.685	735.836	444.801	473.438	355.116	345.199	230.801	335.123		25.1569	443.925	597.966	736.514	440.116		25.1569	449.041	1026.62	528.514	949.767	425.116		25.1569	87.2808	303.164	63.7192	533.527	660.445		25.1569	265.596	1146.47	1087.13	816.521	777.24		25.1569	140.199	208.918	217.438	292.041	122.123		25.1569	1570.01	1210.04	1572	2421.25
25.4879	801.034	734.274	767.599	463.055	499.89	377.545	384.945	267.11	407.455		25.4879	490.983	620.51	760.435	502.545		25.4879	478.346	1101.88	552.671	972.147	480.253		25.4879	89.2911	339.983	71.4726	570.62	707.565		25.4879	284.781	1267.51	1153.99	847.764	841.127		25.4879	161.418	225.418	233.418	306.055	134.928		25.4879	1585.8	1394.29	1722.65	2460.97
25.8189	866.918	796.877	789.863	484.068	532.329	400.726	431.466	306.904	491.274		25.8189	542.507	647.274	782.123	567.192		25.8189	503.904	1161.4	580.589	990.014	540.123		25.8189	92.3014	379.808	79.6986	601.411	753.712		25.8189	304.726	1400.71	1209.15	878.767	900.726		25.8189	183.397	246.932	250.397	324.068	149.205		25.8189	1590.81	1599.3	1885.79	2480.05
26.1499	929.572	863.264	805.918	508.623	568.442	423.901	483.229	349.476	587.87		26.1499	600.017	680.476	801.589	631.818		26.1499	526.476	1202.4	614.277	1005.89	601.425		26.1499	95.3116	420.87	89.1473	625.952	798.116		26.1499	325.212	1543.85	1250.4	905.459	952.507		26.1499	204.606	274.459	270.147	347.082	166.017		26.1499	1587.1	1817.08	2052.44	2478.46
26.481	988.233	932.219	817.226	536.966	609.068	449.842	537.774	394.062	695.706		26.481	665.74	721.096	819.842	695.425		26.481	546.288	1225.4	654.425	1020.45	663.459		26.481	99.5479	460.932	100.356	642.158	842.541		26.481	346.26	1696.47	1277.02	928.13	996.233		26.481	224.582	309.774	291.904	374.87	185.062		26.481	1576.38	2041.87	2213.29	2459.95
26.812	1041.68	1002.21	825.777	568.329	651.897	477.562	593.555	439.661	812.993		26.812	739.664	771.89	837.116	756.565		26.812	563.106	1230.09	703.342	1036.21	726.236		26.812	105.777	498.771	113.558	651.329	887.209		26.812	367.89	1853.58	1290.25	945.003	1031.68		26.812	242.781	354.11	315.445	405.887	205.329		26.812	1560.44	2264	2360.67	2424.97
27.143	1088.36	1073.79	835.562	603.274	696.479	509.288	648.342	485.055	936.712		27.143	823.781	832.849	854.411	813.918		27.143	578.37	1218.97	762.26	1054.4	787.206		27.143	113.219	532.055	128.973	654.685	933.671		27.143	391.342	2011.22	1291.9	955.849	1060.08		27.143	258.973	408.685	342	439.685	227.589		27.143	1541.71	2473.37	2486.48	2375.27
27.474	1127.83	1144.43	847.784	642.822	741.61	544.805	699.137	529.469	1064.84		27.474	918.079	905.531	873.51	866.825		27.474	593.627	1194.05	831.962	1075.76	848.925		27.474	124.216	561.116	147.158	654	980.154		27.474	416.627	2164.75	1283.87	961.099	1086		27.474	273.726	474.058	372.568	473.705	251.842		27.474	1521.76	2659.55	2588.26	2310.72
27.805	1158.31	1212.11	866	686.206	785.733	583.336	744.151	571.692	1193.58		27.805	1020.76	990.158	895.637	914.733		27.805	609.089	1155.75	911.884	1103.09	912.404		27.805	137.637	586.178	166.548	654.274	1026.45		27.805	444.178	2307.65	1269.71	961.308	1111.68		27.805	285.911	551.664	408.151	507.726	277.301		27.805	1502.03	2814.75	2663.43	2232.62
28.136	1179.8	1274.84	890.627	734.644	829.432	623.88	784.747	611.151	1320.88		28.136	1132.18	1086.73	921	957.849		28.136	627.747	1109.39	1001.8	1135.58	979.072		28.136	154.836	607.24	188.134	657.507	1071.76		28.136	475.986	2434.74	1253.06	957.685	1143.12		28.136	296.88	641.075	450.329	539.956	302.955		28.136	1482.7	2929.78	2714.57	2142.36
28.467	1192.11	1329.82	921.438	786.932	872.932	664.438	818.767	647.425	1442.73		28.467	1247.75	1196.63	951.384	997.753		28.467	651.384	1056.19	1099.52	1174.82	1052.71		28.467	176.027	628.096	211.493	668.493	1114.11		28.467	513.247	2542.27	1235.9	951.014	1186.12		28.467	307.644	739.918	498.945	569.973	327.795		28.467	1463.77	2999.63	2744.27	2041.92
28.798	1198.23	1375.05	959.021	844.079	916.839	704.808	848.586	680.524	1557.27		28.798	1365.27	1318.29	985.788	1034.46		28.798	682.404	1000.34	1201.24	1220.82	1135.33		28.798	201.414	651.959	235.839	690.243	1152.48		28.798	558.14	2626.07	1222.22	943.294	1244.92		28.798	318.818	845.767	554.575	597.192	353.404		28.798	1447	3019.73	2756.33	1934.63
29.1291	1198.58	1409.71	1000.78	903.493	963.384	739.397	876.411	710.658	1661.33		29.1291	1479.94	1450.73	1024.41	1068.16		29.1291	724.192	945.425	1306.38	1272.58	1229.91		29.1291	232.788	683.829	262.171	727.568	1185.88		29.1291	612.836	2681.58	1212.39	936.329	1322.72		29.1291	331.788	955.623	618.219	622.206	377.39		29.1291	1430.79	2991.66	2755.3	1824.7
29.4601	1197.76	1433.58	1046.12	964.969	1012.78	768.805	903.243	738.825	1752.88		29.4601	1587.54	1594.57	1066.85	1099.88		29.4601	777.342	895.243	1410.54	1326.93	1338.27		29.4601	269.147	728.51	288.49	780.685	1217.31		29.4601	680.291	2708	1206.17	929.517	1422.13		29.4601	347.757	1063.88	688.462	645.61	402.147		29.4601	1417.32	2915.83	2744.79	1718.7
29.7911	1198.96	1446.23	1092.45	1026.7	1066.23	789.233	933.082	765.219	1831.15		29.7911	1685.89	1747.21	1111.51	1128.6		29.7911	845.068	854.192	1513.34	1382.88	1459.81		29.7911	313.301	792.014	316.603	850.603	1245.15		29.7911	762.274	2704.55	1201.73	923.466	1543.55		29.7911	367.918	1167.12	765.507	667.808	427.685		29.7911	1406.18	2799.84	2726.99	1622.84
30.1221	1207.38	1450.06	1138.58	1085.86	1125.55	800.058	965.928	791.452	1894.76		30.1221	1770.18	1904.85	1156.36	1155.96		30.1221	926.579	826.507	1613.62	1436.45	1593.32		30.1221	364.449	878.726	346.709	936.144	1275.19		30.1221	859.318	2672.22	1197.45	918.997	1683.98		30.1221	393.072	1259.55	846.928	690.377	453.202		30.1221	1397.78	2651.08	2703.28	1542.71
30.4531	1226.63	1448.42	1184.33	1142.43	1190.75	801.706	1005.6	818.089	1945.2		30.4531	1841.05	2063.51	1202.04	1180.33		30.4531	1022.07	816.219	1710.78	1484.66	1733.98		30.4531	422.589	992.897	379.808	1034.51	1307.79		30.4531	972.623	2611.57	1190.7	914.685	1839.25		30.4531	423.404	1338.34	930.89	713.74	482.144		30.4531	1393.95	2481.35	2672.49	1487.16
30.7841	1260.27	1443.93	1229.72	1195.39	1262.01	794.366	1051.28	847.747	1983.06		30.7841	1895.7	2217.17	1245.91	1202.54		30.7841	1129.36	826.541	1806.83	1522.91	1878.25		30.7841	488.36	1135.47	418.719	1140.09	1347.11		30.7841	1101.35	2527.38	1178.9	911.794	2004.53		30.7841	461.36	1400.91	1017.82	739.271	513.904		30.7841	1394.71	2301.66	2633.41	1460.55
31.1151	1311.11	1441.56	1273.96	1244.55	1337.88	779.397	1104.97	879.603	2010.03		31.1151	1937.14	2361.66	1287.79	1223.6		31.1151	1247.1	860.493	1902.77	1550	2020.49		31.1151	560.315	1306.05	463.452	1250.14	1395.74		31.1151	1242.29	2423	1158.23	908.89	2172.84		31.1151	505.493	1447.64	1104.07	765.781	552.137		31.1151	1401.26	2124.18	2585.25	1468.37
31.4461	1379.13	1446.14	1318.87	1289.23	1419.62	761.079	1166.33	916.822	2031.15		31.4461	1964.2	2489.34	1326.03	1244.35		31.4461	1370.32	920.572	2000.79	1565.13	2153.72		31.4461	638.096	1500.66	516.366	1358.22	1456.84		31.4461	1392.07	2305.55	1129.16	906.623	2337.81		31.4461	557.62	1480.35	1190.27	795.096	597.223		31.4461	1414.26	1959.9	2525.82	1511.98
31.7771	1463.49	1461.66	1365.49	1330.25	1507.75	740.945	1234.06	959.212	2048.64		31.7771	1980.07	2595.02	1361.09	1265.97		31.7771	1495.4	1009	2103.07	1567.46	2273.92		31.7771	719.055	1712.64	578.938	1459.51	1529.55		31.7771	1543.52	2181.64	1091.53	905.185	2491.65		31.7771	618.568	1503.03	1276.42	824.568	651.658		31.7771	1435.73	1816.82	2457.79	1594.23
32.1082	1562.83	1491.63	1414.15	1368.57	1602.27	722.986	1307.64	1007.76	2066.73		32.1082	1987.6	2676.54	1391.32	1290.48		32.1082	1617.17	1124.99	2210.59	1560.99	2377.94		32.1082	803.014	1933.78	651.692	1551.5	1612.83		32.1082	1691.49	2059.41	1046.55	904.753	2630.2		32.1082	689.349	1521.51	1362.53	855.853	717.154		32.1082	1463.89	1702.08	2381.54	1712.31
32.4392	1671.33	1538.4	1465.88	1404.18	1705.14	711.027	1385.56	1062.47	2089.59		32.4392	1989.81	2730.25	1417.53	1320.73		32.4392	1733.51	1266.56	2323.67	1547.86	2465.78		32.4392	886.808	2154.26	734.452	1630.85	1705.97		32.4392	1827.82	1945.82	997.904	908	2749.3		32.4392	770.808	1541.81	1448.1	886.123	795.384		32.4392	1501.41	1619.51	2302.74	1862.05
32.7702	1784.97	1603.49	1519.65	1438.89	1817.18	707.908	1466.49	1121.63	2118.41		32.7702	1988.88	2757.63	1441.07	1357.37		32.7702	1840.59	1430.76	2442.12	1533.91	2535.45		32.7702	968.771	2362.04	826.897	1697.23	1805.15		32.7702	1944.56	1847.83	947.794	917.267	2845.32		32.7702	862.288	1569.25	1535.47	917.219	888.527		32.7702	1546.99	1568.25	2224.74	2037.82
33.1012	1896.73	1687.12	1576.49	1471.71	1939.39	714.952	1548.75	1184.75	2154.37		33.1012	1986.97	2760.88	1462.58	1404.75		33.1012	1936.75	1612.23	2562.24	1524.42	2590.12		33.1012	1047.89	2549.12	926.521	1751.11	1905.19		33.1012	2037.25	1772.91	902.411	935.555	2917.95		33.1012	964.473	1610.52	1625.04	946.993	998.753		33.1012	1602.31	1548.45	2155.25	2231.43
33.4322	2001.31	1785.14	1636.37	1502.45	2072.91	733.997	1630.15	1250.84	2195.76		33.4322	1987.94	2746.01	1485.23	1462.52		33.4322	2023.84	1804.67	2681.83	1525.08	2632.64		33.4322	1123.85	2706.3	1031	1796.15	2003.79		33.4322	2099.43	1726.07	865.466	964.863	2968.22		33.4322	1077.38	1666.77	1718.32	976.62	1126.06		33.4322	1665.54	1555.75	2101.28	2435.91
33.7632	2091.86	1895.92	1698.47	1530.27	2216.56	765.192	1708.68	1315.18	2239.58		33.7632	1994.1	2718.32	1513	1532.81		33.7632	2102.16	2001.38	2797.4	1539.85	2665.71		33.7632	1196.96	2827.44	1137.36	1835.64	2094.11		33.7632	2127.82	1710.99	839.603	1010.19	2998.32		33.7632	1197.89	1740.86	1814.86	1004.11	1270.6		33.7632	1737.85	1585.47	2068.18	2642.27
34.0942	2164.39	2013.31	1761.9	1556.88	2368.2	809.38	1782.5	1377.47	2283.78		34.0942	2006.57	2687.36	1549.88	1616.28		34.0942	2175.72	2193.51	2902.4	1571.74	2688.96		34.0942	1268.91	2909.82	1242.59	1872.71	2173.87		34.0942	2122.48	1728.67	828.675	1074.54	3012.4		34.0942	1322.47	1828.95	1915.18	1030.47	1431.37		34.0942	1818.23	1632.4	2058.95	2841.82
34.4252	2215.6	2131.79	1829.23	1582.27	2523.95	863.849	1849.56	1432.84	2321.66		34.4252	2028.35	2661.44	1599.58	1713.08		34.4252	2247.79	2374.45	2994.36	1620.73	2704.94		34.4252	1339.01	2953	1343.71	1911.44	2240.97		34.4252	2084.59	1777.86	833.979	1160.05	3015.62		34.4252	1448.68	1927.02	2018.99	1055.58	1606.49		34.4252	1904.98	1693.4	2074.6	3027.53
34.7563	2242.93	2247.21	1898.01	1608.32	2679.68	927.158	1907.58	1480.88	2350.01		34.7563	2058.55	2645.84	1666.25	1820.59		34.7563	2323.91	2538.75	3068.01	1685.53	2711.09		34.7563	1411.83	2961.7	1438.74	1957.23	2292.57		34.7563	2019.34	1855.84	855.647	1267.72	3013.13		34.7563	1570.98	2029.95	2123.63	1080.58	1791.8		34.7563	1996.07	1763.6	2114.29	3195.12
35.0873	2246.11	2353.85	1969.82	1637.04	2828.52	997.589	1957.41	1518	2366.82		35.0873	2099	2647.55	1751.88	1938.37		35.0873	2405.49	2680.64	3121.51	1762.15	2707.86		35.0873	1488.64	2939.37	1525.67	2011.48	2329.71		35.0873	1931.77	1957.37	893.521	1398.53	3010.19		35.0873	1685.23	2131.88	2225.52	1105.63	1980.58		35.0873	2088.48	1840.68	2172.01	3340.15
35.4183	2227.27	2447.71	2043.78	1670.87	2963.46	1071.87	1997.2	1543.07	2370.92		35.4183	2146.95	2670.27	1855.34	2063.52		35.4183	2496.38	2797.97	3150.72	1846.47	2692.68		35.4183	1572.2	2895.6	1606.39	2077.75	2352.56		35.4183	1831.89	2074.6	944.856	1549.61	3013.63		35.4183	1787.72	2226.67	2323.52	1132.86	2167.64		35.4183	2180.33	1921.8	2239.77	3462.46
35.7493	2190.16	2525.03	2118.02	1715.13	3079.36	1148.26	2027.69	1554.95	2362.28		35.7493	2202.97	2715.26	1973.77	2191.14		35.7493	2595.68	2887.95	3154.67	1931.77	2664.68		35.7493	1661.78	2837.69	1681.18	2156.89	2365.27		35.7493	1727.01	2201.56	1006.62	1719.81	3025.96		35.7493	1876.42	2310.34	2413.63	1164.88	2345.12		35.7493	2267.58	2006.55	2308.69	3560.01
36.0803	2138.31	2584.67	2192.26	1771.25	3170.47	1225.51	2049.9	1555.66	2344.89		36.0803	2263.3	2779.63	2104.05	2317.82		36.0803	2702.23	2952.16	3135.38	2012.67	2626.34		36.0803	1760	2774.65	1751.92	2249.53	2370.71		36.0803	1628.14	2329.52	1076.92	1902.11	3051.85		36.0803	1949.33	2381.77	2492.1	1204.2	2506.71		36.0803	2347.2	2092.34	2370.64	3636.8
36.4113	2076.44	2624.71	2263.62	1841.25	3232.64	1300.86	2063.73	1546.08	2323.6		36.4113	2324.55	2862.11	2239.07	2437.53		36.4113	2813.01	2991.58	3093	2085.33	2579.05		36.4113	1864.51	2716.36	1824.6	2354.95	2375.16		36.4113	1542.27	2452.23	1151.45	2091.51	3092.4		36.4113	2008.56	2440.11	2555.92	1252.81	2645.66		36.4113	2416.04	2180.64	2416.62	3692.81
36.7423	2011.55	2646.02	2327.21	1927.88	3264.76	1373.96	2071.44	1529.36	2304.53		36.7423	2383.82	2957.56	2370.84	2544.28		36.7423	2924.77	3009.05	3031.65	2145.88	2528.96		36.7423	1974.8	2668.08	1900.61	2470.78	2382.62		36.7423	1475.55	2562.96	1228.33	2279.11	3146.54		36.7423	2054.1	2488.24	2603.17	1316.45	2757.69		36.7423	2471.2	2270.75	2442.5	3732
37.0733	1946.77	2648.68	2380.9	2029.3	3266.05	1444.05	2074.7	1508.49	2294.29		37.0733	2438	3060.1	2491.49	2633.82		37.0733	3031.62	3006.59	2955.45	2193.45	2483.68		37.0733	2088.14	2636.05	1984.8	2596.97	2398.09		37.0733	1432.1	2657.82	1303.39	2457.66	3214.12		37.0733	2089.14	2529.42	2632.61	1395.46	2840.8		37.0733	2512.3	2362.55	2444.53	3755.37
37.4044	1887.09	2635.33	2421.56	2143.64	3240.15	1510.13	2073.89	1488.39	2298.14		37.4044	2485.86	3163.6	2592.94	2700.15		37.4044	3130.43	2989.83	2870.51	2228.92	2450.47		37.4044	2201.51	2624.02	2079.28	2728.45	2425.56		37.4044	1413	2735.79	1376.51	2620.17	3292.08		37.4044	2118.33	2568.42	2644.33	1492.59	2892.98		37.4044	2537.45	2457.06	2424.48	3767.66
37.7354	1834.59	2607.29	2443.41	2267.92	3192.18	1571.21	2071.01	1475.07	2318.84		37.7354	2525.41	3263.07	2670.19	2741.07		37.7354	3216.99	2959.9	2781.9	2255.42	2436.44		37.7354	2311.93	2631.32	2183.25	2862.38	2469.04		37.7354	1416.92	2795.99	1445.68	2758.74	3376.18		37.7354	2144.74	2608.7	2640.19	1607.95	2918.99		37.7354	2549.32	2555.3	2386.25	3770.88
38.0664	1793.05	2568	2446.33	2397.92	3128.03	1627.27	2066.98	1472.65	2357.6		38.0664	2556.58	3353.4	2718.38	2755.72		38.0664	3289.52	2920.83	2695.83	2276.27	2449.47		38.0664	2416.5	2658.59	2297.55	2993.04	2527.53		38.0664	1440.28	2841.49	1509.79	2868.36	3461.38		38.0664	2169.37	2656.82	2622.09	1739.5	2922.84		38.0664	2548.12	2657.3	2335.06	3766.91
38.3974	1762.68	2519.01	2428.1	2528.99	3055.62	1678.34	2060.23	1486.16	2414.12		38.3974	2580.49	3431.6	2737.51	2744.11		38.3974	3346.84	2875.4	2616.01	2297.13	2492.77		38.3974	2512.1	2702.16	2418.06	3116.14	2601.92		38.3974	1476.86	2876.05	1567.92	2946.71	3544.37		38.3974	2194.39	2713.2	2594.23	1884.12	2911.55		38.3974	2537.88	2764.86	2278.92	3759.67
38.7284	1744.25	2465.77	2388.12	2656.13	2985.77	1721.59	2052.42	1520.59	2484.62		38.7284	2600.08	3495.67	2728.6	2712.17		38.7284	3389.14	2824.95	2546.64	2321.49	2566.31		38.7284	2596.93	2757.88	2538.05	3226.15	2689.22		38.7284	1522.74	2904.78	1622.69	2992.12	3618.35		38.7284	2221.47	2780.73	2562.29	2034.91	2892.13		38.7284	2522.28	2875.43	2223.83	3750.28
39.0594	1737.86	2410.51	2329.99	2777.25	2923.7	1757.73	2042.88	1577.86	2564.99		39.0594	2618.36	3542.74	2695.95	2665.93		39.0594	3418.34	2771.29	2489.55	2353.01	2667.99		39.0594	2669.88	2822.45	2652.29	3318.08	2787.36		39.0594	1571.1	2930.64	1671.4	3005.37	3680.01		39.0594	2249.6	2859.4	2531.29	2187.66	2874.4		39.0594	2507.45	2990.73	2176.78	3742.36
39.3904	1743.51	2358.31	2255.89	2887.53	2879.16	1785.03	2029.56	1660.09	2650.24		39.3904	2638.37	3573.7	2645.52	2613.51		39.3904	3437.36	2716.62	2443.61	2394.77	2790.06		39.3904	2730.02	2891.7	2752.73	3388.05	2891.43		39.3904	1620.7	2957.62	1715.96	2991.58	3726.3		39.3904	2276.05	2948.28	2506.32	2333.35	2862.75		39.3904	2496.33	3107.95	2142.06	3736.24
39.7214	1761.08	2313.99	2173.82	2986.88	2856.29	1805.32	2012.46	1765.38	2735.4		39.7214	2664.23	3587.74	2587.22	2564.94		39.7214	3446.57	2661.86	2409.62	2447.74	2924.22		39.7214	2777.35	2959.92	2836.08	3433.16	2998.28		39.7214	1667.79	2989.43	1756.29	2954.64	3753.33		39.7214	2301.5	3044.28	2489.55	2466.09	2864.9		39.7214	2492.03	3224.12	2123.46	3732.76
40.0524	1791.42	2281.72	2090.6	3073.47	2857.23	1819.48	1991.55	1889.72	2816.46		40.0524	2697.96	3587.77	2528.2	2529.31		40.0524	3451.69	2607.18	2384.48	2511.62	3060.63		40.0524	2812.83	3024.77	2896.52	3450.57	3105.11		40.0524	1714.15	3024.25	1793.51	2903.5	3760.03		40.0524	2323.12	3144.29	2485.64	2580.77	2883.06		40.0524	2496.65	3337.16	2121.96	3731.05
40.3835	1834.7	2266.34	2016.32	3146.27	2881.99	1829.71	1966.81	2028.11	2889.44		40.3835	2740.49	3575.7	2477.52	2514.56		40.3835	3451.99	2555.66	2365.11	2585.34	3187.18		40.3835	2837.45	3084.29	2932.68	3442.19	3207		40.3835	1760.92	3062.82	1827.7	2844.41	3745.44		40.3835	2340.79	3243.4	2491.93	2673.4	2918.22		40.3835	2510.05	3443.18	2136.73	3729.23
40.7145	1891.61	2272.01	1958.05	3204.44	2929.68	1838.84	1939.22	2173.56	2953.35		40.7145	2790.95	3554.62	2443.98	2526.87		40.7145	3449.35	2508.2	2351.28	2664.07	3295.84		40.7145	2852.35	3134.68	2946.68	3410.16	3302.96		40.7145	1811.88	3102.01	1860.7	2788.05	3711.58		40.7145	2354.5	3338.51	2509.24	2742.05	2969.46		40.7145	2531.26	3538.25	2166.48	3725.24
41.0455	1961.42	2299.65	1926.56	3249.62	2994.49	1850.94	1910.68	2318.14	3006.19		41.0455	2846.49	3526.54	2432.55	2568.23		41.0455	3444.01	2468.86	2340.1	2745.48	3379.53		41.0455	2861.17	3176.88	2943.3	3358.46	3392.92		41.0455	1870.16	3137.08	1893.69	2740.6	3657.49		41.0455	2365.23	3425.63	2531.72	2788.49	3034.68		41.0455	2555.53	3620.24	2210.31	3716.25
41.3765	2043.92	2351.25	1927.02	3280.1	3071.41	1869.95	1883.2	2451.91	3048.84		41.3765	2905.05	3497.31	2448.22	2637.57		41.3765	3436.62	2439.55	2332.33	2825.62	3433.22		41.3765	2865.14	3211.86	2926.72	3294.19	3474.09		41.3765	1939.41	3164.69	1927.74	2711	3586.35		41.3765	2375.8	3501.68	2555.35	2814.88	3109.98		41.3765	2580.71	3684.3	2265.05	3700.2
41.7075	2139.15	2424.75	1964.36	3296.7	3153.58	1898.95	1861.67	2566.78	3079.53		41.7075	2961.64	3468.01	2491.82	2730.97		41.7075	3424.47	2423.33	2327.16	2901.37	3457.78		41.7075	2868.03	3240.93	2905.89	3225.16	3548.4		41.7075	2019.84	3179.1	1964.7	2703.27	3500.01		41.7075	2389.15	3565.62	2575.04	2823.36	3189.4		41.7075	2601.9	3729.44	2330.64	3673.4
42.0385	2242.29	2516.23	2039.51	3298.4	3236.97	1942.73	1847.18	2656.75	3099.14		42.0385	3013.4	3442.6	2562.37	2839.57		42.0385	3407.31	2425.11	2328.6	2967.86	3454.28		42.0385	2874.82	3266.02	2887.85	3160.36	3614.76		42.0385	2113.13	3177.21	2005.71	2719.5	3400.72		42.0385	2408.36	3615.71	2585.78	2821.64	3270.72		42.0385	2616.05	3754.52	2403.18	3635.68
42.3695	2354.16	2621.49	2150.45	3287.19	3315.62	2000.59	1844.58	2714.86	3107.79		42.3695	3056.38	3422.16	2657.66	2956.09		42.3695	3384.14	2447.71	2338.68	3022.99	3427.65		42.3695	2888.47	3291.21	2879.62	3106.86	3674.29		42.3695	2216.29	3154.13	2051.7	2761.57	3292.41		42.3695	2437.3	3654.68	2581.69	2813.01	3349.97		42.3695	2622.29	3759.63	2484.49	3589.12
42.7005	2468.07	2732.74	2292.26	3263.98	3384.58	2074.39	1856.84	2739.03	3104.57		42.7005	3090.38	3409.57	2771.8	3069.79		42.7005	3353	2491.3	2359.61	3063.02	3386.74		42.7005	2912.91	3319.67	2886.35	3073.5	3726.93		42.7005	2327.33	3109.91	2100.78	2825.57	3177.26		42.7005	2479.88	3682.81	2561.62	2806.13	3421.25		42.7005	2619.68	3744.78	2572.66	3533.75
43.0316	2582.84	2842.93	2455.96	3232.71	3441.78	2160.19	1884.01	2728.32	3091.33		43.0316	3113.63	3403.99	2897.75	3172.53		43.0316	3313.82	2557.78	2395.41	3086.85	3337.74		43.0316	2951.18	3354.32	2912	3064.19	3773.66		43.0316	2443.07	3042.7	2152.78	2906.52	3060.26		43.0316	2537.19	3703.95	2523.66	2805.27	3484.36		43.0316	2611.11	3712.97	2665.73	3473.62
43.3626	2693.62	2946.02	2631.52	3197.43	3486.1	2256.95	1928.08	2684.69	3068.25		43.3626	3129.05	3405.36	3028.64	3258.38		43.3626	3267.54	2646.1	2448.23	3093.59	3290.41		43.3626	3005.13	3397.12	2956.69	3080.92	3813.41		43.3626	2558.6	2957.51	2205.75	2999.45	2944.43		43.3626	2611.11	3721.15	2470.58	2815.32	3535.46		43.3626	2600.74	3666.23	2761.77	3413.58
43.6936	2795.49	3034.12	2810.01	3162.08	3517.5	2358.73	1986.04	2613.13	3036.26		43.6936	3138.58	3413.76	3158.29	3321.36		43.6936	3216.06	2752.29	2520.24	3082.43	3249.01		43.6936	3072.92	3448.22	3017.42	3123.52	3846.24		43.6936	2669.88	2857.42	2256.64	3095.46	2835.79		43.6936	2698.85	3736.5	2406.49	2841.17	3574.47		43.6936	2592.49	3608.6	2858.77	3357.73
44.0246	2885.45	3104.24	2981.47	3132.62	3536.02	2460.51	2057.93	2519.58	2998.39		44.0246	3145.2	3427.29	3278.93	3362.42		44.0246	3161.45	2871.36	2612.38	3055.29	3220.42		44.0246	3153.58	3508.42	3090.29	3186.13	3873.09		44.0246	2773.96	2749.58	2302.47	3189.47	2740.22		44.0246	2798.39	3753.93	2336.37	2884.92	3599.44		44.0246	2594.37	3544.08	2951.93	3309.99
44.3556	2958.55	3152.41	3137.86	3115.05	3543.53	2556.32	2139.73	2412.01	2955.67		44.3556	3151.99	3445.85	3384.53	3381.62		44.3556	3105.71	2997.37	2722.73	3013.36	3205.82		44.3556	3241.1	3573.74	3171.14	3262.58	3893.96		44.3556	2868.86	2643.9	2340.21	3274.63	2661.81		44.3556	2905.81	3774.37	2269.1	2945.62	3611.44		44.3556	2608.4	3477.68	3038.12	3273.38
44.6866	3010.87	3179.63	3272.34	3112.4	3540.04	2642.13	2227.49	2297.43	2912.06		44.6866	3162.75	3468.49	3470.15	3383.85		44.6866	3052.83	3123.26	2847.42	2960.66	3207.15		44.6866	3329.58	3642.12	3252.13	3345.9	3906.92		44.6866	2955.54	2548.51	2367.9	3347.85	2604.47		44.6866	3016.14	3797.85	2211.8	3023.2	3611.46		44.6866	2638.59	3413.48	3111.59	3251.76
45.0176	3041.36	3186.95	3382.83	3127.62	3529.46	2711.96	2316.32	2183.86	2869.53		45.0176	3177.62	3493.29	3532.83	3373.22		45.0176	3004.77	3241.17	2983.25	2901.19	3221.59		45.0176	3411.13	3709.53	3330.11	3427.1	3914.86		45.0176	3032.15	2473.36	2384.53	3405.27	2572.1		45.0176	3124.49	3825.32	2173.36	3113.71	3599.53		45.0176	2685.86	3356.38	3170.18	3244.19
45.3486	3049	3178.34	3466.41	3159.78	3511.8	2762.83	2402.15	2077.28	2831.09		45.3486	3197.46	3518.18	3572.54	3355.64		45.3486	2965.59	3345.06	3125.27	2839.98	3247.14		45.3486	3479.71	3770.89	3399.11	3498.17	3914.88		45.3486	3102.65	2425.41	2390.1	3447.74	2564.65		45.3486	3226.9	3855.71	2161.78	3210.22	3578.67		45.3486	2748.24	3307.47	3211.89	3250.6
45.6796	3031.86	3156.77	3524.1	3207.84	3489.07	2793.68	2482.05	1984.55	2798.6		45.6796	3220.36	3543.19	3587.37	3337.04		45.6796	2936.33	3430.97	3265.47	2781.04	3279.82		45.6796	3528.38	3822.23	3456.18	3554.12	3908.89		45.6796	3167.14	2410.67	2386.62	3474.38	2581.1		45.6796	3319.33	3886.1	2179.14	3306.75	3549.9		45.6796	2821.68	3269.67	3235.79	3269
46.0107	2992.87	3126.26	3555.9	3266.88	3463.23	2801.58	2550.06	1907.77	2773.09		46.0107	3245.24	3566.3	3579.33	3321.42		46.0107	2918.99	3493.95	3397.73	2729.29	3316.68		46.0107	3553.12	3860.52	3501.23	3589.05	3896.9		46.0107	3227.61	2432.01	2375.15	3486.14	2617.37		46.0107	3400.85	3914.4	2228.42	3396.32	3514.23		46.0107	2901.17	3242.04	3241.83	3297.37
46.3417	2935.03	3092.69	3564.81	3333.86	3435.36	2788.45	2605.13	1848.88	2753.51		46.3417	3268.1	3585.48	3553.32	3311.77		46.3417	2914.6	3532.94	3518.01	2689.7	3354.68		46.3417	3550.96	3882.73	3535.3	3600.95	3879.94		46.3417	3286.13	2486.48	2358.74	3487	2668.46		46.3417	3469.46	3940.63	2307.62	3468.99	3474.55		46.3417	2979.66	3225.51	3234.91	3333.68
46.6727	2862.3	3058.07	3550.84	3402.83	3407.43	2755.33	2644.3	1806.91	2740.83		46.6727	3285.98	3598.72	3512.4	3311.03		46.6727	2923.2	3547.97	3619.28	2664.22	3390.84		46.6727	3521.9	3886.88	3558.38	3591.79	3857.98		46.6727	3343.7	2569.94	2342.34	3476.95	2726.4		46.6727	3528.11	3961.79	2411.82	3519.7	3432.85		46.6727	3050.18	3218	3219.08	3373.97
47.0037	2779.64	3025.32	3516.97	3468.81	3380.51	2704.22	2665.58	1780.85	2733.04		47.0037	3294.9	3606.99	3461.55	3318.21		47.0037	2942.84	3541.01	3697.52	2656.74	3425.08		47.0037	3469.88	3871.99	3574.49	3563.6	3833		47.0037	3398.4	2676.37	2327.07	3458.95	2785.21		47.0037	3576.82	3976.92	2535.01	3543.48	3390.11		47.0037	3108.66	3215.59	3200.25	3416.22
47.3347	2695.02	2994.45	3465.18	3527.82	3357.58	2639.12	2668.92	1769.7	2729.15		47.3347	3291.85	3608.27	3405.71	3332.27		47.3347	2974.49	3515.06	3751.69	2667.24	3456.35		47.3347	3397.9	3839.03	3586.62	3520.41	3805.01		47.3347	3450.17	2797.69	2316.88	3432.98	2837.92		47.3347	3618.58	3986.98	2669.23	3535.33	3349.28		47.3347	3150.1	3218.18	3183.46	3456.46
47.6657	2613.39	2966.44	3395.45	3576.86	3339.68	2563.05	2654.29	1771.49	2727.17		47.6657	3273.86	3603.55	3349.86	3350.24		47.6657	3016.23	3476.08	3777.82	2696.63	3484.64		47.6657	3313.94	3788.05	3597.75	3467.25	3775.01		47.6657	3498.04	2922.92	2313.8	3400.02	2879.6		47.6657	3655.36	3992.01	2805.47	3495.22	3312.32		47.6657	3172.48	3221.79	3175.66	3492.66
47.9967	2540.73	2940.27	3311.73	3616.91	3327.83	2483.01	2624.67	1783.25	2727.12		47.9967	3242.9	3593.8	3298.97	3370.14		47.9967	3065.07	3427.07	3773.92	2744.89	3510.86		47.9967	3225.98	3722.03	3609.88	3410.11	3743		47.9967	3539.99	3044.02	2317.85	3361.04	2907.27		47.9967	3688.16	3992.01	2936.73	3424.12	3281.22		47.9967	3176.78	3226.4	3179.84	3521.85
48.3277	2484	2913	3215	3645	3324	2402	2583	1804	2728		48.3277	3196	3580	3256	3387		48.3277	3121	3376	3742	2808	3537		48.3277	3141	3646	3624	3355	3710		48.3277	3573	3153	2331	3315	2921		48.3277	3718	3988	3056	3326	3257		48.3277	3164	3232	3199	3540
48.6588	2447.11	2883.57	3110.15	3662.99	3326.23	2326.01	2530.27	1832.82	2730.96		48.6588	3137.07	3563.07	3220.89	3396.82		48.6588	3181.01	3328.82	3680.1	2883.93	3561.98		48.6588	3069.04	3564.92	3641.05	3307.95	3672.98		48.6588	3595.92	3243.83	2349.24	3261.78	2922.83		48.6588	3744.84	3981.98	3158.19	3207.84	3242.62		48.6588	3137.07	3236.52	3233.13	3546.1
48.9898	2431.14	2850.08	3001.21	3671.97	3333.48	2260.1	2474.42	1869.64	2734.9		48.9898	3067.16	3545.05	3195.67	3396.66		48.9898	3244.08	3291.59	3591.24	2967.71	3586.86		48.9898	3013.09	3483.84	3661.1	3271.95	3631.99		48.9898	3607.85	3310.56	2373.53	3203.46	2914.79		48.9898	3767.72	3973.96	3241.34	3076.63	3239.14		48.9898	3101.04	3243	3280.21	3536.12
49.3208	2435.12	2812.6	2895.14	3672.91	3341.73	2208.26	2417.46	1913.5	2739.84		49.3208	2989.27	3523.94	3177.36	3384.55		49.3208	3309.16	3268.32	3478.43	3055.35	3612.66		49.3208	2977.13	3410.74	3683.11	3250.98	3585		49.3208	3609.74	3350.23	2400.83	3139.03	2901.92		49.3208	3783.67	3964.93	3303.39	2940.39	3244.62		49.3208	3057.95	3250.42	3335.24	3510.07
49.6518	2459.04	2768.18	2795.93	3665.78	3347.96	2172.52	2365.34	1963.37	2746.77		49.6518	2905.4	3502.71	3164.99	3359.51		49.6518	3372.26	3263.03	3344.73	3139.9	3640.41		49.6518	2960.21	3349.67	3705.12	3244.04	3531.03		49.6518	3599.62	3359.89	2429.11	3070.52	2888.21		49.6518	3792.7	3954.92	3344.32	2810.11	3261.07		49.6518	3012.79	3258.75	3391.18	3467.92
49.9828	2495.95	2719.83	2711.57	3650.61	3347.15	2155.87	2322.1	2018.26	2753.69		49.9828	2820.51	3479.37	3154.54	3321.55		49.9828	3434.31	3276.73	3199.08	3216.42	3668.16		49.9828	2961.31	3306.62	3725.1	3251.09	3467.07		49.9828	3580.42	3339.56	2456.34	3000.89	2877.65		49.9828	3790.83	3945.86	3365.12	2695.8	3285.53		49.9828	2967.64	3267.99	3442.03	3411.66
50.3138	2540.88	2668.58	2646.05	3628.34	3333.32	2158.29	2289.75	2076.2	2757.67		50.3138	2736.64	3453.91	3144.11	3273.69		50.3138	3491.33	3308.44	3047.56	3278.95	3696.93		50.3138	2975.41	3284.59	3741.08	3270.06	3395.1		50.3138	3552.16	3288.25	2482.46	2930.27	2874.19		50.3138	3777.08	3934.82	3369.71	2603.54	3318.04		50.3138	2925.53	3276.1	3480.75	3343.32
50.6448	2586.86	2614.48	2603.37	3598.97	3303.41	2178.82	2270.33	2134.11	2757.66		50.6448	2655.79	3424.37	3129.67	3218.88		50.6448	3543.22	3354.18	2900.11	3323.51	3724.75		50.6448	2995.55	3281.62	3751.05	3295.98	3315.12		50.6448	3514.85	3206.06	2507.46	2862.62	2877.8		50.6448	3751.43	3923.74	3359.14	2541.32	3355.62		50.6448	2886.47	3282.09	3500.38	3269.83
50.9758	2628.89	2562.51	2583.64	3560.52	3253.45	2216.36	2262.88	2189.04	2750.7		50.9758	2582.93	3389.78	3109.34	3161.14		50.9758	3588.03	3408	2765.77	3344.21	3749.71		50.9758	3014.71	3297.67	3753.97	3325.75	3229.19		50.9758	3470.49	3094.95	2531.37	2799.03	2889.41		50.9758	3712.93	3910.62	3338.41	2513.16	3397.3		50.9758	2850.51	3281.95	3496.85	3194.27
51.3069	2659.06	2512.72	2586.86	3514.97	3181.51	2266.96	2266.46	2236.98	2732.75		51.3069	2519.11	3351.16	3080.1	3106.4		51.3069	3622.72	3465.81	2652.48	3340.98	3771.8		51.3069	3027.86	3327.75	3747.91	3351.51	3144.18		51.3069	3419.12	2956.97	2555.14	2741.59	2906.02		51.3069	3663.54	3894.48	3311.53	2520.15	3440.12		51.3069	2813.75	3275.7	3467.24	3124.66
51.6379	2674.31	2469.05	2611.06	3460.36	3088.61	2328.53	2277.12	2273.94	2699.9		51.6379	2465.37	3307.51	3040.02	3057.62		51.6379	3646.35	3518.71	2569.21	3312.85	3787.97		51.6379	3029.03	3364.9	3731.86	3371.11	3063.24		51.6379	3358.74	2797.12	2577.82	2690.38	2926.49		51.6379	3606.23	3875.28	3283.58	2561.25	3484.06		51.6379	2775.21	3261.3	3410.53	3065.99
51.9689	2670.68	2432.53	2651.37	3398.76	2978.7	2396.99	2290.85	2297.83	2651.04		51.9689	2425.62	3259.93	2990.1	3018.79		51.9689	3657.91	3560.66	2519.93	3260.87	3796.32		51.9689	3017.09	3404.04	3705.77	3379.68	2994.23		51.9689	3289.36	2621.42	2599.49	2645.44	2946.84		51.9689	3543.01	3852.02	3259.59	2632.53	3527.16		51.9689	2730.83	3236.83	3328.76	3024.23
52.2999	2648.07	2404.1	2703.78	3331.18	2856.89	2469.36	2302.74	2303.81	2582.29		52.2999	2398.93	3208.4	2929.33	2991.82		52.2999	3657.36	3585.7	2505.59	3189	3795.75		52.2999	2988.15	3438.21	3669.71	3372.27	2940.25		52.2999	3209	2437.81	2618.12	2607.81	2963.07		52.2999	3478.86	3822.73	3244.7	2728.89	3567.42		52.2999	2679.56	3205.25	3226.01	3001.56
52.6309	2604.6	2383.82	2761.35	3258.68	2730.23	2541.45	2309.73	2291.8	2494.53		52.6309	2385.27	3156.92	2857.68	2976.67		52.6309	3642.82	3588.77	2524.23	3104.2	3784.22		52.6309	2943.16	3460.4	3626.64	3348.91	2906.31		52.6309	3114.75	2254.33	2632.73	2575.53	2974.18		52.6309	3417.76	3785.44	3241.95	2841.38	3605.84		52.6309	2617.45	3165.6	3108.24	3000.84
52.9619	2544.11	2372.53	2818.15	3183.3	2605.68	2607.46	2306.84	2260.8	2388.72		52.9619	2382.68	3103.58	2777.23	2971.38		52.9619	3616.32	3566.89	2570.76	3014.41	3759.82		52.9619	2884.1	3468.48	3576.62	3307.6	2895.38		52.9619	3008.5	2080.9	2639.38	2548.55	2978.17		52.9619	3365.66	3738.18	3254.38	2963.86	3640.41		52.9619	2546.31	3120.95	2983.44	3020.25
53.2929	2468.57	2367.28	2868.2	3105.12	2493.29	2665.11	2293.95	2211.92	2265.03		53.2929	2391.08	3052.3	2688.82	2974.9		53.2929	3577.87	3519.05	2638.19	2925.64	3723.39		53.2929	2813.98	3457.62	3524.54	3250.43	2905.46		53.2929	2887.35	1927.41	2634.08	2525.82	2975.11		53.2929	3324.47	3680.89	3282.01	3086.41	3671.1		53.2929	2465.21	3072.25	2858.73	3058.68
53.6239	2382.9	2367.92	2906.52	3027.07	2397.16	2709.62	2268.14	2149.07	2130.26		53.6239	2405.45	3002.14	2595.56	2982.18		53.6239	3529.55	3445.3	2716.51	2848.81	3672.92		53.6239	2734.88	3427.66	3472.51	3178.42	2934.55		53.6239	2753.27	1798.99	2614.85	2506.27	2966.95		53.6239	3298.23	3609.75	3321.99	3200.99	3696.96		53.6239	2378.88	3019.64	2742.1	3111.26
53.9549	2291.14	2370.45	2928.99	2948.34	2325.01	2737.85	2230.31	2074.3	1987.57		53.9549	2423.73	2953.12	2502.23	2990.31		53.9549	3474.39	3349.49	2797.68	2788.9	3611.33		53.9549	2650.7	3379.58	3423.53	3095.55	2976.64		53.9549	2609.27	1703.46	2579.72	2488.8	2953.9		53.9549	3289.8	3523.73	3370.3	3302.46	3718.77		53.9549	2290.36	2964.09	2642.49	3171.96
54.286	2199.08	2372.9	2931.75	2869.81	2276.98	2747.85	2181.46	1993.63	1844.79		54.286	2442.82	2906.08	2410.92	2994.29		54.286	3415.36	3236.64	2871.71	2750.84	3538.71		54.286	2564.55	3315.55	3381.51	3008.72	3024.74		54.286	2459.42	1641.91	2527.71	2471.33	2940.82		54.286	3298.26	3422.84	3421.84	3382.91	3734.74		54.286	2204.49	2904.49	2565.86	3234.79
54.617	2109.86	2374.12	2911.68	2791.42	2253.03	2735.85	2122.57	1913.07	1707.02		54.617	2458.77	2860.14	2327.63	2992.03		54.617	3354.55	3111.7	2931.55	2736.66	3459.8		54.617	2477.52	3240.46	3347.41	2920.98	3070.85		54.617	2310.62	1616.21	2459.83	2452.68	2930.84		54.617	3324.46	3306.18	3468.6	3439.28	3745.69		54.617	2127.21	2837.03	2515.22	3292.71
54.948	2027.47	2372.08	2869.81	2712.33	2250.88	2702.73	2057.49	1837.62	1581.26		54.948	2468.56	2814.32	2257.19	2979.73		54.948	3293.99	2983.56	2971.19	2744.26	3376.74		54.948	2392.48	3158.41	3321.38	2840.15	3106.03		54.948	2169.05	1622.4	2380.04	2430.82	2924.9		54.948	3364.49	3176.56	3504.62	3468.67	3750.6		54.948	2060.66	2759.75	2492.62	3338.74
55.279	1955.73	2364.8	2805.92	2633.35	2265.63	2647.78	1987.42	1773.22	1471.37		55.279	2470.09	2768.46	2204.73	2955.38		55.279	3236.63	2859.2	2989.62	2769.76	3295.3		55.279	2309.58	3077.36	3303.21	2771.2	3125.08		55.279	2043.55	1655.52	2293.35	2403.76	2927.1		55.279	3416.27	3038.14	3522.76	3470.95	3747.6		55.279	2009.81	2669.54	2497	3365.95
55.61	1893.9	2353.41	2722.15	2556.32	2290.19	2574.74	1914.34	1722.88	1380.49		55.61	2462.34	2722.5	2175.09	2919.09		55.61	3182.49	2745.59	2984.88	2806.16	3217.58		55.61	2229.83	3000.53	3289.95	2718.97	3120.28		55.61	1943.19	1709.49	2203.92	2371.16	2939.29		55.61	3473.84	2893.85	3519.97	3444.24	3736.52		55.61	1974.71	2564.48	2524.38	3369.29
55.941	1842	2338.81	2620.34	2480.39	2318.37	2484.93	1842.19	1688.52	1308.6		55.941	2442.34	2675.57	2170.31	2871.86		55.941	3132.53	2648.69	2959.88	2847.43	3149.47		55.941	2154.18	2932.87	3277.58	2685.64	3090.34		55.941	1874.05	1774.44	2118.55	2331.25	2961.57		55.941	3532.17	2752.55	3493.13	3390.7	3715.51		55.941	1958.34	2444.59	2570.58	3343.7
56.272	1799.18	2322.07	2506.3	2409.4	2343.29	2383.3	1771.19	1668.29	1256.47		56.272	2412.08	2627.58	2192.45	2813.81		56.272	3085.66	2573.48	2919.53	2887.58	3092.01		56.272	2082.56	2879.4	3260.95	2672.12	3032.56		56.272	1842.92	1844.3	2041.48	2283.82	2992.77		56.272	3586.25	2619.4	3442.08	3314.19	3684.41		56.272	1957.08	2312.89	2628.84	3286.25
56.603	1765.2	2305.34	2383.25	2345.31	2358.08	2272.89	1704.2	1661.02	1219.4		56.603	2370.63	2577.52	2242.42	2749.96		56.603	3040.88	2521.01	2867.97	2919.84	3047.26		56.603	2014.23	2840.05	3234.09	2678.58	2950.71		56.603	1851.03	1910.05	1978.57	2229.99	3031.05		56.603	3629.31	2503.14	3367.03	3217.71	3641.36		56.603	1970.72	2174.4	2691.07	3194.95
56.9341	1736.51	2289.55	2257.92	2289.03	2360.37	2159.64	1641.31	1662.72	1194.14		56.9341	2319.97	2524.39	2317.21	2682.34		56.9341	2997.94	2492.25	2811.27	2942.05	3014.28		56.9341	1950.85	2813.12	3191.17	2702.9	2848.78		56.9341	1901.05	1965.6	1931.74	2170.72	3074.16		56.9341	3656.27	2409.76	3271.69	3105.25	3585.28		56.9341	1995.68	2035.15	2749.47	3070.73
57.2651	1712.76	2275.8	2136.44	2242.7	2345.58	2047.56	1582.71	1668.27	1176.66		57.2651	2262.19	2468.08	2410.87	2615.89		57.2651	2953.07	2485.48	2754.34	2952.33	2993.07		57.2651	1892.61	2797.16	3129.1	2740.38	2732.85		57.2651	1987.14	2003.29	1902.09	2108.14	3117.36		57.2651	3663.14	2345.33	3160.13	2981.92	3516.25		57.2651	2030.86	1904.15	2798.85	2914.58
57.5961	1693.26	2263.18	2025.51	2208.12	2312.62	1939.68	1529.14	1672.85	1161.25		57.5961	2199.38	2405.86	2518.4	2552.82		57.5961	2907.79	2497.68	2702.16	2951.56	2979.7		57.5961	1840.32	2785.47	3044.05	2788.11	2610.11		57.5961	2103.32	2020.77	1889.52	2046.15	3157.47		57.5961	3645.01	2311.74	3036.21	2851.71	3435.26		57.5961	2075.36	1791.23	2833.23	2731.7
57.9271	1677.73	2250.72	1929.47	2184.27	2261.56	1837.93	1479.7	1671.26	1143.7		57.9271	2134.46	2336.54	2631.79	2496.88		57.9271	2858.56	2525.09	2654.24	2938.96	2970.38		57.9271	1794.26	2774.65	2936.95	2839.13	2488.48		57.9271	2241.26	2015.3	1891.85	1986.11	3192.56		57.9271	3599.99	2309.97	2904.09	2721.35	3344.12		57.9271	2128.23	1703.7	2848.8	2529.71
58.2581	1666.17	2236.23	1854.21	2168.32	2194.42	1745.2	1432.51	1659.78	1122		58.2581	2067.73	2259.22	2742.13	2449.29		58.2581	2805.06	2565.51	2612.19	2917.24	2962.03		58.2581	1755.06	2756.91	2808.99	2888.68	2377.08		58.2581	2388.27	1986.69	1905.14	1931.02	3218.65		58.2581	3527	2338.11	2766.75	2592.12	3244.92		58.2581	2190.3	1650.16	2842.49	2315
58.5891	1658.59	2215.92	1805.72	2158.25	2112.4	1661.5	1389.17	1637.01	1093.36		58.5891	2001.22	2173.78	2840.32	2410.85		58.5891	2747.37	2613.39	2571.55	2886.6	2951.86		58.5891	1723.9	2729.02	2666.19	2930.6	2281.93		58.5891	2534.01	1935.04	1927.19	1884.9	3235.73		58.5891	3425.04	2391.93	2628.17	2469.81	3140.74		58.5891	2260.92	1633.61	2814.29	2099.38
58.9201	1654.97	2187.71	1784.18	2151.05	2018.63	1584.71	1346.97	1603.12	1057.68		58.9201	1936.85	2079.44	2920.34	2379.48		58.9201	2684.58	2665.67	2529.26	2847.71	2935.03		58.9201	1699.56	2687.86	2512.79	2960.92	2208.93		58.9201	2666.78	1864.47	1952.96	1850.88	3244.7		58.9201	3295.36	2463.73	2489.33	2356.32	3035.37		58.9201	2342.59	1654.15	2764.44	1892.74
59.2511	1654.11	2147.61	1792.37	2141.73	1917.81	1513.95	1306.6	1556.23	1015.08		59.2511	1872.76	1979.09	2974.19	2354.05		59.2511	2614.78	2719.39	2478.36	2797.91	2910.45		59.2511	1682.14	2631.4	2358.62	2972.66	2159.22		59.2511	2777.14	1778.85	1979.41	1830.18	3245.76		59.2511	3140.85	2546.28	2351.55	2252.83	2932.9		59.2511	2433.42	1710.55	2696.74	1705.18
59.5821	1654.2	2093.74	1827.63	2127.38	1810.28	1446.09	1268.26	1500.99	966.438		59.5821	1808.98	1873.85	2998.09	2327.68		59.5821	2539.99	2771.47	2415.66	2736.08	2874.27		59.5821	1668.62	2559.6	2209.8	2963.63	2135.68		59.5821	2855.62	1682.44	2002.53	1826.75	3241.71		59.5821	2967.44	2629.56	2215.6	2160.25	2835.32		59.5821	2533.3	1795.03	2615.45	1546.59
59.9132	1651.25	2025.12	1886.72	2104	1701.72	1379.12	1231.72	1437.83	913.884		59.9132	1744.42	1766.73	2989.8	2297.13		59.9132	2458.19	2818.94	2334.77	2660.34	2825.54		59.9132	1656.87	2474.55	2072.37	2930.72	2134.35		59.9132	2897.75	1581.88	2020.27	1840.97	3232.63		59.9132	2780	2704.68	2080.6	2077.79	2745.5		59.9132	2639.12	1901.99	2527.22	1423.07
60.2442	1644.14	1943.41	1963.88	2068.84	1591.62	1311.16	1199.07	1369.53	859.301		60.2442	1678.34	1661.62	2949.33	2257.37		60.2442	2369.64	2860.59	2235.92	2568.58	2763.18		60.2442	1644.88	2379.11	1953.11	2872.92	2152.97		60.2442	2899.88	1480.67	2030.6	1874.53	3219.42		60.2442	2585.79	2762.62	1947.67	2005.97	2663.42		60.2442	2744.86	2019.99	2438.3	1338.38
60.5752	1628.1	1848.85	2053.99	2022.53	1484.38	1240.21	1169.31	1299.21	804.818		60.5752	1610.54	1560.64	2878.78	2202.64		60.5752	2274.24	2891.43	2117.47	2460.92	2685.33		60.5752	1627.74	2277.5	1854.03	2791.73	2186.54		60.5752	2863.62	1384.71	2032.63	1927.72	3202.32		60.5752	2391.58	2796.37	1815.95	1943.15	2586.45		60.5752	2846.39	2140.39	2355.72	1293.63
60.9062	1602.16	1745.44	2148.92	1964.34	1379.39	1168.14	1145.29	1228.86	752.315		60.9062	1540.9	1466.67	2781.28	2130.67		60.9062	2174.72	2909.34	1983.33	2336.51	2591.92		60.9062	1604.07	2171.98	1775.14	2687.5	2229.92		60.9062	2789.2	1297.75	2025.33	1998.33	3179.08		60.9062	2204.49	2799.92	1687.18	1887.32	2514.05		60.9062	2936.56	2253.54	2286.11	1287.54
61.2372	1564.58	1636.93	2240.06	1895.27	1279.4	1094.2	1125.27	1159.48	702.925		61.2372	1470.71	1380.72	2662.72	2039.59		61.2372	2069.62	2913.04	1839.12	2199.37	2484.1		61.2372	1569.48	2067.15	1713.33	2565.82	2278.23		61.2372	2683.75	1221.06	2010.54	2083.38	3147.81		61.2372	2029.39	2771.13	1561.52	1837.35	2442.62		61.2372	3009.2	2350.28	2234.59	1313.35
61.5682	1516.26	1527.45	2320.3	1818.05	1184.41	1020.4	1110.84	1093.21	656.658		61.5682	1402.58	1303.78	2527.36	1930.37		61.5682	1962.41	2899.67	1690.82	2052.52	2361.64		61.5682	1523.44	1965.4	1665.58	2429.64	2328.16		61.5682	2554.85	1156.53	1987.93	2178.78	3103.52		61.5682	1871.3	2707.38	1439.97	1792.23	2367.29		61.5682	3056.55	2425.59	2204.88	1366.64
61.8992	1458.36	1420.86	2384.65	1734.97	1095.42	948.473	1100.37	1029.91	614.524		61.8992	1339.5	1233.86	2381.08	1805.15		61.8992	1853.09	2866.78	1545.72	1903.84	2227.71		61.8992	1465.34	1866.88	1626.47	2284.08	2375.13		61.8992	2410.9	1105.03	1960.95	2278.4	3043.07		61.8992	1732.07	2612.56	1324.68	1749.95	2285.92		61.8992	3076.3	2473.42	2197.1	1438.79
62.2302	1394.77	1323	2427.25	1648.73	1013.43	879.842	1093.59	970.747	577.247		62.2302	1282.64	1169.95	2230.19	1667.94		62.2302	1743.79	2812.77	1412.23	1757.33	2085.05		62.2302	1395.03	1773.33	1588.42	2134.94	2419.55		62.2302	2261.89	1065.71	1931.86	2375.11	2963.74		62.2302	1610.97	2488.94	1218.24	1711.5	2196.37		62.2302	3064.55	2491.9	2210.11	1523.36
62.5613	1327.66	1235	2444.43	1561.62	939.294	817.233	1088.47	915.712	542.404		62.5613	1235.69	1110.9	2077.72	1524.72		62.5613	1635.22	2736.63	1296.78	1620.16	1936.81		62.5613	1316.65	1685.04	1547.12	1986.34	2457.97		62.5613	2117.68	1036.41	1903.53	2461.61	2862.53		62.5613	1507.88	2341.54	1121.08	1675.01	2097.08		62.5613	3021.29	2480.86	2241.58	1612.75
62.8923	1262.75	1161.7	2436.93	1475.36	873.301	759.794	1084.15	865.671	511.425		62.8923	1199.66	1055.86	1929.53	1381.36		62.8923	1530.36	2640.04	1204.07	1496.04	1789.56		62.8923	1231.36	1601.58	1498.4	1843.25	2489.23		62.8923	1986.26	1016.15	1877.23	2530.19	2742.01		62.8923	1419.93	2178.55	1035.77	1640.64	1988.75		62.8923	2947.77	2441.56	2284.93	1701.64
63.2233	1201.06	1103.23	2403.07	1391.08	814.462	709.384	1078.61	821.623	481.606		63.2233	1174.68	1002.99	1785.98	1243.14		63.2233	1429.17	2523.28	1136.53	1388.98	1645.3		63.2233	1143.15	1521.39	1437.69	1708.78	2512.34		63.2233	1872.92	1004.62	1854.99	2575.38	2604.47		63.2233	1343.99	2006.13	962.757	1608.94	1873.4		63.2233	2849.67	2377.46	2335.84	1785.86
63.5543	1145.44	1059.58	2344.74	1310.63	763.63	665	1070.69	782.884	452.959		63.5543	1161.28	951.966	1650.08	1115.08		63.5543	1334.5	2390.66	1094.86	1299.82	1509.01		63.5543	1055.9	1445.04	1366.53	1585.25	2523.43		63.5543	1780.68	1000.1	1838.49	2592.47	2454.89		63.5543	1276.06	1830.34	902.596	1577.51	1753.03		63.5543	2731.45	2293.42	2386.75	1861.14
63.8853	1096.04	1030.59	2265.8	1233.16	719.966	624.805	1059.53	750.151	425.332		63.8853	1156.76	903.952	1523.41	1000.18		63.8853	1247.46	2246.87	1077.53	1226.86	1384.36		63.8853	971.908	1371.51	1286.03	1475.47	2520.51		63.8853	1710.23	1001.29	1827.22	2579.97	2301.29		63.8853	1213.46	1659.05	855.757	1545.05	1630.62		63.8853	2600.1	2196.62	2434.17	1926.86
64.2163	1053.23	1011.88	2168.62	1158.67	681.315	588.479	1042.44	723.425	397.89		64.2163	1158.1	857.945	1405.3	901.301		64.2163	1169.37	2097.38	1080.4	1169.47	1274.32		64.2163	894.206	1300.78	1197.36	1378.62	2499.74		64.2163	1656.04	1007.48	1820.85	2538.32	2153.16		64.2163	1152.88	1497.3	821.603	1509.73	1509.36		64.2163	2463.62	2096.4	2471.58	1981.32
64.5473	1014.48	1001.8	2057.88	1088.16	646.846	555.014	1021.27	701.041	370.308		64.5473	1160.29	816.777	1295.62	820.435		64.5473	1103.89	1949.06	1097.64	1122.27	1179.85		64.5473	823.644	1231.19	1106.48	1295.68	2457.63		64.5473	1613.8	1017.51	1816.56	2470.17	2019.83		64.5473	1092.32	1348.95	798.616	1470.38	1392.9		64.5473	2327.51	1998.97	2496.13	2023.83
64.8783	977.774	996.692	1938.1	1020.46	615.397	522.397	993.527	683.507	342.918		64.8783	1161.32	780.438	1195.86	755.753		64.8783	1053.16	1808.25	1124.12	1082.95	1099.11		64.8783	761.233	1164.4	1016.4	1224.17	2390.84		64.8783	1575.69	1031.2	1813.53	2380.86	1909.26		64.8783	1029.95	1218.84	784.466	1423.19	1282.42		64.8783	2197.46	1915.21	2503.66	2054.58
65.2094	942.428	989.887	1811.45	955.904	584.969	490.795	960.726	667.986	317.38		65.2094	1156.19	749.267	1103.21	706.918		65.2094	1017.37	1680.8	1152	1047.66	1032.72		65.2094	706.158	1100.57	932.935	1162.78	2297.86		65.2094	1534.89	1046.87	1810.79	2276.17	1827.46		65.2094	966.428	1107.16	775.49	1367.34	1182.73		65.2094	2075.01	1850.68	2493.01	2075.24
65.5404	905.288	979.233	1681.92	894.507	554.384	458.849	923.397	653.479	292.863		65.5404	1143.88	724.918	1019.29	672.096		65.5404	997.849	1571.58	1174.96	1014.41	976.808		65.5404	658.904	1038.89	857.767	1109.68	2179.88		65.5404	1485.88	1064.36	1808.16	2163.29	1778.59		65.5404	899.932	1017.22	768.521	1302.48	1094.84		65.5404	1963.01	1812.75	2461.7	2084.52
65.8714	866.818	960.558	1552.97	836.914	523.63	426.904	881.39	637.168	271.003		65.8714	1121.56	706.38	943.089	647.469		65.8714	995.271	1483.57	1187.81	981.373	928.719		65.8714	617.825	980.363	792.377	1062.1	2038.7		65.8714	1423.2	1080.82	1805.86	2048.18	1763.47		65.8714	831.456	948	761.558	1228.62	1018.9		65.8714	1858.87	1803	2408.38	2085.11
66.2024	827	931.233	1425.56	781.671	491.699	394.774	834.911	617.692	252.151		66.2024	1090.05	693.644	874.404	632.308		66.2024	1008.18	1414.79	1185.55	947.192	885.253		66.2024	582.747	925	738.123	1018.49	1878.31		66.2024	1346.12	1095.26	1806.7	1935.23	1779.27		66.2024	763.63	900.479	749.788	1147.14	957.103		66.2024	1760.82	1822.73	2333.05	2075.38
66.5334	785.377	890.089	1302.49	730.233	458.579	364.26	786.801	594.041	236.305		66.5334	1050.34	685.075	811.39	621.336		66.5334	1033.25	1365.08	1166.16	913.044	842.767		66.5334	550.856	873	693.017	976.233	1704.89		66.5334	1253.58	1105.87	1811.08	1829.86	1820.19		66.5334	696	872.637	731.031	1061.1	908.086		66.5334	1666.36	1866.98	2235.09	2055.21
66.8644	744.575	836.137	1184.51	681.973	425.068	334.918	736.274	565.397	223.466		66.8644	1003.79	679.493	755.836	614.178		66.8644	1067.66	1329.41	1127.44	877.932	800.877		66.8644	523.781	823.384	655.068	933.164	1526.26		66.8644	1149.03	1111.27	1823.45	1732.01	1879.23		66.8644	631.808	863.068	703.671	971.63	870.027		66.8644	1573.51	1930.58	2116.75	2025.6
67.1954	705.586	771.387	1072.16	634.901	391.538	306.757	684.36	531.37	215.438		67.1954	951.24	675.897	706.099	606.021		67.1954	1107.44	1302.41	1070.98	841.853	756.147		67.1954	498.705	775.976	620.483	888.291	1349.2		67.1954	1035.65	1110.05	1843.21	1644.14	1947.6		67.1954	571.805	867.514	668.339	883.784	841.123		67.1954	1479.7	2004.93	1980.61	1985.61
67.5264	668.596	697.849	966.822	590.829	358.788	281.192	633.493	493.938	209.411		67.5264	896.87	672.288	661.973	596.664		67.5264	1146.41	1277.25	999.137	805.61	709.39		67.5264	476.63	729.788	588.082	842.425	1180.1		67.5264	918.274	1100.82	1870.37	1563.64	2016.12		67.5264	518.404	884.377	623.233	799.137	817.185		67.5264	1384.38	2080.24	1830.46	1934.05
67.8575	634.606	618.534	867.853	546.757	327.212	258.808	583.675	453.486	206.384		67.8575	841.493	667.866	624.637	582.706		67.8575	1180.59	1250.73	915.688	769.192	660.808		67.8575	456.353	684.829	554.281	793.767	1025.14		67.8575	802.089	1082.78	1904.35	1491.33	2074.21		67.8575	471.99	908.233	571.959	719.294	794.414		67.8575	1288.57	2146.08	1672.11	1871.54
68.1885	603.411	536.247	777.014	502.89	298.411	237.616	535.315	412.808	205.562		68.1885	785.521	659.849	594.082	564.342		68.1885	1205.97	1217.22	824.014	730.589	612.206		68.1885	436.479	640.11	517.699	743.918	888.74		68.1885	690.904	1055.15	1939.16	1424.42	2115.48		68.1885	432.562	934.082	515.918	646.452	769.027		68.1885	1194.68	2194	1512.55	1798.51
68.5195	574.209	455.986	693.099	460.031	272.791	219.418	488.808	372.103	205.747		68.5195	730.555	649.048	570.507	540.39		68.5195	1217.37	1175.11	728.894	689.791	565		68.5195	417.195	595.223	478.346	693.075	772.699		68.5195	588.137	1017.75	1971.02	1361.73	2132.36		68.5195	400.12	958.716	456.911	581.192	739.418		68.5195	1102.91	2217.17	1358.97	1715.33
68.8505	547	379.753	618.473	417.39	249.363	203.212	445.144	334.945	207.726		68.8505	676.021	634.473	553.123	511.445		68.8505	1212.79	1124.78	633.733	646	521		68.8505	397.116	550.37	436.445	642.24	677.829		68.8505	495.384	972.151	1993.13	1302.48	2121.47		68.8505	373.877	977.336	397.726	521.342	702.212		68.8505	1017.05	2210.55	1215.17	1625
69.1815	519.784	310.332	551.75	375.548	228.921	189	403.527	302.747	209.137		69.1815	622.723	616.349	543.51	478.507		69.1815	1189.22	1066.23	543.531	599.784	481.784		69.1815	376.253	506.336	392.801	593.411	603.14		69.1815	413.86	917.216	1997.72	1245.47	2079.8		69.1815	353.627	985.373	340.568	468.062	658		69.1815	938.644	2171.87	1088.35	1529.51
69.5125	492.562	249.151	492.151	334.712	211.466	176	364.74	274.945	210.342		69.5125	569.671	596.26	539.096	441.795		69.5125	1147.22	1003.23	460.068	551.342	446.219		69.5125	353.397	462.11	349.205	547.151	547.425		69.5125	343.795	856.096	1979.59	1189.49	2006.81		69.5125	337.589	980.411	288.219	419.548	607.562		69.5125	869.89	2102.1	980.507	1432.41
69.8435	463.332	196.997	441.24	296.106	195.664	163.777	328.771	253.671	210.555		69.8435	516.654	574.873	539.113	404.096		69.8435	1087.45	938.206	385.781	500.887	416.445		69.8435	328.548	419.682	307.658	504.106	506.127		69.8435	285.318	789.781	1934.97	1133.55	1905.86		69.8435	323.551	961.226	241.668	375.014	552.332		69.8435	809.544	2003.39	893.644	1337.12
70.1745	432.096	154.418	396.911	259.514	182.644	152	295.384	236.808	209		70.1745	464.897	555.089	541.13	365.411		70.1745	1010.45	875.151	320.678	450.418	390.678		70.1745	302.932	379.041	269.158	465.062	475.815		70.1745	236.089	719.486	1861.44	1076.87	1779.95		70.1745	311.74	926.486	201.13	334.233	495.644		70.1745	759.801	1881.71	828.76	1247.62
70.5055	399.623	119.853	358.736	225.935	170.623	141.771	264.247	225.688	206.229		70.5055	413.952	537.805	543.147	327.969		70.5055	920.459	815.839	265	401.705	367.918		70.5055	275.329	340.178	234.476	430.017	453.49		70.5055	195.116	647.983	1759.22	1019	1634.54		70.5055	301.164	876.524	167.377	296.654	440.164		70.5055	718.411	1742.24	783.086	1165.9
70.8366	364.836	93.0685	324.959	195.603	159.068	131.767	236.671	217.767	200.466		70.8366	365.041	524.342	543.397	292.548		70.8366	821.233	761.726	218.301	356.205	347.164		70.8366	246.74	305.082	204.603	399.205	435.384		70.8366	161.178	575.493	1633.08	958.164	1476.19		70.8366	290.37	814.794	140.397	262.822	388.671		70.8366	684.808	1591.19	756.164	1096.19
71.1676	329.582	72.2911	295.363	169.582	149.055	122.527	211.11	212.055	192.473		71.1676	318.401	515.928	538.418	259.147		71.1676	717.236	714.586	179.818	314.692	326.182		71.1676	219.164	272.743	178.527	373.164	418.271		71.1676	134.038	505.308	1486.8	893.89	1312.66		71.1676	279.582	743.836	118.418	232.962	343.401		71.1676	658.219	1436.01	744.932	1039.25
71.4986	293.801	57.2808	267.678	146.281	138.281	113.521	189.322	207.562	181.719		71.4986	276.322	512.322	526.918	229.527		71.4986	612.24	671.658	147.562	278.925	303.438		71.4986	192.603	243.39	156.24	350.884	400.911		71.4986	111.685	438.116	1328.36	826.397	1151.17		71.4986	268.041	666.877	100.438	207.315	306.404		71.4986	637.404	1281.71	747.459	995.555
71.8296	258.784	45.5137	242.729	127.271	128.514	104.514	169.541	203.055	169.729		71.8296	238.027	512.757	507.945	201.921		71.8296	512	633.952	121.298	247.623	280.216		71.8296	167.055	217.781	137.729	331.839	380.781		71.8296	92.5959	376.675	1163.51	754.918	996.733		71.8296	255.514	587.675	87.2158	187.404	276.866		71.8296	621.596	1132.51	761.709	965.106
72.1606	224.767	36.5069	218.247	110.507	118.507	97.2603	152.767	197.027	155.74		72.1606	204.507	515.74	480.219	178.329		72.1606	418.753	597.726	100.274	221.562	254.233		72.1606	144.274	194.397	121.986	315.041	358.644		72.1606	78.2877	319.973	1000.48	680.206	855.096		72.1606	242.753	509.712	75.9863	171.959	254.562		72.1606	609.288	992.685	786.726	946.671
72.4916	192.25	29.75	195	96.5	108.75	89.5	138	189.5	140.75		72.4916	176.25	519.75	445.25	156.75		72.4916	336.5	562.75	82.25	199.25	226.25		72.4916	124.5	172.75	107.25	300.75	334.25		72.4916	65.75	270.25	844.5	605.25	730		72.4916	229	435.5	67	161.5	238.75		72.4916	600	864.25	819.25	938.5
72.8226	163.24	24.7466	172.747	84.4931	99.7466	83.2397	125.986	179.466	125.76		72.8226	153.507	522.281	404.534	137.185		72.8226	265.24	525.288	67.4795	180.438	198.014		72.8226	106.733	154.082	94.2671	287.959	307.842		72.8226	56.226	226.76	700.294	530.294	622.185		72.8226	215.253	367.534	59.0137	155.774	226.425		72.8226	592.986	747.733	858.794	936.856
73.1536	136.743	20	151	74.4863	90.7431	77.4863	114.973	166.688	111.771		73.1536	134.771	521.082	359.312	119.634		73.1536	206.229	487.103	55.4589	163.377	169.771		73.1536	91.9726	136.137	82.0274	275.918	281.164		73.1536	48.4589	191	571.596	459.082	531.89		73.1536	200.514	307.312	52.5137	153.541	216.349		73.1536	586.514	643.661	901.36	940.99
73.4846	114	17	131.74	65.4795	83.7397	71.7397	105.219	152.658	97.7808		73.4846	121.041	514.384	313.082	105.096		73.4846	158.219	445.205	45.6986	147.575	142.521		73.4846	79.9589	120.425	71.0411	263.877	254.986		73.4846	41.9589	160.479	458.644	393.863	458.096		73.4846	186.521	255.082	46.5205	153.301	206.534		73.4846	581.822	551.315	944.945	945.932
73.8157	95.2637	14.7363	114	58.4726	77	67.7363	97.2089	136.89	85.7911		73.8157	110.318	500.692	266.846	91.8356		73.8157	121.209	402.606	37.9452	132.045	116.527		73.8157	69.2089	105.692	61.7911	250.363	230.538		73.8157	36.2089	136.682	362.428	335.901	396.836		73.8157	173.527	210.846	41.2637	155.318	195.726		73.8157	576.692	470.462	985.815	951.13
74.1467	80.5342	12	98	52.1986	72.7329	64	89.1986	120.863	75.5342		74.1467	103.336	479.473	222.603	81.3288		74.1467	92.1986	358.315	31.9315	116.527	94.2671		74.1467	60.9315	92.9384	52.5342	235.596	208.342		74.1467	31.4658	117.397	282.938	286.671	347.062		74.1467	159.534	174.603	36.2671	158.068	183.925		74.1467	570.342	400.123	1020.71	952.623
74.4777	68.8116	10.7295	84	47.1884	68.7295	61.2705	82.1884	104.106	66.5411		74.4777	97.8938	451.247	183.082	72.8356		74.4777	71.1884	313.072	27.1884	101.753	74.2705		74.4777	54.1884	81.1644	46.2705	219.106	189.14		74.4777	27.4589	102.836	217.435	246.435	306.024		74.4777	147.271	145.353	32.2705	159.812	169.671		74.4777	562.305	339.318	1046.64	949.61
74.8087	62.0959	9	72.726	43.1781	65.726	58.274	75.4521	88.3562	59.5479		74.8087	93.9178	415.288	148.822	66.3562		74.8087	55.1781	269.877	24.1781	87.2603	58		74.8087	48.1781	70.9178	41	200.356	173.658		74.8087	24.4521	91.8082	164.918	215.192	270.26		74.8087	135.274	121.37	28.274	159.822	154.164		74.8087	550.767	288.521	1060.32	941.068
75.1397	58.387	8	63	40.1678	63.4452	56.5548	69.4452	73.8904	53.5548		75.1397	91.2192	374.051	120.555	61.8904		75.1397	43.1678	229.452	22.1678	73.7808	45		75.1397	43.1678	63.1096	37.7226	180.89	159.438		75.1397	21.7226	83.5034	124.387	191.219	238.781		75.1397	124	102.832	25.2774	158.11	136.671		75.1397	534.986	246.284	1060.74	925.979
75.4707	56.6849	6.71918	55.7192	37.8767	61.4384	54.5616	64.4384	60.8767	48.5616		75.4707	88.5274	329.808	97.2808	58.7192		75.4707	34.1575	192.068	20.4384	61.3151	34		75.4707	39.1575	56.8425	35.4384	160.158	148.212		75.4707	19.7192	77.4726	92.1233	173.966	210.034		75.4707	113	88.8425	23.2808	155.123	119.473		75.4707	514.233	212.788	1045.45	904.322
75.8017	57.9897	6	48.7158	36.1473	59.7158	53.2842	59.4315	49.4315	44.2842		75.8017	85.5582	283.274	80.2842	57.2842		75.8017	27.4315	158.158	20.1473	49.863	26.7158		75.8017	35.4315	51.5685	34.4315	139.432	137.979		75.8017	18.7158	73.1575	67.8527	160.99	183.295		75.8017	103	77.5685	21.2842	149.137	102.01		75.8017	488.37	185.589	1014.19	877.791
76.1328	60.0137	5	44.4247	34.137	58.4247	51.5753	55.4247	40.4247	40.5753		76.1328	81.8767	237.014	67	55.863		76.1328	22.4247	129.274	20.137	40.8493	20.7123		76.1328	31.7123	48.2877	34.4247	118.712	127.74		76.1328	18	69.411	49.5753	150.014	159.274		76.1328	93.7123	68.5753	20.2877	142.151	85.5616		76.1328	456.507	165.123	968.37	847.356
76.4638	62.3288	4.7089	40.4178	33.1267	56.4178	50.2911	51.4178	32.7089	37.5822		76.4638	77.911	193.747	58	56.1644		76.4638	18.4178	104.127	20.1267	33.4178	16.7089		76.4638	28.7089	46.2911	35.1267	99	117.493		76.4638	19	66.6712	36.2911	141.038	136.836		76.4638	84.4178	62.2911	20.2911	134.164	70.8356		76.4638	419.644	150.671	908.849	816.277
76.7948	63.6507	4	37.411	31.411	53.7055	48.2945	47.411	26.7055	35.2945		76.7948	73.6507	154.473	52	55.4726		76.7948	15.411	83.411	20.411	27.7055	13		76.7948	25.7055	45.2945	35.8219	82	107.24		76.7948	21	64.6438	26.2945	132.767	117.116		76.7948	75.7055	57.2945	20	126.178	57.411		76.7948	378.897	139.938	838.048	785.24
77.1258	64.6815	3	34.7021	29.7021	51.7021	46	43.7021	21.7021	32.2979		77.1258	69.6815	120.192	48	54.0856		77.1258	12.7021	66	20.4041	23	10.7021		77.1258	22.7021	45.2979	35.8082	67	96.6815		77.1258	23.2979	62.6164	19.2979	122.788	99.4041		77.1258	67.4041	53	20	117.192	46.7021		77.1258	335.13	131.808	758.551	756.808
77.4568	64.411	3	33.6986	28.3973	49	43.6986	39.6986	18	29.6027		77.4568	64.7123	91.2055	45.3014	52.411		77.4568	11.6986	52	20.3973	20	9		77.4568	20	46.3014	35.7945	54	85.411		77.4568	28.3014	59.8904	14.3014	112.507	84.6986		77.4568	60.3973	49	20	108.205	37		77.4568	290.342	126.795	673.767	733.671
77.7878	62.4384	2	32.6952	26.6952	47	41.6952	35.6952	15.6952	27.3048		77.7878	61.4384	68.6096	44.3048	50.1336		77.7878	10.6952	41.3048	20.3904	18	7.69521		77.7878	18	47.3048	34.7808	44.6952	74.4384		77.7878	33.6096	57.8664	11	101.219	73		77.7878	53.3904	45.6952	20.3048	101.219	30		77.7878	246.925	122.086	586.99	716.113
78.1188	58.4658	2	32.6918	24.6918	44.3082	38.6918	32	13	25.3082		78.1188	57.4658	50.6164	44.3082	46.4658		78.1188	9.69178	33	19.3836	16.3082	7		78.1188	15.6918	49.3082	33.0753	37.6918	63.8493		78.1188	40.9247	55.1507	8.30822	89.2329	64.3082		78.1188	47.3836	42.6918	20.3082	93.9247	24		78.1188	205.781	117.384	502.219	704.74
78.4498	54.1815	1.68836	33.6884	22	42.3116	35.6884	28.6884	12	23.3116		78.4498	55.1815	37.3116	43.3116	42.4931		78.4498	9.68836	27	19.3767	15.3116	6.68836		78.4498	14	51.3116	30.7534	32	54.5582		78.4498	49.9349	53.1301	7	76.9349	57.3116		78.4498	41.3767	39.3767	20.3116	87.9349	20		78.4498	167.921	113.377	420.767	700.25
78.7808	48.2055	1	34.6849	20	40.3151	32.3699	24.6849	11	22		78.7808	52.8904	27.6301	43.3151	38.2055		78.7808	9.68493	22	18.3699	14.3151	6		78.7808	12	53.6301	28.0548	28.6849	45.2603		78.7808	60.2603	50.4247	5.31507	64.9452	52.3151		78.7808	36.3699	36.3699	20.3151	82.9452	16.3151		78.7808	134.726	108.685	345.329	702.274
79.1119	41.911	1	36.6815	17.3185	38.3185	29.363	21	10	20.3185		79.1119	50.5925	21.3185	43.3185	32.911		79.1119	9.68151	19	17.6815	13.3185	6		79.1119	10	55.637	24.363	26.6815	38.274		79.1119	70.911	48.4075	5.31849	53.9555	48.637		79.1119	32.363	33.363	20	79.637	14		79.1119	107.822	102.682	278.904	708.514
79.4429	35.6096	1	39	15	36.3219	26.6781	18	9	19.3219		79.4429	48.6096	16.3219	43	28.6096		79.4429	9	17	17.3562	12.3219	6.67808		79.4429	9	57.6438	21.0342	24.6781	31.9658		79.4429	82.9315	46.7123	4.32192	43.9658	45.3219		79.4429	28.3562	30.3562	20	76.6438	12		79.4429	85.2192	96.6781	221.493	718.301
79.7739	29.3014	1	42	13	34.6507	23.6747	15	8	18		79.7739	47.3014	13.3253	42	24.3014		79.7739	9	16	16.3493	11.3253	6.67466		79.7739	8	58.6507	17.3493	23.6747	27.6507		79.7739	94.2774	45.024	4.32534	35.6507	42.6507		79.7739	25.3493	27.3493	19.3253	74.6507	10		79.7739	67.6027	90	174.096	729.983
80.1049	22.9863	1	45	10.3288	32.6575	21.6712	12	7.32877	17.3288		80.1049	45.3151	11.3288	41	20.3151		80.1049	8.67123	16	15.6712	10.3288	7.67123		80.1049	7	58.9863	13.6712	23.3425	23.6575		80.1049	105.63	44.0137	4.32877	28.6575	39.6575		80.1049	23.3425	24.3425	19	73.6575	8.67123		80.1049	54.9726	83	135.712	740.932
80.4359	18.6644	1	48	8.33219	30.6644	18.6678	10	7	17		80.4359	43.3288	10	39	16.9966		80.4359	8	16.6678	14.6678	9.33219	8.66781		80.4359	6.66781	57.9966	10.6678	22.6678	21.6644		80.4359	115.99	43.3356	4.33219	23.3322	36.6644		80.4359	21.3356	21.6678	18.3322	72.9966	7		80.4359	45.661	76	106.342	749.154
80.7669	13.6712	1	50	7	28.6712	16.6644	8	6.33562	17		80.7669	41.0069	8.33562	37.6644	14.6712		80.7669	7.66438	17	14.3288	8.33562	9.32877		80.7669	6	57.0069	8.66438	21.6644	19.3356		80.7669	125.021	43.3288	4.33562	18.6712	33.6712		80.7669	19.3288	19.6644	17.3356	72.6712	6		80.7669	39.3425	68.3356	84.9863	752.021
81.0979	10.339	1	52	5.33904	27.339	15	7	6	17		81.0979	38.0171	8	35.661	12.6781		81.0979	6.66096	18	13.661	7.33904	10.3219		81.0979	5	54.0171	6	20.661	17.6781		81.0979	131.051	43	4.33904	15.6781	30.339		81.0979	17.661	17.661	16.339	72.0171	5		81.0979	35.0171	61.339	70.6438	748.212
81.4289	8	1	52.3425	4	25.3425	14	6	6	18		81.4289	34.6849	7	33.6575	10.6849		81.4289	6	19	12.6575	6.34247	10.6575		81.4289	4.65753	50.6849	4.65753	20	16.3425		81.4289	135.082	43	4.34247	13.6849	26.6849		81.4289	15.6575	17	15.3425	71.3699	4.65753		81.4289	32.0274	55.3425	62.3151	734.767
81.7599	6	1	52	3	23.3459	13	5	5.34589	19.6541		81.7599	31.6918	6	31	9.34589		81.7599	5	20.3459	11.6541	5.34589	11.6541		81.7599	4	46.6918	3	19.6541	15.3459		81.7599	135.459	43	4.34589	12.3459	23.6918		81.7599	14.6541	16	13.3459	70.3836	4		81.7599	31.0377	49.3459	57.6541	711.034
82.091	4.34932	1	50.3493	3	22	12	4	5.34932	21		82.091	28.3493	6	28.6507	8.34931		82.091	4	20.3493	10.6507	5.34932	12.3014		82.091	4	41.6986	2	18.6507	14.3493		82.091	133.493	42	4.34932	11.3493	21.3493		82.091	13	16.3493	12.3493	68.7466	3		82.091	29.6986	44.3493	56.3493	676.685
82.422	4	1	48	2	20.3527	11	4	5.35274	22.6473		82.422	25.3527	6	26.6473	7.35274		82.422	3	21.3527	10.2945	4.35274	12.6473		82.422	3	37.7055	2	18	13.3527		82.422	129.175	41.3527	3.35274	10.7055	18.7055		82.422	12	17	10.3527	66.1164	3		82.422	28.7055	39.3527	56.7055	631.435
82.753	3	1.64384	44.3562	2	19.3562	11	3.35616	5.35616	24.6438		82.753	23	6	24	6.35616		82.753	2	21.3562	9.64384	4.35616	12.6438		82.753	3	33.3562	1	17	12.3562		82.753	122.205	40	3.35616	9.71233	17.7123		82.753	10.6438	17.7123	9.35616	63.4931	2.64384		82.753	27.7123	35.3562	57.4247	577.603
83.084	3	1.64041	40	1.35959	18.3596	10	3	5.35959	26.6404		83.084	20	6	21.6404	5.35959		83.084	2	20.7192	9.28082	4.35959	12.6404		83.084	3	29.7192	1	16.6404	11.3596		83.084	113.517	38	3	9.35959	16.7192		83.084	9.64041	18.7192	7.35959	60.1575	2		83.084	26.0788	32	58.4384	517.199
83.415	3	2	35.363	1	18.363	10	3	6	27.637		83.415	18	6.63699	19	4.36301		83.415	1	19.726	8.63699	4	11.637		83.415	3	27.363	1	16	11		83.415	103.541	36.637	2.36301	8.72603	16.726		83.415	8	20.726	6.36301	56.5411	2		83.415	25.089	29.363	59.4521	452.596
83.746	3	2	30.3664	1	17.3664	10	3	6.36644	28.6336		83.746	16.6336	7	16.6336	4		83.746	1	18.7329	8.63356	4	11.6336		83.746	2.36644	24.3664	0.366438	15	11		83.746	93.1986	34.6336	2.36644	8.36644	17.7329		83.746	7.63356	22.0993	5.36644	51.9315	2		83.746	23.7329	27	59.4658	386.082
84.077	4	2	25.3699	1	16.3699	9.63014	3	6.36986	29.6301		84.077	15.6301	7.63014	14.6301	3.36986		84.077	1	17.3699	9.26027	4	10.6301		84.077	2.36986	23.3699	0	15	11		84.077	82.8493	32.6301	2	7.73973	19.3699		84.077	6.63014	24.1096	4	47.589	2		84.077	21.7397	26	58.4795	322.288
84.408	4	2.62671	21	1	15.3733	9.62671	3	7	29.6267		84.408	14.2534	8.62671	12.6267	3		84.408	1	15.7466	9.62671	4	10		84.408	2.37329	22.3733	0	14	11.6267		84.408	72.8664	30.6267	2	7.37329	21.3733		84.408	6	25.1199	3.37329	42.613	1.62671		84.408	20.1199	25	55.8664	263.202
84.7391	5	2.62329	17	1	14.3767	9	3	7	28.6233		84.7391	13.2466	9.62329	10.6233	2.37671		84.7391	1	14.3767	9.62329	4	9.62329		84.7391	2.37671	21.3767	0	13	11.6233		84.7391	63.5069	28.2466	1.37671	7.37671	23.7534		84.7391	5	26.5068	2.37671	37.637	1.62329		84.7391	18.7534	25	53.5069	210.192
85.0701	5	2	13	1	13	9	2	7.38014	27.6199		85.0701	12.2397	10.6199	9	2		85.0701	1.61986	12.3801	10.6199	4	8.61986		85.0701	2.38014	21.3801	0	12.6199	12.6199		85.0701	55.5205	27.2397	1.38014	6.38014	26.3801		85.0701	5	27.5205	2	33.2808	1		85.0701	17.7603	25	49.5205	164.116
85.4011	6	2	10	1	11.3836	8.61644	2	7.38356	25.6164		85.4011	11.2329	11.6164	7	2		85.4011	2	11.3836	11.6164	4	7.61644		85.4011	2.38356	21	0	12	12.6164		85.4011	49.1507	25.2329	1	6.38356	29.3836		85.4011	4	28.1507	1.38356	27.9178	1		85.4011	16.7671	25	46.1507	126.096
85.7321	6	2	7.38699	1	10	8	2	7.38699	23.613		85.7321	10.613	12	6	2		85.7321	2.61301	9.38699	11.613	4	6.61301		85.7321	3	20.387	0	11	13.613		85.7321	43.774	24.226	1	6	32.387		85.7321	4	28.161	1	23.5479	1		85.7321	15.774	26	42.774	95.3562
86.0631	6	2	6	1	8.39041	8	2	7.39041	20.6096		86.0631	9.60959	13	5	2		86.0631	3	8.39041	12.6096	4	5.60959		86.0631	3	19.3904	0	10.6096	13.6096		86.0631	39.7808	22.8288	1	5.39041	34.3904		86.0631	3.60959	28.1712	1	19.5616	1		86.0631	15.7808	26	39.1712	71.8767
86.3941	6	2	4	1	7	7.60616	2	7.39384	18		86.3941	8.60616	13.6062	4	1.39384		86.3941	4	7	12.6062	4	4.60616		86.3941	3	18.3938	0	10.6062	14.2123		86.3941	36.7877	22.8185	1.60616	5.39384	36.3938		86.3941	3	27.1815	1	15.1815	1		86.3941	14.7877	26	36.7877	54.0308
86.7251	6	1.60274	3	0	6	7	2	7.39726	15		86.7251	7.60274	14	4	1.39726		86.7251	5	6	13	3	4		86.7251	3	16.3973	0	10.6027	14.2055		86.7251	34.7945	21.8082	2	5	37.3973		86.7251	3	25.7945	1	12.1918	1		86.7251	15.1918	26	34.3973	40.2055
87.0561	5	1.59932	3	0	5	7	2	7.40068	12.5993		87.0561	6.59932	14	3	1		87.0561	6	5	13.5993	3	3		87.0561	3	15.4007	0	10	13.5993		87.0561	33.4007	21.3973	2	4.40068	38.4007		87.0561	3	23.8014	1	9.80137	1		87.0561	15.8014	26	32.4007	30.5993
87.3872	5	1	2	0	4	6	2	8	10		87.3872	5.59589	14	3	1		87.3872	7.59589	4.40411	13	3	2		87.3872	3	13.4041	0	10	13.1918		87.3872	33	20.7877	2	4	37.8082		87.3872	3	21.8082	1	7.40411	1		87.3872	15.8082	26	31	24
87.7182	4	1	2	0	3	6	1.59247	8	8		87.7182	4.59247	14	3	1		87.7182	8.59247	4	13	2	2		87.7182	3	12.4075	0	10	12.5925		87.7182	32.4075	20.3699	2	3.40753	37.2226		87.7182	3	19.4075	1	5.40753	0.592466		87.7182	16.4075	25	29.4075	19
88.0492	4	1	2	0	3	6	1	9	6.58904		88.0492	4	14	3	1		88.0492	9	3	12	2	1		88.0492	3	11	0	10	11.589		88.0492	32	19.7671	2	3	35.8219		88.0492	3	17	1	4.41096	0.589041		88.0492	16.8219	25	28	15.411
88.3802	3	1	2	0	2	6	1	9.41438	5		88.3802	3.58562	13.4144	3	1		88.3802	10	3	11	1.58562	1		88.3802	3	9.41438	0	10	9.58562		88.3802	32	18.7568	2	2.41438	33.8288		88.3802	3	14.4144	1	3.41438	0.585616		88.3802	17.8288	24	26.4144	13
88.7112	3	1	2	0	2	6	1	10	4		88.7112	3	13	3	1		88.7112	10.5822	3	10.4178	1	1		88.7112	3	8.41781	0	9.58219	8.58219		88.7112	31	17.7466	2	2	31.2534		88.7112	3	12.4178	1	3	0.582192		88.7112	18.8356	23.4178	24.4178	11.4178
89.0422	2	1	2	0	2	6	1	11	3		89.0422	3	12.4212	3	1		89.0422	10.5788	3	9	1	0		89.0422	3	7.42123	0	9.57877	7.57877		89.0422	30.5788	17.1575	2	1.42123	28.2637		89.0422	2.57877	10	1	2	0.578767		89.0422	20.4212	23	22.4212	10
89.3732	2	1	2	0	2	6	1	12	2		89.3732	2.57534	11.4247	3	1		89.3732	10	2.57534	8	1	0		89.3732	3	7	0	9	6.57534		89.3732	29.5753	16.1507	1.57534	1	25.8493		89.3732	2	9	1	2	0		89.3732	22	23	20	9.42466
89.7042	1	1.42808	2	0	2	6	1	12.4281	2		89.7042	3	11.4281	3	1		89.7042	10	2	7	1	0		89.7042	2.42808	6.42808	0	9	5.57192		89.7042	28.5719	15.1438	1.57192	1	23.2842		89.7042	2	7.57192	1	2	0		89.7042	23.4281	22.4281	17.4281	8.42808
90.0352	1	1.43151	2	0	2	7	1	13	1.43151		90.0352	3	11	3	0.431507		90.0352	9	2	6	0	0		90.0352	2	6	0	8.56849	4.56849		90.0352	27.5685	13.5685	1	1	20.863		90.0352	2	6.56849	1	2	0		90.0352	25	22	15	8
90.3663	1	1	2	0	2	7	1	13.4349	1		90.3663	3.56507	11	3	0.434932		90.3663	8	2	5	0	0		90.3663	2	6	0	8	3.56507		90.3663	26.5651	12.1301	1	0	18.8699		90.3663	2	6	1	2	0		90.3663	27	22	12.4349	7.43493
90.6973	1	1	2	0	3	7	1	14	1		90.6973	4	11.4384	2.43836	0		90.6973	7	2	4	0	0		90.6973	2	6	0	8	3		90.6973	25.5616	11.1233	1	0	16.8767		90.6973	1	5.56164	1	2	0		90.6973	29	21	10.4384	6.43836
91.0283	1	1	2	0	3	7	1	14	1		91.0283	5.55822	11.4418	2	0		91.0283	6	2	3.44178	0	0		91.0283	2	6	0	7.55822	2.55822		91.0283	24	9.55822	1	0	15.8836		91.0283	1	5	1	2	0		91.0283	31.5582	21	8.44178	6.44178
91.3593	1	1	2	0	3	7.44521	1	14	1		91.3593	6.55479	12.4452	2	0		91.3593	5	2	3	0	0		91.3593	2	6	0	7.55479	2		91.3593	22.5548	8.55479	1	0	13.8904		91.3593	1	5	1	2	0.554795		91.3593	33.5548	20	7	5.44521
91.6903	1.44863	1	2	0	3	7	1	14	1		91.6903	8.10274	13.4486	2	0		91.6903	4	2	2	0	0		91.6903	2	6.44863	0	7.55137	2		91.6903	21	7.55137	1	0	13.8973		91.6903	1	5	1	2	0.55137		91.6903	36.5514	20	6	5.44863
92.0213	2	1	2	0	3	7	1	13	0		92.0213	10.0959	15	2	0		92.0213	3	2	2	0	0		92.0213	2	7.45205	0	7	2		92.0213	19.5479	6.54795	1	0	12.9041		92.0213	1	5	1	2	0.547945		92.0213	39.0959	19.5479	5.45205	4.45205
92.3523	2	1	2	0	3	7	1	13	0		92.3523	12.089	16	2	0		92.3523	3	2	2	0	0		92.3523	2	8.45548	0	7	2		92.3523	18	5.54452	1	0	12.911		92.3523	0.544521	4.54452	2	2	1		92.3523	42.5445	19.5445	5	4.45548
92.6833	2	1	2	0	3	6	1	12	0		92.6833	13.6233	17	2	0		92.6833	2	1	1.4589	0	0		92.6833	2	10	0	6.5411	1.5411		92.6833	16	4.5411	1	0	12.4589		92.6833	0	4.5411	2	2	1		92.6833	46.0822	19.5411	5	3.4589
93.0144	3	1	2	0	3	6	1	11	0		93.0144	15.613	18	2	0		93.0144	2	1	1	0	0		93.0144	2	12	0	6.53767	2		93.0144	14	3.53767	0.537671	0	11.9247		93.0144	0	4.53767	2	2	1		93.0144	50.5377	19.5377	5	3.46233
93.3454	3	1	2	0	3	5	1	10	0		93.3454	17.6027	18	2	0		93.3454	1	1	1	0	0		93.3454	2	14	0	6	2		93.3454	12	3	0	0	11.9315		93.3454	0	4	3	2	1		93.3454	55.0685	20.5342	6	3.46575
93.6764	3	1	2	0	3	4	1	9	0		93.6764	19.5925	18	2	1		93.6764	1	1	1	0	0		93.6764	2	16.5308	0	6	2		93.6764	10	2	0	0	11.9384		93.6764	0	4	3	2	1		93.6764	59.0616	20.5308	6	3
94.0074	3	0	2	0	2.4726	4	1	8	0		94.0074	21.1096	18	2	1		94.0074	1	1	1	0	0		94.0074	2	19.5274	0	5	2		94.0074	8	2	0	0	11.9452		94.0074	0	3.5274	4	1.5274	1		94.0074	63.0548	20.5274	7	2.4726
94.3384	3.47603	0	2	0	2.47603	3	1	7	0		94.3384	23.0959	17	2	1		94.3384	1	1	1	0	0		94.3384	2	23.5719	0	5	2		94.3384	6	1.52397	0	0	11.9521		94.3384	0	3	5	1	1		94.3384	66.5719	20.524	7	2.47603
94.6694	3.47945	0	2	0	2	3	1	6	0		94.6694	24.5616	16	2	1		94.6694	1	1.47945	1	0	0		94.6694	1.52055	27.0822	0	4.52055	2		94.6694	5	1	0	0	10.9589		94.6694	0	3	6	1	1		94.6694	68.5616	20.0411	8	2.47945
95.0004	3.48288	0	2	0	2	2	1	5	0		95.0004	27.5514	14.5171	2	2		95.0004	0	2	1.48288	0	0		95.0004	1.51712	31.5856	0	4	2		95.0004	4	1	0	0	10.9658		95.0004	0	2.51712	7	1	1		95.0004	70.0685	19.0342	8	2.48288
95.3314	3	0	2	0	1.4863	2	1	4	0		95.3314	30.0274	13	2	2.5137		95.3314	0	2	2	0	0		95.3314	1	36.0822	0	4	2		95.3314	3	1	0	0	9.9726		95.3314	1	2.5137	8	1	1		95.3314	69.0548	17.5137	8	2.4863
95.6625	3	0	2	0	1	2	1	3	0		95.6625	33.0205	11.5103	2	3		95.6625	0	2	2	0	0		95.6625	1	41.0822	0	3	2		95.6625	2	0.510274	0	0	9.97945		95.6625	1	2	9	1	1		95.6625	67.5514	16.0205	8	2
95.9935	3	0	2	0	1	2	1	3	0		95.9935	37.5069	10	2	4		95.9935	0	2	2	0	0		95.9935	1	45.5616	0	3	2		95.9935	1	0.506849	0	0	8.9863		95.9935	1	2	9.50685	1	1		95.9935	64.5342	14.5068	7	2
96.3245	2.49658	0	2	0	1	1	1	2	0		96.3245	42.5034	8.50342	2	4.50342		96.3245	0	2.50342	2.49658	0	0		96.3245	1	50.0342	0	3	2		96.3245	1	0.503425	0	0	8.49658		96.3245	1	2	10	0	1		96.3245	60.5171	12.5034	7	2
96.6555	2	0	2	0	1	1	1	2	0		96.6555	49	7.5	2	5.5		96.6555	0	3	3	0	0		96.6555	1	53.5	0	3	2		96.6555	1	0.5	0	0	8		96.6555	1.5	2	10	0	1		96.6555	55.5	10.5	6	2
[truncated: 24 more columns]

## Sheet: Fig2D
Intensity plot profiles: pCLV3:mCherry-NLS
	noT											Mock_D1						DEX_D1							Mock_D2							DEX_D2							Mock_D3							DEX_D3
Distance	#1	#2	#3	#4	#5	#6	#7	#8	#9		Distance	#1	#2	#3	#4		Distance	#1	#2	#3	#4	#5		Distance	#1	#2	#3	#4	#5		Distance	#1	#2	#3	#4	#5		Distance	#1	#2	#3	#4	#5		Distance	#1	#2	#3	#4
0	18	18	40	56.5	30.5	3.5	3	1	12.5		0	0	61.5	32.5	19.5		0	23.5	23.5	50	24	28.5		0	18.5	27.5	0	24	4		0	23	44	10	21	40.5		0	12	1	26	10.5	24.5		0	18.5	33	37.5	16
0.331012	18.5034	19	39	59.0069	32	3.50342	3.50342	1	13.4966		0.331012	0	66.5103	34.9931	20.9932		0.331012	24.4966	25.5034	52.4829	25.4966	33		0.331012	20	29.5034	0	25.4966	4.49658		0.331012	25.0068	48.5034	10.4966	22	43.5103		0.331012	13	2	26.4966	11.4966	25.5034		0.331012	19.4966	41	41	17.4966
0.662024	18.5068	21	39	60.5205	34	3.50685	4	1	13.4932		0.662024	0	70.0274	36.9863	22.4932		0.662024	26.4932	28.5068	53.9726	27	37		0.662024	22	32.5069	0	27.4932	5		0.662024	27.5205	52.5069	11	24	46.0137		0.662024	13	2.49315	27	12.4932	26.5068		0.662024	20	51	45.4931	18.9863
0.993036	19.5103	23	38.5103	62.0205	36.4897	4	4.51027	1	14.4897		0.993036	1	73.0411	38.9795	24.9795		0.993036	27.4897	32.5103	55.9589	28.4897	42.4897		0.993036	23	35.5103	0	30.4897	6		0.993036	31.0411	57.0205	12	26	49.0205		0.993036	13	3.48973	29	13.4897	29.0205		0.993036	21.4897	61.9795	49.4897	20.9795
1.32405	20.5411	25	38.5137	63.0274	39	4	5	1	15.4863		1.32405	1	75.0548	40.9726	27.4863		1.32405	29.4863	36.5137	57.4589	30	48.4863		1.32405	25	37.5137	0	34	7		1.32405	35.0548	61.5137	13	28	50.5137		1.32405	13	4.4863	30	14.4863	31.0274		1.32405	22.4863	74.4863	54.4863	22.9726
1.65506	21.5514	27.4829	39.5171	64.0342	42	4	5.51712	1.51712	16		1.65506	2	76.0685	42.9658	29.9658		1.65506	32	42.5171	58.9315	32.4829	54.4829		1.65506	27.4829	40.5171	0	38.4829	8		1.65506	39.0685	66.0342	14.5171	30	52.5171		1.65506	13.4829	6	32	16	34.0342		1.65506	24.4829	87.9658	59.4829	25.4829
1.98607	22.5616	31	40.5205	64.0411	45	4	5.52055	2	17		1.98607	2	75.5616	44.4384	32.4795		1.98607	34.4795	48.5205	60.9589	35	60.9589		1.98607	30	43.5205	0	43.5205	9		1.98607	44.0822	70.0411	16	32.4795	53.5205		1.98607	14.4795	7.47945	35	17	37.5616		1.98607	26.4795	102.438	64.5205	28.4795
2.31708	23.5719	34.476	42.0479	64.524	47	4	5.52397	2	19		2.31708	3	74.0959	45.9521	35.476		2.31708	38	55.524	62.9521	37.476	66.9521		2.31708	33	47.524	0	49.524	9.47603		2.31708	49.6199	73.0479	17	34.476	54		2.31708	14.476	9.47603	37	18.476	42.0959		2.31708	28.9521	116.904	69.524	31.476
2.6481	24.5822	38.9452	44.0548	64.5274	50	4	6.5274	3	20.5274		2.6481	4	71.1096	47.4178	37.9452		2.6481	41	63.0548	65.9452	40	72.8904		2.6481	36	50.5274	0	55.5274	10		2.6481	54.637	76.0548	18.5274	36.4726	55		2.6481	15.4726	11.4726	40	19.4726	46.1096		2.6481	31.9452	131.363	74.5274	34.4726
2.97911	26.0616	43.9384	46.5308	64.5308	53	4	6.53082	3.53082	22.5308		2.97911	5	67.5925	48.9384	40.4692		2.97911	45	70.0616	69.4692	43	77.8767		2.97911	39	54.5308	0	62.5308	11		2.97911	59.1849	78.5308	19.5308	37.4692	55		2.97911	16.4692	13.9384	42.5308	21	50.1233		2.97911	34.9384	144.815	80.0616	37.9384
3.31012	27.0685	49.3973	49.5342	65	56	4.53425	6.53425	4	25.5342		3.31012	7	63.6027	49.9315	43.4658		3.31012	49	78.0685	74	46.4658	82.3288		3.31012	42.4658	58.5342	0	70.0685	12		3.31012	63.6712	80.5342	20	39.4658	54.4658		3.31012	17.4658	16.4658	44.5342	22	54.137		3.31012	37.9315	157.26	84.6027	41.4658
3.64113	28.0753	55.387	53.0753	65.5377	59	5	6.53767	5.53767	28.0753		3.64113	8.53767	59.613	51.387	45.4623		3.64113	52.5377	84.613	79	49.4623	85.3116		3.64113	45.4623	62.5377	0	77.613	13		3.64113	66.6884	82.5377	20	40.4623	54		3.64113	17.4623	18.4623	46	23	57.6884		3.64113	40.9247	167.699	89.613	44.9247
3.97214	30.0822	62.3767	57.0822	66	62	5	6.5411	6.5411	31.0822		3.97214	10.5411	55.6233	52.9178	48.4589		3.97214	55.5411	90.6233	85	53.4589	87.2945		3.97214	48.4589	67.5411	0	84.6233	14		3.97214	68.7055	85	20	41.4589	54		3.97214	18.4589	20.4589	47.5411	24	60.7055		3.97214	44.9178	177.13	95.1644	48.9178
4.30316	31.5445	68.3664	61.5445	67	66	5	6.54452	7.54452	34.089		4.30316	12.5445	51.6336	54.911	50.4555		4.30316	58.5445	96.1781	91	56.4555	88.2774		4.30316	50.911	72	0	91.6336	15		4.30316	70.1781	87.4555	20	42.911	53.5445		4.30316	18.911	21.911	48	25.5445	62.7226		4.30316	49.3664	185.555	100.723	52.911
4.63417	34	75.3562	67.0959	68.5479	70	5	6.54795	8.54795	37.6438		4.63417	15	48.0959	56.3562	53.4521		4.63417	60.5479	100.192	98	59.4521	88.2603		4.63417	53.4521	76.5479	0	98.1918	16		4.63417	70.7397	91.4521	19.5479	44.4521	52.5479		4.63417	19.4521	23.9041	49	27	64.7397		4.63417	54.3562	191.973	106.74	57.9041
4.96518	36	82.3459	74.1027	70	74	5	6.55137	10.5514	40.6541		4.96518	18	45.1027	58.3459	56.4486		4.96518	62.5514	103.205	105	62.8973	87.7945		4.96518	55.4486	81	0.44863	103.757	18		4.96518	70.2055	96.4486	19	45.8973	53.1027		4.96518	19.4486	24.8973	49	28.5514	65.7569		4.96518	59.8973	197.935	113.308	62.3459
5.29619	38.4452	89.3356	82.1096	72	79	5	6.55479	11.5548	42.6644		5.29619	21.5548	43.1096	59.8904	60		5.29619	64.5548	106.219	112	65.8904	87.3356		5.29619	57.4452	85	0.445205	108.774	20		5.29619	68.6644	103.336	18	47.8904	53.1096		5.29619	19.8904	25.8904	49	29.5548	66.2192		5.29619	66.3356	203.342	120.774	67.7808
5.6272	40.8836	94.8836	91.1164	74	83	5	6.55822	13.5582	44.2329		5.6272	25.5582	41.1164	61.8836	64.4418		5.6272	66.5582	107.791	119	68.8836	86.8836		5.6272	58.4418	89	1	113.349	23.4418		5.6272	67.1164	112.325	18	50.8836	53.6747		5.6272	20.4418	26.8836	50	31.5582	67.2329		5.6272	73.8836	208.301	129.349	73.7671
5.95822	43.8767	100.877	100.685	75.5616	87	6	7	14.5616	45.2466		5.95822	30	40.5616	63.8767	69		5.95822	68.5616	108.808	126	71.4384	86.4384		5.95822	60	92	1	116.37	27		5.95822	65.1233	122.315	17.4384	53.8767	54.6849		5.95822	20.4384	27.8767	51.4384	33.5616	67.6849		5.95822	81.8767	213.26	138.37	80.1918
6.28923	47.3048	105.435	110.695	77	90	6	7	15.5651	45.6952		6.28923	35.5651	40.5651	65.8699	74.4349		6.28923	70.5651	110.26	133	73.8699	87.5651		6.28923	61	95	1	119.39	31.4349		6.28923	63.5651	134.305	17.4349	58.3048	55.6952		6.28923	21.4349	28.8699	54.8699	35.5651	68.6952		6.28923	89.8699	218.219	149.39	86.6096
6.62024	49.726	109	120.705	79.5685	92.5685	7	7.56849	17	45.7055		6.62024	41.5685	40.5685	67.863	80.4315		6.62024	73	111.274	139.432	76.4315	88.7055		6.62024	63	97	1.43151	121.411	35.863		6.62024	62	146.726	17.4315	64.2945	56.7055		6.62024	21.4315	29.863	58.2945	38.5685	69.7055		6.62024	98.863	223.747	161.411	93.589
6.95125	52.7123	111.572	129.716	82	94.5719	8	7.57192	18.5719	44.7158		6.95125	48.5719	42	69.8562	86.4281		6.95125	75.5719	112.86	146	78.8562	91.8596		6.95125	64	98.5719	2	123.432	41.8562		6.95125	61	159.284	18	70.7123	58.7158		6.95125	22.4281	30.8562	63.7123	41.5719	70.7158		6.95125	107.856	228.709	173.86	100.425
7.28226	56.1233	113.151	137.726	84.5753	95.5753	9	7.57534	19.4247	44.1507		7.28226	56.5753	43.5753	72.4247	92.4247		7.28226	79	114.301	152.425	81.4247	95.4521		7.28226	65.5753	100	2.42466	125.452	47.274		7.28226	61.4247	172.274	19	77.6986	60.726		7.28226	23.4247	31.8493	70.6986	44.5753	72.726		7.28226	117.849	234.247	187.877	107.397
7.61327	59.1062	113.579	143.736	88.5788	95	10.4212	7.57877	20.4212	43.1575		7.61327	66.1575	46	74.4212	99.4212		7.61327	82	115.315	159.421	83.8425	100.051		7.61327	68.1575	100.579	3.42123	127.473	53.2637		7.61327	62.4212	183.842	20	85.6849	62.1575		7.61327	25	33.8425	78.1062	48.1575	74.7363		7.61327	128.421	239.37	202.315	114.37
7.94429	62.089	113.164	147.747	92.5822	94	12	7.58219	21.4178	43.1644		7.94429	75.7466	49	77	105.836		7.94429	85	116.747	166.418	86.8356	104.658		7.94429	70.1644	101.582	4.41781	129.493	60.2534		7.94429	65.4178	193.418	21.4178	93.089	64.1644		7.94429	27	35.8356	86.5069	51.5822	76.7466		7.94429	139.418	245.925	216.329	121.342
8.2753	66.0719	112.171	149.757	98.1712	93	15	8.58562	22.4144	42.5856		8.2753	85.7569	52.5856	79	112.414		8.2753	87.5856	117.757	173.829	89.4144	109.685		8.2753	72.7569	103	5.41438	131.928	66.6575		8.2753	69.4144	201.586	23.4144	100.658	66.5856		8.2753	29.4144	38.8288	95.4863	55.1712	79.7569		8.2753	152.414	252.486	231.342	127.315
8.60631	69.4658	110.178	150.178	105.178	91	17	9	22.8219	43		8.60631	96.7671	55.589	81	117.822		8.60631	89.589	118.178	180.822	91.8219	114.301		8.60631	76.3562	104.589	7.41096	134.945	72.6438		8.60631	74.8219	207.589	25.411	107.644	68.589		8.60631	32	41.8219	103.877	59.1781	83.3562		8.60631	166.822	261.233	245.767	134.288
8.93732	73.0377	108.185	149.185	112.777	89.4075	20	10	22.8151	44		8.93732	107.37	60.1849	82.5925	123.815		8.93732	90.5925	118.777	188.408	93.8151	118.332		8.93732	79.3699	106.592	9.40753	137.37	78.0377		8.93732	81.8151	211.777	28.4075	113.63	71.5925		8.93732	35.4075	45.2226	111.853	62.7774	87.7774		8.93732	183.408	271.223	259.185	140.853
9.26833	77.0205	106.192	147.192	121.788	88.8082	23.4041	11.5959	22.8082	46		9.26833	117.979	64.1918	84.5959	128.808		9.26833	91.5959	119.192	195.404	95.8082	121.767		9.26833	83.3836	109.596	11.4041	140.788	83.0205		9.26833	91.2123	214.384	32	118.616	74.5959		9.26833	39.4041	49.2123	119.425	66.7877	92.3836		9.26833	202.404	283.404	272.192	148.829
9.59935	81.4041	105.199	145.599	129.798	88.8014	27	13.5993	22.8014	48		9.59935	127.997	67.7979	85.5993	133.202		9.59935	92.1986	119.199	202.401	96.8014	124.795		9.59935	86.3973	113	14.4007	143.798	87.4041		9.59935	101.603	215.397	36.4007	123.202	78		9.59935	43.8014	54.2021	125.404	70.3973	98.3973		9.59935	223.401	298	283.199	157.404
9.93036	85.3836	104.603	145	138.411	89.7945	30.3973	16.6027	22.7945	50.3973		9.93036	136.411	71.8082	86.6027	137.192		9.93036	93.2055	120.205	209.397	97.7945	128.219		9.93036	90.411	117	17.3973	147.205	91.3836		9.93036	113.589	217.014	41.3973	126.795	83		9.93036	49.1918	59.1918	130.986	74.411	104.411		9.93036	247	313.603	293.205	168.384
10.2614	89.7569	104.606	146	145.425	92.1815	34	19.6062	22.3938	53		10.2614	144.031	74.8185	88.6062	140.788		10.2614	94.6062	121.818	216	98.7877	131.243		10.2614	94.4247	122.606	20.7877	150.212	95.363		10.2614	126.969	219.031	47.7877	130.788	88		10.2614	55.1815	65.1815	134.575	77.4247	112.031		10.2614	271.606	330.606	301.606	182.363
10.5924	94.3425	105.61	148.39	151.438	96.1712	37	23.6096	21.7808	55.3904		10.5924	150.438	77.4384	89.6096	143.781		10.5924	97.2192	124.219	223	100.39	134.658		10.5924	97.4384	127.61	25.7808	153	99.3425		10.5924	140.952	223.048	55.1712	134.39	95		10.5924	61.5616	70.5616	137.171	80.0479	119.658		10.5924	295.61	348	308.61	199.123
10.9234	99.7089	108.613	152.774	155.452	101.774	40	28	21.387	58.387		10.9234	154.839	79.839	91.613	146.774		10.9234	102.226	127.839	230.613	101.774	139.291		10.9234	99.4521	134.226	30.774	156	103.935		10.9234	155.322	229.678	65.161	140	103.387		10.9234	68.5479	77.5479	138.774	83.0651	127.678		10.9234	319.226	365	315	220.483
11.2544	105.685	111.616	159.151	157.849	107.767	43	32.6164	21.3836	61.3836		11.2544	158.849	80.8493	94.6164	149.151		11.2544	108.849	132.849	237.616	103.384	143.699		11.2544	101.466	141.233	36.1507	158	108.918		11.2544	169.685	239.466	76.9178	146.616	114		11.2544	75.9178	83.9178	139.384	85.0822	136.315		11.2544	339.849	380.384	322	245.836
11.5854	112.661	114.62	166.521	159.86	114.76	45	37.6199	21.3801	64.3801		11.5854	162.24	82.2397	98	152.76		11.5854	117.86	139.099	244.86	106.38	150.099		11.5854	103.479	147.86	43.1404	161	114.901		11.5854	182.661	254.479	89.661	156.24	125.62		11.5854	84.2808	89.9007	140	87.0993	144.959		11.5854	356.479	392.76	329.38	275.562
11.9164	121.014	118.623	174.884	160.87	122.753	46.3767	42.6233	22	67.3767		11.9164	165	83.2466	103	155.753		11.9164	128.493	146.116	252.493	110	157.116		11.9164	103.87	155.116	50.1301	164.623	122.507		11.9164	195.014	273.493	105.014	167.87	138.623		11.9164	92.637	96.2603	141	89.1164	154.233		11.9164	369.116	403.13	338.753	309.274
12.2474	130.613	122.627	182.866	162.253	130.373	47.3733	46.6267	23	69.3733		12.2474	168	83.6267	110	160.373		12.2474	141.507	153.134	259.507	114.627	164.507		12.2474	103.88	162.76	57.4931	168.627	132.12		12.2474	205.36	297.88	121.733	182.134	153.627		12.2474	101.613	102.24	141.627	91.1336	163.894		12.2474	376.134	412.493	350.493	346.346
12.5785	141.589	125.63	190.219	164.63	137.37	47.3699	50.6301	24	72.7397		12.5785	171	84	118	166		12.5785	156.781	161.151	266.521	120.63	172.89		12.5785	103.89	170.411	65.4795	173.26	143.74		12.5785	214.329	327.26	139.438	198.781	168.26		12.5785	110.959	108.219	142.63	93.5205	173.562		12.5785	378.151	418.849	365.219	385.027
12.9095	154.199	128.267	197.199	170	144.366	47.7329	53.6336	26	75.7329		12.9095	175	85	128	173.634		12.9095	172.801	168.168	273.534	128.267	181.267		12.9095	103.901	179.068	73.8322	179.267	157.366		12.9095	221.298	361.267	158.13	217.435	183.267		12.9095	120.932	114.832	144.634	95.9007	183.603		12.9095	375.801	424.832	383.565	425.329
13.2405	167.178	130.637	203.178	178.363	150	47.726	56	28	78.726		13.2405	179.363	86.363	140.637	182.637		13.2405	188.459	174.548	279.548	137.274	189		13.2405	104.911	188.37	81.8151	186.548	174		13.2405	227.267	399.274	176.445	236.459	197.274		13.2405	131.541	120.815	147.637	98.911	194.644		13.2405	370.822	430.815	405.63	463.623
13.5715	181.798	132.281	207.517	190.079	154	47.7192	58	30	83.0788		13.5715	185	89.3596	154.281	193.921		13.5715	203.483	179.921	285.562	147.921	197.36		13.5715	105.921	198.045	89.1575	194.562	193.281		13.5715	232.877	439.921	194.113	255.764	210.281		13.5715	141.517	127.798	151.64	102.64	205.685		13.5715	362.842	436.798	432.315	500.911
13.9025	196.425	133.288	212.137	206.425	157	48.3562	59.6438	33	87.0685		13.9025	191	92.3562	168.932	206.932		13.9025	217.151	184.288	291.932	160.932	204.068		13.9025	108.932	209.726	96.137	202.575	214.575		13.9025	238.849	481.575	211.411	273.795	221.288		13.9025	152.137	135.425	156	107.644	216.726		13.9025	354.863	444.781	461.986	535.123
14.2335	210.705	134.295	215.764	226.116	159.647	48.7055	60.6473	36	92.411		14.2335	197.353	96.7055	185.236	221.589		14.2335	229.178	188.295	297.295	176.589	210.411		14.2335	113.295	221.767	102.116	211.236	237.589		14.2335	246.116	523.884	226.702	289.178	229.647		14.2335	162.764	144.705	161.647	113	228.767		14.2335	347.884	454.411	494.291	564.702
14.5645	224	135.301	220.747	249.445	161.301	49.6986	61.6507	40	97.7466		14.5645	204	101.699	202.555	239.253		14.5645	238.856	190.651	303.651	193.253	215.096		14.5645	120.301	234.808	107.747	219.603	261.904		14.5645	254.747	564.206	240.637	301.856	235.651		14.5645	172.397	155.349	168.651	120.349	240.158		14.5645	343.253	465.048	528.938	590.589
14.8955	237.308	136.308	226.384	276.113	162.962	51.6918	64.3082	43.3459	103.729		14.8955	211	107.692	218.887	256.925		14.8955	245.887	192.654	310.346	212.925	220.421		14.8955	129.308	249.195	112.384	227.271	286.233		14.8955	266.038	601.541	253.264	311.233	241		14.8955	182.038	167.654	175.654	128.346	253.195		14.8955	342.271	477.384	565.226	612.497
15.2265	247.973	138.973	234.37	303.425	164.63	53.6849	67.3151	48	110.055		15.2265	218.658	115.685	236.233	275.945		15.2265	250.918	195	317.685	233.945	224.082		15.2265	140.315	263.575	116.37	234.63	309.26		15.2265	280	635.89	264.192	316.603	245		15.2265	190.685	181.63	184.658	137.027	266.233		15.2265	344.945	491.37	602.507	630.082
15.5576	257.966	141.983	244.017	331.068	167.305	56.339	71.3219	52.6781	117.373		15.5576	225.661	125.339	252.932	295.627		15.5576	254.949	198	325.356	256.288	228.051		15.5576	154.322	277.949	120.017	240.983	330.949		15.5576	296.322	666.253	274.459	319.966	248.339		15.5576	199	197.627	194.322	147.356	280.61		15.5576	352.305	506.017	638.442	645.356
15.8886	266.651	146.658	256.007	358.363	170.986	59.3356	76.3288	58.3356	124.685		15.8886	233	136.336	268.637	314.651		15.8886	257.644	202.664	333.349	278.979	231.356		15.8886	170.329	291.315	123.007	247.329	349.644		15.8886	314.986	692.63	283.384	320.322	253		15.8886	206.664	214.644	205.329	158.678	295.979		15.8886	364.986	521.678	673.377	658.336
16.2196	275.01	152.339	270.997	382.983	175.675	62.6644	83.0034	64.6644	131.99		16.2196	241.668	148.332	284.017	332.342		16.2196	260.678	208.668	341.658	301.678	235.322		16.2196	188.336	303.675	126.664	254.668	364.678		16.2196	334.342	715.021	292.64	320.671	258.332		16.2196	213.003	232.682	217.336	171.325	313.678		16.2196	382.007	537.325	706.312	670.003
16.5506	282.712	159.356	288.329	405.932	181.027	66.6575	91.6849	70.9863	138.959		16.5506	251	162	298.068	348.37		16.5506	264.384	216.342	350.616	322.384	240.288		16.5506	208.342	313.356	129.658	262.671	376.041		16.5506	353.384	734.082	300.562	320.014	266		16.5506	219.014	251.068	231.342	184.63	332.712		16.5506	404.027	554.63	736.589	681.027
16.8816	290.421	168.048	307.325	425.555	187.723	70.6507	99.6986	77.976	145.928		16.8816	262.675	177	312.12	362.397		16.8816	268.747	227.024	359.904	341.096	245.579		16.8816	229.349	321.024	134.325	272.325	384.072		16.8816	372.771	750.493	309.158	321.675	275.675		16.8816	224.373	268.469	246.349	199.253	352.747		16.8816	430.048	571.579	763.88	693.397
17.2126	299.137	177.39	328.678	443.185	194.747	75.6438	109.39	84.9658	152.897		17.2126	276	194	325.171	374.425		17.2126	274.459	238.034	369.507	357.815	252.863		17.2126	252.034	326.356	138.644	284.322	388.425		17.2126	390.171	765.24	317.082	326	287.678		17.2126	229.39	284.884	262.678	214.863	373.459		17.2126	460.747	590.185	787.863	707.103
17.5436	307.541	188.408	350.682	457.503	201.771	80.637	118.408	92.274	159.548		17.5436	292	213	339.541	384.452		17.5436	282.178	250.726	381.777	370.86	261.14		17.5436	274.726	329	144.318	298.637	390.771		17.5436	406.223	777.312	326.007	333.318	301.363		17.5436	234.089	299.63	280.363	231.459	393.497		17.5436	494.089	609.777	808.185	723.134
17.8746	316.589	200.425	374.74	469.836	209.11	85.6301	127.425	100.26	165.521		17.8746	310	234.315	353.904	391.795		17.8746	291.219	264.425	395.356	380.904	272.411		17.8746	298.74	329.63	150.63	315.63	391.425		17.8746	420.959	789.068	335.301	343.63	316.74		17.8746	239.11	313.014	298.685	249.726	412.219		17.8746	531.11	630.356	825.575	741.479
18.2057	324.637	212.442	399.13	480.87	217.13	91.6233	136.442	107.558	172.182		18.2057	330.312	257.312	368.572	397.818		18.2057	301.26	278.13	412.61	387.949	284.986		18.2057	322.442	328.935	157.623	334.935	392.065		18.2057	434.637	800.144	346.61	356.935	333.753		18.2057	244.442	325.079	316.688	269.986	428.949		18.2057	571.13	651.544	839.312	761.13
18.5367	333.377	225.459	424.151	491.925	225.459	98.6164	145.459	115.233	179.158		18.5367	352.308	283.308	385.226	403.842		18.5367	312.301	291.534	434.164	391.993	300.24		18.5367	346.151	327.925	166.616	354.925	392.692		18.5367	448.993	810.527	359.932	373.233	352.151		18.5367	250.459	334.76	334.692	292.24	442.993		18.5367	613.151	673.781	851.075	782.767
18.8677	340.428	236.781	450.257	502	235.476	105.914	153.476	123.914	187.134		18.8677	375.305	310.61	402.866	409.866		18.8677	324.342	304.562	461.096	394.342	317.791		18.8677	369.171	327.914	175.914	375.219	394.305		18.8677	462.952	822.294	375.962	389.524	372.562		18.8677	258.781	344.428	350.695	317.486	454.733		18.8677	655.476	696.315	860.866	806.39
19.1987	347.479	248.096	476.986	513.794	246.795	113.904	161.795	132.904	196.11		19.1987	397.301	338.904	421.493	417.192		19.1987	337.685	317.288	492.63	396.384	337.329		19.1987	392.192	328.205	185.904	395.205	397.904		19.1987	478.89	836.37	396.014	406.808	395.288		19.1987	269.795	353.384	365.699	346.425	463.781		19.1987	699.096	718.534	870.986	830
19.5297	352.829	257.702	503.723	525.616	259.808	122.894	170.106	141.596	207.788		19.5297	419.298	368.596	440.702	425.51		19.5297	353.021	330.021	529.555	398.021	357.853		19.5297	414.212	330.894	198.192	413.49	403.49		19.5297	497.106	854.147	420.086	423.788	421.021		19.5297	283.808	361.616	377.702	379.767	472.127		19.5297	741.404	741.151	880.829	853.298
19.8607	357.171	266	530.877	538.055	275.822	132.884	178.705	151.589	220.767		19.8607	439.295	396.884	460.295	436.822		19.8607	370.644	343.76	570.068	401.349	380.363		19.8607	436.233	335.589	211.884	431.473	412.062		19.8607	517.294	875.932	449.178	439.473	451.76		19.8607	302.822	370.822	387.705	417.123	481.171		19.8607	783	762.363	892.993	876.589
20.1917	361.798	272.291	556.925	551.507	294.545	144.873	188.291	162.291	235.747		20.1917	457.291	423.582	480.164	450.127		20.1917	389.253	359.507	612.986	407.671	404.568		20.1917	458.253	344.291	227.164	447.747	423.911		20.1917	539.456	903.014	481.582	453.747	488.216		20.1917	326.836	380.709	396	459.493	492.925		20.1917	821.582	783.695	906.469	898.291
20.5227	366.411	276.863	582.685	565.973	316.562	157.863	197.863	173.288	252.726		20.5227	473	446.863	498.301	466.712		20.5227	410.849	377.973	655.904	417.986	429.055		20.5227	479.562	355.712	245.151	464.014	439.164		20.5227	562.301	936.808	516.712	467.438	530.26		20.5227	356.849	391.863	403	505.589	508.26		20.5227	856.863	804.329	921.959	918.288
20.8538	372.295	280.421	606.452	580.021	340.579	172.853	208.137	185.716	271.137		20.8538	488	465.568	516.127	486.284		20.8538	434.716	400.736	696.822	432.295	455.243		20.8538	499.863	371.147	266.137	481.274	457.695		20.8538	584.411	977.325	554.147	481.137	579.305		20.8538	393.579	403.705	409.716	555.99	529.305		20.8538	888.421	824.401	939.747	936
21.1848	379.158	283.685	628.507	593.349	367.315	189.562	218.404	197.719	290.123		21.1848	502.438	478.562	532.37	508.842		21.1848	460.281	427.507	734.178	451.596	482.144		21.1848	519.877	390.877	290.404	499.527	479.493		21.1848	605.651	1024.86	590.877	496.562	635.349		21.1848	435.315	415.527	416	608.842	557.068		21.1848	915.685	843.212	959.541	953.438
21.5158	388	286.219	648.839	606.671	395.336	208.555	227.942	210.723	309.832		21.5158	516.168	486.277	546.884	533.664		21.5158	486.832	460.284	765.548	475.168	510.322		21.5158	538.89	415.058	318.387	519.774	505.438		21.5158	623.161	1077.4	625.613	514.277	696.671		21.5158	482.781	429.051	422.277	663	590.116		21.5158	938.664	860.329	979.342	969.89
21.8468	399.096	289.466	667.164	620.534	425.082	229	236.918	223.452	328.274		21.8468	530.904	489	559.11	560.74		21.8468	513.096	498.068	790.206	503.452	540.945		21.8468	556.904	445.26	350.644	543.014	533.932		21.8468	638.11	1134.96	655.63	535.726	763.26		21.8468	532.534	443.288	430.548	717.178	628.164		21.8468	956.644	876.192	997.425	987.356
22.1778	413.164	293.705	684.483	635.106	454.377	250.729	244.435	235.188	346		22.1778	546.377	486.729	571.788	590.517		22.1778	539.353	540.589	809.329	534.729	572.846		22.1778	572.918	479.753	386.623	568.517	565.14		22.1778	648.058	1195.53	680.647	560.918	831.106		22.1778	583.024	457.788	440.541	768.377	669.212		22.1778	970.894	890.082	1014.24	1005.84
22.5088	429.671	299.671	701.794	649.932	485.664	273.466	251.404	246.932	363.466		22.5088	563.13	481.199	583.206	621.808		22.5088	564.336	587.658	822.473	567.267	605.479		22.5088	586.664	520.26	427.603	595.74	598.075		22.5088	654.473	1258.12	698.664	590.397	899.664		22.5088	631.794	472.74	452.801	815.596	711.26		22.5088	983.603	900.733	1027.05	1026.06
22.8398	449.164	306.901	720.363	666	516.209	296.945	258.11	256.945	378.945		22.8398	580.89	474.682	596.373	655.065		22.8398	587.055	636.726	830.901	599.527	639.856		22.8398	599.682	565.044	471.582	623.692	632.747		22.8398	657.901	1319.24	709.209	624.363	965.736		22.8398	676.308	487.955	467.055	856.836	752.044		22.8398	993.582	908.682	1035.14	1049.31
23.1708	471.384	317.123	741.918	684.781	548.479	318.699	263.822	266.699	394.178		23.1708	599.397	468.178	610.301	690.767		23.1708	607.781	687.055	837.822	631.521	672.767		23.1708	611.438	614.575	517.301	650.904	666.425		23.1708	659.082	1378.11	712.479	661.616	1028.04		23.1708	713.836	503.644	482.562	889.616	788.836		23.1708	1004.56	913.918	1037.23	1073.84
23.5018	495.082	329.082	766.716	705.541	582.257	339.945	269.798	275.459	408.432		23.5018	617.175	463.945	627	727.706		23.5018	626	737.377	844.284	661.257	704.908		23.5018	623.202	668.377	563.771	675.11	698.853		23.5018	659.541	1432.5	708.743	701.147	1084.05		23.5018	743.634	519.853	499.798	914.404	819.89		23.5018	1015.54	916.918	1033.07	1100.38
23.8329	520.788	342.788	796.493	730.027	618.014	358.719	277.267	285.226	421.959		23.8329	633.959	463.466	646.733	766.616		23.8329	642.493	786.945	851.014	688	733.575		23.8329	635.226	724.438	610	697.055	730.041		23.8329	662.76	1483.62	700	742.438	1133.04		23.8329	764.438	536.801	519.027	930.199	844.945		23.8329	1029.52	919.452	1023.9	1127.93
24.1639	547.25	358.75	832	757	656.5	375.25	286.75	294.25	436.25		24.1639	649	468	668.75	808		24.1639	657.75	834.75	860.75	713.5	759.25		24.1639	651	782.5	653.25	714	758.25		24.1639	670	1529	688.25	784.25	1174.25		24.1639	776.5	555	540	939	863		24.1639	1045.75	923	1009	1153.75
24.4949	574.479	375.466	871.493	788.206	697.219	389.041	297.74	305.027	450.808		24.4949	662.548	477.795	694.301	852.877		24.4949	671.274	879.534	872.74	737.767	780.438		24.4949	670.027	841.562	692.521	727.945	784.233		24.4949	683.753	1569.37	675.247	826.068	1207.93		24.4949	780.315	574.192	563.479	941.055	874.808		24.4949	1065.97	930.562	990.849	1177.58
24.8259	601.486	393.432	915.973	823.647	740.918	400.839	312	316.812	466.38		24.8259	673.596	492.839	722.623	899.997		24.8259	685.812	922.298	886.973	762.568	797.134		24.8259	694.812	901.866	725.812	739.134	808.243		24.8259	705.757	1605.73	664.486	867.894	1234.59		24.8259	777.866	596.377	589.459	938.353	881.11		24.8259	1090.19	943.623	969.949	1198.16
25.1569	626.76	412.918	962.438	862.836	786.116	409.884	327.76	331.603	482.726		25.1569	683.404	512.884	752.966	950.39		25.1569	701.603	961.521	904.199	788.644	809.836		25.1569	725.842	963.925	754.884	749.596	830.281		25.1569	738.521	1638.33	659.479	907.445	1254.99		25.1569	772.164	621.555	619.719	933.644	884.404		25.1569	1117.88	964.685	949.048	1214.01
25.4879	651.055	434.418	1010.65	907.017	830.781	418.928	346.291	347.637	499.329		25.4879	692.456	537.164	786.038	1003.03		25.4879	718.637	998.473	922.89	818.51	819.544		25.4879	762.11	1026.98	778.219	760.544	852.11		25.4879	782	1667.67	662.473	946.747	1269.14		25.4879	765.456	649.726	654.473	929.928	885.928		25.4879	1149.07	995.456	930.147	1224.09
25.8189	674.37	457.397	1059.4	954.192	874.726	427.74	365.836	365.671	517.178		25.8189	703.274	563.904	822.342	1057.45		25.8189	738.137	1032.4	943.329	852.411	828.027		25.8189	805.137	1093.04	797.575	774.493	875.206		25.8189	835.699	1694.25	676.699	984.507	1278.82		25.8189	761.206	681.89	696.767	929.206	888.438		25.8189	1184.26	1036.21	916.479	1230.18
26.1499	694.935	483.688	1106.15	1006.13	914.901	437.788	386.394	384.935	535.805		26.1499	716.329	593.623	861.099	1112.65		26.1499	762.394	1063.52	963.983	893.116	836.753		26.1499	851.164	1162.87	814.182	793.983	900.558		26.1499	899.606	1718.03	704.688	1020.71	1285.28		26.1499	762.164	717.048	745.541	934.476	893.164		26.1499	1221.44	1086.39	909.805	1233.03
26.481	714.966	512.452	1150.9	1060.07	950.616	449.836	406.966	405.966	555.671		26.481	734.61	623.774	903.836	1167.65		26.481	789.87	1093.16	985.616	940.089	846.712		26.481	900.192	1236.71	831.801	821.486	929.932		26.481	971.712	1740.8	746.904	1055.87	1289.52		26.481	769.322	757.973	803.096	946.74	903.096		26.481	1260.39	1145.32	913.123	1234.9
26.812	733.997	545.777	1193.67	1117.01	980.339	464.884	426.551	426.219	577.544		26.812	758.106	655.668	950.997	1221.67		26.812	821.555	1121.01	1008.23	994.318	860.449		26.812	949.442	1314.77	850.658	856.781	964.771		26.812	1049.01	1761.55	803.113	1091	1292.56		26.812	785.668	802.897	868.11	967.219	920.223		26.812	1301.12	1210.45	928.435	1237.77
27.143	754.247	583.342	1234.44	1174.95	1002.07	482.712	444.932	447.027	601.425		27.143	789.37	687.534	1003.12	1272.73		27.143	860	1146.6	1031.82	1054.79	877.63		27.143	997.685	1397.84	873.74	901.096	1007.4		27.143	1128.7	1780.49	871.315	1124.32	1294.63		27.143	811.973	852.822	941.342	998.247	945.315		27.143	1341.41	1277.75	957.959	1243.64
27.474	775.706	624.706	1275	1232.67	1018.59	503.764	461.548	466.274	628.527		27.474	827.274	720.589	1059.43	1320.8		27.474	902.432	1171.75	1057.96	1120.51	899.373		27.474	1043.71	1483.12	902.038	954.216	1057.68		27.474	1208.9	1798.63	950.51	1158.16	1298.51		27.474	846.452	907.962	1018.78	1038.71	979.589		27.474	1380.51	1344.8	1002.47	1256.31
27.805	800.363	670.301	1314.79	1290.18	1028.34	527.603	476.178	484.514	659.63		27.805	872.151	756.397	1121.49	1365.7		27.805	951.425	1194.88	1087.88	1190.66	925.123		27.805	1086.73	1570.6	939.329	1014.15	1115.97		27.805	1286.28	1815.73	1035.49	1191.18	1304.42		27.805	889.671	969.671	1098.64	1089.15	1024.61		27.805	1416.85	1408.61	1061.97	1274.99
28.136	829	718.493	1355.79	1344.72	1033.88	553.658	489.613	501.538	693.942		28.136	922.209	795.969	1187.3	1407.04		28.136	1005.42	1217.8	1122.8	1263.81	954.089		28.136	1126.96	1658.28	985.822	1079.91	1182.45		28.136	1359.4	1832.58	1122.46	1224.76	1312.58		28.136	939.64	1037.6	1177.67	1149.58	1079.39		28.136	1449.79	1465.18	1136.45	1301.69
28.467	862.616	768.123	1398.79	1397.05	1037.64	580.507	501.479	516.767	733.247		28.467	976.438	841.315	1257.88	1445.62		28.467	1064.21	1239.73	1165.11	1338.16	984.849		28.467	1166.18	1742.95	1043.3	1150.51	1255.92		28.467	1426.07	1850.41	1207.23	1258.32	1323.97		28.467	994.37	1113.32	1252.67	1218.59	1142.93		28.467	1478.36	1513.32	1221.92	1335.19
28.798	901.414	818.767	1443.8	1445.41	1040.41	608.363	513.353	531.788	775.747		28.798	1032.83	895.243	1331.03	1481.2		28.798	1125.8	1262.24	1216.43	1411.72	1017.41		28.798	1205.6	1821.99	1111.17	1222.15	1333.37		28.798	1486.51	1869.21	1285.81	1291.45	1339.59		28.798	1050.87	1195.45	1319.84	1293.8	1215.25		28.798	1502.17	1550.04	1317.17	1374.12
29.1291	945.788	868.425	1491.2	1488.79	1047.19	635.226	526.233	546.007	822.432		29.1291	1090.17	958.973	1407.98	1515		29.1291	1189.4	1285.58	1279.18	1483.25	1049.19		29.1291	1249	1894	1192.01	1294.04	1412.82		29.1291	1539.73	1889.79	1355.2	1324.37	1359.41		29.1291	1106.95	1284.37	1376.97	1374.6	1293.16		29.1291	1520.03	1575.58	1418.22	1416.86
29.4601	994.147	916.096	1541.39	1529.2	1057.37	661.291	540.315	560.024	871.096		29.4601	1147.08	1034.12	1488.54	1545.8		29.4601	1252.83	1309.12	1353.17	1551.97	1080.78		29.4601	1299.39	1955.98	1283.22	1363.97	1489.44		29.4601	1585.74	1912.15	1413.41	1357.71	1383.44		29.4601	1161.44	1378.29	1423.66	1457.41	1374.88		29.4601	1533.92	1589.73	1519.46	1460.8
29.7911	1046.3	960.973	1592.77	1566.62	1074.53	686.356	555.589	575.041	920.932		29.7911	1202.95	1120.3	1571.11	1572.81		29.7911	1314.47	1334.49	1440.81	1616.48	1111.38		29.7911	1358.15	2009.73	1385.38	1430.14	1560.85		29.7911	1624.55	1936.49	1458.66	1389.26	1411.66		29.7911	1211.75	1474.41	1458.33	1540.04	1457.22		29.7911	1543.25	1591.73	1618.51	1504.95
30.1221	1101.26	1002.23	1645.32	1602.06	1098.88	710.421	573.856	591.247	971.928		30.1221	1257.59	1217.32	1657.32	1596.62		30.1221	1372.93	1361.7	1539.3	1676.97	1141.81		30.1221	1428.7	2054.26	1496.7	1492.52	1622.25		30.1221	1657.98	1962.64	1491.55	1419.64	1443.68		30.1221	1255.9	1569.52	1484.59	1621.3	1538.39		30.1221	1551.6	1584.38	1709.55	1548.09
30.4531	1157.03	1041.49	1697.66	1638.52	1131.4	733.856	594.301	610.075	1022.71		30.4531	1311.21	1322.37	1745.74	1616.63		30.4531	1425.97	1390.74	1648.04	1732.45	1171.82		30.4531	1510.4	2090.59	1612.33	1549.31	1671.63		30.4531	1686.43	1989.59	1513.49	1448.85	1478.89		30.4531	1293.88	1661.62	1504.66	1697.6	1616.22		30.4531	1559.16	1567.26	1789.6	1588.6
30.7841	1212.82	1078.73	1749.18	1677	1171.9	758.914	616.914	631.274	1071.64		30.7841	1366.08	1431.64	1836.82	1631.64		30.7841	1473.82	1422.82	1763.46	1781.92	1204.46		30.7841	1604.27	2121.72	1729.72	1600.47	1707.82		30.7841	1710.53	2017.54	1525.28	1477.09	1517.55		30.7841	1325.09	1746.9	1523.53	1768.91	1689.09		30.7841	1570.1	1544.18	1855.46	1626.28
31.1151	1268.25	1114.51	1797.85	1721.33	1220.21	784.151	641.329	655.466	1119.36		31.1151	1422.77	1542.58	1928.29	1645.29		31.1151	1517.04	1456.93	1881.3	1825.37	1239.47		31.1151	1706.92	2148.85	1845.05	1646.45	1730.18		31.1151	1730.66	2045.32	1529.3	1502.53	1557.22		31.1151	1350.14	1821.99	1544.41	1835.08	1754		31.1151	1586.05	1515.51	1904.33	1663.12
31.4461	1323.7	1150.9	1844.32	1771.68	1274.02	811.555	666.079	684.476	1164.05		31.4461	1480.29	1649.9	2017.78	1657.95		31.4461	1557.08	1494.08	1996.54	1862.81	1279.48		31.4461	1816.37	2175.45	1953.34	1687.62	1740.35		31.4461	1747.81	2072.45	1528.36	1525.35	1598.38		31.4461	1370.4	1885.89	1573.76	1896.63	1811.95		31.4461	1610.19	1485.03	1935.21	1699.11
31.7771	1377.17	1189.29	1887.77	1831.06	1334.28	840.774	690.801	717.486	1205.54		31.7771	1539.48	1748.43	2102.29	1673.46		31.7771	1595.46	1535.09	2104.98	1893.23	1323.83		31.7771	1926.14	2203.23	2050.39	1723.12	1742.68		31.7771	1763.65	2099.23	1523.47	1547	1640.4		31.7771	1387.68	1935.97	1613.14	1953.38	1861.12		31.7771	1642.66	1454.92	1948.92	1735.89
32.1082	1431.5	1229.83	1928.2	1899.13	1397.7	871.818	713.664	754.664	1243.01		32.1082	1599.36	1835.15	2179.15	1696.15		32.1082	1633.99	1579.97	2202.78	1915.98	1373.17		32.1082	2031.54	2235.85	2135.06	1755.28	1742.01		32.1082	1776.7	2125.35	1515.95	1566.17	1681.97		32.1082	1404.17	1973.2	1664.36	2008.64	1904.32		32.1082	1685.13	1428.32	1946.48	1773.15
32.4392	1485.85	1274.18	1964.6	1973.58	1465.93	903.027	736.329	796.671	1278.3		32.4392	1656.29	1908.04	2247.03	1731.7		32.4392	1675.34	1629.07	2286.77	1930.7	1427.49		32.4392	2128.75	2274.32	2206.37	1783.77	1743.32		32.4392	1788.78	2150.79	1507.29	1584.33	1723.59		32.4392	1421.84	1999.1	1727.45	2064.05	1940.88		32.4392	1736.41	1407.03	1929.22	1812.03
32.7702	1540.55	1322.36	1999.67	2052.88	1536.99	935.229	757.805	842.517	1310.41		32.7702	1709.25	1964.94	2302.07	1783.42		32.7702	1722.68	1681.37	2357.08	1939.23	1485.64		32.7702	2211.96	2320.97	2264.34	1811.08	1754.61		32.7702	1800.74	2177.06	1497.15	1601.48	1764.79		32.7702	1444.84	2014.15	1799.74	2119.94	1973.46		32.7702	1793.01	1393.03	1900.65	1851.03
33.1012	1596.27	1374.21	2031.88	2133.38	1611.88	967.267	777.418	892.212	1341.21		33.1012	1755.42	2006.85	2345.27	1857.32		33.1012	1774.16	1737.86	2411.7	1941.9	1544.79		33.1012	2278.99	2376.47	2312.82	1839.38	1779.05		33.1012	1812.05	2202.47	1486.02	1618.95	1806.08		33.1012	1475	2022.36	1878.89	2178.27	2006.22		33.1012	1853.59	1388.32	1864.12	1889.84
33.4322	1653.15	1429.08	2062.78	2211.07	1690.47	998.305	795.695	941.921	1372.16		33.4322	1792.46	2035.07	2378.46	1953.38		33.4322	1831.46	1798.53	2454.45	1939.69	1604.92		33.4322	2327.7	2442.15	2354.17	1868.99	1822.62		33.4322	1823.39	2228.01	1473.91	1638.23	1846.6		33.4322	1516	2026.55	1959.08	2240.69	2039.99		33.4322	1912.15	1393	1823.61	1926.31
33.7632	1709.04	1486.79	2092.52	2280.77	1772.22	1028.19	813.959	992.493	1404.96		33.7632	1819.7	2053.14	2402.79	2072.59		33.7632	1892.75	1862.37	2487.33	1936.15	1663.9		33.7632	2357.42	2518.7	2394.23	1902.73	1887.16		33.7632	1836.9	2253.52	1460.11	1659.66	1889.19		33.7632	1569.15	2029.58	2037.3	2307.21	2077.93		33.7632	1965.84	1407.47	1783.12	1958.6
34.0942	1763.23	1545.38	2121.12	2338.78	1856.83	1057.09	832.914	1040.09	1443.62		34.0942	1837.12	2064.35	2423.12	2212.94		34.0942	1955.88	1929.52	2514.17	1934.59	1721.74		34.0942	2372.01	2605.41	2437.74	1943.43	1973.83		34.0942	1852.44	2277.71	1444.46	1683.91	1931.16		34.0942	1635.15	2034.74	2109.56	2377.8	2122.73		34.0942	2011.35	1431.86	1745.67	1983.59
34.4252	1812.56	1604.27	2149.31	2382.81	1945.16	1084.99	852.726	1084.55	1489.29		34.4252	1845.71	2074.41	2443.57	2368.42		34.4252	2018.01	1998.96	2538.84	1936.15	1779.43		34.4252	2371.75	2701.14	2487.32	1992.4	2080.32		34.4252	1872	2299.75	1429.66	1710.3	1975.47		34.4252	1713.14	2041.9	2174.85	2452.17	2176.68		34.4252	2046.84	1464.9	1716.1	2000.43
34.7563	1855.02	1664.03	2176.67	2411.98	2034.81	1112.75	873.544	1123.05	1542.84		34.7563	1849.32	2085.61	2467.86	2532.02		34.7563	2076.26	2070.66	2564.47	1945.54	1837		34.7563	2363.21	2803.3	2545.81	2051.47	2201.05		34.7563	1895.86	2319.49	1416	1740.39	2020.12		34.7563	1801.86	2053.18	2232.17	2530.2	2239.51		34.7563	2070.46	1504.74	1694.84	2007
35.0873	1888.45	1722.95	2203.64	2426.42	2125.6	1138.81	897.233	1156.44	1605.55		35.0873	1851.95	2102.67	2500.14	2696.32		35.0873	2129.37	2143.62	2594.08	1964.78	1896.73		35.0873	2348.97	2910.32	2615.23	2121.63	2332.62		35.0873	1924.59	2336.84	1407.47	1771.6	2067.07		35.0873	1898.59	2069.16	2283.81	2610.03	2312.34		35.0873	2083.18	1549.26	1683.74	2003.45
35.4183	1911.73	1780.86	2229.8	2428.86	2216.4	1164.86	922.801	1183.99	1676.13		35.4183	1857.6	2126.86	2541.4	2850.6		35.4183	2176.34	2217.53	2628.53	1995.87	1960.6		35.4183	2335.74	3018.47	2693.73	2202.87	2467.01		35.4183	1958.47	2349.94	1406.92	1804.67	2113.58		35.4183	1999.33	2089.28	2333.46	2691.41	2393.33		35.4183	2088.73	1598.21	1684.65	1989.93
35.7493	1922.13	1838.05	2254.87	2422.4	2304.47	1191.79	951.26	1207.58	1752.61		35.7493	1870.27	2159.05	2591.52	2987.74		35.7493	2218.43	2292.53	2668.96	2037.95	2030.48		35.7493	2327.38	3123.74	2779.44	2294.78	2597.25		35.7493	1997.09	2360.82	1417.36	1837.73	2161.08		35.7493	2099.83	2112.25	2385.27	2772.25	2481.32		35.7493	2089.39	1649.77	1697.84	1970.31
36.0803	1921.51	1894.1	2280.11	2413.93	2389.41	1217.1	981	1227.31	1831.24		36.0803	1892.96	2200.1	2649.63	3100.75		36.0803	2257.27	2366.61	2714.24	2091.03	2108.24		36.0803	2329.04	3222.25	2870.21	2396.39	2717.34		36.0803	2037.86	2370.38	1440.92	1871.53	2207.08		36.0803	2196.35	2139.21	2441.96	2849.08	2574.31		36.0803	2090.89	1701.08	1724.03	1947.72
36.4113	1911.74	1948.27	2304.52	2407.44	2469.59	1243.15	1012.63	1246.95	1908.01		36.4113	1927.92	2246.4	2711.74	3183.51		36.4113	2297.11	2439.51	2763.38	2152.85	2192.14		36.4113	2341.71	3310.74	2961.3	2502.85	2823.04		36.4113	2080.4	2380.89	1479.58	1903.47	2252.16		36.4113	2282.9	2171.04	2504.92	2920.42	2670.44		36.4113	2095.36	1753.05	1761.59	1926.41
36.7423	1895.84	2000.44	2331.08	2406.28	2542.76	1268.44	1044.52	1267.85	1979.8		36.7423	1976.76	2295.56	2775.72	3235.16		36.7423	2341.72	2510.12	2813.64	2220.68	2282.16		36.7423	2369.4	3387.2	3049.57	2612.04	2908.75		36.7423	2122.08	2392.48	1533.33	1936.16	2295.33		36.7423	2358.36	2208.75	2573.88	2982.67	2767.57		36.7423	2106.8	1804.08	1811.13	1913.24
37.0733	1877.93	2050.49	2357.9	2415.97	2608.14	1292.72	1077.3	1293.76	2042.6		37.0733	2037.74	2345.6	2837.82	3255.6		37.0733	2392.35	2576.7	2863.77	2292.4	2377.18		37.0733	2411.86	3449.63	3132.11	2720.75	2976.12		37.0733	2160.79	2408.16	1601.27	1969.86	2335.68		37.0733	2418.21	2253.47	2647.86	3033.84	2863.81		37.0733	2127.1	1853.91	1869.76	1912.21
37.4044	1864.9	2099.42	2387.74	2436.63	2666.28	1316.98	1108.21	1323.91	2095.53		37.4044	2108.95	2392.53	2893.9	3247.19		37.4044	2453.66	2638.02	2912	2364.02	2475.1		37.4044	2467.58	3498.03	3206.91	2824.36	3023.52		37.4044	2196.51	2428.14	1679.29	2004.47	2373.98		37.4044	2463.06	2308.97	2721.95	3071.05	2959.93		37.4044	2157.26	1902.92	1936.59	1927.63
37.7354	1860.77	2145.47	2420.81	2468.36	2716.29	1341.23	1137.23	1360.18	2138.36		37.7354	2187.26	2433.58	2943.99	3215.92		37.7354	2525.12	2695.21	2957.22	2433.44	2574.9		37.7354	2536.1	3533.3	3273.74	2921.66	3055.84		37.7354	2229.26	2454.52	1763.36	2042.1	2408.42		37.7354	2492.26	2376.49	2791.82	3094.3	3052.16		37.7354	2196.3	1951.99	2008.38	1964.03
38.0664	1869.74	2191.3	2456.98	2509.15	2758.18	1363.58	1163.36	1402.54	2171.3		38.0664	2268.88	2468.51	2987.17	3168.77		38.0664	2606.51	2746.27	3000.42	2499	2673.73		38.0664	2612.74	3557.44	3331.9	3010.68	3076.08		38.0664	2259.03	2487.37	1848.58	2082.64	2441.69		38.0664	2508.56	2457.82	2851.71	3102.91	3142.39		38.0664	2242.23	2001.21	2083.03	2021.51
38.3974	1896.51	2238.15	2498.25	2555	2791.08	1385.79	1185.49	1449.89	2196.46		38.3974	2351.56	2498.36	3024.23	3114.64		38.3974	2695.84	2792.23	3041.51	2560.38	2771.56		38.3974	2694.31	3572.57	3384.17	3089.77	3091.36		38.3974	2287.92	2525.55	1929.62	2126.1	2471.89		38.3974	2514.15	2553.08	2897.61	3100.54	3228.51		38.3974	2292.05	2051.49	2155.74	2098.18
38.7284	1942.3	2286.01	2543.51	2601.79	2818.68	1408	1204.5	1500.42	2219.41		38.7284	2432.4	2523.21	3058.29	3060.72		38.7284	2788.32	2835.09	3081.7	2617.81	2867.31		38.7284	2775.9	3579.68	3430.53	3159.01	3106.69		38.7284	2317.02	2569.93	2000.59	2171.7	2501.02		38.7284	2513.81	2659.48	2926.52	3089.59	3308.72		38.7284	2342.69	2102.11	2224.41	2188.9
39.0594	2007.1	2336.79	2591.95	2646.53	2839.49	1428.29	1218.62	1551.93	2241.56		39.0594	2508.38	2546.99	3092.34	3014.99		39.0594	2880.03	2875.96	3122.77	2672.27	2961.08		39.0594	2852.52	3582.59	3472.97	3219.32	3126.15		39.0594	2348.03	2616.78	2058.49	2219.23	2527.89		39.0594	2511.62	2775.73	2940.36	3074.73	3383.74		39.0594	2390.44	2154.85	2285.95	2288.58
39.3904	2089.91	2389.78	2644.26	2686.13	2858.03	1448.46	1228.54	1602.5	2266.71		39.3904	2580.29	2571.78	3128.39	2982.34		39.3904	2966.67	2915.92	3164.83	2724.87	3052.87		39.3904	2920.17	3581.5	3513.49	3271.67	3156.55		39.3904	2382.23	2664.76	2101.24	2266.8	2552.71		39.3904	2511.55	2897.02	2940.3	3061.13	3450.95		39.3904	2432.11	2207.71	2339.35	2388.2
39.7214	2185.64	2446.68	2699.55	2717.76	2874.69	1467.62	1234.55	1650.04	2296.93		39.7214	2647.23	2602.6	3170.34	2966.75		39.7214	3042.62	2956.98	3208.8	2776.51	3142.6		39.7214	2976.75	3578.32	3552.15	3315.44	3197.09		39.7214	2420.42	2711.68	2128.74	2312.4	2574.29		39.7214	2517.42	3017.36	2932.26	3053.49	3510.06		39.7214	2466.8	2259.75	2381.82	2478.69
40.0524	2290.49	2503.69	2754.83	2742.08	2893.37	1486.68	1238.4	1693.54	2333.14		40.0524	2710.08	2640.43	3219.28	2969.14		40.0524	3104.75	3000.94	3253.77	2828.26	3227.52		40.0524	3018.54	3572.14	3590.69	3350.4	3249.74		40.0524	2462.6	2755.54	2141.11	2354.12	2591.66		40.0524	2532.31	3133.66	2922.4	3055.91	3560.17		40.0524	2492.51	2310.8	2416.09	2551.23
40.3835	2399.18	2559.78	2810	2759.37	2916.07	1503.82	1239.26	1731.01	2374.42		40.3835	2769.78	2689.29	3275.15	2988.42		40.3835	3150.04	3046.99	3298.66	2880.12	3306.37		40.3835	3047.27	3564.89	3626.36	3375.55	3311.42		40.3835	2508.95	2792.26	2143.11	2391.86	2603.84		40.3835	2557.21	3240.1	2918.55	3068.29	3600.37		40.3835	2510.33	2357.93	2443.25	2600.47
40.7145	2506.9	2613.87	2861.24	2771.54	2943.87	1520.87	1239.13	1763.37	2417.76		40.7145	2828.25	2748.16	3336.95	3021.61		40.7145	3178.48	3094.95	3340.47	2931.16	3377.32		40.7145	3063.11	3556.73	3658.98	3389.93	3379.21		40.7145	2559.27	2819.84	2137.1	2423.64	2608.92		40.7145	2594.86	3333.58	2925.85	3092.54	3632.48		40.7145	2520.32	2400.05	2464.47	2618.68
41.0455	2606.64	2662.97	2907.3	2780.62	2978.83	1536.83	1239.02	1789.62	2460.15		41.0455	2884.6	2816.21	3400.83	3063.7		41.0455	3189.97	3142.9	3376.3	2982.21	3435.36		41.0455	3068.97	3549.51	3687.55	3393.36	3447.1		41.0455	2612.64	2836.23	2127.84	2449.51	2606.92		41.0455	2643.37	3412.19	2949.21	3124.69	3655.66		41.0455	2526.23	2434.25	2483.68	2605.79
41.3765	2695.42	2707.06	2946.36	2789.6	3019.72	1551.86	1239.92	1809.93	2499.43		41.3765	2940.75	2892.2	3464.65	3110.64		41.3765	3188.49	3188.86	3405.14	3031.34	3479.41		41.3765	3068.84	3544.29	3708.22	3383.84	3511.92		41.3765	2668.07	2840.43	2119.52	2469.48	2598.78		41.3765	2702.6	3477.84	2990.55	3162.67	3671.91		41.3765	2528.36	2460.28	2503.79	2561.73
41.7075	2769.22	2745.22	2976.41	2801.42	3063.82	1566.75	1241.84	1825.14	2531.75		41.7075	2995.66	2973.26	3522.55	3157.59		41.7075	3175.04	3230.75	3424.07	3076.53	3505.47		41.7075	3066.81	3543.1	3721.75	3361.36	3566.9		41.7075	2727.45	2831.41	2116.15	2484.47	2583.73		41.7075	2770.66	3529.67	3047.95	3202.56	3683.08		41.7075	2531.41	2475.45	2526.89	2488.67
42.0385	2827.05	2778.44	2996.33	2816.19	3109.85	1581.65	1245.83	1836.26	2555.04		42.0385	3048.42	3054.4	3571.46	3201.48		42.0385	3156.48	3265.52	3433.93	3117.79	3510.66		42.0385	3068.85	3548.85	3726.24	3328.83	3608.96		42.0385	2787.87	2810.26	2117.73	2494.53	2564.67		42.0385	2843.55	3571.53	3117.44	3241.32	3688.31		42.0385	2536.46	2480.48	2553.98	2393.54
42.3695	2868.84	2809.58	3004.25	2835.02	3151.99	1597.49	1251.89	1842.37	2567.36		42.3695	3099.07	3134.53	3607.43	3240.38		42.3695	3136.82	3292.31	3434.82	3153.09	3495.84		42.3695	3078.97	3561.62	3722.73	3290.14	3636.08		42.3695	2850.18	2777.06	2126.28	2500.6	2543.69		42.3695	2921.25	3605.53	3195.77	3275.02	3689.52		42.3695	2544.49	2475.57	2587.05	2284.4
42.7005	2894.73	2840.78	3001.17	2859.68	3187.05	1614.35	1258.95	1844.52	2570.51		42.7005	3144.67	3208.79	3628.41	3273.3		42.7005	3119.12	3309.06	3428.83	3182.31	3462.02		42.7005	3100.08	3583.41	3712.98	3248.42	3646.36		42.7005	2913.47	2734.83	2140.86	2502.67	2522.88		42.7005	2999.84	3634.55	3274.13	3303.74	3684.84		42.7005	2556.52	2462.65	2623.16	2173.15
43.0316	2907.64	2874.96	2988.11	2888.36	3211.1	1632.22	1269.01	1843.66	2565.59		43.0316	3187.12	3277.03	3634.49	3300.34		43.0316	3107.27	3316.78	3419.84	3204.58	3411.3		43.0316	3135.3	3613.27	3697.25	3210.56	3642.56		43.0316	2976.66	2685.62	2159.48	2498.86	2506.05		43.0316	3076.4	3660.75	3348.4	3326.47	3675.12		43.0316	2572.44	2443.73	2663.15	2068.03
43.3626	2910.64	2915.08	2965.1	2921.05	3221.08	1653.05	1279.18	1841.72	2553.59		43.3626	3223.57	3337.3	3625.62	3323.38		43.3626	3102.36	3317.54	3409.9	3220.77	3347.61		43.3626	3184.51	3650.1	3680.36	3181.59	3626.79		43.3626	3038.82	2635.38	2179.18	2489.1	2493.41		43.3626	3150.83	3685.95	3413.54	3345.26	3658.33		43.3626	2591.31	2421.85	2703.08	1979.9
43.6936	2908.65	2961.18	2936.05	2958.68	3214.05	1675.9	1291.28	1837.86	2539.53		43.6936	3256.06	3389.61	3605.72	3344.52		43.6936	3104.38	3312.38	3403.9	3229.04	3276.99		43.6936	3245.71	3691.95	3665.35	3167.57	3602.05		43.6936	3099.82	2586.28	2198.86	2473.27	2485.82		43.6936	3219.35	3710.23	3465.66	3363.06	3631.66		43.6936	2611.1	2399.9	2740.05	1916.82
44.0246	2903.68	3013.24	2903.04	2999.34	3190.93	1700.82	1303.38	1835.89	2526.42		44.0246	3285.51	3435.89	3577.85	3364.64		44.0246	3111.4	3304.33	3402.04	3232.2	3206.33		44.0246	3315.89	3734.87	3654.18	3170.6	3573.27		44.0246	3156.76	2542.29	2215.58	2449.53	2483.25		44.0246	3282.87	3732.53	3505.69	3379.91	3595.91		44.0246	2629.87	2380.04	2772.98	1886.69
44.3556	2899.74	3070.22	2869.04	3042.95	3153.74	1727.71	1315.47	1835.95	2516.27		44.3556	3313.03	3477.1	3545.99	3384.88		44.3556	3122.33	3298.3	3408.16	3230.34	3141.71		44.3556	3389.1	3776.79	3649.01	3192.59	3545.37		44.3556	3210.66	2508.3	2227.41	2418.73	2482.64		44.3556	3338.48	3751.89	3534.63	3398.81	3550.16		44.3556	2645.67	2365.12	2797.86	1892.6
44.6866	2897.82	3127.21	2836.08	3086.6	3103.57	1753.7	1327.59	1839.94	2514.09		44.6866	3340.64	3513.32	3517.02	3408		44.6866	3132.3	3295.32	3422.23	3225.4	3089		44.6866	3460.28	3813.77	3651.73	3234.59	3520.45		44.6866	3258.53	2485.4	2236.26	2380.95	2483.92		44.6866	3388.13	3767.17	3553.59	3420.7	3495.38		44.6866	2657.47	2356.23	2813.72	1933.54
45.0176	2900.91	3181.21	2807.07	3130.31	3046.34	1779.69	1340.62	1849.86	2520.89		45.0176	3370.27	3545.52	3493.1	3433.14		45.0176	3139.27	3298.38	3441.34	3217.49	3051.27		45.0176	3523.38	3842.73	3662.44	3291.62	3502.45		45.0176	3301.38	2476.49	2241.17	2340.14	2482.16		45.0176	3430.79	3776.45	3568.49	3445.54	3433.55		45.0176	2664.28	2352.31	2819.62	2007.44
45.3486	2907.03	3228.17	2784.09	3171.12	2984.18	1802.69	1352.69	1863.8	2537.71		45.3486	3401.03	3573.69	3479.08	3459.28		45.3486	3140.31	3309.45	3465.4	3208.57	3029.49		45.3486	3572.51	3862.69	3681.11	3359.69	3491.37		45.3486	3336.31	2482.6	2243.12	2298.29	2477.25		45.3486	3466.55	3778.66	3580.45	3471.39	3369.65		45.3486	2665.17	2353.43	2817.43	2108.33
45.6796	2915.19	3263.21	2769.05	3208.92	2923.97	1821.73	1364.73	1883.68	2564.55		45.6796	3433.86	3598.78	3476.04	3485.36		45.6796	3135.3	3327.53	3491.41	3201.64	3025.6		45.6796	3603.59	3870.67	3704.82	3433.75	3486.3		45.6796	3365.19	2500.73	2244.11	2260.45	2466.22		45.6796	3494.36	3770.84	3595.4	3496.23	3305.74		45.6796	2661.12	2359.47	2806.3	2228.18
46.0107	2924.37	3285.23	2761	3239.86	2867.83	1833.76	1375.78	1907.58	2601.41		46.0107	3466.76	3617.86	3484.98	3510.38		46.0107	3123.31	3352.62	3515.43	3199.66	3036.62		46.0107	3613.66	3867.62	3731.58	3505.83	3487.17		46.0107	3384.19	2531.81	2244.12	2230.57	2450.06		46.0107	3515.22	3754.95	3612.42	3519.03	3248.74		46.0107	2652.14	2367.53	2789.17	2358.03
46.3417	2932.56	3292.32	2759.96	3263.82	2820.71	1838.82	1386.82	1934.45	2646.27		46.3417	3497.71	3630.9	3505.86	3531.39		46.3417	3106.33	3383.67	3535.39	3202.73	3059.58		46.3417	3602.69	3852.59	3760.37	3570.88	3491.06		46.3417	3395.16	2572.9	2245.1	2213.67	2429.79		46.3417	3527.12	3730.02	3635.49	3535.84	3203.68		46.3417	2638.24	2376.53	2767.06	2488.86
46.6727	2937.77	3286.42	2764.9	3277.83	2783.66	1835.83	1396.86	1962.34	2696.19		46.6727	3521.73	3634.93	3536.72	3544.38		46.6727	3087.33	3417.73	3548.36	3213.78	3089.48		46.6727	3569.74	3826.59	3787.24	3622.93	3493.98		46.6727	3396.15	2620.95	2244.14	2210.76	2407.47		46.6727	3531.05	3699.05	3662.57	3545.67	3172.6		46.6727	2622.35	2384.51	2741	2612.65
47.0037	2939	3268.53	2772.84	3281.88	2758.66	1823.86	1404.89	1989.23	2747.12		47.0037	3537.75	3629.95	3575.55	3549.32		47.0037	3069.3	3453.78	3554.29	3233.82	3124.36		47.0037	3520.77	3793.6	3812.12	3656.99	3496.93		47.0037	3386.16	2673.99	2242.15	2224.81	2386.11		47.0037	3525.01	3663.04	3692.67	3548.48	3160.47		47.0037	2604.48	2391.47	2713.96	2720.48
47.3347	2935.25	3242.66	2779.82	3273.93	2744.69	1802.9	1411.93	2013.16	2795.09		47.3347	3541.8	3614.96	3618.39	3542.25		47.3347	3054.25	3488.83	3551.22	3261.89	3160.23		47.3347	3457.82	3754.65	3832.06	3673	3496.93		47.3347	3366.15	2729.99	2238.13	2252.87	2368.77		47.3347	3510	3625.03	3722.78	3542.32	3165.34		47.3347	2585.62	2396.38	2684.95	2809.29
47.6657	2928.5	3209.79	2782.84	3252.97	2742.77	1774.92	1417.95	2034.09	2836.06		47.6657	3531.87	3588.98	3661.25	3523.16		47.6657	3046.18	3520.88	3542.13	3297.93	3195.12		47.6657	3386.88	3712.74	3847.03	3668.01	3495.95		47.6657	3336.12	2785	2230.11	2291.92	2360.45		47.6657	3485.99	3588.01	3749.88	3528.19	3187.2		47.6657	2567.76	2399.27	2655.95	2874.14
47.9967	2919.75	3173.9	2778.9	3219	2749.88	1739.96	1421.98	2049.04	2866.03		47.9967	3508.94	3552.99	3703.11	3490.08		47.9967	3046.1	3548.93	3526.06	3339.97	3228.03		47.9967	3314.93	3672.86	3856	3645.01	3494.97		47.9967	3297.08	2838	2218.07	2337.96	2362.19		47.9967	3454	3555	3771.95	3508.09	3223.08		47.9967	2550.89	2401.14	2624.98	2916.04
48.3277	2909	3137	2766	3173	2766	1700	1425	2058	2881		48.3277	3473	3508	3740	3445		48.3277	3055	3569	3507	3384	3258		48.3277	3248	3637	3859	3607	3497		48.3277	3251	2886	2202	2383	2376		48.3277	3414	3527	3784	3482	3267		48.3277	2537	2402	2592	2934
48.6588	2900.22	3099.06	2741.13	3113.96	2787.1	1659.06	1427.02	2061.92	2878.94		48.6588	3428.09	3454.98	3768.89	3389.96		48.6588	3072.93	3580.02	3485.97	3428.02	3285.99		48.6588	3192.08	3608.13	3856.98	3558.98	3504		48.6588	3200.87	2926	2181.95	2423.03	2398.87		48.6588	3368.98	3505.03	3784	3452.93	3314		48.6588	2526.04	2402.88	2556.98	2932.97
48.9898	2893.4	3059.11	2706.27	3043.92	2811.16	1618.12	1428.03	2059.83	2858.88		48.9898	3378.16	3396.96	3787.82	3327.94		48.9898	3098.86	3582.02	3464.95	3466.03	3312.03		48.9898	3149.14	3586.27	3848.97	3503.96	3516.99		48.9898	3148.73	2956.99	2160.9	2451.05	2430.82		48.9898	3320.97	3489.08	3768	3419.88	3359.04		48.9898	2520.06	2404.77	2519.94	2917.01
49.3208	2889.54	3016.16	2663.42	2965.87	2834.2	1581.2	1429.05	2054.71	2821.8		49.3208	3327.2	3334.95	3794.77	3261.95		49.3208	3130.77	3573	3443.98	3495.02	3336.1		49.3208	3124.16	3573.38	3835.98	3447.94	3538.95		49.3208	3096.61	2976	2138.89	2463.06	2466.82		49.3208	3271.95	3478.13	3734.01	3385.83	3396.13		49.3208	2518.06	2406.67	2479.88	2890.14
49.6518	2887.66	2970.19	2615.55	2881.82	2855.16	1551.23	1429.07	2048.55	2770.73		49.6518	3279.21	3273.93	3788.74	3196		49.6518	3166.68	3552.96	3424.04	3512	3359.21		49.6518	3116.15	3567.47	3819	3395.92	3567.9		49.6518	3048.49	2983.03	2117.95	2454.08	2502.85		49.6518	3223.95	3471.19	3681.03	3349.78	3423.26		49.6518	2521.04	2410.62	2438.79	2858.33
49.9828	2889.7	2919.19	2567.65	2795.79	2869.09	1528.27	1430.07	2040.4	2707.69		49.9828	3239.15	3215.93	3767.74	3134.07		49.9828	3204.61	3521.91	3404.14	3514.98	3382.31		49.9828	3124.07	3566.51	3798.03	3350.9	3601.85		49.9828	3005.4	2977.09	2101.05	2425.09	2532.91		49.9828	3178.93	3465.26	3608.09	3312.73	3435.45		49.9828	2528	2415.59	2396.69	2825.55
50.3138	2890.72	2863.18	2525.7	2709.79	2874.94	1514.29	1430.08	2034.2	2638.69		50.3138	3208.08	3164.96	3730.75	3080.14		50.3138	3242.53	3481.84	3381.29	3502.96	3402.47		50.3138	3144.94	3565.53	3773.12	3315.86	3639.77		50.3138	2968.32	2958.16	2089.25	2376.08	2553.96		50.3138	3138.94	3460.31	3516.18	3273.69	3434.66		50.3138	2538.92	2420.63	2356.57	2793.8
50.6448	2891.67	2803.12	2494.67	2626.86	2868.76	1508.31	1429.05	2030.97	2567.76		50.6448	3186.95	3124.98	3679.76	3036.24		50.6448	3279.42	3434.76	3354.46	3474.95	3420.65		50.6448	3175.74	3561.53	3746.24	3291.83	3674.76		50.6448	2937.26	2928.29	2083.5	2311.05	2559.05		50.6448	3103.95	3452.36	3408.31	3233.69	3419.89		50.6448	2551.81	2427.71	2319.47	2766.03
50.9758	2887.58	2741.03	2477.63	2550.92	2850.56	1511.27	1426.03	2028.77	2499.89		50.9758	3176.78	3098	3613.78	3005.27		50.9758	3313.37	3382.67	3321.66	3433	3435.85		50.9758	3211.48	3548.49	3718.36	3276.84	3704.75		50.9758	2909.23	2889.44	2084.85	2233.03	2547.11		50.9758	3075	3441.41	3287.47	3191.7	3395.12		50.9758	2564.67	2433.86	2288.37	2741.23
51.3069	2877.46	2679.82	2477.52	2481.03	2820.32	1521.25	1419.97	2028.55	2438.03		51.3069	3172.63	3086.06	3534.82	2987.28		51.3069	3344.29	3328.57	3280.86	3380.03	3448.08		51.3069	3246.23	3522.49	3688.52	3270.85	3724.75		51.3069	2883.2	2844.62	2092.23	2149	2516.15		51.3069	3051.06	3428.4	3159.65	3146.75	3361.39		51.3069	2575.57	2440.09	2264.35	2720.36
51.6379	2859.27	2620.59	2494.41	2420.14	2779.04	1534.24	1411.86	2030.32	2384.24		51.6379	3173.49	3089.14	3444.83	2983.21		51.6379	3370.28	3274.52	3231.13	3318.07	3454.37		51.6379	3277.97	3480.51	3659.68	3268.97	3731.83		51.6379	2857.11	2796.79	2106.61	2065.93	2465.21		51.6379	3031.14	3412.34	3031.86	3099.83	3323.58		51.6379	2584.38	2445.38	2250.32	2700.4
51.9689	2831.15	2567.28	2527.3	2366.26	2727.79	1549.26	1398.77	2030.19	2338.49		51.9689	3176.36	3106.23	3347.81	2992.08		51.9689	3391.25	3223.51	3173.36	3251.15	3456.66		51.9689	3302.76	3420.6	3630.87	3269.11	3724.92		51.9689	2826.06	2747.94	2125	1989.89	2397.23		51.9689	3013.26	3394.23	2911.02	3048.96	3283.73		51.9689	2586.28	2449.72	2244.43	2679.39
52.2999	2793	2521.89	2572.16	2319.41	2671.52	1563.25	1382.59	2027.07	2301.66		52.2999	3176.38	3134.37	3244.84	3010.88		52.2999	3404.34	3178.51	3109.6	3183.21	3452.01		52.2999	3318.64	3342.7	3603.07	3266.37	3702.16		52.2999	2788.97	2701.99	2146.34	1927.84	2314.29		52.2999	2996.45	3376	2804.11	2994.12	3243.85		52.2999	2582.14	2453.11	2248.51	2657.23
52.6309	2744.91	2484.44	2623.04	2279.53	2610.31	1572.31	1362.33	2019	2269.8		52.6309	3172.47	3167.53	3142.73	3037.6		52.6309	3409.47	3137.6	3041.87	3117.27	3441.32		52.6309	3324.58	3248.85	3577.29	3256.8	3667.4		52.6309	2743.89	2658.02	2167.58	1882.82	2222.31		52.6309	2978.58	3357.69	2716.2	2934.36	3205.87		52.6309	2568.11	2455.47	2259.69	2630.07
52.9619	2689.76	2454.03	2674.05	2244.67	2549.08	1576.43	1338.14	2005.99	2241.82		52.9619	3162.62	3200.72	3041.71	3068.38		52.9619	3404.66	3103.76	2975.06	3057.24	3422.64		52.9619	3318.71	3143.1	3551.49	3238.25	3622.72		52.9619	2688.85	2617.96	2186.68	1857.81	2127.34		52.9619	2956.77	3341.18	2650.25	2868.62	3169.87		52.9619	2544.14	2454.87	2274.9	2598.77
53.2929	2626.79	2430.59	2720.95	2212.77	2489.89	1574.46	1310.87	1986.05	2213.77		53.2929	3144.9	3227.92	2947.54	3099.13		53.2929	3389	3074.95	2911.26	3005.26	3393.93		53.2929	3300.97	3032.28	3526.64	3208.8	3573.13		53.2929	2624.82	2579.77	2200.62	1854.79	2035.41		53.2929	2929.98	3326.61	2609.18	2798.87	3135.8		53.2929	2509.18	2452.26	2291.1	2560.51
53.6239	2559.84	2411.21	2754.95	2182.93	2434.7	1564.55	1281.63	1960.19	2184.55		53.6239	3119.27	3241.15	2861.4	3126.01		53.6239	3362.33	3051.22	2854.36	2963.16	3356.12		53.6239	3271.34	2922.48	3500.81	3167.41	3521.59		53.6239	2553.9	2543.49	2207.41	1870.84	1953.55		53.6239	2897.15	3312.97	2590.99	2724.21	3101.64		53.6239	2462.23	2446.63	2302.38	2517.22
53.9549	2491.94	2392.97	2773.94	2155.05	2384.61	1547.7	1251.43	1929.37	2151.29		53.9549	3085.64	3236.4	2785.18	3144.95		53.9549	3322.82	3030.52	2806.39	2930.12	3305.2		53.9549	3228.88	2820.57	3471.92	3114.97	3474.1		53.9549	2479.95	2507.17	2204.04	1903.83	1889.64		53.9549	2858.22	3300.21	2592.76	2648.46	3065.46		53.9549	2402.42	2437.85	2303.64	2467
54.286	2424.06	2372.86	2774.82	2126.17	2340.53	1526.8	1222.15	1894.58	2114.88		54.286	3043.99	3210.6	2719.89	3153.01		54.286	3272.29	3012.8	2766.34	2905.94	3242.14		54.286	3174.43	2732.54	3439.91	3053.45	3432.65		54.286	2404.2	2468.88	2191.48	1947.94	1846.86		54.286	2811.36	3285.49	2609.43	2572.79	3024.17		54.286	2330.63	2423.08	2291.86	2412.88
54.617	2359.26	2349.88	2754.74	2096.24	2302.46	1501.85	1193.05	1857.83	2074.41		54.617	2994.3	3162.69	2664.7	3147.15		54.617	3210.82	2995.11	2735.21	2887.8	3165.99		54.617	3107.04	2660.43	3403.89	2985.77	3400.12		54.617	2333.41	2428.54	2167.78	1999.07	1829.04		54.617	2758.3	3266.71	2636	2500.02	2974.91		54.617	2248.74	2404.12	2263.04	2353.87
54.948	2300.41	2321.12	2714.66	2063.37	2270.53	1473.96	1166.95	1819.18	2031.04		54.948	2935.51	3094.71	2620.42	3124.38		54.948	3140.26	2977.44	2708.99	2871.73	3076.67		54.948	3027.58	2608.03	3361.78	2913.97	3374.63		54.948	2269.79	2385.18	2134.07	2052.14	1836.3		54.948	2699.16	3240.07	2666.52	2432.26	2916.62		54.948	2156.93	2379.01	2215.23	2292.93
55.279	2246.58	2286.63	2657.57	2026.44	2244.63	1447.01	1142.91	1781.5	1989.63		55.279	2868.58	3008.73	2583.2	3085.64		55.279	3062.59	2957.65	2685.65	2854.64	2978.16		55.279	2937.09	2572.65	3314.51	2840.88	3357.03		55.279	2216.22	2338.99	2094.28	2102.29	1865.65		55.279	2634.93	3202.61	2694.14	2370.52	2848.22		55.279	2059.93	2346.73	2149.44	2231.07
55.61	2200.53	2247.34	2587.4	1985.43	2224.74	1420.05	1121.04	1743.77	1950.42		55.61	2793.43	2911.58	2553.04	3031.77		55.61	2977.79	2935.88	2660.36	2832.62	2871.58		55.61	2837.56	2553	3262.13	2768.62	3342.45		55.61	2176.6	2290.79	2049.42	2143.53	1913.88		55.61	2565.68	3153.2	2717.57	2314.79	2767.92		55.61	1959	2307.34	2067.73	2170.23
55.941	2160.39	2205.13	2508.29	1939.42	2209.95	1394.18	1103.19	1708	1918.35		55.941	2711.1	2808.34	2527.03	2962.84		55.941	2887.99	2910.05	2630.87	2802.61	2761.02		55.941	2731.84	2542.37	3203.79	2698.23	3327.73		55.941	2149.1	2240.82	2002.56	2174.71	1972.28		55.941	2494.24	3090.01	2731.19	2264.99	2679.53		55.941	1857.92	2260.73	1976.89	2112.47
56.272	2124.16	2161.92	2425.18	1889.4	2200.19	1371.23	1086.36	1672.25	1894.44		56.272	2622.74	2705.99	2503.19	2882.67		56.272	2795.88	2879.22	2592.58	2762.67	2652.33		56.272	2624.96	2537.68	3141.25	2630.63	3308.85		56.272	2134.48	2190.93	1955.79	2190.99	2035.55		56.272	2419.75	3012	2733.95	2218.21	2584.26		56.272	1761.84	2208.07	1881.97	2058.82
56.603	2091.74	2118.77	2342.06	1834.37	2194.37	1350.28	1070.72	1637.34	1881.72		56.603	2531.34	2609.51	2481.29	2794.23		56.603	2702.57	2842.4	2546.17	2710.83	2550.57		56.603	2519	2531.2	3072.74	2564.97	3281.88		56.603	2128.8	2142.14	1912.06	2191.37	2095.74		56.603	2345.23	2920.18	2726.69	2173.34	2485.97		56.603	1673.57	2150.17	1789.14	2012.11
56.9341	2058.29	2078.51	2263.11	1775.34	2189.66	1330.42	1055.93	1602.36	1879.2		56.9341	2440.82	2521.09	2458.66	2700.58		56.9341	2609.23	2799.58	2489.82	2648.09	2458.84		56.9341	2418.03	2520.68	3001.2	2500.34	3243.72		56.9341	2128.05	2095.47	1871.55	2174.69	2145.94		56.9341	2270.66	2819.39	2707.68	2126.47	2388.84		56.9341	1596.29	2090.29	1706.23	1974.34
57.2651	2021.71	2040.13	2190.17	1714.29	2184.89	1312.39	1040.26	1566.37	1886.72		57.2651	2353.63	2444.72	2434.17	2604.69		57.2651	2518.66	2749.87	2424.72	2576.37	2380.34		57.2651	2326.96	2501.32	2925.61	2435.74	3191.44		57.2651	2128.22	2052.72	1835.19	2140.13	2180.05		57.2651	2197.06	2709.91	2677.87	2077.51	2296.8		57.2651	1531.89	2030.24	1636.31	1947.57
57.5961	1981.08	2005.49	2125.23	1650.34	2175.33	1294.53	1023.42	1530.29	1902.29		57.5961	2276.33	2380.33	2407.71	2508.74		57.5961	2432.05	2693.26	2353.62	2497.77	2317.7		57.5961	2247.88	2472.12	2846.18	2371.29	3124.93		57.5961	2124.3	2012.1	1803.82	2089.49	2197.97		57.5961	2125.41	2598.3	2638.27	2023.55	2214.75		57.5961	1480.47	1973.22	1583.21	1933.73
57.9271	1933.42	1972.48	2065.4	1585.49	2158.7	1276.59	1002.7	1493.1	1919.99		57.9271	2210.4	2327.01	2378.3	2414.73		57.9271	2351.5	2631.67	2278.7	2415.29	2270.32		57.9271	2181.78	2432.02	2762.72	2305	3044.28		57.9271	2112.28	1975.3	1776.74	2022.88	2195.88		57.9271	2054.92	2485.93	2589.71	1965.48	2143.81		57.9271	1443.01	1922.23	1548.09	1931.89
58.2581	1878.82	1940.26	2010.69	1519.64	2132.9	1258.64	979.794	1455.79	1937.54		58.2581	2160.69	2281.87	2345.03	2324.66		58.2581	2277.9	2565.32	2203	2332.85	2236.92		58.2581	2128.88	2382.12	2674.53	2237.79	2948.67		58.2581	2089.47	1941.41	1753.76	1943.08	2176.57		58.2581	1986.51	2378.51	2532.28	1904.18	2086.97		58.2581	1417.64	1880.27	1527.85	1943.95
58.5891	1817.39	1905.91	1958.11	1454.8	2094.21	1239.7	952.106	1417.47	1950.02		58.5891	2127.11	2241.94	2308.49	2237.74		58.5891	2213.47	2495.99	2130.32	2253.44	2215.6		58.5891	2087.97	2325.35	2583.45	2169.58	2842.7		58.5891	2055.55	1908.42	1732.9	1853.4	2140.23		58.5891	1919.07	2276.13	2466.79	1840.87	2043.15		58.5891	1402.35	1847.59	1520.59	1968.02
58.9201	1750.05	1868.32	1906.44	1391.08	2042.55	1219.86	922.11	1380.12	1953.3		58.9201	2109.66	2204.12	2266.08	2153.99		58.9201	2157.23	2425.7	2061.88	2179.96	2201.38		58.9201	2057.96	2262.59	2487.48	2100.56	2726.77		58.9201	2011.63	1874.33	1715.18	1756.62	2091.75		58.9201	1851.84	2181.59	2392.33	1777.41	2011.23		58.9201	1395.15	1826.97	1522.21	2001.97
59.2511	1678.93	1827.68	1853.68	1329.26	1976.79	1198.92	888.226	1342.76	1943.49		59.2511	2106.36	2165.43	2219.26	2073.54		59.2511	2111.21	2354.55	1999.58	2113.5	2190.27		59.2511	2035.16	2197.85	2388.63	2031.55	2603.77		59.2511	1958.94	1838.11	1698.71	1660.62	2032.36		59.2511	1784.59	2094.08	2311.68	1714.81	1989.32		59.2511	1393.95	1815.78	1528.9	2041.92
59.5821	1607.81	1782	1798.16	1270.56	1899.93	1175.98	852.233	1305.49	1920.56		59.5821	2113.98	2124.65	2166.45	1996.32		59.5821	2074.18	2285.34	1945.21	2054.08	2179.27		59.5821	2017.14	2132.14	2286.02	1964.53	2477.84		59.5821	1903.38	1797.77	1683.16	1567.73	1965.93		59.5821	1715.69	2012.6	2225.82	1654.28	1974.3		59.5821	1396.97	1814.71	1536.58	2083.98
59.9132	1538.92	1732.4	1741.56	1216.64	1814.08	1151.04	814.36	1269.2	1882.52		59.9132	2127.64	2079.12	2108.52	1921.57		59.9132	2044.52	2217.91	1898.88	2002.43	2165.16		59.9132	2002	2067.32	2180.56	1899.64	2350.08		59.9132	1847.96	1753.4	1667.76	1483.72	1894.48		59.9132	1646.8	1937.04	2136.6	1595.72	1961.16		59.9132	1401.12	1819.01	1542.48	2123.92
60.2442	1474.18	1680.89	1685.73	1167.71	1722.99	1123.97	777.247	1234.78	1832.22		60.2442	2142.08	2029.49	2045.22	1849.97		60.2442	2020	2153.38	1858.58	1957.68	2144.18		60.2442	1985.71	2005.52	2074.01	1838.75	2226.29		60.2442	1799.56	1703.01	1650.41	1412.58	1820.25		60.2442	1577.05	1865.38	2046.25	1540.12	1947.77		60.2442	1405.53	1826.45	1545.37	2156.97
60.5752	1416.45	1629.35	1630.77	1125.66	1630.89	1093.03	739.38	1201.59	1771.03		60.5752	2153.17	1976.76	1977.9	1783.54		60.5752	2000.63	2091.62	1823.31	1918.82	2116.2		60.5752	1967.15	1944.61	1966.62	1782.62	2106.83		60.5752	1760.2	1646.73	1629.23	1357.42	1745		60.5752	1508.45	1794.87	1958.49	1485.75	1929.35		60.5752	1409.85	1833.18	1544.38	2178.03
60.9062	1364.88	1578.05	1578.95	1090.47	1541.65	1059.95	703.39	1171.4	1702.69		60.9062	2154.25	1920.04	1907.43	1722.27		60.9062	1981.43	2031.59	1791.82	1885.55	2080.36		60.9062	1944.56	1885.83	1859.39	1729.74	1995.62		60.9062	1732.99	1585.57	1604.96	1319.25	1669		60.9062	1440.88	1727	1875.7	1433.22	1904.79		60.9062	1411.44	1837.1	1538.52	2184.95
61.2372	1320.33	1529	1533.74	1062	1458.4	1023.87	668.401	1144.06	1630.34		61.2372	2143.94	1861.34	1835.93	1667.06		61.2372	1962.4	1972.41	1760.48	1855.27	2038.39		61.2372	1916.67	1828.66	1754.07	1681.73	1894.53		61.2372	1719.68	1521.4	1575.73	1297.8	1595.27		61.2372	1376.33	1659.27	1799.6	1380.93	1872.2		61.2372	1411.07	1835.06	1527.8	2174.87
61.5682	1281.81	1482.95	1496.23	1040.51	1383	985.644	636.274	1119.85	1556.23		61.5682	2117.47	1801.64	1765.27	1618.62		61.5682	1941.15	1915.67	1728.89	1829.56	1990.58		61.5682	1883.73	1772.49	1651.78	1634.86	1805.58		61.5682	1718.4	1454.36	1541.55	1289.6	1525.41		61.5682	1313.95	1592.55	1731.44	1329.63	1830.71		61.5682	1406.73	1826.08	1514.23	2145.78
61.8992	1247.17	1440.17	1465.7	1022.98	1316.58	945.404	605.421	1099.49	1484.12		61.8992	2074.83	1741.97	1695.86	1576.21		61.8992	1915.21	1858.74	1693.32	1805.81	1938.91		61.8992	1845.6	1717.17	1553.39	1588.86	1727.91		61.8992	1725.86	1386.46	1503.26	1292.25	1459.84		61.8992	1255.32	1526.7	1671.23	1279.46	1781.21		61.8992	1399.28	1810.02	1497.83	2097.83
62.2302	1214.56	1401.13	1442.86	1007.58	1258.28	904.294	577.432	1081.26	1414.15		62.2302	2017.01	1684.16	1631.42	1539.69		62.2302	1884.89	1801.75	1653.62	1784.87	1887.12		62.2302	1803.41	1661.84	1462.02	1541.86	1663.27		62.2302	1739.2	1320.71	1462.87	1301.01	1401.29		62.2302	1200.56	1463.72	1616.39	1232.13	1723.97		62.2302	1388.72	1786.71	1480.3	2032.87
62.5613	1180.82	1363.38	1425.12	994	1207.82	863.884	552.294	1064.88	1348.18		62.5613	1944.29	1627.5	1572.12	1507.91		62.5613	1847.74	1745.42	1608.07	1765.88	1835.64		62.5613	1758.17	1607.35	1377.53	1492	1608.79		62.5613	1753.25	1257.82	1422.36	1311.62	1350.62		62.5613	1148.67	1401.88	1566.52	1187.09	1660.88		62.5613	1374.18	1756.29	1463.65	1952.77
62.8923	1144.95	1327.49	1411.19	978.699	1161.64	825.452	530.301	1048.63	1285.51		62.8923	1860.4	1572.71	1518.25	1478.14		62.8923	1804.33	1688.01	1557.23	1747.7	1788.19		62.8923	1709.88	1554.68	1302.77	1439	1564.34		62.8923	1761.14	1200.1	1384.71	1318.51	1308.96		62.8923	1099.79	1344.9	1517.07	1147.74	1593.78		62.8923	1357.36	1719.75	1448.16	1861.66
63.2233	1104.08	1291.46	1397.23	960.538	1119.3	788.154	510.308	1031.38	1226.7		63.2233	1769.46	1519.77	1470.38	1450.23		63.2233	1754.78	1631.54	1501.55	1729.61	1744.77		63.2233	1658.68	1503.15	1238.01	1383.15	1527.46		63.2233	1759.86	1149.23	1350.93	1319.39	1277.16		63.2233	1053.61	1291.08	1464.91	1112.69	1524.84		63.2233	1337.39	1679.77	1435.54	1762.7
63.5543	1058.05	1253.58	1380.53	938.37	1078.11	753	494.158	1010.96	1170.05		63.5543	1673.79	1467.99	1427.53	1422.32		63.5543	1699.93	1574.16	1442.72	1707.64	1705.53		63.5543	1605.44	1453.59	1184.25	1324.16	1494.9		63.5543	1746.09	1104.68	1322.31	1311.26	1253.36		63.5543	1010.42	1242.26	1409.07	1082.48	1454.22		63.5543	1318.1	1634.63	1427.78	1661.73
63.8853	1007.03	1214.55	1358.82	911.678	1036.75	720.678	480.161	985.849	1117.25		63.8853	1577.26	1416.38	1388.16	1392.42		63.8853	1640.76	1516.87	1382.73	1681.46	1669.32		63.8853	1549.47	1406.01	1142.35	1265	1465.03		63.8853	1716.44	1068.84	1300.54	1293.13	1238.41		63.8853	969.908	1198.29	1347.4	1057.1	1384.78		63.8853	1297.97	1588.16	1424.02	1562.61
64.2163	951.849	1172.68	1329.23	881.836	994.534	690.671	469.164	954.904	1066.47		64.2163	1483.71	1366.62	1351.66	1361.37		64.2163	1578.25	1459.86	1322.89	1647.56	1635.99		64.2163	1489.79	1360.58	1111.44	1206	1435.85		64.2163	1671.26	1041.16	1284.62	1264.99	1230.47		64.2163	932.534	1159.64	1279.92	1034.04	1317.21		64.2163	1279.33	1538.51	1424.27	1470.32
64.5473	892.825	1127.83	1290.13	848.336	951.483	662.832	460.168	918.966	1018.85		64.5473	1395.31	1316.2	1316.01	1327.65		64.5473	1512.54	1404.15	1265.72	1603.97	1601.85		64.5473	1427.1	1317.13	1090.36	1150.83	1403.99		64.5473	1612.03	1021.5	1273.69	1227.34	1227.18		64.5473	898.979	1125.85	1207.46	1010.98	1252.82		64.5473	1262.66	1488.66	1429.2	1388.01
64.8783	834.63	1081.63	1243.21	813.685	909.089	637.829	452.171	878.206	974.911		64.8783	1312.89	1266.62	1278.37	1290.95		64.8783	1445.62	1349.75	1211.53	1550.35	1564.57		64.8783	1359.73	1273.35	1078.28	1100.83	1369.97		64.8783	1540.74	1009.03	1265.77	1184.37	1226.23		64.8783	867.404	1096.23	1132.03	987.089	1191.63		64.8783	1247.8	1438.77	1436.28	1317.68
65.2094	777.603	1032.78	1189.28	779.223	868.856	614	446.175	833.634	934.794		65.2094	1236.63	1216.07	1238.57	1251.25		65.2094	1378.49	1297.68	1162.16	1485.06	1522.14		65.2094	1288.52	1230.59	1073.02	1057.48	1331.95		65.2094	1462.22	1003.4	1257.67	1136.57	1226.27		65.2094	839.808	1071.27	1056.81	959.206	1135.13		65.2094	1234.08	1390.03	1444.37	1260.35
65.5404	724.753	981.932	1130.55	745.781	830.616	592	439.178	787.904	898.849		65.5404	1166.55	1166.52	1195.6	1207.75		65.5404	1311.32	1248.15	1116.77	1409.95	1472.56		65.5404	1214.67	1188.01	1069.92	1021.29	1288.93		65.5404	1379	1001.78	1246.74	1088.78	1224.32		65.5404	813.37	1048.49	985.26	926.507	1083.64		65.5404	1222.15	1344.08	1451.45	1216.82
65.8714	678.548	931.092	1069.19	715.178	796.551	571.182	432	741.37	866.723		65.8714	1102.28	1116.17	1149.45	1162.09		65.8714	1246.27	1202.64	1075.17	1326.83	1414.81		65.8714	1138.2	1144.83	1068.81	991.274	1241.27		65.8714	1296.73	1003.18	1232.63	1043.18	1218.54		65.8714	787.281	1026.72	919.733	888.003	1036.18		65.8714	1210.19	1302.46	1457.36	1184.27
66.2024	639.706	879.445	1008.86	685.774	767.301	551.37	422.815	696.856	839.404		66.2024	1043.38	1067.47	1099.11	1111.63		66.2024	1182.37	1159.52	1036.55	1238.08	1349.88		66.2024	1061.75	1100.67	1064.7	967.075	1190.63		66.2024	1218.6	1005.59	1213.33	1001.4	1207.77		66.2024	762.007	1004.77	863.041	844.521	994.37		66.2024	1197.38	1268.01	1458.44	1159.89
66.5334	607.87	828.623	952.363	659.825	742.044	533.377	411.623	656.363	816.884		66.5334	989.291	1018.78	1045.75	1059		66.5334	1121.62	1120.43	999.709	1147.54	1277.77		66.5334	987.336	1057.36	1056.58	948.058	1136.81		66.5334	1147.8	1006.01	1188.01	964.014	1190.39		66.5334	735.914	982.637	816.986	795.058	956.753		66.5334	1181.73	1241.54	1454.33	1141.49
66.8644	584.041	779	901.89	634.26	721.164	515.384	398.233	619.699	797.534		66.8644	940.397	970.904	991.808	1002.38		66.8644	1064.04	1082.77	963.836	1059.01	1200.64		66.8644	915.329	1012.47	1042.26	929.233	1080.19		66.8644	1086.36	1005.07	1156.49	933.26	1167.64		66.8644	708.014	958.493	781.315	742.808	925.575		66.8644	1162.44	1224.44	1444.22	1125.08
67.1954	566.219	731.39	857.243	610.318	704.096	498.195	382.219	588.048	780.976		67.1954	896.51	924.832	937.219	944.39		67.1954	1009.02	1046.76	928.123	975.51	1121.51		67.1954	848.168	968.219	1019.12	911.414	1021.59		67.1954	1035.9	999.123	1119.15	906.709	1138.1		67.1954	679.12	932.147	757.072	688.586	899.586		67.1954	1139.53	1216.53	1426.9	1108.85
67.5264	552.603	685.794	819.61	586.377	688.425	480.199	363.205	561.014	767.199		67.5264	857.829	882.356	884.61	883.794		67.5264	958.206	1009.98	893.384	899.829	1042.38		67.5264	786.24	923.801	988.979	891.801	963.192		67.5264	994.027	988.979	1077.59	884.774	1102.57		67.5264	648.432	904.589	742.021	635.192	879.596		67.5264	1112.84	1218.64	1402.38	1088.82
67.8575	542	643.808	786.99	561.435	673.767	463	342.99	538.979	754.596		67.8575	825.161	842.062	834.979	823.808		67.8575	912.596	972.839	858.616	833.363	966.233		67.8575	731.353	880	950.829	869.202	905.414		67.8575	960.363	972.829	1034.01	866.041	1062.85		67.8575	616.959	875.01	733.767	583.616	866.202		67.8575	1082.35	1227.95	1370.63	1065.78
68.1885	532.206	604.233	758.178	535.493	659.123	445.795	321.973	518.945	743.562		68.1885	798.712	806.137	788.534	764.822		68.1885	870.411	932.726	825.027	777.712	894.877		68.1885	681.507	836.206	906.671	842.822	849.644		68.1885	932.712	952.466	989.411	847.315	1019.93		68.1885	585.301	844.411	729.712	535.26	857		68.1885	1050.1	1242.48	1331.64	1038.15
68.5195	522.418	568.253	730.373	510.134	642.702	428.582	299.955	502.493	731.911		68.5195	779.075	774.387	747.075	707.836		68.5195	834.253	890.223	791.836	731.075	828.925		68.5195	637.493	792.418	857.507	813.253	795.88		68.5195	907.493	926.089	946.791	829.178	975.014		68.5195	555.658	813.791	728.658	492.716	852.582		68.5195	1015.28	1260.03	1285.63	1007.75
68.8505	509.849	535.274	703.363	484.973	624.514	411.363	278.938	486.24	718.452		68.8505	765.664	748.185	709.815	653.849		68.8505	802.911	844.521	759.637	692.664	770.973		68.8505	598.726	749.637	806.336	780.911	745.123		68.8505	883.089	895.699	905.575	810.034	930.884		68.8505	527.24	784.151	727.39	455.973	850.363		68.8505	980.514	1277.6	1233.58	975.363
69.1815	496.079	504.295	674.353	460.589	604.137	393.568	258.353	470.979	703.764		69.1815	758.058	727.942	675.548	602.863		69.1815	776.805	796.394	727.863	661.842	721.021		69.1815	564.784	708.432	755.158	746.589	699.158		69.1815	856.706	862.294	869.353	788.668	887.531		69.1815	502.627	754.706	724.116	425.236	849.921		69.1815	946.353	1291.2	1176.49	943.216
69.5125	479.534	477.096	641.342	439.192	581.781	376.342	239.562	455.493	686.274		69.5125	755.027	712.658	644.493	556.877		69.5125	754.507	746.26	697.315	636.027	679.068		69.5125	534.877	668.438	705.973	711.068	657.411		69.5125	828.342	825.877	838.123	766.068	847.384		69.5125	481.027	726.247	718.616	400.288	848.466		69.5125	912.438	1298.81	1114.59	913.658
69.8435	460.781	451.89	605.332	421.003	558.445	359.555	222.777	439.216	665.993		69.8435	754.219	701.555	615.438	514.113		69.8435	735.007	695.675	667.781	613.997	645.116		69.8435	509.558	630.668	660.003	676.339	621.226		69.8435	796.777	786.89	813.11	741.449	811.229		69.8435	462.442	698.997	708.548	381.339	844.442		69.8435	880.336	1298.66	1050.66	887.336
70.1745	440.034	428.678	566.322	406.582	533.904	343.548	207.226	422.932	640.932		70.1745	753.966	694.644	586.61	475.356		70.1745	718.294	646.294	639.034	594.966	618.39		70.1745	486.486	594.678	618.808	643.39	590.26		70.1745	762.226	747.904	793.322	714.582	781.068		70.1745	446.644	672.966	695.027	367.616	837.418		70.1745	849.034	1290.1	985.158	865.034
70.5055	418.524	408.459	524.541	395.377	509.377	327.541	194.459	405.099	612.87		70.5055	751.935	690.476	557.788	440.377		70.5055	700.589	600.212	610.524	576.164	598.671		70.5055	467.212	561.918	581.836	611.671	565.294		70.5055	726.459	708.918	779.541	687.688	757.901		70.5055	432.082	647.164	677.723	357.671	825.623		70.5055	819.294	1272.77	919.099	848.294
70.8366	396.562	390	482.301	388.932	485.397	311.767	182.699	387.808	580.274		70.8366	747.438	686.74	529.973	407.63		70.8366	681.658	558.329	582.794	559.137	584.726		70.8366	450.493	531.164	550.63	583.493	544.562		70.8366	690.233	670.164	769.534	661.767	740.726		70.8366	419.068	621.603	657.644	350.726	809.836		70.8366	789.562	1246.47	855.041	836.562
71.1676	373.599	373.764	440.527	385.709	461.418	297	172.945	369.983	545.692		71.1676	738.456	682.219	501.401	378.654		71.1676	658.726	520.654	555.308	542.346	575.544		71.1676	435.781	504.182	523.418	557.308	530.599		71.1676	654.473	632.418	762.764	635.818	730.017		71.1676	405.291	596.818	635.329	346.017	790.055		71.1676	759.599	1213.71	793.692	828.363
71.4986	350.637	358.521	400.521	385.479	438.199	282.76	165.199	352.404	509.123		71.4986	723.685	674.925	473.842	352.678		71.4986	632.555	488.719	527.356	527.562	568.596		71.4986	422.836	479.438	499.438	534.877	519.877		71.4986	621.24	596.678	757.521	612.842	725.075		71.4986	391.521	572.281	612.247	342.075	767.521		71.4986	729.637	1174.96	735.603	822.918
71.8296	327.675	345.271	363.757	387.243	415.973	268	158.459	335.596	471.568		71.8296	702.894	664.38	448.298	328.702		71.8296	601.377	462.757	500.161	513.784	564.161		71.8296	412.404	456.945	479.216	514.432	512.918		71.8296	591	562.188	751.514	591.082	725.134		71.8296	377.271	547.757	588.921	339.134	743.514		71.8296	699.432	1131.22	683.541	818.216
72.1606	305.712	333.26	332.753	389.247	394.74	254	153.479	320.795	435.027		72.1606	676.082	648.562	424.767	308.726		72.1606	566.945	441.26	472.959	501.014	557.959		72.1606	404.205	437.973	460.479	496.973	509.959		72.1606	564.753	530.466	742.507	572.548	727.438		72.1606	362.26	524	565.082	334.945	718		72.1606	669.973	1085.99	637	813.247
72.4916	284.5	321.25	306.75	391	376	240	149.5	306.5	399.5		72.4916	644.5	628.5	405.25	291.75		72.4916	530.5	423	445.75	489.5	551.25		72.4916	397.5	420.25	443.5	482.25	508		72.4916	542.5	500.5	730.25	556	729.75		72.4916	346.25	500.5	541.25	329	693.25		72.4916	640.75	1039	597.25	805.5
72.8226	264.281	310.24	286	391	358.747	226.747	146.521	294.719	366.986		72.8226	607.904	604.692	388.747	278.521		72.8226	492.295	408.479	418.281	478	541.521		72.8226	392.774	405.281	427.267	468.76	506.788		72.8226	524.733	471.788	712.986	540.945	730.815		72.8226	331.733	478.253	517.678	320.801	669.507		72.8226	612.521	992.253	564.788	795.226
73.1536	245.312	298.486	271	388.743	343.229	213.743	144.541	283.202	336.486		73.1536	567.551	577.147	375.514	268.541		73.1536	454.825	396.459	391.055	466.514	528.514		73.1536	389.284	391.568	411.284	456.257	505.568		73.1536	510.459	444.568	690.716	527.634	728.137		73.1536	317.459	455.514	494.12	311.596	647.514		73.1536	586.284	946.743	540.366	781.918
73.4846	228.082	286.479	260	382.74	330.699	201.74	142.562	273.699	310.479		73.4846	524.452	548.356	365.781	261.562		73.4846	420.342	385.438	365.562	453.301	512.74		73.4846	386.521	379.863	394.301	444	504.082		73.4846	498.918	419.342	663.699	513.836	719.945		73.4846	304.178	434.26	470.315	300.123	626.781		73.4846	562.301	903.959	522.726	764.096
73.8157	212.846	273	252	372.473	319.682	190.736	141.582	264.945	287.736		73.8157	480.616	517.836	359.318	258.582		73.8157	388.11	374.682	341.055	438.582	494.945		73.8157	384	369.637	377.055	432.736	500.582		73.8157	490.363	396.11	632.418	499.045	704.747		73.8157	293.627	413.264	446.781	285.901	606.527		73.8157	542.055	864.418	512.12	743.253
74.1467	199.87	259.267	246.267	357.733	311.397	181.466	140.603	256.466	269		74.1467	437.055	488.596	353.603	257.603		74.1467	359.87	364.932	318.068	420.404	475.13		74.1467	381.466	359.671	359.068	421.199	494.801		74.1467	482.795	374.603	597.664	483.26	682.541		74.1467	284.329	392.267	423.26	271.404	585.801		74.1467	523.801	829.596	508.747	719.39
74.4777	189.353	244.812	242	340.188	304.836	172.459	138.623	248.729	254		74.4777	394.507	460.377	348.164	258.623		74.4777	335.623	354.459	297.541	399.705	455.295		74.4777	377.188	349.705	339.812	408.918	486.271		74.4777	476.212	355.082	562.377	464.483	653.329		74.4777	276.024	372	398.753	256.164	564.812		74.4777	508.082	800.024	510.387	693.048
74.8087	180.37	230.822	237.726	318.178	298.808	164.452	136.37	240	242.274		74.8087	353.521	435.178	342.74	261.37		74.8087	314.37	345	280.548	375.74	434.986		74.8087	371.63	340.74	320.548	396.63	474.452		74.8087	468.616	338.274	526.63	442.712	619.11		74.8087	268.712	352.726	374.986	240.644	541.822		74.8087	494.822	775.164	516.041	665.699
75.1397	173.387	217.387	232	294.89	293.503	156.723	133.387	230.277	233.277		75.1397	316.284	411.723	336.051	263.387		75.1397	295.387	335.277	266.277	348.774	414.949		75.1397	362.336	330.774	300.277	384.613	459.336		75.1397	461.007	323.277	492.613	419.226	581.606		75.1397	261.394	333.723	352.226	226.387	516.832		75.1397	483.555	754.562	524.877	637.62
75.4707	168.123	205.685	226	269.877	287.473	150	129.404	220.281	227.281		75.4707	282.068	390.562	328.089	265.404		75.4707	277.404	326.123	255	319.808	396.911		75.4707	350.315	321.527	280	373.315	440.034		75.4707	450.945	310.719	461.877	394.473	542.37		75.4707	255.068	315.719	330.473	213.123	489.123		75.4707	472.562	737.226	535.706	610.541
75.8017	164.137	196.274	218	244.579	280.442	144	124.137	208.853	223.284		75.8017	251.873	370.137	317.695	266.137		75.8017	259.421	318.421	246.716	290.842	378.442		75.8017	335.295	311.274	260.716	362.01	418.158		75.8017	439.599	300.432	435.147	368.726	504.127		75.8017	248.021	299.716	310.726	201.568	460.137		75.8017	462.284	721.452	546.243	585.031
76.1328	160.863	189.301	209	219.849	271.411	138.288	117.863	196.863	219.288		76.1328	224.699	350.726	305.74	265.863		76.1328	241.151	311.014	241.425	262.301	361.986		76.1328	317.274	301.301	241.425	351.274	392.836		76.1328	426.534	291.137	412.425	342.986	468.452		76.1328	239.973	284.712	292.274	191.575	431.151		76.1328	451.288	706.11	555.767	562.959
76.4638	158.164	183.911	199	196.545	260.38	132.291	110.873	183.873	216.291		76.4638	202.253	331.038	291.075	262.582		76.4638	222.164	305.329	237.127	236.038	345.545		76.4638	297.545	292.038	223.127	341.962	365.507		76.4638	411.76	282.127	394.418	319.253	437.202		76.4638	230.507	271	276.253	183.582	403.164		76.4638	439	689.342	563.695	545.178
76.7948	156.178	180.945	188.295	175.527	246.938	126.589	102.589	171.884	213.295		76.7948	183.527	310.651	275.829	257.589		76.7948	202.178	301.945	234.116	212.062	328.705		76.7948	275.822	282.767	205.822	333.233	336.466		76.7948	394.993	273.822	379.705	298.527	411.24		76.7948	221.466	259.295	263.527	177.589	376.884		76.7948	425	670.288	568.89	531.404
77.1258	154.192	179.979	178.298	156.51	232.616	120.596	94.2979	158.894	210		77.1258	168.106	289.682	259.873	251		77.1258	182.192	299.277	231.106	191.49	311.596		77.1258	253.808	274.49	190.51	325.212	306.723		77.1258	377.829	264.808	368.702	279.808	389.277		77.1258	211.021	248.596	252.51	172.894	353.894		77.1258	409.702	647.531	572.767	523.339
77.4568	152.205	179.315	167.603	140.493	216.89	114.603	85.3014	146.904	205		77.4568	155.397	268.712	244.616	243.699		77.4568	162.205	298.616	228.096	174.507	294.205		77.4568	232.096	267.205	176.493	317.192	278.685		77.4568	360.384	253.795	360	265.096	371.616		77.4568	201.288	239.904	243.096	169.904	335.904		77.4568	391.699	621.082	573.616	521.274
77.7878	149.219	178.658	158.914	126.476	200.476	108.914	77	136.914	198		77.7878	145.695	247.743	229.353	234.695		77.7878	142.219	297.962	224.781	161.219	276.134		77.7878	211.39	260.219	164.171	308.866	251.257		77.7878	342.257	242.476	353	252.39	356.658		77.7878	191.562	232.219	236.39	167.914	322.61		77.7878	371.39	592.342	572.134	523.209
78.1188	145.233	177.699	150.541	114.459	185.459	103.616	68.6918	127.925	189		78.1188	137.692	227.466	215.082	226.384		78.1188	124.925	298.007	220.075	150.541	257.774		78.1188	192.692	252.925	153.151	300.151	227.534		78.1188	325.151	228.459	346	242.384	344.007		78.1188	182.842	226.233	231.384	165.541	314		78.1188	349.384	559.918	569.616	529.144
78.4498	140.247	175.428	143.87	104.753	170.753	98.6233	60.6884	120.623	178.688		78.4498	130.688	209.182	202.116	217.688		78.4498	108.935	298.051	214.065	143.247	239.116		78.4498	176	245.935	142.442	290.818	206.13		78.4498	308.065	213.442	339.312	233.377	331.74		78.4498	174.442	220.558	226.688	163.247	308.688		78.4498	326.065	526.884	564.377	537.079
78.7808	134.26	171.466	138.89	96.7397	157.37	93.6301	53.6849	114.63	167.37		78.7808	125	192.89	191.521	209.685		78.7808	95.9452	296.096	207.37	137.26	220.466		78.7808	161	238.945	133.425	279.795	188.425		78.7808	292.685	197.425	332	224.685	317.781		78.7808	167.74	216.575	222.685	159.575	305.685		78.7808	302.055	493.164	557.11	546.014
79.1119	127.274	166.185	134.229	90.0445	145.682	89.3185	47	109.955	155.363		79.1119	119	179.592	182.229	202.682		79.1119	84.9555	292.14	199.363	132.592	203.503		79.1119	148	230.955	124.408	267.771	173.726		79.1119	277.318	181.089	323.318	216.682	302.822		79.1119	161.363	212.592	219.682	155.592	304.045		79.1119	278.045	461.452	547.134	552.586
79.4429	120.288	158.897	131.253	85.0342	135.678	86	41	106.644	142.678		79.4429	114	168.288	174.932	196		79.4429	76.9658	286.185	190.678	128.61	186.541		79.4429	136.322	221.966	116.712	254.747	162.034		79.4429	262.966	164.39	313.322	206.678	286.541		79.4429	156.356	209.288	215.678	149.61	302.712		79.4429	254.356	431.425	536.137	554.849
79.7739	112.301	150.603	128.603	80.3493	127.675	82.6747	36	103.651	130.675		79.7739	109	160.976	168.627	191		79.7739	70.976	277.904	181	125.627	171.928		79.7739	127.325	212.976	109.024	241.048	153.349		79.7739	249.301	149.373	303.325	196	268.579		79.7739	151.675	206.976	211	143.301	299.373		79.7739	233.024	403.723	522.12	551.771
80.1049	104.315	142.301	126.63	77.3425	121	79.6712	32	100.658	119.342		80.1049	103	155.986	163.315	187.329		80.1049	66.9863	267.288	170.329	121.644	157.63		80.1049	119.329	203.315	102.014	227.027	146.671		80.1049	235.644	134.685	291.658	185	249.288		80.1049	148	203.658	205	135.315	293.356		80.1049	213.342	379.699	505.74	541.384
80.4359	96.9966	132.993	125.325	74.6678	114.332	76.6678	28.3322	97.6644	109.668		80.4359	98	152.664	158.997	183.664		80.4359	63.9966	254.99	160.332	118.329	145.325		80.4359	112.664	194.329	95.3356	213.007	142		80.4359	223.661	122.339	279.664	173	228.322		80.4359	144	201.332	198	127.329	283.671		80.4359	196.336	359.675	488.021	522.675
80.7669	90.0069	124.678	124.014	73	108.336	74.6644	25.3356	94.6712	100.664		80.7669	93	150.336	154.671	181.671		80.7669	63.0069	241.685	150	114.342	134.678		80.7669	107.336	185.342	89.6644	199.322	138		80.7669	211.678	111.658	267.336	160	207.685		80.7669	140.336	198	190	118.007	271.658		80.7669	181.329	341.986	467.959	496.658
81.0979	85.0171	117.017	122.034	72	102.339	71.661	23.339	90.6781	94		81.0979	87.339	149	151.339	179.678		81.0979	62.3562	227.373	140	110.017	125.356		81.0979	102.339	177.356	84.3219	187.305	135.339		81.0979	201.356	103.644	254.339	148	187.373		81.0979	136.678	194.322	180	109.678	256.322		81.0979	169.322	327.966	447.558	462.661
81.4289	81.0274	110.027	120.712	70.3425	96.3425	69.3151	20.6849	85.6849	89		81.4289	82.3425	147	147	178.685		81.4289	63.0274	213.712	130.342	104.685	117.027		81.4289	98.3425	170.37	79.6575	175.63	133.342		81.4289	191.027	96.9726	242	136	168.397		81.4289	132.685	189.973	169	102.342	238		81.4289	159.658	315.945	426.493	424.342
81.7599	78.6918	104.346	118.384	69.6918	89.3459	66.6541	18.6918	80.6918	85.3459		81.7599	78.3459	145	143	177.692		81.7599	64.0377	201.038	122	99.6918	110.692		81.7599	94.3459	164.384	75.6541	166.271	130.692		81.7599	181.038	92.3082	228.654	125.654	150.075		81.7599	128.692	184.616	157	95.3459	218.346		81.7599	151	305.271	405.428	382.384
82.091	76.6986	99.3493	115.048	69.6986	82.6986	63.6507	17.3493	75.3493	83.3493		82.091	74.3493	141.651	138.651	177.048		82.091	66.0479	188.699	114	95	104.349		82.091	91	159.747	72.3014	157.603	128.699		82.091	171.699	89.6507	215.651	116.651	134.096		82.091	124.048	178.603	144	90	197.048		82.091	145	295.603	384.712	339.747
82.422	75.7055	95	111.058	69.0582	75.7055	60.6473	15.3527	69.3527	83.3527		82.422	71.3527	137	133.647	176.058		82.422	68.0582	178.353	106.647	90	99.3527		82.422	88	156.411	69.2945	150.589	126.058		82.422	163.353	87.6473	203.295	109.647	120.764		82.422	119.058	172.236	131.353	85.6473	175.411		82.422	139.353	285.589	365.651	297.764
82.753	75.7123	92	106.712	69.0685	69.0685	57	13.7123	63.3562	83.3562		82.753	68.7123	131.644	129.288	174.068		82.753	70.7123	170	100.644	86.6438	95		82.753	86	153.068	66.9315	145.575	122.068		82.753	156	87	190.288	103.644	108.781		82.753	114.425	165.219	119	81.6438	155.137		82.753	134.712	274.575	347.589	259.137
83.084	75.3596	88.6404	101.719	68.0788	62.7192	54	12.3596	57.3596	85.3596		83.084	66.7192	125.64	123.64	171.079		83.084	73.7192	161.64	94.6404	84.2808	91		83.084	84.3596	150.719	64.9212	140.562	117.079		83.084	149	86.3596	178.921	99.2808	99.7979		83.084	109.079	157.202	106.36	79.6404	136.158		83.084	130.719	261.921	329.887	224.798
83.415	74.363	85.637	95.363	68.089	57.089	51	11.363	51.363	87.363		83.415	65.089	119.637	118.637	167.089		83.415	77.363	155.274	89.637	82.911	87.363		83.415	84	147.363	62.911	135.911	112.089		83.415	142.637	86.363	167.911	95.911	92.8151		83.415	103.452	149.185	95.363	76.637	118.178		83.415	126.089	247.274	313.192	196.178
83.746	73.3664	83.6336	89.3664	67.0993	51.7329	47.3664	10.3664	46	89.3664		83.746	64.0993	113.267	113.267	161.466		83.746	80.3664	149.901	84.6336	82.5342	84		83.746	84	143.366	61.2671	131.901	105.733		83.746	137.634	86	157.534	93.9007	87.4658		83.746	98.4658	140.168	85.3664	74.6336	102.565		83.746	122.099	231.267	296.503	173.466
84.077	70.3699	81.6301	83	67.1096	47.1096	44.3699	9	41	92.3699		84.077	65.1096	106.26	107.26	153.479		84.077	83.6301	145.26	81.2603	83.5205	80.3699		84.077	85	139	60.2603	128.521	98.7397		84.077	132.63	85.3699	147.89	92.5205	84.4795		84.077	93.1096	131.521	76.7397	72	89.2192		84.077	117.479	214.26	279.822	155.849
84.408	68	79.2534	76.3733	66.1199	42.7466	42.3733	8	37	94		84.408	66.1199	100.253	102.253	144.493		84.408	86.6267	141.88	77.6267	85.5069	77.3733		84.408	86	134	59.2534	124.88	90.7466		84.408	129.253	84.3733	139.88	91.1336	82.4931		84.408	87.4931	123.88	69.7466	69.3733	78.2397		84.408	112.493	195.627	262.147	143.493
84.7391	64	77.2466	70	64.7534	38.7534	40.3767	7	33	95.3767		84.7391	67.5069	95.2466	96.2466	132.884		84.7391	88.2466	139.247	74.6233	88.1164	74		84.7391	88	127.623	59.2466	121.87	83.7534		84.7391	126.247	83.3767	133.493	89.7397	81.1301		84.7391	83.1301	115.87	63.7534	66.3767	69.2603		84.7391	106.884	177.623	244.856	134.884
85.0701	60	75.2397	64	63.7603	35.1404	38.7603	6.38014	30	96		85.0701	70.5205	90.2397	90.8596	120.901		85.0701	89.8596	137.24	72.2397	90.0993	71.3801		85.0701	89.3801	121.62	58.6199	119.86	76.3801		85.0701	124.24	82	127.86	88.339	81.1404		85.0701	78.1404	108.24	59.7603	63.3801	61.9007		85.0701	101.901	159	226.579	128.901
85.4011	55	72.2329	58.3836	63.3836	31.7671	37.7671	6	27.6164	96		85.4011	73.5342	87.2329	85.8493	106.918		85.4011	90.8493	136.233	70.2329	91.4658	68.3836		85.4011	90.3836	114.616	58.6164	117.849	70.3836		85.4011	122.233	80	123.233	86.3151	80.5342		85.4011	74.7671	101.233	57.1507	59.3836	56.5342		85.4011	96.9178	142	208.932	124.918
85.7321	50.613	70.226	53	62.774	28.774	36.774	5	25.613	95		85.7321	76.5479	84.226	80.839	92.9349		85.7321	91.4521	135.613	68.613	92.4521	65.387		85.7321	91.387	108.226	58	116.452	64.387		85.7321	120.839	77.613	119.613	83.9041	80.161		85.7321	70.774	94.613	55.774	56.387	52.5479		85.7321	91.3219	125.613	192.291	121.322
86.0631	46.6096	67.8288	48.3904	62.3904	25.7808	36.7808	4.39041	24	92.6096		86.0631	79.5616	83.2192	75.8288	79.9521		86.0631	91.0479	135	68.6096	91.8288	63.3904		86.0631	91.7808	103.219	58	115.438	59.3904		86.0631	119.829	74.6096	117.219	79.8767	80.1712		86.0631	67.7808	88.6096	55.7808	53.3904	49.1712		86.0631	86.9521	111	175.658	117.342
86.3941	42.6062	64.8185	44	62.3938	23.3938	36.3938	4	22.6062	89.6062		86.3941	82.5753	83.2123	71.8185	66.5753		86.3941	90.637	134	68.6062	89.8185	62.3938		86.3941	90.7877	98.8185	58.3938	113.425	56		86.3941	118.818	72.6062	115	75.2431	79.1815		86.3941	65.3938	82.6062	55.7877	50.3938	47.1815		86.3941	82.363	97.6062	161.031	113.363
86.7251	39.2055	62.411	40	62.3973	20.3973	35.7945	4	21	85.6027		86.7251	84.589	83.2055	67.8082	53.589		86.7251	89.0137	133.397	69.6027	87.2055	61.3973		86.7251	89.7945	94.8082	58.3973	111.411	53		86.7251	117.411	69.6027	113	69.8219	77.1918		86.7251	62.3973	77.6027	57.7945	48	44.7945		86.7251	78.9863	86.6027	147.411	107.384
87.0561	36.7979	59.7979	36.4007	62.4007	18.4007	35.8014	3	20	80.1986		87.0561	86.2021	84.1986	64.3973	43.2021		87.0561	86.9966	131	71.5993	82.5993	60.4007		87.0561	88.2021	91.7979	57.8014	108.997	50.4007		87.0561	115.997	67.5993	111.401	63.1952	75.2021		87.0561	60.4007	73	59.4007	46	43.2021		87.0561	75.4041	77	135.798	100.404
87.3872	34.1918	57.3836	33.4041	62.4041	16	35.4041	3	19	75.1918		87.3872	87.2123	86.1918	61.3836	33.2123		87.3872	84.5753	127.404	74	77.1918	60.4041		87.3872	85.2123	89.3836	56.8082	104.979	49.4041		87.3872	114.575	65.5959	109.404	56.5753	72.8082		87.3872	58.4041	69	61.4041	43.5959	41.2123		87.3872	72.0205	69.5959	125.788	92.4247
87.7182	32.7774	54.3699	30.4075	61.4075	14	35.4075	3	18	69.1849		87.7182	87.8151	87.1849	58.3699	25.8151		87.7182	81.5548	121.408	76.4075	71.5925	60		87.7182	82.2226	87.3699	55.8151	99.9623	47.8151		87.7182	112.147	64.5925	106.815	48.9623	69.8151		87.7182	56	65.5925	63.4075	41.5925	39.2226		87.7182	69.0377	63.5925	116.777	84.0377
88.0492	31.1781	52.3562	27.411	60.411	13	34.8219	2	17	63.1781		88.0492	87.2329	88.589	55.3562	19.411		88.0492	77.9452	114.411	79.411	65.589	60		88.0492	79.2329	86.3562	54.8219	93.3562	46.8219		88.0492	109.712	63.589	104.233	41.3562	65.8219		88.0492	54.589	63	65.411	39.589	37.2329		88.0492	65.0548	58.589	108.767	74.6438
88.3802	29.1712	50.3425	25.4144	57.4144	11.5856	34.4144	2	16	57.5856		88.3802	86.2431	89.5856	52.3425	14.4144		88.3802	73.9281	106.414	83.4144	59.5856	60		88.3802	75.6575	85.3425	53.8288	86.7569	45.8288		88.3802	106.099	63.1712	100.829	34.7569	61.4144		88.3802	53	61	66.4144	37	35.2431		88.3802	61.0719	54.5856	101.757	66.2431
88.7112	28.1644	49.3288	23.4178	54.4178	10.5822	33.4178	2	15	52.5822		88.7112	84.8356	89.5822	49.3288	10.4178		88.7112	69.7466	96.4178	86.4178	54	59.5822		88.7112	72.2534	84.7466	51.8356	79.7466	45.4178		88.7112	101.658	63.5822	97.2534	28.1644	57		88.7112	51.5822	59.4178	66.4178	35	32.8356		88.7112	57.089	52.5822	95.1644	58.2534
89.0422	26.1575	48.3151	21.4212	50.4212	9.57877	31.8425	2	14	48.1575		89.0422	82.8425	89.1575	46.7363	7.42123		89.0422	65.1575	86.4212	89.8425	49	59.5788		89.0422	69.2637	84.7363	49.2637	72.1575	44.4212		89.0422	96.6301	64.1575	92.2637	23.1575	52		89.0422	50.5788	59	65.4212	33	30.8425		89.0422	52.1062	50.5788	89.1575	50.8425
89.3732	24.1507	47.726	20.4247	45.8493	8.57534	30.4247	2	13	44.5753		89.3732	80.8493	87.1507	43.726	5.42466		89.3732	60.5753	75.4247	92.8493	45	58.5753		89.3732	66.274	85.1507	46.8493	64.5753	44.4247		89.3732	90.6027	65.1507	87.8493	18.1507	47		89.3732	50.1507	59.4247	63.4247	31.4247	28.4247		89.3732	46.6986	49.5753	84.1507	44.4247
89.7042	22.5719	48.1438	19.4281	40.8562	8.57192	28.4281	1	12.5719	41.5719		89.7042	77.8562	84.5719	40.7158	4.42808		89.7042	56.5719	65	94.8562	42	58.1438		89.7042	63.4281	85.5719	43.8562	57.5719	44.4281		89.7042	83.5753	66.7158	82.8562	14.5719	42		89.7042	49.7158	61.4281	61	30	25.8562		89.7042	41.7123	49.5719	78.5719	38.4281
90.0352	20.5685	49.137	19	35.4315	7.56849	26.4315	1	12	38.5685		90.0352	75.4315	80.5685	38.137	3.43151		90.0352	53	55	96.863	39	57.137		90.0352	60.863	87.5685	41.4315	52	44.4315		90.0352	75.9795	67.7055	78.2945	11	36.5685		90.0352	50.274	63.4315	58	28.4315	23.863		90.0352	36.2945	48.5685	73.5685	34.4315
90.3663	18.5651	50.5651	18.4349	29.8699	7.56507	24.4349	1	11	36.5651		90.3663	72.4349	76.1301	35.1301	3		90.3663	50	46	98.3048	37.4349	55.6952		90.3663	58.4349	89.4349	38.4349	46.4349	44.4349		90.3663	67.3904	68.6952	73.8699	8.56507	31.5651		90.3663	50.6952	65.4349	54.4349	27.4349	21.4349		90.3663	31.8699	47.5651	69.5651	31
90.6973	16.5616	52	18	24.8767	7	21.4384	1	10	34.5616		90.6973	68.8767	71.1233	32.5616	2.43836		90.6973	47.4384	38	99.3151	36.4384	54.2466		90.6973	56	92.4384	35.4384	41.4384	44.4384		90.6973	58.8082	69.2466	68.8767	7	27		90.6973	51.2466	67.8767	51	26.4384	20		90.6973	27.3151	47.1233	65	27
91.0283	15	54	17.4418	20.8836	6.55822	18.4418	1	10	33		91.0283	65.4418	65.1164	30	2		91.0283	45.4418	31.5582	99.7671	35.4418	52.2329		91.0283	54	94.8836	32.4418	37.8836	45.4418		91.0283	49.7911	68.2329	64.8836	5	22.5582		91.0283	52.2329	70.8836	48	25.4418	18.4418		91.0283	22.8836	45.5582	60	24.5582
91.3593	13	56	17	16.8904	6	16	1	9	31		91.3593	62.4452	59.1096	28.4452	2		91.3593	44.4452	26.5548	99.7808	35.4452	50.2192		91.3593	51	97.3356	30.4452	34.4452	46		91.3593	41.6644	66.774	60.4452	4	18.5548		91.3593	52.2192	72.8904	45	24.4452	17		91.3593	19.8904	44.1096	55.4452	22
91.6903	12	58.4486	16	13.4486	5.55137	13.4486	1	8	29		91.6903	59.4486	53.1027	27	2		91.6903	43.4486	22.1027	98.7945	34.4486	47.2055		91.6903	48	98.8973	28	31.4486	46		91.6903	33.6541	63.7569	56.4486	3	15.5514		91.6903	51.2055	74.4486	43	23.4486	16		91.6903	17.4486	41.1027	50.4486	19.5514
92.0213	10.4521	60.4521	15	10.4521	5	11	1	7.54795	26.5479		92.0213	56.4521	47.0959	25.9041	2		92.0213	42.9041	18.5479	97.2603	33.9041	44.6438		92.0213	45	99.3562	26	28.9041	46		92.0213	27.0959	59.7397	52.4521	3	13		92.0213	50.1918	75.4521	41	22.4521	14.5479		92.0213	15.4521	39.0959	45.4521	17.5479
92.3523	9	62.911	14	8.45548	5	9	1	7	24		92.3523	53	42.089	24.911	2		92.3523	41.911	16.5445	95.2774	32.911	42.1781		92.3523	41	97.911	24	26.4555	46		92.3523	21.089	55.7226	49	2	10.5445		92.3523	48.6336	75	39.4555	20.911	13.5445		92.3523	13.4555	36.089	40.4555	15.5445
92.6833	8	64.9178	13	6.4589	5	7	1.4589	6	21		92.6833	50	37.0822	24.9178	2		92.6833	40.9178	14.5411	92.2945	31.9178	39.1644		92.6833	37	94.9178	22	23.4589	45		92.6833	16.5411	50.1644	45	2	9		92.6833	45.6233	74.5411	38	19.4589	12.5411		92.6833	12.4589	32.6233	35.4589	13.5411
93.0144	7	66.387	12	5.46233	5	5.46233	1.46233	5.53767	18		93.0144	47	33.5377	23.9247	2		93.0144	38.9247	13.5377	88.3116	30.4623	36.1507		93.0144	33	89.9247	20.5377	21.4623	43.5377		93.0144	12.5377	44.6884	41	1	7.46233		93.0144	42.0753	73.5377	36.4623	17.9247	11.5377		93.0144	11.4623	29.613	30.4623	12
93.3454	6.46575	67.3973	11	4.46575	4	4	1.46575	5	15		93.3454	44	30.5342	23.9315	2		93.3454	36.9315	12.5342	84.3288	29.4658	33.6027		93.3454	28	83.9315	19	19.4658	41.5342		93.3454	9	39.137	38	1	6.46575		93.3454	38.5342	72.0685	34.4658	15.9315	11		93.3454	10.9315	26.0685	26.4658	10.5342
93.6764	6	68.8767	9	4	4	3	1.46918	4.53082	12.5308		93.6764	41	28.5308	23.4075	2		93.6764	34.9384	12.5308	79.3459	27.4692	30.5925		93.6764	24	76.4692	17.5308	17.4692	38.5308		93.6764	7	33.5925	34	1	6		93.6764	34.5308	70.5925	32.4692	13.4692	10		93.6764	10.4692	23.0616	22.4692	10
94.0074	5	69.8904	8	3.4726	4	3	1.4726	4	10		94.0074	38	27.5274	22.9452	2		94.0074	31.9452	12	73.363	25.4726	28.5822		94.0074	20	68.4726	15.5274	16	36.0548		94.0074	5	28.5822	31	1	5.4726		94.0074	31	69.1096	30.4726	11.4726	9		94.0074	9.94521	20.0548	18.4726	9
94.3384	4.47603	70.9041	7	3	4	2	1	3.52397	8		94.3384	35	26.524	21.9521	2.47603		94.3384	28.9521	11.524	67.3801	22.476	25.5719		94.3384	16	61	14	14.476	33.0479		94.3384	3	24.0479	28	1	5		94.3384	27	67.6199	28.476	9.47603	8		94.3384	9.47603	17.0479	15.476	8.47603
94.6694	4	71.9178	5.47945	2.47945	4	2	1	3.52055	6		94.6694	32	27	20.9589	3		94.6694	25.9589	11.5205	61.3973	20.4795	23.5616		94.6694	12.4795	53	12.5205	14	30.0411		94.6694	2	21.0411	25.5205	1	4.47945		94.6694	24	66.6027	26.9589	8.47945	7		94.6694	9	15.0411	13	8.47945
95.0004	4	71.9315	4	2.48288	3	1	1	3	4		95.0004	29	27	19.9658	3		95.0004	22.9658	11	54.9315	18	21.5514		95.0004	9.48288	46	11	13	27.0342		95.0004	2	18.0342	23	1	4.48288		95.0004	21	66.5856	25.4829	6.48288	6		95.0004	8.48288	13.0342	11	8.48288
95.3314	3	71.4315	3.4863	2	3	1	1	3	3		95.3314	26.4863	28	18.9726	3		95.3314	19.9726	11	48.9452	15.4863	19.0274		95.3314	7	40	9.5137	12	24.5137		95.3314	1	15.5137	21	1	4		95.3314	19	67.0822	24.4863	5	5.4863		95.3314	8	11.0274	9	8.4863
95.6625	3	70.9589	3	2	3	1	1	3	2		95.6625	24.4897	29.4897	17.4897	3		95.6625	17.4897	11	42.4692	13.4897	17.0205		95.6625	5	35	8	12	22.5103		95.6625	1	14.5103	19	1	4		95.6625	17	68.5514	23.9795	4	5		95.6625	7	9.51027	8	8.48973
95.9935	3	69.4658	2	2	2	1	1	3	1		95.9935	23	30.4932	16.4932	3		95.9935	15.4932	10	36.9863	11.4932	15.0137		95.9935	4	31.5068	6.50685	11.4932	21.0137		95.9935	0	13	17	1	4		95.9935	16	70.0411	22.9863	3	4		95.9935	6.49315	7.50685	7	8.49315
96.3245	3	66.4829	1.49658	2	2	1	1	3	1		96.3245	22	31.4966	15.4966	3.50342		96.3245	13.4966	9.49658	31.9932	10	13.0068		96.3245	2	28.5034	5.50342	11	19.5034		96.3245	0	12.5034	16	0	4		96.3245	15	72.0205	22.9932	2	3.49658		96.3245	6	6.50342	7	8.49658
96.6555	3	63.5	1	2	2	1	1	2.5	1		96.6555	21.5	32.5	14.5	4		96.6555	12	9	26.5	8.5	11		96.6555	2	26.5	4.5	11	18.5		96.6555	0	12	14	0	3.5		96.6555	15	74.5	23	2	3		96.6555	5	6	6	8
[truncated: 22 more columns]

## Sheet: Fig2G
CLV3 cell number quantification
Mock_day1	Dex_day1	Mock_day2	Dex_day2	Mock_day3	Dex_day3	Mock_day4	Dex_day4	Mock_day5	Dex_day5
138	130	118	135	116	172	107	172	98	190
129	134	103	131	126	161	130	130	119	204
139	139	137	136	112	135	114	140	125	220
122	134	118	136	94	132	116	197	84	155
148	129	117	173	75	158	116	148	120	156
125	142	111	161	111	150	96	139	117	196
137	126	114	128	140	158	102	159	102	168
121	121	128	171	103	160	117	214	106	266
118	136		151	105	152	97		90	202
118			135	105	135	103		96	150
143			115	108	149	111		104	149
			130			118			201

## Sheet: Fig2H
Ratio CLV3 / SAM cells: pCLV3:HEC1-linker-GR
Mock_day1	Dex_day1	Mock_day2	Dex_day2	Mock_day3	Dex_day3	Mock_day4	Dex_day4
0.0726698	0.0725446	0.0777843	0.0694802	0.070303	0.0827719	0.0684581	0.0814394
0.0770149	0.0694301	0.0615545	0.0669734	0.0744681	0.0754452	0.0776583	0.0656566
0.0821028	0.0743713	0.0623109	0.0777587	0.0797721	0.075167	0.0777096	0.0657277
0.0755418	0.0664004	0.0867638	0.0698152	0.0612777	0.0785247	0.0751782	0.103958
0.0883582	0.0677521	0.0720831	0.080728	0.0518314	0.0813594	0.0753736	0.0806979
0.0752559	0.0824144	0.0743329	0.0895439	0.0739015	0.0843645	0.08	0.0827381
0.085252	0.0759494	0.0752542	0.069452	0.0805524	0.0912767	0.0827922	0.0814132
0.0815914	0.072282	0.0774983	0.0906681	0.064375	0.0911681	0.0787879	0.112042
0.0883895	0.097561	0.0825806	0.0877397	0.0794852	0.076962	0.065852
0.0826331			0.0784428	0.0803366	0.0793651	0.0671447
0.0884901			0.0615961	0.0767591	0.0828238	0.0707908
			0.0794621			0.0840456

## Sheet: Fig2K
Mitotic index CZ quantification
MI_CZ_Mock_D1	MI_CZ_Dex_D1	MI_CZ_Mock_D2	MI_CZ_Dex_D2	MI_CZ_Mock_D3	MI_CZ_Dex_D3	MI_CZ_Mock_D4	MI_CZ_Dex_D4
0.263666	0.0671378	0.127208	0.0263158	0.0811966	0.0220264	0.128492	0.0159363
0.14717	0.0503356	0.0789474	0.047619	0.106383	0.0404984	0.0954545	0.0292887
0.0981818	0.0599251	0.170833	0.0538721	0.122807	0.0333333	0.0414938	0.0401606
0.123552	0.0621469	0.159011	0.0232558	0.0686275	0.0208333	0.107438	0.03125
0.121457	0.057508	0.11588	0.116364	0.109375	0.033195	0.0257235	0.0237154
0.163498	0.0944206	0.113122	0	0.121693	0.0260417	0.0786026	0
0.148438	0.04	0.100962	0.0608365	0.0761421	0.0364372	0.0658915	0
0.147766	0.101796		0.039604	0.121212	0.0423729	0.0543478	0.0224215
0.190736	0.0330033		0.0632411	0.105932	0.0334572	0.102222	0
0.123832	0.124183		0.0429185	0.0614754	0.0722892	0.0663717	0.0449438
0.112211	0.0564784		0.0130293	0.0503876	0.0983607		0.0670103
0.161677	0.0436242		0.015873		0.0452962		0.0371747
			0.0762332		0.0452489
			0.0570175
			0.0240964

## Sheet: Fig2L
Mitotic index PZ quantification
MI_PZ_Mock_D1	MI_PZ_Dex_D1	MI_PZ_Mock_D2	MI_PZ_Dex_D2	MI_PZ_Mock_D3	MI_PZ_Dex_D3	MI_PZ_Mock_D4	MI_PZ_Dex_D4
0.372365	0.367065	0.223794	0.312258	0.0939005	0.140625	0.159071	0.29039
0.323101	0.357792	0.239966	0.283907	0.129195	0.0992167	0.0756901	0.211354
0.320687	0.266619	0.319335	0.300923	0.096063	0.143798	0.0888099	0.247858
0.248748	0.28382	0.346354	0.227882	0.167917	0.123413	0.16321	0.25345
0.301146	0.294771	0.306002	0.181295	0.0857934	0.177522	0.118538	0.205016
0.347512	0.40094	0.28185	0.188112	0.247093	0.16019	0.194908	0.187135
0.327215	0.265042	0.196931	0.243723	0.129303	0.171565	0.107204	0.178478
0.252336	0.280137		0.257101	0.150315	0.163509	0.14914	0.247002
0.298859	0.242627		0.384875	0.0915556	0.329128	0.186519	0.17168
0.211615	0.4278		0.287951	0.114338	0.17013	0.160369	0.249526
0.267547	0.257448		0.274289	0.149356	0.193613		0.212261
0.232905	0.230053		0.248551		0.293954		0.235823
			0.169755		0.253228
			0.166913
			0.203115
