# Supplementary material for: Control of plant cell fate transitions by transcriptional and hormonal signals
Source: eLife journal article supplement (doi:10.7554/elife.30135), 2017-10-23
Supplement: supp [file elife-30135-supp-v1.zip › elife_poa_e30135_Figure_2_source_data_2.xlsx]

## Sheet: Fig2_sup2A
SAM size measurement pCLV3:HEC1-linker-GR
noT	Mock_Day1	Dex_Day1	Mock_Day2	Dex_Day2	Mock_Day3	Dex_Day3	Mock_Day4	Dex_Day4
71.8929	62.3859	86.9455	76.9717	86.9414	67.5091	93.3111	66.5919	85.796
62.1212	58.5758	82.0323	73.5051	87.196	76.2	77.4626	66.5657	98.6808
71.1737	77.5838	89.0141	77.3232	82.9939	67.4949	92.0566	79.3455	100.909
69.8404	68.9879	76.8646	76.6485	84.6929	79.0646	102.103	66.8929	103.655
72.9798	73.301	76.3152	75.604	72.3859	64.7475	97.1697	78.3778	93.6889
74.2364	66.6283	72.2283	73.6384	89.3556	69.9939	85.5434	80.8646	94.0606
75.0768	75.7172	81.0283	68.7273	88.198	76.0788	92.0909		96.5535
64.6	75.7899	73.2889			61.0202	95.0263		83.7273
					62.7798

## Sheet: Fig2_sup6B
SAM cell number quantification
Mock_day1	Dex_day1	Mock_day2	Dex_day2	Mock_day3	Dex_day3	Mock_day4	Dex_day4	Mock_day5	Dex_day5
1899	1792	1697	1943	1650	2078	1563	2112	1614	2019
1675	1930	1917	1956	1692	2134	1674	1980	1629	1863
1693	1869	1653	1749	1404	1796	1467	2130	1536	1987
1615	2003	1579	1948	1534	1681	1543	1895	1441	2005
1675	1904	1637	2143	1447	1942	1539	1834	1701	1841
1661	1723	1574	1798	1502	1778	1200	1680	1618	1821
1607	1659	1475	1843	1738	1731	1232	1953	1381	1646
1483	1674	1471	1886	1600	1755	1485	1910	1632	1832
1335	1394	1550	1721	1321	1975	1473	1942	1315	1657
1428			1721	1307	1701	1534		1433	1554
1616			1867	1407	1799	1568		1843	1741
			1636			1404			1866

## Sheet: Fig2_sup6C
Mitotic index quantification
MI_Mock_D1	MI_Dex_D1	MI_Mock_D2	MI_Dex_D2	MI_Mock_D3	MI_Dex_D3	MI_Mock_D4	MI_Dex_D4
0.351131	0.321772	0.205387	0.275591	0.0918919	0.124779	0.154854	0.249555
0.293367	0.3048	0.213724	0.245873	0.12483	0.0890448	0.0789278	0.185773
0.284091	0.233493	0.293565	0.262747	0.100134	0.128181	0.0804682	0.218573
0.226493	0.241676	0.309408	0.197714	0.151969	0.106096	0.15322	0.226073
0.270933	0.254476	0.274718	0.170571	0.0902985	0.158273	0.098395	0.180195
0.315441	0.353642	0.254572	0.163265	0.227682	0.142464	0.175439	0.161923
0.296885	0.229047	0.182476	0.218354	0.121758	0.152047	0.0997191	0.158508
0.231608	0.246934		0.229206	0.145913	0.146297	0.134959	0.213026
0.275268	0.207242		0.337947	0.0940485	0.291109	0.172018	0.152642
0.189318	0.375839		0.254407	0.104755	0.152778	0.144165	0.228847
0.240528	0.219876		0.23022	0.131413	0.177544		0.193462
0.219768	0.199223		0.212623		0.252607		0.204665
			0.156489		0.224768
			0.151075
			0.178212
