# Supplementary material for: Control of plant cell fate transitions by transcriptional and hormonal signals
Source: eLife journal article supplement (doi:10.7554/elife.30135), 2017-10-23
Supplement: supp [file elife-30135-supp-v1.zip › elife_poa_e30135_Figure_3_source_data_1.xlsx]

## Sheet: Fig3C
Quantification primordia number
pCUC2:HEC1-linker-GR
Mock_day1	Dex_day1	Mock_day2	Dex_day2	Mock_day3	Dex_day3	Mock_day4	Dex_day4
4	4	5	3	4	1	4	0
4	4	4	3	4	1	4	1
4	5	4	2	4	2	3	1
4	3	4	3	4	1	4	0
5	4	4	3	3	0	4	0
4	4	4	2	4	2	4	0
	Mock_1	Mock_2	Mock_3	Mock_4
Average	4.16667	4.16667	3.83333	3.83333
SD	0.408248	0.408248	0.408248	0.408248
	Dex_1	Dex_2	Dex_3	Dex_4
Average	4	2.66667	1.16667	0.333333
SD	0.632456	0.516398	0.752773	0.516398
