# Supplementary material for: Control of plant cell fate transitions by transcriptional and hormonal signals
Source: eLife journal article supplement (doi:10.7554/elife.30135), 2017-10-23
Supplement: supp [file elife-30135-supp-v1.zip › elife_poa_e30135_Figure_4_source_data_1.xlsx]

## Sheet: Fig4E
Quantification auxin maxima pDR5v2:3xYFP-NLS
Col-0			hec1,2,3
WT_DR5v2_#1	5		hec123_DR5_#1	6
WT_DR5v2_#2	6		hec123_DR5_#2	6
WT_DR5v2_#3	5		hec123_DR5_#3	5
WT_DR5v2_#4	5		hec123_DR5_#4	6
WT_DR5v2_#5	5		hec123_DR5_#5	5
WT_DR5v2_#6	5		hec123_DR5_#6	6
WT_DR5v2_#7	5		hec123_DR5_#7	5
WT_DR5v2_#8	5		hec123_DR5_#8	5
WT_DR5v2_#9	6		hec123_DR5_#10	5
WT_DR5v2_#10	5		hec123_DR5_#11	5
WT_DR5v2_#11	6		hec123_DR5_#12	7
WT_DR5v2_#12	5		hec123_DR5_#13	5
WT_DR5v2_#13	5		hec123_DR5_#14	7
WT_DR5v2_#14	6		hec123_DR5_#15	6
WT_DR5v2_#15	5		hec123_DR5_#16	6
WT_DR5v2_#16	6		hec123_DR5_#17	6
WT_DR5v2_#17	5		hec123_DR5_#18	6
WT_DR5v2_#18	5
WT_DR5v2_#19	5
WT_DR5v2_#20	5
Average	5.25			5.70588
SD	0.444262			0.685994
