# Supplementary material for: Control of plant cell fate transitions by transcriptional and hormonal signals
Source: eLife journal article supplement (doi:10.7554/elife.30135), 2017-10-23
Supplement: supp [file elife-30135-supp-v1.zip › elife_poa_e30135_Figure_5_source_data_1.xlsx]

## Sheet: Fig5C
Intensity plot profiles pTCSn:erGFP
Distance	Col-0_TCS_#23	22	21	20	19	18	17	16	15	14	13	12	11	10	9	8		Average_WT	SD		Average_hec1,2,3	SD
0	221	194.5	160	159	173	327	260	377.5	189.5	295.5	182.5	225.5	195.5	202	192.5	243		224.875	62.1465		252.929	124.666
0.3211	226.471	195.019	160.51	160.471	173.529	340.529	262.057	380	193.529	299.981	182	223.452	193	203.057	199	244.51		227.32	64.0616		252.815	123.533
0.6422	231.962	194.038	159.519	161.962	174.557	345.596	262.596	377.519	198.557	302.962	182.481	224.924	191.481	204.595	203.481	245.443		228.855	64.1873		251.712	121.121
0.9634	235.471	193.057	158.529	162.943	174.586	344.172	262.586	372.057	203.586	304.943	184	228.357	192.471	209.643	205.471	244.828		229.794	62.9413		249.878	116.436
1.2845	236	191.076	157.076	162.924	175.076	338.691	265.076	367.076	207.615	308.385	186.538	233.847	196.462	216.691	204.924	245.618		230.817	61.6073		248.209	109.477
1.6056	236.548	190.095	156.548	161.905	176.095	333.191	270.096	363.096	209.095	310.809	190.095	237.357	204	223.287	203.357	250.427		232.25	60.5114		247.223	101.452
1.9267	237.557	191.557	157	161.328	176.557	329.115	276.115	359.672	209.557	312.213	194.115	238.443	214.672	228.344	202.885	260.197		234.333	59.6218		247.232	93.6391
2.2478	240.567	195	158.567	161.866	177.567	329	282.267	356.701	209.567	311.599	197.134	240	225.834	230.834	203.866	272.93		237.081	59.1126		248.648	87.434
2.569	245.153	200.271	161	163.424	178.576	329.847	286.882	354.729	210.576	308.965	200	242.729	234.459	231.306	206.424	288.624		240.185	58.7326		251.189	83.6072
2.8901	251.172	206.07	163.586	167	179.586	332	292.516	356.172	213	304.898	203.414	247.758	239.516	231.758	209	307.28		244.045	59.13		254.015	81.491
3.2112	256.787	211.427	166.595	172.595	181.595	334.191	298.978	363.191	216.405	300.831	206.405	254.191	241.978	233.191	212.595	331.303		248.891	60.7877		256.453	80.6007
3.5323	261.815	214.369	168.21	178.605	184	337.42	306.42	375.21	221.395	297.369	209	261	243.025	237.21	215.605	363.057		254.607	64.6822		258.248	79.8124
3.8534	266.459	215.312	169.229	183.229	186	341.303	312.844	392.229	226.771	296.927	210	269	244.459	243	218.385	401.56		261.044	71.1187		260.142	78.9666
4.1746	269.873	215.879	168.873	187.248	186.624	345.994	316.873	414.248	231.376	300.503	211	277	247.873	250.376	222.376	442.026		268.009	79.3134		262.749	77.9695
4.4957	273.267	216.831	167.535	190.268	185.634	350.704	317.535	444	236	307.465	210	283.634	253.268	258.099	227.732	476.353		274.895	88.1712		266.439	77.3447
4.8168	278.643	220.07	164.93	192	184	357.147	314.217	481.07	239.643	317.427	210	285.287	260	266.14	233.713	497.987		281.392	96.4453		270.495	77.2619
5.1379	285.347	224.694	162.959	193	183.694	365.223	307.917	522.041	242.306	328.389	210.347	282.959	266.694	274.777	239.694	507.331		287.336	103.771		274.234	77.1601
5.459	292.675	230.338	160.325	192.338	184.675	374.299	300.974	556.675	244.325	339.35	211	279.325	273.013	283.701	245.338	505.752		292.131	109.25		277.086	77.2657
5.7802	299.984	237.328	159	190.656	184.984	383.704	298.36	579.328	245.344	348.312	212.328	278.672	275.312	291.624	250	499.904		295.928	112.654		279.655	77.7033
6.1013	304.955	245	159.319	190.274	185.955	391.771	302.726	587	245.681	353.955	216	280	273.592	298.866	255	492.414		298.907	113.058		282.723	78.7267
6.4224	306.927	250	162.618	191.545	185.927	399.838	311.382	585.309	246	355.618	220.691	283.618	267.545	304.089	259	485.56		300.979	111.783		286.35	79.9103
6.7435	308.898	254	168.599	195.095	185.599	407.605	321.701	580.898	246.299	355	225.102	288.599	259.497	304.994	262.299	478.688		302.68	109.866		290.865	81.3921
7.0646	309.869	256	173.29	201.319	185.58	415.682	329.42	575.159	246.58	353.71	228.841	292.29	252.449	302.188	264	471.217		303.6	107.83		295.735	83.6684
7.3858	312.841	255.56	176	207.681	185.56	423.758	332.159	566.401	247.841	354.44	233.319	294.28	250.841	299.803	263.28	462.764		304.158	105.388		301.035	87.2601
7.7069	319.541	253.812	176.459	213.083	185.541	431.376	330.917	550.354	249.812	358.188	239.564	294.729	253.541	300.166	261.271	455.06		304.588	102.07		306.568	92.6226
8.028	329.045	253.045	174.478	216.522	187.261	438.217	330.955	527.045	252.045	365.217	245.65	296	259.261	305.567	257.522	450.611		305.527	98.4232		312.379	98.2013
8.3491	342.258	253.006	171.748	217.503	191	443.748	333.994	501.503	255.755	375.497	249.736	300.252	263.503	312.258	252.755	450.761		307.205	95.69		317.877	102.819
8.6702	355.936	254.484	169	216.726	194.758	444.758	340.516	477.726	259.726	390.516	251.822	310.242	263.484	319.968	246.484	457.968		309.632	94.8197		322.456	105.518
8.9914	367.325	258	168.232	215.697	198.768	444.535	349.535	459.697	263.465	407.767	251.373	324.233	259.697	326.697	240.465	469.465		312.81	95.825		325.802	106.098
9.3125	377.229	262.777	168.446	214.115	202.554	443.554	355.554	445.892	264.669	424	251.44	339	252.669	334.446	235.669	481.446		315.841	97.8036		328.262	105.153
9.6336	386.134	269.787	171.427	215.067	205.787	443.787	357.573	436.067	266.853	437.213	253.506	353	246.64	343.427	236.427	489.427		319.508	98.9685		330.914	103.429
9.9547	395.631	278.389	175.408	217.223	208.796	445.796	357.389	431.019	272.815	445.204	257.369	363.796	242.612	354.408	240.408	488.408		323.417	98.7458		333.696	102.234
10.2758	406.777	286.834	181	223.971	211	449	356.417	430.971	285.777	449.583	262.446	370.806	239.583	366	247	478.583		327.859	97.0444		336.877	101.14
10.597	418	295.522	185.185	234.739	212.815	456.185	356.261	435.554	304.739	454.554	266.522	377.446	238.369	376.631	253.631	466.554		333.294	95.8379		340.005	99.8185
10.9181	428.65	303.424	190.175	247.525	213.825	469.35	356.124	440.175	327.526	463.526	269.949	384.474	239.35	382.124	258.474	456.526		339.45	95.7658		343.255	98.7979
11.2392	437.834	309.51	193.166	259.497	215.503	486.662	354.006	442.669	346.166	477.331	272.172	392.503	244.166	383.51	259.503	450.497		345.293	97.2495		347.189	97.5825
11.5603	447.312	314.064	195.312	268.468	217.532	500.78	351.752	442.22	356.156	492.312	273.22	402.376	251.312	380.44	259.688	448.312		350.078	99.1777		352.198	96.4386
11.8814	457.586	318.707	196.293	272.586	221.56	506.879	352.828	440.535	358.147	505.293	274.267	410.414	260.44	379.389	260	452.293		354.201	100.737		358.206	94.8351
12.2026	468.822	324.863	197.137	272.685	226.315	502.822	359.631	440.22	355.274	514.137	276.178	415.589	270.411	381.767	262.137	465.137		358.32	101.624		365.661	93.0483
12.5237	481.637	332	197.255	270.764	230.363	493.764	371.726	442.834	354.382	516.382	279.236	416.618	279.51	389.853	265.382	490.873		363.286	103.027		373.964	91.837
12.8448	495.353	338.882	198.118	268.825	232.529	486.589	386.704	443.879	358.471	513.707	285.175	413.764	287.589	400.057	270.471	527.882		369.25	105.548		382.53	92.0371
13.1659	509	345.675	199.108	268.758	234.567	488.217	399.809	441.159	367.541	511.083	291.459	408.783	295.65	410.242	275.433	572.892		376.211	110.108		390.697	94.1856
13.487	520.704	351.605	199.197	269.691	235.803	501.704	408.013	435.618	381.494	515.185	296.803	404.605	300.691	419.21	280.296	615.099		383.482	116.503		398.817	97.9776
13.8082	525.822	355.733	200.268	274.357	237	526.197	411.287	429.197	397.446	532.803	301.089	399.643	302.624	425.287	284	645.535		390.518	122.963		407.15	103.132
14.1293	526	359.841	200.239	282.159	238.159	560.806	408.522	428.443	414.239	563.08	305.318	398.682	302.478	429.363	287.841	659.115		397.768	129.097		416.25	109.597
14.4504	523.35	365	201.21	295.93	240.28	601.739	401.72	435.51	429.07	596.229	310.35	402.86	300.28	434.44	292.65	662.541		405.822	134.833		426.552	117.435
14.7715	522.605	371.06	203.181	317.637	243.303	641.85	393.94	450.516	438.879	620.729	318.303	413	299.121	438.516	297.576	663.876		414.631	139.632		438.05	126.109
15.0926	528.713	377.102	206.102	347.541	246.255	674.185	390	470.49	445.694	630.624	329.204	427.102	299.949	440.541	303.541	672.885		424.371	143.357		449.99	133.971
15.4138	544.662	384.041	210	385.586	250.124	696.503	391.917	490.503	448.586	629.924	341.083	441.124	301.917	437.669	310.627	689.573		434.615	146.109		461.756	140.29
15.7349	571.478	393	211.968	426.682	253.032	712.745	396.904	504.618	450.618	629.299	348.968	453.032	306.936	434.809	322.682	710.146		445.432	149.546		472.516	143.962
16.056	606.245	406.978	213.955	459.889	257	725.866	404.889	511.733	454.688	636.666	349.933	461	312.978	438.866	337.733	727.691		456.632	153.664		481.168	145.738
16.3771	642.051	428	215.962	479	261.987	740.924	413.936	510.86	459.822	655.885	344.936	463.987	321	451.924	355.822	740.306		467.9	158.4		487.455	146.256
16.6982	668.99	455.01	217.99	483.016	267	757.971	422.984	509.962	464.959	684.984	337.981	464.994	330.01	471.981	372.949	746.057		478.552	163.136		492.225	146.441
17.0194	684.051	488.955	222.006	475.911	272.974	773.083	432.013	510.064	471.076	719.025	335.057	463.006	342.968	494.051	387.108	747.892		488.703	166.719		497.123	147.39
17.3405	688.175	526.809	227.984	468.761	277.936	782.223	441.016	513.111	477.143	755	339.127	464.032	357.904	512.096	397.255	747.777		498.522	169.053		503.314	149.593
17.6616	689.28	569.592	235.949	464.618	282.873	781.306	451.924	517.102	484.153	785.025	348.229	470.127	375.847	525.051	403.357	749.669		508.381	169.811		511.306	152.381
17.9827	695.21	612.334	244.895	464.51	284.86	775.315	463.79	523	493.07	803.21	361.28	482.245	397.825	535.895	410.42	755.439		518.956	169.663		520.674	154.832
18.3038	707.955	653.019	253.911	467.376	282.955	770.268	475.554	529.866	501.911	806.58	375.312	498.267	418.866	546.688	422.446	767.108		529.88	169.57		531.289	156.88
18.625	724.621	688.701	263.946	477.08	278.054	774.162	487.296	538.729	507.729	797.083	387.325	512.217	437	559.459	440.487	782.809		541.044	170.026		542.772	158.292
18.9461	744.236	720.408	274.064	494.726	273.127	788.064	498.045	548.554	509.618	783.592	395.318	523.127	448.255	572.236	461.701	806.408		552.592	172.65		554.088	159.395
19.2672	764.121	750.169	288.147	521.169	269.22	808	507.901	559.487	510.634	775.831	399.22	533.146	456.513	584.048	486.099	834.169		565.492	176.831		564.992	159.861
19.5883	783.255	776.93	306.248	553.764	268.248	827	519.841	571.503	514.586	779.987	399.248	544.248	463.58	594.841	514.656	863.764		580.106	181.549		574.396	160.08
19.9094	798.631	799.783	327.462	590.414	270.185	839.277	533.076	586.815	523.631	802.939	399.277	556.646	469.739	606.615	550.217	888.322		596.439	185.477		583.437	161.162
20.2306	806	817.452	350.51	628.35	276.204	847.917	550.287	602.306	537.694	844.834	403.408	569.325	478.713	625.064	592.854	902.943		614.616	187.744		594.018	164.562
20.5517	805.446	828.99	368.669	661.882	287.111	862.672	568.777	616.669	557.443	899.895	414.446	579.895	490.669	655.213	636.455	910.656		634.056	189.912		606.573	170.611
20.8728	802.726	834.854	378.968	688.669	302.121	886.662	585.242	629.605	581.153	954.936	432.363	585.299	507.363	701.885	669.994	915.854		653.606	192.747		621.265	177.869
21.1939	802.914	836.997	382.175	704.478	319.869	921.656	597.653	641.261	606.694	993.828	453.131	587.481	528.869	762.385	688.048	923.389		671.927	196.164		636.187	185.205
21.515	810.261	839.478	381.121	707.28	335.86	966.204	606.701	656.439	628.038	1006.68	470	590.242	552.019	831.713	691.924	937.318		688.205	200.831		649.436	190.921
21.8362	826.646	842.354	379.048	699.898	348	1022.19	613.449	672.952	637.904	998.197	478	595.946	571.653	897.468	689.443	962.401		702.222	208.565		660.277	193.977
22.1573	849.229	847.885	378.637	689.637	356.159	1092.5	620.159	689.567	635.089	978.637	479	606.592	585.567	948.924	686.866	1001.64		715.381	220.324		669.182	194.684
22.4784	875.376	857.325	381.338	682.662	361.169	1173.36	626.831	703.481	623.65	961	475.169	619.182	594.156	979.729	688.194	1057.19		728.739	236.163		678.08	193.796
22.7995	904.994	870.822	389	679.395	364	1253.71	630.465	712.93	610.108	955.108	471.178	629.892	601	990.58	697.783	1124.57		742.846	254.088		688.619	192.805
23.1206	934.576	889.812	401.812	679.182	365.624	1316.25	632.873	718.812	600.248	962.497	467.188	636.939	608.315	986.054	720.503	1198.7		757.461	270.849		701.323	193.289
23.4418	960.49	914.605	419.408	679.051	367.21	1348.42	636.42	721.185	598.013	981.815	463.197	643.987	619.172	974.42	755.777	1273.94		772.319	283.84		715.351	196.102
23.7629	980.108	944.965	435.586	681.239	369.758	1349.17	649.137	724.691	605.965	1009.59	461.793	652.863	630.691	967.793	795.277	1347.76		787.899	292.989		729.559	201.437
24.084	989.879	977.484	446.567	686.153	373.701	1330.08	673.834	732.331	622.134	1041.08	463.917	667.382	641.382	975.783	826.248	1421.46		804.339	300.179		744.371	208.232
24.4051	991.14	1007.42	449.548	693.99	377.869	1306.75	710.834	749.653	641	1071.94	471.965	684.713	653.357	999.096	838.07	1497.13		821.529	307.721		759.758	215.859
24.7262	990.834	1032.29	446.764	703.694	383.293	1295.25	754.287	779.656	660.943	1103.48	485.936	703.592	667	1035.35	832.478	1574.59		840.59	317.592		775.681	223.556
25.0474	997.885	1050.25	443.51	715.398	389	1304.28	800.643	817.169	681.207	1135.64	504.076	721.717	687.283	1073.79	816.659	1654.34		862.053	330.276		791.244	230.439
25.3685	1016.84	1066.25	443.49	724.866	396	1334.99	846.573	857.274	701.057	1170.37	523.669	737.255	716.178	1108.22	801.586	1731.36		885.999	344.859		805.636	235.405
25.6896	1049.7	1084.74	448.471	730.656	404.736	1383.48	891.691	893.621	718.494	1204.34	542.299	749.678	752.92	1137.68	793.701	1797.22		911.464	359.322		820.116	238.841
26.0107	1092.74	1112.36	458	733.248	412.904	1440.6	933.592	921.427	731.752	1230.75	560.261	758.261	792.236	1161.9	793.191	1849.04		936.392	372.455		835.861	241.759
26.3318	1141.85	1145.17	473	734.465	418.299	1494.35	967.93	942.513	740.369	1244.54	578.299	765.032	825.946	1183.87	798.283	1888.36		958.892	383.294		853.637	244.442
26.653	1188.12	1177.36	492.293	738.07	420.656	1531.1	991.089	962.229	749.497	1250.93	598.414	774.605	845.694	1208.95	806.949	1920.55		978.532	391.153		871.46	246.719
26.9741	1222.88	1202.49	512.605	746.487	420.882	1540.28	1000.34	986.873	763.076	1259.21	620.605	791.462	853.596	1248.07	820.067	1946.88		995.988	395.169		887.131	247.719
27.2952	1243.88	1222.75	534.312	758.376	421.44	1523.89	994.318	1017.58	784.051	1273.62	646.624	813.943	856.14	1310.07	840.694	1965.56		1012.95	395.534		898.606	247.307
27.6163	1261.46	1245.75	556	772.678	424.357	1495.71	977.427	1047.67	810.65	1293.29	675.678	839.462	863.777	1400.28	865.532	1972.54		1031.39	394.731		906.376	245.231
27.9374	1293.36	1281.36	580.669	792.338	427.662	1476.06	960.331	1071.02	843.268	1314.97	704.344	861.35	883.089	1515.05	891.363	1969.97		1054.14	396.663		912.637	242.688
28.2586	1356.93	1335.5	607.659	827.978	434.704	1490.57	953.067	1088.75	879.245	1340.2	730.592	879.955	919.621	1644.84	912.274	1966.39		1085.52	404.801		919.803	239.873
28.5797	1453.9	1404.49	631.65	890.299	445.803	1562.05	963.306	1107.81	918.962	1372.17	753.446	900.949	972.631	1774.1	927.65	1975.3		1128.41	421.239		929.879	237.974
28.9008	1567	1477.96	646	986.08	462.239	1698.12	989.997	1136.75	959.035	1416.27	774.682	926.92	1038.09	1880.2	939.879	2005.96		1181.57	444.683		942.891	238.283
29.2219	1666.22	1544.16	647	1102.43	481.694	1883.5	1026.82	1181.47	993.146	1474.36	795.567	957.522	1106.55	1944.22	951.541	2064.39		1238.79	472.754		957.309	241.864
29.543	1727.65	1601.5	637	1208.72	500.79	2080.47	1066.02	1239.46	1014.78	1548.93	814.831	988.347	1168.44	1964.68	967.58	2152.74		1292.62	503.304		972.41	248.152
29.8642	1744.39	1656.19	625.777	1275.21	516.497	2245.88	1099.76	1305.26	1019.38	1639.85	828.726	1017.5	1219.64	1958.77	996.936	2262.01		1338.24	532.838		989.677	257.303
30.1853	1729.21	1704.13	619.99	1291.13	526.583	2356.74	1124.73	1370.34	1013.14	1745.36	837.427	1044.02	1258.92	1952.36	1045.55	2373.85		1374.59	558.382		1011.09	270.919
30.5064	1699.89	1728.73	625.854	1271.86	532.261	2414.9	1141.45	1426.48	1003.82	1860.96	844.478	1066.92	1290.62	1969.52	1112.75	2463.11		1403.35	577.471		1036.97	289.391
30.8275	1663.74	1716.39	644.503	1241.68	533.338	2442.77	1152.93	1470.5	1000.6	1979.9	853.49	1082.83	1319.73	2027.25	1183.17	2512.92		1426.61	591.001		1063.31	309.633
31.1486	1622.16	1674.62	670.134	1214.39	532.987	2472.91	1172.23	1503.17	1006.83	2100.52	866.465	1087.88	1348.77	2129.75	1239.72	2526.11		1448.04	604.247		1083.71	323.978
31.4698	1578	1633.89	695.309	1194.29	534.618	2527.69	1210.71	1526.02	1017.36	2223.27	880.401	1087.46	1374.78	2264.11	1269.46	2515.6		1470.81	622.796		1094.05	326.958
31.7909	1539.12	1628.11	714.892	1179.03	542.675	2603.63	1269.73	1544.2	1026.68	2348.44	890.299	1089.64	1392.73	2400.14	1272.64	2492.13		1495.88	646.444		1094.19	319.699
32.112	1520.19	1674.64	727.366	1171.92	559.277	2672.86	1337.86	1563.54	1031.82	2467.88	896.07	1105.25	1398.78	2499.85	1260.35	2464.28		1522	667.953		1089.29	308.789
32.4331	1530.07	1771.97	733.86	1178.39	581.79	2702.67	1391.57	1590.89	1034.32	2564.8	903.306	1142.33	1397.08	2534.96	1246.96	2441.75		1546.67	678.589		1084.88	300.926
32.7542	1570.98	1901.12	735.898	1204.25	607.322	2685.76	1417.95	1632.78	1042.85	2620.23	918.984	1198.22	1395.65	2506.02	1238.68	2445.09		1570.11	676.406		1085.02	299.46
33.0754	1637.06	2032.84	732	1244.32	632.873	2645.65	1421.98	1691.16	1062.9	2626.44	944.223	1263.92	1403.12	2440.8	1237.61	2494.76		1594.48	668.31		1090.13	303.418
33.3965	1724.29	2143.99	722.532	1292.67	659.443	2612.87	1425.61	1764.06	1094.47	2597.36	977.545	1326.91	1424.2	2377.48	1245.57	2604.04		1624.57	664.1		1098.43	310.464
33.7176	1826.86	2233.48	714.968	1336.9	686.025	2600.06	1447.67	1842.48	1135.01	2562.29	1016.5	1380.29	1458.41	2339.59	1264.45	2763.1		1663.01	669.459		1105.78	317.154
34.0387	1929.18	2323.39	715.822	1364.08	707.076	2596.64	1494.48	1909.03	1180.03	2554.02	1061.15	1423.67	1505.72	2336.69	1298.75	2943.5		1708.95	684.676		1109.12	320.711
34.3598	2008.61	2451.78	734.643	1368.15	719.089	2587.48	1558.4	1943.83	1229.48	2593.61	1113.54	1459.62	1563.64	2368.04	1354.03	3109.78		1760.23	705.568		1107.15	321.454
34.681	2048.21	2640.21	771.427	1357.26	723.532	2571.55	1632.34	1936.02	1291.81	2691.7	1173.49	1488.62	1628.21	2436.23	1430.49	3240.1		1816.32	730.55		1102.45	322.21
35.0021	2055.82	2881.83	820.796	1348.13	724.459	2565.63	1710.38	1894.82	1375.59	2845.9	1233.78	1512.22	1692.75	2543.48	1517.04	3337.32		1878.75	763.534		1098.33	324.781
35.3232	2057.38	3139.75	873.389	1354.88	729	2586.98	1791.45	1843	1481.84	3039.91	1286.67	1534.35	1748.94	2688.34	1599.14	3420.07		1948.44	806.766		1095.56	326.678
35.6443	2077.13	3367.85	918.318	1376.52	741.439	2637.83	1874.08	1802.54	1597.03	3241.03	1332.36	1559.34	1793.11	2860.62	1667.2	3501.9		2021.77	855.031		1094.37	324.87
35.9654	2117.88	3526.98	949.561	1402.71	760.43	2706.57	1951.13	1784.25	1702.88	3404.12	1379.16	1590.19	1825.2	3037.1	1720.58	3583.71		2090.15	896.883		1094.3	320.575
36.2866	2168.63	3603	962.433	1428.8	784.261	2774.22	2010.13	1792.58	1783.31	3491.93	1433.61	1624.57	1846.12	3188.97	1763.94	3658.18		2144.67	922.451		1096.63	317.876
36.6077	2218.17	3609.04	961.318	1460.25	808.287	2831.07	2043.39	1820.27	1831.75	3488.7	1490.02	1665.05	1857.88	3297.39	1796.7	3721.94		2181.33	929.243		1101.39	320.79
36.9288	2262.96	3576.25	953.962	1507.58	832.815	2880.99	2053.61	1853.06	1843.01	3404.31	1531.65	1718.19	1865.69	3370.14	1817.21	3777.92		2203.08	922.99		1107.93	329.308
37.2499	2301.12	3528.76	951.248	1575.34	858.876	2931.04	2054.24	1870.64	1818.57	3278.82	1544.36	1793.73	1879.6	3431.46	1829.39	3829.67		2217.3	912.87		1113.75	339.892
37.571	2336.24	3478.49	959.064	1652.03	887.732	2989.85	2057.85	1865.57	1765.85	3171.25	1530.88	1893.83	1907.81	3498.6	1840.41	3876.18		2231.98	906.965		1116.78	347.843
37.8922	2378	3439.39	975.293	1723.25	919.726	3063.63	2070.42	1852.04	1702.39	3140.46	1511.24	2007.45	1958.04	3565.62	1853.94	3912.08		2254.56	908.777		1116.54	349.06
38.2133	2435.1	3432.16	998.369	1778.27	954.089	3157.73	2087.2	1860.31	1648.1	3216.88	1508.64	2122.29	2033.76	3613.21	1861.84	3928.47		2289.78	917.001		1114.6	345.06
38.5344	2506.16	3469.73	1025.29	1818.24	993.586	3280.53	2098.35	1914.82	1617.88	3379.67	1534.82	2226.98	2132.41	3619.03	1852.63	3921.94		2337	928.209		1113.76	342.351
38.8555	2580.83	3534.04	1055.69	1855.34	1047.25	3433.57	2094.92	2016.89	1618.97	3569.57	1580.84	2311.06	2245.87	3581.83	1825.81	3896.13		2390.54	938.246		1115.23	346.56
39.1766	2640.26	3594.7	1083.34	1898.64	1116.99	3602.37	2073.09	2138.07	1659.67	3722.69	1629.31	2362.99	2360.79	3516.29	1795.34	3862.03		2441.04	943.541		1117.42	356.441
39.4978	2665.94	3629.34	1101.97	1947.03	1193.75	3763.04	2035.64	2244.1	1745	3802.45	1664.58	2373.97	2461.68	3455.55	1782.04	3834.97		2481.32	942.785		1117.72	366.51
39.8189	2645.82	3635.19	1109.32	1991.66	1257.22	3892.83	1986.8	2314.9	1868.68	3811.72	1686.6	2349.1	2537.95	3431.79	1792.39	3818.92		2508.18	937.972		1115.42	372.265
40.14	2585.02	3619.9	1110	2018.18	1289.8	3977.5	1931.6	2353.1	2004.08	3776.84	1704.22	2306.89	2584.82	3463.14	1815.73	3808.62		2521.84	933.547		1111.64	373.191
40.4611	2500.41	3592.7	1115.3	2030.19	1288.48	4016.67	1875.88	2374.31	2103.93	3730.62	1722.89	2268.92	2605.89	3540.85	1828.18	3788.69		2523.99	932.078		1108.52	371.492
40.7822	2417.27	3559.33	1132.57	2041.39	1264.83	4020.29	1825.35	2388.2	2128.27	3690.9	1739.41	2255.45	2611.24	3631.44	1816.19	3749.35		2516.97	931.839		1107.32	369.241
41.1034	2358.45	3531.64	1160.39	2069.64	1238.52	4002.89	1787.02	2398.63	2072.46	3662.97	1744.68	2278.03	2612.56	3700.66	1784.75	3683.47		2505.42	929.293		1108.14	366.437
41.4245	2343.14	3525.22	1195.87	2120.37	1222.51	3978.13	1771.28	2404.11	1978.78	3645.15	1735.45	2336.82	2622.46	3730.2	1755.9	3591.68		2497.32	921.793		1110.31	362.973
41.7456	2390.39	3550.81	1236.81	2187.03	1228.23	3959.94	1784.87	2402.91	1908.2	3639.81	1716.78	2428.39	2653.14	3721.13	1754.45	3479.58		2502.65	908.381		1112.92	360.622
42.0667	2511.71	3598.28	1281.49	2263.02	1260.57	3960.26	1822.81	2393.4	1897.83	3653.26	1693.32	2538.1	2703.85	3693.8	1797.99	3361.81		2526.97	891.486		1115.1	362.57
42.3878	2700.36	3637.77	1326.43	2344.67	1319.06	3981.04	1870.3	2375.85	1948.15	3685.18	1662.34	2643.16	2765.71	3671.62	1890.85	3260.92		2567.71	875.119		1116.27	370.57
42.709	2919.71	3638.95	1360.15	2439.27	1396.93	4015.54	1907.31	2350.08	2031.93	3728.96	1627.47	2718.19	2827.57	3677.89	2024.27	3196.81		2616.31	863.796		1115.89	382.79
43.0301	3118.25	3598.54	1371.32	2550.15	1484.82	4049	1920.23	2314.73	2117.55	3775.29	1599.82	2744.09	2885.9	3718.47	2178.65	3183.92		2663.17	859.731		1113.08	395.171
43.3512	3253.36	3537.08	1358.05	2672.2	1570.02	4072.21	1903.17	2262.21	2183.59	3821.27	1593.97	2723.19	2946.41	3785.09	2324.91	3226.58		2702.08	864.051		1106.46	404.235
43.6723	3316.19	3489.54	1328	2785.2	1645.77	4084.2	1864.38	2184.81	2219.4	3867.58	1615.76	2673.36	3013.71	3858.33	2427.77	3311.21		2730.33	876.638		1096.88	408.659
43.9935	3330.12	3487.23	1293.34	2859.81	1701.78	4085.57	1817.22	2090.48	2231.82	3915.36	1661.73	2616.13	3089.53	3924.08	2463.21	3406.78		2748.39	895.829		1087.2	409.951
44.3146	3329.93	3543.94	1262	2873.82	1730.83	4078.91	1776.73	2001.46	2234.99	3960.47	1720.2	2569.09	3169.96	3974.75	2432.74	3479.62		2758.71	917.978		1082.31	410.353
44.6357	3340.93	3646.52	1231.58	2830.19	1732.36	4065.86	1760.25	1947.01	2242.71	3996.7	1785.26	2540.5	3240.76	4010.99	2372.12	3519.15		2766.43	938.214		1084.57	413.023
44.9568	3370.52	3760.84	1200.09	2754.53	1709.26	4045.65	1773.89	1938.74	2255.5	4020.89	1855.15	2529.52	3284.25	4036.02	2331.04	3533.18		2774.94	952.51		1092.93	419.738
45.2779	3409.62	3849.3	1171.06	2676.9	1668.79	4022	1810.78	1973.46	2266.5	4033.24	1930.41	2526.13	3277.4	4049.48	2348.91	3534.3		2784.27	957.094		1101.59	430.617
45.599	3439.39	3889.83	1155.29	2620.06	1621.27	4000.43	1849.72	2038.53	2267.3	4033.86	2006.13	2512.29	3208.21	4053.14	2430.97	3515.9		2790.14	950.46		1105.45	443.785
45.9202	3436.71	3878.31	1158.34	2587.86	1573.45	3993.93	1871.34	2121.96	2259.08	4022.87	2073.79	2474.8	3084.34	4049.8	2551.24	3468.91		2787.92	935.636		1102.51	455.958
46.2413	3380.53	3823.31	1180.12	2579.38	1533.41	4005.01	1873.09	2209.18	2247.99	3995.12	2122.52	2411.88	2935.83	4046.37	2666.54	3388.66		2774.93	916.158		1094.46	464.277
46.5624	3268.59	3740.09	1213.2	2590.74	1504.92	4030.08	1875.91	2276.73	2232.26	3956.57	2140.39	2335.54	2798.78	4045.03	2740.71	3286.53		2752.25	896.207		1083.05	467.067
46.8835	3126.21	3651.11	1245.95	2624.66	1489.11	4055.47	1908.62	2307.37	2202.95	3922.37	2124.95	2266.68	2702.32	4044.89	2759.95	3180.66		2725.83	878.734		1069.74	463.427
47.2047	2998.82	3577.42	1273.04	2681.89	1483.13	4073.71	1989.12	2297.66	2153.34	3907.1	2083.14	2229.9	2659.38	4039.66	2731.2	3094.76		2704.58	865.68		1053.48	453.946
47.5258	2930.41	3531.77	1295.31	2746.27	1485.56	4081.91	2110.88	2266.05	2088.98	3909.75	2033.14	2239.91	2672.23	4027.85	2667.38	3051.33		2696.17	857.189		1034.55	440.232
47.8469	2942.37	3514.29	1314.54	2787.62	1491.86	4079.15	2252.58	2236.24	2026.37	3907.29	2000.31	2286.62	2728.39	4011.63	2579.69	3071.15		2701.88	851.314		1013.65	426.067
48.168	3023.34	3513.48	1336.33	2782.92	1496.39	4065.53	2383.75	2219.53	1981.27	3877.75	1997.87	2337.06	2802.53	3996.99	2480.13	3165.97		2716.3	846.927		993.01	415.344
48.4891	3146.58	3522.47	1356.97	2731.36	1491.28	4042.86	2485.64	2214.83	1953.89	3819.01	2015.46	2362.51	2861.77	3990.57	2384.25	3323.05		2731.41	847.798		974.798	408.709
48.8102	3281.72	3535.68	1370.52	2654.03	1470.99	4012.1	2552.78	2218.05	1939.48	3755.77	2026.81	2360.23	2894.95	3996.95	2305.32	3513.92		2743.08	858.786		959.975	405.33
49.1314	3409.45	3546.6	1370.17	2578.13	1438.94	3979.03	2590.59	2226	1932.18	3719.21	2018.73	2351.43	2912.96	4011.27	2245.97	3696.38		2751.69	879.436		948.066	402.563
49.4525	3513.75	3545.72	1350.19	2525.22	1407.19	3947.72	2603.84	2233.8	1929.06	3728.38	1997.46	2356.94	2935.91	4026.51	2202.71	3838.94		2758.96	903.77		938.985	398.437
49.7736	3580.94	3533.11	1314.55	2504.1	1387.8	3922.15	2598.6	2238.64	1936.86	3779.41	1985.19	2374.43	2974.98	4036.77	2170.25	3929.58		2766.71	924.301		932.252	391.533
50.0947	3594.32	3526.59	1272.22	2504.71	1393.46	3897.79	2579.2	2243.66	1963.48	3852.55	1989.03	2386.72	3033.08	4038.97	2152.64	3977.76		2775.39	936.089		928.434	381.562
50.4159	3551	3557	1241	2510	1427	3867	2557	2254	2014	3925	1999	2383	3099	4033	2156	3997		2785.62	937.559		929.143	372.442
50.737	3461.96	3639.74	1233.54	2507.71	1488.32	3831.71	2535.06	2265.07	2076.56	3981.85	1999.33	2370.38	3153.78	4020.59	2179.78	4001.48		2796.68	931.402		935.262	369.97
51.0581	3352.44	3757.56	1254.94	2508.41	1568.42	3805.82	2506.7	2268.31	2135.35	4021.89	1978.8	2366.05	3172.71	4003.06	2211.49	3999.59		2806.97	922.309		945.564	378.615
51.3792	3255.15	3875.48	1297.15	2531.6	1654.46	3806.72	2458.6	2254.47	2172.51	4047.03	1934.32	2369.81	3142.11	3982.65	2240.86	3999.56		2813.91	915.855		956.488	396.317
51.7003	3197.53	3963.31	1346.15	2591.5	1732.61	3837.06	2380.28	2223.39	2179.08	4063.15	1869.8	2369.48	3068.76	3960.55	2260.76	4005.64		2815.57	915.905		964.395	415.358
52.0215	3190.1	4007	1390.91	2679.05	1793	3881.53	2281.32	2189.97	2158.86	4074.19	1793.15	2355.91	2975.05	3934.76	2278.05	4016.13		2812.44	921.844		968.075	428.776
52.3426	3221.83	4013.34	1422.46	2765.9	1828.61	3905.32	2191.93	2167.27	2121.78	4080.23	1716.41	2333.92	2888.34	3905.14	2304.94	4027.16		2805.91	929.311		969.543	434.956
52.6637	3265.33	3997.46	1447	2824.48	1838.14	3873.47	2146.38	2163.35	2081.41	4082.27	1650.68	2312.41	2833.33	3871.26	2345.8	4035.59		2798.02	930.684		971.519	436.311
52.9848	3289.55	3974.48	1476.62	2839.34	1825.45	3767.32	2152.2	2174.12	2046.75	4077.46	1605.9	2290.61	2819.18	3832.01	2390.01	4041.48		2787.66	921.078		977.753	437.168
53.3059	3279.19	3955.7	1520.4	2811.71	1797.58	3596.44	2195.18	2186.3	2023.58	4062.03	1584.35	2260.52	2843.4	3790.11	2421.94	4046.62		2773.44	902.467		988.579	441.187
53.6271	3241.1	3947.94	1573.43	2748.69	1767.1	3393.55	2249.11	2190.58	2010.2	4034.2	1581.92	2217.62	2889.39	3747.08	2427.57	4052.71		2754.51	881.788		1004.33	450.245
53.9482	3187.05	3946.9	1614.42	2659.25	1736.37	3200.85	2293.81	2183	2003.79	3997.1	1590.73	2175.16	2934.71	3699.85	2405.58	4057.42		2730.37	865.112		1025.74	465.277
54.2693	3130.85	3947.2	1626.75	2558.83	1701.11	3050.56	2325.19	2167.36	2004.72	3958.31	1605.39	2152.54	2964.39	3653.53	2354.69	4055.69		2703.57	854.731		1053.12	487.215
54.5904	3074.32	3937.94	1606.33	2464.8	1654.88	2959.88	2347.21	2151.16	2016.24	3924.32	1620.34	2161.25	2979.52	3618.85	2278.11	4036.99		2677.01	848.978		1085.23	513.82
54.9115	3012.43	3914.03	1564.97	2390.38	1596.13	2928.34	2367.89	2136.98	2046.41	3900.1	1631.41	2192.07	2989.66	3604.55	2187.01	3995.47		2653.61	845.772		1118.92	540.799
55.2327	2939.61	3866.81	1521.48	2338.06	1532.14	2953.87	2391.53	2127.69	2094.58	3885.74	1632.15	2227.72	2999.78	3610.38	2101.16	3934.29		2634.81	842.948		1148.41	560.852
55.5538	2858.29	3791.13	1489.65	2300.55	1470.47	3029.06	2418.99	2125.89	2150.24	3878.74	1624.68	2247.45	3006.6	3622.22	2039.56	3868.06		2620.1	839.22		1169.87	570.198
55.8749	2772.19	3682.29	1469.14	2261.9	1416.54	3148.95	2447.74	2128.48	2203.1	3876.81	1611.16	2239.74	2996.6	3633.43	2015.56	3808.9		2607.03	835.242		1181.4	570.204
56.196	2684.15	3539.83	1453.61	2210.04	1372.76	3300.52	2473.26	2132.36	2252.12	3876.42	1596.14	2204.16	2960.17	3644.41	2029.69	3759.13		2593.05	832.325		1184.81	565.978
56.5171	2601.05	3368.77	1442.06	2141.51	1343.01	3461.82	2490.83	2132.01	2302.47	3873.46	1585.37	2148.53	2903.1	3661.26	2070.62	3711.63		2577.34	831.271		1183.09	558.899
56.8383	2531.55	3185.72	1439.99	2067.83	1329.89	3591.76	2500.65	2125.41	2358.17	3863.8	1582.9	2088.69	2844.08	3691.94	2120.27	3662.87		2561.59	830.59		1180.51	551.005
57.1594	2482.06	3023.12	1453.03	2005.06	1336.38	3646.01	2498.79	2110.58	2411.18	3851.79	1590.99	2038.41	2799.38	3736.83	2161.24	3622.41		2547.95	827.279		1181.52	544.802
57.4805	2450.97	2912.24	1482.73	1967.66	1359.22	3595.52	2482.69	2090.54	2447	3842.84	1607.69	2005.42	2767.28	3790.67	2181.4	3610.52		2537.15	818.814		1189.14	544.006
57.8016	2422.09	2865.16	1521.24	1960.69	1392.63	3455.89	2445.66	2069.13	2460.39	3837.74	1623.46	1997.95	2734.06	3841.81	2180.5	3640.86		2528.08	807.241		1202.42	549.622
58.1227	2376.94	2866.52	1554.96	1975.06	1425.33	3281.69	2382.13	2052.31	2455.96	3827.5	1631	2018.91	2681.28	3877.21	2162.43	3701.98		2516.95	797.2		1218.54	559.531
58.4439	2309.45	2880.46	1575.79	1990.85	1444.52	3134.51	2292.17	2040.36	2439.82	3801.78	1626.15	2060.62	2597.4	3887.57	2135.35	3756.15		2498.31	790.196		1232.81	568.93
58.765	2229.73	2882.52	1579.54	1985.77	1434.99	3053.2	2186.45	2031.25	2413.5	3757.75	1612.73	2096.34	2491.43	3866.54	2108.12	3757.49		2467.96	783.79		1240.93	573.816
59.0861	2159.42	2872.07	1563.84	1945.45	1391.87	3037.61	2082.77	2023.54	2378.36	3702.58	1595.64	2096.46	2393.3	3808.42	2090.61	3682.81		2426.55	774.674		1240.37	572.505
59.4072	2118.37	2869.43	1533.06	1874.34	1323.08	3067.61	1999.03	2014.39	2335.58	3648.96	1577.55	2051.39	2331.04	3715.43	2087.99	3541.48		2380.54	763.059		1230.31	563.943
59.7283	2105.1	2895.22	1496	1789.32	1247.1	3118.77	1937.48	2003.06	2289.01	3609.04	1553.99	1981.48	2308.06	3600.36	2094.56	3375.26		2337.74	754.382		1212.09	548.678
60.0495	2102.78	2955.77	1467.44	1711.15	1184.88	3175.16	1895.45	1991.06	2239.57	3596.67	1517.88	1913.76	2308.66	3489.69	2101.77	3229.59		2305.08	754.615		1187.81	530.646
60.3706	2095.64	3037.68	1457.81	1654.48	1148.11	3226.92	1869	1983.4	2185.55	3607.45	1466.48	1869.32	2307.26	3404.85	2100.4	3128.89		2283.95	762.9		1161.2	512.466
60.6917	2084.1	3117.62	1469.56	1624	1142.03	3269.75	1864.56	1983.87	2126.34	3616.38	1405.54	1853.24	2290.73	3346.78	2090.09	3070.19		2272.17	770.972		1135.76	494.85
61.0128	2082.46	3168.97	1493.83	1615	1158.62	3302.27	1887.83	1985.52	2066.51	3581.92	1350.19	1858.75	2260.08	3295.32	2078.15	3033.07		2263.66	768.117		1114.8	478.913
61.3339	2102.94	3178.85	1521.45	1619.27	1187.15	3320.38	1936.77	1970.4	2012.87	3479.26	1313.29	1873.92	2229.06	3238.35	2076.43	2994.43		2253.43	748.876		1100.59	467.461
61.6551	2140.94	3151	1545.03	1627.02	1214.69	3321.93	1990.03	1924.98	1969.33	3321.91	1300.71	1886.02	2210.09	3183.98	2094.64	2939.62		2238.87	718.144		1093.52	461.517
61.9762	2176.15	3106.69	1557.25	1635.97	1231.94	3317.58	2018.07	1845.09	1937.06	3146.67	1304.07	1886.15	2208.99	3144.93	2130.34	2866.84		2219.61	688.086		1091.63	457.948
62.2973	2185.63	3068.28	1551.78	1650.79	1233.25	3333.38	2003.61	1739.81	1915.63	2990.83	1311.08	1868.03	2225.06	3112.96	2170.98	2783.42		2196.53	669.69		1093.36	453.73
62.6184	2156.01	3040.48	1521.26	1673.7	1216.98	3390.39	1952.88	1625.11	1903.11	2872.96	1310.71	1830.31	2254.21	3060.06	2195.57	2696.69		2168.78	666.496		1097.21	449.663
62.9395	2094.29	3011.56	1460.96	1698	1182.41	3487.49	1893.75	1518.59	1898.41	2796.53	1300.55	1773.17	2294.11	2962.4	2186.61	2606.55		2135.34	675.568		1103.2	447.905
63.2607	2018.21	2963.84	1376.82	1710.25	1136.38	3599.42	1853.73	1433.18	1898.76	2756.18	1283.55	1698.54	2343.18	2823.67	2140.75	2511.39		2096.74	691.005		1111.11	448.291
63.5818	1953.9	2882.14	1282.57	1698.15	1087.75	3689.59	1848.45	1375.02	1895.48	2738.6	1267.05	1616.02	2397.13	2674.61	2070.71	2414.34		2055.72	705.573		1120.43	447.813
63.9029	1918.54	2759.3	1196.4	1662.46	1045.23	3725.34	1873.84	1344.93	1880.83	2735.8	1255.41	1535.35	2440.51	2551.11	1999.11	2324.08		2015.52	711.86		1129.22	443.635
64.224	1912.69	2598.06	1129.41	1613.9	1012.75	3688.21	1915.22	1341.4	1851.32	2745.98	1252.88	1466.5	2459.24	2472.85	1942.89	2250.02		1978.33	704.846		1134.85	434.077
64.5451	1924.29	2415.78	1086.26	1564.55	988.682	3583.33	1947.46	1359.82	1816.97	2768.87	1255.52	1413.01	2447.87	2434.42	1908.36	2189.83		1944.06	685.691		1135.33	419.551
64.8663	1940.4	2236.5	1064.58	1516.47	969.85	3431.99	1944.16	1390.95	1788.78	2793.2	1256.01	1375.84	2419.02	2410.18	1888.78	2138.44		1910.32	659.177		1131.53	401.69
65.1874	1951.8	2078.42	1060.96	1470.55	950.726	3264.71	1897.91	1419.21	1778.1	2803.82	1246.96	1352.92	2387.08	2373.02	1873.22	2092.56		1875.12	630.559		1125.53	382.192
65.5085	1951.25	1947.43	1066.94	1424.33	929.917	3117.72	1819.47	1431.96	1787.86	2796.68	1225.49	1337.1	2359.59	2311.55	1848.94	2057.2		1838.34	606.085		1118.01	362.439
65.8296	1934.13	1839.2	1070.04	1384.92	906.828	3021.76	1738.18	1423.17	1814.46	2778.17	1196.04	1320.46	2331.5	2231.85	1813.03	2040.62		1802.77	591.023		1108.88	344.021
66.1507	1907.75	1744.79	1061.28	1356.51	886.105	2995.49	1678.34	1393.13	1846.94	2759.36	1162.21	1296.94	2292.49	2147.28	1768.4	2046.47		1771.47	588.563		1098.08	329.069
66.4719	1886.09	1664.09	1035.52	1345.76	869.834	3025.71	1648.32	1350.18	1876.49	2743.9	1126.39	1267.91	2244.12	2068.23	1724.82	2069.91		1746.7	596.963		1086.67	318.238
66.793	1874.33	1599.56	996.127	1351.57	856.102	3071	1643.39	1306.13	1895	2733.52	1089.54	1241.44	2197.31	1999.24	1695.48	2097.92		1727.98	609.88		1076.29	312.114
67.1141	1857.67	1553.03	949.554	1364.39	841.006	3076.95	1649.89	1272.54	1900.14	2723.85	1048.04	1225.47	2165.96	1946.29	1689.29	2117.98		1711.38	618.085		1069.47	311.736
67.4352	1809.04	1516.87	902.366	1377.2	822.025	3009.51	1654.61	1253.43	1885.76	2712.79	1003.35	1226.08	2158.56	1913.43	1706.88	2123.06		1692.18	615.197		1067.48	318.086
67.7563	1711.24	1484.46	859.197	1385.99	798.127	2874.45	1649.87	1245.29	1851.13	2695.06	957.522	1243.25	2170.06	1901.11	1745.96	2119.22		1668.25	602.778		1070.41	330.297
68.0775	1575.69	1455.83	824.118	1393.82	770.255	2713	1634.56	1238.12	1802.27	2671.56	913.71	1269.88	2185.9	1909.26	1798.23	2119.41		1642.23	589.569		1076.14	345.5
68.3986	1431.57	1436.11	799.58	1404.66	740.21	2573.61	1613.76	1228.3	1752.54	2644.96	875.414	1295.35	2190.44	1938.24	1855.94	2121.49		1618.88	582.373		1080.6	359.855
68.7197	1308.67	1428.5	783.099	1416.06	707.455	2486.09	1590.98	1219.93	1709.09	2625.08	848.207	1307.72	2172.3	1984.86	1907.77	2103.81		1599.98	581.909		1080.77	369.971
69.0408	1224.48	1431.08	769.121	1419.06	673.121	2451.34	1565.11	1220.15	1668.45	2619.19	832.484	1300.55	2131.61	2035.39	1936.25	2040.68		1582.38	584.162		1074.98	375.89
69.3619	1180.73	1437.07	751.309	1405.55	640.799	2456.05	1530.23	1233.16	1621.18	2625.86	825.344	1274.13	2073.45	2064.76	1921.44	1935.04		1561.01	585.564		1063.77	379.316
69.6831	1166.12	1439.5	727.72	1375.36	612.548	2479.41	1484.06	1249.69	1563.85	2626.1	821.815	1236.87	1999.92	2048.69	1849.88	1817.07		1531.16	582.899		1048.28	382.301
70.0042	1162.75	1435.6	700.662	1336.82	588.424	2497.42	1429.85	1255.75	1500.5	2593.96	817.092	1195.25	1909.94	1975.26	1723.16	1722.95		1490.34	572.816		1029.54	385.407
70.3253	1157.08	1427.23	673.516	1297.81	567.892	2487.11	1373.48	1238.07	1436.29	2515.57	809.669	1155.11	1808.71	1858.08	1562.15	1667.68		1439.72	553.955		1009.28	389.271
70.6464	1144.18	1417.55	649.621	1266.03	551.777	2441.05	1317.8	1197.65	1371.03	2402.15	795.796	1117.03	1707.93	1728.52	1401.8	1647.68		1384.85	529.682		989.167	393.981
70.9675	1123.05	1408.05	629.669	1242.5	539.662	2371.79	1261.83	1145.57	1304.5	2280.47	773.834	1078.39	1621.49	1625.65	1271.89	1649.76		1333.01	506.635		970.884	397.415
71.2887	1098.55	1395.76	611.242	1226.97	528.548	2301.11	1210.11	1098.74	1234.76	2170.58	744.968	1037.94	1554.34	1568.57	1187.31	1660.68		1289.38	489.362		954.405	397.038
71.6098	1073.69	1381.04	590.739	1215.94	517.694	2244.03	1169.04	1068.33	1162.43	2079.92	715.306	993.197	1501.76	1554.36	1146.17	1659.71		1254.59	478.231		939.44	391.644
71.9309	1051.52	1363.32	570.72	1207.96	505.519	2200.52	1143.76	1055.32	1089.84	2007.37	691.761	945.761	1456.92	1562.75	1135.68	1622.32		1225.69	469.658		926.257	382.768
72.252	1030.1	1343.1	553.701	1205.69	491.051	2163.45	1134.55	1055.04	1024.41	1947.23	678.548	898.599	1414.76	1566.56	1138.85	1532.25		1198.62	459.691		916.269	373.575
72.5731	1004.04	1321.25	542.659	1207.53	473.682	2126.57	1136.98	1060.44	970.541	1897.94	671.637	855.659	1373.54	1546.52	1139.07	1392.21		1170.02	447.865		910.248	367.435
72.8943	970.312	1299.68	537.006	1207.71	455.331	2089.37	1145.66	1062.71	931.936	1858.08	662	814.331	1332.93	1495.96	1124.65	1228.38		1138.5	436.957		907.788	365.638
73.2154	929.825	1279.64	536.392	1193.57	437.643	2052.89	1157.61	1053.11	905.971	1825.96	644.643	777	1290.9	1423.75	1098.25	1072.5		1104.98	428.784		907.053	366.882
73.5365	884.93	1263.56	537.439	1156.82	424.312	2019.01	1172.25	1025.25	887.363	1801.63	619.248	745.752	1242.86	1355.8	1068.56	949.439		1072.14	423.937		905.939	368.579
73.8576	839.656	1252.21	538.79	1099.53	414.605	1985.88	1186.39	979.236	868.564	1779.18	592.908	722.277	1188.19	1308.77	1047.61	865.697		1041.84	420.482		902.844	368.036
74.1787	798.446	1244.71	539.414	1028.21	409.586	1947.29	1192.78	921.86	844.981	1747.54	572.293	705.898	1128.38	1284.08	1036.54	813.707		1013.48	415.15		896.46	363.911
74.4999	762.952	1236.02	538.283	954.064	404.85	1894.55	1184.61	864.236	816.268	1689.17	560	691.465	1067.09	1263.07	1028.03	785.583		983.765	403.97		886.657	355.57
74.821	737.93	1220.44	536.274	885.248	400.369	1825.74	1159.97	814.299	787.178	1595.8	555	675.166	1005.66	1232.76	1013.97	776.261		951.379	384.483		874.085	343.776
75.1421	724.701	1195.24	532.264	829.092	396.115	1746.11	1120.24	776.08	763.092	1474.33	552.529	655.885	949.115	1192.46	994.599	782.828		917.793	358.359		860.42	330.857
75.4632	722.293	1163.39	526.51	788.981	394.803	1669.25	1075.2	748.096	747.414	1343.08	550.274	635.49	900.019	1150.92	972.102	802.943		886.923	330.681		847.201	318.108
75.7843	724.226	1130.38	519.245	766	394.188	1605.28	1033.02	725.659	738.85	1222.66	543.471	615.736	860	1115.07	950.908	830.038		860.921	307.373		835.007	306.145
76.1055	724.236	1102.46	510.764	753.236	393.299	1556.7	995.764	707.006	735.051	1127.93	530.65	599.178	825.293	1083.19	930.459	857.293		839.532	290.839		823.214	294.921
76.4266	721.096	1087.18	500.548	745.452	388.94	1522.48	963.548	684.392	732.704	1054.25	513.583	585.904	794.643	1048.59	906.443	876.131		820.368	280.685		811.171	284.433
76.7477	717.051	1083.61	492.134	740.433	380.032	1499.59	930.134	656.599	727.752	989.618	496.083	574.65	770.618	1007.71	881.019	885.166		802.012	274.593		798.645	274.892
77.0688	714.516	1087.41	485.758	739.414	369.312	1485.79	891.551	622.656	717.93	922.379	480.828	564.379	754.895	960.933	859.102	882.105		783.685	270.921		785.345	267.879
77.3899	713.433	1085.15	480.815	742	359.554	1477.29	848.618	586.79	703.21	852.395	469.197	550.223	749.051	913.987	846.618	867.146		765.342	268.523		771.175	263.779
77.7111	711.933	1067.91	476.873	747.624	352.946	1469.05	807.248	556.564	685	789.188	460	528.182	748.866	873.121	844.624	839.449		747.411	266.279		757.311	262.806
78.0322	703.93	1035.55	471.108	754.465	348.745	1456.04	776.535	535.535	665.357	738.287	450.822	499.968	749.076	840.79	847	805.777		729.937	263.478		744.372	264.803
78.3533	688.662	999.067	464.325	762.494	345.376	1432.92	762.519	524.013	646	702.65	441.662	469.962	744.793	815.793	844.831	775.258		713.771	259.285		732.155	266.676
78.6744	666	966.631	455.682	769.522	339.866	1399.9	759.389	521.115	626.522	680.248	433.363	444.452	730.93	798.611	833.841	752.166		698.64	253.684		719.847	264.923
78.9955	642.85	942.761	448.85	771.85	332.096	1358.66	755.844	521.197	604.252	669.054	424.952	426.755	710.803	785.102	815.15	735.436		684.101	246.709		706.611	256.537
79.3167	625.439	926.376	443.14	766.14	322.541	1312.22	743.223	523.261	580.159	663.318	415.739	414.178	688.439	771.561	789.701	724.325		669.36	238.694		692.584	241.5
79.6378	615.478	912.083	438.261	750.392	313.175	1263.61	720.395	525.045	557.217	655.825	404.694	405.433	668	752.436	758.306	715.57		653.495	229.58		679.002	223.326
79.9589	612.637	896.854	434.242	727.363	305.968	1213.1	692.268	522.089	537.516	643.153	394.669	399.669	653.242	723.694	719.057	708.873		636.524	219.056		666.899	206.473
80.28	613.777	878.659	430	700.446	302.003	1163.77	663.787	512.892	521.777	621.554	385.662	394.997	645.334	686.449	676.452	698.344		618.494	208.046		656.404	194.075
80.6011	616	858.471	424	673.306	300.019	1118.78	639.038	495.611	506.102	594.898	380.573	391.185	640.51	646.121	635.446	680.057		600.007	197.818		647.131	189.189
80.9223	615.369	837.892	416.723	650	299.016	1081.54	618.293	471.369	486.277	567.092	377.707	387.446	638.739	610.739	602.032	652.863		582.068	189.763		638.081	192.712
81.2434	611.911	815.089	405.669	633.586	296.994	1054.75	602.662	445.331	461.414	542.248	378.924	384.586	639.911	582.497	581.408	619.484		566.029	184.358		629.002	202.857
81.5645	605.392	794.121	391.634	625.268	293.806	1036.78	592.293	422.293	434.513	524.293	383.121	383.634	643.952	559.366	572.879	582.124		552.842	181.468		619.271	214.97
81.8856	593.656	777.108	377.618	620.108	289.637	1023.81	584.127	405.255	412.446	510.255	387.363	384.618	644.083	536.382	570.573	545.592		541.414	179.837		608.194	225.336
82.2067	577.624	767.134	365.621	613.025	283.541	1012.73	576.108	391.217	398.379	498.271	389.621	387.621	637.083	510.433	570.325	512.975		530.732	178.818		596.345	232.245
82.5279	558.338	760.242	355.733	598.108	278.401	1002.69	565.134	380.089	390.312	488.267	384.866	390.643	619.936	483.312	569.178	484.535		519.361	177.588		585.176	235.983
82.849	535.981	753.334	349.755	576.334	275.28	993.615	548.175	371.93	387.21	479.245	373.965	392.685	595.701	454.28	566.07	464.175		507.358	175.753		574.869	236.77
83.1701	512.611	743.49	343.847	554.592	274.178	984.694	526.178	366.847	385.127	474.153	358	390.771	573.433	427.153	560.949	449		495.314	173.93		565.863	235.362
83.4912	489.287	733.634	336.952	538.809	276.08	974.825	502.111	363.857	383.048	469.08	340.016	384.873	557.207	404.064	551.904	434.984		483.796	172.358		557.244	232.699
83.8123	465.089	724.847	329	529.949	280.019	957.955	477.038	361.943	380	463.019	325	374.962	548.057	389.013	537.949	422.987		472.927	169.689		548.873	229.028
84.1335	442.997	718.067	318.99	520.99	285.01	928.029	454.997	356.013	374.013	453	311.99	366.01	542.987	382.997	522.035	410		461.758	164.985		539.558	224.014
84.4546	423	710.268	308.949	508.911	292.038	889.038	434.051	347.013	368.051	442.038	300.949	358.026	538.936	382.974	509.166	399		450.775	158.398		528.655	217.695
84.7757	407.978	697.401	298.955	490.822	300.045	846	416.156	335.978	361.089	435.067	290.889	349.067	535.822	385.911	503.312	389.022		440.22	150.784		515.755	210.692
85.0968	397.873	676.414	292	467.777	309	807.904	400.287	326.904	353.127	433.064	281.777	339.159	532.713	386.873	506.414	381.064		430.772	143.286		501.232	203.896
85.4179	391.752	648.29	290	445.876	317.917	775.752	388.455	321.834	345.248	434	276.627	327.29	532.545	387.793	513.497	376.083		423.31	135.948		486.013	197.174
85.7391	388.541	618	290	432	325.949	749.592	380.51	318.745	339.357	436.847	272.541	316.459	533.439	385.847	519.51	374		417.584	129.547		471.847	189.008
86.0602	384.455	589.697	290.94	424.121	333.06	730.395	375.545	316.697	333.484	436.576	270.455	308.545	534.395	383.94	522.484	370.94		412.858	124.448		459.163	179.023
86.3813	381.51	564.51	291.72	420.14	338.42	715.299	371.49	311.65	326.56	430.369	267.44	302.631	535.299	379.07	523.42	366.86		407.899	120.777		448.424	169.086
86.7024	379.761	542.443	288.602	414.08	341.955	703.443	365.478	304.761	319.398	419.124	263.522	299.717	535.124	373.239	524.239	361.682		402.285	118.422		438.948	160.787
87.0235	380.911	524.554	284.376	403	344.427	693.643	358.357	296.911	312.267	404.108	258.643	298.803	535.752	366.357	526.911	357.465		396.655	117.236		429.543	154.61
87.3447	382.901	512.605	277.21	388.901	343.974	682.901	350.197	289	306.099	390.111	251.803	297.086	539.717	360.296	527.605	355.21		390.976	117.104		419.515	149.392
87.6658	385.892	504.892	271.026	373.108	341.166	673	343	281.217	301.108	381.134	245.783	295.191	549.917	354.325	525.35	355.026		386.321	117.789		408.36	143.583
87.9869	387.882	502	267.94	360.236	335.239	665	338.882	274.353	297.353	376.293	239.882	293.178	566.411	349.236	519.175	354.94		383	119.314		396.171	137.172
88.308	388.745	503	269.726	350.382	325.293	662.618	335.873	269.255	296.637	376.363	235.873	292.147	586.873	344.255	509.236	351.981		381.141	121.741		384.333	129.674
88.6291	386.863	504.137	274.631	345.548	313.191	661.315	332.863	266.137	298.822	380.452	234	293.096	606.274	338.137	500.315	346.041		380.114	123.982		373.149	122.207
88.9503	382.707	506.147	280.828	343.44	301.197	656.975	329	264.707	302.879	384.56	234.853	295.026	623.439	331.147	492.267	337.121		379.143	125.498		362.949	115.979
89.2714	378.532	507.312	286.064	341.312	291.029	647.439	324.312	264.532	306.624	385.844	234.844	296.936	636.156	323.312	488.22	327.22		377.481	126.232		354.258	111.311
89.5925	376.006	508.166	290.338	335.331	286.656	633.682	320.497	264.503	308.331	381.331	235.669	296.662	642	317.497	487.841	318.503		375.188	125.68		346.576	107.702
89.9136	375.599	508.175	291.65	326.175	285.226	615.847	318.701	263.65	307	373.526	236.65	293.526	639	314.701	486.424	311.65		371.719	123.476		339.61	105.051
90.2347	376.153	507.369	289.815	313.185	286.739	595.121	316.924	262.815	302.815	362.739	237.631	289.185	628.631	314.108	481.338	305.815		366.899	119.855		332.919	102.727
90.5559	375.863	505	284	300.194	287.389	571.726	315.777	260.194	296	351.777	238.612	283	614.417	313.166	470.446	297.806		360.335	115.603		326.588	100.518
90.877	373.369	499	277	289	287.408	551.127	312.611	257	289.796	341.815	237.796	277.796	603.981	310.223	456.573	287.796		353.268	112.206		320.32	98.511
91.1981	368.933	487.787	271	280	287.64	539.799	307.213	252	285.573	332.067	235	273.787	599.506	303.067	443.72	276.573		346.479	110.686		314.155	96.1554
91.5192	363.554	473.108	268	272.223	290.892	539.879	301	249	283.108	323.338	232	271.777	600.439	292.892	430.885	266.331		341.152	110.683		307.808	94.0424
91.8403	354	455.605	268.767	266.465	300.162	542.978	295.535	247.232	281.07	319.162	227.768	270.233	602.373	282.465	418.605	258.535		336.935	110.634		300.967	92.1287
92.1615	341.242	438.306	272.274	261.968	317.452	540.611	295.032	246.726	279.79	318.968	222	269.242	603.064	273.484	405.064	254.758		333.749	109.336		294.564	90.5494
92.4826	326.252	423.239	277.49	260.258	341.51	524.981	296.994	244.258	278.994	322.755	216.748	267.755	601.232	268	392.736	254		331.075	106.263		289.048	89.1815
92.8037	312	411.911	281.65	260.306	367.306	500.65	300.955	239.567	277.217	329.522	210.739	267.045	596.083	263.739	384.389	255		328.63	102.788		284.322	88.3008
93.1248	299	405.564	283.022	260.353	383.812	472.376	303.188	233.624	276.188	336.271	204.729	266.353	585.127	260.729	378.834	256.729		325.369	98.9544		280.622	87.7473
93.4459	290.28	402.478	280.197	260.121	383.56	450.159	303.159	227.401	273.879	340.28	200.72	265.962	569.675	258.44	378.318	256.44		321.317	95.1918		277.288	87.4331
93.7671	285.869	402.392	274.682	258.869	367.869	435.42	302.131	223.159	269.551	341.58	196	264.608	549.783	256.42	380.131	253.841		316.394	91.3372		274.736	86.9914
94.0882	285.197	404.006	267.204	257.599	345.898	427.401	300.803	220.898	264.503	341.497	192.299	262.994	527.51	253.701	381.401	247.803		311.295	87.8143		272.201	86.7014
94.4093	285.545	404.911	259.455	257.309	328.927	421.382	300.147	218.309	261.455	340.471	189.309	261.089	503.911	250	379.382	240.764		306.398	84.4791		270.196	86.9933
94.7304	285.229	407.497	251.726	257	322.955	415.363	300.771	217	260.726	337.185	188.319	260.185	481.089	244.319	373.045	233.681		302.256	81.3255		268.75	89.168
95.0515	282.296	410.736	244.688	256	324.984	409.344	299.704	216.016	261.688	329.952	188	260.28	460.344	238.328	365.688	230		298.628	78.4814		268.385	93.2167
95.3727	277.026	412.611	239.312	253	326.35	403.987	296.65	214.65	264.312	317.363	187.662	259.376	442.338	232.338	362.312	227.675		294.81	76.2762		269.398	98.8336
95.6938	272.083	413.487	235.264	249	320.083	399.611	290.653	212.612	263.917	300.041	188.306	258.818	425.389	227	367.223	226.694		290.636	74.6168		271.511	105.981
96.0149	269.14	414.363	232.217	243	302.853	394.217	283.713	208.573	260.503	280.357	188.287	256.28	410.497	222.357	383.076	224.07		285.844	74.5743		274.594	114.028
96.336	267.465	418.605	232.169	237.366	276.93	387.535	278.465	203.268	254.803	262	188.634	252.761	394.564	219.732	407.14	219.465		281.306	76.3958		276.87	122.186
96.6571	263.879	425.866	233.873	233.752	249.631	380.121	273.879	198	250.497	247	189	247.637	376.255	218.127	434.733	214.503		277.297	80.0031		277.073	128.362
96.9783	257.927	433.532	236.615	231.156	226.541	372.459	269.927	196	248.615	234.385	187.771	240.551	357.771	215.927	460.825	211.156		273.822	84.4589		275.129	131.543
97.2994	249.369	438.026	239.395	228.58	211	365.815	265.58	196.395	248.79	222.395	184.79	231.713	339.605	213.975	480.363	209.79		270.349	88.2088		272.145	132.793
97.6205	241.427	439.978	240.405	225.618	202.595	360.787	261.618	196.809	248.618	211.405	179.618	222.876	325.382	211.213	492.248	211.405		267	91.0144		269.721	132.864
97.9416	233.898	440.93	241.414	222.656	199.172	356.586	260.242	195.242	246.07	200	174.656	214.038	315.516	209.242	495.752	213.414		263.677	92.6502		268.308	132.713
98.2627	228.388	442.611	241.576	220.424	197.729	353.424	261.424	189.847	241.271	189.576	169.694	205.353	309.882	209.424	492.869	215.576		260.567	93.6217		267.043	133.146
98.5839	224.465	444.236	243.701	219	196.701	351.166	261.567	182.433	236.866	182.567	167.166	197.631	305.701	212.433	488.006	216.567		258.138	94.0558		265.873	134.562
98.905	222.099	444.245	251.344	217.115	195.115	349.541	259.115	176	232.443	178	168.213	191.312	303.115	214.885	488.162	216		256.669	94.8397		265.726	140.945
99.2261	220.166	442.121	263.478	215.095	193.095	347.07	254.191	171.095	230	177	169.809	186.975	301	216.452	497.242	215.452		256.265	96.4908		268.549	159.606
99.5472	217.771	437.382	278.997	212.615	189.538	344.233	248.691	168.615	229	178	172.385	185.08	298.924	215.924	514.841	214.462		256.653	99.2182		275.056	195.065
99.8683	215.299	431.229	296.401	211.115	186.057	343.885	242.643	169.115	229	180.471	174.943	183.713	296.943	214.414	531.873	212.471		257.473	101.965		284.471	242.11
100.189	212.885	423.596	310.748	208.557	183.557	347.481	238.557	170.557	232.519	183	178	183.328	297.443	211.443	543.038	210		258.419	103.852		294.277	289.342
100.511	210.943	417.019	321.115	206.038	183.548	355.51	235.019	173.019	240.038	183	179.51	182.924	300.471	209.452	544.414	207.51		259.346	104.385		301.78	326.526
100.832	211	414	328	203.5	187.5	365	231.5	174.5	255	180	180	181.5	306	209.5	541	205		260.812	104.552		306.5	349.675
Distance	hec123_TCS_#21	20	19	18	17	16	15	14	13	12	11	10	9	8
0	236.5	178.5	189	357.5	239	305	188	220.5	209.5	162.5	221.5	220.5	168	645
0.3211	237	183.51	186.962	357.51	239	300.452	189.51	224.529	207.51	163.49	220.981	218.49	168.51	641.962
0.6422	237.481	188.038	182.443	355.038	235.962	293.924	191.519	226.076	205.519	165	221.481	219	168.519	633.962
0.9634	237.471	192.529	177.471	352.586	232.471	286.471	193.057	226.586	204	167.057	220.529	223	168.529	616.529
1.2845	237.462	195.538	173	351.076	231.462	280.076	196.076	226.538	203.924	170.615	220.076	229.538	169.462	590.076
1.6056	237.452	196.452	171.548	353.548	233	275.739	198.095	229	206.357	174.191	217.643	238.548	171.452	558.096
1.9267	237	196	173.557	360.557	235	275.901	199.557	233.443	209.213	177.672	215.672	248.557	174.443	524.672
2.2478	236.567	195.567	179.567	372.134	236	281.535	201	241	212.599	179.701	214.701	258	178	494.701
2.569	236.153	195.576	187.153	384.882	235.424	294.035	202.424	251.576	216.388	180.729	214.729	266	180.424	471.153
2.8901	237.758	196.586	194	395.102	233.414	311.102	202.828	261.758	220.726	180.344	217.172	271.414	181.414	452.586
3.2112	239.382	197.595	199	399.764	230.809	330.978	203.595	269.382	224.64	179.382	220.191	275.809	180.809	439
3.5323	241.631	198.395	200.395	399.446	230.185	347.815	204.815	273.631	230.554	177.815	222.815	280.79	179.79	427.395
3.8534	242.073	199.385	201.771	399.761	231.927	358.229	205.688	276.688	238.083	179.229	224.229	288.771	178.771	417.385
4.1746	242.121	200	202.752	403.49	236.255	361.624	206.745	281.745	248.006	183.248	224.873	300.127	179.752	407.752
4.4957	241.901	200.634	204.366	411.873	245.564	360.267	207.803	289.803	258.296	188.268	226.901	313.733	182	398.733
4.8168	242.287	201.287	207.357	420.65	257.497	357.287	208.86	300.86	267.21	192.287	229.93	326.357	183.643	391.427
5.1379	244.306	201.959	209.347	425.099	270.389	355.959	209.612	312.223	274.124	195.959	233.612	336	184.959	385.736
5.459	247.987	200.987	211.675	425.924	280.338	358.325	209.325	321.299	280.038	198.65	235.987	341.662	185.312	381.688
5.7802	253.016	200.688	215.312	426.096	286.344	366	208.344	327.704	284.952	200.688	237.016	344.672	185.36	378.984
6.1013	258.726	199.726	222.229	429.586	288.045	377.637	207.681	332.089	292.229	201.726	240.045	347	185.408	376
6.4224	265.764	198.382	232.471	434.675	286.764	392.545	210	334.073	301.545	202.455	243.382	350.309	185.455	371.073
6.7435	272.102	197.401	245.293	437.707	284.102	412.096	215	336.701	314.898	203.204	248.701	355.599	185.102	364.204
7.0646	278	196.71	257.767	436.971	281.71	435.739	221	341	332.58	203.261	253.71	364.449	184.42	352.971
7.3858	283.841	197.72	269.204	435.159	281.28	463.121	227	346	350.841	203.599	256	377.242	184.44	339.038
7.7069	288.624	199.729	277.331	436.729	282.812	492.459	231.729	350.729	367.541	205.188	255.541	392.707	184.459	326.376
8.028	295.134	202.739	281.178	443.261	287.045	519.911	237.478	352.217	381.261	209.478	254.045	407.134	184.739	317.694
8.3491	305.277	205.497	281.522	453.252	291.258	543.226	244.742	348.994	390.748	213.748	254.258	416.767	186.748	314.245
8.6702	317.841	208.274	278.147	464.484	293.968	556.433	253.306	345.032	396.758	217	255.694	422.178	189.758	315.516
8.9914	330.65	210.07	274.325	473.465	291.93	558.025	261.443	343.303	400.767	219.232	260.092	425.93	193.232	318.767
9.3125	340.013	212.108	270.338	478.669	287.669	548.975	267.325	345.554	406.223	221.446	267.675	433	195.669	321
9.6336	346.987	215.933	268.64	481.067	284.213	534.678	272.226	351	411.64	225.427	277.987	445.147	196.64	321.213
9.9547	352.834	220.777	267.408	484.019	284	521.459	274.554	357.204	414.019	230.204	290.261	458.981	195.612	320.408
10.2758	359.166	225.64	269.194	488.36	288.417	513.978	275.252	362	407.554	237	304.303	470.446	194.388	320.583
10.597	366.739	231.522	272.185	494.662	296.076	511.752	277.707	363.631	393.032	243	317.51	475.522	194.185	322.554
10.9181	373.876	235.774	275.526	501.102	304.774	514.373	283.949	362.124	374.627	249	331.328	477.424	195	326.701
11.2392	379.994	241.841	279.497	504.815	313.841	517.675	297.675	361.51	359.815	252	344.312	478.841	197	331.828
11.5603	384.248	247.064	281.78	506.433	324.908	520.376	317.44	364.283	352.809	254.156	356.433	482.22	200.688	337.936
11.8814	387.318	254.268	281.879	508.516	336.121	517.707	342.389	372.535	355.344	257.147	369.369	484.707	203.56	344.026
12.2026	392.233	261.452	282.822	511.56	348.315	511.589	365.631	387.767	366.917	264.137	384.15	486.137	206.452	350.096
12.5237	399.147	267.618	284.637	519.057	359.363	500.745	384.108	407.726	387.401	273.255	401.93	486.127	209.363	355.019
12.8448	408.943	271.647	287.353	530.239	367.411	488.764	394.764	428.822	411.178	284.236	424.592	486.118	212.529	358.825
13.1659	418.866	271.783	290.217	542.624	374.35	479.108	401.217	446.917	432.974	293.217	450.057	490.108	216.567	361.758
13.487	427.691	269.901	294.197	557.086	379.309	474.494	408.494	463.111	447.79	300.197	473.58	500.197	219.803	367.592
13.8082	435.446	265	297.267	573.803	383.376	475.892	422.535	476.465	455.624	304.178	491.892	517.268	222.732	378.624
14.1293	444.159	259	301.239	595.478	387.283	480.115	447.478	490.761	458.557	303.239	501.318	537.318	223.761	397.796
14.4504	454.93	252	304.35	621.28	390.44	484.051	484.28	508.93	462.49	301.21	504.93	555.14	224.72	422.981
14.7715	467.758	245.94	311.363	649.121	396.516	485.847	530.061	529	470.363	299.182	507.637	566	223.758	450.15
15.0926	482.643	241.949	322.357	673	406.643	487.56	576	549	481.306	298.051	512.592	568.847	223.745	476.172
15.4138	492.669	241	336.248	690.917	420.752	494.29	614.083	564	496.29	298.959	525.627	567.834	222.834	499.076
15.7349	495.777	244.968	352.127	701.841	437.777	506.064	641.223	571.032	512.223	301.873	543.713	566.841	221.905	517.86
16.056	492.911	249.978	366	706.866	452.866	519	658.357	574.067	527.156	306.889	563.822	564.933	221.955	531.557
16.3771	488.987	255.987	375.962	711.911	466.911	531	666.318	574.064	537.102	314.936	579.924	560.987	220.987	539.293
16.6982	488.003	260.997	382.984	720.978	476.978	540.006	672.096	574.025	540.025	325.987	588.994	555.006	220.997	544.073
17.0194	493.006	263.013	393.057	735.032	483.038	548.962	680.847	574.955	537.911	337.026	591.994	548.013	222.013	550.86
17.3405	505.016	262.032	408.207	752.08	484.127	556.92	695.697	575.857	533.777	348.032	591.92	546.048	224.016	562.666
17.6616	521.051	260.051	431.382	767.153	481.306	565.898	713.694	577.771	533.592	357	588.822	556.025	227	577.541
17.9827	540.175	258.07	459.56	776.28	478.526	573.93	728.825	580.755	536.439	364.965	587.58	581.895	230.93	591.51
18.3038	565.401	257.089	487.803	781.535	478.758	583.089	734.955	584.822	542.331	374	590.197	620.688	234.822	602.554
18.625	598.704	258.108	510.974	785.92	486.866	595.325	729	586.946	547.459	387.054	595.701	667.513	239.729	609.513
18.9461	637.955	261.191	525.274	792.401	501.764	609.637	711	587	553.809	404.255	606.217	708.682	244.681	613.363
19.2672	674.318	265.22	534.465	802.831	521.513	623.952	683.854	585	562.439	426.513	625.949	736.22	251.634	615.975
19.5883	698.573	270.166	541.573	814.236	538.331	639.159	655.586	583.083	573.994	448.911	656.847	746.911	257.669	616.51
19.9094	708.939	275.185	550.662	828.586	551	653.385	632.354	588.092	588.293	467.385	697.153	747.385	262.631	617.061
20.2306	711.038	281.204	564.834	848.955	560.796	670.427	621.287	604.102	602.325	478.936	739.675	746.325	264.796	621.554
20.5517	707.229	286.334	581.229	878.121	571.666	689.449	622.443	629.334	617.892	484.341	777.997	750.78	265	630.213
20.8728	701.057	293.242	598.541	914.268	586.637	711.452	630.879	661.363	635.242	485.299	807.274	763.121	266.242	643.096
21.1939	692.697	301.131	612.873	951.525	605.608	735.697	639.392	692.131	654.478	483.35	828.086	780.739	269.392	659.519
21.515	685.541	310.14	624.943	980.924	622.58	759.242	643.841	713.58	674.459	481.382	842.019	800	274.56	678.898
21.8362	688.197	320	634.994	995.64	635.401	778.143	644.898	723.803	690.755	482.545	852.952	820.449	280.599	695.503
22.1573	706.955	329	643.866	995.618	641.363	789.299	645.955	724.771	703.815	489.866	864.045	841.478	285.637	706.885
22.4784	742.182	336	654.532	984.882	644.494	794.401	650.844	721.131	716.455	506.376	879.156	858.169	290.675	713.818
22.7995	788.427	341	671.783	971.497	645	796.064	660.713	716.79	737.076	534.567	896.465	864.822	294.07	722.395
23.1206	836.879	342.188	696.939	962.127	645.564	794.389	674.564	715.806	771.242	570.758	915	858.812	296.503	737.745
23.4418	874.567	340.197	728.803	959	648.382	787.516	688.79	719.841	821.051	611.752	932	846	295.974	761.038
23.7629	893.312	335.621	760.965	961.586	655.863	776.417	699.242	729.481	883.239	652.14	944.379	835.621	292.484	793.481
24.084	893.115	331.866	792.484	967.567	667.732	764.28	709.166	743.885	951.503	684.764	953.268	837.083	291.382	833.102
24.4051	879.522	331.131	823.417	976.226	680.904	754.105	723.392	761.478	1019.86	706.201	959.834	850.809	294.035	875.704
24.7262	859.949	335.178	854.586	986.65	690.293	750.656	745.185	780.287	1084.28	715.185	965.522	874.828	301.65	915.287
25.0474	845.64	343.736	887.529	997.452	696.057	755.15	773.866	797.076	1140.15	715.414	967.096	907.924	310.981	939.341
25.3685	844.879	357	924.726	1003.55	702.65	769.096	803.408	809.197	1184.63	711.312	962.688	946.586	318.764	940.414
25.6896	861.93	376.943	965.678	1005.59	714.599	791.287	828.516	815.678	1218.24	709.379	956.736	991.494	323.529	922.035
26.0107	894.217	404.809	1000.9	1006.18	733.688	819.204	846.038	819.274	1244.89	715.096	955.287	1038.66	324.096	899.713
26.3318	931.653	439.599	1021.58	1010.03	755.796	850.818	856.369	825.417	1269.32	729.567	964.369	1084.82	323.417	888.166
26.653	959.032	473.191	1017.66	1020.97	777.745	882.809	863.395	833.637	1294.48	752.121	988.134	1121.57	322.758	892.949
26.9741	966.959	499.672	995.067	1035.92	796.621	909.025	873.605	842.538	1315.97	779.58	1026.22	1142.05	324.815	911.79
27.2952	954.178	514.127	963.07	1054.32	812.197	921.873	887.815	850.242	1325.5	808.567	1078.54	1140.87	330.873	938.312
27.6163	931.041	522	933.28	1071.99	826.567	919.643	906.783	854.398	1315.39	835.818	1140.08	1122.72	341.93	967.608
27.9374	911.618	528.325	915.395	1085.71	839.369	912	930.35	856.28	1290.01	857.35	1195.25	1100.28	354.987	999.987
28.2586	905.815	535.704	910.436	1093.23	849.548	911.341	960.637	860.519	1260.68	871.318	1228.77	1086.84	367.704	1034.7
28.5797	915.904	544.051	918.14	1098.9	858.395	920.102	996.701	870.758	1242.75	878.102	1233.45	1092.96	376.752	1071.35
28.9008	939.799	551.36	934.283	1110.28	866.682	929.678	1032.16	890.277	1240.52	878.959	1215.61	1122.88	382.44	1105.56
29.2219	976.522	560.631	957.873	1133.89	878.414	929.758	1055.59	913.127	1247.32	873.064	1189.2	1174.89	382.108	1129.94
29.543	1030.45	575.242	989.936	1169.73	894.379	919.854	1063.52	933.443	1247.79	860.274	1168.23	1241.97	377.758	1141.18
29.8642	1113.62	598.446	1025.11	1216.34	915.108	912.879	1062.22	946.662	1233.5	841.446	1159.58	1315.89	372.389	1142.29
30.1853	1234.45	627.611	1055.61	1270.03	936.777	925.545	1067.22	954.787	1209.58	819.631	1158.32	1385.6	367.796	1142.26
30.5064	1381.59	654.146	1076.18	1321.07	953.484	968.822	1091.22	960.408	1192.04	798.994	1162.58	1442.04	367.631	1147.32
30.8275	1520.9	668.08	1084.25	1359.32	962.503	1038.77	1131.4	967.166	1191	782.815	1170.97	1479.5	371.086	1158.56
31.1486	1605.33	662.439	1083.41	1376.03	965.72	1118.36	1178.94	975.293	1204.44	776.637	1183.08	1493	376.987	1172.21
31.4698	1608.46	638.382	1077.8	1372.89	967.764	1181.14	1224.57	986.946	1220.2	786.729	1199.42	1484.07	383.054	1185.29
31.7909	1544.55	602.879	1070.35	1359.76	972.975	1206.05	1265.59	1002.65	1227.76	815.624	1212.95	1453.87	387.675	1195.95
32.112	1450.55	564.357	1065.19	1349.71	982.347	1191.48	1299.23	1023.89	1231.17	861.615	1218.61	1411.17	390.733	1210.06
32.4331	1366.44	529.35	1064	1349.17	994.49	1154.34	1322.73	1045.98	1239.1	918.701	1211.33	1367.35	392.79	1232.59
32.7542	1312.17	501.729	1063.68	1358.09	1008.58	1119.18	1336.93	1062.29	1260.98	973.831	1192.07	1334.15	394.898	1271.66
33.0754	1285.87	485.611	1061.68	1371.93	1023.29	1101.55	1341.03	1064.45	1293.83	1016.55	1170.25	1322.1	396.42	1327.32
33.3965	1274.96	481.026	1058.06	1390.17	1035.81	1106.86	1335.94	1047.62	1327.15	1040.94	1156.84	1330.57	397.974	1394.09
33.7176	1271.03	485.497	1054.99	1411.93	1041.64	1134.54	1317.06	1012.98	1348.41	1046.07	1158.31	1346.44	400.013	1451.97
34.0387	1268.72	497.051	1054.08	1436.31	1040.69	1182.59	1282.31	968.564	1354.13	1033.38	1174.18	1354.67	402.026	1479.03
34.3598	1268.97	509.178	1052.36	1457.34	1034.29	1245.57	1235.54	924.79	1352.24	1007.71	1196.53	1347.38	403	1465.27
34.681	1270.64	516.787	1046.23	1473.47	1029.32	1313.06	1186.17	892.573	1352.26	977.019	1220.49	1331.7	402.468	1422.11
35.0021	1274.2	516.331	1037.54	1484.71	1027.61	1365.46	1145.04	881.911	1356.34	950.783	1244.22	1324.25	398.917	1369.29
35.3232	1280.82	509.306	1030.67	1484.51	1025.69	1382.14	1117.1	894.876	1359.61	931.529	1272.86	1330.59	394.898	1323.26
35.6443	1293.09	503.242	1035.65	1465.41	1022.5	1354.71	1098.96	931.618	1354.87	917.255	1312.18	1346.48	392.318	1292.92
35.9654	1312.68	501.71	1055.41	1427.97	1019.54	1291.74	1081.31	984.513	1342.16	904.822	1366.03	1361.25	393.29	1277.72
36.2866	1338.65	507.739	1088.06	1383.23	1019.53	1215.41	1058.67	1043.82	1324.74	893.752	1432.41	1369.92	398.102	1278.73
36.6077	1364.91	516.768	1126	1346.03	1024.36	1144.81	1030.09	1099.23	1303.84	883.016	1508.27	1375.35	403.465	1293.27
36.9288	1383.37	524.395	1162.41	1321.75	1033.81	1094.82	998.038	1144.93	1280.17	871.586	1590.04	1380.51	408.21	1317.04
37.2499	1386.6	527.433	1192.92	1304.63	1047.83	1070.27	963.752	1177.85	1257.77	858.258	1667.45	1385.45	413.134	1339.14
37.571	1372.83	525.707	1219.06	1287.31	1068.7	1070.88	926.172	1201.13	1244.65	842.089	1722.9	1389.19	420.057	1344.32
37.8922	1346.94	522.019	1241.12	1263.66	1104.43	1090.45	883.962	1220.74	1249.88	828.392	1737.69	1388.8	430.236	1323.2
38.2133	1316.47	517.369	1260.91	1234.31	1158.9	1116.71	839.541	1238.94	1281.18	820.006	1712.99	1386.04	444.452	1276.54
38.5344	1289.81	513.404	1275.88	1206.44	1229.83	1141.54	795.354	1253.39	1341.89	816.051	1669.65	1381.85	458.353	1219.24
38.8555	1270.81	508.841	1289.28	1189.18	1302.34	1158.63	753.656	1259.15	1421.13	813.185	1635.9	1375.46	467.968	1167.72
39.1766	1258.99	501.65	1302.33	1188.3	1357.01	1168.03	719.997	1249.61	1494.01	807.322	1627.65	1364.29	470.662	1134
39.4978	1253.95	487.777	1313	1205.45	1380.85	1174.2	697.376	1224.38	1530.52	802.701	1647.48	1345.31	467.726	1117.43
39.8189	1262.73	468.478	1311.32	1239	1378.77	1178.58	688.478	1186.33	1514.2	809.315	1687.38	1317.43	462.478	1111.32
40.14	1288.42	448.471	1286	1287.97	1360.54	1182.17	694.72	1140.66	1455.92	832.529	1734.66	1281.33	461.248	1108.36
40.4611	1327.81	433.519	1233.89	1348.4	1342.62	1181.26	716.484	1094.04	1383.11	872.777	1775.6	1238	467.927	1103.82
40.7822	1363.45	422.707	1168.29	1410.17	1334.33	1179.12	750.688	1048.86	1323.77	923.146	1799.55	1194.15	484.567	1099.68
41.1034	1376.77	414.121	1107.88	1460.59	1339.96	1182.58	792.748	1009.32	1291.84	973.892	1806.51	1153.83	510.446	1093.47
41.4245	1361.46	402.185	1068.82	1491.89	1356.71	1200.43	836.497	976.815	1286.19	1013.99	1801	1119.2	543.465	1085.64
41.7456	1323.65	385.841	1059.9	1506.84	1382.19	1231.52	875.134	956.901	1296.22	1031.55	1792.29	1087.68	575.968	1075.26
42.0667	1280.03	365.529	1080.22	1516.75	1416.92	1270.11	900.07	951.223	1309.43	1018.55	1786.74	1055.78	601.013	1059.04
42.3878	1243.75	344.656	1125.87	1528.72	1461.23	1306.52	906.162	958.583	1312.54	978.073	1788.15	1027.27	610.611	1035.7
42.709	1222.41	326.936	1188.15	1543.06	1512.32	1334.24	893.809	977.21	1293.85	923.809	1789.9	1005.35	602.624	1008.79
43.0301	1217.26	313.462	1253.44	1553.3	1560.99	1347.33	870.264	1001.74	1246.61	871.726	1785.25	992.188	583	986.583
43.3512	1219.27	303.949	1306.84	1554.41	1595.61	1337.54	845.529	1028.41	1177.8	831.586	1772.93	987.115	555.892	973.529
43.6723	1220.6	297.796	1341.61	1551.82	1603.25	1301.6	826.599	1052.02	1110	806.389	1759.64	989.987	526.608	968.398
43.9935	1216	293.045	1364.2	1551.2	1585.71	1249.34	813.618	1070.73	1062.63	794.325	1751.9	1003.9	499.484	964.764
44.3146	1207.91	290.092	1390.08	1552.09	1558.61	1203.72	802.548	1086.35	1048.62	792.822	1749.61	1029.18	480.271	960.36
44.6357	1203.38	287.312	1425.3	1548.38	1543.35	1183.92	786.732	1099.71	1062.29	797.28	1754.96	1063.24	469.172	958.955
44.9568	1207.81	283.513	1458.44	1540.51	1551.61	1195.27	761.452	1109.98	1091.28	798.538	1772.34	1097.39	466.188	966.71
45.2779	1216.69	276.847	1470.31	1541.01	1575.73	1226.38	728.65	1114.88	1119.66	785.624	1798.56	1122.66	462.93	982.35
45.599	1224.71	267.857	1452	1566.99	1596.88	1260.72	689.984	1113.31	1140.44	751.854	1821.3	1133.31	455.14	1001.88
45.9202	1225.13	257.733	1414.53	1626.25	1598.29	1284.67	650.854	1107.48	1153.87	702.93	1819.07	1133.55	442.599	1018.15
46.2413	1221.01	247.876	1376.88	1708.03	1573.33	1290.5	614.895	1101.6	1166.26	653.634	1778.25	1132.96	429.248	1027.96
46.5624	1214.94	241	1351.77	1788.45	1523.03	1273	579.822	1098.55	1183.71	617.51	1703.97	1136.82	420.917	1029.27
46.8835	1210.9	240.105	1340.63	1843.27	1447.78	1232.16	543.529	1095.73	1208	606.213	1617.58	1145.36	419.051	1026.1
47.2047	1204.99	242.287	1334.43	1857.28	1352.4	1178.18	505.949	1085.2	1230.04	621.185	1538.1	1156.82	418.955	1022.87
47.5258	1189.54	247.43	1327.89	1834.23	1244.56	1129.33	470.312	1056.89	1242.26	658.194	1472.26	1171.69	415.602	1023.55
47.8469	1158.62	253.382	1311.83	1795.62	1140.98	1094.25	442.465	1008.61	1235.45	703.471	1419.77	1192.92	406.306	1027.46
48.168	1113.67	258.267	1280.27	1765.33	1057.81	1075.46	421.599	949.271	1212.21	738.997	1380	1217.6	396.933	1034.73
48.4891	1057.26	266.057	1227.46	1751.74	1007.97	1067.82	407.656	894.745	1181.24	753.312	1359.45	1237.48	388.771	1046.2
48.8102	998.338	276.857	1156.76	1750.33	989.478	1069.09	399.618	856.287	1155.82	741.57	1365.28	1234.52	384.761	1060.95
49.1314	945.108	291.733	1075.43	1747.43	994.191	1081.36	399.541	836.115	1141.22	709.732	1389.62	1198.62	383.771	1079.04
49.4525	904.831	310.656	997.398	1731.91	1011.06	1110.65	407.541	831.086	1136.77	669.771	1413.23	1136.66	385.857	1098.37
49.7736	878.554	332.656	934.599	1698.5	1027.02	1159.04	422.637	833.115	1137.5	629.847	1415.69	1072.69	391.924	1117.75
50.0947	863.306	356.79	893.818	1653.86	1036.99	1223.52	441.809	834.105	1136.26	595.943	1380.93	1031.82	404.971	1143.96
50.4159	856	381	873	1612	1038	1294	459	832	1132	570	1314	1032	424	1191
50.737	853.666	405.153	865.124	1586.32	1031.04	1355.03	471.086	826.924	1130.9	551.048	1233.07	1068.14	442.019	1274.15
51.0581	856.389	425.229	859.21	1582.88	1017.17	1400.75	477.981	818.809	1141.85	537.057	1155.27	1123.19	450.924	1391.19
51.3792	863.283	439.201	846.287	1597.58	1001.43	1430.23	483.713	807.713	1169.83	529.086	1089.49	1174.14	442.742	1516.11
51.7003	871.465	442.153	828.344	1612.29	986.764	1453.62	493.274	799.58	1215.77	528.191	1032.69	1206.96	418.541	1611.89
52.0215	879.904	433.096	812.43	1612.96	978.146	1482.09	508.71	796.427	1270.76	532.287	985.812	1223.57	386.379	1650.47
52.3426	885.459	419	810.459	1596.67	973.605	1517.76	530.223	799.369	1326.6	535.344	953.975	1235.91	354.427	1634.8
52.6637	890.803	407.933	822.334	1574.35	972.073	1549.93	553.127	807.398	1371.4	535.268	943.07	1256.99	327.599	1588.99
52.9848	899.688	403.847	842.076	1563.82	977.446	1568.85	578.318	820.541	1403.78	531.076	951.994	1292.1	307.847	1547.17
53.3059	916.516	403.914	858.828	1574.82	997.322	1570.43	600.968	835.914	1429.85	522.742	963.86	1337.56	295.086	1532.3
53.6271	945.478	405.382	864.427	1609.3	1045.43	1559.39	621.809	851.382	1458.94	512.236	963.86	1384.94	287.287	1550.8
53.9482	985.946	407.946	854.054	1667.47	1136.11	1542.89	647.42	864.631	1500.43	502.529	947.366	1422.74	283.315	1597.59
54.2693	1030.06	410.72	830.624	1745.98	1277.74	1529.36	683.688	878.573	1544.02	494.822	924.637	1448.83	279.459	1665.18
54.5904	1075.48	413.484	801.261	1828.23	1457.26	1527.35	729.497	897.752	1572.63	491.267	910.844	1472.84	276.373	1738.91
54.9115	1126.95	416.675	774.127	1896.41	1633.39	1549.41	772.465	923.529	1576.4	493.924	915.357	1515.63	272.267	1798.38
55.2327	1196.73	417.436	754.994	1939.16	1750.85	1599.16	797.85	952.564	1560.15	501.847	937.315	1582.75	268.143	1818.84
55.5538	1287.5	414.987	747.554	1961.95	1774.32	1676.27	803.025	981.096	1540.46	512.79	968.936	1661.62	265.153	1782.58
55.8749	1384.55	411.137	749.427	1975.93	1708.59	1763.82	796.803	1002.73	1530.19	526.914	1004.1	1726.93	266.325	1692.15
56.196	1462.44	403.516	756.529	1986.77	1600.98	1840.02	794.809	1018.14	1530.62	543.248	1044.88	1763.3	271.688	1570.36
56.5171	1502.9	396	762.736	1990.53	1502.01	1883.81	802.102	1031.91	1534.09	559.822	1094.36	1772.55	281.908	1448.55
56.8383	1498.68	389.618	765.032	1989.79	1445.21	1897.96	813.357	1048.48	1535.38	575.471	1158.91	1767.93	291.955	1349.32
57.1594	1457.41	386.197	766.188	1992.23	1435.38	1901.39	823.975	1070.21	1530.01	589.796	1240.8	1761.17	301.003	1285.59
57.4805	1394.47	387.159	770.478	2012.61	1461.17	1913.85	832.433	1093.15	1520.78	605.159	1335.11	1757.23	309.631	1254.69
57.8016	1328.22	392.56	780.561	2058.28	1507.46	1941.7	840.627	1111.42	1512.15	621.561	1428.7	1747.99	318	1244.58
58.1227	1276.62	400.229	797.376	2119.13	1567.46	1987.02	847.414	1120.46	1509.4	639.771	1497.64	1725.79	327.771	1243.48
58.4439	1246.13	409.194	817.344	2176.05	1630.76	2043.85	849.85	1119.61	1513.61	657.717	1521.75	1682.06	340.522	1250.89
58.765	1236.03	416.236	834.217	2213.66	1686.03	2098.76	843.745	1109.78	1519.38	676.49	1497.54	1613.43	358.752	1269.03
59.0861	1235.58	420.611	838.965	2231.19	1718.68	2125.97	825.354	1095.78	1518.18	694.548	1442.26	1531.77	383	1303.32
59.4072	1227.78	423.28	829.49	2240.38	1714.15	2095.47	793.35	1083.24	1504.88	709.605	1384.17	1455.8	411	1351.78
59.7283	1201.86	424.264	810.481	2250.81	1668.56	1991.28	754.818	1071.35	1480.32	722.831	1345.75	1405.78	435	1406.13
60.0495	1156.68	424.019	787.879	2259.74	1591.63	1828.72	717.586	1056.7	1449.51	733.573	1335.11	1391.07	447.14	1449.97
60.3706	1101.93	424.108	770.22	2251.63	1500.97	1645.67	691.666	1038.52	1415.21	741.296	1354.04	1408.69	448.223	1464.63
60.6917	1048.05	427.56	760.42	2217.89	1412.04	1482.06	680.306	1021.61	1374.43	746.611	1401.69	1449.15	443.86	1434.91
61.0128	998.217	435.774	761.306	2168.57	1337.05	1357.89	681.424	1012.89	1328.3	748.946	1469.28	1497.12	443.793	1366.6
61.3339	952.624	447.72	774.172	2127.34	1283.41	1275.7	691.726	1016.6	1284.82	750.975	1537.25	1539.29	450.026	1276.63
61.6551	911.357	461.704	798.682	2111.72	1257.25	1226.32	706.99	1027.68	1255.67	752.003	1576.98	1571.68	461	1190.29
61.9762	877.038	479.038	832.096	2116.04	1258.33	1195.37	722.248	1040.72	1251.46	749.688	1560.59	1602.94	470.688	1126.55
62.2973	854.908	501.08	870.414	2123.57	1276.74	1169.63	736.818	1054.35	1274.57	745.646	1484.83	1644.28	477.707	1092.45
62.6184	847.879	529.522	907.637	2123.59	1298.38	1143.29	749.732	1067.82	1318.76	740.548	1372.71	1696.01	481.089	1084.03
62.9395	857.494	559.904	937.764	2118.65	1308.92	1116.94	762.646	1082.41	1371.9	737.764	1261.79	1751.55	483.745	1093.35
63.2607	885.637	586.287	957.414	2114.83	1303.94	1104.12	778.178	1095.21	1419.39	737.325	1179.43	1800.74	485.147	1107.86
63.5818	931.978	604.885	967.774	2112.91	1290.78	1116.08	798.083	1100.82	1449.8	741.083	1132.24	1834.56	486.783	1118.25
63.9029	992.261	611.643	969.962	2108.34	1279.01	1156.8	822.185	1094.97	1456.5	749.783	1111.65	1844.37	491.803	1119.77
64.224	1062.49	608.914	963.799	2100.01	1274.16	1213.64	844.248	1076.78	1438.38	769.783	1100.74	1817.68	502.233	1115.02
64.5451	1135.5	598.51	945.605	2084.2	1279.57	1262.89	858.854	1051.27	1401.6	803.65	1087.93	1752.45	519.943	1112.69
64.8663	1197.77	589.459	914.952	2059.53	1296.17	1287.89	864.691	1029.41	1359.7	849.382	1071.18	1659.8	545.449	1115.98
65.1874	1234.75	586.79	877.573	2021.5	1325.71	1288.75	866.968	1017.73	1321.26	897.178	1056.62	1564.18	578.108	1120.29
65.5085	1235.18	588.083	841.061	1968.96	1366.45	1275.47	872.713	1017.96	1286.36	934.529	1051.06	1486.22	614.471	1113.61
65.8296	1207.38	587.796	809.834	1906.74	1409.2	1259.38	886.955	1024.25	1249.31	954.287	1057.26	1432.33	649.758	1089.87
66.1507	1173.66	581.959	782.959	1847.91	1434.68	1249.89	908.255	1027.6	1206.87	959.127	1071.13	1396.81	681.704	1050.6
66.4719	1152.7	573.599	756.943	1805.34	1428.68	1250.78	935.089	1020.48	1160.69	953.777	1090.59	1369.17	708.166	1007.39
66.793	1154.13	565.745	731.643	1788.15	1392.25	1263.03	959.513	1000.44	1114.84	942.771	1110	1341.28	731.924	972.36
67.1141	1175.03	561.433	712.911	1798.13	1346.17	1282.04	975.994	973.968	1070.69	928.936	1127.38	1313.96	753.503	952.459
67.4352	1209.44	559.14	705.14	1833.77	1311.23	1304.87	979.519	946.596	1028.12	917.089	1138.72	1289.57	770.975	950.57
67.7563	1250.9	556.35	707.255	1888.88	1295.04	1333.13	972.064	926.287	990.108	911.58	1139.99	1267.13	781.42	965.611
68.0775	1288.05	553.561	713.255	1951.83	1292.02	1368.39	954.678	916.933	960.726	913.322	1131.61	1244.63	784.898	992.051
68.3986	1303.89	551.166	714.675	2007.39	1293.51	1404.55	929.35	918.885	944.529	917.904	1118.1	1223.14	778.86	1022.39
68.7197	1287.35	549.624	707.723	2045.39	1293.29	1428.57	897.624	931	941.484	920.296	1108.08	1206.72	764.366	1049.28
69.0408	1241.19	546.217	691.879	2064.13	1289.36	1432.61	861.42	945.242	949.255	916.713	1103.54	1200.54	742.446	1065.12
69.3619	1182.58	536.054	674.637	2066.95	1280.22	1422.4	824.146	951.344	964.108	906.707	1102.64	1199.71	717.436	1063.8
69.6831	1125.01	516.401	662.452	2058.76	1265.66	1417.24	787.318	941.083	983.28	888.79	1099.73	1192.05	694.28	1043.83
70.0042	1075.67	488.927	657.742	2041.74	1241.6	1428.92	751.49	917.768	1004.66	860.019	1093.25	1169.23	674.338	1008.18
70.3253	1027.89	459.522	660.07	2022.07	1205.68	1453.89	720.07	887.229	1027.85	820.045	1089.33	1132.96	655.299	968.006
70.6464	976.369	431.981	662.631	2006.79	1157.93	1473.86	699.232	857.35	1049.06	771.35	1092.82	1097.25	637.369	934.341
70.9675	925.605	410.554	662.783	1997.93	1102.21	1470.68	692.395	830.713	1064.62	722.382	1104.23	1072.62	622.828	912.822
71.2887	884.685	394.242	657.936	1988.42	1042.89	1437.84	698.041	804.854	1073.22	679.927	1118.01	1060.69	616.927	903.99
71.6098	865.433	380.522	647.828	1967.68	987.191	1384.29	708.764	776.344	1075.22	647.694	1124.7	1058.31	622.064	906.127
71.9309	868.879	368.481	632.322	1931.59	945.156	1326.6	717.844	743.076	1074.4	623.959	1122.89	1062.48	634.959	914.959
72.252	891.401	358.197	611.796	1884.38	923.459	1281.95	723.688	708.108	1077.19	607.204	1116.94	1070.25	646.904	926.299
72.5731	922.659	351.933	589.274	1836.92	921.178	1262.36	727.006	676.497	1089.18	593.089	1114.69	1075.64	651.475	931.57
72.8943	951.682	349.35	570.344	1799.22	931.287	1268.98	730.439	652.631	1111.36	581.643	1121.08	1070.68	646.949	923.382
73.2154	972.497	349.427	561.678	1772.22	947.076	1295.5	731.952	636.182	1136.14	574.895	1134.42	1051.39	633.363	901.994
73.5365	984.51	349.127	567	1750.99	963.242	1327.62	728.459	627.057	1153.32	575.185	1148.76	1023.5	612.803	871.573
73.8576	984.621	346.487	586.303	1729.89	979.538	1350.84	719.57	623.236	1155.65	582.513	1156.81	993.975	588.051	842.344
74.1787	973.452	341.535	615.293	1706.77	998.344	1353.17	703.522	624.981	1142.97	590.172	1151.57	969.363	563.809	815.484
74.4999	949.796	337.299	647	1678.16	1021.72	1332.18	684.229	632.385	1122.2	592.134	1129.95	950.583	544.85	790.717
74.821	919.51	337.083	675.452	1640.8	1050.08	1290.32	663.51	641.478	1102.07	586.822	1095.96	936	532.631	765.465
75.1421	890.392	341.885	693.943	1597.65	1079.89	1234.46	647.392	647.551	1087.41	575.529	1059.92	922.793	524.092	742.965
75.4632	868.669	349.217	701.962	1551.27	1105.24	1171.71	639.65	645.605	1076.53	562	1032.43	910.51	518.433	727.586
75.7843	858.793	357.529	701.057	1505.04	1121.23	1107.51	639.85	636.395	1058.9	549.264	1022.53	901.019	511.567	719.414
76.1055	857	362.822	697.229	1457.01	1126.06	1045.63	643.344	623.656	1026.07	536.822	1031.53	899.408	502.643	715.771
76.4266	856.357	364.869	696.704	1403.88	1123.52	989.217	643.669	614.201	973.14	526.643	1054	909.382	487.869	712.939
76.7477	849.516	365.701	701.669	1342.9	1117.76	940.318	639.07	614.548	906.796	518.484	1079.87	930.885	466.567	706.949
77.0688	832.035	364.551	706.481	1276.28	1113.93	900.344	629.962	625.519	840.624	508.758	1097.07	961.86	438.793	698.621
77.3899	805.395	362.223	704.631	1214	1114.57	866.21	617.682	645.369	785.134	495.408	1092.96	997.854	409.605	685.408
77.7111	775.624	357.745	692.624	1168.56	1118.38	835.873	607.551	668.939	749.57	476.812	1063.63	1035.49	383.248	668.309
78.0322	746.643	350.503	672.605	1149.83	1120.04	811.682	599.898	686.465	732.318	456.535	1016.25	1068.01	362.108	648.325
78.3533	724.662	343.637	649.869	1150.08	1111.95	791.793	594.299	690.312	729.519	439.182	962.662	1086.43	346.987	628.793
78.6744	707	342.611	631.503	1152.2	1092.75	773.497	588.567	678.611	735.637	426.592	914.726	1082.95	336.045	615.178
78.9955	690	350.455	623.742	1135.96	1064.31	751.707	581.85	657.605	747.85	416.946	879.653	1054.56	328.102	609.809
79.3167	670	370.197	627.223	1096.54	1032.96	721.338	574.841	635.038	762.159	410.962	860.439	1001.97	321.44	611.076
79.6378	645.131	405.736	634.611	1046.34	1003.08	685.911	568.567	618.433	772.694	404.828	859.522	930.43	317.608	613.127
79.9589	620.363	462.006	635.936	999.701	976.459	652.185	564.178	605.032	773.306	399.331	872.694	852.975	313.879	608.548
80.28	597.334	539.207	624.338	964.328	952.662	626.217	567.229	594.666	759.328	393.003	894.564	778.551	310.223	588
80.6011	576.408	631.395	597.917	941.471	931.592	608.166	575.14	584.306	735.471	385.815	918.65	714.49	306.306	552.713
80.9223	556.277	727.089	563.646	929.522	913.908	593.245	586.755	567.831	706.892	379.462	938.032	660	301.462	509.016
81.2434	537	815.121	529.497	929.51	898	577.344	594.49	544.076	680.338	370.331	949.828	614.166	297.58	468.745
81.5645	519.634	883.653	503.366	940.535	882.927	558.682	593.172	513.099	656.927	359.147	951.561	573.146	295.513	438.44
81.8856	507.299	929.541	487.255	955.662	865.809	538.172	581.892	478.828	640.318	345.064	940.981	535.064	293.51	415.318
82.2067	500.134	953.752	478.217	967.917	843.892	518.675	563.704	447.541	630.487	331.946	924.809	501.054	290.433	396.271
82.5279	497.153	965.994	473.223	972.197	820.045	502.955	545.49	422.267	625.401	322	907.108	474.045	287.312	377.267
82.849	495.299	969.159	469.14	966.545	794.21	489.07	533.315	406.07	621.28	316.035	892.404	455.07	283.245	357.315
83.1701	493.516	964.975	462.102	957.72	769.255	476.026	531.153	396.949	616.127	313.076	878.669	442.102	280.178	340.229
83.4912	490.745	953.366	452.016	946.809	744.223	458.952	536.016	390.952	608.048	311.08	869.841	435.111	279.111	325.143
83.8123	488.917	933.28	438.987	934.879	719.108	439.936	540.975	385.981	598	309.038	866.962	435.057	279.045	314.051
84.1335	488.022	900.701	425.022	915.051	694.975	418.067	539.022	379.971	586.006	305.974	875.041	438.981	280.99	305.987
84.4546	486.013	849.752	415.14	885.255	676.911	398.293	523.115	371.885	573.038	300.873	894.051	444.898	281.974	299.974
84.7757	478.866	780.994	413.29	851.446	663.911	380.468	493.223	360.822	561.089	294.755	914.955	447.799	281	297.955
85.0968	463.713	707.548	417.478	815.637	658.968	365.541	456.255	346.745	551.159	288.65	924.809	444.777	278	297.968
85.4179	442.586	651.268	425.621	777.869	659.041	353.497	418.248	327.71	545.248	283.545	912.793	436.793	271.959	298
85.7391	421.592	624.943	431.662	739.019	662.102	344.357	387.153	306.643	543.306	282.44	874.745	424.949	264.949	298
86.0602	406.697	628.309	433.484	698.331	661.121	338.303	362.121	285.697	544.242	282.334	814.516	416.06	260.94	296.121
86.3813	397.93	649.306	428.14	664.611	654.07	337.14	340.28	267.79	543.07	283.299	743.089	412.07	262	295.14
86.7024	393.239	675.71	414.682	641.911	638.841	337.159	320.557	254.841	536.841	283.283	670.726	414.08	269.159	294.239
87.0235	390.535	696.885	396.376	627.229	615.554	338.178	303.713	244	524.554	281.465	607.395	417	280.267	290.446
87.3447	387.592	708.029	376.21	614.271	585.408	338.296	289.889	236	510.309	278.605	557.42	414.099	291.395	285.691
87.6658	382.541	705.414	357.459	598.949	549.459	338.541	279.083	228.892	497.134	274.675	520.701	403.892	298.541	281.758
87.9869	372.471	688.274	342.647	584.414	512.411	337.943	270.178	221.882	488.94	269.882	493.057	386.411	299.825	278.06
88.308	360.382	653.879	331.873	575.637	476.745	338.401	261.147	216.745	487.471	265	472.363	366.981	298.019	276.019
88.6291	347.411	602.401	323.274	576.726	447.863	338.506	252.095	211.863	488.083	262	457.589	349.494	292.959	273.822
88.9503	336.733	542.573	316.293	581.975	428	335.611	244.025	208	486.803	260	448.707	337.242	285.733	269.586
89.2714	331.092	484.013	310.312	584.283	415.156	330.248	239.78	203.312	481.971	261.156	448.532	329.283	276.156	264.312
89.5925	329.325	436.554	304.331	575.178	410.166	323.159	238.497	197.497	473.51	264.331	454.338	324.51	262.503	258.166
89.9136	328.576	404.643	299.35	556.073	410	316.876	240.175	192.525	465.949	266.701	460.949	318.774	242.124	251.825
90.2347	324.478	385.35	295.369	530.522	413.631	313.108	242	191.185	461.446	268.739	461.707	310.261	218.261	244.815
90.5559	316.36	375.589	293.194	503.029	416.223	314.36	242.806	193	459.806	269.583	456.446	297.806	196.417	237.612
90.877	304.427	372.478	290	476.592	417.573	318.631	241.796	197.592	457.204	269.815	447.369	283.204	179	228.796
91.1981	291.28	373.959	282.787	453	415.08	325.494	237.787	203.36	448.427	270.853	438.506	268.427	168.427	220.787
91.5192	280.115	377.197	272.777	432	408.771	331.338	231.777	208.108	434.223	270.669	432.662	256	160.669	213
91.8403	270.162	380.631	262	414.767	399.675	333.697	224	211.07	414.767	267.465	428.605	244	153.697	209
92.1615	261.968	381.287	254	401.758	388.822	332	216.242	212.032	395.516	263.242	427.548	233.758	147.484	208.242
92.4826	256.258	379.446	248.252	392.245	376.239	325.748	211.252	210.742	381.245	258.252	428.742	224.748	142.252	211.252
92.8037	252.828	373.904	244	382.955	363.694	316.739	207.783	206.694	373.955	255.261	432.694	216.478	137.261	216.261
93.1248	253.166	365.962	240	372.376	353.376	307.729	207.083	199.647	372.647	254.812	437.917	209.729	134.271	220
93.4459	254.522	357.115	236.44	360.758	346.318	299	207.401	190.159	374.599	257.121	440.879	204.44	132.28	221
93.7671	257.318	352.363	233.841	347.392	343.261	291.71	207.449	181.42	376.551	263.449	439.841	199.71	131.29	220.71
94.0882	259.395	354.108	229.803	333.306	344.204	286.401	206.497	173.701	375.102	273.497	432.803	195	128.299	218.701
94.4093	260.162	365.911	225.764	320.147	346.073	283.147	202.545	168	371.382	285.545	421.764	191	125	216.309
94.7304	260.229	386.134	219.045	309.363	348.363	282.134	195.592	165	365.682	297.911	412.408	187.637	119.681	213.319
95.0515	259.624	412.736	211.344	301.656	348.672	284.72	188.312	161.672	360.344	308.296	408.032	186.984	114.672	210.328
95.3727	256.701	444.236	204.662	299.013	345.325	293.624	182.35	157.662	356.325	316.363	408.974	187.35	111.325	207.662
95.6938	251.124	479.767	201.347	300.694	337.611	309.529	177.388	152.653	352.653	323.124	414.264	187.388	108.653	204.959
96.0149	241.853	518.459	200.713	304.643	325.503	329.72	174.427	148.643	348.287	330.567	422.217	187.07	108.643	203.573
96.336	231.197	556.573	201.099	305.901	311.704	349.873	172.465	145	340.267	337.395	427.803	185.732	110	201.169
96.6571	220.503	587.904	201.127	300.497	298.242	362.987	172.503	143.752	329.873	340.637	427.121	184	112	197.873
96.9783	212.541	608.666	200.156	287.229	286.147	372.064	173.156	144.771	319.073	337.551	418.229	184.615	114	193.615
97.2994	208.185	618.395	197.79	270.605	276.051	383.102	173.185	146.185	309.026	332.713	405.185	184.605	115.605	189.395
97.6205	206.809	616.287	195.809	255.809	266.955	403.102	172.213	148.213	301.382	330.471	392.236	185	115	186.809
97.9416	207.414	605.312	194.414	246.828	259.688	430.478	169.828	149.242	295.758	333.382	380.968	185.414	114.172	183.414
98.2627	208.424	593.478	192.424	242.271	254.459	453.529	166.694	147.847	291.153	339.236	371.93	184.847	112.306	180
98.5839	209.433	597.318	190	238.866	251.834	454.369	164.732	145.866	289.567	344.599	364.93	184.866	110.267	175.567
98.905	210	639.408	188	234.443	250.672	429.787	165.213	142.885	289.557	347.328	358.64	184.885	108.229	171.115
99.2261	208	737.809	187	229	251.095	390.452	166.809	140.452	291.548	346.904	351.879	184.905	106.191	167.643
99.5472	203.538	894.318	187	224.076	249.538	353.694	166.847	139.462	294.076	343.462	341.156	182.924	105.076	165.615
99.8683	198	1085.05	186.943	221.057	246.529	331.599	166.414	139	294.529	337	324.414	180.943	105.529	165.586
100.189	193	1269.22	187.443	221.557	241.038	328.58	164.443	139	292	329.481	301.557	178.481	107.519	166.557
100.511	189.49	1410.66	189.471	224.038	233.019	339.185	161.49	137.49	287.49	322.49	278.076	174.981	108.51	168.529
100.832	187.5	1497	192	228.5	224.5	354.5	158.5	134.5	284	318.5	259.5	171	108.5	172.5

## Sheet: Fig5F
TCS_quantification_plot-profile
Day1									Day1										Day2										Day2										Day3										Day3
Distance	Mock#1	#2	#3	#4	#5	#6	#7		Distance	DEX_#1	#2	#3	#4	#5	#6	#7	#8		Distance	Mock#1	#2	#3	#4	#5	#6	#7	#8		Distance	Dex#1	#2	#3	#4	#5	#6	#7	#8		Distance	Mock#1	#2	#3	#4	#5	#6	#7	#8		Distance
0	0.5	0	0	0	0	0	0		0	0	0	125	0	30	0	77	0		0	0	0	0	0	0	0	0	3		0	52	24.5	81	0	2.5	6	11	59.5		0	0	0	3	0	27	10.5	8	79.5		0
0.32112	0	0	0	32.887	0	0	0		0.32112	33.2705	0	129.729	0	26.5651	1.9863	72.5377	0		0.32112	0	0	0	0	0	0	0	49.161		0.32112	24.4349	30.2055	116.661	0	21.1438	5.53767	0	33.0069		0.32112	10.4281	0	3.02055	0	0	29.6473	25.6747	65.5651		0.32112
0.64224	0	0	3.0411	0	0	16.8836	0		0.64224	0	0	14.6986	0	58.3288	12.0959	46.4795	0.986301		0.64224	0	0	0	0	0	0	0	28.3973		0.64224	54.1644	18.2466	73.3425	0	0	0.506849	0	47.6027		0.64224	0.506849	1.47945	0	1.0137	8.87671	22.8904	31.5342	71.8356		0.64224
0.96336	0	0	0	0	1.53082	0	0		0.96336	0	0	1.46918	0	89.4007	0	66.7979	18.4281		0.96336	13.7123	2.0411	0	0	0	5.87671	0	16.4486		0.96336	26.2842	4.59247	60.7808	0	7.83562	0	0	55.2671		0.96336	0	8.32534	0	20.2466	2.93836	79.5171	76.9726	74.161		0.96336
1.28448	0	0	0	0.0821918	0	0	0		1.28448	86.7397	15.5616	30.226	0	88.1781	23.3425	69.911	8.32192		1.28448	0	0	0	0	0	4.62329	0	26.5205		1.28448	73.6575	9.26712	60.5685	0	0	0	9.24658	84.6986		1.28448	0	133.158	3.40411	8.75342	0	40.9452	114.007	74.5069		1.28448
1.6056	0	0	0	0	0	0	0		1.6056	287.736	0	17.0651	0	56.524	39.113	99.8253	3.10274		1.6056	0	0	0	0	0	0	0	53.2021		1.6056	45.9692	30.3801	37.75	0	3.06849	0	1.03425	90.9658		1.6056	0	37.7226	19.7945	18.8322	0	16.8973	32.9589	18.1062		1.6056
1.92672	0	0.164384	0	0	0	0	0		1.92672	277.671	0	18.274	0	69.7397	0	49.1507	3.35616		1.92672	5.72603	0	0	0	0	6.87671	9.89041	0		1.92672	43.1507	0	16.2055	2.39726	0	45.8082	1.0411	62.7945		1.92672	0	14.8767	0	10.5479	6.23288	21.3562	54.274	40.6986		1.92672
2.24784	0	32.5685	0	0	11.4247	0	0		2.24784	181.87	0	8.38356	0	102.045	8.56849	77.5719	2.95205		2.24784	19.6712	0	0	0	0	0	0	21.4829		2.24784	52.1473	52.5342	37.2021	0	6.66438	15.7089	15.0959	93.8562		2.24784	0	7.33562	20.4692	0	0	34.7569	13.6199	46.9041		2.24784
2.56896	0	0	0	3.89041	0	0	0		2.56896	200.678	0	27.5685	0	132.438	0	178.295	31.3014		2.56896	0	16.0685	68.8356	0	0	2.36301	0	22.1507		2.56896	32.4726	15.637	55.3493	0	11.8151	6.14384	17.5479	24.8151		2.56896	30.7192	47.6644	11.8151	9.61644	0	0.945205	0	36.0069		2.56896
2.89008	0	0	10.024	0	0	0	0		2.89008	54.5274	0	0	0	104.541	0	95.8014	8.59247		2.89008	31.3322	0	0	0	0	29.726	0	10.3219		2.89008	53.6918	7.03767	53.0171	1.87671	35.6164	20.7021	48.9384	22.1747		2.89008	43.6438	17.3596	0	6.09932	20.1712	17.0137	18.4692	55.5822		2.89008
3.2112	0	37.6644	0	0	0	0	0		3.2112	41.3425	0	8.84931	0	43.3151	0	88.411	8.54795		3.2112	4.19178	106.808	32.6849	0	0	2.32877	0	57.411		3.2112	23.8493	12.2192	9.61644	0	35.863	9.32877	14.6575	42.3151		3.2112	29.4247	6.05479	23.4384	7.45205	8.47945	26.5342	14.6575	53.1781		3.2112
3.53232	4.62329	14.2432	0	0	0	0	0		3.53232	0	0	16.1815	13.9795	84.3322	0	98.4212	4.16096		3.53232	21.9041	129.572	38.1747	0	0	15.7842	0	91.4281		3.53232	35.3973	29.1267	10.5377	29.1267	0	20.8493	8.78425	84.4829		3.53232	54.2603	6.98973	12.4829	3.69863	3.7637	48.8938	8.32192	91.7808		3.53232
3.85344	0	0	18.9384	0	0	0	0		3.85344	24.5274	0	8.11644	0	117.178	9.73973	133.233	21.7877		3.85344	18.226	1092.28	69.9178	0	1.62329	0	0	103.288		3.85344	17	52.8562	0	9.73973	49.8836	51.7808	28.4521	53.4384		3.85344	25.774	10.2945	5	20.0205	0	41.6507	19.7055	25.6986		3.85344
4.17456	0	145.233	42.4726	0	0	0	0		4.17456	8.19863	0	0	3.81164	43.9521	12.7534	74.8493	13.7329		4.17456	155.764	1387.2	14.0788	0	0	20.3082	0	58.5822		4.17456	82.2705	24.8116	0	0	65.4349	92.9007	8.19863	127.175		4.17456	37.6644	3.81164	0	5.36644	13.0685	75.1712	23.4658	41.9795		4.17456
4.49568	0	2.73288	16.726	0	0	0.287671	0		4.49568	12.2055	0	16.4795	0	54.4247	6.32877	96.1644	12.6027		4.49568	9.19178	541.808	77.9589	0	4.38356	4.9726	15.8904	131.479		4.49568	61.1781	53.6849	0	57.2329	75.1096	28.6849	20.7945	116.37		4.49568	63.411	7.67123	25.7534	7.12329	3.83562	82.1233	36.1644	63.3288		4.49568
4.8168	0.55137	16.1267	24.0925	0.719178	0	0	0		4.8168	6.96233	0	34.1575	11.0274	104.281	25.1233	74.7842	106.774		4.8168	112.671	107.62	75.3562	0	0	8.58904	0	123.962		4.8168	107.822	46.7089	0	8.07534	79.8151	10.3185	16.1507	68.7295		4.8168	24.0651	4.96233	5.85959	16.1507	4.41096	74.9247	19.8048	64.1507		4.8168
5.13792	0	27.2466	20.5753	1.9726	0	0	0		5.13792	19.5548	0	23.5753	9.79452	117.623	1.10959	48.4315	193.884		5.13792	79.8425	9.34931	60.4726	0	0	28.9932	0	108.171		5.13792	90.0959	40.5411	0	23.9726	83.0959	60.1507	41.8014	69.2808		5.13792	29.4658	13.3151	13.3356	0	40.726	71.137	24.4863	69.4931		5.13792
5.45904	4.41781	29.3596	39.3733	2.61986	0	0	0		5.45904	17.8356	0	57.3253	2.2089	90.3767	1.11644	90.4178	45.0205		5.45904	105.726	10.8151	91.25	0	0	24.4178	6.62671	271.027		5.45904	70.9315	16.024	0	26.5342	164.26	43	34.5069	27.5788		5.45904	7.51027	7.95205	13.2568	7.06849	3.76712	72.6336	27.3904	150.918		5.45904
5.78016	41	52.274	49.9452	8.0137	0	0	0		5.78016	1.68493	0	48.9589	0	82.9315	0	97.9178	20.3151		5.78016	108.425	20.7808	63.4384	0	0	41.7397	21.3425	182.479		5.78016	20.3836	25.3836	0.876712	35.0959	125.795	69.9315	54.7945	11.8356		5.78016	19.1781	0.876712	0.561644	0	13.589	109.315	7.0137	82.3836		5.78016
6.10128	0	0.260274	76.0445	6.2363	13.0856	0	0		6.10128	24.3562	0	13.9589	0	168.897	25.4281	152.904	66.7329		6.10128	130.767	31.6952	62.1712	0	0	19.476	23.0514	175.829		6.10128	75.5685	44.7431	13.0479	67.4281	93.6507	30.6986	1.13014	28.9555		6.10128	20.3425	23.1678	18.6473	0	0	133.349	10.6986	83.5753		6.10128
6.4224	0	1.64384	159.158	12.7534	12.9452	0	0		6.4224	1.70548	6.4726	93.2329	0	83.4726	3.45205	206.726	23.6096		6.4224	68.1986	16.3973	63.0479	0	0	18.1027	20.7055	158.514		6.4224	126.596	37.0411	22.6849	117.589	110.699	62.4247	61.8904	48.4931		6.4224	14.2123	7.76712	13.411	0	0	137.055	64.9247	89.6849		6.4224
6.74352	18.3014	27.8425	163.637	55.3527	3.71575	0	0		6.74352	21.8596	2.99658	35.1507	0.571918	83.6986	5.14726	165.733	19.6952		6.74352	162.038	35.8733	81.3801	0	0	80.6027	34.8596	194.161		6.74352	56.6815	27.274	54.8425	78.8801	143.979	56.5959	0	64.3014		6.74352	30.8562	16.5685	0	0	17.1575	230.767	57.1336	86.1712		6.74352
7.06464	0	0	101.603	29.226	8.63014	0	0		7.06464	0	0	99.4384	5.75342	75.5205	21.6986	154.959	32.411		7.06464	38.8904	17.9863	115.712	0	0	21.2877	11.3699	186.397		7.06464	131.315	68.8767	60.5616	174.836	163.644	45.4384	0	69.1918		7.06464	8.12329	14.4384	51.4931	8.49315	0	220.644	25.1507	49.8219		7.06464
7.38576	0.421233	0	94.3733	43.2979	22.5719	50.6678	0		7.38576	13.5753	12.8938	26.7877	17.363	51.2603	7.52397	119.514	24.887		7.38576	69.8836	45.4178	70.4178	0	0	28.1027	12.1062	233.147		7.38576	290.397	48.0548	31.5788	376.096	390.332	60.6815	16.8493	112.274		7.38576	11.2123	0	4.21233	6.94521	4.36986	147.935	43.4075	105.64		7.38576
7.70688	8.77397	53.2329	97.5205	31.1233	37.8425	57.0685	0		7.70688	21.1507	0	40.9247	23.1438	71.9931	37.2397	90.8425	31.2877		7.70688	72.2603	26.0274	60.5411	0	10.4452	51.7466	1.16438	150.144		7.70688	159.61	50.0274	9.89726	241.24	336.603	81.7603	8.58219	129.863		7.70688	31.6575	35.7466	0	0	17.2055	169.034	12.6986	70.8699		7.70688
8.028	12.8459	22.5993	53.4795	67.8596	36.0377	36.2603	0		8.028	29.5753	0	125.134	93.6884	46.613	25.9555	145.719	4.9726		8.028	106.524	34.8904	67.6575	0	0	68.339	20.5308	209.425		8.028	109.01	48.0993	1.24315	196.223	195.647	84.1884	34.9349	189.87		8.028	36.6301	9.9726	9.11644	0	7.38699	145.164	12.4144	67.5137		8.028
8.34912	7.65753	98.0205	16.4384	51.226	28.7945	34.4178	0		8.34912	9.89041	0	122.479	17.7671	64.3562	17.9589	151.301	15.9041		8.34912	93.9178	47.7945	44.7123	0	7.65753	83.2877	16.8493	206.26		8.34912	178.575	77.3973	1.23288	100.37	263.986	67.9178	9.42466	172.479		8.34912	14.2329	30.9726	5.82192	11.1918	99.4521	284.164	74.3973	87.5753		8.34912
8.67024	20.1096	28.3288	63.8836	59.9897	81.0582	32.6712	0		8.67024	10.2226	9.33219	220.36	55	109	51.5548	128.476	23.4795		8.67024	68.0342	7.70205	50.8527	0	0	50.8151	18.3664	138.846		8.67024	178.781	93.9589	23.2295	113.253	253.188	84.4486	81.6986	180.623		8.67024	68.9555	54.1027	54.0788	4.48288	24.7774	142.897	42.1438	111.658		8.67024
8.99136	0	72.8082	45.0822	21.3836	49.4863	34.8493	0		8.99136	47.226	9.69863	212.705	123.329	165.356	44.1438	142.568	31.9521		8.99136	144.151	45.1712	41.5205	0	12.5342	74.8151	35.6575	122.007		8.99136	184.822	115.795	19.8904	84.9384	388.623	38.5069	35.7877	211.884		8.99136	21.0137	11.726	17.5685	0	78.2671	233.288	109.466	122.582		8.99136
9.31248	13.1849	30.4897	75.339	45.1438	32.3801	8.2774	0		9.31248	57.5993	0.80137	260.613	109.021	72.2363	13.2123	167.962	16.1849		9.31248	244.315	39.2055	65.6541	0	0	19.6336	65.161	194.394		9.31248	104.815	58.6336	1.60274	70.589	290.558	54.2021	67.6507	235.161		9.31248	58.5959	30.4521	7.60616	13.1849	25.3801	171.37	49.2842	105.175		9.31248
9.6336	5.56164	123.164	212.712	86.8356	64.2603	25.3836	0		9.6336	142.986	10.726	181.027	96.4931	105.411	68.4521	256.466	142.342		9.6336	215.233	58.4658	82.4658	0	0	45.3288	76.4658	140.822		9.6336	108.055	56.274	17.4795	82.3973	154.479	53.6438	144.055	200.452		9.6336	65.1644	15.6438	26.5205	0	53.9452	197.219	0	91.3288		9.6336
9.95472	17.7226	97.5411	198.438	58.6199	3.54452	4.24658	0		9.95472	45.3596	14.2397	220.692	199.654	77.2637	10.2397	336.514	118.973		9.95472	276.849	9.96918	64.3973	0	0	27.7534	41.3664	168.839		9.95472	157.147	101.092	66.2466	157.634	125.514	52.363	125.75	235.767		9.95472	65.7295	26.0651	16.7842	0	96.0514	147.894	40.4281	48.726		9.95472
10.2758	3.90411	92.274	246.397	86.5753	30.6781	0.767123	0		10.2758	75.2877	33.9658	343.678	193.596	92.8219	20.9726	200.637	94.4589		10.2758	396.349	9.75342	31.089	16.4589	19.5068	84.4795	54.6644	160.589		10.2758	242.76	101.747	80.7603	114	151.719	55.3904	181.973	282.849		10.2758	44.0205	33.3973	122.527	9.75342	60.7808	129.281	56.8151	34.7808		10.2758
10.597	0	199.517	242.613	76.1747	30.0308	97.7158	0		10.597	40.2295	29.8322	361.209	162.408	61.8116	54.1644	327.777	86.7979		10.597	296.774	52.4486	49.7466	0	0	36.3904	105.616	265.976		10.597	181.747	158.212	40.4555	123.034	192.908	32.4829	300.503	363.24		10.597	43.8699	5.41781	168.401	13.6781	94.2569	110.257	0	75.1062		10.597
10.9181	18.0685	230.363	172.123	20.8836	32.6986	52.5274	0		10.9181	24.6849	48.9041	460.178	192.082	71.5069	98.3562	281.082	91.8904		10.9181	329.753	23.1781	60.0411	0.383562	8.82192	62.5753	121.233	202.068		10.9181	199.89	215.205	65.3562	186.795	148.233	59.9041	260.205	223.205		10.9181	44.3699	40.8356	76.8356	46.0274	83.1096	75.7534	15.3425	199.795		10.9181
11.2392	22.8664	155.164	234.599	20.5925	65.5377	1.31849	0		11.2392	22.9007	80.1884	341.644	232.284	32.2637	27.9349	314.562	111.387		11.2392	355.267	84.6952	72.9007	0	1.85959	31.4966	93.1233	199.818		11.2392	165.318	165.976	43.7192	197.918	249.969	54.2808	217.634	249.695		11.2392	59.2466	37.4623	214.455	0	42.8185	92.661	17.4795	73.661		11.2392
11.5603	4.14384	196.507	294.925	65.2877	74.226	31.6849	0		11.5603	28.6644	44.5479	259.788	265.349	119.747	20.9726	280.582	140.171		11.5603	288.363	87.5685	16.8836	0	1.86986	22.0137	56.9178	152.801		11.5603	140.274	258.938	39.4795	144.685	182.459	120.068	264.63	292.774		11.5603	125.884	34.5959	269.993	11.8425	36.4658	85.5342	1.50685	110.144		11.5603
11.8814	7.46575	102.366	244.072	80.3664	88.9075	68.9726	0		11.8814	33.5856	13.1336	212.997	229.592	66.1199	1.49315	547.815	188.788		11.8814	127.024	129.952	24.7329	6.89384	3.76027	38.9863	59.0959	276.086		11.8814	239.164	300.616	76.5719	310.997	183.654	97.8733	246.945	317.188		11.8814	80.5479	28.3699	397.688	26.1473	77.4555	98.411	0	156.825		11.8814
12.2026	29.4384	161.082	252.959	108.849	68.589	42.5685	0		12.2026	69.2603	14.2877	238.589	230.973	54.3699	11.2192	492.479	123.658		12.2026	226.685	118.425	20.8493	28.1096	13.4795	50.8767	51.0411	238.493		12.2026	168.027	378.685	57.3699	240.247	213.26	80.589	361.699	517.726		12.2026	71.3425	79.1233	365.877	10.0822	90.6849	276.301	0	108.644		12.2026
12.5237	18.3733	173.318	347.024	119.445	50.5034	46.3459	0		12.5237	65.3904	9.89384	211.702	347.384	175.062	21.9007	599.873	152.565		12.5237	211.918	136.075	50.7705	0	17.1062	40.7877	56.1541	310.757		12.5237	367.062	247.397	24.2363	373.356	267.664	93.7637	488.462	267.942		12.5237	33.887	88.3733	217.925	14.5651	45	245.949	2.26712	136.675		12.5237
12.8448	15.0822	95.9315	516.5	94.2329	77.2192	35.6438	0		12.8448	85.3562	52.3699	180.651	408.911	298.87	25.1027	387.616	189.116		12.8448	181.747	116.705	71.1438	9.91096	35.5342	19.7192	33.0685	388.027		12.8448	431.63	356.445	31.9247	301.055	289.158	85.1644	570.788	292.418		12.8448	52.5342	158.466	290.521	62.2192	61.1986	225.562	52.7329	160.336		12.8448
13.1659	19.3938	133.329	420.158	105.75	71.4247	152	0		13.1659	136.685	13.5514	197.418	316.623	345.271	43.9897	437.592	336.401		13.1659	288.099	218.253	58.4041	55.2226	42.6644	53.5069	52.4623	379.705		13.1659	700.877	285.445	40.7397	476.699	395.445	37.5753	679.058	441.918		13.1659	70.7397	69.4041	251.188	35.7192	29.9315	255.079	20.3699	208.795		13.1659
13.487	66.7534	158.808	327.986	103.082	78.8767	79.4247	0		13.487	193.479	12.137	243.041	251.74	227.233	75.3973	422.918	171.904		13.487	393.384	225.986	33.4521	0	40.9041	19.0274	169.863	299.452		13.487	884.575	446.11	23.6986	314.753	288.753	110.288	555.206	574.342		13.487	95.0274	59.1507	192.37	29.4384	31.3288	237.315	6.43836	188.63		13.487
13.8082	18.476	153.979	299.562	52.8596	111.134	68.8219	0		13.8082	233.363	67.2329	240.476	261.466	177.271	12.5308	457.442	249.795		13.8082	463.099	241.13	43.8836	31.7021	52.0651	44.0616	143.661	288.13		13.8082	892.62	563.75	32.8219	253.986	277.986	65.9384	389.949	609.473		13.8082	151.733	81.5308	228.113	22.7705	176.264	261.418	30.5856	208.425		13.8082
14.1293	31.637	97.6849	285.527	90.411	50.8082	116.164	0		14.1293	293.568	26.7671	207.322	237.007	269.692	40.9247	466.041	209.151		14.1293	630	186.137	122.151	22.774	74.8288	29.2192	142.514	286.082		14.1293	710.116	573.945	7.80822	305.377	321.349	69.2055	245.849	632.589		14.1293	119.555	47.7808	289.199	58.9384	129.87	252.849	11.0616	89.6644		14.1293
14.4504	32.6027	155.432	297.202	39.8425	83.5788	117.171	0		14.4504	167.911	53.5205	399.86	229.774	198.099	80.3527	478.568	238.812		14.4504	447.236	218.092	87.1062	55.2192	49.25	40.363	198.103	221.01		14.4504	752.616	526.11	35.8425	339.634	277.113	103.863	300.712	618.897		14.4504	115.668	53.6233	346.048	57.1438	74.3527	261.339	17.9555	84.9349		14.4504
14.7715	97.274	143.514	521.493	156.692	65.1781	128.582	0		14.7715	151.507	75.6164	206.438	129.932	253.507	83.5479	491.863	309.89		14.7715	698.863	245.11	66.9726	43.7945	44.7123	76.3014	225.384	451.548		14.7715	803.726	573.233	28.5342	279.658	331.63	144.137	363.11	809.836		14.7715	113.808	43.137	548.753	89.7123	68.2055	389.274	6.16438	113.521		14.7715
15.0926	59.1678	205.332	655.154	117.839	106.161	92.8253	0		15.0926	187.5	66.2192	186.408	171.586	173.678	81.363	342.914	276.716		15.0926	872.921	164.205	8.13699	47.2534	16.613	67.5582	304.38	536.072		15.0926	947.325	715.404	57.5274	355.904	351.168	160.322	635.39	721.384		15.0926	88.3596	30.2226	547.075	86.8664	71.8356	469.986	13.1541	127.575		15.0926
15.4138	36.4658	344.562	714.233	246.301	71.411	55.0959	0		15.4138	106.514	78.9589	314.966	255.315	278.014	156.349	578.233	359.014		15.4138	494.527	212.568	25.6849	70.6781	39.274	189.068	413.822	496.397		15.4138	1072	942.137	79.1918	288.973	261.459	331.808	513.575	538.986		15.4138	83.2808	34.2603	435.527	149.966	116.849	354.281	11	67.411		15.4138
15.7349	109.021	201.452	849.339	93.4486	81.6199	163.901	7.16096		15.7349	142.842	71.8699	255.291	207.336	277.801	137.74	495.517	258.791		15.7349	482.233	121.675	60.3425	34.6884	47.6473	230.435	270.257	415.668		15.7349	951.233	937.113	82.6336	230.712	490.072	226.452	514.781	522.682		15.7349	74.5479	60.0616	475	70.3459	58.9795	350.003	34.024	128.541		15.7349
16.056	98.3562	170.904	668.397	125.363	92.4658	191.877	0		16.056	241.027	115.26	298.411	273.932	211.164	139.014	473.808	251.014		16.056	442.37	106.644	17.9452	61.4384	12.0822	155.603	209.452	507.205		16.056	956.904	1179.05	111.575	298.699	402.918	289.726	329.411	609.877		16.056	56.1644	58	483.74	67.9041	209.767	455.781	30.4247	94.1507		16.056
16.3771	120.288	112.856	698.815	97.3493	109.271	262.318	1.57192		16.3771	197.716	61.6404	302.603	404.394	178.986	66.1336	476.459	234.527		16.3771	453.548	212.702	27.8425	11.8801	60.1541	231.709	230.154	513.421		16.3771	792.178	879.706	143.921	474.267	380.976	334.545	373.202	557.068		16.3771	45.2055	80.5685	549.493	77.7226	147.158	384.182	31.6027	143.798		16.3771
16.6982	186.425	130.918	691.706	140.164	181.26	224.342	0		16.6982	284.315	104.596	320.726	299.466	177.055	112.13	637.534	182.253		16.6982	369.116	148.589	61.774	26.0205	57.637	306.788	201.514	519.514		16.6982	743.548	931.685	226.671	432.986	512.966	264.808	559.212	608.932		16.6982	116.178	97.6233	473.973	105.123	166.034	342.753	0	195.096		16.6982
17.0194	263.805	173.747	529.116	115.911	98.089	201.038	19.4212		17.0194	315.733	66.1541	261.555	458.39	168.205	149.377	552.986	230.901		17.0194	422.247	226.702	77.0651	55.6815	42.8014	210.428	222.229	703.171		17.0194	966.993	894.596	307.021	337.021	593.432	407.377	670.702	814.976		17.0194	140.384	129.884	473.281	85.0753	162.986	308.171	55.1267	251.815		17.0194
17.3405	366.945	148.767	533.89	134.315	169.712	125.534	0.184932		17.3405	364.205	137.795	272.452	333.356	248.055	115.37	814.767	220.877		17.3405	431.178	389.151	93.6712	22.0411	157.959	266.603	235.479	694.384		17.3405	1254.78	823.521	320.247	364.575	706.096	253.562	667.123	1798.97		17.3405	226.712	159.178	664.822	76.6301	143.562	471.438	8.90411	191.288		17.3405
17.6616	468.428	162.164	587.312	154.541	207.541	136.493	0		17.6616	276.832	234.873	404.531	546.445	239.175	117.764	1237.58	351.781		17.6616	609.723	233.89	119.884	48.7671	24.3767	244.812	258.979	519.257		17.6616	1259.37	714.13	368.921	370.51	760.729	333.027	528.74	1767.51		17.6616	243.654	98.4931	521.366	134.483	143.312	505.288	72.1575	150.712		17.6616
17.9827	687.863	114.822	417.644	56.4795	290.932	90.7123	38.5753		17.9827	265.747	307.74	409.336	370.007	251.438	128.719	1149.88	366.993		17.9827	738.575	224.205	159.973	37.1438	48.4658	416.548	349.267	484.014		17.9827	1092.27	688.959	626.575	553.329	782.836	542.76	746.514	1346.68		17.9827	108.247	115.856	500.726	325.925	121.651	463.658	2.77397	159.13		17.9827
18.3038	685.236	156.88	525.764	183.26	182.045	106.168	35.6644		18.3038	250.507	201.791	357.825	283.801	223.277	140.935	826.13	316.134		18.3038	557.952	234.5	211.774	44.5137	49.0856	288.086	347.709	365.168		18.3038	940.058	802.39	315.007	474.89	856.322	786.603	1032.26	1061.5		18.3038	94.5342	158.586	457.247	220.212	112.973	579.723	18.5925	182.836		18.3038
18.625	557.877	216.986	625.452	151.904	376.219	103.404	116.993		18.625	246.753	210.068	339.151	289.178	184.699	279.63	872.11	328.822		18.625	508.205	312.151	305.986	36.8219	91.7808	341.849	276.479	431.671		18.625	1064.71	772.767	162.164	466.452	826.753	776.753	1221.3	852.479		18.625	129.863	93.4384	435.521	110.288	168.918	510.548	34.7671	284.466		18.625
18.9461	384.678	148.11	517.928	221.815	518.729	68.1027	39.4041		18.9461	198.61	246.716	346.123	560.832	348.288	196.408	812.514	404.781		18.9461	514.699	354.301	236.616	61.5959	92.1027	302.027	414.493	424.373		18.9461	851.01	781.315	199.829	708.658	907.911	505.462	657.483	679.363		18.9461	141.914	96.5925	525.767	97.7911	161.209	533.764	26.1301	168.476		18.9461
19.2672	328.911	120.685	725.068	258.123	661.164	122.932	21.6986		19.2672	212.548	386.863	254.466	480.192	288.356	114.63	1061.99	447.753		19.2672	639.164	368.548	358.801	17.1233	85.7945	280.986	405.541	443.185		19.2672	886.39	966.658	146.247	1015.5	966.973	403.507	709.603	757.329		19.2672	234.897	71.4863	523.774	99.8699	327.014	542.678	36.9863	207.363		19.2672
19.5883	396.103	183.062	628.692	234.137	450.209	119.134	175.291		19.5883	169.921	378.182	227.089	448.973	311.14	164.315	1103.59	371.253		19.5883	615.901	503.318	354.712	113.586	53.6712	230.14	474.034	524.161		19.5883	1039.83	1197.24	260.966	1233.87	852.435	458.866	950.757	824.709		19.5883	288.901	57.0137	652.065	90.7055	278.908	440.962	0	202.969		19.5883
19.9094	535.767	279.027	675.123	322.747	477	124.308	20.4863		19.9094	343	352.986	274.493	365.562	245.205	154.726	1644.19	296.808		19.9094	693.027	440.603	274.534	100.397	56.2329	242.068	402.068	438.247		19.9094	1114.34	917.753	344.726	1129.29	864.822	741	881.603	622.562		19.9094	327	139.644	549.068	82.3151	267.548	468.507	63.8767	240.041		19.9094
20.2306	426.421	260.901	672.901	311.548	423.795	154.606	81.8425		20.2306	436.318	378.312	233.897	297.863	187.072	146.966	1655.43	294.623		20.2306	816.685	530.863	388.86	50.6507	44.7911	362.168	403.106	568.825		20.2306	1268.47	835.185	291.195	957.185	808.918	642.493	837.805	875.949		20.2306	299.185	163.743	705.298	132.116	202.688	435.969	15.0205	166.182		20.2306
20.5517	481.007	275.466	573.123	452.274	403.849	235.247	103.89		20.5517	384.473	276.041	204.507	323.473	292.144	137.473	1292.57	437.411		20.5517	722.26	606.315	338.144	67.2055	90.2603	413.774	374.233	521.473		20.5517	1300.74	792.411	331.562	1239.08	708.158	467.822	1094.33	940.794		20.5517	284.082	129.267	537.418	179.322	319.356	502.11	15.1986	204.623		20.5517
20.8728	590.387	287.086	425.007	544.589	450.856	306.493	78.8904		20.8728	374.205	379.199	330	336.092	466.863	183.466	1299.83	414.178		20.8728	819.986	476.229	371.51	39.1541	160.452	360.404	491.257	677.322		20.8728	1161.7	932.25	273.89	1366.62	763.384	435.914	915.781	1148.89		20.8728	307.904	163.305	807.767	229.829	282.586	537.921	37.1233	195.753		20.8728
21.1939	596.849	226.685	390.822	571.212	464.014	250.918	71.9931		21.1939	425.562	347.37	405.26	668.986	470.411	396.425	1424.04	510.37		21.1939	581.616	481.342	195.11	62.3014	142.904	370.151	501.301	1116.16		21.1939	958.37	1137.04	371.603	1086.29	730.521	519.575	1143.15	1714.04		21.1939	337.466	110.959	472.055	160.726	272.918	528.726	34.9452	145.918		21.1939
21.515	779.062	215.123	398.774	695.822	521.976	235.36	82.2637		21.515	585.257	238.822	453.034	865.219	449.997	588.387	1714.11	815.257		21.515	722.086	498.202	264.541	33.1027	133.462	383.945	407.363	1091.21		21.515	1005.62	1222.26	381.969	959.637	1012.89	491.247	1246.7	1793.9		21.515	352.675	119.555	502.997	184.161	222.507	782.339	48.7431	169.63		21.515
21.8362	717.726	246.425	375.418	454.356	476.041	368.836	59.6712		21.8362	605.582	389.658	740.794	678.733	432.384	289.26	1700.31	685.164		21.8362	871.521	576.815	148.048	48.411	145.315	303.418	756.904	877.007		21.8362	1429.4	1257.93	671.39	1115.36	897.5	450.986	1463.13	1763.45		21.8362	277.171	100.281	475.932	211.884	209.288	973.486	60.2397	170.856		21.8362
22.1573	711.723	442.38	272.329	406.363	672.356	333.555	41.0925		22.1573	900.325	402.295	760.592	734.294	410.394	420.548	1696.82	743.137		22.1573	787.473	377.966	223.014	32.274	159.747	403.161	837.592	741.195		22.1573	1597.25	1509.8	581.438	1014.21	904.524	417.113	1695.16	1827.57		22.1573	410.565	202.771	523.575	187.079	262.973	638.654	44.9555	294.226		22.1573
22.4784	752.836	568.822	429.027	398.185	425.616	306.767	9.15069		22.4784	697.082	472.397	743.082	437.589	465.438	764.384	1660.66	823.904		22.4784	627.877	467.795	185.644	53.0274	131.918	364.315	797.794	824.74		22.4784	1227.15	1454.42	787.918	920.178	939.37	599.726	1646.79	1316.48		22.4784	328.932	157.26	395.671	156.959	213.877	710.959	14.589	229.671		22.4784
22.7995	673.226	417.901	428.418	471.082	564.26	415.873	43.1027		22.7995	608.517	481.942	592.527	800.87	335.127	561.219	1526.89	1610.1		22.7995	624.808	411.113	215.103	42.0925	173.079	384.363	882.247	818.949		22.7995	1096.26	1103.03	665.486	893.003	912.301	840.661	1637.83	1367.61		22.7995	347.199	104.962	671.401	182.695	319.048	868.233	15.2842	263.788		22.7995
23.1206	650.452	374.301	560.884	410.479	643.521	670.055	208.986		23.1206	766.863	530.514	643.315	807.925	378.103	482.089	1312.36	1288.48		23.1206	543.884	483.644	254.562	72.9589	177.308	358.274	621.473	762.438		23.1206	859.034	1125.66	458.63	961.794	937.411	774.788	2157.49	1328.92		23.1206	388.466	123.534	464.733	156.932	275.253	848.452	22.0685	479.575		23.1206
23.4418	571	300.75	518	422.5	616.75	780.25	20.25		23.4418	694.25	703	739.25	814.75	571.25	409.25	1853.25	1942.25		23.4418	478	707.5	261.75	172	160.25	528.75	496	1178		23.4418	1054.75	1199.5	426.5	897.25	755.25	792.25	2222.25	1178.5		23.4418	318.5	151.5	619	267.75	222.5	999	81.25	412.75		23.4418
23.7629	464.973	387.767	469.945	387.151	591.11	686.562	65.2123		23.7629	713.397	603.178	663.767	597.055	628.548	428.822	1814.34	1280.45		23.7629	608.712	683.014	368.685	77.9726	246.726	551.794	592.863	1070.05		23.7629	1050.75	1261.23	624.288	798.534	694.233	1134.88	2057.95	1891.37		23.7629	277.89	230.644	456.164	235.027	262.041	1180.81	52.5479	386.822		23.7629
24.084	463.062	311.801	489.589	431.836	710.76	646.123	104.404		24.084	554.312	774.456	928.079	490.271	679.544	960.086	1632.57	1376.88		24.084	635.921	560.051	650.884	90.7877	313.839	514.87	814.716	1065.88		24.084	1172.42	1214.34	972.579	907.421	902.322	1042.32	1704.34	2148.87		24.084	308.082	157.082	539.233	257.332	373.226	838.356	72.2637	288.805		24.084
24.4051	609.226	521.822	401.836	489.315	692.027	508.712	31.0548		24.4051	581	695.425	909.706	545.24	450.63	726.562	1692.36	1453.48		24.4051	753.678	895.712	642.479	40.5205	420.897	642.384	717.048	1297.92		24.4051	1031.49	1451.92	814.438	863.178	910.192	1181.23	2031.84	1706.78		24.4051	453.158	185.555	432.103	379.185	278.541	832.651	48.137	454.637		24.4051
24.7262	628.308	318.651	529.582	483.921	510.733	995.733	140.144		24.7262	656.877	583.894	942.51	707.442	494.541	567.531	1850.4	1497.21		24.7262	732.24	854.945	913.736	213.592	388.507	827.236	908.976	1664.89		24.7262	862.709	1272.46	730.969	952.856	825.223	1214.1	2401.83	2094.53		24.7262	419.017	238.784	464.945	234.64	328.568	824.038	80.4178	381.373		24.7262
25.0474	701.233	290.89	664.452	599.938	1028.77	951.993	101.103		25.0474	846.068	559.959	781.356	880.301	466.986	526.808	1912.73	1360.93		25.0474	588.137	908.671	733.836	39.0411	416.178	1053.55	832.274	1702.84		25.0474	960.89	1395.6	1200.93	1069.79	896.685	903.548	2331.45	1895.63		25.0474	473.658	324.877	659.329	264.904	319.123	838.877	141.384	308.411		25.0474
25.3685	705.01	377.729	719.671	742.825	1073.64	649.589	92.1404		25.3685	759.685	621.688	894.661	775.154	488.695	602.414	1633.01	1239.06		25.3685	626.092	615.192	649.904	93.137	448.291	758.743	1012.36	1415.15		25.3685	1381.54	1503.27	1443.79	998.233	958.531	866.021	1765.44	1984.58		25.3685	302.164	242.589	530.062	201.586	314.291	881.034	146.904	360.884		25.3685
25.6896	853.24	381.986	746.76	968.151	817.336	560.151	63.4384		25.6896	619.89	827.315	1099.88	966.308	512.206	560.514	1887.14	1080.9		25.6896	731.158	815.473	552.651	1.13014	442.068	1217.71	1087.25	1293.58		25.6896	2230.34	1651.84	1608.6	1088.51	1072.89	874.822	1723.58	1846.56		25.6896	330.363	292.644	596.986	226.267	273.87	889.726	304.808	388.952		25.6896
26.0107	1020.29	346.493	550.538	669.366	789.575	589.544	82.8253		26.0107	1163.75	692.175	936.976	675.87	658.716	576.853	3098.46	1067.27		26.0107	731.075	771.462	528.01	53.774	572.438	947.14	965.62	1445.68		26.0107	2082.16	1524.24	1463.03	907.209	1205.54	982.538	1679.56	1783.73		26.0107	614.911	338.39	680.544	264.788	361.116	769.699	142.87	288.147		26.0107
26.3318	1225.74	512.329	613.233	507.897	900.206	447.13	160.637		26.3318	1483.48	627.493	877.863	861.836	657.384	559.438	3256.92	1437.64		26.3318	1014.16	656.301	507.164	69.4931	480.479	885.425	844.575	1335.52		26.3318	2109.9	1885.49	1597.75	888.973	1012.27	855.973	1920.64	1624.23		26.3318	465.726	272.315	764.315	265.945	389.877	685.37	91.0822	345.616		26.3318
26.653	1115.49	527.87	733.798	569.497	898.572	645.384	155.603		26.653	1274.12	527.315	1043.88	1109.38	988.329	661.661	3049.27	1623.03		26.653	1118.11	586.736	599.325	159.26	682.531	844.945	706.976	1172.01		26.653	1804.46	2005.09	1456.73	1462.45	1144.38	918.168	1732.78	1796.91		26.653	539.274	230.048	661.654	268.866	434.774	764.37	164.298	504.702		26.653
26.9741	1084.47	423.986	812.329	463.671	922.822	840.548	110.301		26.9741	1265.98	559.486	940.986	964.507	980.473	807.479	2388.66	1657.66		26.9741	1423.7	605.294	669.911	132.603	515.041	1022.62	621.678	1356.29		26.9741	1433.54	1927.28	1231.42	1617.41	1195.37	898.315	1617.73	1896.97		26.9741	458	352.842	587.993	211.226	522.219	681.171	218.151	455.432		26.9741
27.2952	1140.53	353.685	720.466	687.435	1066.62	629.606	128.911		27.2952	1212.28	662.49	880.459	991.644	873.363	1236.13	2445.99	1338.18		27.2952	1747.98	790.271	544.171	76.2808	574.887	1101.62	907.12	1411.51		27.2952	1326.91	2430.84	1329.59	1938.04	1543.66	980.277	1267.62	1928.13		27.2952	572.88	315.795	616.565	151.938	460.88	799.051	203.055	505.911		27.2952
27.6163	976.384	557.644	795.397	499.39	928.658	706.329	166.904		27.6163	1445.53	702.397	830.959	971.219	759.685	1182.75	2361.81	1212.99		27.6163	1954.23	821.301	952.274	203.63	503.575	1023.6	649.041	1776.96		27.6163	2190.67	2508.84	1267.08	1703.97	1451.75	950.329	2001.7	2276.36		27.6163	574.301	229.192	592.548	198.466	549.068	778.219	158.808	551.082		27.6163
27.9374	1031.22	563.144	703.288	523.901	905.329	853.949	219.024		27.9374	1539.68	575.267	914.918	1143.21	777.014	1008.11	2718.27	1545.73		27.9374	1870.26	1106.32	1024.51	376.462	506.116	770.695	635.521	2067.43		27.9374	2528.89	2204.38	1623.98	1225.55	1732.21	1082.72	2106.63	2560.71		27.9374	627.565	320.339	787.579	170.233	468.983	986.137	178.767	550.842		27.9374
28.2586	963.267	484.877	800.801	564.973	973.849	1228.36	251.986		28.2586	1702.96	807.11	1236.79	1610.49	972.034	1065.71	2613.56	1569.98		28.2586	1404.56	1320.39	1088.18	256.856	428.603	1012.86	876.473	1610.01		28.2586	2136.32	2526.84	1533.62	1472.17	1739.88	997.253	1404.27	2530.47		28.2586	583.233	330.671	890.199	293.685	504.719	841.603	153.226	618.363		28.2586
28.5797	824.459	440.829	717.729	841.404	1715.08	1294.28	219.476		28.5797	1691.14	808.743	1115.39	1536.87	1277.29	970.76	2487.91	1399.78		28.5797	1397	1009.6	1138.7	178.705	534.527	1430.55	791.63	1374.19		28.5797	1806.44	2611.36	1500.42	1877.75	1547.9	1093.81	1877.24	2564.42		28.5797	642.11	227.74	951.695	313.062	633.007	877.158	290.373	583.158		28.5797
28.9008	997.493	316.068	527.685	891.445	1439.36	1325.73	172.274		28.9008	2425.15	685.11	1070.82	1213.16	1061.63	1144.79	2782.9	1771.47		28.9008	1314.48	1170.37	1547.75	128.288	547.671	1638.08	837.397	1710.18		28.9008	1868.92	2189.04	1673.85	2020.22	1118.36	1547.64	2020.38	2923.32		28.9008	756.959	355.63	1026.25	247.342	550.123	961.411	309.425	656.082		28.9008
29.2219	1720	417.856	535.723	897.538	993.188	1521.32	211.459		29.2219	2460.05	616.942	1162.14	1474.97	1174.62	972.397	3804.97	1843		29.2219	1464.52	1274.01	1257.78	135.521	567.432	1197.46	928.74	2154.34		29.2219	1955.67	1681.87	2005.97	2379.64	1245.94	1617.87	2008.01	2487.83		29.2219	721.408	329.49	1081.01	277.421	603.106	1035.17	302.096	649.092		29.2219
29.543	1332.51	398.699	661.911	774.63	1177.49	1277.42	284.397		29.543	1920.32	676.623	914.555	1290.79	939.897	1140.51	3622.74	2015.98		29.543	2176.38	1490.58	1284.34	161.788	690.979	1420.3	1189.43	1935.28		29.543	1788.71	1788.19	2275.46	2006.42	1738.23	1378.65	2273.77	2364.71		29.543	782.781	399.123	1053.98	282.034	835.144	1376.49	229.397	579.61		29.543
29.8642	936.469	489.942	665.938	653.914	1229.25	1653.57	269.092		29.8642	1916.15	846.445	1140.61	1258.43	1079.92	1209	2989.42	2008.06		29.8642	1658.75	1465.48	953.599	125.99	915.154	976.62	1204.26	1841.5		29.8642	1984.91	2127.11	2124.65	1775.73	1286.75	1227.13	2811.17	2433.59		29.8642	662.986	361.257	1126.58	263.997	456.356	989.818	224.202	692.271		29.8642
30.1853	1182.68	394.171	1030.23	787.884	1193.44	1758.36	259.582		30.1853	1867.12	931.027	1073.7	1397.85	925.466	1474.48	3028.25	2430.64		30.1853	1553.93	1387.89	1064.78	158.274	995.959	1085.75	1223.78	2087.12		30.1853	1897.04	2450.08	1948.97	1738.12	1443.49	1066.15	2275.62	2929.58		30.1853	765.521	416.288	1154.22	367.247	591.877	1170.52	166.986	624.74		30.1853
30.5064	1163.08	492.373	966.449	1105.57	1173.42	1558.37	251.76		30.5064	1666.86	956.065	1032.57	1689.09	1631.42	1347.57	2998.83	2050.77		30.5064	1553.33	1111.62	1536.98	335.449	802.962	1045.37	966.5	2031.14		30.5064	2259.61	2670.61	1663.01	1540.86	1854.43	1220.48	2632.95	3187.19		30.5064	578.798	543.342	1727.9	569.911	475.082	1336.1	205.497	781.192		30.5064
30.8275	1021.55	404.562	843.753	1061.11	1133.47	1269.04	495.644		30.8275	1337.94	1190.49	1478.54	1549.1	1345.38	1256.16	2922.23	2237.08		30.8275	1821.23	1362.18	755.055	205.514	784.007	1409.22	825.596	2339.27		30.8275	2112.84	1878.12	1453.25	1769.75	2047.03	1232.08	2267.88	3000.18		30.8275	682.082	441.692	1606.52	490.61	578.445	1385.66	224.5	1068.2		30.8275
31.1486	898.952	481.236	566.729	874.363	1350.83	1169.95	495.12		31.1486	1564.01	1079.79	1273.65	1801.49	1301.4	1281.92	2864.22	1877.49		31.1486	2313.15	1501.14	1213.11	326.229	875.113	1566.04	873.706	2116.65		31.1486	2796.27	1703.42	1392.02	2328.47	2462.5	1550.2	1793.76	2704.35		31.1486	777.192	387.182	1731.84	708.747	415.678	2042.13	307.257	1264.82		31.1486
31.4698	896.014	487.623	527.973	918.829	1285.45	1419.15	497.247		31.4698	1501.08	1080.64	1329.18	1467.1	1672.3	1434.19	3110.55	1852.77		31.4698	2476.19	1558.49	1249.89	411.699	1395.21	1245.3	808.233	2218.26		31.4698	3859.4	1666.71	1199.42	1830.47	2821.68	1390.88	2333.37	2727.38		31.4698	718.274	523.562	1717.86	637.603	469.055	2780	208.74	988.315		31.4698
31.7909	1316.75	620.695	633.445	742.747	1402.19	1201.83	628.134		31.7909	1627.24	1052.08	1135.25	1859.94	1516.72	1363.08	2284.99	2201.38		31.7909	2475.15	1871.02	1388.03	366.76	1648.3	1304.43	856.627	2460.5		31.7909	3389.93	2093.51	1315.98	1739.2	2736.87	1787.03	2238.37	2618.74		31.7909	849.37	342.928	1320.5	592.014	648.812	1839.95	220.955	696.634		31.7909
32.112	1298.15	684.63	917.336	769.973	1343.23	1213	514.575		32.112	1765.54	1347.81	1434.05	2247.51	1422.8	1341.01	2454.53	2728.68		32.112	2563.92	1692.38	1526.14	428.322	1942.92	1249.03	896.438	2339.93		32.112	4095	2546.79	1093.59	1959.53	2643.71	1753.41	1809.85	2342.27		32.112	1680.51	397.253	1301.58	589.541	780.774	1826.31	295.733	733.171		32.112
32.4331	1725.79	689.788	987.75	1020.12	1320.16	1617.46	451.966		32.4331	1452.83	1030.7	1466.07	2236.73	1199.24	1475.56	2842.45	2712.79		32.4331	2924.43	1523.71	1851.44	463.164	2115.86	1708.25	1225.34	2742.31		32.4331	3566.89	2423.41	1172.62	1699.39	2226.84	1497.32	2049.71	2723.37		32.4331	1296.98	439.476	1373.64	723.127	701.702	1720.24	204.87	868.247		32.4331
32.7542	2216.7	677.158	830.767	966.445	1098.73	2013.03	222.788		32.7542	1463.4	1006.4	1222.71	2075.58	1292.95	1359.56	2564.32	2583.63		32.7542	3001.66	1231.19	1745.62	362.726	1666.27	1209.15	1396.55	2598.79		32.7542	2946.96	2744.67	1531.51	1843.16	2297.78	2221.97	2132.22	2265.36		32.7542	1056.36	381.534	1200.01	726.986	808.836	2076.16	258.082	1065.99		32.7542
33.0754	1929.46	800.767	728.469	891.616	1291.3	2278.6	231.479		33.0754	1307.09	1181.54	1297.26	2214.3	1663.94	1501.74	2328.09	2594.66		33.0754	2447.87	1330.81	1680.72	306.836	1485.99	1200.78	1454.15	2733.17		33.0754	2780.94	2568.93	1747.45	1761	2040.59	2143.23	2513.68	2746.89		33.0754	1593.61	592.031	1310.37	1071.32	1246	1745.75	156.377	885.973		33.0754
33.3965	1584.19	806.055	863.849	872.151	2000.66	1935.95	240.411		33.3965	1428.03	1630.81	1461.45	2410.96	1515.06	1768.9	2607.88	2484.08		33.3965	2751.32	1897.68	1480.73	365.699	986.486	1047.8	1307.73	2416.48		33.3965	2694.51	2480.21	1652.32	1637.52	1893.16	1923.58	3211.23	2524.98		33.3965	1493.09	744.226	1096.17	1107.46	877.836	2033.61	464.849	1039.13		33.3965
33.7176	1172.93	650.199	858.623	993.414	1593.99	1922.07	321.12		33.7176	1557.27	1882.29	2045.93	2112.47	1715.68	1819.98	2721.63	2494.92		33.7176	3162.8	2386.5	1632.18	410.137	1289.73	1154.83	1275.3	2516.51		33.7176	2598.05	3151.73	1923.02	1741.94	2078.38	2218.26	2876.09	2403.83		33.7176	1459.82	1007.72	1201.85	863.774	1099.5	1961.81	883.404	1072.51		33.7176
34.0387	1185.78	622.267	994.384	836.123	2121.07	1862.58	449.548		34.0387	1906.38	1147.92	1744.88	2179.26	1246.93	1689.37	2855.74	2505.41		34.0387	2786.23	2329.18	1426.32	403.329	1126.41	1608.23	1066.44	2411.62		34.0387	2686.7	2352.4	1939.15	1747.82	2036.42	2070.12	2683.67	1704.25		34.0387	1138.11	574.781	1170.22	686.178	990.562	2167.52	853.288	1223.53		34.0387
34.3598	1191.07	622.113	897.757	759.527	2034.6	2009.73	425.295		34.3598	2258.07	1304.28	2214.49	3119.66	1537.02	1887.67	2798.1	2815.45		34.3598	3099.38	1904.67	1637.42	430.432	1227.71	1562.89	1330.32	2898.89		34.3598	2679.53	2640.85	2462.32	2086.74	1833.28	1762.02	2370.5	1680.67		34.3598	970.442	619.599	1207.65	599.986	909.897	2354.74	894.065	994.387		34.3598
34.681	1291.98	709.836	944.781	1065.23	2101.48	2144.97	692.438		34.681	1650.98	1227.91	3002.27	2976.92	1882.02	1615.4	2516.21	3285.32		34.681	2335.66	1696.26	1714.03	555.438	1095.81	1790.49	1412.83	3843.03		34.681	2945.34	2842.9	2241.55	1923.42	2364.73	1936.01	2221.54	1872.71		34.681	1039.13	676.37	1179.53	654.822	922.842	2142.66	886.452	1288.04		34.681
35.0021	1230.29	872.503	785.952	1016.56	1853.75	2022.86	544.387		35.0021	1722.85	1398.8	2016.29	3440.87	2015.75	1737.48	2253.76	2593.44		35.0021	2100.83	1905.52	2275.68	879.682	1193.07	1798.31	1163.8	2822.86		35.0021	2609.2	2427.18	2085.25	2378.72	2095.71	2141.86	2633.99	2133.32		35.0021	1087.31	689.384	1337.1	940.788	951.736	2056.1	671.815	1208.85		35.0021
35.3232	1662.22	983.829	681.466	1173.36	1677.6	2135.31	574.801		35.3232	1854.56	1387.97	1960.36	2671.79	2140.86	2144.36	2122.12	2530.37		35.3232	2398.12	1855.22	2018.79	881.356	1247	2002.44	1237.53	2438.89		35.3232	2805.63	2113.6	2526.73	2008.67	2783.71	1738.59	2566.05	3099.81		35.3232	1473.33	507.822	1808.53	969.452	896.671	2778.58	555.123	1370.53		35.3232
35.6443	1656.42	756.565	769.479	1124.24	1971.08	2034.65	466.284		35.6443	2110.46	1276.05	1636.67	2635.36	2163.53	2624.89	2264.82	2671.45		35.6443	2737.34	2243	2032.75	967.065	1543.47	1587.37	1321.49	2236.85		35.6443	4085.89	2188.91	2510.89	2051.1	1932.84	1718.95	2881.54	3652.62		35.6443	1161.57	475.377	2085.52	826.51	1244.04	3461.9	792.579	1351.05		35.6443
35.9654	1760.35	904.699	998.014	924	2469.34	2103.81	510.397		35.9654	3269.85	1699.94	1488.05	1881.29	1684.45	2501.41	2782.1	2663.69		35.9654	2137.38	2123.29	1565.58	782.884	1319.84	1571.88	1293.89	2337.55		35.9654	3782.38	3203.13	1795.07	2477.95	2222.2	1839.01	3607.75	3099.51		35.9654	1066.26	902.5	2066.93	653.61	1420.69	3258.4	765.24	1275.91		35.9654
36.2866	2147.35	930.12	1162.46	1066.56	1987.92	1794.79	550.414		36.2866	2354.71	2049.65	1726.26	2377.12	1564.2	2346.97	2085.78	2398.49		36.2866	1765.04	2487.21	1669.24	786.86	1366.47	1627.47	1180.6	2894.88		36.2866	3532.1	2607.74	1738.37	2114.48	2165.54	2024.43	3285.2	2882.61		36.2866	1293.69	489.702	1587.72	837.072	1507.32	2925.71	609.216	1468.4		36.2866
36.6077	2131.41	920.863	1000.79	1276.34	1734.12	2010.91	633.459		36.6077	2473.07	1948.04	1560.07	1883.78	1637.27	2143.44	2070.55	2044.81		36.6077	2350.34	3126.21	1563.27	1060	1452.95	1284.1	1469.27	2499.52		36.6077	3181.33	2248.42	1799.45	2314.86	1793.26	2027.74	3347.1	3215.77		36.6077	1434.33	650.685	1293.23	828.301	1116.3	3665.75	802.781	1333.75		36.6077
36.9288	1760.55	903.712	946.777	1369.97	1708.83	2246.38	588.791		36.9288	2664.74	2255.47	1494.45	1853.09	1687.84	2451.2	1896.59	2722.42		36.9288	2349.08	2827.95	1639.88	1247.53	1524.67	1643.75	1810.97	3018.15		36.9288	2787.49	2500.78	2024.9	2532.51	1964.36	1956.39	3888.52	3501.73		36.9288	1610.45	1002.68	1228.64	902.11	1357.7	3355.07	851.308	1187.46		36.9288
37.2499	1739.17	942.603	1021.45	1513.42	1873.34	1908.59	515.096		37.2499	2789.8	2220.98	1814.32	1654.13	1592.16	2385.81	2248.53	2710.88		37.2499	2582.58	3072.85	1359.86	1608.4	1453.21	1452.86	2072.31	3901.13		37.2499	3106.05	3218.97	2216.07	2718.21	2226.2	2165.69	4095	3757.34		37.2499	1919.8	827.26	1182.19	1069.07	1367.36	3113.95	985.226	1172.33		37.2499
37.571	1591.41	907.462	1341.68	1861.28	2094.85	2574.83	604.397		37.571	2797.25	1814.9	1973.71	1725.32	1887.23	2009.94	2525.99	2915.67		37.571	1986.85	2494.95	1422.56	1333.15	1318.18	1877.96	2108.41	3840.86		37.571	2663.86	2841.37	2544.41	2649.33	2082.98	2457.2	3205.65	4054.38		37.571	1685.68	800.123	1198.84	886.116	1361.21	2899.91	1009.51	1279.5		37.571
37.8922	2083.68	1013.15	1105.97	2162.67	2066.23	3046.72	868.103		37.8922	3251.37	1756.89	2101.12	1870.3	2191.42	1897.59	2080.9	2674.62		37.8922	1992.9	2503.99	1667.11	1393.95	1422.78	2380.53	2030.03	3445.33		37.8922	2658.26	2539.22	1837.4	2228.93	2026.52	2060.88	2979.79	4023.56		37.8922	1872.44	987.589	1143.89	946.206	1089.12	3603.22	1290.3	1131.77		37.8922
38.2133	1858.32	881.017	1499.87	2106.85	2272.02	3983.02	647.096		38.2133	2869.06	1887.3	2368.17	1993.73	2882.48	1774.91	2344.14	3058.32		38.2133	3327.09	2750.47	2204.99	1122.25	1622.18	1854.19	2086.87	3714.63		38.2133	2207.28	2572.14	1761.65	2368.73	1694.06	1927.17	2251.09	2937.52		38.2133	1591.55	942.771	1484	795.068	1067.33	4091.76	1569.16	1449.97		38.2133
38.5344	1795.29	973.014	1134.79	2186.07	2322.16	3854.56	710.082		38.5344	3022.84	2054.01	2551.66	1697.21	2631.2	1888.73	2381.99	2852.38		38.5344	3356.9	2582.84	2510.11	1097.21	1331.29	1761.18	2265.14	3862.26		38.5344	2605.02	3104.02	1877.71	2761.99	1867	1902.73	2387.39	2326.74		38.5344	1612.96	689.856	1843.36	1088.22	1117.03	4095	1618.05	1573.57		38.5344
38.8555	1752.09	1247.71	1155.91	2126.2	2046.73	3015.35	590.962		38.8555	2735.24	1752.12	1950.64	2050.63	2303.14	1786.53	2603.04	2875.46		38.8555	2611.15	2185.58	2373.64	1185.48	2014.9	1970.27	2180.49	3450.43		38.8555	2903.96	2172.27	1727.5	2463.51	1685.04	1537.25	2508.71	2376.97		38.8555	1327.51	639.753	2073.85	1162.75	990.027	4095	1398.85	1151.97		38.8555
39.1766	1603.75	1265.84	1276.15	2081.21	2185.37	3180.34	603.925		39.1766	2542.53	1818.95	1709.89	2048.18	2355.15	1851.85	2291.29	3076.95		39.1766	2567.03	1871.66	2174.74	1104.7	1433.53	1953.64	1900.38	3173.7		39.1766	3187.34	1800.44	1980.73	2412.77	2021.22	1539.45	2661.96	1959.66		39.1766	1063.6	640.836	2135.38	1384.92	1069.51	4095	1058.85	1307.73		39.1766
39.4978	1584.24	1463.13	1649.95	2218.24	1991	3161.07	572.712		39.4978	2235.5	1641.09	2303.34	1677.08	1787.13	2565.04	2570.23	2845.22		39.4978	2303.69	2048.48	2779.45	977.158	1646.74	1777.63	1968.85	3259.59		39.4978	2959.48	2276.57	2446.8	2633.53	2167.89	1488.64	3903.59	1603.59		39.4978	1737.94	677.733	1734.22	1488.98	1012.74	3987.22	943.997	1343.26		39.4978
39.8189	1753.45	2004.81	1676.39	1972.96	2265.38	2568.82	724.247		39.8189	2075.88	2049.1	2804.84	1603.23	1905.18	2996.23	2482.72	2848.75		39.8189	2841.68	2004.38	2776.13	1016.51	1906.54	2359.32	1663.77	2315.55		39.8189	3260.75	2320.72	2495.16	2587.14	2326.09	1717.36	3357.65	2135.32		39.8189	1417.84	720.644	1845.79	1663.62	1138.36	3324.18	1032.05	1588.53		39.8189
40.14	1381.65	1915.55	1699.63	1937.09	2478.46	2771.24	623.942		40.14	2284.42	2165.4	2027.33	1948.48	1862.45	2252.18	2448.42	2847.57		40.14	2981.22	1871.96	2752.6	1133.67	1560.97	1963.92	1643.2	2357.45		40.14	3702.22	2583	3200.9	2123.24	2162.24	1594.27	3346.92	2350.83		40.14	1419.11	991.065	2002.23	1401.85	1512.87	3274.56	815.579	1679.35		40.14
40.4611	1513.45	1941.51	1598.22	1571.42	2504.3	2912.64	654.253		40.4611	2887.97	2498.97	2403.6	2486.27	2121.21	2552.48	2692.48	2977.25		40.4611	2708.07	2266.56	2445.52	997.315	2057.05	1817.37	1997.45	2953.66		40.4611	3801.58	2582.53	2657.14	1834.27	2462.32	1532.44	3137.15	2027.97		40.4611	1736.55	708.397	1761.93	1177.68	1248.49	3931.05	1040.29	1725.16		40.4611
40.7822	1623.03	1687.81	1661.1	1911.37	2811.94	2771.2	621.003		40.7822	2761.05	2455.44	3525.67	2520.49	1867.02	2384.41	2717.37	2968.83		40.7822	3068.85	2107.17	2370.5	1171.57	1972.95	1606.01	1839.6	3780.83		40.7822	4095	1823.63	2452.97	2033.76	3134.4	1684.08	2972.83	2482.58		40.7822	1380.26	685.935	2326.49	1453.38	1209.62	3716.35	1155.5	1917.27		40.7822
41.1034	1951.62	1414.26	2660.54	2178.81	2182.05	3051.62	595.89		41.1034	2334.42	2580.42	2938.04	3050.58	2001.62	2438.52	2345.91	2548.55		41.1034	3112.69	2196.22	2118.52	1244.39	1692.98	1451.19	1698.27	3663.32		41.1034	4071.33	2182.32	2554.89	1840.64	2250.53	1909.67	2885.05	2290.16		41.1034	1568.79	910.233	2136.32	1262.28	1115.43	4061.22	1226.91	2023.67		41.1034
41.4245	2285.12	1233.96	2275.13	2815.6	2459.32	3528.64	609.363		41.4245	2274.12	2558	2916.3	3749	2789.98	2016.35	2591.58	2728.87		41.4245	3482.54	1985.1	2167.43	1162.99	1601.28	1553.03	1828.53	2793.48		41.4245	3440.25	2143	2606.95	1894.93	2605.82	1865.42	2870.65	2030.99		41.4245	1607.15	730.445	2362.03	1382.63	1671	4095	1629.81	1768.61		41.4245
41.7456	1929.55	1299.88	1671.52	2046.04	2434	3781.13	666.397		41.7456	2261.04	2935.85	3664.89	3997.64	2172.78	2087.81	2588.26	3344.97		41.7456	4044.9	2080.48	2415.52	1230.93	1639.9	1626.45	1845.85	2961.56		41.7456	3532.32	1930.07	2212.62	1893.45	2203.22	1906.16	3139.47	2146.14		41.7456	1755.45	802.068	2329.84	1417.01	2142.99	4095	1526.16	1845.86		41.7456
42.0667	1810.29	1371.79	1632.73	1810.38	2663.73	3836.14	622.394		42.0667	1637.7	3407.45	3067.47	4058.68	1996.29	2835.86	3148.22	2860.9		42.0667	3381.63	2418.81	2764.52	1256.61	2017.58	1746.96	2154.27	2562.95		42.0667	3561.26	2026.52	2114.71	1919.3	2154.18	1716.54	2681.83	2040.08		42.0667	1770.66	1226.83	1920.86	1643.62	1713.9	4095	1350.09	2244.93		42.0667
42.3878	1749.79	1619.86	1483.23	1834.33	2607.09	3657.86	691.562		42.3878	1615.21	3204.85	2673.8	3794.85	1642.3	2756.24	3301.12	2223.28		42.3878	3216.63	2177.8	2511.12	1906.58	1979.76	1726.21	2560.11	2418.96		42.3878	3259.8	2155.7	2237.01	1742.6	1970.03	2046.42	2722.72	1980.54		42.3878	1649.76	1247.03	2081.53	1476.64	1446.07	4095	1288.55	1998.51		42.3878
42.709	1963.86	1480.74	1570.7	1877.07	2534.14	3695.71	576.206		42.709	1432.37	3084.33	2933.38	3323.78	1399.35	2456.28	3724.75	1682.56		42.709	3379.27	2160.47	2043.11	2033.08	1807.58	2092.93	2647.73	2391.05		42.709	3528.42	2943.4	2574.77	1704.1	2018.88	1836.49	2686.43	1694.14		42.709	1846.52	1239.69	2401.96	1294.62	1470.24	3620.36	1065.73	2021.04		42.709
43.0301	2166.97	1544.71	1427.37	2092.59	2551.73	2904.73	598.219		43.0301	2027.44	3227.81	2303.29	2860.62	2390.78	2152.77	4058.42	3021.86		43.0301	3924.97	2197.59	2100.48	2093.34	1914.16	1945.44	2444.53	2624.67		43.0301	3118.16	2220.18	2286.45	2056.73	2253.15	2001.81	3089.71	1427.97		43.0301	1594.82	1117.73	2295.16	1203.36	1765.41	2929.26	1616.74	1696.07		43.0301
43.3512	2445.86	1673.11	1453.84	1953.78	2417.37	3276.13	680.75		43.3512	1934.62	2889.4	3191.99	3204.47	3428.29	2018.97	2862.32	3773.21		43.3512	3435.65	2037.38	1727.53	1561.63	1940.34	1528.11	2440.69	2632.3		43.3512	3507.15	2350.63	1954.69	2379.66	2165.58	1601.71	3060.65	1689.31		43.3512	1433.71	1009.87	3029.77	1293.02	1380.81	2959.25	1454.98	1728.86		43.3512
43.6723	1823.2	1673.51	1371.95	2025.81	2110.66	3282.56	550.904		43.6723	2330.73	2368.19	2889.22	2809.67	3175.99	1951.85	2681.84	4095		43.6723	3337.18	1784.05	1882.33	1702.08	2055.6	1697.7	3005.6	2848.13		43.6723	3733.99	2245.21	1906.88	2744.74	2243.21	1475.53	2080.07	1897.6		43.6723	1426.97	1193.75	3090.01	1257.9	1649.45	3166.6	1517.27	1605.03		43.6723
43.9935	2260.73	2058.02	1422.49	2296.87	1920.74	3175.99	517.233		43.9935	2243.79	2549.68	2902.39	2961.33	2545.91	2935.18	2667.47	3936.82		43.9935	2958.42	1716.27	2383.68	1557.47	2042.18	1625.99	4015.97	2924.14		43.9935	4081.65	2361.72	1935.62	3503.94	2067.29	1498.06	2092.26	2373.84		43.9935	1291.76	847.836	2996.89	1107.53	1727.68	4032.94	1447.07	1635.41		43.9935
44.3146	2127.48	2017.75	1226.67	1799.22	1914.56	2758.96	681.603		44.3146	2371.68	2526.56	2350.36	3759.95	2403.59	3277.66	3467.41	3069.45		44.3146	3373.89	1899.08	2642.3	1555.34	2044.99	1787.15	3958.42	3668.89		44.3146	3710.53	2119.86	1972.08	3328.89	1925.3	1399.4	1978.6	2823.14		44.3146	1094.16	949.753	3022.49	1047.62	1818.93	4095	1587.18	2053.3		44.3146
44.6357	2315.91	1787.33	1649.45	1900.29	1955.77	2962.26	535.24		44.6357	2562.4	2699.63	2363.51	3490.3	2197.76	2625.78	2235.84	3522.61		44.6357	3297.76	2731.52	3155.06	1583.25	2168.57	1618.39	3850.28	4095		44.6357	2554.34	2234.08	1673.06	3039.75	2143.25	1285.85	3827.57	2881.39		44.6357	1341.24	868.825	3065.73	1296.04	1917.67	4095	1746.45	2048.89		44.6357
44.9568	2638.17	2204.49	2185.83	2085.3	2337.44	3066.88	595.288		44.9568	2219.92	2474.13	2161.8	4095	2596.91	2267.55	2139.99	2729.8		44.9568	2765.1	2352.33	3649.05	1434.2	2053.25	1367.17	3248.97	3984.92		44.9568	3230.49	1983.11	1536.75	2788.4	2799.5	1161.58	4046.03	2515.68		44.9568	1458.84	891.199	3280.1	1325.38	1731.87	4093.87	1500.49	2315.39		44.9568
45.2779	2351.2	2313.07	2198.56	2027.75	2592.23	3356.52	503.733		45.2779	2241.52	2261.86	2109.23	3917.1	2415.8	2492.08	2268.53	2528		45.2779	2449.1	2531.11	3010.52	1725.07	1767.37	1591.45	2863.32	3500.45		45.2779	2811.5	2084.76	1292.3	2697.58	2483.03	1103.42	3014.54	1902.47		45.2779	1910.89	895.092	2660.3	1249.81	1581.06	4095	1394.32	2028.34		45.2779
45.599	2580.38	2220.42	2166.23	2085.4	3508.77	3110.35	420.753		45.599	1992.05	2129.04	2751.71	4095	2629.48	3090.32	2052.38	2468.33		45.599	3683.84	1777.92	2691.88	1692.48	1770.63	2084.99	3692.14	2756		45.599	2014.4	2531.07	1322.79	2391.38	2831.55	1253.27	2624.23	2093.96		45.599	2100.49	1291.85	2605.45	1091.9	1582.3	3572.26	1391.7	2831.04		45.599
45.9202	2294.3	2052.88	2132.09	2284.64	3663.48	2634.02	575.729		45.9202	2160.84	2204.98	2721.94	4060.87	2906.81	2883.51	2086.65	2649.48		45.9202	3370.71	2127.7	2604.58	1770.53	2589.62	1755.8	3660.6	3109.72		45.9202	1910.21	2847.87	1684.02	2398.72	3337.92	1316.7	3004.48	2330.94		45.9202	1698.41	1168.91	2734.95	1362.1	2007.91	3729.04	1265.06	2226.79		45.9202
46.2413	1739.77	2115.11	1818.59	2326.96	3131.11	2375.21	488.068		46.2413	2016.14	1922.59	2755	4094.36	2893.1	2753.62	2855.92	2951.04		46.2413	3892.8	2222.68	2151.51	1963.12	2429.6	1760.09	3652.32	2469.73		46.2413	2203.24	3207.12	1466.23	2724.65	2347.4	1477.11	1944.19	2244.98		46.2413	1745.32	1656.39	2714.66	1308.68	2415.85	3798.9	1129.23	2558.3		46.2413
46.5624	2097.04	2349.56	1509.11	2345.19	3013.72	2702.9	421.534		46.5624	2613.29	1995.64	2937.72	4095	3495.01	3539.15	2935.39	3349.83		46.5624	2926.31	1920.32	2413.91	2128.96	2044.64	1765.62	4095	2543.98		46.5624	1888.97	4094.39	1574.1	3363.03	1795.5	1736.72	1964.96	2306.03		46.5624	1521.5	1251.79	3371.16	1129.84	2351.14	3329.11	1196.17	1549.65		46.5624
46.8835	2238	2599	1599	2556	2945	2888	572.5		46.8835	3038	2410	2732	4095	3632	2545	2741	3178		46.8835	2828	1755	2469	2496	1941	1949	4095	2683		46.8835	1687	4095	1690	3389	1695	1698	1657	2351		46.8835	1163	979	3554	1175	2378	2906	991	1506		46.8835
47.2047	1885.62	2787.79	1433.59	2848.84	3636.58	4095	416.541		47.2047	3185.26	2603.07	2836.28	3789.33	2677.08	2807.55	2808.59	3728.07		47.2047	2873.83	1546.28	1845.57	2030.34	1975.67	2034.25	4095	2699.68		47.2047	1714.23	4095	2228.41	3516.2	2078.72	1585.54	2380.1	2381.47		47.2047	1151.42	1071.7	2998.73	1267.7	2413.98	3038.47	1052.07	1452.84		47.2047
47.5258	2564.18	2843.63	1442.18	3972.7	3088.38	3884.15	460.63		47.5258	2894.36	2082.93	4056.73	2405.75	2383.92	2604.16	3310.38	4094.71		47.5258	2602.26	1698.17	2307.08	1884.81	1976.14	2375.68	3929.45	2375.43		47.5258	2272.45	4095	2207.45	3643.81	1754.45	1533.64	2752.32	2196.39		47.5258	1040.13	1039.73	2615.1	1602.36	2445.14	3402.5	1276.19	1581.47		47.5258
47.8469	2088.08	2450.5	1764.43	3634.17	3224.98	3252.78	450.894		47.8469	1728.8	1978.08	3102.95	2060.79	2437.58	2762.31	3865.38	4095		47.8469	2438.14	2491.48	2390.36	1643.88	2106.23	2021.37	4037.58	2665.12		47.8469	2290.2	4024.73	2468.2	2778.92	1876.68	1197.32	1970.89	2841.3		47.8469	1285.93	1001.31	2458.44	1145.1	2152.29	4095	1759.66	1684.71		47.8469
48.168	1780.55	2566.05	1667.47	3181.45	2613.3	2842.52	512.096		48.168	2092.01	2668	2735.88	2649.25	2244.58	2786.73	4090.21	3831.68		48.168	3436.42	1858.74	2434.74	1618.26	1985.95	1693.93	3071.82	3447.21		48.168	2195.16	4095	2684.26	3279.78	1338.97	1389.22	2371.53	2213.49		48.168	1511.21	818.493	2066.21	1474.84	1740.9	4095	1651.23	1274.27		48.168
48.4891	2146.65	1925.03	2327.88	3073.64	2158.41	2468.46	659.206		48.4891	2711.31	2639.15	3524.49	3019.24	2332.18	2538.22	3645.85	3384.87		48.4891	2852.96	2004.43	2893.53	1655.49	1799.22	1689.93	2864.89	4095		48.4891	2082.84	4088.54	2212.4	3077.89	2090.82	1179.29	2541.19	1792.23		48.4891	1802.52	988.353	1908.31	2075.41	1522.63	4095	1198.77	1293.22		48.4891
48.8102	1890.12	1807.6	2662.77	3344.73	2134.05	2853.03	416.205		48.8102	2631.79	2457.66	3086.27	3080.64	2127.69	2477.6	3815.09	3562.98		48.8102	3799.32	2213.37	2185.97	1601.67	1835.85	1734.83	3346.1	4095		48.8102	1948.13	4064.01	2203.31	2801.42	1891.29	1088.97	2705.25	2161.47		48.8102	2527.97	973.199	1647.02	1539.87	1914.08	4004.82	1058	911.199		48.8102
49.1314	1800.33	1935.86	3043.4	3219.2	2684.59	2704.17	468.969		49.1314	2530.16	2072.55	3277.41	4089.1	2058.68	2474.55	3360.79	3786.38		49.1314	3461.22	2275.75	2750.95	1662.07	1777.09	1693.23	3613.02	3462.31		49.1314	2089.33	3253.49	2304.87	2386.95	2086.82	1220.24	1648.01	2673.97		49.1314	2129.21	1039.68	1758.18	1504.11	2200.48	3430.49	862.5	1222.92		49.1314
49.4525	1932.92	2098.7	2734.33	3337.76	2966.78	2727.09	625.075		49.4525	2433.92	2217.9	3006.66	3959.97	2789.86	3325.86	3143.21	3418.32		49.4525	3997.55	2338.21	2526.89	1804.23	1781.4	2112.75	3930.63	3981.21		49.4525	1857.59	3032.36	1988.86	2544.52	1915.36	1684.78	1867.82	2081.33		49.4525	2175.96	999.178	2508.21	1452.7	2043.82	3205.3	784.616	1505.59		49.4525
49.7736	1996.43	2083.3	2047.92	3090.56	3564.7	2897.15	573.027		49.7736	2809.41	1901.22	2910.18	3393.32	2112.36	2342.56	3159.89	2869.53		49.7736	3367.43	2572.48	2812.66	1715.55	2374.97	1529.71	3530.94	3523.88		49.7736	2166.87	2675.15	2258.28	2777.33	1802.18	1132.93	2110.93	2153.2		49.7736	2166.13	987.325	3405.39	1137.91	1548.13	3329.99	892.99	1645.53		49.7736
50.0947	2154.62	2451.26	1825.9	2548.66	3881.42	3708.89	677.836		50.0947	3283.5	2011.49	2951.21	2600.09	1695.1	2250.95	3337.85	2833.12		50.0947	3016.51	2763.66	2536.66	1951.08	2557.03	2134.4	4082.71	2536.08		50.0947	2234.34	2491.66	2582.75	2057.1	1630.14	1370.4	2298.59	2263.09		50.0947	2350.08	1038.34	2204.36	1157.82	1334.95	2673.6	1280.19	1816.28		50.0947
50.4159	2850.01	2390.91	1705.94	1876.51	2544.6	3788.37	587.534		50.4159	3666.9	1830.73	2413.02	2317.18	1871.03	2335.14	3955.39	2477.05		50.4159	3787.05	3530.26	2004.3	2132.43	2550.59	1744.3	4089.95	2477.05		50.4159	2148.92	2843.89	2141.7	2286.17	1723.92	1431.63	2364.81	2559.24		50.4159	2120.47	1236.76	2119.22	1167.37	1379.89	3228.29	1091.63	2173.41		50.4159
50.737	2880.08	2520.6	1913	1542.13	1722.55	4095	784.164		50.737	3489.86	1871.04	2169.7	2170.64	1699.04	2151.9	4026.92	2888.88		50.737	3367.75	2851.36	1900.4	1676.58	2474.6	1669.42	3666.26	2756.79		50.737	2119.63	2316.9	2012.08	2737.89	2188.01	1088.14	2773.88	2529.63		50.737	2059.71	1294.12	1895.3	1170.77	1354.34	3374.42	952.206	2227.4		50.737
51.0581	2165.98	1912.6	1917.22	1606.9	2038.54	4095	560.623		51.0581	3568.44	2909.45	2093.88	2308.59	1779.85	2095.77	4074.16	2665.3		51.0581	3389.75	2850.73	1907.98	1455.93	2139.06	2075.35	3486.18	2859.07		51.0581	2069.48	2223.93	1944.79	2184.64	2685.51	1111.86	2273.43	2025.01		51.0581	2105.65	1295.82	2436.58	1653.76	1787.28	3325.29	987.651	2091.54		51.0581
51.3792	2444.66	1734.08	2386.15	1674.51	2193.65	3622.67	426.904		51.3792	3077.99	2145.82	2680.59	2488.11	2229.12	2025.1	3773.09	2860.66		51.3792	3268.37	2975.47	2313.87	1237.86	2195.68	1980.45	2242.41	3285.54		51.3792	2802.17	2166.51	2118.86	2217.9	2552.45	1197.37	2842.96	1783.1		51.3792	1564.37	1128.49	2066.93	1730.4	2139.88	2517.14	938.13	1977.35		51.3792
51.7003	1876.88	1644.02	2422.36	2074.02	3313.59	4030.49	527.825		51.7003	2690.76	2291.25	2676.11	2958.73	2223.54	1896.76	2799.13	3080.18		51.7003	3437.95	2840.11	2944.7	1193.6	2128.26	1444.94	2072.7	3053.05		51.7003	3216.72	2215.02	2607.82	1784.94	3201.25	1512.37	2578.55	2455.96		51.7003	1393.82	1090.7	2080.26	1639.95	2160.9	2260.77	958.997	1970.24		51.7003
52.0215	2148.56	2040.68	2273.99	2035.92	1717.56	3833.05	583.685		52.0215	3696.03	1977.51	2628.48	3284.58	2111.41	1808.45	2019.34	2486.42		52.0215	3900.18	3265.07	2688.58	1109.47	1917.03	1501.25	2369.07	3360.96		52.0215	3093.95	2544.04	2971.25	2041.05	2932	1417.48	3079.05	1687.15		52.0215	1332.95	1234.55	1890.53	1691.37	1511.21	2565.55	972.151	2203		52.0215
52.3426	1963.65	1782.69	2090.2	2638.49	1509.31	3767.47	486.113		52.3426	2942.89	2144.04	2560.07	3365.68	2298.4	2011.47	2101.98	2711.61		52.3426	3921.73	3066.52	2167.95	954.661	1910.35	1549.52	1990.38	3401.54		52.3426	2803.66	2192.98	2220.84	2566.14	3527.42	1315.66	2371.87	2256.83		52.3426	1367.27	1132.68	1761.02	1531.18	1758.9	3313.29	884.212	1932.95		52.3426
52.6637	1920.05	1607.4	1800.93	2387.92	1630.39	3713.64	492.37		52.6637	2914.06	1729.92	2188.08	2857.83	2639.61	1726.32	1861.14	2952.71		52.6637	3189.12	2595.77	1964.17	1053.42	1837.74	1578.32	2362.94	4079.96		52.6637	3600.12	2127.63	2153.38	2037.84	3078.69	1431.16	2592.64	2544.14		52.6637	1266.16	1283.95	1789.13	1350.79	2145.93	4055.19	1040.75	1459.66		52.6637
52.9848	2136.12	1997.8	2156.1	2238.77	1506.67	3835.01	559.116		52.9848	2612.07	1677	2161.37	2965.6	3173.39	1464.4	2375.92	3277.78		52.9848	3147.14	2570.12	2535.07	1444.9	1420	2436.08	2769.87	4095		52.9848	3081.89	2222.98	1986.22	2297.58	2713.29	2068.06	2533.65	2267.19		52.9848	1373.66	888.445	2033.35	1087.1	2310.5	4032.01	1065.17	1531.32		52.9848
53.3059	1693.19	2031.45	1811.64	2156.16	1937.25	2944.23	539.863		53.3059	1919.85	1582.12	2066.37	3494.95	2609.78	1756.03	2164.42	2862.4		53.3059	2885.48	2223.14	1990.89	1411.6	1646.55	2017.11	2669.23	2825.4		53.3059	2216.66	2475.37	1867.75	2905.41	2590.14	1827.81	2628.7	1562.11		53.3059	1463.19	965.932	2506.36	1008.1	2382.18	3249.45	1141.9	1998.44		53.3059
53.6271	1685.58	2254.02	1940.12	2042.13	1739.16	3333.87	572.336		53.6271	1933.46	1590.68	2133.65	3362.57	2589.13	1753.64	2102.1	2612.04		53.6271	3140	2525.44	2568.58	1607.17	1564.81	1867.41	3310.1	2375.63		53.6271	2052.68	2319.5	1967.5	3004.12	2708.68	1585	2232.22	1743.95		53.6271	1525.96	1151.08	2837	1255.99	1869.02	2893.95	1120.99	1597.84		53.6271
53.9482	1980.02	2456.07	1486.05	2151.73	1850.03	3935.75	499.26		53.9482	1654.39	1811.02	1888.34	3162.38	2810.6	1936.82	2511.89	2430.27		53.9482	3018.12	2713.21	2775.06	1407.04	1451.99	1968.24	2748.77	2420.82		53.9482	1927.51	2716.34	2329.27	2871.6	2548.97	1450.49	2006.82	1736.46		53.9482	1565.77	942.678	1836.07	1445.19	1809.87	2719.84	847.644	1496.83		53.9482
54.2693	2010.65	2250.87	1501.7	1938.12	1791.89	3810.83	374.247		54.2693	2091.15	1845.85	2204.01	2709.13	4064.52	2073.3	2280.35	3212.79		54.2693	2685.74	1660.82	2787.51	1635.95	1286.14	2177	2395.19	2516.74		54.2693	1884.76	2742.07	2125.66	2638.09	2099.11	1364.93	2149.43	1587.82		54.2693	1380.67	1102.61	1796.46	1335.02	1515.3	2705.3	984.582	1167.97		54.2693
54.5904	2472.48	2779.58	1707.19	2080.06	2562.4	4095	554.794		54.5904	2873.16	1798.48	2261.34	2658.52	2464.26	1640.62	2367.96	3608.16		54.5904	2379.21	2025.89	2471.38	1349.03	1304.81	1839.3	2516.08	2468.68		54.5904	2062.64	2070.32	2131.47	2318.27	2036.1	1531.63	2536.45	1737.34		54.5904	1068.15	964.699	1994.99	1710.14	1424.05	2580.37	630.89	1101.21		54.5904
54.9115	1924.67	2823.74	1548.03	1962.06	2138.51	4016.27	450.479		54.9115	2505.31	1600.51	1975.75	3208.07	1619.98	1606.28	1993.25	2765.22		54.9115	2155.84	1481.4	2276.07	897.075	1780.92	1500.04	2376.78	3100.73		54.9115	2313.28	2120.15	1727.93	2737.49	1642.8	983.654	2153.88	2234.04		54.9115	1171.39	1052.64	2170.11	1460.56	1358.45	2928.09	565.568	1041.55		54.9115
55.2327	1494.42	2580.4	1850.8	2055.25	1871.4	3972.12	271.863		55.2327	2265.24	1441.31	2121.61	3259.42	1726.86	1550.4	1674.95	2281.81		55.2327	2455.76	1325.83	2194.99	939.794	2062.03	1371.43	2259.89	3003.19		55.2327	2947.5	2371.63	1624.42	2871.53	1868.32	1319.23	1802.4	2418.64		55.2327	1053.25	1014.38	2364.25	1452.15	1119.45	3638.84	631.5	1071.39		55.2327
55.5538	1498.13	2406.38	2443.08	2371.39	1483.41	3683.42	439.274		55.5538	1936.68	1913.89	2313.91	2636.16	1735.31	1866.43	1503.77	3189.89		55.5538	2079.42	1147.84	2195.66	711.596	979.11	1904.86	1960.64	3091.82		55.5538	2139.5	1697.76	1337.6	2858.24	2082.83	1251.85	1996.4	1865.56		55.5538	1098.82	1060.55	1488.96	1078.44	1392.84	3946.26	622.64	1351.56		55.5538
55.8749	1464.59	2155.87	2161.29	2137.82	2012.34	4095	342.329		55.8749	2029.86	1688.15	1976.95	2209.86	1992.26	1421.1	2313.05	3040.75		55.8749	2176.82	1482.66	1883.34	703.849	1288.58	2059.03	2402.11	3017.52		55.8749	2127.03	1801.79	1842.47	2669.22	1875.82	1333.15	1824.32	1764.15		55.8749	1478.67	891.151	1828.47	929.932	1503.3	3387.38	673.233	1788.29		55.8749
56.196	1364.8	2399.83	2753.21	1965.47	2054.16	3753.57	460.452		56.196	2010.84	1516.48	1942.7	2103.42	1771.98	1873.39	2031.42	2070.26		56.196	2350.92	1415.54	1855.42	742.044	769.853	1672.7	3063.18	2366.79		56.196	2308.37	2518.63	1647.22	2801.22	1624.21	1595.05	2034.54	1852.63		56.196	1256.34	713.901	2037.82	959.822	1441.11	2544.9	867.363	1384.57		56.196
56.5171	1062.09	3131.38	2259.73	1769.47	2212.62	3861.52	523.082		56.5171	2244.71	1400.55	1915.12	2305.99	2416.8	1380.79	2210.8	3577.38		56.5171	2303.73	1471.21	1945.28	892.199	764.322	1858.58	2125.73	2760.53		56.5171	2408.49	2373.92	1913.53	2895.07	1805.02	1890.52	2003.77	1509.59		56.5171	1168.06	650.884	1848.8	778.747	1506.17	2257.6	875.007	1123.76		56.5171
56.8383	1481.62	3325.37	2219	1302.07	1980.9	3717.71	462.911		56.8383	2129.74	1580.07	2206.63	2070.09	2471.59	1310.89	2641.35	4060.5		56.8383	2420.85	1370.06	1666.03	832.144	866.353	1885.28	1679.25	2026.2		56.8383	3197.8	2301.03	2267.22	2845.9	2156.62	1781.65	2034.09	1731.75		56.8383	1189.71	633.065	1793.64	747.918	1316.11	1740.36	1032.52	855.336		56.8383
57.1594	1413.15	3055.89	2048.56	1371.31	2225.58	3626.43	585.116		57.1594	2157.66	1464.62	2415.4	1906.41	2220.86	1598.33	2505.32	3351.11		57.1594	2239.27	1218.81	1515.9	951.11	761.973	2464.05	1790.97	2181.68		57.1594	2765.81	2644.42	1594.36	2817.71	2496.34	1581.44	1704.23	2336.36		57.1594	1158.08	689.301	1476.81	707.192	1575.05	1958.53	1206.48	1122.23		57.1594
57.4805	1225.09	3008.56	1900.3	1327.93	2023.24	3419.79	435.86		57.4805	3000.49	1718.98	2362.43	2390	1933.89	1516.21	2824.29	3044.64		57.4805	2315.5	1608.02	1874.79	903.976	845.308	2349.39	1459.74	2359.08		57.4805	2743.7	2795.67	1411.16	2260.69	2568.16	1418.49	2016.13	2228.3		57.4805	1359.65	479.531	1657.39	617.702	1657.74	2317.95	1051.75	978.442		57.4805
57.8016	874.829	2667.42	2423.45	1398.88	1747.46	3665.96	448		57.8016	2556.03	1756.76	2215.79	1640.4	1819.38	1807.23	2146.14	2338.97		57.8016	2306.18	1394.23	2472.82	826.178	722.938	2341.63	1423.56	2521.33		57.8016	2471.01	3360.79	1511.45	2433.33	2323.16	1184.23	2073.08	1976.92		57.8016	1210.72	545.521	1439.15	614.075	1496.17	2745.42	1118.9	1050.71		57.8016
58.1227	931.894	2106.88	2270.95	1712.84	1062.33	3565.64	345.791		58.1227	2228.03	1501.59	2243.13	2243.94	1726.8	1813.81	2312.5	2291.79		58.1227	2327.4	1429.88	2126.11	497.784	1156.83	2047	1164.94	2790.68		58.1227	2894.07	3248.18	1206.08	2468.51	2224.72	1240.97	2128.07	2074.2		58.1227	1333.89	454.318	1812.12	903.154	998.185	1877.2	1444.95	1014.14		58.1227
58.4439	924.63	1856.95	2565.71	1324.26	1036.33	3408.14	356.692		58.4439	2378.52	1691.38	2085.66	1768.44	1375.82	1581.93	2605.32	2159.38		58.4439	1837.56	1735.01	2095.99	417.562	870.794	2084.52	1377.23	2912.59		58.4439	3254.36	2664.58	1372.67	2831.93	2069.64	1387.7	2139.3	2210.48		58.4439	1208.6	437.863	1785.78	823.151	823.123	1481.88	1283.88	1213.47		58.4439
58.765	1018.78	1675.16	2194.75	1018.9	1052.26	3136.91	261.041		58.765	2436.76	1531.85	2312.97	2075.29	1224.74	1530.3	2478.71	2800.66		58.765	1616.54	1013.17	1547.94	467.411	923.14	1994.27	1115.53	3107.67		58.765	2931.17	2053.19	1404.28	2897.12	2543.05	1415.93	1802.5	2189.26		58.765	1105.06	641.206	2111.65	612.521	947.298	1822.92	902.993	1379.16		58.765
59.0861	1308.84	1792.55	1860.45	983.548	1156.2	2925.52	194.096		59.0861	2173.36	1367.26	2228.22	1977.68	1118.72	1297.45	2537.27	3361.88		59.0861	1566.77	980.027	1804.68	386.315	881.849	1473.03	1274.86	3725.51		59.0861	2908.73	1878.49	1584.86	2794.16	2315.22	1597.75	2203.86	1744.42		59.0861	949.555	999.658	1983.42	469.541	916.623	1808.01	680	1190.68		59.0861
59.4072	1295.92	2145.59	1507.41	866.497	1340.09	3029.39	220.586		59.4072	1861.25	1322.79	2152.75	1831.7	1227.75	1174.11	2270.2	3740.35		59.4072	1840.39	1112.92	1490.64	407.908	674.521	1296.9	1218.66	2887.5		59.4072	2872.05	1700.14	2023.26	2741.66	1960.64	1510.41	2569.44	1779.15		59.4072	1049.55	1189.43	2120.26	380.945	874.664	1897.54	523.709	1241.11		59.4072
59.7283	890.616	1836.41	997.479	721.26	1226.97	3153.01	240.733		59.7283	1748.23	1344.22	2328.41	1755.97	1120.62	1640.86	2275.26	3376.9		59.7283	2124.25	1355.93	1436.93	397.096	582.699	1246.29	1214.7	2734.32		59.7283	2794.05	1599.55	1585	2493.12	1851.53	1597.07	2124.99	1735.18		59.7283	1041.74	681.137	1836.66	400.096	883.836	2422.53	591	1145.97		59.7283
60.0495	734.99	1909.88	921.377	722.616	1567.5	2613.52	170.654		60.0495	1784.43	1261.29	2206.49	1769.15	1381.23	1455.06	2430.79	2359.45		60.0495	1906.38	1286.61	1502.25	292.582	451.257	981.288	1203.91	2356.58		60.0495	2553.76	1750.91	1410.56	2366.3	1922.07	1613.77	2222.72	1635.12		60.0495	1041.39	658.14	1618.14	738.151	801.668	2396.68	688.904	644.171		60.0495
60.3706	664.281	2320.52	874.952	802.973	1323.95	3245.33	176.479		60.3706	1616.12	1171.02	2032.35	1941.51	1275.45	1485.62	2002.67	2346.61		60.3706	1633.51	1264.67	1270.09	348.007	643.144	751.014	996.815	2545.82		60.3706	2622.03	1848.97	1712.12	2083.38	2307.72	1717.33	2118.66	1964.57		60.3706	1010.79	501.315	1527.39	696.226	858.137	1960.98	603.281	761.904		60.3706
60.6917	926.301	3542.72	900.973	763.075	1720.2	2940.61	157.76		60.6917	1770.79	1194.18	1832.73	1765.05	1202.72	1644.21	1477.11	2787.41		60.6917	1254.08	1161.4	1380.27	306.952	414.545	950.116	960.284	2859.06		60.6917	2415.73	2495.91	1477.35	2199.67	2748.22	1872.34	2227.58	1756.64		60.6917	1067.99	511.5	1345.49	678.894	746.514	1843.47	716.01	663.075		60.6917
61.0128	757.685	3138.38	906.397	736.151	1656.97	2488.36	130.767		61.0128	1688.14	1177.73	1800.53	1309.05	1415.36	1419.19	1908.63	3823.75		61.0128	1379.49	1142.29	1045.66	309	572.699	975.699	1382.67	2622.95		61.0128	1936.23	2213.12	1440.92	1752.99	2503.67	1566.66	2375.73	1980.47		61.0128	987.411	287.425	1218.9	403.836	559.384	2098.63	641.438	789.973		61.0128
61.3339	845.623	2122.37	967.575	707.846	1600.37	2643.64	90.7979		61.3339	1971.55	1011.29	1817.53	1673.49	1651.83	1544.75	1963.39	2567.88		61.3339	1410.11	1236.57	1138.44	259.459	521.116	613.075	882.377	2482.89		61.3339	1857.88	2840.03	1822.2	1646.14	2133.01	1217.59	1897.29	1742.04		61.3339	921.339	184.014	1555.37	298.589	564.558	1832.96	805.904	511.394		61.3339
61.6551	957.849	2301.42	1102.95	801.521	1304.1	2343.12	143.507		61.6551	1953.9	1129.9	1873.64	1800.45	1458.78	1454.74	2282.71	2338.68		61.6551	1701.24	1072.82	1213.25	576.719	766.541	536.199	787.473	2130.39		61.6551	2002.15	2663.28	1773.63	1606.86	1694.77	1293.97	2025.98	1810.95		61.6551	923.582	169.075	1561.5	389.637	533.116	1864.9	1009.81	412.863		61.6551
61.9762	652.305	1955.75	1096.84	803	1147.71	2214.05	106.74		61.9762	1960.64	922.212	2173.32	1637.48	995.284	1880.5	2236.33	1940.15		61.9762	1410.99	1124.15	1492.6	493.428	573.312	479.548	773.757	2071.18		61.9762	1785.77	2174.11	1749.92	1111.89	1906.24	1207.39	2541.1	2037.76		61.9762	926.88	198.527	1399.68	358.589	843.959	1830.49	556.521	485.599		61.9762
62.2973	697.712	1803.45	1187.49	829.959	1138.04	1903.26	111.966		62.2973	1508.82	980.247	1598.21	1837.75	1185.75	1591.25	1868.52	1985.01		62.2973	1514.11	702.082	1309.42	427.685	856.233	364.836	906	1768.29		62.2973	2629.66	2012.33	1755.25	1290.97	1981.58	1229.73	2404.75	1862.07		62.2973	896.315	214.151	1734.79	341.548	882.781	2208.21	603.425	377.685		62.2973
62.6184	559.041	2054.77	1407.63	669.767	783.925	1763.75	130.291		62.6184	1585.19	805.267	1698.92	1659.66	822.456	1405.37	1748.92	1723.21		62.6184	1572.3	625.158	1208.67	233.182	657.068	570.027	720.233	1780.25		62.6184	2743.16	2343.18	1282.8	1573.9	2959.76	866.856	2886.28	1447.29		62.6184	812.596	227.788	1871.62	374.897	792.137	1781.57	438.801	420.63		62.6184
62.9395	606.747	1829.27	1171.38	672.932	656.87	1877.3	99.4247		62.9395	1638.14	744.322	1868.29	1599.8	863.459	1212.47	1591.33	1765.12		62.9395	1529.6	851.897	1151.75	294.822	709.473	437.233	588.596	1717.38		62.9395	2632.01	1970.97	1403.37	1493.84	2556.51	1077.47	2264.89	1550.47		62.9395	739.062	232.295	1833.76	562.404	613.938	1851.86	275.726	433.247		62.9395
63.2607	443.209	1788.15	1179.49	643.034	871.771	1835.11	76.2397		63.2607	1392.08	840.904	1669.8	1182.68	880.908	1212.68	1247.02	1642.61		63.2607	1560.55	799.733	1084.72	224.894	551.445	592.479	662.462	1478.83		63.2607	2554.65	1685.86	1112.92	1428.82	2563.44	888.99	1820.57	2499.97		63.2607	866.182	216.291	1672.1	404.873	550.459	1957.07	347.202	282.147		63.2607
63.5818	723.534	1626.89	978.973	484.466	875.767	1836.95	94.1301		63.5818	1343.52	902.219	1691.44	1223.85	897.63	1292.42	1570.52	1637.84		63.5818	1444.04	620.479	1114.84	264.644	672.329	329.795	606.041	1123.47		63.5818	2318.52	1456	820.986	1540.42	2540.14	952.096	2308.4	2908.26		63.5818	744.904	237.205	1594.63	241.274	396.945	1626.74	398.014	366.877		63.5818
63.9029	520.089	1829.8	854.678	553.394	750.428	1914.23	83.7637		63.9029	1873.94	853.055	1693.28	1320.5	1041.34	862.308	1710.25	1557.8		63.9029	1294.46	556.171	1244.47	252.168	596.264	466.853	713.288	1373.2		63.9029	2302.67	1755.96	951.113	1228.07	2072.34	989.147	2454.58	2703.4		63.9029	646.877	237.366	1509.39	337.158	373.247	1763.71	284.264	397.538		63.9029
64.224	673.651	1652.16	804.342	518.219	818.411	2269.26	91.9041		64.224	1684.6	1163.93	1544.62	1962.97	914.041	1175.3	1919.58	1624.38		64.224	1488.4	556.014	1102.66	234.034	424.808	422.007	769.877	1577.83		64.224	2644.1	1880.86	845.699	1131.88	2287.87	1066.77	2075.56	2417.26		64.224	651.5	305.336	1685.21	422.267	445.425	1796.29	429.048	383.918		64.224
64.5451	605.551	1311.64	855.212	452.288	836.935	1931.72	93.7808		64.5451	1552.04	1039	2001.28	1723.31	728.384	1253.04	1761.42	1253.87		64.5451	1468.82	562.435	1085.69	232.791	302.219	372.058	591.938	1650.58		64.5451	2203.15	1795.96	893.034	1107.4	1826.71	1194.13	1982.38	2664.58		64.5451	638.147	292.178	1540.23	288.846	522.226	1779.47	372.024	411.425		64.5451
64.8663	429.397	1204.47	605.575	422.514	887.274	1569.47	62.7603		64.8663	1547.71	853.479	1662.56	1479.48	536.685	949.904	1606.53	1609.92		64.8663	1377.67	469.808	1369.4	309.726	216.164	384.205	531.192	1601.93		64.8663	2140.4	2033.63	1287.71	1040.33	2270.96	1257.63	2470.96	2546.07		64.8663	449.014	175.836	1617.27	235.767	666.301	1439.66	329.726	346.041		64.8663
65.1874	476.154	1073.79	444.24	418.818	1056.34	1303.77	110.226		65.1874	1424.97	846.634	1706.64	1559.26	533.271	1072.43	1537.89	1628.96		65.1874	1108.53	490.702	1551.68	483.599	285.452	471.116	615.058	1552.83		65.1874	2135.58	2038.78	1109.41	982.456	1419.34	1166.13	2267.35	3010.05		65.1874	447.185	129.89	1884.52	272.997	717.908	1209.82	289.709	281.479		65.1874
65.5085	437.445	1206.99	380.192	395.178	655.801	1597.84	49.411		65.5085	1261.62	785.021	1494.55	1412.29	662.192	895.459	1672.79	2012.32		65.5085	1192.82	668.342	1102.47	361.712	187.514	390.719	579.452	1588.45		65.5085	1977.88	3102.22	1145.2	1127.02	1543.98	1229.26	2308.83	2833.23		65.5085	513.911	165.76	1695.11	187.719	600.288	1505.46	304.295	325.767		65.5085
65.8296	335.411	1423.48	479.887	299.414	678.904	1510.07	71.2979		65.8296	1255.84	881.462	1226.07	1302.39	491.908	855.39	1934.61	3043.49		65.8296	1344.63	791.89	1242.2	239.599	140.527	541.61	831.997	1470.01		65.8296	1471.98	3230.89	794.113	1165.36	1773.35	1092.71	2437.23	2159.84		65.8296	615.651	225.904	1610.92	169.476	520.062	1796.41	227.866	269.733		65.8296
66.1507	346.479	1475.72	450.685	261.719	556.041	1525.48	64.8836		66.1507	1296.55	785.219	1327.62	1085.25	628.247	850.329	2104.14	1943.12		66.1507	1127.58	620.411	960.219	178.329	173.932	431.301	685.082	1235.01		66.1507	1696.12	2149.75	803.904	861.767	1680	1099.36	3167.03	1519.11		66.1507	568.137	172.178	1516.14	260.753	446.151	1502.66	304.233	340.712		66.1507
66.4719	341.545	1695.36	535.548	290.678	714.887	1347.17	42.4795		66.4719	1083.63	879.884	1258.26	1094.59	596.818	587.271	1770.25	1565.34		66.4719	1146.23	505.291	1055	154.99	98.6678	239.877	803.452	1154.92		66.4719	1868.37	1958.67	630.914	1144.06	1702.41	1614.75	3997.86	1693.2		66.4719	708.51	181.301	1380.38	356.322	394.062	1488.29	235.182	408.572		66.4719
66.793	511.336	1443.18	435.103	207.315	694.11	1441.08	27.7397		66.793	1197.12	943.507	1756.02	881.836	432.938	666.425	1486.5	1738.2		66.793	1318.32	445.473	896.514	110.993	130.322	362.986	621.281	1293.35		66.793	1636.15	1467.97	764.706	1158.92	1246.75	1830.47	3486.25	1809.58		66.793	782.712	169.39	1541.38	309.24	595.089	897.39	210.815	502.027		66.793
67.1141	297.175	1214.03	561.842	229.678	999.579	1368.8	39.1473		67.1141	1223.29	1225.99	1439.75	642.949	255.442	697.021	1689.1	1627.97		67.1141	889.956	281.342	1039.19	140.545	131.596	290.791	620.699	1178.7		67.1141	1495.32	1373.7	480.158	1243.12	940.685	1568.54	3027.71	1798.13		67.1141	908.486	208.034	1150.2	174.147	386.144	847.332	270.904	304.158		67.1141
67.4352	335.068	1160.34	584.096	208.692	775.233	1479.78	94.1712		67.4352	959.986	1089.03	1119.84	626.986	343.123	520.904	1364.68	2013.25		67.4352	913.384	271.384	771.315	100.26	177.945	507.438	560.027	976.37		67.4352	1590.78	1295.47	582.836	1635.11	1038.15	1501.48	3668.27	1863.04		67.4352	736.178	192.068	1016.34	201.288	299.822	546.411	196.945	270.904		67.4352
67.7563	337.682	1384.51	733.49	202.243	708.182	1880.12	70.4966		67.7563	1132	746.842	1078.95	614.366	284.103	462.226	1397.94	1862.53		67.7563	1010.94	352.527	801.5	106.997	181.572	218.397	602.973	1028.03		67.7563	1265.43	1236.18	690.161	1112.14	1322.18	1593.69	3427.47	1560.24		67.7563	411.798	186.291	1072.48	258.445	285.024	663.089	258.921	185.606		67.7563
68.0775	391.445	1737.15	790.021	333.356	929.253	1846.64	80.3151		68.0775	1066.05	1222.68	1277.47	739.842	312.11	482.747	1172.74	1443.33		68.0775	787.466	309.897	764.26	82.6849	176.384	334.767	728.836	1038.96		68.0775	1241.64	1518.29	791.014	1302.42	1001.77	2152.42	3588.3	1612.14		68.0775	417.781	155.062	1397.73	328.664	293.315	661.438	219.527	259.473		68.0775
68.3986	248.322	1403.52	760.723	197.281	724.113	1588.16	39.5856		68.3986	1103.35	1208.8	1040.22	728.973	330.223	506.983	1456.09	937.123		68.3986	714.089	218.127	752.764	145.925	162.476	219.144	518.791	1121.91		68.3986	1060.33	1835.19	1108.44	981.12	852.49	2379.96	3569.19	1721.14		68.3986	470.233	193.229	1264.29	178.966	226.962	610.192	289.421	270.342		68.3986
68.7197	201.973	1348.79	540.548	115.274	737.096	1174.03	34.6644		68.7197	1157.84	738.096	1040.21	989.466	269.068	577.493	1180.12	1114.42		68.7197	639.521	324.836	654.699	78.6301	133.397	287.507	545.411	903.767		68.7197	1159.63	1721.03	589.753	787.37	1104.11	3003.59	3468.19	1760.49		68.7197	517.493	195.11	1358.47	212.836	255.726	957.26	197.767	295.904		68.7197
69.0408	202.079	1424.51	493.421	119.452	534.243	1004.42	32.0445		69.0408	869.291	630.89	1036.74	886.658	197.962	603.603	1579.4	1276.86		69.0408	883.199	342.373	514.062	75.7021	71.5651	181.219	549.61	1118.83		69.0408	1201.88	1436.47	397.801	857.497	750.048	1698.39	2901.07	1446.26		69.0408	509.729	148.38	1049.84	131.613	222.664	702.072	177.223	264.284		69.0408
69.3619	169.979	1378.25	431.733	141.781	588.822	1031.15	23.1096		69.3619	794.794	698.5	873.349	841.082	227.185	663.781	1512.74	1140.38		69.3619	964.979	405.76	486.021	177.068	139.39	209.911	586.041	1133.08		69.3619	1036.12	1271.03	236.123	934.842	658.014	1279.58	2737.09	1555.27		69.3619	469.062	175.747	840.363	207.048	281.26	688.555	152.466	337.623		69.3619
69.6831	369.065	1159.38	411.26	179.87	722.99	1061.78	22.5856		69.6831	936.969	833.507	871.072	744.976	175.127	620.36	1367.08	960.154		69.6831	956.414	447.086	732.051	188.438	96.9486	189.418	555.702	1119.05		69.6831	1152.67	1434.85	239.798	712.733	842.356	915.068	2284.33	1949.23		69.6831	463.342	93.8082	1040.4	175.894	231.647	452.25	133.589	252.568		69.6831
70.0042	341.507	1051.01	433.877	118.397	695.055	1264.08	37.3973		70.0042	1100.22	961.206	864	842.877	198.562	497.342	1031.78	1234.85		70.0042	664.726	433.89	685.397	106	102.178	181.945	428.137	1127.34		70.0042	1240.36	1182.07	287.027	437.027	861.986	935.877	2429.99	1597.58		70.0042	431.288	100.63	889.425	152.986	195.904	583.315	168.041	314.973		70.0042
70.3253	336.25	1066.25	501.5	175.25	727.25	1106.25	43.75		70.3253	933.75	840	820.25	816.5	143.75	617.25	973.5	764.5		70.3253	633	452	657.5	104.5	110.25	98	477.75	955		70.3253	1710.5	1298.25	269	529.25	879.75	921.75	1822.75	1581.5		70.3253	622.75	88.5	704.75	186.25	159.75	495	236	206		70.3253
70.6464	256.856	1005.62	318.438	196.26	763.658	1000.99	77.5479		70.6464	979.548	683.87	748.26	593.384	100.959	525.904	912.733	426.726		70.6464	747.596	386.966	284.37	106.767	43.9315	51.0274	353.205	940.11		70.6464	1453.05	1295.93	449.966	470.74	865.89	850.233	1641.64	1291.56		70.6464	524.247	31.0685	694.212	325.685	299.075	438.377	195.884	184.562		70.6464
70.9675	193.329	909.329	481.575	254.873	702.702	1056.48	56.0822		70.9675	806.514	628.346	608.589	543.486	124.154	824.452	1118.09	413.325		70.9675	674.264	280.336	427.784	33.6884	53.0103	92.2226	443.428	1008.85		70.9675	1427.3	1047.26	419.11	480.318	678.695	1006.81	1612.02	1581.79		70.9675	565.887	80.1096	688.582	377.979	231.887	400.329	177.113	225.315		70.9675
71.2887	180.89	1162.86	415.096	194.87	694.027	1312.95	38.7466		71.2887	732.877	543.794	593.274	507.603	117.452	446.932	981.945	497.274		71.2887	687.342	323.767	473.932	56.9452	59.1233	98.2055	450.26	705.644		71.2887	1161.49	868.753	353.068	520.356	987.89	1267.63	1777.71	1537.26		71.2887	421.178	65.274	1141.11	214.548	157.945	294.301	208.288	160.466		71.2887
71.6098	223.524	1186.67	261.068	265.483	760.514	1129.59	15.274		71.6098	860.726	683.161	642.709	533.702	131.308	534.298	1050.62	463.295		71.6098	975.521	237.623	567.161	15.7021	144.397	42.7021	622.788	724.062		71.6098	962.784	574.565	234.856	468.87	950.634	1258.92	1450.33	1449.79		71.6098	556.586	70.6849	861.544	170.277	168.034	434.599	185.63	166.791		71.6098
71.9309	331.712	1038.15	530.712	151.767	741.144	1017.99	45.2877		71.9309	824.068	586.349	815.192	546.767	108.795	393.815	917.507	551.103		71.9309	965.822	221.932	341.164	40.0274	83.6849	49.3904	558.411	945.699		71.9309	1123.88	645.664	237.685	404.014	857.945	1292.36	1804.1	1580.62		71.9309	389.726	27.5342	494.452	288.247	219.397	576.582	254.158	227.61		71.9309
72.252	281.336	880.435	682.914	235.551	830.257	793.346	16.9486		72.252	968.671	577.315	819.534	564.527	87.4829	504.158	885.158	414.13		72.252	812.884	335.781	326.479	70	96.8562	53.113	536.329	1119.84		72.252	987.719	770.007	270.366	424.675	1148.2	1472.66	1705.25	1546.2		72.252	336.688	5.08219	442.007	248.366	172.743	381.729	238.979	240.836		72.252
72.5731	286.836	736.781	477.932	231.527	573.603	943.24	34.0548		72.5731	924.794	455.479	663.849	437.767	127.945	396.589	865.753	280.425		72.5731	994.986	376.712	364.74	45.7808	27.9178	106.904	383.808	1224.08		72.5731	978.329	692.219	76.0959	767.74	1257.55	1506.37	1005.05	1662.96		72.5731	242.055	6.0274	471.959	133.096	116.37	361.151	110.342	226.233		72.5731
72.8943	221.49	815.767	453.137	149.805	838.733	960.171	51.3116		72.8943	1062.53	306.514	620.007	421.801	89.8014	234.801	735.592	359.517		72.8943	859.281	271.538	377.394	47.161	197.075	55.5479	470.116	842.445		72.8943	929.199	792.89	240.586	624.377	694.068	1580.74	603.599	1813.86		72.8943	301.14	0	470.336	137.243	122.387	406.007	193.353	238.901		72.8943
73.2154	219.185	702.479	315.445	157.384	833.274	780.726	35.0548		73.2154	922.322	222.144	768.24	372.692	178.836	236.829	875.979	303.829		73.2154	696.568	244.664	527.753	37.6986	100.973	47.6027	295.829	967.89		73.2154	876.726	735.589	260.37	598.281	460.808	1340.75	732.226	1633.47		73.2154	264.021	25.8356	517.247	187.144	72.1712	428.281	197.048	174.986		73.2154
73.5365	186.223	770.49	349.051	114.49	866.49	715.788	32.6644		73.5365	944.637	214.476	601.212	362.62	56.4931	330.925	895.815	316.24		73.5365	669.613	247.425	217.719	34.1986	83.4829	107.568	391.092	1006.72		73.5365	918.979	704.76	389.945	512.956	374.332	1200.32	865.702	1613.15		73.5365	277.979	15.0103	494.469	62.9692	46.1062	287.62	52.8219	265.918		73.5365
73.8576	344.959	689.706	335.452	52.4247	745.014	600.979	26.5479		73.8576	680.781	232.192	341.699	303.932	51.3425	325.014	1148.15	341.411		73.8576	879.877	196.055	352.658	85.6575	59.8082	47.5479	291.507	916.315		73.8576	719.26	533.438	430.575	427.644	433.178	1343.03	755.055	1244.18		73.8576	244.11	0	497.507	62.3425	49.4384	269.26	46	100.205		73.8576
74.1787	173.048	775.387	275.301	54.089	725.476	538.223	13.4486		74.1787	846.866	210.147	499.428	247.798	73.7603	268.014	822.873	340.945		74.1787	672.027	252.545	233.339	15.3425	79.2774	82.0137	294.644	781.521		74.1787	703.462	556.401	249.613	345.305	373.408	857.044	1088.49	853.041		74.1787	410.397	17.7226	556.572	135.13	27.5582	329.483	42.6952	50.6473		74.1787
74.4999	229.767	742.329	278.644	46.3836	796.87	655.082	0		74.4999	723.863	276.671	527.747	257.082	98.5685	400.363	814.658	261.274		74.4999	778.842	321.027	391.507	2.94521	22.1438	4.71233	293.39	620.938		74.4999	748.192	697.062	283.007	377.664	525.39	721.822	1361.14	1043.54		74.4999	406.075	11.7808	517.247	61.3014	56.2877	266.719	45.2603	81.4658		74.4999
74.821	260.336	672.685	198.384	68.1815	771.904	717.733	0		74.821	678.757	260.425	700.312	315.74	160.438	398.771	645.952	226.229		74.821	853.692	475.695	332.216	14.0034	20.387	28.8082	404.798	784.247		74.821	966.627	731.048	221.572	295.274	450.777	997.147	1388.52	746.699		74.821	316.277	3.51027	479.031	138.274	49.1438	340.661	84.8288	75.2569		74.821
75.1421	248.055	780.959	217.849	74.6986	795.562	628.199	0.993151		75.1421	612.877	276.479	650.288	278.767	83.3151	380.562	608.616	211.507		75.1421	923.89	367.247	517.288	12.5753	65.863	8.31507	282.11	746.288		75.1421	838.534	737.644	260.712	293.548	495.932	991.411	562.493	994.493		75.1421	297.137	9.79452	467.904	116.247	37.0411	424.507	73.9041	60.7123		75.1421
75.4632	323.795	665.229	201.096	69.8014	919.829	802.452	3.21918		75.4632	886.733	232.281	562.706	203.668	46.5719	290.627	610.332	398.534		75.4632	939.64	366.39	395.894	23.6473	28.1438	1.82877	345.134	696.658		75.4632	627.397	739.075	245.373	335.911	691.195	916.774	626.983	1106.85		75.4632	115.849	1.82877	422.932	109.418	64.274	205.11	88.9041	84.3356		75.4632
75.7843	306.219	570.877	284.322	18.137	836.349	845.808	0		75.7843	835.794	233.329	516.534	244.815	37.9452	283.281	561.014	494.685		75.7843	914.753	382.116	377.486	18.4589	41.3082	54.8356	382.87	409.644		75.7843	599.479	447.986	271.5	283.705	520.603	879.418	470.301	533.788		75.7843	132.712	0	376.692	115.151	113.178	237.027	56.2945	110.021		75.7843
76.1055	351.866	719.373	192.705	38.1712	784.414	680.325	0		76.1055	764.887	179.805	637.229	315.202	69.339	259.096	502.545	166.959		76.1055	944.531	302.627	369.545	44.5445	58.4144	9.66096	244.524	542.938		76.1055	728.072	462.784	115.479	201.558	716.479	1122.25	651.168	443.065		76.1055	287.777	0.688356	332.195	131.712	39.5856	217.298	38.4555	92.9075		76.1055
76.4266	193.493	574.247	247.986	42.2945	695.411	580.87	0		76.4266	722.781	248.589	459.164	276.466	57.8493	272.247	477.041	241.452		76.4266	638.616	209.562	490.863	13.9178	59.3699	12.3699	218.74	345.575		76.4266	590.521	668.671	94.7123	249.027	601.575	1505.08	636.288	340.904		76.4266	117.712	0	301.466	160.548	55.8904	292.603	38.3288	72.4247		76.4266
76.7477	187.051	452.397	175.267	50.8151	690.151	415.37	0		76.7477	586.832	165.342	575.219	212.716	68	328.459	407.503	420.397		76.7477	794.456	218.021	325.606	10.9041	74.4452	8.59247	330.027	416.973		76.7477	578.733	444.99	98.8596	296.466	583.935	1793.26	441.914	382.562		76.7477	145.096	0	251.027	98.2192	35.9178	200.651	2.72603	109.853		76.7477
77.0688	243.288	352.082	227.932	6.23288	678.267	581.658	0		77.0688	624.021	142.76	427.945	286.281	26.2329	306.733	449.651	355.411		77.0688	693.603	209.089	239.966	37.5822	67.5342	11.5274	350.11	345.781		77.0688	473.226	472.445	39.4178	255.301	560.534	1163.84	364.329	380.973		77.0688	142.747	0	229.26	65.0411	35.6027	183.836	13.8425	44.7808		77.0688
77.3899	105.932	135.096	196.421	87.3322	685.675	517.414	0		77.3899	547.798	200.613	380.466	253.038	91.4692	376.305	466.805	238.514		77.3899	557.555	192.675	193.808	16.0377	26.5171	4.7226	302.747	331.938		77.3899	552.771	421.11	55.5034	271.507	697.935	667.781	345.798	308.5		77.3899	179.418	16.8664	128.781	48.5034	91.8048	158.986	0	9.76027		77.3899
77.7111	123.425	205.13	95.6438	75.3493	714.726	518.336	0		77.7111	355.178	240.863	685.068	249.699	64.6986	248.904	478.356	216.644		77.7111	617.11	136.342	238.589	0.986301	34.2466	17.8904	270.973	278.041		77.7111	524.986	390.562	35.5069	283.151	655.055	603.603	208.384	306.055		77.7111	299.397	0	129.37	82.3425	64.411	187.918	7	26.8082		77.7111
78.0322	114.747	310.637	56.6473	40.7055	811.271	412.144	0		78.0322	370.651	158.747	685.435	248.062	43.3082	278.579	431.192	219.106		78.0322	551.627	83.0753	306.647	36.2534	20.2637	21.3356	288.849	397.555		78.0322	455.723	406.942	52.0479	345.425	336.932	867.404	186.411	307.873		78.0322	241.675	0	94.976	66.0685	90.2979	253.329	21.3219	44.2089		78.0322
78.3533	70.137	340.151	67.7877	25.2466	639.767	431.315	0		78.3533	502.747	88	686.774	284.26	89.8493	184.322	526.815	186.856		78.3533	528.863	168.925	207	0	35.9863	1.32877	267.952	308.781		78.3533	279.753	322.027	68.2945	402.459	312.849	733.055	136.185	270.918		78.3533	256.74	6.37671	105.062	66.4452	45.6781	177.623	6.35616	49.2466		78.3533
78.6744	41.137	251.414	103.815	47.6541	761.75	511.051	0		78.6744	368.798	156.952	456.603	430.976	43.8151	171.949	509.705	162.236		78.6744	528.723	138.815	277.627	21.7637	52.1507	6.60959	328.716	366.774		78.6744	89.0959	313.212	83.2329	359.408	332.096	402.26	90.3185	395.158		78.6744	233.151	13.8801	99.2569	50.8493	20.4897	243.062	51.7123	38.4384		78.6744
78.9955	71.2877	293.699	51.6575	2.52055	719.74	576.514	0		78.9955	532.014	106.534	409.247	288.699	75.6027	129.26	405.342	113.671		78.9955	559.712	93.4795	212.123	2.71233	50.2329	76.9315	227.164	330.712		78.9955	56.7397	286.178	22	454.589	300.521	415.356	178.452	249.137		78.9955	125.534	0	76.9726	37.8082	9.24658	192.534	85.9863	22.7671		78.9955
79.3167	93.2842	270.815	48.8116	18.6884	556.414	461.051	0		79.3167	435.106	129.171	452.452	225.113	66.863	108.271	338.483	164.99		79.3167	606.315	80.6473	187.822	13.0377	36.4281	27.4726	204.021	312.699		79.3167	76.9692	292.226	11.3082	234.014	273.325	452.932	179.291	300.034		79.3167	257.229	0	73.9692	30.9486	6.22603	140.842	3.11301	54.4144		79.3167
79.6378	22.0959	335.37	51.9041	44.2329	646.377	236.096	0		79.6378	552.445	152.527	340.5	183.384	16.4795	102.377	245.438	180.952		79.6378	706.842	171.39	303.658	27.2466	17.411	3.14384	139.315	138.637		79.6378	176.603	284.925	57.7534	259.877	258.644	657.13	442.808	226.048		79.6378	202.945	0	151.486	93.4315	19.5411	158.918	7.33562	38.9384		79.6378
79.9589	41.3493	331.832	49.2979	14.75	512.216	250.716	0		79.9589	343.075	142.055	268.229	206.079	82.8699	76.9452	126.719	149.432		79.9589	457.346	64.0514	437.572	62.7055	79.4863	0	158.041	174.815		79.9589	148.579	320.079	15.1164	213.301	406.668	513.579	322.658	214.565		79.9589	300.086	0	104.579	19.4178	25.8904	95.2295	11.9932	38.1678		79.9589
80.28	25.2329	241.568	19.3151	20.9795	358.808	288.986	0		80.28	299.658	156.205	255.315	206.836	48.3836	130.384	207.438	113.726		80.28	436.055	71.1096	400.178	38.0959	20.0685	0	148.479	141.945		80.28	200.644	193.027	26	181.658	345.932	403.658	249.973	195.849		80.28	415.027	0	106.082	0	13.5342	104.945	0	11.6575		80.28
80.6011	59.8459	306.781	16.0103	2.14041	310.144	306.274	0		80.6011	369.548	159	338.938	162.955	46.5411	155.829	107.336	70.4726		80.6011	270.548	57.3596	492.568	43.6507	10.5616	3.20205	108.223	92.2363		80.6011	225.116	353.072	22.7089	106.202	394.705	270.233	415.291	286.188		80.6011	282.63	0	90.863	7.91096	4.31507	157.938	7.56164	11.1473		80.6011
80.9223	90.1849	283.849	40.6575	20.2192	204.596	392.151	0		80.9223	254.199	155.795	252.336	177.678	68.4315	94.7192	150.733	156.973		80.9223	290.473	62.5274	405.726	59.7329	74.5274	0	141.884	106.233		80.9223	120.932	362.315	57.9315	104.692	418.233	332.466	216.685	298.699		80.9223	252.308	0	75.7534	34.6233	18.0959	88.6233	0	31.7329		80.9223
81.2434	54.4418	238.305	29.7329	26.6096	107.726	222.469	0		81.2434	198.853	141.777	315.421	167.634	38.9931	103.938	141.942	157.582		81.2434	240.024	32.839	402.726	79.5274	19.6712	0	36.4418	120.13		81.2434	211.188	308.048	15.7568	149.188	183.25	325.49	59.4897	334.616		81.2434	253.342	0	95.1473	4.03082	2.53425	80.0445	12.0925	73.7192		81.2434
81.5645	50.3973	404.63	9.24658	44.363	196.26	211.795	0		81.5645	140.329	145.808	247.918	136.932	25.863	51.0685	108.671	82.0137		81.5645	403.041	80.0548	208.808	42.3699	62.9726	0	78.137	170.493		81.5645	130.877	306.055	79.8767	81.274	124.699	234.973	106.397	444.534		81.5645	191.658	0	153.452	0	0	160.795	6.30137	37.9863		81.5645
81.8856	41.3082	389.11	6.89384	3.54795	204.106	225.733	0		81.8856	115.291	227.394	319.277	199.144	42.1199	29.0788	89.226	66.2671		81.8856	260.664	38.1336	254.452	20.1575	0	10.0274	88.3356	132.534		81.8856	99.5616	416.596	3.76027	60.4658	130.01	231.373	115.312	269.986		81.8856	178.065	0	98.7911	15.0411	5.64041	120.466	15.839	51.2637		81.8856
82.2067	38.6507	513.63	0	7.64384	87.0548	141.37	10.5205		82.2067	107.445	232.349	200.603	197.342	67.0959	59.6644	55.9452	72.9589		82.2067	269.719	65.0479	265.603	33.0274	45.7329	0	42.3082	60.8836		82.2067	82.5411	277.548	1.86986	53.2329	97.6096	205.795	16.9863	247.555		82.2067	135.178	0	74.8904	0	0	106.205	21.7534	51.5		82.2067
82.5279	47.4041	435.942	0	0	190.753	172.202	0		82.5279	111.62	309.305	119.26	140.339	74.3904	40.5959	23.5548	107.938		82.5279	255.51	97.0103	234.01	33.024	15.9658	0	35.1301	69.6438		82.5279	78.2226	278.106	26.1062	51.8014	72.2397	261.36	17.3562	294.151		82.5279	50.9658	0	45.9178	0.760274	0	322.288	0	24.3288		82.5279
82.849	13.5616	260.644	50.3836	17.6712	210.068	159.048	0		82.849	229.781	221.795	113.932	133.521	23.6438	52.8219	74.0137	77.3288		82.849	262.137	65.3699	203.822	9.9726	38.411	3.08219	1.53425	74.3699		82.849	185.863	190.918	40.4795	66.8904	56.2466	193.164	14.2329	170.589		82.849	82.5342	0	122.014	0	17.4384	114.397	0	38.6986		82.849
83.1701	13.0616	457.236	0	0	219.908	155.349	0		83.1701	185.404	222.291	117.675	126.12	32.4521	49.1233	40.1986	128.394		83.1701	203.106	15.7397	237.969	54.7774	12.4212	0	33.1541	57.5753		83.1701	187.041	233.298	9.80822	99.0993	48.839	291.158	6.74315	436.298		83.1701	170.408	0	146.75	1.93493	1.93493	138.743	0	42.1644		83.1701
83.4912	0	578.219	0	1.75342	225.637	168.205	0		83.4912	178.363	161.973	117.425	193.534	1	65.0205	16.4589	82.6301		83.4912	163.555	29.3425	148.295	12.4932	0	4.68493	90.7192	30.274		83.4912	215.829	225.5	6.95205	48.3767	24.9932	277.116	21.5822	292.493		83.4912	104.507	0	119.027	12.4932	14.0205	98.6781	0.390411	51.4384		83.4912
83.8123	0	397.925	0	0	129.185	249.531	0		83.8123	266.209	212.332	99.7192	273.955	71.1849	70.5137	37.1473	116.973		83.8123	222.329	27.3664	125.781	56.5205	0	0	65.6575	72.25		83.8123	120.541	187.87	0	95.2808	60.8151	247.455	53.7877	364.596		83.8123	98.7329	0	146.007	0	0	92.6678	44.3596	73.8151		83.8123
84.1335	20.4932	283.699	0	0	140.301	159.788	0		84.1335	122.89	196.123	129.534	86.9315	6.56164	54.2329	59.9726	153.904		84.1335	148.507	21.6986	116.575	16.6849	0	24.2329	14.589	65.4931		84.1335	160.808	249.685	16.6849	71.5069	65.7534	260.904	13.9178	145.082		84.1335	70.8082	0	100.562	7.94521	0	137.932	2.20548	3.57534		84.1335
84.4546	0	166.555	0	0	214.401	145.887	0		84.4546	66.0205	386.719	57.6096	92.5753	0	45.3733	23.3733	36.2363		84.4546	210.538	25.1712	114.986	8.40069	0	39.6062	24.2021	92.274		84.4546	118.017	357.716	0	32.3938	51.1507	196.014	25.7705	174.599		84.4546	112.318	0	77.8014	0	0	106.158	14.3836	10.0171		84.4546
84.7757	18.363	210.918	0	0	148	195.575	0		84.7757	55.363	198.87	109.678	70.9863	0	45.5753	0	100.329		84.7757	165.788	22.0479	167.527	57.1507	0	123.164	47.2808	102.842		84.7757	45.6575	295.021	1.19178	25.3425	58.6164	197.007	27.1712	252.685		84.7757	97.9931	0	57.0411	0	0	165.247	9.44521	11.3219		84.7757
85.0968	0.815068	215.678	0	0	131.784	161.38	0		85.0968	22.4829	192.952	92.8048	20.3699	11.0034	44.411	1.2226	48.0069		85.0968	136.455	6.81507	103.483	38.5582	0	49.2123	11.411	106.295		85.0968	55.1781	206.37	0	22.5582	63.0685	211.644	49.3014	296.914		85.0968	78.9315	0	20.5205	0	0	80.1062	98.3904	0		85.0968
85.4179	0	179.89	0	0	99.8904	107.74	0		85.4179	100.808	238.493	50.9452	41.1096	1.17808	35.9178	0	108.425		85.4179	110.438	0	210.603	58.6849	0	18.0822	35.3425	48.8767		85.4179	4.12329	195.671	0	80.3425	26.6849	308.877	49.5342	252.562		85.4179	68.2329	0	65.5753	20.0685	2.87671	82.0959	69.3973	29.4521		85.4179
85.7391	15.8116	213.541	0	0	68.2329	74.4829	0		85.7391	83.4247	189.818	47.1062	46.6678	9.94521	3.5137	4.09932	57.0342		85.7391	29.4144	2.34247	140.271	85.024	0.828767	45.8014	4.55822	72.4486		85.7391	51.4863	115.144	0	31.2432	14.6404	295.555	13.6747	291		85.7391	55.5582	0	31.2877	0	0	76.1712	0	3.72945		85.7391
86.0602	0	163.781	0	0	127.897	115.781	0		86.0602	57.0411	276.281	52.7877	18.2808	24.3767	0.582192	0	49.7329		86.0602	71.2603	4.65753	80.1301	148.678	0	105.692	0	65.8082		86.0602	9.91096	126.315	0	64.0479	39.5548	122.904	8.58219	324.733		86.0602	229.123	0	25.8356	0	0	68.5069	0	0		86.0602
86.3813	1.68493	198.199	0	0	120.747	135.175	0		86.3813	16.8425	182.003	114.973	60.476	16.0068	34.726	0	11.8425		86.3813	86.0034	14.7397	46.5788	76.9521	0	80.1233	5.63014	82.2705		86.3813	28.9384	149.096	0	65.2705	40.7431	127.675	1.7363	383.788		86.3813	48.0445	0	90.4795	0	0	44.1062	0	0		86.3813
86.7024	0	260.664	0	0	110.082	146.644	0		86.7024	33.6164	168.589	91.1096	19.8767	0.424658	15.8767	0	50.2466		86.7024	91.8219	18.7671	42	93.4247	0	50.6438	0	17.9589		86.7024	5.17808	164.808	0	29.9863	32.6986	78.726	0	275.89		86.7024	87.7397	0	84.2192	0	0	48.6164	0	0		86.7024
87.0235	0	213.038	0	20.4178	106.856	156.325	0		87.0235	4.28425	206.914	142.027	14.2979	34.6747	42.2842	6.86301	22.8733		87.0235	70.1199	14.9829	43.8459	21.1301	0	0	13.5685	106.818		87.0235	34.0137	136.781	1.71233	45.5993	19.137	209.473	17.9795	308.12		87.0235	29.863	0	46.0308	0	0	20.1336	0	0		87.0235
87.3447	0	363.877	0	0	152.781	128.219	0.753425		87.3447	27.2945	201.171	115.048	30.5274	2.15753	18.1918	0	0		87.3447	94.7397	14.7671	21.7877	63.1986	0	0	11.6507	36.5685		87.3447	0	123.37	0	40.4863	22.6644	136.74	8.41096	493.274		87.3447	27.3356	0	45.7877	0	0	70.411	17.863	0		87.3447
87.6658	0	385.185	0	0	194.983	74.8288	0		87.6658	67.4726	220.678	78.476	60.8664	11.476	13.0479	0	34.5171		87.6658	76.4692	0	62.3562	97.4692	0	0	2.82534	44.4418		87.6658	7.34589	110.774	22.1815	12.7363	27.7774	105.205	0	336.223		87.6658	20.6952	0	57.7466	0	0	42.3459	0	0		87.6658
87.9869	0	267.904	16.2329	0	132.11	79.8767	0		87.9869	0	185.151	52.3425	48.7945	33.7534	10.6712	0	39.8767		87.9869	32.6164	16.2877	18.7397	156.342	0	0	16.8082	38.2877		87.9869	5.43836	83.6301	29.3699	20.5753	97.8082	75.6712	0	315.726		87.9869	29.7671	0	2.19178	0	0	11.4521	0	0		87.9869
88.308	0	307.404	1.11644	9.41781	143.997	141.038	0		88.308	22.5308	215.932	113.188	73.1712	18.9795	0	0.441781	14.2568		88.308	26.7466	0	56.1849	101.068	0	0	13.2568	34.6952		88.308	47.5822	35.0034	0	40.3048	31.6027	68.6918	0	138.723		88.308	0.883562	0	6.69863	0	0	121.466	0	0		88.308
88.6291	0	448.233	0	0	139.425	139.452	0		88.6291	3.11644	197.493	80.3151	56.863	4.45205	0	0	39.0274		88.6291	50.5479	0	80.3767	0	0	0	0	110.322		88.6291	22.2603	50.6507	17.1986	6.33562	23.2055	109.507	0	114.075		88.6291	40.0205	0	25.9863	0	0	31.0685	0	2.22603		88.6291
88.9503	0	411.791	3.85959	4.74315	153.904	119.332	0		88.9503	6.93493	234.877	36.2534	18.9247	0	0	0	32.1199		88.9503	15.113	0	51.5685	13.4589	0	13.0103	3.58904	77.0205		88.9503	36.5342	11.7945	0	56.2397	26.8219	69.113	0	65.7466		88.9503	13.2329	0	0	0	0	39.5069	15.9897	0		88.9503
89.2714	0	370.014	0	0	170.466	115.527	40.9384		89.2714	0.452055	228.438	42.3425	28.8219	0	0	0	44.3699		89.2714	13.2329	14.411	45.7534	0	0	0	7.23288	25.3562		89.2714	3.61644	63.6575	8.58904	17.0274	20.8219	111.274	8.76712	111.096		89.2714	5.47945	0	28.4795	2.71233	0	57.8082	0	0		89.2714
89.5925	0	388.884	1.08904	0	84.3699	120.24	20.0651		89.5925	0	308.726	3.18836	39.9315	11.9795	1.08904	0	52.9007		89.5925	39.8836	16.8527	19.6027	0	0	0	24.3664	16.8801		89.5925	6.83219	79.9007	0	17.4247	24.5034	71.5925	15.0308	77.5651		89.5925	16.8801	0	9.44521	0	0	5.98973	0	0		89.5925
89.9136	0	372.658	0	0	45.8904	62.7123	0		89.9136	1.62329	205.966	8.71918	21.6438	0	0	2.16438	17.8973		89.9136	2.62329	1.62329	11.589	0	0	0	0	20.8699		89.9136	0	84.7877	0	28.5274	0	97.5959	0	100.747		89.9136	0	0	5.96575	5.04795	0	33.1507	0	0		89.9136
90.2347	0	321.271	3.22603	0	13.4075	21.7329	0		90.2347	20.4315	311.5	18.2466	48.7979	0	52.8596	12.0205	88.2397		90.2347	37.839	0	10.613	0	0	0	0	10.0753		90.2347	10.1712	88.1747	3.69863	34.7192	0	29.5479	0	35.4931		90.2347	0	0	0	0	0	18.0308	0	0		90.2347
90.5559	0	371.329	0	0	50.5616	69.3767	0		90.5559	0	194.164	20.1644	4.27397	0	34.9315	2.13699	37.1918		90.5559	135.205	0	22.4932	0	0	0	0	50.6849		90.5559	5.46575	46.274	3.26027	19.2329	0.465753	87.2192	8.54795	70.6986		90.5559	0	0	11.1781	0	0	65.6438	0	0		90.5559
90.877	0	355.01	0	0	17.8288	213.394	0		90.877	4.7774	236.014	27.3699	11.7295	0	0	0	44.0856		90.877	255.329	0	1.40753	0	0	0	0	14.3699		90.877	19.7911	49.1575	0	10.7911	0	36.8151	0	9.55479		90.877	0	0	16.6541	0	0	74.2671	0	0		90.877
91.1981	0	235.959	0	0	0	202.329	0		91.1981	0	277.877	14.2397	12.1301	0	8.03425	0.945205	28.9247		91.1981	14.1781	0	6.25342	0	0	0	0	44.774		91.1981	3.69178	50.7329	3.78082	0	0	73.2671	0	13.1849		91.1981	8.97945	0	29.3014	0	19.8493	30.726	0	0		91.1981
91.5192	0	355.729	0	0	25.7671	84.2158	0		91.5192	0	295.247	35.2431	9.52055	0	0	0	10.9486		91.5192	18.089	0	19.387	0	0	0	0	22.0925		91.5192	0	56.7089	0	3.80822	11.8596	65.5651	0	0		91.5192	13.6233	0	13.476	0	0	0	0	0		91.5192
91.8403	0	219.466	0	12.7329	0	107.562	0		91.8403	0	380.123	19.9178	0	0	7.28767	0	39.9178		91.8403	0	0	12.4932	0	0	0	21.5753	24.0822		91.8403	0	100.616	0	20.3014	8.32877	78.2329	0	0		91.8403	0	0	19.2466	0	0	13.274	9.10959	0		91.8403
92.1615	0	296.863	0	0	2.06849	337.137	0		92.1615	0	529.158	49.5445	5.61986	0	0	0	22.1712		92.1615	0	0	3.61986	0	0	0	0	25.6164		92.1615	15.9349	57.3425	0	24.8219	40.5616	62.2089	0	3.86301		92.1615	0.965753	0	30.9041	0	0	0	0	0		92.1615
92.4826	0	111.616	0	0	10.5685	140.123	0		92.4826	0	422.781	0	40.1849	0	2.43151	20.9795	24.1438		92.4826	30.1507	0	0	0	0	0	3.59589	36.3767		92.4826	0	63.2123	0	8.26712	65.226	79.9315	0	17.9932		92.4826	0	0	0	0	0	20.5479	0	0		92.4826
92.8037	0	171.979	0	0	0	221.818	0		92.8037	0	453.736	9.89726	4.44863	0	6.36644	0	23		92.8037	4.08219	0	0	0	0	0	19.6952	98.0205		92.8037	0	39.0856	0	56.8836	0	146.935	0	8.16438		92.8037	0	0	0	0	0	30.6301	0	0		92.8037
93.1248	0	187.363	0	0	44.0959	134.863	0		93.1248	0	488.178	0	18.2466	0	2.0274	13.3151	18.2466		93.1248	0	0	0.493151	0	0	0	0	0		93.1248	0	34.2877	0	0	37.4795	190.644	9.36986	20.2192		93.1248	1.0137	0	0	0	0	0	0	0		93.1248
93.4459	0	153.024	0	0	94.9486	194.123	0		93.4459	0	380.541	0	1.00685	0	12.0822	66.411	30.2055		93.4459	0	0	0	0	0	0	0	0		93.4459	0	64.9931	10.4966	0	2.97945	351.202	0	0		93.4459	2.97945	0	4.96575	0	0	0.496575	0	0		93.4459
93.7671	0	256	0	0	34	352	0		93.7671	0	336.5	0	1	0	0.5	0	8.5		93.7671	0	0	8.5	0	0	0	0	7.5		93.7671	0	42	0	22.5	2	141	0	0		93.7671	0	0	20.5	0	0	3	0	0		93.7671
[truncated: 8 more columns]

## Sheet: Fig5G
Col-0_Mock	hec1,2,3_Mock	Col-0_BA	hec1,2,3_BA
76.5778	66.4384	85.9394	90.899
80.4485	67.3535	84.3798	92.4727
78.8485	74.3778	95.4242	82.0323
72.3172	75.4646	95.7455	79.8465
72.6343	69.1737	93.0242	89.7879
85.3939	77.4343	97.2485	95.6263
74.4869	72.6869	85.7778	84.0828
68.9515	67.4081	98.0545	87.604
77.7495	76.7758	93.2949	83.7515
80.9636	73.8	91.4222	92.3677
82.1879	64.6182	88.9051	93.6222
78.5657	67.5152	89.798	96.5576
85.6061	70.3596	90.5253	81.4101
66.4263	77.6768	88.6364	84.2081
	74.9556
	71.5596

## Sheet: Fig5H
WT	hec1,2,3	ahp6	hec1,2,3 x ahp6
81.103	74.2687	89.5778	83.6242
77.8465	72.3899	93.5071	86.1535
86.5899	70.4747	96.5798	92.2424
82.0929	73.4485	93.4687	80.7313
88.396	71.4828	93.0121	90.699
75.5737	79.3434	94.7212	83.2162
79.5253	77.7111	90.802	79.604
77.998	79.6828	88.6	83.501
85.4323	72.8545	93.4202	91.8646
85.8323	75.6545	92.2808	73.6162
86.0707	83.3899	84.9778	81.8869
89.998	73.499	89.8505	89.7253
88.6444	74.3737	95.4586	85.6566
81.802	79.7697	98.3394	84.8869
85.1455	68.4081	98.0929	94.3838
81.9111		95.7455	92.7758
