# Supplementary material for: Control of plant cell fate transitions by transcriptional and hormonal signals
Source: eLife journal article supplement (doi:10.7554/elife.30135), 2017-10-23
Supplement: supp [file elife-30135-supp-v1.zip › elife_poa_e30135_Figure_6_source_data_1.xlsx]

## Sheet: Fig6C
Quantification auxin maxima SAM
pCUC2:HEC1-linker-GR
	Mock_Day1	Dex_Day1	Mock_Day2	Dex_Day2	Mock_Day3	Dex_Day3
	5	4	4	2	5	2
	5	5	4	3	5	2
	6	3	5	3	5	3
	6	4	5	3	5	2
	5	3	5	2	4	2
	5	4	4	3	5	2
	5	3	5	2	5	1
	5	4	5	2	5	3
		4		3		2
Average	5.25	3.77778	4.625	2.55556	4.875	2.11111
SD	0.46291	0.666667	0.517549	0.527046	0.353553	0.600925
