# Supplementary material for: Control of plant cell fate transitions by transcriptional and hormonal signals
Source: eLife journal article supplement (doi:10.7554/elife.30135), 2017-10-23
Supplement: supp [file elife-30135-supp-v1.zip › elife_poa_e30135_Figure_6_source_data_2.xlsx]

## Sheet: Fig6_sup2C
Quantification number of auxin maxima
p16:HEC1-linker-GR
	Mock_day1	Dex_day1	Mock_day2	Dex_day2	Mock_day3	Dex_day3
	5	4	6	2	5	3
	6	3	5	2	5	2
	5	5	4	3	6	1
	6	4	5	3	5	2
		4		4		2
		3
		4
Mean	5.5	3.85714	5	2.8	5.25	2
SD	0.57735	0.690066	0.816497	0.83666	0.5	0.707107

## Sheet: Fig6_sup3A
Root Expression data Li & al 2016
	APL	CO2	COBL9	COR	E30	GL2	PET111	S17	S18	S32	S4	SCOL	SCR	WER	WOL	WOX5	Elong	Mat	Mer	Wrt	CHX	MOCK
HEC1: AT5G67060.1	0.073157	0.0404347	0	0.084713	0.0451613	0.0302642	0	0.591035	0	0.169018	0.602893	0	0	0.0839997	0	0	0.0118083	0	0.0225209	0.485547	0.223527	0.275894
HEC2: AT3G50330.1	0	0.048227	0	0.0867283	0.0531357	0	0	0	0.308574	0.066632	0.0298702	0	0	0	0.0343533	0.0495573	0.0167435	0	0	0.0470013	0.0698874	0
HEC3: AT5G09750.1	0	0	0.115736	0.136813	1.84587	0	0	0	0	0	0	0	0.087867	0	0.060805	0	0.162074	1.0125	0	0.2636	0.175149	0.128968
SHR: AT4G37650.1	9.26036	1.80853	0.255982	0.494789	6.44022	0.226132	7.81878	25.9668	6.46696	53.4213	130.198	12.4719	11.1498	0.225852	40.6091	23.1017	20.9915	10.9019	20.5909	20.5366	6.78119	9.74164

## Sheet: Fig6_sup3G
RAM size measurement p16:HEC1-linker-GR
Day1	Size (µm)			Size (µm)
Mock#1	248.58		Dex #1	240.61
Mock#2	297.63		Dex #2	185.92
Mock#3	238.4		Dex #3	166.28
Mock#4	252.61		Dex #4	241.82
Mock#5	229.09		Dex #5	205.01
Mock#6	242.62		Dex #6	232.53
Mock#7	226.61		Dex #7	224.55
Mock#8	349.51		Dex #8	184.02
Mock#9	298.59		Dex #9	210.07
Mock#10	259.48		Dex #10	240.73
Mock#11	264.52		Dex #11	213.69
Mock#12	306.23		Dex #12	279.04
Mock#13	289.6		Dex #13	218.04
Mock#14	319.21		Dex #14	214.15
Mock#15	297.25		Dex #16	283.74
Mock#16	301.14		Dex #17	278.69
Mock#17	260.03		Dex #18	258.85
Mock#18	267.17		Dex #19	217.09
Mock#19	289.93
Mean	275.695			227.491
SD	33.1899			33.2125
Day2	Size (µm)			Size (µm)
Mock#1	329.79		Dex #1	222.14
Mock#2	283.34		Dex #2	215.64
Mock#3	279.97		Dex #3	200.27
Mock#4	272.39		Dex #4	213.12
Mock#5	257.86		Dex #5	242.42
Mock#6	308.69		Dex #6	295.11
Mock#7	282.81		Dex #7	255.2
Mock#8	305.56		Dex #8	298.84
Mock#9	263.38		Dex #9	237.55
Mock#10	325.51		Dex #10	295.94
Mock#11	321.44		Dex #11	245.06
Mock#12	317.96		Dex #12	248.14
Mock#13	332.44		Dex #13	267.69
Mock#14	325.87		Dex #14	200.77
Mock#15	373.09		Dex #15	232.05
Mock#16	353.25		Dex #16	186.55
Mock#17	307.19		Dex #17	175.99
Mock#18	307.13		Dex #18	281.8
			Dex #19	194.09
			Dex #20	191.94
			Dex #21	187.39
Mean	308.204			232.748
SD	30.7462			38.9409

## Sheet: Fig6_sup3H
Quantification cortex cell number p16:HEC1-linker-GR
Mock_D1_#1	31		Dex_D1_#1	32
Mock_D1_#2	29		Dex_D1_#2	23
Mock_D1_#3	29		Dex_D1_#3	22
Mock_D1_#4	29		Dex_D1_#4	27
Mock_D1_#5	28		Dex_D1_#5	22
Mock_D1_#6	34		Dex_D1_#6	27
Mock_D1_#7	24		Dex_D1_#7	29
Mock_D1_#8	41		Dex_D1_#8	20
Mock_D1_#9	33		Dex_D1_#9	29
Mock_D1_#10	31		Dex_D1_#10	30
Mock_D1_#11	30		Dex_D1_#11	28
Mock_D1_#12	37		Dex_D1_#12	30
Mock_D1_#13	33		Dex_D1_#13	24
Mock_D1_#14	33		Dex_D1_#14	26
Mock_D1_#15	33		Dex_D1_#16	31
Mock_D1_#16	31		Dex_D1_#17	36
Mock_D1_#17	29		Dex_D1_#18	30
Mock_D1_#18	28		Dex_D1_#19	25
Mock_D1_#19	30
Mean	31.2105			27.2778
SD	3.69051			4.09886
Mock_D2_#1	39		Dex_D2_#1	22
Mock_D2_#2	31		Dex_D2_#2	24
Mock_D2_#3	31		Dex_D2_#3	24
Mock_D2_#4	34		Dex_D2_#4	25
Mock_D2_#5	35		Dex_D2_#5	28
Mock_D2_#6	33		Dex_D2_#6	26
Mock_D2_#7	31		Dex_D2_#7	32
Mock_D2_#8	36		Dex_D2_#8	32
Mock_D2_#9	33		Dex_D2_#9	25
Mock_D2_#10	44		Dex_D2_#10	34
Mock_D2_#11	35		Dex_D2_#11	27
Mock_D2_#12	37		Dex_D2_#12	27
Mock_D2_#13	43		Dex_D2_#13	27
Mock_D2_#14	38		Dex_D2_#14	24
Mock_D2_#15	41		Dex_D2_#15	28
Mock_D2_#16	40		Dex_D2_#16	23
Mock_D2_#17	38		Dex_D2_#17	22
Mock_D2_#18	33		Dex_D2_#18	28
			Dex_D2_#19	24
			Dex_D2_#20	20
			Dex_D2_#21	25
Mean	36.2222			26.0476
SD	4.05195			3.51392

## Sheet: Fig6_sup3J
Cortex cell lenght measurement p16:HEC1-linker-GR
DAY2
Position cell	Mock
	#2	#3	#4	#5	#6	#8	#10	#11	#13	#15	#17	Average cell size	Cumulative sum
1	12.943	5.305	7.817	7.763	10.672	8.52	7.498	8.261	5.761	7.89	7.119	8.14082	17.2758
2	13.011	6.938	6.166	8.512	11.158	11.92	9.782	9.772	6.691	8.542	7.993	9.135	26.5074
3	13.837	8.983	6.027	8.373	9.585	9.352	6.375	11.084	11.438	9.356	7.137	9.23155	33.8952
4	7.044	8.819	6.198	8.014	8.52	7.641	6.408	5.614	7.33	8.382	7.296	7.38782	41.1572
5	7.232	6.738	8.683	6.76	5.486	10.339	6.958	5.176	6.746	8.195	7.569	7.262	48.2154
6	10.042	6.259	7.572	6.269	5.255	8.954	7.09	6.202	5.653	7.723	6.621	7.05818	55.1868
7	9.049	8	5.001	5.578	9.56	9.105	6.998	6.399	5.77	5.438	5.788	6.97145	62.2195
8	9.24	6.88	5.034	5.768	10.711	8.597	5.614	6.202	7.289	6.183	5.841	7.03264	69.3064
9	9.816	7.628	9.644	7.149	9.151	4.686	6.988	5.614	5.233	6.241	5.806	7.08691	75.3513
10	7.362	6.399	5.574	7.008	6.05	5.136	5.646	5.542	6.638	4.387	6.752	6.04491	81.7863
11	6.34	8.48	5.985	6.148	5.973	5.146	5.628	5.75	6.461	6.838	8.036	6.435	87.9775
12	6.558	8.211	6.099	6.39	6.544	3.82	5.584	6.183	5.075	6.084	7.556	6.19127	94.2671
13	4.951	7.248	6.56	8.686	6.838	8.336	4.262	4.39	5.841	5.644	6.429	6.28955	100.269
14	6.076	6.549	5.954	7.474	5.572	7.409	5.204	5.467	4.031	5.85	6.431	6.00155	106.467
15	6.689	7.353	6.138	8.439	6.001	4.422	7.455	6.208	4.512	4.686	6.276	6.19809	112.565
16	6.503	6.888	5.936	7.595	5.614	3.406	6.461	5.826	7.248	5.653	5.947	6.09791	119.164
17	6.401	7.839	6.025	9.402	5.7	7.197	5.37	5.467	6.978	6.084	6.126	6.599	125.844
18	8.84	7.715	6.146	8.921	7.05	4.457	6.243	6.691	6.126	5.343	5.947	6.67991	132.276
19	9.323	8.559	5.338	9.162	6.544	4.835	6.62	6.469	4.503	5.388	4.018	6.43264	138.432
20	7.061	8.686	5.566	8.682	6.358	4.457	4.995	7.002	5.326	5.082	4.5	6.15591	145.019
21	9.363	7.716	5.185	10.734	6.252	4.628	6.124	5.535	7.569	4.526	4.824	6.58691	151.662
22	7.624	7.85	5.936	10.247	6.041	9.792	4.979	6.26	4.351	4.835	5.153	6.64255	159.429
23	6.956	7.97	6.252	10.369	6.866	11.136	8.421	6.978	4.985	6.005	9.504	7.76745	168.014
24	8.542	8.558	6.099	10.49	14.336	8.992	8.732	5.761	7.741	5.542	9.645	8.58527	175.983
25	7.89	9.164	6.519	10.137	10.93	9.252	4.681	7.197	5.966	5.467	10.448	7.96827	184.823
26	11.195	8.08	7.477	9.77	12.81	9.351	4.917	12.451	5.146	5.438	10.612	8.84064	193.911
Position cell	Dex
	#4	#5	#7	#9	#10	#11	#15	#16	#18	#19	#21	Average cell size	Cumulative sum
1	14.912	10.4	6.853	9.488	7.427	10.411	7.446	9.649	8.229	8.851	4.852	8.95618	17.36
2	9.769	5.93	6.478	9.312	7.763	4.964	12.222	8.841	11.238	9.227	6.698	8.40382	25.0816
3	8.086	5.566	4.631	9.834	9.601	4.749	9.078	5.592	11.402	7.168	9.231	7.72164	32.2291
4	9.19	10.14	4.217	7.535	8.014	3.991	7.192	5.063	8.732	7.168	7.38	7.14745	39.9294
5	7.73	8.732	4.426	6.527	12.184	6.585	8.369	9.24	7.959	5.91	7.041	7.70027	46.4881
6	5.326	5.114	4.755	6.31	7.703	6.954	6.767	7.73	7.248	8.285	5.954	6.55873	52.7778
7	4.162	5.391	6.793	5.786	7.09	6.755	6.789	6.767	8.923	5.265	5.466	6.28973	59.1272
8	6.514	7.897	5.55	5.304	5.628	7.489	4.637	7.232	8.762	5.866	4.964	6.34936	65.7769
9	5.114	5.566	9.92	6.514	4.399	7.168	4.606	7.97	8.679	9.001	4.21	6.64973	72.1743
10	4.876	6.342	5.503	7.775	4.876	5.353	7.748	5.566	8.441	8.732	5.159	6.39736	78.0062
11	5.806	5.791	4.852	4.581	5.592	6.365	7.715	7.268	4.346	6.767	5.068	5.83191	84.4423
12	6.509	5.309	6.268	5.309	8.933	6.703	6.789	6.755	4.828	7.508	5.886	6.43609	91.0307
13	8.211	8.682	4.755	5.309	7.508	7.624	5.086	6.287	4.587	8.709	5.715	6.58845	97.92
14	11.333	6.509	4.272	6.819	9.99	7.959	3.134	7.232	5.114	9.315	4.105	6.88927	104.458
15	7.268	5.55	5.623	6.046	7.97	6.895	4.105	8.285	8.438	6.046	5.69	6.53782	111.898
16	8.493	7.268	4.217	8.692	8.014	9.981	4.581	10.125	8.2	6.767	5.503	7.44009	118.999
17	5.309	6.032	4.749	10.125	5.786	7.029	9.174	8.253	9.884	6.273	5.497	7.101	126.333
18	8.933	5.391	3.68	9.164	7.224	9.754	7.236	6.514	8.679	8.682	5.418	7.33409	133.909
19	7.236	5.806	6.58	12.573	6.789	5.886	6.75	8.972	9.887	6.767	6.085	7.57555	142.835
20	8.452	6.527	4.346	10.355	7.139	10.467	10.137	12.114	11.341	9.415	7.897	8.92636	153.017
21	8.197	7.97	3.954	17.159	9.884	10.958	9.655	18.16	7.474	11.582	7.008	10.1819	164.159
22	11.341	12.814	5.159	14.297	5.806	7.908	7.73	25.532	7.029	10.392	14.555	11.1421	177.142
23	12.594	9.884	8.625	15.446	7.988	8.923	9.405	22.426	13.742	11.354	22.43	12.9834	192.396
24	12.834	8.692	6.908	25.583	12.316	11.04	13.021	31.257	12.78	18.348	15.011	15.2536	210.597
25	9.834	10.619	9.164	47.186	10.632	12.64	11.815	20.292	12.295	22.467	33.27	18.2013	236.654
26	23.563	15.928	12.723	63.154	7.236	23.724	14.016	32.688	21.505	20.527	51.557	26.0565	264.607
