# Supplementary material for: Control of plant cell fate transitions by transcriptional and hormonal signals
Source: eLife journal article supplement (doi:10.7554/elife.30135), 2017-10-23
Supplement: supp [file elife-30135-supp-v1.zip › elife_poa_e30135_Figure_7_source_data_1.xlsx]

## Sheet: Fig7_sup1G-I
Calculation ARE_G-box enrichments
Data set	ARE	no_ARE	G-Box	no_G-box	ARE + G-box	no ARE +G-Box	Total_Open chromatin_flower
mock_vs_dex pval <0,05	199	479	208	470	83	595	678
cyc-mock_vs_cyc-dex	237	591	292	536	108	720	828
total	5109	17308	6024	16393	1913	20504	22417
	ARE	G-Box	ARE + G-box
mock_vs_dex pval <0,05	29.351	30.6785	12.2419
cyc-mock_vs_cyc-dex	28.6232	35.2657	13.0435
total	22.7907	26.8725	8.5337
