# Supplementary material for: Control of plant cell fate transitions by transcriptional and hormonal signals
Source: eLife journal article supplement (doi:10.7554/elife.30135), 2017-10-23
Supplement: supp [file elife-30135-supp-v1.zip › elife_poa_e30135_Figure_9_source_data_1.xlsx]

## Sheet: Fig9A
qRT-PCR
MP	M/M	M/D	N/M	N/D
delta Cq	0.198196	0.122004	0.163799	0.158769
	0.189465	0.104748	0.190782	0.12807
	0.159873	0.111491	0.196146	0.144586
Mean	0.182511	0.112748	0.183576	0.143808
SD	0.0200853	0.00869617	0.0173358	0.0153644
Normalized_mean	1	0.617758	1.00583	0.787941
SD	0.11005	0.0476473	0.0949849	0.0841833

## Sheet: Fig9B
qRT-PCR
SPT	M/M	M/D	N/M	N/D
delta Cq	0.0482498	0.07966	0.0780207	0.148995
	0.0708052	0.0853775	0.0741539	0.101063
	0.060371	0.0669858	0.0805856	0.114758
Mean	0.0598087	0.0773411	0.0775867	0.121605
SD	0.0112882	0.00941257	0.00323775	0.0246884
Normalized	1	1.29314	1.29725	2.03324
SD	0.188739	0.157378	0.0541351	0.41279

## Sheet: Fig9I
Quantification primordia number
pCUC2:HEC1-linker-GR
Day1	Mock/Mock	Mock/Dex	NAA/Mock	NAA/Dex
	4	3	5	3
	4	3	4	3
	5	4	4	4
	3	4	4	4
	4	3	3	5
Average	4	3.4	4	3.8
SD	0.707107	0.547723	0.707107	0.83666
Day2	4	4	3	4
	4	2	4	3
	5	2	4	4
	4	3	4	4
	4	3	4	3
Average	4.2	2.8	3.8	3.6
SD	0.447214	0.83666	0.447214	0.547723
Day3	4	3	5	4
	4	3	4	3
	4	1	4	3
	3	1	4	3
	4	2	3	4
Average	3.8	2	4	3.4
SD	0.447214	1	0.707107	0.547723
Day4	4	1	5	4
	3	0	4	4
	3	0	4	4
	3	1	3	4
	4	1	5	3
Average	3.4	0.6	4.2	3.8
SD	0.547723	0.547723	0.83666	0.447214

## Sheet: Fig9J
Quantification primordia number
p16:HEC1-linker-GR
Day1	Mock/Mock	Mock/Dex	NAA/Mock	NAA/Dex
	5	3	4	3
	4	4	4	5
	4	4	5	4
	5	3	4	3
	4	4	5	3
Average	4.4	3.6	4.4	3.6
SD	0.547723	0.547723	0.547723	0.894427
Day2	4	3	4	4
	4	3	5	4
	4	2	4	4
	4	3	4	3
	4	3	4	4
Average	4	2.8	4.2	3.8
SD	0	0.447214	0.447214	0.447214
Day3	4	3	4	3
	4	0	3	3
	4	3	4	4
	4	1	3	4
	4	0	4	4
Average	4	1.4	3.6	3.6
SD	0	1.51658	0.547723	0.547723
Day4	4	1	3	4
	3	3	5	3
	4	1	4	4
	4	0	4	3
	4	1	3	4
Average	3.8	1.2	3.8	3.6
SD	0.447214	1.09545	0.83666	0.547723
