# Supplementary material for: Control of plant cell fate transitions by transcriptional and hormonal signals
Source: eLife journal article supplement (doi:10.7554/elife.30135), 2017-10-23
Supplement: supp [file elife-30135-supp-v1.zip › elife_poa_e30135_Figure_10_source_data_1.xlsx]

## Sheet: Fig10E
Col-0_NL	Col-0_LL	hec1,2,3_NL	hec1,2,3_LL
77.0162	63.5495	73.0687	82.3576
68.6687	68.5212	62.9576	76.5172
76.8222	70.7192	65.4768	73.4323
69.499	65.2162	71.4586	86.0121
73.8566	70.1394	66.9677	64.1657
68.6323	73.0586	66.6384	73.7677
76.9212	66.7455	67.0869	80.4141
68.4626	67.4222	74.7232	68.4182
71.9111	56.2909	67.6828	75.0081
70.5879	52.7939	63.0263	76.6444
69.6283	64.0566	62.2485	60.3495
76.3071	54.2808	62.8828	60.4303
76.3636	47.2424	65.0909	36.9293
77.1939	46.1111	61.6949	76.3232
76.1051	54.1354		75.3515
	47.3434		39.297

## Sheet: Fig10J
Intensity plot profiles pTCSn:erGFP, different light regimes
Normal light												Normal light								Low Light									Low light
Distance	TCSn_#1	TCSn_#3	TCSn_#5	TCSn_#7	TCSn_#8	TCSn_#9	TCSn_#10	TCSn_#11	TCSn_#12	TCSn_#13		Distance	hec123_#1	hec123_#2	hec123_#3	hec123_#4	hec123_#5	hec123_#6		Distance	TCSn_#1	TCSn_#2	TCSn_#5	TCSn_#6	TCSn_#7	TCSn_#8	TCSn_#9		Distance	hec123_#1	hec123_#2	hec123_#3	hec123_#4	hec123_#5
0	264	392.25	424.25	233	741.75	373.25	275	416.75	299	233.75		0	322	484.25	344	420	344.75	326		0	371	444	320	487	289	297	184		0	320	171	245	227	273
0.3211	268.232	376.542	390.555	279.407	849.813	376.987	258.284	401.277	301.736	250.471		0.3211	310.271	544.646	358.471	396.774	343.258	330.497		0.3211	403	424	304	494	268	285	191		0.3211	303	190	255	260	263
0.6422	282.202	350.584	384.987	324.618	938.743	390.202	247.773	405.961	324.163	260.974		0.6422	312.974	581.91	370.468	398.227	333.039	326.519		0.6422	423	405	309	477	243	264	207		0.6422	303	217	272	243	246
0.9634	296.432	352.197	394.942	339.471	960.49	395.49	258.668	394.096	359.317	258.529		0.9634	320.216	595.707	364.803	398.51	327.764	332.452		0.9634	401	411	320	471	243	271	236		0.9634	313	229	300	229	257
1.2845	311.154	371.359	416.589	338.769	968.436	386.334	278.615	365.206	380.154	254.026		1.2845	314.564	594.282	356.051	391.308	333.692	334.256		1.2845	366	439	298	491	272	309	248		1.2845	312	223	303	235	284
1.6056	320.936	373.29	460.098	323.903	1002.16	365.935	290.678	362.194	382.516	254.484		1.6056	305.322	572.967	364.387	371.935	337.484	315.451		1.6056	355	425	291	541	288	340	233		1.6056	320	226	297	217	301
1.9267	343.73	363.856	478.182	296.049	1050.76	340.751	304.105	375.105	378.298	248.337		1.9267	298.558	560.077	387.99	341.568	332.077	297.154		1.9267	361	395	333	592	281	344	230		1.9267	334	232	285	174	302
2.2478	387.937	349.919	451.928	274.703	1076.56	321.441	320.559	373.09	385.865	238.613		2.2478	295.523	570.559	406.081	321.18	330	298.171		2.2478	366	400	381	579	264	335	225		2.2478	326	227	256	149	300
2.569	397.314	346	433.154	272.211	1071.42	316.263	331.634	353.309	410.377	245.583		2.569	288.366	567.629	396.732	328.794	318.206	325.8		2.569	381	407	397	566	264	328	186		2.569	302	233	225	140	299
2.8901	355.546	359.975	438.091	276.678	1073.15	346.157	322.967	338.174	429.768	261.504		2.8901	277.909	530.43	379.496	353.595	306.645	348.24		2.8901	402	422	409	555	291	315	168		2.8901	290	245	203	140	283
3.2112	313.111	373.807	445.404	283.871	1075	382.687	305.789	322.523	417.854	269.67		3.2112	283.807	497.45	375.734	377.88	304.734	336.12		3.2112	389	449	449	543	303	303	188		3.2112	286	243	199	146	256
3.5323	289.818	382.126	447	301.379	1055.96	370.031	301	295.298	390.031	270.268		3.5323	292.126	492.929	389.182	386.197	299.141	317.551		3.5323	389	437	456	584	285	303	200		3.5323	292	246	217	151	235
3.8534	298.153	389.115	449.192	317.23	1054.12	338.617	311.961	274.578	395.883	288.998		3.8534	294	496.192	417.383	390.654	292.616	318.115		3.8534	441	419	406	647	271	301	203		3.8534	315	256	231	161	241
4.1746	319.769	402.666	472.602	310.793	1050.9	329.271	333.498	280.207	433.08	312.04		4.1746	307.853	537.83	438.395	401.478	292.458	327.291		4.1746	485	422	379	681	269	305	210		4.1746	328	278	240	161	267
4.4957	320.18	420.822	497.005	302.635	1012.62	333.365	354.55	301.46	461.005	302.723		4.4957	340.645	611.927	452.457	396.998	295.182	315.45		4.4957	488	429	388	702	272	330	227		4.4957	332	319	246	152	281
4.8168	315.096	426	490.66	295.919	983.756	345.888	366.533	315.985	482.244	314.421		4.8168	369.147	665.939	476.325	374.401	311.244	294.756		4.8168	467	427	384	705	282	359	246		4.8168	338	323	247	151	271
5.1379	321.967	423.827	479.482	284.584	948.305	364.486	358.86	331.313	518.42	365.181		5.1379	383.967	710.592	478.206	368.449	341.625	297.691		5.1379	449	417	343	700	296	363	265		5.1379	347	286	248	138	258
5.459	321.387	426.613	502.293	284.613	890.027	388.067	351.387	341.059	557.461	367.547		5.459	398.563	717.219	452.152	386.344	366.176	324.848		5.459	480	426	306	702	308	350	296		5.459	336	254	252	130	260
5.7802	319.279	442.421	550.937	301.142	855.416	410.142	357.211	329.3	576.653	317.294		5.7802	405.884	668.852	452.374	395.884	377.768	362.121		5.7802	560	435	295	680	328	351	294		5.7802	317	251	266	129	266
6.1013	334.828	465.986	613.484	309.878	841.086	419.597	365.036	318.244	588.633	286.33		6.1013	396.928	605.674	466.792	389.086	379.281	385.231		6.1013	629	449	299	627	327	347	249		6.1013	335	277	270	135	271
6.4224	368.278	469.411	657.125	293.772	822.925	417.411	366.282	312.411	591.282	284.589		6.4224	384.386	561.44	471	390.307	364.643	379.232		6.4224	662	485	307	585	295	347	233		6.4224	373	307	269	156	303
6.7435	396.906	475.162	659.838	266.945	789.067	417.432	363.851	303.838	601.744	291.73		6.7435	375.986	559.595	485.325	396.297	369.744	357.81		6.7435	653	489	312	616	280	377	243		6.7435	386	316	262	177	335
7.0646	397.568	502.297	646.995	250.424	748.7	417.285	358.712	311.005	603.141	311.866		7.0646	381.861	585.868	501.005	406.576	402.585	347.427		7.0646	687	465	313	655	278	391	252		7.0646	369	309	245	191	323
7.3858	382.879	542.66	646.565	251.278	737.713	411.296	369.834	325.695	580.609	343.956		7.3858	382.148	597.852	507.139	456.346	391.183	348.852		7.3858	763	449	309	629	276	353	267		7.3858	367	283	256	230	293
7.7069	367.329	591.282	667.92	275.765	758.631	415.403	387.805	328.577	584.805	367.517		7.7069	368.195	586.906	498.04	543.296	346.429	344.309		7.7069	828	461	296	572	271	321	273		7.7069	373	268	283	263	275
8.028	360.161	615.937	690.906	311.263	794.682	416.58	390.871	339.357	599.937	370.161		8.028	370.808	584.839	479.094	599.392	323.482	344.129		8.028	856	495	277	544	266	306	270		8.028	361	267	290	249	269
8.3491	361.833	610.085	689.21	325.541	826.538	406.793	405.58	356.748	574.964	368.292		8.3491	388.164	613.62	470.875	585.505	323.541	355.623		8.3491	842	514	266	530	272	286	283		8.3491	340	247	289	238	277
8.6702	361.587	603.174	673.281	318.521	813.802	421.371	433.904	348.575	536.856	371.533		8.6702	398.946	647.611	468.587	541.79	324.293	382.611		8.6702	797	503	275	529	292	279	303		8.6702	321	227	304	224	294
8.9914	370.87	613.985	684.92	317.82	754.946	450.15	458.51	324.67	529.525	384.28		8.9914	420.035	659.82	456.72	517.425	320.475	418.789		8.9914	748	501	297	531	307	294	308		8.9914	305	236	319	205	293
9.3125	397.508	641.508	722.245	335.178	712.899	440.712	462.89	312.78	555.618	407.288		9.3125	458.245	650.449	447.78	513.703	328.144	436.33		9.3125	733	522	309	538	321	311	312		9.3125	316	255	303	221	288
9.6336	417.527	674.158	756.755	352.527	706.807	402.824	428.315	322.93	575.123	407.982		9.6336	481.527	634.772	450.211	504.175	348.842	429.175		9.6336	751	550	317	610	321	319	330		9.6336	351	271	298	231	299
9.9547	422	689.601	796.807	359.1	723.404	373.896	393.695	333.601	553.794	389.596		9.9547	485.3	592.191	455.501	504.901	365.102	429.901		9.9547	774	571	322	705	316	314	326		9.9547	381	270	332	217	303
10.2758	426.191	671.742	806.507	364.191	762.133	369.794	406.655	331.809	519.948	382.301		10.2758	485.699	543.168	467.478	502.11	369.699	462.736		10.2758	786	549	315	720	331	315	310		10.2758	386	250	341	208	307
10.597	437.757	620.486	762.486	380.636	808.06	395.393	451.544	337.666	509.303	394.545		10.597	509.696	514.364	495.696	490.243	377.666	501.09		10.597	804	509	308	656	332	328	301		10.597	364	234	313	221	304
10.9181	443.391	554.717	743.305	404.383	860.244	437.986	493.423	355.602	509.695	409.735		10.9181	543.641	508.695	517.821	494.344	389.344	506.437		10.9181	807	485	319	589	308	323	306		10.9181	353	233	310	242	284
11.2392	446.081	528.45	771.443	423.793	899.199	472.812	518.875	364.775	531.506	416.081		11.2392	556.775	534.668	513.288	520.199	391.613	516.487		11.2392	774	478	327	596	307	306	307		11.2392	342	236	313	256	259
11.5603	444.924	558.53	792.998	434.537	911.768	486.153	507.697	359.079	566.609	412.847		11.5603	565.613	579.914	494.465	580.525	379.926	558.682		11.5603	730	501	311	621	352	324	288		11.5603	331	254	290	276	252
11.8814	437.785	582.667	818.406	441.143	916.453	485.238	458.569	355.309	554.523	407.547		11.8814	599.383	591.547	489.381	649.955	368.095	590.882		11.8814	681	544	305	575	384	351	285		11.8814	335	277	279	291	266
12.2026	440.511	593.889	874.846	443.689	888.377	491.578	427.6	360.511	510.932	399.111		12.2026	629.534	567.266	507.223	683.4	361.555	591.111		12.2026	645	560	337	526	369	358	312		12.2026	356	267	304	288	273
12.5237	445.062	615.557	928.303	449.498	846.133	509.433	435.746	365.749	503.56	391.876		12.5237	616.381	543.254	508.127	691.062	368.935	585.938		12.5237	637	540	368	539	358	339	326		12.5237	371	268	359	284	253
12.8448	427.486	623.314	952.6	461.6	830.257	524.228	444.743	368.371	550.884	400.971		12.8448	580.944	532.886	491.286	683.772	418.941	598.714		12.8448	622	508	367	548	369	333	306		12.8448	355	297	394	279	236
13.1659	409.423	620.264	952.211	493.363	837.209	546.47	441.896	360.791	596.311	416.261		13.1659	558.055	544.682	491.841	674.527	480.361	639.888		13.1659	585	522	351	510	389	337	285		13.1659	333	307	369	273	259
13.487	439.124	632.65	946.588	526.474	867.617	576.839	433.175	352.905	610.73	423.047		13.487	570.062	579.664	493.635	653.573	489.445	672.379		13.487	553	547	331	474	387	325	282		13.487	322	304	336	269	296
13.8082	486.32	656.022	962.022	523.744	905.873	593.809	422.51	351	636.511	426.043		13.8082	618.852	601.17	484.149	612.318	482.277	671.83		13.8082	525	526	301	462	367	324	293		13.8082	324	309	323	253	309
14.1293	498.283	653.132	974.076	510.528	926.83	603.793	408.811	350.321	672.453	432.434		14.1293	663.133	579.867	477.962	595.641	495.264	674.113		14.1293	500	526	291	462	363	333	315		14.1293	340	320	312	235	328
14.4504	486.835	627.67	953.637	502.256	943.875	594.125	398.579	357.454	692.81	432.967		14.4504	651.282	546.315	489.198	610.586	492.513	689.198		14.4504	489	566	310	481	378	333	319		14.4504	356	328	291	247	355
14.7715	467.803	597.043	943.676	481.747	977.718	553.522	412.225	381.281	717.957	429.972		14.7715	610.254	519.775	525.422	642.338	477.183	713.253		14.7715	502	609	322	502	404	347	310		14.7715	359	313	277	249	333
15.0926	447.511	594.419	988.513	450.744	1026.07	526.883	448.326	412.582	765.094	448.559		15.0926	599.372	504.581	565.629	678.28	494.931	748.303		15.0926	506	637	333	509	399	389	314		15.0926	363	300	279	228	319
15.4138	440.327	632.314	1050.37	438.654	1058.47	529.401	463.346	429.055	800.494	482.895		15.4138	598.982	517.148	584.055	690	526.858	773.784		15.4138	492	641	346	483	366	428	307		15.4138	371	310	298	231	336
15.7349	452.753	661.082	1070.67	458.808	1044.52	535.685	453.932	415.891	812.356	499.699		15.7349	587.932	540.438	575.589	686.644	532.973	781.342		15.7349	471	636	343	459	348	413	302		15.7349	376	320	316	246	344
16.056	473.062	654.947	1066.98	494.445	999.18	537	451.678	390.59	817.348	492.625		16.056	578.313	562.062	563.304	702.41	526.982	781.33		16.056	453	619	343	471	359	382	314		16.056	381	317	328	256	371
16.3771	484.008	642.988	1103.74	506.332	951.272	549.024	471.036	388.68	792.28	473.972		16.3771	578.004	577.684	568.016	714.34	534.352	809.056		16.3771	420	584	337	483	379	373	320		16.3771	382	321	323	259	410
16.6982	480.669	630.004	1176.31	492.672	952.66	561.664	516.652	415.324	754.343	447.008		16.6982	597.659	573.337	600.655	686.678	545.664	870.981		16.6982	405	551	323	448	376	366	314		16.6982	378	321	319	266	418
17.0194	478.665	637.631	1207.65	483.341	994.904	564.335	556.273	440.296	765.268	419.051		17.0194	660.183	563.682	649.569	651.391	568.279	907.631		17.0194	419	545	328	421	369	357	320		17.0194	395	312	334	276	422
17.3405	481.653	709.655	1170.87	502.559	1021.95	569.305	555.063	439.705	786.285	421.274		17.3405	734.749	569.621	692.864	664.875	610.496	892.115		17.3405	423	570	333	450	388	362	369		17.3405	425	314	341	275	431
17.6616	494.908	825.035	1103.37	552.033	1049.49	583.247	525.845	427.4	777.107	454.786		17.6616	741.799	601.786	723.863	717.356	652.14	886.954		17.6616	412	566	321	463	403	375	421		17.6616	408	334	360	275	444
17.9827	534.658	874.26	1073.06	603.018	1082.78	596.26	504.1	419.04	803.658	500.018		17.9827	680.203	648.998	752.139	757.139	684.139	888.68		17.9827	401	536	309	424	392	378	396		17.9827	374	348	398	274	454
18.3038	575.043	834.548	1108.18	619.658	1085.44	598.683	528.626	405.808	871.694	556.16		18.3038	618.765	679.167	774.509	770.292	720.993	873.516		18.3038	398	507	308	401	393	371	359		18.3038	375	336	402	280	463
18.625	587	752.236	1162.15	600.297	1089.54	585.522	576.838	389.492	913.105	600.643		18.625	591.805	680.089	769.835	769.373	740.911	843.014		18.625	393	504	321	408	400	356	353		18.625	400	318	393	295	462
18.9461	579.793	705.932	1198.34	581.483	1154.27	573.104	585.483	386.621	913.793	597.932		18.9461	588.31	679.621	754.828	760.138	728.277	817.897		18.9461	408	514	339	442	410	336	349		18.9461	428	321	389	300	450
19.2672	579.268	726.756	1215.19	592.685	1241.55	579.803	565.315	401.724	914.575	586.079		19.2672	591.614	684.921	750.654	763.189	721.307	814.921		19.2672	446	534	349	479	433	336	332		19.2672	417	324	380	300	447
19.5883	603.166	787.635	1227.47	614.039	1269.04	597.387	554.392	431.166	928.735	612.685		19.5883	598.215	705.254	754.26	783.95	728.519	866.547		19.5883	473	560	350	497	468	346	307		19.5883	402	317	366	316	459
19.9094	647.516	843.215	1253.46	621.65	1230.28	644.32	569.908	474.215	923.294	637.104		19.9094	631.565	737.111	782.663	821.614	745.657	953.48		19.9094	465	563	343	488	485	357	310		19.9094	415	329	357	335	453
20.2306	663.703	837.295	1322.73	618.756	1169.13	708.166	603.651	508.515	904.674	606.969		20.2306	693.41	752.244	863.818	848.028	777.002	1008.71		20.2306	448	571	354	481	461	374	330		20.2306	407	341	346	347	421
20.5517	640.998	789.409	1434.89	612.47	1145.71	734.883	641.59	516.706	911.589	556.939		20.5517	749.708	737.175	952.416	830.704	799.707	997.704		20.5517	445	610	381	483	435	377	332		20.5517	398	340	340	347	381
20.8728	639.973	775.164	1490.62	608.063	1173.4	739.582	683.402	530.846	944.174	542.582		20.8728	775.391	742.201	982.291	790.244	773.371	920.45		20.8728	461	601	394	452	449	367	339		20.8728	404	325	330	342	368
21.1939	682.058	792.166	1440.98	612.795	1194.8	743.576	720.892	558.317	986.975	558.81		21.1939	786.439	766.741	974.629	792.385	726.381	843.791		21.1939	473	568	384	432	485	346	353		21.1939	414	322	319	339	391
21.515	732.83	814.13	1397.15	614.073	1194.15	748.854	729.789	582.488	1041.54	574.065		21.515	808.626	748.382	966.789	836.683	727.342	831.277		21.515	461	573	386	449	495	331	348		21.515	430	336	330	332	423
21.8362	785.237	854.034	1427.8	588.654	1186.88	768.298	719.031	607.939	1100.16	590.173		21.8362	854.237	722.109	961.156	875.22	773.518	870.315		21.8362	461	609	400	456	457	342	351		21.8362	444	361	377	320	447
22.1573	832.48	883.503	1470.09	564.136	1184.64	782.473	712.083	628.225	1140.81	616.172		22.1573	905.953	759.457	963.473	921.149	839.374	940.764		22.1573	459	631	386	446	440	362	351		22.1573	446	385	414	315	431
22.4784	874.136	855.577	1494.75	580.949	1220.06	774.801	749.248	639.1	1147.54	654.411		22.4784	909.338	830.535	987.674	982.435	920.459	996.773		22.4784	447	633	359	444	447	376	343		22.4784	454	386	421	315	404
22.7995	890.272	817.56	1528.71	632.787	1248.9	756.919	816.781	654.081	1145	700.521		22.7995	882.56	853.821	1047.05	1030.16	981.885	994.832		22.7995	452	661	355	462	458	391	338		22.7995	472	360	423	326	398
23.1206	871.338	810.171	1575.71	682.907	1221.65	774.101	834.121	668.611	1177.35	722.44		23.1206	877.708	835.51	1148.21	1050.98	978.704	950.751		23.1206	481	718	357	497	488	394	341		23.1206	449	347	431	336	390
23.4418	846.715	842.367	1659.79	697.102	1206.16	813.938	834.694	658.449	1236.49	724.367		23.4418	883.531	822.837	1246.67	1050.57	940.429	913.286		23.4418	485	729	363	516	503	411	338		23.4418	405	369	442	337	382
23.7629	830.797	923.734	1763.63	680.224	1254.07	811.962	853.145	626.021	1271.99	736.621		23.7629	907.086	809.01	1275.85	1029.07	905.438	926.979		23.7629	474	698	386	523	487	424	337		23.7629	377	414	442	328	387
24.084	826.629	1005.06	1838.51	652.117	1345.83	805.147	850.041	609.482	1248.79	738.965		24.084	955.248	799.482	1248.19	1021.15	873.859	994.501		24.084	474	671	401	510	451	402	354		24.084	377	457	452	331	385
24.4051	864.669	1043.56	1868.79	630.955	1443.64	841.53	844.256	625.579	1201.49	717.166		24.4051	984.789	803.023	1229.86	1051.25	885.857	1058.65		24.4051	468	637	401	494	420	357	359		24.4051	399	469	458	356	370
24.7262	959.64	1071.66	1860.85	645.039	1482.76	855.112	842.495	638.505	1222.83	704.748		24.7262	995.636	816.019	1301.89	1051.09	969.509	1044.18		24.7262	467	623	393	499	410	329	349		24.7262	413	478	452	362	378
25.0474	1068.58	1152.71	1833.01	692.602	1487.5	824.767	828.508	628.757	1262.86	739.602		25.0474	1042.72	837.615	1444.06	997.278	1037.86	973.408		25.0474	477	687	372	502	426	324	355		25.0474	405	486	458	335	401
25.3685	1143.51	1243.84	1813.52	720.853	1507.07	813.361	832.837	620.754	1231.88	811.462		25.3685	1077.72	851.984	1542.25	978.476	1047.15	920.572		25.3685	517	758	376	494	472	322	349		25.3685	387	480	454	319	389
25.6896	1199.8	1252.87	1825.78	717.543	1519.86	840.234	872.312	645.477	1188.36	874.933		25.6896	1071.82	853.757	1618.2	1020.28	1095.82	898.301		25.6896	564	745	422	503	521	328	339		25.6896	381	474	435	336	373
26.0107	1255.09	1221.41	1844.68	726.015	1516.04	887.228	910.593	713.061	1209.23	921.031		26.0107	1071.82	871.593	1757.22	1055.4	1184.4	907.875		26.0107	582	722	430	527	551	347	338		26.0107	404	485	431	373	385
26.3318	1311.85	1222.36	1821.56	761.818	1533.4	926.781	912.109	772.818	1295.76	945.654		26.3318	1079.71	939.253	1889.14	1043.22	1210.96	976.962		26.3318	591	738	390	581	586	372	344		26.3318	429	483	446	410	419
26.653	1354.96	1236.17	1789.82	810.445	1570.05	909.405	933.745	788.767	1401.74	936.203		26.653	1105.43	1032.57	1894.86	1034.7	1198.6	1063.94		26.653	614	763	366	649	606	383	348		26.653	427	448	456	449	454
26.9741	1344.02	1234.46	1815.44	858.288	1593.61	873.781	1020.49	774.471	1520.1	911.626		26.9741	1138.45	1098.52	1821.96	1071.44	1198.92	1128.21		26.9741	616	792	364	691	583	381	342		26.9741	420	422	461	489	458
27.2952	1320.41	1213.83	1874.41	880.907	1635.19	886.92	1078.11	749.44	1653.64	933.281		27.2952	1117.49	1124.97	1759.95	1096.68	1192.19	1179.05		27.2952	583	848	370	689	565	378	336		27.2952	421	443	455	494	435
27.6163	1349.87	1184.65	1889.44	868.707	1705.71	924.023	1082.11	751.846	1729.63	1039.26		27.6163	1071.92	1076.17	1758.74	1108.79	1200.68	1223.69		27.6163	557	914	403	624	575	378	339		27.6163	433	470	458	500	415
27.9374	1390.3	1174.22	1873.63	873.033	1752.47	962.405	1099.13	774.033	1684.82	1156.23		27.9374	1051.73	974.276	1784.03	1143.07	1255.15	1242.44		27.9374	564	941	442	597	586	392	349		27.9374	461	456	462	522	414
28.2586	1390.44	1189.6	1905.34	928.248	1763	1001.12	1150.34	773.872	1547.81	1180.18		28.2586	1056.91	920.047	1743.71	1167.09	1288.87	1240.96		28.2586	576	978	465	647	586	412	341		28.2586	493	453	466	484	418
28.5797	1354.47	1226.31	2056.84	1011.41	1752.68	1022.68	1227.8	754.041	1420.27	1159.08		28.5797	1086.28	940.311	1639.17	1169.18	1244.66	1285.73		28.5797	606	1050	493	700	590	443	330		28.5797	516	505	500	435	424
28.9008	1345.08	1297.87	2322.41	1077.48	1750.24	1034.26	1296.5	732.289	1390.5	1178.03		28.9008	1120.77	971.317	1570.81	1188.58	1163.76	1364.42		28.9008	629	1118	526	703	606	496	341		28.9008	540	576	549	409	438
29.2219	1394.47	1375.86	2531.95	1100.41	1780.77	1056.51	1369.11	732.452	1465.61	1198.02		29.2219	1136.62	986.641	1563.04	1208.04	1116.51	1410.49		29.2219	571	1149	528	697	635	521	380		29.2219	542	572	559	399	451
29.543	1424.81	1415.44	2572.34	1117.65	1808.63	1087.27	1461.01	766.9	1558.77	1171.7		29.543	1110.7	1030.14	1582.65	1215.61	1104.59	1457.93		29.543	511	1155	504	710	634	478	405		29.543	552	523	545	405	441
29.8642	1377.36	1419.4	2529.38	1164.03	1833.62	1121.62	1509.61	822.629	1619.22	1125.98		29.8642	1049.37	1093.23	1659.65	1256.43	1094.59	1520.23		29.8642	509	1177	474	743	598	435	401		29.8642	573	497	555	430	415
30.1853	1273.73	1388.85	2537.15	1219.74	1881.33	1170.14	1498.03	899.701	1697.89	1118.18		30.1853	1024.59	1131.77	1829.76	1317.33	1077.62	1495.29		30.1853	553	1205	473	786	560	460	383		30.1853	563	479	564	458	412
30.5064	1167.47	1324.01	2615.73	1318.05	1918.14	1237.2	1483.01	984.573	1857.45	1129.78		30.5064	1071.2	1167.28	1998.21	1346.97	1080.15	1396.9		30.5064	626	1161	498	778	547	503	384		30.5064	528	465	567	442	444
30.8275	1095.83	1275.13	2669.1	1455.78	1946.06	1324.78	1488.74	1029.91	2091.08	1112.75		30.8275	1153.42	1209.42	2019.26	1335.51	1128.1	1321.43		30.8275	679	1074	535	764	550	503	407		30.8275	505	466	597	459	473
31.1486	1080.54	1276.66	2639.39	1523.51	2017.22	1426.38	1537.37	1091.46	2301.34	1110.29		31.1486	1243.06	1235.51	1964.11	1324.41	1220.16	1326.14		31.1486	668	1053	551	783	569	487	427		31.1486	490	468	611	511	460
31.4698	1164.39	1280.08	2591.08	1506.3	2093.73	1478.48	1633.35	1200.28	2384.66	1151.18		31.4698	1319.69	1230.74	2030.09	1346.51	1344.57	1397.32		31.4698	624	1110	555	754	609	491	421		31.4698	487	466	601	500	426
31.7909	1326.53	1255.91	2618.54	1481.73	2102.46	1470.82	1670.14	1261.82	2353.01	1194.09		31.7909	1370.63	1201.73	2205.21	1410.45	1415.95	1434.59		31.7909	591	1164	574	709	633	502	408		31.7909	511	468	608	484	423
32.112	1436.94	1258.5	2735.8	1505.46	2089.82	1462.77	1619.81	1282.37	2297.72	1206.82		32.112	1400.55	1169.32	2316.82	1497.62	1366.9	1414.97		32.112	628	1158	586	692	605	511	416		32.112	541	462	610	514	451
32.4331	1459.65	1321.71	2892.78	1568.31	2112.51	1452.25	1596.05	1283.36	2281.53	1205.41		32.4331	1407.65	1142.9	2273.77	1576.13	1285.04	1435.67		32.4331	718	1180	590	709	584	523	421		32.4331	582	487	591	547	461
32.7542	1453.31	1464.65	3040.28	1640.78	2173.54	1417.04	1702.97	1256.32	2325.61	1217.31		32.7542	1407.17	1118.35	2112.55	1689.97	1267.55	1488.13		32.7542	773	1209	575	749	596	517	426		32.7542	625	535	581	552	466
33.0754	1454.09	1665.06	3149.6	1673.34	2227.79	1386.9	1881.36	1255.61	2414.03	1244.7		33.0754	1413.26	1126.12	1952.69	1805.52	1287.27	1486.38		33.0754	796	1190	572	797	601	492	444		33.0754	605	539	581	535	502
33.3965	1471.57	1830.93	3175.93	1678.5	2195.63	1380.17	2003.62	1295.14	2463.58	1268.49		33.3965	1382.62	1160.56	1897.58	1783.22	1291.34	1484.99		33.3965	843	1155	575	850	607	471	458		33.3965	561	517	609	521	528
33.7176	1491.88	1897.62	3119.76	1689.72	2099.97	1392.62	2037.58	1350.29	2455.05	1273.09		33.7176	1304.53	1136.48	1907.88	1685.53	1271.15	1567.07		33.7176	870	1110	585	924	651	468	468		33.7176	537	506	657	538	526
34.0387	1508.27	1932.08	3131.37	1654.85	2033.98	1412.01	2018.29	1427.16	2467.6	1265.2		34.0387	1272.38	1045.98	1903.99	1666.71	1231.76	1714.05		34.0387	885	1061	639	971	688	474	475		34.0387	527	498	676	551	516
34.3598	1549.1	2005.91	3326.83	1599.57	2047.48	1451.21	1968.17	1508.93	2538.33	1247.13		34.3598	1312.83	995.798	1922.59	1691.4	1199.29	1846.58		34.3598	934	1041	732	979	657	507	509		34.3598	575	487	654	526	520
34.681	1589.56	2038.51	3540.68	1601.75	2126.64	1567.37	1934.51	1547.92	2680.59	1249.68		34.681	1342.46	1060.01	2035.37	1675.37	1188.27	1907.98		34.681	958	992	800	988	624	542	558		34.681	622	484	643	507	540
35.0021	1601	1965.18	3598.93	1650.91	2204.06	1774.52	1924.98	1563.92	2893.37	1298.66		35.0021	1328.33	1171.5	2169.52	1635.58	1189.3	1906.36		35.0021	959	913	773	999	616	540	575		35.0021	587	482	654	504	543
35.3232	1641.69	1855.39	3548.16	1720.71	2270.69	1977.3	1896.78	1598.94	3087.85	1375		35.3232	1293.07	1223.88	2185.33	1584.61	1246.02	1867.77		35.3232	975	893	734	1015	623	522	586		35.3232	525	496	656	517	546
35.6443	1728.58	1821.86	3422.12	1768.29	2367.3	2013.13	1867.14	1635.58	3209.01	1458.58		35.6443	1251.99	1218.14	2166.72	1540.71	1345.87	1835.14		35.6443	990	925	745	1064	645	511	624		35.6443	493	523	628	528	561
35.9654	1784.11	1879.58	3241	1734.55	2500.21	1882.55	1893.77	1661.68	3269.66	1523.5		35.9654	1210.06	1213.42	2234.26	1559.49	1376.89	1809.33		35.9654	971	997	782	1161	660	508	658		35.9654	507	555	578	513	576
36.2866	1761.61	1932.35	3093.78	1678.84	2714.74	1772.47	1963.76	1683.93	3217.8	1525.68		36.2866	1196.55	1222.82	2285.41	1630.04	1312.44	1742.01		36.2866	891	1097	806	1218	626	523	619		36.2866	552	588	560	491	557
36.6077	1717.73	1978.57	3056.33	1717.54	2984.72	1791.77	1999.83	1735.5	3078.72	1518.93		36.6077	1244.2	1222.9	2249.46	1693.9	1226.23	1660.2		36.6077	837	1219	819	1214	564	565	564		36.6077	567	571	575	477	518
36.9288	1691.7	2067.73	3159.37	1808.6	3096.22	1942.41	1982.22	1831.29	2970.75	1575.86		36.9288	1300.6	1208.26	2245.43	1733.52	1185.22	1651.04		36.9288	824	1295	836	1197	532	600	564		36.9288	538	523	577	472	492
37.2499	1695.96	2152.63	3312.58	1876.99	2986.75	2173.44	1982.78	1909.87	2902.94	1667.97		37.2499	1316.87	1174.64	2335.44	1744.75	1199.16	1714.77		37.2499	805	1320	860	1204	572	620	580		37.2499	507	501	573	484	509
37.571	1784.67	2206.28	3401.97	1913.36	2839.7	2313.9	2029.28	1927.94	2902.53	1742.71		37.571	1335.67	1157.81	2415.85	1740.19	1223.55	1782.47		37.571	827	1367	889	1289	651	667	565		37.571	525	506	573	505	540
37.8922	1948.53	2283.71	3408.43	1915.72	2690.51	2257.88	2058.8	1948.09	3041.66	1775.16		37.8922	1376.21	1215.47	2417.51	1776.1	1239.4	1859.67		37.8922	876	1465	892	1367	727	693	546		37.8922	570	510	551	506	533
38.2133	2072.02	2379.28	3363.48	1937.38	2556.46	2138.01	2066.59	2021.19	3205.51	1830.28		38.2133	1392.09	1280.23	2362.22	1864.1	1256.06	1967.48		38.2133	893	1592	851	1336	788	669	550		38.2133	560	506	557	507	519
38.5344	2089.29	2420.67	3287.98	2014.15	2515.46	2069.05	2086.04	2117.48	3212.98	1996.46		38.5344	1372.85	1246.86	2236.41	1927.27	1272.91	2039.5		38.5344	917	1619	764	1237	788	624	599		38.5344	537	542	605	535	507
38.8555	2113.22	2396.45	3230.11	2049.67	2543.44	2041.11	2078.56	2229.43	3115.12	2201.43		38.8555	1373.89	1162.56	2068.68	1917.12	1297.22	2082.77		38.8555	908	1557	698	1153	757	577	658		38.8555	529	570	637	536	480
39.1766	2278.14	2342.77	3180.11	2007	2679.86	2112.65	2069.09	2336.51	3103.45	2305.49		39.1766	1431.52	1149.71	1936.4	1911.85	1302.14	2136.57		39.1766	838	1578	743	1114	701	560	685		39.1766	517	542	651	501	453
39.4978	2511.81	2300.54	3057.01	1971.37	2981.09	2288.11	2098.3	2364.19	3218.15	2321.45		39.4978	1505.45	1214.94	1877.3	1946.19	1265.73	2163.1		39.4978	797	1694	842	1104	659	606	685		39.4978	508	548	659	502	441
39.8189	2540.87	2350.77	2904.01	1954.99	3293.82	2440.67	2088.82	2321.06	3306.72	2321		39.8189	1578.5	1258.51	1857.09	1940.22	1210.61	2145.83		39.8189	793	1640	840	1103	668	672	658		39.8189	503	595	643	520	442
40.14	2355.17	2481.06	2838.16	1963.02	3461.41	2471.24	2065.55	2254.37	3272.04	2305.08		40.14	1685.92	1252.57	1844.06	1878.82	1189.39	2098.61		40.14	749	1458	799	1057	692	721	671		40.14	499	579	624	502	444
40.4611	2227.46	2606.22	2903.43	2045.98	3512.95	2438.58	2099.39	2175.56	3210.74	2233.97		40.4611	1811.79	1244.55	1879.41	1797.92	1266.9	2044.63		40.4611	725	1451	832	998	681	748	700		40.4611	525	509	620	476	430
40.7822	2182.89	2689.84	3061.52	2148.85	3493.07	2451.74	2125.91	2142.91	3192.36	2111.77		40.7822	1843.53	1297.4	1961.67	1734.98	1377.67	2030.73		40.7822	754	1558	936	976	639	734	669		40.7822	571	443	643	456	441
41.1034	2152.75	2664.12	3181.92	2202.78	3387.91	2478.9	2117.38	2190.54	3143.65	2009.18		41.1034	1732.03	1417.73	2026.94	1738.94	1383.08	2011.88		41.1034	773	1514	983	963	606	711	634		41.1034	641	436	652	458	481
41.4245	2165.62	2523.5	3171.85	2226.31	3235.9	2464.55	2132.7	2275.29	3120.82	1986.94		41.4245	1610.51	1509.67	2017.16	1852.33	1310.13	1904.27		41.4245	798	1430	988	898	594	702	647		41.4245	701	470	622	487	533
41.7456	2176.51	2411.08	3121.77	2193.34	3093.05	2443.59	2165.61	2344.13	3260.51	1971.57		41.7456	1587.07	1520.56	1943.85	2088.97	1270.21	1760.05		41.7456	860	1416	1067	838	599	695	659		41.7456	732	492	603	511	579
42.0667	2159.13	2395.33	3116.63	2096.51	2985.61	2441.16	2164.51	2353.44	3482.43	1922.49		42.0667	1630.29	1489.5	1878.73	2336.27	1274.55	1683.9		42.0667	937	1408	1141	837	618	680	673		42.0667	749	511	586	535	587
42.3878	2192.56	2403.92	3103.03	2064.97	2912.12	2454.83	2134.72	2346.92	3604.66	1963		42.3878	1660.23	1450.49	1837.56	2420.09	1282.61	1709.72		42.3878	1034	1337	1135	839	655	664	725		42.3878	767	527	541	561	572
42.709	2362.97	2451.79	3069.45	2188.63	2825.09	2467.14	2116.32	2378.27	3623.39	2126.31		42.709	1642.62	1383.21	1786.22	2329.11	1308.66	1791.26		42.709	1124	1216	1093	846	680	673	761		42.709	768	531	518	553	544
43.0301	2599.35	2595.57	3119.61	2384.24	2810.82	2493.05	2133.24	2397.79	3657.82	2294.3		43.0301	1639.43	1305.72	1740.43	2230.06	1359.4	1887.53		43.0301	1160	1237	1110	872	650	679	752		43.0301	742	527	538	529	514
43.3512	2752.43	2731.97	3276.26	2509.64	2966.18	2504.94	2140.94	2438.17	3741.76	2354.74		43.3512	1666.39	1242.49	1730.8	2187.48	1381.27	1994.16		43.3512	1169	1458	1191	893	598	639	736		43.3512	731	536	554	520	499
43.6723	2842.88	2730.96	3439.39	2524.06	3206.78	2432.71	2057.55	2556.76	3834.76	2334.53		43.6723	1658.28	1176.27	1730.22	2134.74	1351.96	2032.18		43.6723	1171	1720	1227	937	551	600	732		43.6723	741	575	575	485	483
43.9934	2911.96	2659.63	3501.29	2525.36	3390.81	2338.92	1918.42	2603.63	3921.03	2310.47		43.9934	1593.38	1130.82	1688.39	2080.34	1353.37	1952.72		43.9934	1156	1768	1208	976	560	628	770		43.9934	737	631	617	442	470
44.3146	2933.42	2649.54	3477.4	2582.84	3425.65	2312.34	1871.43	2527.07	3931.95	2278.76		44.3146	1491.27	1146.93	1631.76	2053.02	1453.16	1847.58		44.3146	1119	1570	1170	934	652	676	874		44.3146	719	653	650	446	482
44.6357	2932.53	2699.64	3513.23	2695.19	3391.94	2294.31	2020.21	2475.89	3789.11	2231.15		44.6357	1361.71	1205.22	1648.38	2059.74	1608.82	1808.05		44.6357	1112	1425	1110	870	767	690	983		44.6357	712	630	681	487	487
44.9568	2881.03	2697.51	3682.21	2833.44	3439.22	2244.65	2349.44	2481.87	3582.69	2149.78		44.9568	1256.73	1296.37	1746.57	2030.48	1712.25	1789.05		44.9568	1130	1397	1054	842	832	710	993		44.9568	713	586	705	484	481
45.2779	2763.35	2571.66	3849.09	2927.26	3563.22	2225.28	2655.18	2462.83	3449.14	2003.8		45.2779	1255.44	1448.86	1787.21	1898.33	1677.39	1698.26		45.2779	1159	1329	1017	852	851	757	945		45.2779	709	562	679	446	493
45.599	2646.83	2426.66	3864.96	2910.22	3695.78	2257.09	2669.18	2388.39	3378.13	1858		45.599	1320.48	1614.17	1698.48	1755.09	1548.88	1578.79		45.599	1147	1247	1036	903	865	779	934		45.599	691	590	672	421	499
45.9202	2566.23	2399.97	3765.47	2735.26	3758.04	2268	2467.98	2311.83	3317.31	1817.04		45.9202	1346.76	1715.21	1608.08	1711.88	1472.2	1524.28		45.9202	1076	1241	1105	983	884	757	961		45.9202	681	627	660	443	499
46.2413	2510.08	2457.22	3695.15	2466.9	3671.89	2225.41	2370.89	2280.89	3333.07	1876.15		46.2413	1324.93	1748.15	1595.33	1744.85	1540.18	1523.67		46.2413	1031	1320	1116	986	939	727	945		46.2413	645	611	623	464	486
46.5624	2468.43	2466.26	3735.62	2247.68	3483.49	2200.62	2445.61	2348.81	3471.69	1942.78		46.5624	1288.81	1729.77	1587.46	1770.62	1673.06	1510.94		46.5624	1034	1445	1076	915	980	728	880		46.5624	614	575	591	445	463
46.8835	2467.97	2428.51	3861.87	2143.81	3262.43	2218.43	2472.51	2573.7	3593.4	1993.34		46.8835	1272.09	1669.84	1549.84	1771.42	1701.6	1455.84		46.8835	1002	1585	1092	917	938	750	868		46.8835	627	549	584	426	451
47.2046	2557.48	2446.9	3984.26	2112.75	3041.64	2278.74	2350.08	2912.54	3651.79	2055.44		47.2046	1279.62	1601.67	1526.43	1769.51	1629.85	1383.56		47.2046	970	1642	1194	971	902	730	928		47.2046	624	548	589	419	444
47.5258	2651.04	2550.18	4029	2077.89	2929.25	2431.56	2213.31	3244.08	3763.47	2108.97		47.5258	1251.74	1538.2	1556.77	1766.93	1638.16	1344.88		47.5258	993	1530	1285	1036	875	675	954		47.5258	594	556	604	411	451
47.8469	2620.93	2715.5	4027.98	2054.53	2978.21	2610.04	2159.9	3432.39	3861.89	2147.4		47.8469	1188.33	1462.61	1649.77	1779.82	1785.56	1335.41		47.8469	1037	1458	1297	1124	882	653	912		47.8469	551	551	577	415	451
48.168	2533.85	2898.56	4044.3	2111.97	3037.54	2680.47	2143.3	3414.97	3801.13	2191.95		48.168	1153.95	1444.92	1770.57	1805.18	1918.13	1298.94		48.168	1056	1505	1322	1179	928	676	920		48.168	518	534	540	413	442
48.4891	2459.45	3020.51	4074.19	2234.98	3020.72	2640.96	2120.33	3302.71	3657.54	2215.48		48.4891	1164.19	1546.11	1877.68	1775.94	1915.46	1242.13		48.4891	1046	1526	1366	1161	926	746	1060		48.4891	539	522	528	398	434
48.8102	2384.08	3094.44	4090.03	2348.52	3054.08	2559.51	2184.34	3231.81	3644.08	2147.26		48.8102	1204.81	1650.32	1954.34	1699.57	1866.36	1213.46		48.8102	1014	1454	1319	1074	926	820	1249		48.8102	574	522	509	386	430
49.1314	2338.43	3124.94	4091.49	2450.95	3191.19	2440.4	2417.27	3156.03	3752.46	2001.36		49.1314	1285.93	1663.89	1940.15	1602.53	1876.68	1233.18		49.1314	972	1434	1206	1023	968	844	1397		49.1314	580	545	484	378	433
49.4525	2362.66	3045.16	4084.47	2582.36	3351.36	2295.66	2735.78	3028.67	3789.41	1845.13		49.4525	1378.69	1618.35	1783.96	1490.24	1901.01	1317.8		49.4525	985	1460	1144	1061	1000	841	1453		49.4525	550	595	513	378	445
49.7736	2414.53	2946.96	4068.48	2690.05	3554.21	2205.97	3013.69	2929.45	3733.94	1756.48		49.7736	1428.02	1551.94	1570.84	1451.52	1866.94	1423.07		49.7736	1029	1452	1160	1155	1050	862	1487		49.7736	525	609	555	399	467
50.0947	2402.55	2924.49	4043.52	2649.12	3793.82	2160.54	3140.98	2921.96	3676.03	1797.91		50.0947	1467.45	1491.54	1428.57	1551.86	1756.12	1464.01		50.0947	1006	1436	1174	1208	1100	937	1543		50.0947	554	590	543	443	459
50.4158	2323.73	2924.52	4006.61	2441.15	3920.93	2101.16	3050.49	3039.04	3668.93	1879.87		50.4158	1544.77	1420.72	1396.45	1728.56	1585.46	1462.49		50.4158	955	1423	1184	1158	1071	1033	1527		50.4158	599	585	548	461	427
50.737	2252.19	2937.36	3962.18	2166.63	3896.32	2043.19	2835.42	3250.06	3708.8	1867.33		50.737	1630.2	1331.35	1424.35	1836.86	1417.58	1474.91		50.737	944	1367	1206	1076	1066	1018	1474		50.737	630	588	586	449	415
51.0581	2243.33	2954.01	3951.37	1941.45	3803.6	1978.96	2667.1	3469.35	3718.18	1820.56		51.0581	1659.6	1270.19	1454.37	1844.11	1313.36	1450.9		51.0581	951	1283	1264	1049	1130	918	1476		51.0581	651	583	574	447	414
51.3792	2298.42	2890.91	3976.8	1856.98	3724.87	1925.19	2584.91	3666.62	3672.93	1867.73		51.3792	1611.09	1257.93	1487.68	1823.16	1279.52	1377.55		51.3792	942	1247	1300	1049	1131	897	1553		51.3792	662	585	524	455	420
51.7003	2379.77	2785.25	3988.54	1871.75	3719.63	1955.71	2468.08	3807.7	3617.46	1972.59		51.7003	1528.74	1255.63	1553.71	1797.27	1288.31	1386.64		51.7003	960	1314	1341	1057	1042	930	1680		51.7003	690	592	509	459	456
52.0214	2446.97	2830.61	4004.11	1865.44	3726.8	2067.58	2263.91	3790.85	3572.4	2043.11		52.0214	1436.56	1234.78	1625.92	1805.5	1306.34	1502.09		52.0214	1074	1459	1442	1154	954	936	1769		52.0214	738	598	541	483	493
52.3426	2501.3	3078.65	4047.4	1834.24	3632.47	2175.06	2057.2	3591.3	3559.83	2010.28		52.3426	1338.65	1229.3	1644.73	1857.33	1313.51	1572.95		52.3426	1244	1482	1563	1252	893	847	1702		52.3426	776	613	553	534	456
52.6637	2528.08	3246.38	4082.24	1853.67	3476.54	2201.87	1920.23	3333.31	3594.72	1889.37		52.6637	1282.22	1231.19	1648.13	1888.43	1319.81	1581.32		52.6637	1292	1395	1605	1197	845	745	1498		52.6637	775	634	543	568	409
52.9848	2469.26	3061.47	4092.49	1944.14	3359.77	2170.55	1904.54	3085.39	3634.18	1810.28		52.9848	1297.27	1201.22	1711.44	1895.36	1355.6	1623.87		52.9848	1155	1343	1467	1093	828	704	1226		52.9848	790	635	573	586	436
53.3059	2367.97	2697.67	4088.65	2125.36	3322.8	2201.76	2029.76	2814.86	3661.43	1826.61		53.3059	1350.02	1175.07	1774.15	1914.01	1402.43	1708.86		53.3059	975	1296	1279	1051	846	676	1060		53.3059	867	623	619	610	482
53.627	2322.52	2494.63	4062.81	2398.86	3371.85	2300.74	2188.23	2614	3745.93	1880.96		53.627	1378.07	1173.48	1769.59	1902.04	1413.74	1796.08		53.627	819	1220	1143	1012	907	623	1079		53.627	932	597	631	617	500
53.9482	2350.31	2475.96	3991.05	2617.47	3443.91	2336.08	2228.01	2605.03	3871.75	1923.92		53.9482	1372.64	1161.52	1763.56	1811.57	1389.72	1860.47		53.9482	752	1248	1044	947	983	577	1198		53.9482	904	567	629	642	508
54.2693	2432.18	2434.04	3901.17	2616.52	3503.09	2312.87	2160.39	2739.7	3939.57	1944.26		54.2693	1377.61	1135.56	1779.78	1730.65	1350.43	1930.05		54.2693	772	1400	986	924	991	570	1275		54.2693	863	573	623	675	519
54.5904	2514.22	2296.73	3883.4	2387.65	3530.33	2305.91	2075.91	2857.7	3933.32	1967.16		54.5904	1412.27	1101.98	1761.17	1703.56	1323.23	2028.96		54.5904	802	1494	963	981	914	615	1216		54.5904	872	620	611	655	536
54.9115	2555.35	2197.32	3929.85	2064.45	3428.46	2288.52	2002.6	2807.66	3884.12	1965.57		54.9115	1456.15	1060.52	1717.42	1637.32	1314.2	2105.48		54.9115	809	1459	952	1027	811	681	1106		54.9115	908	647	605	629	558
55.2326	2595.99	2180	3928.91	1825.98	3260.55	2231.49	1953.85	2661.76	3819.7	1876.71		55.2326	1463.58	1048	1711.73	1543.91	1313.79	2108.06		55.2326	834	1445	967	975	723	756	1001		55.2326	917	621	607	632	540
55.5538	2667.05	2166.32	3834.47	1766.35	3192.83	2151.89	1922.37	2685.24	3741.64	1766.19		55.5538	1423.69	1094.33	1745.88	1506.47	1326.49	1999.23		55.5538	855	1482	1006	889	666	812	919		55.5538	876	547	625	668	494
55.8749	2742.16	2153.35	3684.29	1842.08	3173.43	2069.38	1927.16	2914.73	3683.07	1728.76		55.8749	1350.15	1151.46	1743.96	1510.76	1356.22	1795.19		55.8749	874	1546	1015	881	655	847	865		55.8749	774	487	650	668	512
56.196	2760	2133.04	3591.97	1892.22	3045.37	2039.65	1999.27	3056.84	3707.68	1772.84		56.196	1285.19	1155	1684.26	1519.69	1381.81	1609.45		56.196	922	1620	968	937	707	874	806		56.196	716	491	672	614	553
56.5171	2707.51	2057.49	3610.15	1864.59	2775.34	2114.72	2048.86	2936.57	3762.41	1866.57		56.5171	1263.13	1137.07	1629.19	1529.2	1349.51	1527.46		56.5171	925	1659	861	942	802	865	756		56.5171	741	528	675	638	557
56.8382	2602.77	1982.38	3641.86	1882.84	2491.55	2239.39	2029.04	2638.91	3773.48	1962.49		56.8382	1257.28	1165.32	1619.31	1541.45	1287.59	1545.13		56.8382	879	1642	775	923	880	827	791		56.8382	742	556	688	712	538
57.1594	2480.3	1988.37	3663.02	1980.59	2338.71	2335	2008.83	2331.97	3767.86	2041		57.1594	1289.18	1235.18	1664.79	1593.6	1260.68	1593.94		57.1594	849	1623	769	890	861	794	881		57.1594	736	571	701	721	533
57.4805	2405.51	2021.85	3753.41	2072.35	2339.28	2414.06	1973.49	2155.55	3791.26	2123.76		57.4805	1391.09	1288.09	1736.43	1732.28	1275.1	1644.27		57.4805	840	1606	760	843	785	803	960		57.4805	746	547	668	729	530
57.8016	2329.65	1956.29	3861.56	2058.78	2391.36	2512.75	1928.33	2030.84	3849.62	2223.98		57.8016	1485.87	1318.04	1799.71	1910.54	1312.96	1725.75		57.8016	833	1508	720	805	724	810	983		57.8016	688	492	618	761	497
58.1227	2199.9	1808.15	3814.22	1895	2334.94	2598.08	1944.08	1848.99	3891.3	2255.13		58.1227	1506.28	1376.1	1860.38	2014.61	1325.28	1830.36		58.1227	830	1394	707	735	683	775	994		58.1227	631	455	601	723	473
58.4438	2079.46	1722.43	3559.37	1661.46	2170.41	2610.33	1958.62	1711.84	3880.28	2136.89		58.4438	1486.85	1414.14	1902.32	2009.21	1282.53	1845.66		58.4438	827	1381	740	681	662	727	1030		58.4438	628	455	622	650	472
58.765	1979.78	1742.98	3240.56	1515.02	2039.99	2511.8	1846.39	1725.76	3850.78	1953.88		58.765	1483.75	1352.22	1924.22	1936.33	1212.1	1727.44		58.765	830	1412	784	681	674	695	1021		58.765	641	486	622	592	477
59.0861	1871.04	1778.09	3080.55	1521.24	1972.93	2363.86	1670.23	1814.79	3797.76	1864.36		59.0861	1517.98	1261.2	1993.59	1819.87	1178.54	1590.22		59.0861	875	1405	759	692	726	696	965		59.0861	657	513	630	563	463
59.4072	1799.23	1782.55	3132.38	1602.21	1948.07	2302.6	1592.71	1853.12	3707.74	1881.84		59.4072	1580.13	1231.71	2124.98	1697.84	1203.01	1474.14		59.4072	905	1435	694	694	743	701	913		59.4072	656	516	651	561	447
59.7283	1788.16	1792.82	3202.55	1644.65	1996.29	2318.41	1615.39	1823.45	3577.24	1855.45		59.7283	1639.29	1224.18	2278.61	1630.73	1238.18	1384.65		59.7283	935	1463	665	724	672	656	860		59.7283	623	503	645	595	458
60.0494	1772.23	1827.12	3153.02	1644.35	2103.37	2311.07	1653.83	1797.8	3362.78	1775.73		60.0494	1712.53	1210.1	2435.3	1637.67	1262.89	1369.83		60.0494	970	1390	689	764	609	601	824		60.0494	557	489	611	637	487
60.3706	1705.91	1859.72	3050.02	1672.42	2186.12	2245.64	1701.1	1798.21	3110.02	1767.94		60.3706	1857.52	1202.73	2556.16	1720.76	1293.81	1410.84		60.3706	917	1318	742	775	581	583	824		60.3706	514	510	618	682	507
60.6917	1604.03	1886.29	2919.37	1727.75	2146.22	2161.46	1737.89	1793.77	2954	1809.28		60.6917	2009.4	1162.43	2632.78	1847.32	1353.14	1445.25		60.6917	856	1344	790	734	577	599	835		60.6917	501	544	674	724	500
61.0128	1536.22	1947.23	2749.65	1725.33	1982.65	2156.34	1705.21	1799.89	2954.9	1838.56		61.0128	2056.78	1093.99	2687.89	1929.34	1455.79	1472.56		61.0128	861	1413	803	622	597	601	821		61.0128	500	535	673	716	480
61.3339	1572.41	1984.37	2672.62	1652.89	1805	2185.34	1635.54	1798.6	3019.6	1808.27		61.3339	1995.72	1042.17	2639.46	1916.77	1552.8	1493.9		61.3339	886	1441	795	569	585	571	805		61.3339	507	505	617	706	491
61.655	1679.96	1929.52	2700.27	1626.77	1684.05	2176.7	1616.89	1766.23	3007.25	1689.33		61.655	1881.6	1021	2446.53	1823.95	1543.4	1482.5		61.655	964	1440	790	579	540	538	799		61.655	508	483	572	724	510
61.9762	1768.11	1836.55	2663.19	1678.78	1606.98	2173.08	1687.13	1721.26	2996.74	1564.71		61.9762	1783.66	1042.98	2262.43	1696.72	1434.84	1484.43		61.9762	1020	1448	795	575	507	508	766		61.9762	547	483	554	753	505
62.2973	1831.8	1715.78	2557.19	1728.95	1559.92	2151.15	1783.86	1639.74	3176.37	1459.68		62.2973	1755.95	1098.16	2180.04	1575.93	1333.09	1469.65		62.2973	929	1455	773	570	502	495	712		62.2973	592	485	553	766	534
62.6184	1940.55	1584.22	2453.42	1719.87	1548.75	2113.2	1836.04	1536.9	3417.22	1344		62.6184	1794.88	1141.73	2133.43	1479.83	1279.41	1381.37		62.6184	809	1469	736	579	534	482	665		62.6184	583	475	556	783	560
62.9395	2029.13	1525.09	2360.25	1645.21	1528.82	2118.31	1839.87	1496.39	3460.08	1255.6		62.9395	1842.22	1146.04	2082.12	1429.17	1258.87	1286.86		62.9395	761	1410	749	563	594	482	637		62.9395	558	477	557	769	538
63.2606	2021.5	1538.2	2336.76	1551.9	1472.27	2145.13	1780.34	1548.03	3311.14	1252.93		63.2606	1910.96	1126.17	2025.1	1442.83	1261.73	1219.1		63.2606	712	1307	781	526	581	515	634		63.2606	543	501	560	709	522
63.5818	1969.24	1604.3	2375.11	1478.37	1427.8	2203.3	1664.47	1628.04	3096.9	1275.98		63.5818	2055.29	1129.27	1961.39	1499.47	1235.08	1159.28		63.5818	697	1205	781	487	539	546	628		63.5818	524	518	558	675	541
63.9029	1891.42	1671.18	2398.44	1429.1	1411.41	2299	1566.05	1637.78	2875.38	1256.52		63.9029	2217.34	1192	1923.41	1539.45	1172.06	1146.62		63.9029	762	1121	761	464	550	523	591		63.9029	507	499	549	688	545
64.224	1781.44	1660.72	2410.71	1432.14	1395.86	2335.72	1519.15	1549.16	2668.88	1251.85		64.224	2286	1265.57	1918.57	1523.15	1132.57	1198.99		64.224	813	1063	747	463	546	488	568		64.224	526	469	550	704	508
64.5451	1645.97	1624.87	2419.72	1490.59	1381.16	2234.18	1494.47	1431.88	2552.77	1290.5		64.5451	2252.82	1295.99	1901.08	1476.34	1088.57	1274.16		64.5451	784	1016	717	470	509	478	592		64.5451	561	457	563	659	452
64.8662	1505.57	1604.14	2423.95	1549.58	1370.05	2067.04	1473.05	1351.21	2535	1308.05		64.8662	2222.4	1319.99	1805.81	1467.78	1011.23	1328.76		64.8662	772	964	680	455	452	467	599		64.8662	555	470	593	591	406
65.1874	1409.97	1511.8	2428.61	1587.67	1356.07	1974.98	1479.83	1282.38	2516.78	1306.35		65.1874	2256.65	1382.16	1674.33	1483.54	989.64	1341.76		65.1874	739	914	690	446	430	448	555		65.1874	510	488	612	543	382
65.5085	1408.28	1376.38	2382.64	1614.91	1348.42	1953.67	1501.27	1227.03	2478.07	1327.66		65.5085	2265.77	1450.26	1608.45	1495.44	1041.17	1352.88		65.5085	666	874	718	474	447	440	514		65.5085	474	467	588	528	403
65.8296	1481.05	1315.48	2296.15	1581.8	1337.65	1908.42	1494.59	1219.57	2445.13	1334.91		65.8296	2101.5	1486.41	1544.81	1496.49	1082.46	1378.52		65.8296	615	842	679	509	444	460	533		65.8296	475	434	548	535	464
66.1507	1497.01	1286.87	2268.4	1454.64	1286.82	1800.2	1482.58	1232.09	2453.22	1284.98		66.1507	1856.1	1500.09	1424.65	1445.56	1082.46	1329.65		66.1507	577	837	602	509	423	476	590		66.1507	488	440	524	544	511
66.4718	1405.19	1204.44	2290.34	1329.46	1211.3	1661.17	1448.62	1224.15	2541.06	1199.95		66.4718	1747.17	1491.32	1322.38	1377.06	1049.47	1205.27		66.4718	552	867	544	477	397	488	625		66.4718	488	459	500	560	504
66.793	1334.09	1096.86	2223.1	1286.43	1175.25	1545.34	1370.83	1203.6	2596.45	1137.7		66.793	1741.43	1444.66	1273.93	1364.47	987.246	1119.29		66.793	550	889	499	439	386	533	616		66.793	482	482	482	573	477
67.1141	1373.47	1009.19	2008.57	1263.44	1183.21	1514.97	1322.45	1195.59	2483.68	1125.21		67.1141	1730.03	1387.92	1273.11	1405.6	940.688	1102.07		67.1141	590	889	461	405	370	624	593		67.1141	483	523	486	565	454
67.4352	1472.11	946.793	1777.9	1224.33	1170.56	1578.18	1306.93	1160.77	2308.05	1150.08		67.4352	1753.52	1360.58	1283.94	1439.41	957.444	1092.63		67.4352	636	829	446	396	372	687	562		67.4352	479	570	506	568	438
67.7563	1508.57	929.502	1659.52	1180.64	1119.87	1652.48	1294.82	1083.66	2238.25	1164.37		67.7563	1801.52	1317.55	1286.34	1395.23	1004.02	1060.21		67.7563	634	750	451	420	406	684	535		67.7563	449	564	542	613	430
68.0774	1418.71	973.823	1608.45	1128.72	1093.45	1668.36	1307.46	1050.77	2206.27	1125.81		68.0774	1747.85	1235.4	1316.1	1306.45	1026.18	1047.59		68.0774	627	724	451	451	427	665	513		68.0774	436	513	584	668	419
68.3986	1250.45	996.475	1519.61	1070.69	1097.41	1630.18	1331.34	1066.89	2174.45	1065.58		68.3986	1590.09	1168.92	1350.85	1277.93	1022.55	1079.97		68.3986	642	717	446	463	414	658	511		68.3986	450	479	629	668	408
68.7197	1079.24	938.93	1408.71	1004.61	1086.23	1590.91	1341.59	1055.73	2195.05	1020.82		68.7197	1436.26	1139.69	1324.55	1275.42	1027.93	1121.58		68.7197	641	711	440	440	419	683	530		68.7197	429	482	645	604	416
69.0408	938.523	875.018	1356.77	976.917	1056.06	1586.45	1318.76	1017.68	2192.51	1006.24		69.0408	1330.46	1102.72	1232.69	1234.36	1062.03	1146.07		69.0408	629	729	431	419	447	704	521		69.0408	387	502	634	530	440
69.3619	853.669	834.696	1361.67	1030.45	1021.7	1561.99	1262.64	1003.01	2074.27	1012.21		69.3619	1273.93	1030.98	1119.91	1177.64	1100.25	1146.94		69.3619	619	738	428	413	471	641	488		69.3619	374	492	644	495	461
69.683	820.588	794.35	1384.42	1113.28	961.695	1461.85	1223.99	1015.23	1895.22	1011.99		69.683	1247.77	971.972	1053.99	1122.14	1087.73	1125.77		69.683	601	700	432	406	472	537	443		69.683	391	442	645	492	443
70.0042	811.203	770.397	1375.43	1165.59	872.84	1335.06	1215.6	1035.79	1794.41	1018.19		70.0042	1202.63	970.584	1074.97	1083.81	1031.83	1104.01		70.0042	582	687	429	391	449	460	423		70.0042	407	406	618	507	405
70.3253	807.398	789.518	1314.35	1155.54	803.9	1255.26	1194.89	1034.86	1821.81	1041.55		70.3253	1140.5	1008.51	1122.14	1078.57	1000	1100.75		70.3253	574	711	407	390	433	409	458		70.3253	393	396	593	507	393
70.6464	811.17	814.189	1249.2	1055.74	771.83	1279.03	1160.28	1002.94	1898.59	1060.36		70.6464	1132	1054.82	1141.38	1109.59	999.207	1148.88		70.6464	580	711	378	429	442	361	524		70.6464	365	378	597	502	381
70.9675	817.973	802.186	1197.06	931.477	765.421	1384.99	1161.6	968.159	1901.03	1065.03		70.9675	1204.65	1091.71	1160.79	1149.92	977.871	1229.63		70.9675	591	695	338	473	448	320	572		70.9675	363	369	587	515	369
71.2886	818.641	765.67	1169.96	875.428	754.745	1450.86	1185.18	939.78	1769.45	1026.62		71.2886	1263.07	1074.48	1188.54	1118.51	927.346	1254.31		71.2886	555	709	300	473	456	290	569		71.2886	378	380	538	531	389
71.6097	809.911	735.736	1172.61	897.663	746.306	1402.94	1168.21	909.515	1553.92	941.465		71.6097	1205.72	986.98	1179.52	1019.98	892.302	1173.37		71.6097	507	715	301	464	472	296	541		71.6097	389	383	523	549	401
71.9309	807.848	722.101	1164.2	964.461	764.696	1284.54	1123.8	868.676	1365.93	899.068		71.9309	1084.28	879.572	1158.17	959.322	877.592	1041.66		71.9309	496	676	333	451	462	323	542		71.9309	378	385	557	580	383
72.252	832.142	702.023	1153.94	1009	769.411	1172.94	1099.22	831.07	1265.81	944.273		72.252	1007.35	798.481	1158.84	953.165	857.458	932.221		72.252	498	648	347	431	436	333	562		72.252	356	399	592	604	371
72.5731	853.293	672.654	1170.15	994.307	718.227	1114.33	1093.36	814.68	1218.92	1040.12		72.5731	1013.75	765.707	1156.61	956.547	852.12	859.281		72.5731	478	649	342	434	429	342	538		72.5731	361	404	599	647	378
72.8942	834.753	665.236	1182.53	950.592	659.449	1097.08	1076.76	816.776	1183.83	1075.51		72.8942	1092.28	782.707	1154.08	972.477	868.465	820.684		72.8942	457	638	325	456	450	329	470		72.8942	383	383	595	673	378
73.2154	794.362	669.316	1157.11	909.181	662.473	1084.8	1052.03	834.436	1178.65	981.251		73.2154	1163.82	811.436	1137.2	1001.28	873.233	799.414		73.2154	464	621	308	488	467	297	435		73.2154	400	367	581	622	371
73.5365	750.727	660.418	1134.94	889.273	727.928	1072.67	1031.42	849.527	1204.73	850.671		73.5365	1181.82	852.874	1090.18	1006.13	895.292	780.182		73.5365	475	603	297	557	474	275	428		73.5365	417	375	531	546	381
73.8576	724.859	651.099	1115.93	859.848	774.958	1078.9	1028.56	844.776	1192.71	770.65		73.8576	1202.83	928.418	1019.2	974.848	966.08	767.916		73.8576	477	620	289	633	479	266	426		73.8576	423	391	454	504	409
74.1787	721.107	642.321	1077.86	809.962	737.06	1075.18	1036.38	814.069	1147.02	734.913		74.1787	1241.77	972.699	953.477	926.855	1040.82	754.971		74.1787	473	679	284	656	483	259	450		74.1787	442	397	411	505	428
74.4998	697.264	618.674	1051.12	770.313	674.706	1057.59	1026.44	770.936	1122.59	716.984		74.4998	1271.65	922.529	926.115	910.294	1073.87	755.278		74.4998	461	720	291	647	498	275	455		74.4998	456	390	405	506	421
74.821	641.602	583.363	1044.25	743.117	663.252	1022.97	987.227	744.994	1100.74	721.385		74.821	1272.74	816.46	917.369	933.76	1037.09	784.272		74.821	445	715	309	644	519	281	423		74.821	393	388	404	479	405
75.1421	606.748	559.514	1018.19	728.131	650.927	955.713	935.301	727.15	1073.03	745.971		75.1421	1260.12	724.096	909.121	944.767	933.771	842.67		75.1421	448	689	298	636	502	280	404		75.1421	313	399	405	473	415
75.4632	619.166	560.56	967.135	718.673	619.162	901.068	917.188	711.023	1043.11	767.327		75.4632	1274.65	659.485	910.256	903.992	826.364	887.35		75.4632	470	691	271	627	471	314	406		75.4632	289	416	430	503	427
75.7843	639.853	586.117	924.771	709.112	611	878.959	938.041	705.629	1021.34	780.223		75.7843	1281.18	651.676	903.812	812.201	758.918	872.989		75.7843	466	724	273	631	494	331	397		75.7843	289	438	473	542	401
76.1054	634.145	602.417	885.92	716.166	597.717	851.134	937.086	705.369	1041.76	765.92		76.1054	1215.78	708.042	911.604	734.348	729.834	812.434		76.1054	467	719	292	630	564	301	393		76.1054	281	452	468	557	387
76.4266	613.857	598.367	845.449	718.755	569.49	812.244	915.735	698.285	1055.24	714.428		76.4266	1122.75	767.388	991.431	717.98	717.326	755.612		76.4266	482	701	311	623	575	279	404		76.4266	275	431	418	515	405
76.7477	610.852	596.805	824.611	694.467	569.51	796.023	923.218	668.541	1019.64	664.004		76.7477	1059.79	776.759	1112.55	730.732	703.685	746.607		76.7477	473	716	333	639	513	293	407		76.7477	285	402	396	457	426
77.0688	616.63	578.434	807.532	661.168	592.919	831.039	938.734	627.255	988.63	626.347		77.0688	985.857	748.44	1133.68	724.717	693.549	771.19		77.0688	460	751	335	672	475	300	437		77.0688	292	409	417	440	466
77.3899	592.686	547.562	791	646.538	602.825	920.604	957.151	602.825	984.263	599.837		77.3899	891.997	728.187	1013.99	717.801	692.562	778.375		77.3899	454	756	325	696	468	282	488		77.3899	279	446	436	437	493
77.711	553.894	534.03	791.361	662.911	584.924	1014.74	959.48	592.142	997.219	589		77.711	822.953	727.527	869.049	738.828	664.232	760.811		77.711	450	707	319	726	446	269	513		77.711	270	469	431	421	479
78.0322	528.813	516.58	795.593	688.671	541.674	1063.62	900.02	574.251	1015.75	599.061		78.0322	780.22	725.891	780.064	737.878	624.173	707.942		78.0322	442	692	318	742	426	270	502		78.0322	285	467	436	422	451
78.3533	515.285	492.634	809.154	691.992	501.846	1076.5	805.44	556.13	1017.77	625.227		78.3533	751.342	692.106	760.577	674.098	602.699	628.968		78.3533	435	719	327	797	439	280	459		78.3533	303	454	453	433	413
78.6744	528.244	476.234	823.781	673.029	497.903	1062.38	711.292	525.619	995.522	635.014		78.6744	721.18	622.867	772.342	616.166	565.702	593.356		78.6744	439	757	317	862	447	295	446		78.6744	316	478	453	424	395
78.9955	569.953	453.719	828.063	651.81	521.09	1018.77	649.174	488.201	999.371	617.846		78.9955	690.91	562.074	797.244	605.9	509.857	584.783		78.9955	460	761	296	864	434	310	467		78.9955	319	529	447	421	389
79.3166	597.941	431.471	840.587	652.352	521.296	956.884	619.412	472.236	1050.41	589.943		79.3166	672.001	552.469	844.056	623.234	460.884	557.766		79.3166	457	781	283	835	411	312	482		79.3166	308	564	422	424	361
79.6377	581.246	421.838	877.564	656.974	477.977	936.269	604.677	460.92	1076.87	553.354		79.6377	650.461	568.703	879.351	654.998	434.649	538.297		79.6377	435	804	277	850	382	300	470		79.6377	300	556	392	410	341
79.9589	542.81	411.104	898.111	624.418	437.503	934.81	579.712	442.154	1050.56	530		79.9589	619.461	563.706	878.951	693.687	448.686	538.049		79.9589	418	738	281	854	341	283	454		79.9589	297	529	385	404	360
80.28	519.563	405.481	841.889	570.248	431.696	877.801	560.221	440.917	1041.01	541.834		80.28	585.121	553.392	893.359	722.392	486.79	548.006		80.28	404	656	280	798	313	272	470		80.28	294	562	398	423	384
80.6011	513.614	431.055	760.33	523.141	420.527	786.787	587.67	462.047	1056	577.512		80.6011	555.803	557.386	914.646	706.637	508.732	572.354		80.6011	384	646	287	772	320	267	498		80.6011	279	649	412	455	377
80.9222	509.621	479.76	720.103	492.172	392.862	736.793	622.724	482.379	1037.03	608.173		80.9222	551.518	560.69	847.341	663.379	507.862	588.621		80.9222	373	679	293	789	326	254	524		80.9222	253	699	413	506	359
81.2434	512.835	506.403	697.046	483.343	395.641	718.135	620.851	486.716	988.3	619.03		81.2434	557.538	576.073	712.154	660.387	487.3	569.524		81.2434	388	681	273	830	301	217	565		81.2434	235	709	413	552	338
81.5645	528.783	514.758	669.801	489.808	424.541	707.733	606.9	492.733	975.274	612.801		81.5645	537.043	609.491	621.359	694.883	453.776	522.285		81.5645	392	645	259	898	294	190	607		81.5645	232	726	424	560	313
81.8856	533.24	512.819	654.34	507.461	443.38	723.881	591.179	478.278	1005.16	583.059		81.8856	509.24	612.139	600.74	706.56	432.26	480.099		81.8856	369	608	273	887	312	215	599		81.8856	243	744	427	521	301
82.2067	519.262	482.14	650.6	520	448	746.692	568.216	421.048	1008.14	543.478		82.2067	497.293	597.4	601.57	680.094	418.57	438.387		82.2067	344	577	289	808	315	243	583		82.2067	251	751	413	473	298
82.5278	511.01	455.653	620.444	522.695	442.274	752.695	553	382.99	975.59	512.264		82.5278	490.316	619.473	580.243	634.517	392.864	393.243		82.5278	318	526	293	741	316	226	616		82.5278	247	759	395	462	295
82.849	516.352	456.687	558.893	536.38	424.966	762.693	548.307	389.38	956.977	494.977		82.849	486.665	632.927	570.375	593.262	363.648	380.358		82.849	303	489	291	711	346	209	667		82.849	244	781	382	463	309
83.1701	527.67	459.997	516.33	555.335	422.341	764.661	536.331	409.336	949.334	480.662		83.1701	474.658	586.317	591.005	551.654	376.682	389		83.1701	309	474	294	725	386	225	714		83.1701	233	800	368	457	330
83.4912	533.348	440.712	500.36	550.704	457.268	730.08	538.636	414.008	976.227	464.348		83.4912	440.712	536.368	603	509.372	436.584	386.344		83.4912	320	476	299	775	383	238	771		83.4912	240	858	342	462	329
83.8123	521.705	410.401	481.383	524.071	485.044	676.454	547.062	404.383	1057.74	454.027		83.8123	418.661	526.929	609.608	484.053	477.009	386.286		83.8123	333	493	300	809	349	234	853		83.8123	263	994	313	473	308
84.1334	508.068	389.74	474.274	504.383	459.219	647.356	520.835	382.15	1117.64	443.068		84.1334	424.274	543.658	627.274	469.041	470.726	408.836		84.1334	343	490	292	774	339	217	952		84.1334	264	1175	309	479	300
84.4546	485.568	374.092	497.396	491.438	417.185	635.166	493.383	355.092	1103.01	435.29		84.4546	426.129	532.24	629.129	470.852	461.346	438.235		84.4546	346	461	273	687	338	209	1028		84.4546	263	1212	337	474	291
84.7757	452.186	363.674	527.326	471.21	388.861	610.814	490.279	339.14	1030.84	449.116		84.7757	399.629	503.07	610.768	495.139	451.861	447.047		84.7757	348	439	261	612	325	219	1061		84.7757	275	1132	377	443	286
85.0968	436.324	374.014	516.662	442.309	360.338	600.268	491.113	320.845	938.887	469.296		85.0968	372.704	494.732	594.873	511.352	430.465	433.605		85.0968	345	449	265	571	302	218	1073		85.0968	282	1118	393	398	296
85.4179	437.967	412.15	488.809	413.875	328.586	614.026	470.106	315.092	898.678	466.198		85.4179	375.802	474.527	569.685	508.711	416.165	406.264		85.4179	344	469	278	517	274	202	1062		85.4179	267	1144	395	370	299
85.739	439.038	456.188	478.396	400.038	318.132	629.472	440.755	337.698	891.264	453.038		85.739	385.755	436.227	540.944	499.585	396.378	385.83		85.739	346	465	286	474	266	196	1016		85.739	245	1114	418	356	304
86.0602	431.894	486.787	473.723	398.957	336.978	595.831	437.596	349.851	866.788	445.256		86.0602	379.085	432.936	522.809	485.362	367.703	370.617		86.0602	362	458	283	465	276	196	973		86.0602	226	1090	446	372	310
86.3813	420.047	490.65	475.763	400.682	356.54	522.536	444.175	338.46	846.905	425.062		86.3813	383.573	459.303	517.905	482.095	345.555	356.682		86.3813	403	452	287	461	282	166	922		86.3813	223	1102	444	412	314
86.7024	425.898	470.998	479.998	398.104	362.632	484.684	457.95	340.582	857.634	411.791		86.7024	412.741	474.368	517.577	465.995	335.052	370.848		86.7024	433	432	300	436	276	126	836		86.7024	248	1017	425	406	299
87.0235	442.686	454.228	450.027	396.2	360.543	473.942	475.514	364.229	869.8	423.772		87.0235	438.514	460.742	492.599	437.171	335.829	419.344		87.0235	412	409	298	381	276	132	757		87.0235	272	897	408	366	282
87.3446	433.557	434.117	409.248	402.564	348.309	437.928	480.687	379.375	860.622	427.935		87.3446	437.433	418.365	446.805	438.192	347.629	451.873		87.3446	381	404	285	355	283	168	758		87.3446	247	812	424	347	287
87.6657	418.422	401.156	404.733	410.044	339.244	405.756	475.645	368.978	849.445	417.133		87.6657	417.089	374.978	413.467	455.555	357.822	436.289		87.6657	388	424	279	359	280	189	818		87.6657	211	725	436	349	274
87.9869	433.428	384.762	411.143	421.476	348.19	406.095	457.334	338.168	836.406	408.358		87.9869	400.905	351.286	393.12	450.953	344.644	406.787		87.9869	385	411	281	378	277	201	848		87.9869	220	661	428	339	250
88.308	449.384	376.766	402.998	417.456	363.232	413.924	427.224	311.229	795.604	388.764		88.308	385.995	345.771	376.613	423.456	320.458	368.606		88.308	361	357	286	407	283	196	819		88.308	248	578	439	341	245
88.6291	448.613	362.856	393.694	384.055	357.424	413.244	394.731	307.144	733.624	362.487		88.6291	360.343	358.738	369.613	392.506	311.982	327.875		88.6291	360	319	290	389	289	161	795		88.6291	250	526	436	360	268
88.9502	453.656	356.172	387.211	358.219	334.344	399.383	376.305	309.258	691.391	346.344		88.9502	339.039	376.742	374.047	373.742	321.609	319.484		88.9502	381	303	295	339	279	127	846		88.9502	227	512	409	369	287
89.2713	462.606	346.545	365.818	368.879	329.334	373.211	380.94	299.969	694.546	334.666		89.2713	326.06	386.334	384.637	397.274	319.06	336.243		89.2713	389	293	294	301	250	121	936		89.2713	213	481	405	352	271
89.5925	460.383	332.493	345.493	383.383	342.426	349.684	388.191	292.699	704.096	327		89.5925	316.699	393.699	395.412	448.756	309.397	341.177		89.5925	394	285	305	297	227	136	966		89.5925	242	461	419	337	259
89.9136	449.002	337.096	343.499	365.705	357.399	339.601	379.502	291.1	694.504	331.198		89.9136	326.494	392.4	401.9	469.104	308	330.9		89.9136	389	275	316	325	226	166	950		89.9136	273	476	418	357	259
90.2347	440.211	360.175	351.175	340.719	357.632	325.948	365.123	286.912	655.826	343.684		90.2347	360.842	391.895	399.228	438.088	310.088	339.859		90.2347	397	272	318	363	236	158	921		90.2347	257	477	425	366	263
90.5558	436	361.991	369.305	345.458	340.551	298.695	365.195	282	582.27	341.991		90.5558	377.771	388.661	381.474	393.508	318.559	351.254		90.5558	414	285	317	360	255	128	872		90.5558	218	470	437	337	271
90.877	434.525	333.559	392.245	393.881	324.985	276.935	404.996	286.72	511.839	312.379		90.877	348.839	373.64	362.165	366.87	328.475	326.134		90.877	410	298	327	322	271	121	838		90.877	208	437	445	319	276
91.1981	429.24	308.066	403.227	442.521	307.719	274.641	448.293	301.814	466.264	284.066		91.1981	307.078	366.826	350.946	359.054	327.305	286.838		91.1981	425	309	342	313	272	121	843		91.1981	224	403	470	317	285
91.5192	421.207	301.292	417.42	439.036	293.833	281.292	439.954	306.331	437.125	283.128		91.5192	286.833	359.623	343.666	368.961	306.954	275.502		91.5192	452	305	320	332	265	114	888		91.5192	232	428	498	318	286
91.8403	406.777	302	434.161	400.133	291.871	279.969	416.839	296.451	441.965	306.125		91.8403	284.58	349	335.969	385.353	277.455	291.255		91.8403	460	299	287	342	251	116	991		91.8403	212	458	507	339	276
92.1614	395.732	303.732	430.363	371.671	291.403	273.268	413.134	306.637	459.289	326.866		92.1614	290.617	346.114	334.752	395.134	260.732	312.463		92.1614	475	291	306	332	241	124	1075		92.1614	168	443	488	353	285
92.4826	402.009	313.74	402.521	361	281.269	267.278	404.113	322.426	456.269	330.722		92.4826	304.009	341.009	354.044	389.843	269.305	316.695		92.4826	530	274	365	305	235	126	1089		92.4826	127	403	495	335	287
92.8037	397.583	331.71	356.592	362.712	268.576	268.422	376.441	315.007	446.144	337.854		92.8037	305.861	359.983	380.427	381.715	283.995	302.576		92.8037	599	267	389	290	226	143	1088		92.8037	127	350	521	330	266
93.1248	365.771	336.744	309.027	362.744	258.865	295.053	348.581	292.338	446.838	343.014		93.1248	300.27	411.174	378.041	376.744	298.824	292.014		93.1248	617	282	381	287	228	161	1065		93.1248	155	323	526	341	245
93.4459	343.871	320.075	308.311	342.125	254.871	336.465	349.514	266.793	455.975	336.589		93.4459	313.054	457.079	353.689	359.228	313.822	285.307		93.4459	578	301	361	274	233	158	1012		93.4459	178	323	530	348	235
93.767	343.805	308.647	337.05	309.706	253.403	349.584	358.475	249.036	461.281	335.525		93.767	332.403	460.742	326.072	337.231	317.914	286.05		93.767	569	290	330	264	242	157	979		93.767	184	329	500	348	244
94.0882	354.626	324.695	344.7	288.49	261.184	316.564	347.816	248.742	462	341.442		94.0882	329.305	428.911	319.068	322.768	307.49	301.789		94.0882	582	272	313	265	235	152	998		94.0882	196	323	444	326	252
94.4093	371.765	340.613	323.512	278.117	273.387	285.336	336.168	265.992	461.723	335.84		94.4093	308.395	400.789	322.84	315.891	298.227	307.891		94.4093	565	265	317	270	209	155	1092		94.4093	221	321	402	296	251
94.7304	393.103	331.21	301.794	264.14	277.551	284.584	334.827	275.416	455.761	323.621		94.7304	303.687	374.004	307.037	314.379	284.383	305		94.7304	526	265	338	270	192	159	1228		94.7304	240	328	398	287	244
95.0515	392.436	316	294.904	254	278.452	298.934	342.208	262.711	435.421	323.564		95.0515	319.289	346.969	297.289	322.112	264.807	301.162		95.0515	499	266	349	284	198	144	1292		95.0515	228	318	408	303	221
95.3726	387.633	316	289.275	255.635	276.455	314.453	364.72	253.182	411.732	335.998		95.3726	325.275	326.367	313.358	330.82	263.905	282.28		95.3726	491	265	355	298	225	118	1285		95.3726	193	301	412	304	207
95.6937	407.314	311.666	283.625	262.98	270.936	319.375	386.104	250.458	392.562	340.478		95.6937	311.227	314.813	334.625	322.833	279.438	260.625		95.6937	505	256	364	286	265	101	1273		95.6937	159	319	420	293	222
96.0149	425.654	295.961	290.424	273.693	252.191	316.616	377.768	251.424	388.424	327.23		96.0149	287.345	324.54	335.768	320.501	286	278.195		96.0149	526	232	366	269	273	91	1230		96.0149	128	355	412	296	239
96.336	418.252	282.591	294.055	279.929	224.843	324.748	370.071	262.551	397.945	317.803		96.336	271.732	344.197	327.535	333.212	283.859	314.268		96.336	515	218	351	253	241	90	1278		96.336	119	370	376	292	227
96.6571	409.596	274.67	280.412	275.137	201.082	330.743	370.871	274.468	409.193	325.322		96.6571	273.927	330.825	329.532	340.67	279.863	307.284		96.6571	501	224	341	251	209	109	1406		96.6571	136	348	371	283	203
96.9782	415.851	266.504	265.529	272.645	178.562	313.182	365	271.149	414.826	342.909		96.9782	285.967	289.95	330.471	337.529	291.347	287.322		96.9782	473	246	367	259	201	164	1437		96.9782	166	308	404	284	191
97.2993	413.114	246.64	271.206	283.68	169.526	294.109	363.949	268.366	398.64	350.474		97.2993	299.366	261.211	324.006	342.68	308.211	288.897		97.2993	448	283	401	257	238	204	1332		97.2993	171	299	408	292	202
97.6205	384.469	227.306	280.649	295.829	168.91	287.306	357.081	273.432	377.216	355.531		97.6205	304.432	264.225	303.207	356.919	305.216	275.424		97.6205	430	289	403	243	263	183	1237		97.6205	143	331	402	309	208
97.9416	366.26	238.27	265.691	306.712	161.442	295.154	347.039	265.884	387.463	383.347		97.9416	299.221	280.818	282.442	371.895	306.375	255.818		97.9416	437	251	380	238	229	154	1252		97.9416	146	369	436	321	195
98.2627	366.484	258.742	239.678	326.871	152.355	310.354	346.904	253.387	430.999	403.291		98.2627	293.129	279.033	279.548	384.032	313.936	267.193		98.2627	462	222	378	272	222	152	1294		98.2627	186	396	448	326	174
98.5838	361.154	255.692	235.051	332.102	135.41	321.026	332.615	239.923	446.051	373.23		98.5838	274.82	254.384	283.487	384.949	307.487	285		98.5838	459	236	409	291	259	174	1329		98.5838	216	403	412	334	148
98.905	341.336	249.255	243.293	306.336	130.096	323.236	312.668	230.745	416.884	336.649		98.905	248.394	238.197	281.745	372.375	308.039	276.081		98.905	465	257	451	260	283	199	1333		98.905	219	393	386	339	156
99.2261	309.67	249.24	256.837	279.227	150.824	318.721	299.747	231.773	393.936	315.936		99.2261	232	224.429	284.039	346.67	308.936	240.125		99.2261	480	241	466	225	293	178	1248		99.2261	195	379	376	321	190
99.5472	290.497	247	284.045	276.264	169.761	308.477	304.284	238.258	371.703	298.232		99.5472	233.761	206.994	295.013	323.974	292.994	210.748		99.5472	486	205	473	222	313	150	1151		99.5472	174	385	369	296	198
99.8683	288.75	248.75	304	280.5	175.75	300.5	321.5	243.25	351.5	286.5		99.8683	240	205	298.25	308.5	292.75	212.75		99.8683	494	188	498	250	320	165	1098		99.8683	174	382	364	278	186
																				100.189	463	192	508	257	320	190	1083		100.189	179	350	351	266	195
