# Supplementary material for: Control of plant cell fate transitions by transcriptional and hormonal signals
Source: eLife journal article supplement (doi:10.7554/elife.30135), 2017-10-23
Supplement: supp [file elife-30135-supp-v1.zip › elife_poa_e30135_Figure_10_source_data_2.xlsx]

## Sheet: Fig10_sup1E
Cell surface area MorphographX
Col-0_NL	hec1,2,3_NL	Col-0_LL	hec1,2,3_LL
18.5562	18.5974	27.7775	25.6591
18.8286	23.7294	39.2607	29.7162
21.2763	26.3079	25.761	6.23201
29.4703	24.4226	17.7894	19.0002
29.5158	27.2315	23.2102	22.9289
26.7691	30.1684	25.0326	32.5213
34.3262	17.4391	17.4356	19.9241
32.1786	26.5613	17.0182	18.3079
21.0781	22.4216	23.2669	34.3895
23.4909	19.0398	18.9712	14.0304
12.1673	32.6474	39.2618	29.4916
25.0457	44.0008	27.5711	35.4931
42.6373	26.5185	20.3245	19.9191
36.2414	7.45298	23.6779	21.9837
17.5152	24.3508	24.6036	22.9465
16.3808	25.1976	30.9215	18.1436
41.5342	15.8185	23.2576	43.8086
20.3422	19.8619	24.6176	23.7592
14.3313	25.6353	17.6032	29.4558
25.7234	21.6912	27.2126	20.6688
15.1869	26.3904	36.9053	25.9249
31.6116	27.1934	17.1175	17.3386
20.344	26.9187	16.0365	12.9888
27.4468	27.3221	24.2252	19.1128
24.4221	23.937	20.8574	26.0614
26.6785	20.6154	22.2697	41.5632
28.4731	30.4635	23.0974	14.1922
33.9333	23.144	28.1117	27.2439
30.0104	27.9734	18.634	0.112561
32.3099	25.8016	35.5917	33.5315
25.0386	27.3209	12.2183	35.1032
19.5768	26.9918	40.5522	25.9809
13.7266	17.2745	37.0456	25.8259
31.1909	30.8338	28.2365	24.5521
15.6049	17.5289	30.5677	22.6515
28.7672	24.7101	21.7952	14.4434
25.9844	15.3209	20.9625	26.056
23.1167	24.2743	29.6175	19.6376
32.771	17.3756	30.0244	35.1154
16.2438	22.9618	44.6642	17.2786
23.0685	19.6893	13.8832	25.0865
17.9835	31.8092	21.8483	26.0939
29.0854	30.8682	34.2222	29.0246
26.7685	19.803	16.3777	19.6002
27.2284	13.4692	25.7978	15.7208
46.685	14.9011	22.076	31.1303
21.5442	25.2676	20.3446	37.324
32.4957	25.8918	24.421	30.2346
21.4658	23.3371	25.0017	31.3983
35.6659	40.6737	34.1274	20.9856
31.8001	21.081	21.4853	11.7984
30.7785	24.6433	37.025	34.4649
35.3697	35.917	22.2222	19.6425
49.2952	24.4466	18.5812	31.2075
36.207	20.7037	24.3266	26.984
26.3327	36.0818	24.4963	12.4042
25.827	30.9837	19.1473	36.3602
24.6118	21.1065	27.564	16.3583
22.8029	20.2848	26.7989	16.0436
51.6601	29.3393	22.1434	35.8833
21.5688	35.7899	25.3121	15.3651
23.9375	21.2477	30.5982	26.0229
36.7885	36.1668	18.8582	27.3908
26.0645	20.5997	19.6056	23.5668
20.5285	27.9573	16.408	20.5785
41.2805	23.6663	18.7787	17.4225
28.819	25.8536	19.8282	15.394
22.1644	33.0962	23.6491	17.039
34.0456	20.2767	19.62	43.4801
18.5463	28.5412	24.0755	37.1791
50.6308	26.6455	22.83	32.9272
32.6555	22.7052	23.987	26.0503
18.4604	18.0317	39.1653	15.808
30.5099	28.1743	20.5563	28.5457
29.5192	32.4647	30.4561	18.1832
26.3966	19.7823	23.4375	33.6975
19.6846	16.3883	36.3508	26.0961
36.7473	31.6363	14.2665	31.6342
35.3051	18.3063	26.1392	22.3656
38.6835	20.1776	19.1618	23.8767
15.6191	27.3073	42.0005	20.8831
24.7524	39.5342	17.5543	26.9271
25.51	18.9742	25.8783	23.0557
19.8121	28.6495	30.4882	31.0203
24.9191	26.3208	14.0132	29.9307
25.4426	25.8231	36.631	23.534
18.6836	25.0258	25.5057	35.1801
22.4677	23.0804	39.2785	18.301
20.9244	22.7005	25.5322	25.6576
24.9842	21.2147	46.9705	16.6328
26.1768	29.2997	11.6844	18.1972
20.3364	20.8315	19.8703	29.0537
22.3991	16.7799	29.8685	23.3979
45.6571	17.2627	18.8718	11.6911
32.4785	30.0503	28.0172	33.5582
23.7126	23.5781	40.2789	34.2523
42.3147	22.8462	26.3485	20.5343
35.959	26.802	25.1202	19.0418
20.2034	22.1031	24.645	24.9723
20.0386	32.4353	24.9716	43.0568
25.2443	19.0279	27.9413	19.3275
25.566	15.5984	25.8228	19.1835
24.8786	16.6249	23.5408	10.723
44.6076	17.6464	41.9338	32.8006
33.1629	14.4872	29.3149	22.4994
17.0775	14.1716	19.4531	29.9628
25.5179	11.8474	20.3545	27.3549
31.2112	27.995	29.2738	24.5551
15.2029	13.1067	31.4254	20.8762
36.3144	15.0492	18.5357	19.4407
16.6193	13.2525	29.5928	22.2184
32.0559	26.9732	33.6739	29.8607
30.518	13.3227	35.0599	30.165
27.5112	15.1167	34.0885	26.3901
25.8599	24.9051	19.3129	18.0873
22.2441	18.9342	25.4481	28.9265
28.1193	20.5555	45.2041	15.2641
20.1635	16.1474	25.2811	28.3729
18.3804	21.3452	24.3474	23.4902
22.9016	18.2567	38.301	21.5453
21.8247	14.901	34.6887	25.4704
20.0603	12.5798	17.461	21.7597
13.8878	8.36077	19.0344	14.175
12.0405	15.0557	9.42978	43.5763
29.7868	10.1447	18.854	22.1254
27.1342	26.5216	25.317	29.0271
18.6724	21.05	29.1406	14.9015
24.0482	11.4723	18.7237	19.9747
6.97824	22.5058	22.9376	25.3882
21.0024	18.4244	11.25	36.4305
27.2433	9.40003	19.6718	32.6328
34.3858	14.251	15.1338	20.9452
17.9071	13.7844	23.2121	30.3824
30.7483	28.1858	23.9155	10.2081
14.7778	20.3102	20.8042	17.2667
16.7614	9.5003	16.0979	34.4553
15.8143	14.5426	13.9593	28.8877
20.7929	31.3694	16.8148	26.4339
17.741	23.1861	23.2733	14.8609
20.2744	25.7907	28.6914	26.5746
17.5075	31.5973	33.4374	23.9369
27.8985	36.786	31.8742	22.1888
18.6751	36.1287	16.8446	32.1851
8.37084	23.1167	12.9102	22.8408
11.9074	25.1789	15.1483	29.4934
21.4922	22.3287	23.7359	26.3846
23.9383	34.6048	30.7076	19.8256
18.1418	26.9295	24.7765	11.9469
16.5996	32.6646	16.2426	17.4515
12.0938	17.5859	18.3926	16.5644
10.0954	23.5187	22.6352	22.5948
12.9901	35.978	23.2388	12.1974
20.3323	29.2115	22.0728	15.4629
26.6394	18.3285	17.6507	31.773
16.1893	27.5017	34.327	21.7404
20.9462	32.1997	24.1724	14.8277
14.3646	32.1323	19.7173	14.4182
10.2752	19.1157	18.595	9.73597
19.5335	30.8103	43.5736	9.02184
21.7844	27.7812	30.4817	16.621
10.8026	26.286	10.2104	20.5487
7.86771	30.3868	18.2756	33.2166
26.3026	20.3701	28.3848	17.5769
30.771	33.6964	21.6177	17.8159
17.5127	16.7152	27.8413	23.2862
19.5119	15.6337	28.89	25.4567
10.4668	16.7055	15.0999	12.2695
16.4744	20.9543	20.7475	34.2149
28.1379	21.8901	25.0572	32.8012
29.3594	27.9933	31.2138	24.7668
25.3624	26.8932	37.6168	20.6739
9.98897	23.1456	35.3724	17.1893
17.6859	31.5274	24.9053	20.5971
19.6314	39.5233	24.7532	20.3912
13.4112	21.5869	16.926	38.0738
13.6055	85.7231	27.6467	28.4286
12.177	19.1001	27.6558	33.3773
12.3005	34.0635	18.5711	30.2121
12.2174	24.2405	29.0353	35.5595
11.1022	19.0044	22.3012	32.1045
17.0786	25.4737	24.3985	19.1926
19.8431	25.6561	36.3126	31.1916
17.1253	23.9985	29.3438	35.0407
14.9833	39.5886	20.7109	33.7197
17.1312	40.4866	16.0874	32.0259
14.1997	17.5294	21.2377	23.4545
30.3609	20.1973	30.5393	26.5938
29.8779	21.8463	40.1122	20.5206
19.4636	28.0983	28.5998	13.2993
22.9428	42.3255	20.192	32.1986
24.5658	24.8772	22.6643	30.4784
6.68435	26.3838	18.2491	28.5666
18.3646	38.2838	43.1607	20.7606
26.2667	20.7851	20.2635	21.1898
18.4229	23.4288	18.4564	20.9133
14.8072	17.2186	27.3775	32.9766
27.2334	25.153	36.6924	14.5301
28.4442	23.5515	32.894	35.2663
17.375	32.941	34.8395	27.4857
27.8994	19.1931	34.3224	33.4838
32.0799	34.0225	31.4672	35.8005
27.812	28.8526	43.1928	30.5848
26.066	29.4173	28.6743	22.5607
25.7313	18.2504	24.8265	28.5196
24.7515	31.468	18.84	25.6561
23.7015	18.7605	11.3471	27.4729
31.1997	23.8891	25.2136	25.9303
17.9753	18.7771	25.0871	28.0787
23.1589	17.3166	27.7281	9.54353
23.1379	24.8147	30.7677	21.7535
26.3448	29.3692	45.9842	21.7083
39.6308	26.747	22.0997	12.3617
27.4607	32.3853	19.8526	24.4752
27.2875	12.105	24.1045	34.899
20.6993	17.0944	32.3012	18.0709
13.2872	25.4329	18.4034	19.4209
23.548	21.37	28.8212	22.9068
19.3313	27.1401	31.6944	20.3047
24.1401	27.6672	15.9014	19.8397
23.9108	19.9739	29.0791	17.6162
24.4122	27.2379	25.8645	23.298
22.3446	16.8448	24.8938	22.3285
24.1274	20.9493	25.7661	28.3237
22.2097	23.9094	14.3778	27.4808
21.4837	28.8611	30.6962	22.9162
19.5441	41.5983	23.3502	37.1424
15.9834	23.1165	9.48107	35.9705
15.0619	26.8434	27.2724	28.7885
25.0157	30.2183	20.9704	12.8784
20.4137	15.7963	24.4874	22.8855
21.0935	22.7382	21.1215	35.6683
30.5699	43.3832	25.0889	37.284
24.5573	24.7264	22.9827	26.1772
24.5175	26.4964	41.1539	29.5169
14.8922	31.3241	21.5085	32.4905
17.9222	21.7249	29.3337	29.6807
24.8947	28.5279	30.5901	20.0116
25.3527	18.2755	28.4339	32.9853
22.2331	21.657	28.4999	22.2886
27.5512	26.5504	13.1748	26.1924
25.3927	35.3346	9.02112	23.641
24.2082	28.1062	16.4616	19.8328
29.6742	23.8795	29.2448	17.5452
20.8014	32.0822	16.4123	25.7972
20.1434	32.2786	16.826	25.9255
30.0788	20.5778	17.0362	27.5092
18.5034	18.1421	22.2448	26.0495
24.2184	10.2183	29.4045	16.6449
27.2425	19.2241	23.9268	35.078
24.1923	12.4006	20.3877	32.1926
28.5921	15.3761	22.8237	14.7023
24.5208	20.1925	21.5688	25.3117
27.1479	25.4364	11.4609	33.7016
37.0089	12.632	17.4014	32.0791
27.2708	21.7784	13.6892	22.8431
22.9261	24.6518	10.0537	21.142
12.2581	26.0321	22.3321	19.8585
23.9182	17.1367	18.0586	31.3888
18.8692	13.7477	25.09	37.7421
27.885	21.1553	18.2517	18.0162
25.2985	18.6902	23.087	24.0982
18.1635	15.6129	19.4478	17.3808
20.6685	10.5575	10.7375	22.7768
25.7659	14.7033	45.5464	29.3376
24.3611	6.92634	32.1305	24.0516
33.2409	11.5614	27.115	40.5595
10.8162	15.9096	26.6107	23.6368
15.397	9.87211	13.378	18.2974
16.5937	16.5803	22.2226	29.0405
25.1236	13.2244	12.4817	23.774
13.4078	8.61074	36.5612	28.4303
13.1075	25.0959	34.3558	35.8355
34.0959	23.3869	27.3898	36.516
36.8585	21.1341	16.9102	29.995
22.525	20.4229	20.3173	17.6584
25.0375	16.6404	28.662	18.0751
22.5572	19.2507	21.8781	36.6545
17.9259	14.8427	24.0747	19.9711
19.5623	11.6509	23.8874	28.8247
16.0152	22.0668	24.927	33.5106
12.8792	25.6136	40.1188	27.4153
10.3435	30.8094	23.3144	17.768
24.4414	28.793	27.4546	18.9161
21.3198	36.513	31.135	19.8428
16.6776	20.6803	23.9051	15.4453
12.6826	28.4815	42.1434	29.5807
11.9891	29.6607	21.4703	17.7782
6.7023	25.6296	15.9884	18.9184
12.4646	27.5149	21.8999	31.0775
20.8679	27.8682	29.1009	20.5587
34.949	18.1874	26.9785	27.2177
25.0387	21.4914	27.732	13.387
28.5208	17.1472	27.4029	28.1159
25.0822	28.0411	30.1603	12.2756
25.024	23.9551	20.0252	29.4444
22.1384	21.3681	15.2011	25.1869
29.2913	21.0426	23.0636	17.5411
24.1749	36.0221	23.81	14.7397
26.5477	27.9781	24.8382	25.316
31.0884	32.0043	13.1635	18.5044
23.455	25.1009	30.3062	18.2468
14.7873	25.6111	31.297	20.0386
23.5585	26.881	25.2206	14.9988
28.7803	19.9715	27.9815	23.3288
25.4665	28.4839	16.7981	9.54265
22.4792	32.1512	26.042	22.499
30.3031	13.9909	24.0248	15.4025
21.891	23.7887	25.7039	9.79825
22.4452	20.714	13.2281	13.7646
19.5063	28.362	30.5152	20.6933
14.7348	15.2127	15.8212	21.5183
31.727	22.6062	16.4251	15.5343
15.8657	24.7914	21.8695	34.6368
27.5748	37.5688	18.907	24.7529
24.206	17.6335	16.3948	18.3248
22.7872	21.1498	29.3663	18.4132
29.3024	36.156	36.7086	21.8527
18.5723	26.2638	27.7338	23.806
17.28	29.5823	29.2499	22.9385
21.3852	22.522	26.816	13.8154
23.8548	30.0611	38.4828	26.811
21.1329	19.2186	26.2399	18.5219
29.8385	20.9673	28.6272	29.8993
15.9468	29.7021	29.2672	28.7579
26.188	28.2018	36.2097	13.9299
20.2091	20.9236	33.4794	30.1174
28.1465	34.3406	23.5779	15.2473
21.9047	29.7892	17.4034	11.8173
11.2149	19.6445	21.319	27.429
26.6441	29.1765	24.9275	25.753
19.2265	20.5044	33.3269	27.1371
26.0249	20.6833	25.5859	19.461
23.342	29.4706	29.4932	30.7457
22.9561	34.4052	27.2027	19.2988
32.9811	28.2369	16.7491	17.3158
22.6094	31.9242	44.8853	19.7859
16.6829	27.4107	19.2548	25.9682
28.9047	32.5901	13.0374	13.4424
19.0166	22.5714	33.1005	19.3914
25.6258	25.3113	12.8142	31.058
22.0422	22.216	15.4541	15.8722
15.7558	21.5427	38.6723	18.2988
33.8828	23.1511	25.3607	28.4527
24.6219	15.3401	22.2946	19.8793
17.9361	26.9394	27.7517	21.0349
30.0388	26.5872	21.2646	19.2574
18.7444	28.1478	36.8084	14.5577
37.7586	22.8256	29.9052	17.4539
28.5336	39.0156	27.7531	22.5731
22.7811	21.9757	21.1418	33.4864
23.6963	29.0631	24.0378	29.8207
23.7995	28.9348	26.2784	20.3356
10.6318	23.2791	21.233	27.0024
20.2377	35.6765	55.1198	26.6164
15.9456	17.4358	17.2643	15.2417
17.1957	47.5787	32.9559	21.6881
31.982	35.0747	26.1895	29.0841
20.7704	29.876	23.6014	34.7
20.8347	24.7734	37.1781	22.4203
31.3946	26.2317	14.1623	12.8423
25.2226	47.0131	27.158	27.3532
30.8439	28.2134	19.6555	23.4177
25.0127	26.6481	25.3953	31.7532
23.7048	36.0994	30.3416	29.0618
32.132	22.3979	14.8927	19.3071
16.3258	31.4409	19.0526	24.5586
24.0107	32.7314	23.9299	17.3718
31.0148	36.6359	17.7366	20.5358
21.3833	25.8749	26.1237	17.8418
24.0944	17.7009	31.1217	25.0137
29.17	23.2361	23.3951	15.3363
18.7453	27.8805	14.8808	29.7313
21.7745	29.7605	20.3283	27.0589
25.1154	28.4292	34.0223	13.8539
16.6457	30.6199	11.0024	23.2693
27.3488	19.6778	18.0962	25.7958
24.6863	38.1211	16.2748	21.7121
29.0311	25.8478	25.6502	16.1528
19.92	33.5398	34.0235	21.5273
29.3902	35.8059	25.6609	18.9636
15.5588	14.28	22.9863	8.80915
14.9996	25.9226	26.9025	22.8034
26.1981	43.9493	33.1608	14.3707
15.0972	18.7732	17.1562	27.9603
21.4856	22.3368	15.2537	31.0097
24.4736	30.234	15.755	19.0768
26.8948	16.306	15.1869	13.7727
24.3334	14.833	17.9997	11.1348
13.1116	21.3162	22.2539	15.9952
37.0393	22.6302	11.404	15.87
15.6442	30.2594	18.0269	10.8139
11.9777	18.8006	16.6285	9.3585
29.7383	17.2264	26.8416	14.8144
18.7386	18.4366	15.9857	9.10556
15.5277	13.7125	29.3299	30.0657
16.5874	21.3144	23.2609	18.4404
14.6708	26.2041	29.6436	14.4788
21.4195	13.1996	34.5814	12.0039
8.87922	19.8319	9.98484	14.5056
21.099	30.8136	12.8542	20.4808
26.437	19.0927	32.4421	28.3715
20.0562	32.3744	36.6811	32.7845
19.6889	22.9833	25.207	25.7284
23.2897	19.1166	31.817	20.3746
20.998	12.6635	40.2681	22.486
15.116	28.4727	29.2773	12.2112
12.8875	16.5075	29.2809	30.1703
18.6791	15.6611	35.5089	30.0306
17.0635	13.8194	19.8589	26.6802
17.9881	31.2563	33.1108	22.0117
12.9829	27.1482	27.0277	35.462
18.8796	25.568	35.8787	19.5404
30.999	31.5367	26.5318	22.9576
24.7161	28.5822	28.7154	26.2466
12.8078	19.781	28.1368	18.2654
20.8305	14.4715	24.9454	32.776
16.4208	30.0423	18.9669	42.9468
10.4315	28.0227	23.6618	22.4591
23.8064	24.2911	30.1179	21.9066
13.7353	26.8216	29.8125	27.1229
14.7715	22.4078	19.2365	19.1035
10.8475	24.5741	29.091	35.0151
24.8669	19.8895	23.6621	28.7533
12.1398	29.021	26.1721	19.8701
24.4509	17.8078	31.1641	17.2406
11.5045	17.8273	41.1569	23.5783
14.4724	21.9623	31.8122	28.0913
15.1095	24.1953	27.1522	24.2029
9.2738	26.4028	27.91	35.9627
10.9965	19.5396	22.1684	24.3256
12.5145	27.5819	25.3624	31.122
16.1363	28.0046	33.2808	22.6476
12.7517	24.0663	16.59	29.145
17.3355	25.0673	24.4452	36.6195
16.575	27.7163	27.2633	23.5593
17.329	26.9035	30.0468	40.388
17.3318	31.0013	37.641	17.2073
22.9657	22.394	31.6551	18.5732
16.2331	29.49	26.7344	18.4949
9.36912	16.0627	17.8031	24.9131
9.40975	12.0412	24.1604	35.7649
15.8314	19.7244	27.4302	26.2104
15.579	31.2311	20.3006	34.3721
20.8499	27.0758	32.5549	20.8413
25.8502	22.5586	20.1646	25.159
32.6732	22.384	22.0347	26.7884
18.1694	35.7947	23.8691	30.376
31.654	15.0153	21.531	23.5072
32.743	32.7834	25.7048	19.6103
20.666	17.1153	15.8588	29.3919
20.3051	13.1018	25.5383	17.0507
21.4433	31.1961	29.9384	40.6741
16.9633	43.3046	27.8096	27.0109
18.6967	22.0601	34.4006	20.0383
20.9066	17.4504	19.3557	17.7359
1.70538	23.6844	28.3193	17.0011
26.4366	27.5821	22.3247	28.0251
26.2733	21.6807	29.4227	24.852
28.9114	24.0927	26.0585	20.5229
25.6395	18.209	25.5858	26.3849
18.0554	14.5384	18.3257	26.4123
21.5246	34.7968	17.4973	21.0484
29.7691	22.3199	14.1496	19.5623
18.8551	27.7799	30.456	12.7353
22.4296	20.3692	26.4895	23.9066
27.654	23.6456	12.4388	31.2494
18.8991	24.5407	14.2634	27.0621
16.687	29.9481	19.8777	17.4751
17.1302	22.9642	23.977	39.7325
22.9729	24.6003	28.0821	25.2219
26.476	26.107	12.4263	18.6846
18.9831	32.7947	19.7638	18.7292
38.5098	28.6576	15.7537	41.0428
19.5173	20.3064	18.703	22.0439
15.9513	22.2481	24.5854	34.227
24.0952	29.6196	13.3365	11.7082
20.3627	22.9829	20.11	30.4212
19.3609	27.5348	33.1123	17.0218
28.4219	22.3878	25.0757	19.3638
14.7472	17.3971	31.12	14.7601
10.0332	17.8483	22.3625	31.0597
22.8081	17.1369	37.1611	10.0021
24.2073	29.2325	28.2002	22.484
23.474	33.4303	21.6011	17.7867
19.7501	17.7939	20.4845	23.2479
17.9811	34.3457	19.3226	23.4143
17.6228	19.8689	33.3111	24.2793
26.6923	33.3017	30.5684	26.988
24.9886	20.8182	25.0098	21.0704
22.7573	15.6408	22.9587	13.0202
30.3074	20.0548	22.6982	17.6389
16.9572	42.96	26.2236	11.1818
18.6105	20.0362	18.6465	20.1452
14.5629	14.8105	27.9218	12.9311
16.2287	14.0094	30.5835	13.6962
18.1449	14.6965	23.1352	27.2801
20.5226	11.3194	17.0763	18.4655
20.0001	11.2204	16.2975	34.6719
26.701	17.154	9.07367	41.9598
19.6895	8.09913	18.7678	32.5706
20.826	13.1097	39.096	20.2243
13.9576	16.3306	15.8911	21.1737
25.8863	18.1206	28.9572	28.3865
32.1292	7.60418	15.9474	31.5913
17.4046	23.6827	23.3927	34.1413
8.36618	30.8513	32.8321	20.9096
13.2455	9.81214	29.5601	28.3568
13.3982	13.6085	14.607	30.8114
30.1883	8.0403	33.7434	28.4728
17.4535	13.0715	32.5083	21.207
22.7055	16.8302	23.017	32.1164
25.8388	15.5383	25.2251	14.5933
13.6636	8.72929	21.5115	21.9088
24.431	16.916	28.3641	23.2454
11.3938	18.9651	15.4416	21.5283
17.4315	14.4484	29.1617	24.6916
16.5444	13.8809	17.4921	24.4651
16.1872	13.7901	32.9823	34.48
29.7933	17.825	24.9876	20.8912
17.3833	10.2476	30.6158	48.8069
19.5927	34.2442	30.0656	23.9689
14.1149	22.2071	17.4359	28.8599
11.6513	18.5812	26.1828	29.5752
12.3163	20.6025	26.9124	24.4085
14.6087	26.6934	13.4446	38.1278
19.4359	20.5211	15.0306	21.3291
21.449	18.0006	17.9026	26.0531
14.1823	28.5943	27.3323	36.6106
10.9146	29.7608	23.1362	14.413
15.8107	25.508	19.669	32.7354
15.2918	17.8881	26.3021	44.4754
25.252	29.0659	21.2274	26.278
31.1501	17.5369	15.3401	32.1837
18.6669	34.2599	22.095	19.0825
21.4267	25.1546	17.5434	21.6609
18.2823	23.0347	13.8943	29.2269
31.3978	20.1287	28.9552	18.3319
26.4128	23.0399	26.2734	24.9795
22.6975	24.0356	14.0724	23.6529
18.4437	23.6982	12.4441	58.6919
17.4805	22.5953	10.4489	44.8883
24.3952	30.4572	16.4758	18.9384
16.5679	14.1254	25.2186	16.0049
21.0714	26.5465	13.6176	36.6009
30.5062	33.9045	14.7171	41.4071
21.9112	19.8958	14.1351	20.4424
12.9702	25.1409	11.1137	20.93
32.3683	16.8402	20.6595	27.6097
17.744	13.6204	15.2797	18.3799
28.9395	25.7517	28.0613	34.2731
21.2247	21.3447	12.7602	21.9335
21.1541	18.2274	10.8631	34.3039
28.5527	25.8415	17.1653	37.4739
24.5316	26.635	18.6897	28.4941
22.82	21.6915	27.2246	15.0612
21.6966	18.4531	9.6581	21.9498
28.5687	18.0502	9.91709	19.2568
36.7448	23.9898	13.5596	19.8711
25.9549	17.2405	13.3584	12.0112
21.4084	21.5116	7.20384	21.2741
24.664	21.7389	30.4352	12.4623
29.62	19.402	34.9279	16.8184
28.1994	26.1496	32.0601	22.9735
27.6741	19.0502	21.4027	30.0576
20.471	20.4129	25.2529	29.7434
20.7996	24.8783	16.4865	31.4863
13.8205	20.3711	18.4105	35.2882
25.2928	17.9147	17.9397	25.4213
20.9795	14.8229	20.5866	21.6378
23.8669	21.4633	34.9291	32.921
19.4954	20.7873	17.5002	17.9817
22.63	13.6746	18.2068	30.5654
18.0218	26.1478	23.544	19.9884
27.4301	27.2803	13.2972	17.7234
16.2261	15.9072	21.6588	20.3311
18.4408	26.1734	28.7692	17.7899
21.0133	21.5707	28.4072	26.3028
22.5323	18.7608	32.4057	32.571
29.7467	14.1182	28.3827	24.117
30.5666	16.0203	26.0832	18.1681
23.2521	21.0703	28.6051	28.492
22.6985	22.3933	15.8366	30.772
26.3809	27.8615	18.4677	30.3258
27.2799	24.3165	15.3802	23.065
22.4299	19.7885	33.9571	19.6325
24.6372	18.8568	35.124	25.7473
37.1628	17.3376	12.9358	31.1156
18.4745	17.7277	23.0715	30.5356
22.2537	20.4055	19.7745	22.3634
17.8209	18.0688	28.7891	24.1112
30.5107	29.3149	20.6788	19.4155
20.0116	20.0606	23.7361	31.3473
18.1013	20.9327	33.5768	25.3828
23.2488	12.9649	25.4164	13.9558
30.614	32.3005	10.8136	18.3435
28.679	13.4797	17.4847	33.2614
28.9679	26.6446	28.6207	21.2549
18.3375	35.2616	20.3987	23.7748
35.101	29.3307	24.2555	24.1252
31.9982	14.0643	23.7693	16.6528
21.8891	18.326	24.5575	28.2489
13.7857	31.0745	33.1112	27.1354
33.4911	13.056	16.2546	27.9213
30.2698	13.0767	25.1097	25.7102
22.8207	18.9142	22.4127	40.9779
29.4054	13.1688	16.0551	31.1295
25.1036	17.6515	24.9764	30.9034
22.2523	18.5878	24.7667	22.6125
34.7009	28.8232	21.0732	24.7663
18.039	11.466	29.7217	25.9705
22.0448	17.1639	16.6621	23.135
29.3082	13.1244	44.2707	26.837
25.0831	15.7964	17.8582	26.2345
39.8086	14.4367	8.94151	22.7504
24.7815	9.56567	32.362	35.2988
18.6213	14.0906	21.628	31.9612
21.4236	24.1398	19.3699	30.6939
16.5532	10.3604	31.0996	34.492
15.649	15.4407	25.3222	35.3206
31.7338	25.6348	28.4525	16.311
14.7063	14.3183	16.1404	22.1006
16.0317	11.7576	20.9268	24.8809
18.1282	28.9249	15.1907	18.7714
11.9152	12.0905	10.4443	26.0425
13.5206	14.8553	29.3314	10.9568
16.4857	16.6665	16.1336	26.8179
13.0713	14.3687	25.7101	15.4587
18.9885	16.2538	13.1685	10.1405
9.41991	16.5785	17.0266	32.3295
24.7342	9.6762	12.8292	20.3052
28.9284	15.3053	19.8837	22.6336
17.8163	11.5899	17.1792	18.3221
17.4108	10.5771	15.3242	19.5263
28.732	23.4661	11.7487	15.7192
25.2604	9.65485	22.4887	26.7774
12.4885	20.2737	16.9808	28.9387
34.1637	16.8179	19.7066	12.0057
30.5433	19.93	12.7465	18.0064
32.5787	34.606	14.0658	9.21364
19.2322	22.8909	12.8711	10.2728
16.7358	14.0634	10.0414	13.7215
10.6565	25.3428	24.9266	11.9754
17.7101	27.4046	23.8139	7.92503
17.4353	17.7756	18.4261	12.2148
22.9868	15.6211	17.7095	18.0356
14.5151	21.9119	17.1744	29.294
11.3551	33.2111	16.6644	27.3807
15.2657	22.5477	32.0337	24.0376
11.9954	28.5911	19.0902	18.4036
20.3501	28.4544	39.7758	10.2051
22.7185	25.9476	24.1571	10.731
17.1096	25.7	39.9961	14.5486
30.0709	25.6332	43.1462	17.3579
15.7963	36.6927	21.9366	9.17606
12.2673	13.5694	21.3304	16.1809
29.4775	25.9738	27.3333	20.7851
18.3685	22.9225	21.7224	10.1622
21.5945	25.8553	32.6987	13.8403
11.3156	17.899	23.471	12.1828
11.553	21.7351	31.1367	18.0509
12.7041	27.7827	39.2085	16.0764
10.806	23.7552	25.3671	17.9935
11.5114	29.0939	26.977	18.8661
10.2087	21.3567	41.7126	13.8622
15.1568	15.9945	33.4909	12.9715
12.4202	30.2317	19.7014	35.6782
8.97232	14.5384	19.5092	19.0855
11.2183	21.263	22.5182	32.4885
28.9217	18.0878	19.8864	38.0241
25.1215	32.992	32.1688	26.9349
19.1477	23.823	44.0014	20.882
31.7178	25.7821	31.06	17.7785
27.6421	33.6202	21.7867	18.7612
20.7546	29.2203	25.3283	21.0788
18.1089	22.7834	20.3726	26.7348
15.601	33.2635	32.2688	26.1765
20.4517	10.1997	31.7979	18.86
24.0603	28.4304	42.3778	15.9428
34.7911	26.8345	21.0168	32.6802
30.6358	24.764	22.3458	24.5223
34.7458	28.9682	42.9201	17.4572
24.8566	37.7904	23.4816	31.3155
21.427	23.8447	24.0508	27.1786
27.9872	23.0769	23.3871	26.0469
29.7536	14.2139	25.787	13.8612
27.74	22.3738	31.5854	21.0227
23.9049	20.4732	20.8142	13.1758
30.6997	13.6427	20.8192	32.3705
25.0037	17.946	26.753	25.5777
29.1324	34.721	25.5882	27.8096
12.5114	36.2227	11.7335	19.8173
16.9476	21.0198	27.9869	28.1227
29.2021	19.3198	25.0352	25.0453
19.8803	42.1285	19.4611	34.5633
15.1315	25.6396	44.1714	17.6
25.7691	23.9425	26.0345	23.7744
30.9244	29.7153	26.6953	25.7294
15.5173	23.2645	17.1298	28.2476
26.3137	20.1553	19.7706	17.0564
22.4051	18.0707	24.1407	18.7678
17.539	15.4487	23.512	18.8588
20.9475	22.3642	22.487	36.993
22.7441	31.3536	14.2951	21.7571
24.5327	30.8839	16.0634	28.337
28.2295	25.2649	20.0596	22.9747
18.1065	25.9261	20.149	25.2925
32.1649	12.1769	11.6687	16.7553
17.8567	20.3603	17.4102	24.8722
17.8723	22.5124	17.3183	29.683
16.4569	21.6326	17.863	21.0417
31.8938	23.3417	21.6491	17.264
30.8705	15.7438	20.7888	26.2538
30.4465	32.5593	20.0154	26.1163
22.4451	10.8244	30.9334	29.2975
28.496	17.0225	20.5675	25.3716
18.1876	35.6895	13.0605	27.6216
17.7067	11.6403	17.2176	20.7665
22.4872	15.393	10.2681	18.4944
18.91	17.9394	8.43774	36.251
27.1887	32.2654	22.6573	25.0539
13.9434	24.1177	20.0294	22.6453
30.0719	30.9925	10.2449	25.3823
24.5842	22.1547	15.3201	35.6778
32.4291	28.6971	28.4156	17.2918
29.08	14.7887	16.2582	17.0226
13.1743	14.0183	16.0725	29.7167
16.6236	14.1086	22.5441	18.6863
22.667	18.7849	22.0379	25.3625
25.6139	8.87291	13.4468	14.4948
33.5573	23.8321	27.1367	18.45
22.3622	16.3455	30.7007	32.6006
27.1063	17.6016	17.0219	47.0916
12.4236	22.199	22.1724	36.3414
20.5239	13.4727	31.1383	25.4099
23.725	14.9351	18.854	11.516
21.9284	17.9139	20.6009	20.7574
29.3983	19.4972	15.0487	27.7628
14.8267	12.3947	18.515	18.3898
20.8084	14.386	13.2873	16.6176
26.021	22.412	30.8225	18.5973
28.8936	15.8856	18.0162	17.8004
27.0106	21.703	30.9662	13.5864
26.7346	28.9575	35.3152	21.5445
25.0893	18.9409	24.1731	15.2523
24.9794	12.7029	22.1209	21.3754
29.1448	26.0661	24.5153	22.4109
14.1441	18.2096	21.9494	17.4544
31.3521	16.6586	27.6017	8.08879
17.7035	14.8947	30.4624	41.0686
27.6349	13.5882	21.5958	28.3771
24.2469	10.7944	21.5611	27.364
24.8281	9.32418	26.488	40.3263
22.3465	17.2735	21.8911	29.6676
30.2755	18.0616	17.0974	20.2314
20.4938	18.609	16.3826	35.3315
32.0792	8.53867	23.7805	21.0658
17.6733	29.918	20.8355	18.756
22.2005	26.4291	16.1226	32.9894
24.3606	33.7795	29.2962	18.7406
24.5098	33.1806	27.9815	22.0711
30.1554	17.4271	19.0061	21.4969
16.983	31.8662	11.3538	31.1405
14.3469	19.2086	30.4923	21.4792
15.856	26.5091	17.7891	25.0299
35.0617	26.7486	21.6063	25.0841
32.8443	15.736	12.6867	25.0466
25.1909	23.9221	35.3646	31.2538
12.2321	23.7123	20.8529	26.3227
15.7441	18.5706	22.59	21.1533
17.8239	25.0459	18.6177	21.9995
14.9237	22.5831	25.5353	35.8594
29.9727	20.7567	32.3141	29.5847
12.0627	32.8824	29.5754	22.2607
29.9435	25.167	18.1444	24.6735
15.4089	25.4011	27.6109	27.6871
12.6546	40.8702	19.1165	22.2569
18.2367	22.9104	28.3828	19.5428
29.1632	25.1055	25.5307	28.7895
16.0492	16.0389	14.8615	31.9784
20.6024	32.4158	20.3114	16.8349
21.4141	19.4645	9.46105	17.3338
13.5455	26.139	17.4486	15.2641
21.2602	25.5886	18.2196	27.878
32.5319	16.9847	23.3618	38.5772
13.779	16.0545	20.2674	26.5684
38.0464	20.2442	14.7506	32.7295
21.6607	30.0868	22.2267	29.4334
26.2135	23.3272	13.6146	23.6282
43.0621	38.9491	18.6699	21.9851
26.2239	20.8862	14.6381	26.9788
18.0958	21.1107	23.3208	24.1993
15.5229	24.6854	15.3805	32.8177
13.3437	30.1642	27.6227	36.8905
22.1152	24.8172	12.6809	20.6644
12.173	29.6684	17.5862	20.6283
16.8351	16.0572	22.2994	18.1654
31.2057	31.5624	15.318	22.6613
11.3726	25.6761	7.61426	26.542
17.2351	27.4206	13.9301	11.4363
19.3514	25.1292	18.2331	19.3814
10.5699	23.027	28.1211	35.9879
18.5192	21.8307	15.9234	16.1342
35.0959	13.6747	27.9423	26.8125
26.1724	28.3056	14.927	21.1998
9.28547	24.9521	24.1908	23.6618
14.245	17.0039	28.253	21.8854
6.82657	31.3119	28.4449	25.583
17.4234	25.6795	17.5235	17.0878
15.6586	35.7259	25.828	32.2634
9.07439	24.3333	25.4699	37.6331
9.9581	23.5503	17.9197	30.0055
15.1553	15.5852	20.4575	24.9935
19.2189	34.9666	21.9587	21.6445
36.2012	13.4391	24.8542	28.1365
15.2318	17.0301	18.209	22.777
27.2773	23.9603	24.5091	28.8601
23.2237	24.1713	29.0138	26.1363
25.194	22.1715	19.1394	29.6466
31.9359	28.3662	14.829	9.21258
32.36	19.7806	17.7897	22.0178
29.0929	17.2107	19.3452	21.5989
24.0642	16.5099	17.3758	16.0821
31.6211	14.8955	21.0824	26.2022
38.9371	23.5185	17.5041	29.5056
16.1791	22.2592	20.723	22.53
30.9015	16.0645	15.1991	23.6489
18.3588	24.6215	30.7857	29.6175
21.7748	8.3394	16.6138	19.6377
13.7462	12.8271	20.6659	27.9615
38.8372	24.9527	27.8277	18.4668
29.2718	16.0798	17.6315	23.9437
22.5651	16.306	6.64643	27.2054
22.4306	28.7563	14.2575	37.1801
11.9402	20.5043	24.3858	17.3954
21.8245	29.8804	24.6044	30.8906
19.7033	27.4302	14.7832	27.6262
22.4855	15.9126	21.0879	18.5535
25.4387	23.124	20.9914	16.9909
19.6616	23.6561	19.6181	21.4332
31.0554	14.0531	24.712	25.7306
19.8053	18.4611	32.4722	24.1892
22.221	11.3558	17.072	11.245
18.8988	7.80947	17.6216	18.7393
20.9911	30.3627	25.619	28.3558
32.569	12.4927	15.9496	21.7225
28.223	23.2684	20.7571	11.6677
36.2331	13.8621	18.7507	14.8004
20.8015	20.1506	19.4969	16.6087
26.1147	19.5395	13.291	12.3131
17.0174	25.4679	14.7156	15.7508
23.2279	31.1764	18.8624	18.5271
17.4202	21.7571	17.476	22.3659
25.2616	25.3731	17.0529	25.6202
35.7167	25.618	20.7415	23.922
18.3866	22.1822	8.43425	18.2412
23.5078	19.4519	14.5557	17.5317
33.3036	19.9853	25.0078	32.1978
45.7242	46.232	30.4573	21.2245
26.4593	21.7094	12.0535	24.391
19.6455	21.6902	12.1383	27.6783
18.6532	20.8892	20.7154	36.7487
18.9467	24.5454	19.2979	19.6164
15.2618	22.1209	18.5839	24.4459
44.3443	17.907	13.2408	37.3584
23.296	19.9269	13.753	25.2196
22.2494	21.0068	14.5051	15.6662
22.0605	17.213		23.9085
23.4989	20.1435		24.6264
21.191	23.1214		24.2557
23.4841	23.5321		26.7002
23.6017	17.6022		21.9148
23.5085	17.9438		25.9078
26.9125	26.2426		17.5166
22.4771	20.2451		23.696
16.903	19.8892		21.5725
39.979	17.8107		27.121
28.2866	22.4625		15.6877
34.8797	17.987		25.6335
28.2666	14.674		23.74
13.9605	18.9812		31.0967
28.5136	27.526		14.4259
29.9142	26.278		24.3343
25.0548	28.0909		17.7809
19.53	20.928		23.5278
13.8166	31.1875		20.5818
17.1187	27.2774		25.4112
27.8617	31.2673		34.1059
29.469	33.4659		26.8844
15.1575	29.3383		31.4634
15.0083	27.933		23.5615
25.2925	23.4372		30.9364
14.4883	23.3967		30.632
12.6371	35.0276		18.0509
16.7989	25.4097		41.7693
27.5697	24.4822		35.551
22.4064	18.1644		22.326
10.261	19.9507		27.0846
7.96646	27.5357		25.5267
14.8038	34.2357		22.2587
2.61228	21.3301		26.3817
19.5746	17.634		28.1255
30.3527	28.3949		27.3549
25.2405	25.35		19.564
16.1265	30.0956		17.4007
13.5119	14.9126		19.5704
19.9619	24.4224		23.3354
7.09492	26.1282		24.8425
24.2582	23.874		34.3485
15.0413	12.4011		14.334
22.8998	19.4437		25.9975
10.3495	25.1829		25.2767
33.4848	25.0699		22.6218
7.37114	24.1502		20.1124
21.5031	12.4563		41.1529
28.5886	18.7044		33.4297
18.3472	18.8955		13.8176
19.6634	20.4215		19.3482
15.7616	24.86		18.6194
21.1127	12.6526		22.5871
18.7758	11.9584		30.0798
17.1108	19.3383		18.8738
22.8227	22.4629		16.0385
24.6493	34.5702		23.0083
20.8736	15.4453		30.6378
25.2188	16.0981		15.4818
20.2809	30.7451		36.9463
21.7419	29.8786		11.1932
29.1027	32.1584		15.516
28.4256	19.1714		21.7245
19.4733	12.9847		29.6237
21.0816	21.0791		17.3906
27.0473	29.5721		17.642
23.0962	26.1911		16.5079
26.603	16.6449		14.9046
18.2991	12.9961		14.5577
15.8412	13.2731		33.4442
15.5164	11.8428		34.2915
26.5574	18.8713		17.95
28.969	17.7455		18.5164
17.7308	13.2472		10.3799
22.9996	15.6855		8.82386
16.9466	14.2375		17.8091
18.4449	16.8095		16.2702
26.1513			19.5111
22.0785			30.8528
29.3291			24.2035
37.3279			15.9412
23.7881			30.8309
20.0884			17.2768
28.6276			27.6338
31.4876			32.326
22.3033			16.0153
23.0711			23.6619
14.536			38.4244
29.2438			26.5095
26.3456			36.2351
16.5853			30.0824
21.8274			36.3443
29.5533			37.4758
21.8047			17.3949
31.2039			24.1414
21.3713			35.955
34.5736			38.1292
26.8639			20.985
13.8576			23.7555
29.3663			25.7215
27.9977			32.4811
27.6445			29.166
24.0315			27.6094
21.2585			22.3667
35.0711			23.1131
25.8625			27.6514
23.8662			25.7414
26.8974			33.7768
24.8648			30.807
18.4893			24.537
11.6573			37.0843
12.5519			28.1831
24.9317			33.2319
12.465			16.9828
11.0366			27.6433
18.0467			23.1504
29.9362			18.7569
22.0493			17.352
26.0225			35.8869
28.9938			22.5791
19.1194			23.8007
21.5809			32.476
18.4725			21.6638
12.8997			16.7102
22.4628			17.9344
26.7115			30.8886
19.2598			15.4099
21.9643			26.425
15.6162			15.9911
12.231			27.5784
14.6844			35.5718
16.6511			21.5672
15.3156			14.3843
15.5257			20.2885
19.3867			22.184
15.0405			23.9045
21.1563			34.4611
20.6675			22.7075
17.3451			18.1625
18.8516			28.6261
21.6124			23.1591
27.1274			24.1257
35.1796			40.6699
10.7292			32.5137
17.8056			9.21911
14.6606			19.1034
22.5628			30.109
21.0329			42.782
22.114			31.7857
9.19548			28.0588
27.8085			43.5632
14.1629			34.8338
21.43			23.9522
17.6859			29.7384
9.00221			35.4008
8.61962			32.3057
8.45818			26.1174
32.2382			26.2724
13.9377			44.9007
11.8807			26.989
8.20471			22.1275
15.7787			37.092
11.5257			36.0405
13.5196			17.3769
19.9749			36.1901
23.4745			32.1009
29.6888			28.0336
19.8398			24.9616
16.9943			32.4249
15.2145			25.7033
24.2454			25.8423
22.9557			34.2331
25.5868			40.7573
13.0151			24.6767
22.4624			30.3933
30.2389			34.3935
26.2718			40.6404
23.5044			22.7865
27.6327			12.7343
20.6164			28.9374
22.1764			18.8986
22.6776			15.7016
19.1209			16.8119
15.8061			38.3642
24.2897			42.1782
22.2989			32.6743
25.9927			26.0272
11.0065			27.9294
27.9406			22.3609
31.222			24.3714
20.6864			25.6748
24.3428			24.0538
34.0244			27.3621
21.499			32.4386
35.5346			28.0871
34.9769			25.748
23.2092			21.7875
20.6755			15.8546
33.9623			26.9456
32.376			32.1102
20.4444			20.0089
22.7458			21.1181
22.0734			30.1623
24.012			18.6862
18.0547			46.0565
21.6175			25.9245
24.2534			21.1831
23.0311			27.1166
29.1274			20.5736
26.0665			16.9366
19.8638			15.9968
19.1562			16.4807
23.2278			18.2779
24.121			12.1283
22.9101			15.984
31.9246			12.1747
28.1328			12.2099
33.1653			17.4921
23.6808			15.8692
17.1606			22.5425
35.0328			15.9926
34.9674			23.432
9.42103			19.087
29.5873			21.8741
34.9641			24.1606
31.1357			8.30186
29.0582			9.04331
20.3319			8.51802
16.4939			11.0415
24.4648			10.2744
30.1459			9.05603
16.7386			16.4544
15.1857			12.4452
53.2662			19.0625
21.0135			12.6096
24.1757			22.4728
18.065			26.5689
35.0606			38.92
21.9187			20.5482
22.5747			29.8247
26.06			28.4145
20.4126			32.9276
23.6275			29.8909
32.9392			41.821
27.843			29.2354
28.7037			23.2843
20.8258			24.1434
34.513			22.3606
24.2892			29.548
28.3705			29.4451
26.3377			38.8065
6.88325			26.9302
36.4417			28.3348
18.4295			33.9636
27.7058			31.0843
20.1738			23.3733
21.483			20.9657
35.7765			21.5936
43.0356			30.439
16.851			19.6807
14.7596			30.8618
11.9734			28.7581
13.489			26.8084
25.1165			17.6935
14.2023			26.2458
15.1236			39.5163
15.1905			25.0058
29.3963			37.7416
26.1435			21.456
19.6444			26.585
10.7969			25.5471
17.4851			31.5438
16.0793			27.5573
11.7875			33.8163
18.5014			15.5349
31.9904			23.0244
23.3401			24.9205
12.7229			16.6135
24.0825			23.98
20.6851			22.7149
15.7476			24.9467
15.0443			30.3312
19.4095			37.1425
14.6812			25.3382
11.4934			34.8167
22.5798			34.5201
21.2628			26.1547
7.23894			18.1797
18.6187			15.2809
20.9042			12.5874
13.2653			25.8097
33.4948			31.2572
6.27084			20.6814
15.9631			32.6532
12.0439			19.722
22.2023			19.3129
10.0505			29.6749
11.0051			27.6868
8.56581			39.0013
15.9868			21.7961
14.8351			23.9014
11.0178			40.0314
13.7631			29.575
14.2188			23.8523
13.0331			31.0458
26.3471			17.2435
15.5467			17.7368
27.8155			33.2311
8.5995			20.4498
30.6502			32.9129
20.6352			25.0472
26.6257			24.2642
			20.296
			32.1712
			27.9126
			11.2874
			27.155
			32.2856
			29.966
			29.7218
			29.7758
			29.3702
			30.4086
			28.9965
			28.3688
			30.0344
			26.5573
			20.8592
			23.6253
			23.0531
			26.4102
			38.9883
			34.6055
			30.3945
			12.1776
			34.3773
			30.5268
			20.0232
			31.4395
			21.3608
			23.4594
			29.6226
			13.9864
			43.2555
			18.5662
			25.8435
			25.2719
			16.588
			18.2403
			36.6943
			36.4412
			16.2074
			20.2982
			15.5147
			9.19619
			20.4519
			23.5709
			31.7009
			18.9955
			15.2584
			20.9286
			16.9088
			15.696
			16.4946
			16.382
			20.0158
			16.6139
			25.2663
			28.6447
			31.8333
			17.5148
			18.7998
			27.6876
			31.9514
			18.2644
			11.1606
			15.2405
			34.8053
			14.5968
			13.7922
			20.5491
			35.4743
			37.9751
			32.428
			29.371
			17.1733
			31.8534
			23.8377
			18.0866
			12.9704
			37.2117
			17.79
			33.9446
			29.0359
			27.3111
			18.7973
			15.0824
			26.8027
			15.7599
			23.4206
			34.8697
			38.8886
			25.5779
			12.2573
			31.8654
			31.6441
			24.8941
			21.0914
			25.117
			32.6864
			23.3261
			34.9031
			22.1209
			16.8031
			17.551
			20.54
			20.4004
			15.4648
			18.8395
			32.8178
			18.218
			27.5191
			22.5674
			22.2925
			22.6934
			37.4696
			20.8074
			13.3151
			14.6762
			15.9507
			19.7159
			20.3693
			22.285
			28.0367
			17.2941
			32.1279
			13.4064
			24.0492
			24.4621
			21.4455
			12.1352
			19.4585
			8.8914
			22.8259
22.2534	22.9278	23.5654	24.214

## Sheet: Fig10_sup1F
Cell surface area: MorphoGraphX individual plants
C_N: Col-0; Normal light
H_N: hec1,2,3; Normal light
C_L: Col-0; Low light
H_L: hec1,2,3; Low light
C_N_#2	C_N_#4	C_N_#5	C_N_#6	C_N_#7	C_N_#8	C_N_#11	C_N_#12	C_N_#13	H_N_#3	H_N_#5	H_N_#6	H_N_#7	H_N_#11	H_N_#12	H_N_#13	H_N_#14	C_L_#1	C_L_#2	C_L_#3	C_L_#4	C_L_#7	C_L_#8	C_L_#9	C_L_#13	C_L_#16	H_L_#2	H_L_#3	H_L_#5	H_L_#6	H_L_#7	H_L_#8	H_L_#11	H_L_#12	H_L_#14	H_L_#15	H_L_#16
18.5562	30.3609	20.8679	15.8314	21.0714	19.1477	19.2189	21.5031	24.2454	18.5974	31.3694	30.8094	27.1482	34.2442	16.8179	29.918	20.1506	27.7775	23.2733	19.4478	29.6436	33.1123	30.4352	16.6644	16.0725	28.253	25.6591	24.7668	34.6368	28.3715	34.6719	12.9715	41.0686	18.2412	30.8528	26.5689	37.2117
18.8286	29.8779	34.949	15.579	30.5062	31.7178	36.2012	28.5886	22.9557	23.7294	23.1861	28.793	25.568	22.2071	19.93	26.4291	19.5395	39.2607	28.6914	10.7375	34.5814	25.0757	34.9279	32.0337	22.5441	28.4449	29.7162	20.6739	24.7529	32.7845	41.9598	35.6782	28.3771	17.5317	24.2035	38.92	17.79
21.2763	19.4636	25.0387	20.8499	21.9112	27.6421	15.2318	18.3472	25.5868	26.3079	25.7907	36.513	31.5367	18.5812	34.606	33.7795	25.4679	25.761	33.4374	45.5464	9.98484	31.12	32.0601	19.0902	22.0379	17.5235	6.23201	17.1893	18.3248	25.7284	32.5706	19.0855	27.364	32.1978	15.9412	20.5482	33.9446
29.4703	22.9428	28.5208	25.8502	12.9702	20.7546	27.2773	19.6634	13.0151	24.4226	31.5973	20.6803	28.5822	20.6025	22.8909	33.1806	31.1764	17.7894	31.8742	32.1305	12.8542	22.3625	21.4027	39.7758	13.4468	25.828	19.0002	20.5971	18.4132	20.3746	20.2243	32.4885	40.3263	21.2245	30.8309	29.8247	29.0359
29.5158	24.5658	25.0822	32.6732	32.3683	18.1089	23.2237	15.7616	22.4624	27.2315	36.786	28.4815	19.781	26.6934	14.0634	17.4271	21.7571	23.2102	16.8446	27.115	32.4421	37.1611	25.2529	24.1571	27.1367	25.4699	22.9289	20.3912	21.8527	22.486	21.1737	38.0241	29.6676	24.391	17.2768	28.4145	27.3111
26.7691	6.68435	25.024	18.1694	17.744	15.601	25.194	21.1127	30.2389	30.1684	36.1287	29.6607	14.4715	20.5211	25.3428	31.8662	25.3731	25.0326	12.9102	26.6107	36.6811	28.2002	16.4865	39.9961	30.7007	17.9197	32.5213	38.0738	23.806	12.2112	28.3865	26.9349	20.2314	27.6783	27.6338	32.9276	18.7973
34.3262	18.3646	22.1384	31.654	28.9395	20.4517	31.9359	18.7758	26.2718	17.4391	23.1167	25.6296	30.0423	18.0006	27.4046	19.2086	25.618	17.4356	15.1483	13.378	25.207	21.6011	18.4105	43.1462	17.0219	20.4575	19.9241	28.4286	22.9385	30.1703	31.5913	20.882	35.3315	36.7487	32.326	29.8909	15.0824
32.1786	26.2667	29.2913	32.743	21.2247	24.0603	32.36	17.1108	23.5044	26.5613	25.1789	27.5149	28.0227	28.5943	17.7756	26.5091	22.1822	17.0182	23.7359	22.2226	31.817	20.4845	17.9397	21.9366	22.1724	21.9587	18.3079	33.3773	13.8154	30.0306	34.1413	17.7785	21.0658	19.6164	16.0153	41.821	26.8027
21.0781	18.4229	24.1749	20.666	21.1541	34.7911	29.0929	22.8227	27.6327	22.4216	22.3287	27.8682	24.2911	29.7608	15.6211	26.7486	19.4519	23.2669	30.7076	12.4817	40.2681	19.3226	20.5866	21.3304	31.1383	24.8542	34.3895	30.2121	26.811	26.6802	20.9096	18.7612	18.756	24.4459	23.6619	29.2354	15.7599
23.4909	14.8072	26.5477	20.3051	28.5527	30.6358	24.0642	24.6493	20.6164	19.0398	34.6048	18.1874	26.8216	25.508	21.9119	15.736	19.9853	18.9712	24.7765	36.5612	29.2773	33.3111	34.9291	27.3333	18.854	18.209	14.0304	35.5595	18.5219	22.0117	28.3568	21.0788	32.9894	37.3584	38.4244	23.2843	23.4206
12.1673	27.2334	31.0884	21.4433	24.5316	34.7458	31.6211	20.8736	22.1764	32.6474	26.9295	21.4914	22.4078	17.8881	33.2111	23.9221	46.232	39.2618	16.2426	34.3558	29.2809	30.5684	17.5002	21.7224	20.6009	24.5091	29.4916	32.1045	29.8993	35.462	30.8114	26.7348	18.7406	25.2196	26.5095	24.1434	34.8697
25.0457	28.4442	23.455	16.9633	22.82	24.8566	38.9371	25.2188	22.6776	44.0008	32.6646	17.1472	24.5741	29.0659	22.5477	23.7123	21.7094	27.5711	18.3926	27.3898	35.5089	25.0098	18.2068	32.6987	15.0487	29.0138	35.4931	19.1926	28.7579	19.5404	28.4728	26.1765	22.0711	15.6662	36.2351	22.3606	38.8886
42.6373	17.375	14.7873	18.6967	21.6966	21.427	16.1791	20.2809	19.1209	26.5185	17.5859	28.0411	19.8895	17.5369	28.5911	18.5706	21.6902	20.3245	22.6352	16.9102	19.8589	22.9587	23.544	23.471	18.515	19.1394	19.9191	31.1916	13.9299	22.9576	21.207	18.86	21.4969	23.9085	30.0824	29.548	25.5779
36.2414	27.8994	23.5585	20.9066	28.5687	27.9872	30.9015	21.7419	15.8061	7.45298	23.5187	23.9551	29.021	34.2599	28.4544	25.0459	20.8892	23.6779	23.2388	20.3173	33.1108	22.6982	13.2972	31.1367	13.2873	14.829	21.9837	35.0407	30.1174	26.2466	32.1164	15.9428	31.1405	24.6264	36.3443	29.4451	12.2573
17.5152	32.0799	28.7803	1.70538	36.7448	29.7536	18.3588	29.1027	24.2897	24.3508	35.978	21.3681	17.8078	25.1546	25.9476	22.5831	24.5454	24.6036	22.0728	28.662	27.0277	26.2236	21.6588	39.2085	30.8225	17.7897	22.9465	33.7197	15.2473	18.2654	14.5933	32.6802	21.4792	24.2557	37.4758	38.8065	31.8654
16.3808	27.812	25.4665	26.4366	25.9549	27.74	21.7748	28.4256	22.2989	25.1976	29.2115	21.0426	17.8273	23.0347	25.7	20.7567	22.1209	30.9215	17.6507	21.8781	35.8787	18.6465	28.7692	25.3671	18.0162	19.3452	18.1436	32.0259	11.8173	32.776	21.9088	24.5223	25.0299	26.7002	17.3949	26.9302	31.6441
41.5342	26.066	22.4792	26.2733	21.4084	23.9049	13.7462	19.4733	25.9927	15.8185	18.3285	36.0221	21.9623	20.1287	25.6332	32.8824	17.907	23.2576	34.327	24.0747	26.5318	27.9218	28.4072	26.977	30.9662	17.3758	43.8086	23.4545	27.429	42.9468	23.2454	17.4572	25.0841	21.9148	24.1414	28.3348	24.8941
20.3422	25.7313	30.3031	28.9114	24.664	30.6997	38.8372	21.0816	11.0065	19.8619	27.5017	27.9781	24.1953	23.0399	36.6927	25.167	19.9269	24.6176	24.1724	23.8874	28.7154	30.5835	32.4057	41.7126	35.3152	21.0824	23.7592	26.5938	25.753	22.4591	21.5283	31.3155	25.0466	25.9078	35.955	33.9636	21.0914
14.3313	24.7515	21.891	25.6395	29.62	25.0037	29.2718	27.0473	27.9406	25.6353	32.1997	32.0043	26.4028	24.0356	13.5694	25.4011	21.0068	17.6032	19.7173	24.927	28.1368	23.1352	28.3827	33.4909	24.1731	17.5041	29.4558	20.5206	27.1371	21.9066	24.6916	27.1786	31.2538	17.5166	38.1292	31.0843	25.117
25.7234	23.7015	22.4452	18.0554	28.1994	29.1324	22.5651	23.0962	31.222	21.6912	32.1323	25.1009	19.5396	23.6982	25.9738	40.8702	17.213	27.2126	18.595	40.1188	24.9454	17.0763	26.0832	19.7014	22.1209	20.723	20.6688	13.2993	19.461	27.1229	24.4651	26.0469	26.3227	23.696	20.985	23.3733	32.6864
15.1869	31.1997	19.5063	21.5246	27.6741	12.5114	22.4306	26.603	20.6864	26.3904	19.1157	25.6111	27.5819	22.5953	22.9225	22.9104	20.1435	36.9053	43.5736	23.3144	18.9669	16.2975	28.6051	19.5092	24.5153	15.1991	25.9249	32.1986	30.7457	19.1035	34.48	13.8612	21.1533	21.5725	23.7555	20.9657	23.3261
31.6116	17.9753	14.7348	29.7691	20.471	16.9476	11.9402	18.2991	24.3428	27.1934	30.8103	26.881	28.0046	30.4572	25.8553	25.1055	23.1214	17.1175	30.4817	27.4546	23.6618	9.07367	15.8366	22.5182	21.9494	30.7857	17.3386	30.4784	19.2988	35.0151	20.8912	21.0227	21.9995	27.121	25.7215	21.5936	34.9031
20.344	23.1589	31.727	18.8551	20.7996	29.2021	21.8245	15.8412	34.0244	26.9187	27.7812	19.9715	24.0663	14.1254	17.899	16.0389	23.5321	16.0365	10.2104	31.135	30.1179	18.7678	18.4677	19.8864	27.6017	16.6138	12.9888	28.5666	17.3158	28.7533	48.8069	13.1758	35.8594	15.6877	32.4811	30.439	22.1209
27.4468	23.1379	15.8657	22.4296	13.8205	19.8803	19.7033	15.5164	21.499	27.3221	26.286	28.4839	25.0673	26.5465	21.7351	32.4158	17.6022	24.2252	18.2756	23.9051	29.8125	39.096	15.3802	32.1688	30.4624	20.6659	19.1128	20.7606	19.7859	19.8701	23.9689	32.3705	29.5847	25.6335	29.166	19.6807	16.8031
24.4221	26.3448	27.5748	27.654	25.2928	15.1315	22.4855	26.5574	35.5346	23.937	30.3868	32.1512	27.7163	33.9045	27.7827	19.4645	17.9438	20.8574	28.3848	42.1434	19.2365	15.8911	33.9571	44.0014	21.5958	27.8277	26.0614	21.1898	25.9682	17.2406	28.8599	25.5777	22.2607	23.74	27.6094	30.8618	17.551
26.6785	39.6308	24.206	18.8991	20.9795	25.7691	25.4387	28.969	34.9769	20.6154	20.3701	13.9909	26.9035	19.8958	23.7552	26.139	26.2426	22.2697	21.6177	21.4703	29.091	28.9572	35.124	31.06	21.5611	17.6315	41.5632	20.9133	13.4424	23.5783	29.5752	27.8096	24.6735	31.0967	22.3667	28.7581	20.54
28.4731	27.4607	22.7872	16.687	23.8669	30.9244	19.6616	17.7308	23.2092	30.4635	33.6964	23.7887	31.0013	25.1409	29.0939	25.5886	20.2451	23.0974	27.8413	15.9884	23.6621	15.9474	12.9358	21.7867	26.488	6.64643	14.1922	32.9766	19.3914	28.0913	24.4085	19.8173	27.6871	14.4259	23.1131	26.8084	20.4004
33.9333	27.2875	29.3024	17.1302	19.4954	15.5173	31.0554	22.9996	20.6755	23.144	16.7152	20.714	22.394	16.8402	21.3567	16.9847	19.8892	28.1117	28.89	21.8999	26.1721	23.3927	23.0715	25.3283	21.8911	14.2575	27.2439	14.5301	31.058	24.2029	38.1278	28.1227	22.2569	24.3343	27.6514	17.6935	15.4648
30.0104	20.6993	18.5723	22.9729	22.63	26.3137	19.8053	16.9466	33.9623	27.9734	15.6337	28.362	29.49	13.6204	15.9945	16.0545	17.8107	18.634	15.0999	29.1009	31.1641	32.8321	19.7745	20.3726	17.0974	24.3858	33.5315	35.2663	15.8722	35.9627	21.3291	25.0453	19.5428	17.7809	25.7414	26.2458	18.8395
32.3099	13.2872	17.28	26.476	18.0218	22.4051	22.221	18.4449	32.376	25.8016	16.7055	15.2127	16.0627	25.7517	30.2317	20.2442	22.4625	35.5917	20.7475	26.9785	41.1569	29.5601	28.7891	32.2688	16.3826	24.6044	35.1032	27.4857	18.2988	24.3256	26.0531	34.5633	28.7895	23.5278	33.7768	39.5163	32.8178
25.0386	23.548	21.3852	18.9831	27.4301	17.539	18.8988	26.1513	20.4444	27.3209	20.9543	22.6062	12.0412	21.3447	14.5384	30.0868	17.987	12.2183	25.0572	27.732	31.8122	14.607	20.6788	31.7979	23.7805	14.7832	25.9809	33.4838	28.4527	31.122	36.6106	17.6	31.9784	20.5818	30.807	25.0058	18.218
19.5768	19.3313	23.8548	38.5098	16.2261	20.9475	20.9911	22.0785	22.7458	26.9918	21.8901	24.7914	19.7244	18.2274	21.263	23.3272	14.674	40.5522	31.2138	27.4029	27.1522	33.7434	23.7361	42.3778	20.8355	21.0879	25.8259	35.8005	19.8793	22.6476	14.413	23.7744	16.8349	25.4112	24.537	37.7416	27.5191
13.7266	24.1401	21.1329	19.5173	18.4408	22.7441	32.569	29.3291	22.0734	17.2745	27.9933	37.5688	31.2311	25.8415	18.0878	38.9491	18.9812	37.0456	37.6168	30.1603	27.91	32.5083	33.5768	21.0168	16.1226	20.9914	24.5521	30.5848	21.0349	29.145	32.7354	25.7294	17.3338	34.1059	37.0843	21.456	22.5674
31.1909	23.9108	29.8385	15.9513	21.0133	24.5327	28.223	37.3279	24.012	30.8338	26.8932	17.6335	27.0758	26.635	32.992	20.8862	27.526	28.2365	35.3724	20.0252	22.1684	23.017	25.4164	22.3458	29.2962	19.6181	22.6515	22.5607	19.2574	36.6195	44.4754	28.2476	15.2641	26.8844	28.1831	26.585	22.2925
15.6049	24.4122	15.9468	24.0952	22.5323	28.2295	36.2331	23.7881	18.0547	17.5289	23.1456	21.1498	22.5586	21.6915	23.823	21.1107	26.278	30.5677	24.9053	15.2011	25.3624	25.2251	10.8136	42.9201	27.9815	24.712	14.4434	28.5196	14.5577	23.5593	26.278	17.0564	27.878	31.4634	33.2319	25.5471	22.6934
28.7672	22.3446	26.188	20.3627	29.7467	18.1065	20.8015	20.0884	21.6175	24.7101	31.5274	36.156	22.384	18.4531	25.7821	24.6854	28.0909	21.7952	24.7532	23.0636	33.2808	21.5115	17.4847	23.4816	19.0061	32.4722	26.056	25.6561	17.4539	40.388	32.1837	18.7678	38.5772	23.5615	16.9828	31.5438	37.4696
25.9844	24.1274	20.2091	19.3609	30.5666	32.1649	26.1147	28.6276	24.2534	15.3209	39.5233	26.2638	35.7947	18.0502	33.6202	30.1642	20.928	20.9625	16.926	23.81	16.59	28.3641	28.6207	24.0508	11.3538	17.072	19.6376	27.4729	22.5731	17.2073	19.0825	18.8588	26.5684	30.9364	27.6433	27.5573	20.8074
23.1167	22.2097	28.1465	28.4219	23.2521	17.8567	17.0174	31.4876	23.0311	24.2743	21.5869	29.5823	15.0153	23.9898	29.2203	24.8172	31.1875	29.6175	27.6467	24.8382	24.4452	15.4416	20.3987	23.3871	30.4923	17.6216	35.1154	25.9303	33.4864	18.5732	21.6609	36.993	32.7295	30.632	23.1504	33.8163	13.3151
32.771	21.4837	21.9047	14.7472	22.6985	17.8723	23.2279	22.3033	29.1274	17.3756	19.1001	22.522	32.7834	17.2405	22.7834	29.6684	27.2774	30.0244	27.6558	13.1635	27.2633	29.1617	24.2555	25.787	17.7891	25.619	17.2786	28.0787	29.8207	18.4949	29.2269	21.7571	29.4334	18.0509	18.7569	15.5349	14.6762
16.2438	19.5441	11.2149	10.0332	26.3809	16.4569	17.4202	23.0711	26.0665	22.9618	34.0635	30.0611	17.1153	21.5116	33.2635	16.0572	31.2673	44.6642	18.5711	30.3062	30.0468	17.4921	23.7693	31.5854	21.6063	15.9496	25.0865	9.54353	20.3356	24.9131	18.3319	28.337	23.6282	41.7693	17.352	23.0244	15.9507
23.0685	15.9834	26.6441	22.8081	27.2799	31.8938	25.2616	14.536	19.8638	19.6893	24.2405	19.2186	13.1018	21.7389	10.1997	31.5624	33.4659	13.8832	29.0353	31.297	37.641	32.9823	24.5575	20.8142	12.6867	20.7571	26.0939	21.7535	27.0024	35.7649	24.9795	22.9747	21.9851	35.551	35.8869	24.9205	19.7159
17.9835	15.0619	19.2265	24.2073	22.4299	30.8705	35.7167	29.2438	19.1562	31.8092	19.0044	20.9673	31.1961	19.402	28.4304	25.6761	29.3383	21.8483	22.3012	25.2206	31.6551	24.9876	33.1112	20.8192	35.3646	18.7507	29.0246	21.7083	26.6164	26.2104	23.6529	25.2925	26.9788	22.326	22.5791	16.6135	20.3693
29.0854	25.0157	26.0249	23.474	24.6372	30.4465	18.3866	26.3456	23.2278	30.8682	25.4737	29.7021	43.3046	26.1496	26.8345	27.4206	27.933	34.2222	24.3985	27.9815	26.7344	30.6158	16.2546	26.753	20.8529	19.4969	19.6002	12.3617	15.2417	34.3721	58.6919	16.7553	24.1993	27.0846	23.8007	23.98	22.285
26.7685	20.4137	23.342	19.7501	37.1628	22.4451	23.5078	16.5853	24.121	19.803	25.6561	28.2018	22.0601	19.0502	24.764	25.1292	23.4372	16.3777	36.3126	16.7981	17.8031	30.0656	25.1097	25.5882	22.59	13.291	15.7208	24.4752	21.6881	20.8413	44.8883	24.8722	32.8177	25.5267	32.476	22.7149	28.0367
27.2284	21.0935	22.9561	17.9811	18.4745	28.496	33.3036	21.8274	22.9101	13.4692	23.9985	20.9236	17.4504	20.4129	28.9682	23.027	23.3967	25.7978	29.3438	26.042	24.1604	17.4359	22.4127	11.7335	18.6177	14.7156	31.1303	34.899	29.0841	25.159	18.9384	29.683	36.8905	22.2587	21.6638	24.9467	17.2941
46.685	30.5699	32.9811	17.6228	22.2537	18.1876	45.7242	29.5533	31.9246	14.9011	39.5886	34.3406	23.6844	24.8783	37.7904	21.8307	35.0276	22.076	20.7109	24.0248	27.4302	26.1828	16.0551	27.9869	25.5353	18.8624	37.324	18.0709	34.7	26.7884	16.0049	21.0417	20.6644	26.3817	16.7102	30.3312	32.1279
21.5442	24.5573	22.6094	26.6923	17.8209	17.7067	26.4593	21.8047	28.1328	25.2676	40.4866	29.7892	27.5821	20.3711	23.8447	13.6747	25.4097	20.3446	16.0874	25.7039	20.3006	26.9124	24.9764	25.0352	32.3141	17.476	30.2346	19.4209	22.4203	30.376	36.6009	17.264	20.6283	28.1255	17.9344	37.1425	13.4064
32.4957	24.5175	16.6829	24.9886	30.5107	22.4872	19.6455	31.2039	33.1653	25.8918	17.5294	19.6445	21.6807	17.9147	23.0769	28.3056	24.4822	24.421	21.2377	13.2281	32.5549	13.4446	24.7667	19.4611	29.5754	17.0529	31.3983	22.9068	12.8423	23.5072	41.4071	26.2538	18.1654	27.3549	30.8886	25.3382	24.0492
21.4658	14.8922	28.9047	22.7573	20.0116	18.91	18.6532	21.3713	23.6808	23.3371	20.1973	29.1765	24.0927	14.8229	14.2139	24.9521	18.1644	25.0017	30.5393	30.5152	20.1646	15.0306	21.0732	44.1714	18.1444	20.7415	20.9856	20.3047	27.3532	19.6103	20.4424	26.1163	22.6613	19.564	15.4099	34.8167	24.4621
35.6659	17.9222	19.0166	30.3074	18.1013	27.1887	18.9467	34.5736	17.1606	40.6737	21.8463	20.5044	18.209	21.4633	22.3738	17.0039	19.9507	34.1274	40.1122	15.8212	22.0347	17.9026	29.7217	26.0345	27.6109	8.43425	11.7984	19.8397	23.4177	29.3919	20.93	29.2975	26.542	17.4007	26.425	34.5201	21.4455
31.8001	24.8947	25.6258	16.9572	23.2488	13.9434	15.2618	26.8639	35.0328	21.081	28.0983	20.6833	14.5384	20.7873	20.4732	31.3119	27.5357	21.4853	28.5998	16.4251	23.8691	27.3323	16.6621	26.6953	19.1165	14.5557	34.4649	17.6162	31.7532	17.0507	27.6097	25.3716	11.4363	19.5704	15.9911	26.1547	12.1352
30.7785	25.3527	22.0422	18.6105	30.614	30.0719	44.3443	13.8576	34.9674	24.6433	42.3255	29.4706	34.7968	13.6746	13.6427	25.6795	34.2357	37.025	20.192	21.8695	21.531	23.1362	44.2707	17.1298	28.3828	25.0078	19.6425	23.298	29.0618	40.6741	18.3799	27.6216	19.3814	23.3354	27.5784	18.1797	19.4585
35.3697	22.2331	15.7558	14.5629	28.679	24.5842	23.296	29.3663	9.42103	35.917	24.8772	34.4052	22.3199	26.1478	17.946	35.7259	21.3301	22.2222	22.6643	18.907	25.7048	19.669	17.8582	19.7706	25.5307	30.4573	31.2075	22.3285	19.3071	27.0109	34.2731	20.7665	35.9879	24.8425	35.5718	15.2809	8.8914
49.2952	27.5512	33.8828	16.2287	28.9679	32.4291	22.2494	27.9977	29.5873	24.4466	26.3838	28.2369	27.7799	27.2803	34.721	24.3333	17.634	18.5812	18.2491	16.3948	15.8588	26.3021	8.94151	24.1407	14.8615	12.0535	26.984	28.3237	24.5586	20.0383	21.9335	18.4944	16.1342	34.3485	21.5672	12.5874	22.8259
36.207	25.3927	24.6219	18.1449	18.3375	29.08	22.0605	27.6445	34.9641	20.7037	38.2838	31.9242	20.3692	15.9072	36.2227	23.5503	28.3949	24.3266	43.1607	29.3663	25.5383	21.2274	32.362	23.512	20.3114	12.1383	12.4042	27.4808	17.3718	17.7359	34.3039	36.251	26.8125	14.334	14.3843	25.8097
26.3327	24.2082	17.9361	20.5226	35.101	13.1743	23.4989	24.0315	31.1357	36.0818	20.7851	27.4107	23.6456	26.1734	21.0198	15.5852	25.35	24.4963	20.2635	36.7086	29.9384	15.3401	21.628	22.487	9.46105	20.7154	36.3602	22.9162	20.5358	17.0011	37.4739	25.0539	21.1998	25.9975	20.2885	31.2572
25.827	29.6742	30.0388	20.0001	31.9982	16.6236	21.191	21.2585	29.0582	30.9837	23.4288	32.5901	24.5407	21.5707	19.3198	34.9666	30.0956	19.1473	18.4564	27.7338	27.8096	22.095	19.3699	14.2951	17.4486	19.2979	16.3583	37.1424	17.8418	28.0251	28.4941	22.6453	23.6618	25.2767	22.184	20.6814
24.6118	20.8014	18.7444	26.701	21.8891	22.667	23.4841	35.0711	20.3319	21.1065	17.2186	22.5714	29.9481	18.7608	42.1285	13.4391	14.9126	27.564	27.3775	29.2499	34.4006	17.5434	31.0996	16.0634	18.2196	18.5839	16.0436	35.9705	25.0137	24.852	15.0612	25.3823	21.8854	22.6218	23.9045	32.6532
22.8029	20.1434	37.7586	19.6895	13.7857	25.6139	23.6017	25.8625	16.4939	20.2848	25.153	25.3113	22.9642	14.1182	25.6396	17.0301	24.4224	26.7989	36.6924	26.816	19.3557	13.8943	25.3222	20.0596	23.3618	13.2408	35.8833	28.7885	15.3363	20.5229	21.9498	35.6778	25.583	20.1124	34.4611	19.722
51.6601	30.0788	28.5336	20.826	33.4911	33.5573	23.5085	23.8662	24.4648	29.3393	23.5515	22.216	24.6003	16.0203	23.9425	23.9603	26.1282	22.1434	32.894	38.4828	28.3193	28.9552	28.4525	20.149	20.2674	13.753	15.3651	12.8784	29.7313	26.3849	19.2568	17.2918	17.0878	41.1529	22.7075	19.3129
21.5688	18.5034	22.7811	13.9576	30.2698	22.3622	26.9125	26.8974	30.1459	35.7899	32.941	21.5427	26.107	21.0703	29.7153	24.1713	23.874	25.3121	34.8395	26.2399	22.3247	26.2734	16.1404	11.6687	14.7506	14.5051	26.0229	22.8855	27.0589	26.4123	19.8711	17.0226	32.2634	33.4297	18.1625	29.6749
23.9375	24.2184	23.6963	25.8863	22.8207	27.1063	22.4771	24.8648	16.7386	21.2477	19.1931	23.1511	32.7947	22.3933	23.2645	22.1715	12.4011	30.5982	34.3224	28.6272	29.4227	14.0724	20.9268	17.4102	22.2267		27.3908	35.6683	13.8539	21.0484	12.0112	29.7167	37.6331	13.8176	28.6261	27.6868
36.7885	27.2425	23.7995	32.1292	29.4054	12.4236	16.903	18.4893	15.1857	36.1668	34.0225	15.3401	28.6576	27.8615	20.1553	28.3662	19.4437	18.8582	31.4672	29.2672	26.0585	12.4441	15.1907	17.3183	13.6146		23.5668	37.284	23.2693	19.5623	21.2741	18.6863	30.0055	19.3482	23.1591	39.0013
26.0645	24.1923	10.6318	17.4046	25.1036	20.5239	39.979	11.6573	53.2662	20.5997	28.8526	26.9394	20.3064	24.3165	18.0707	19.7806	25.1829	19.6056	43.1928	36.2097	25.5858	10.4489	10.4443	17.863	18.6699		20.5785	26.1772	25.7958	12.7353	12.4623	25.3625	24.9935	18.6194	24.1257	21.7961
20.5285	28.5921	20.2377	8.36618	22.2523	23.725	28.2866	12.5519	21.0135	27.9573	29.4173	26.5872	22.2481	19.7885	15.4487	17.2107	25.0699	16.408	28.6743	33.4794	18.3257	16.4758	29.3314	21.6491	14.6381		17.4225	29.5169	21.7121	23.9066	16.8184	14.4948	21.6445	22.5871	40.6699	23.9014
41.2805	24.5208	15.9456	13.2455	34.7009	21.9284	34.8797	24.9317	24.1757	23.6663	18.2504	28.1478	29.6196	18.8568	22.3642	16.5099	24.1502	18.7787	24.8265	23.5779	17.4973	25.2186	16.1336	20.7888	23.3208		15.394	32.4905	16.1528	31.2494	22.9735	18.45	28.1365	30.0798	32.5137	40.0314
28.819	27.1479	17.1957	13.3982	18.039	29.3983	28.2666	12.465	18.065	25.8536	31.468	22.8256	22.9829	17.3376	31.3536	14.8955	12.4563	19.8282	18.84	17.4034	14.1496	13.6176	25.7101	20.0154	15.3805		17.039	29.6807	21.5273	27.0621	30.0576	32.6006	22.777	18.8738	9.21911	29.575
22.1644	37.0089	31.982	30.1883	22.0448	14.8267	13.9605	11.0366	35.0606	33.0962	18.7605	39.0156	27.5348	17.7277	30.8839	23.5185	18.7044	23.6491	11.3471	21.319	30.456	14.7171	13.1685	30.9334	27.6227		43.4801	20.0116	18.9636	17.4751	29.7434	47.0916	28.8601	16.0385	19.1034	23.8523
34.0456	27.2708	20.7704	17.4535	29.3082	20.8084	28.5136	18.0467	21.9187	20.2767	23.8891	21.9757	22.3878	20.4055	25.2649	22.2592	18.8955	19.62	25.2136	24.9275	26.4895	14.1351	17.0266	20.5675	12.6809		37.1791	32.9853	8.80915	39.7325	31.4863	36.3414	26.1363	23.0083	30.109	31.0458
18.5463	22.9261	20.8347	22.7055	25.0831	26.021	29.9142	29.9362	22.5747	28.5412	18.7771	29.0631	17.3971	18.0688	25.9261	16.0645	20.4215	24.0755	25.0871	33.3269	12.4388	11.1137	12.8292	13.0605	17.5862		32.9272	22.2886	22.8034	25.2219	35.2882	25.4099	29.6466	30.6378	42.782	17.2435
50.6308	12.2581	31.3946	25.8388	39.8086	28.8936	25.0548	22.0493	26.06	26.6455	17.3166	28.9348	17.8483	29.3149	12.1769	24.6215	24.86	22.83	27.7281	25.5859	14.2634	20.6595	19.8837	17.2176	22.2994		26.0503	26.1924	14.3707	18.6846	25.4213	11.516	9.21258	15.4818	31.7857	17.7368
32.6555	23.9182	25.2226	13.6636	24.7815	27.0106	19.53	26.0225	20.4126	22.7052	24.8147	23.2791	17.1369	20.0606	20.3603	8.3394	12.6526	23.987	30.7677	29.4932	19.8777	15.2797	17.1792	10.2681	15.318		15.808	23.641	27.9603	18.7292	21.6378	20.7574	22.0178	36.9463	28.0588	33.2311
18.4604	18.8692	30.8439	24.431	18.6213	26.7346	13.8166	28.9938	23.6275	18.0317	29.3692	35.6765	29.2325	20.9327	22.5124	12.8271	11.9584	39.1653	45.9842	27.2027	23.977	28.0613	15.3242	8.43774	7.61426		28.5457	19.8328	31.0097	41.0428	32.921	27.7628	21.5989	11.1932	43.5632	20.4498
30.5099	27.885	25.0127	11.3938	21.4236	25.0893	17.1187	19.1194	32.9392	28.1743	26.747	17.4358	33.4303	12.9649	21.6326	24.9527	19.3383	20.5563	22.0997	16.7491	28.0821	12.7602	11.7487	22.6573	13.9301		18.1832	17.5452	19.0768	22.0439	17.9817	18.3898	16.0821	15.516	34.8338	32.9129
29.5192	25.2985	23.7048	17.4315	16.5532	24.9794	27.8617	21.5809	27.843	32.4647	32.3853	47.5787	17.7939	32.3005	23.3417	16.0798	22.4629	30.4561	19.8526	44.8853	12.4263	10.8631	22.4887	20.0294	18.2331		33.6975	25.7972	13.7727	34.227	30.5654	16.6176	26.2022	21.7245	23.9522	25.0472
26.3966	18.1635	32.132	16.5444	15.649	29.1448	29.469	18.4725	28.7037	19.7823	12.105	35.0747	34.3457	13.4797	15.7438	16.306	34.5702	23.4375	24.1045	19.2548	19.7638	17.1653	16.9808	10.2449	28.1211		26.0961	25.9255	11.1348	11.7082	19.9884	18.5973	29.5056	29.6237	29.7384	24.2642
19.6846	20.6685	16.3258	16.1872	31.7338	14.1441	15.1575	12.8997	20.8258	16.3883	17.0944	29.876	19.8689	26.6446	32.5593	28.7563	15.4453	36.3508	32.3012	13.0374	15.7537	18.6897	19.7066	15.3201	15.9234		31.6342	27.5092	15.9952	30.4212	17.7234	17.8004	22.53	17.3906	35.4008	20.296
36.7473	25.7659	24.0107	29.7933	14.7063	31.3521	15.0083	22.4628	34.513	31.6363	25.4329	24.7734	33.3017	35.2616	10.8244	20.5043	16.0981	14.2665	18.4034	33.1005	18.703	27.2246	12.7465	28.4156	27.9423		22.3656	26.0495	15.87	17.0218	20.3311	13.5864	23.6489	17.642	32.3057	32.1712
35.3051	24.3611	31.0148	17.3833	16.0317	17.7035	25.2925	26.7115	24.2892	18.3063	21.37	26.2317	20.8182	29.3307	17.0225	29.8804	30.7451	26.1392	28.8212	12.8142	24.5854	9.6581	14.0658	16.2582	14.927		23.8767	16.6449	10.8139	19.3638	17.7899	21.5445	29.6175	16.5079	26.1174	27.9126
38.6835	33.2409	21.3833	19.5927	18.1282	27.6349	14.4883	19.2598	28.3705	20.1776	27.1401	47.0131	15.6408	14.0643	35.6895	27.4302	29.8786	19.1618	31.6944	15.4541	13.3365	9.91709	12.8711		24.1908		20.8831	35.078	9.3585	14.7601	26.3028	15.2523	19.6377	14.9046	26.2724	11.2874
15.6191	10.8162	24.0944	14.1149	11.9152	24.2469	12.6371	21.9643	26.3377	27.3073	27.6672	28.2134	20.0548	18.326	11.6403	15.9126	32.1584	42.0005	15.9014	38.6723	20.11	13.5596	10.0414				26.9271	32.1926	14.8144	31.0597	32.571	21.3754	27.9615	14.5577	44.9007	27.155
24.7524	15.397	29.17	11.6513	13.5206	24.8281	16.7989	15.6162	6.88325	39.5342	19.9739	26.6481	42.96	31.0745	15.393	23.124	19.1714	17.5543	29.0791	25.3607		13.3584	24.9266				23.0557	14.7023	9.10556	10.0021	24.117	22.4109	18.4668	33.4442	26.989	32.2856
25.51	16.5937	18.7453	12.3163	16.4857	22.3465	27.5697	12.231	36.4417	18.9742	27.2379	36.0994	20.0362	13.056	17.9394	23.6561	12.9847	25.8783	25.8645	22.2946		7.20384	23.8139				31.0203	25.3117	30.0657	22.484	18.1681	17.4544	23.9437	34.2915	22.1275	29.966
19.8121	25.1236	21.7745	14.6087	13.0713	30.2755	22.4064	14.6844	18.4295	28.6495	16.8448	22.3979	14.8105	13.0767	32.2654	14.0531	21.0791	30.4882	24.8938	27.7517			18.4261				29.9307	33.7016	18.4404	17.7867	28.492	8.08879	27.2054	17.95	37.092	29.7218
24.9191	13.4078	25.1154	19.4359	18.9885	20.4938	10.261	16.6511	27.7058	26.3208	20.9493	31.4409	14.0094	18.9142	24.1177	18.4611	29.5721	14.0132	25.7661	21.2646			17.7095				23.534	32.0791	14.4788	23.2479	30.772		37.1801	18.5164	36.0405	29.7758
25.4426	13.1075	16.6457	21.449	9.41991	32.0792	7.96646	15.3156	20.1738	25.8231	23.9094	32.7314	14.6965	13.1688	30.9925	11.3558	26.1911	36.631	14.3778	36.8084			17.1744				35.1801	22.8431	12.0039	23.4143	30.3258		17.3954	10.3799	17.3769	29.3702
18.6836	34.0959	27.3488	14.1823	24.7342	17.6733	14.8038	15.5257	21.483	25.0258	28.8611	36.6359	11.3194	17.6515	22.1547	7.80947	16.6449	25.5057	30.6962	29.9052							18.301	21.142	14.5056	24.2793	23.065		30.8906	8.82386	36.1901	30.4086
22.4677	36.8585	24.6863	10.9146	28.9284	22.2005	2.61228	19.3867	35.7765	23.0804	41.5983	25.8749	11.2204	18.5878	28.6971	30.3627	12.9961	39.2785	23.3502	27.7531							25.6576	19.8585	20.4808	26.988	19.6325		27.6262	17.8091	32.1009	28.9965
20.9244	22.525	29.0311	15.8107	17.8163	24.3606	19.5746	15.0405	43.0356	22.7005	23.1165	17.7009	17.154	28.8232	14.7887	12.4927	13.2731	25.5322	9.48107	21.1418							16.6328	31.3888		21.0704	25.7473		18.5535	16.2702	28.0336	28.3688
24.9842	25.0375	19.92	15.2918	17.4108	24.5098	30.3527	21.1563	16.851	21.2147	26.8434	23.2361	8.09913	11.466	14.0183	23.2684	11.8428	46.9705	27.2724	24.0378							18.1972	37.7421		13.0202	31.1156		16.9909	19.5111	24.9616	30.0344
26.1768	22.5572	29.3902	25.252	28.732	30.1554	25.2405	20.6675	14.7596	29.2997	30.2183	27.8805	13.1097	17.1639	14.1086	13.8621	18.8713	11.6844	20.9704	26.2784							29.0537	18.0162		17.6389	30.5356		21.4332		32.4249	26.5573
20.3364	17.9259	15.5588	31.1501	25.2604	16.983	16.1265	17.3451	11.9734	20.8315	15.7963	29.7605	16.3306	13.1244	18.7849		17.7455	19.8703	24.4874	21.233							23.3979	24.0982		11.1818	22.3634		25.7306		25.7033	20.8592
22.3991	19.5623	14.9996	18.6669	12.4885	14.3469	13.5119	18.8516	13.489	16.7799	22.7382	28.4292	18.1206	15.7964	8.87291		13.2472	29.8685	21.1215	55.1198							11.6911	17.3808		20.1452	24.1112		24.1892		25.8423	23.6253
45.6571	16.0152	26.1981	21.4267	34.1637	15.856	19.9619	21.6124	25.1165	17.2627	43.3832	30.6199	7.60418	14.4367	23.8321		15.6855	18.8718	25.0889	17.2643							33.5582	22.7768		12.9311	19.4155		11.245		34.2331	23.0531
32.4785	12.8792	15.0972	18.2823	30.5433	35.0617	7.09492	27.1274	14.2023	30.0503	24.7264	19.6778	23.6827	9.56567	16.3455		14.2375	28.0172	22.9827	32.9559							34.2523	29.3376		13.6962	31.3473		18.7393		40.7573	26.4102
23.7126	10.3435	21.4856	31.3978	32.5787	32.8443	24.2582	35.1796	15.1236	23.5781	26.4964	38.1211	30.8513	14.0906	17.6016		16.8095	40.2789	41.1539	26.1895							20.5343	24.0516		27.2801	25.3828		28.3558		24.6767	38.9883
42.3147	24.4414	24.4736	26.4128	19.2322	25.1909	15.0413	10.7292	15.1905	22.8462	31.3241	25.8478	9.81214	24.1398	22.199			26.3485	21.5085	23.6014							19.0418	40.5595		18.4655	13.9558		21.7225		30.3933	34.6055
35.959	21.3198	26.8948	22.6975	16.7358	12.2321	22.8998	17.8056	29.3963	26.802	21.7249	33.5398	13.6085	10.3604	13.4727			25.1202	29.3337	37.1781							24.9723	23.6368			18.3435		11.6677		34.3935	30.3945
20.2034	16.6776	24.3334	18.4437	10.6565	15.7441	10.3495	14.6606	26.1435	22.1031	28.5279	35.8059	8.0403	15.4407	14.9351			24.645	30.5901	14.1623							43.0568	18.2974			33.2614		14.8004		40.6404	12.1776
20.0386	12.6826	13.1116	17.4805	17.7101	17.8239	33.4848	22.5628	19.6444	32.4353	18.2755	14.28	13.0715	25.6348	17.9139			24.9716	28.4339	27.158							19.3275	29.0405			21.2549		16.6087		22.7865	34.3773
25.2443	11.9891	37.0393	24.3952	17.4353	14.9237	7.37114	21.0329	10.7969	19.0279	21.657	25.9226	16.8302	14.3183	19.4972			27.9413	28.4999	19.6555							19.1835	23.774			23.7748		12.3131		12.7343	30.5268
25.566	6.7023	15.6442	16.5679	22.9868	29.9727		22.114	17.4851	15.5984	26.5504	43.9493	15.5383	11.7576	12.3947			25.8228	13.1748	25.3953							10.723	28.4303			24.1252		15.7508		28.9374	20.0232
24.8786	12.4646	11.9777		14.5151	12.0627		9.19548	16.0793	16.6249	35.3346	18.7732	8.72929	28.9249	14.386			23.5408	9.02112	30.3416							32.8006	35.8355			16.6528		18.5271		18.8986	31.4395
44.6076		29.7383		11.3551	29.9435		27.8085	11.7875	17.6464	28.1062	22.3368	16.916	12.0905	22.412			41.9338	16.4616	14.8927							22.4994	36.516			28.2489		22.3659		15.7016	21.3608
33.1629		18.7386		15.2657	15.4089		14.1629	18.5014	14.4872	23.8795	30.234	18.9651	14.8553	15.8856			29.3149	29.2448	19.0526							29.9628	29.995			27.1354		25.6202		16.8119	23.4594
17.0775		15.5277		11.9954	12.6546		21.43	31.9904	14.1716	32.0822	16.306	14.4484	16.6665	21.703			19.4531	16.4123	23.9299							27.3549	17.6584			27.9213		23.922		38.3642	29.6226
25.5179		16.5874		20.3501	18.2367		17.6859	23.3401	11.8474	32.2786	14.833	13.8809	14.3687	28.9575			20.3545	16.826	17.7366							24.5551	18.0751			25.7102				42.1782	13.9864
31.2112		14.6708		22.7185	29.1632		9.00221	12.7229	27.995	20.5778	21.3162	13.7901	16.2538	18.9409			29.2738	17.0362	26.1237							20.8762	36.6545			40.9779				32.6743	43.2555
15.2029		21.4195		17.1096	16.0492		8.61962	24.0825	13.1067	18.1421	22.6302	17.825	16.5785	12.7029			31.4254	22.2448	31.1217							19.4407	19.9711			31.1295				26.0272	18.5662
36.3144		8.87922		30.0709	20.6024		8.45818	20.6851	15.0492	10.2183	30.2594	10.2476	9.6762	26.0661			18.5357	29.4045	23.3951							22.2184	28.8247			30.9034				27.9294	25.8435
16.6193		21.099		15.7963	21.4141		32.2382	15.7476	13.2525	19.2241	18.8006		15.3053	18.2096			29.5928	23.9268	14.8808							29.8607	33.5106			22.6125				22.3609	25.2719
32.0559		26.437		12.2673	13.5455		13.9377	15.0443	26.9732	12.4006	17.2264		11.5899	16.6586			33.6739	20.3877	20.3283							30.165	27.4153			24.7663				24.3714	16.588
30.518		20.0562		29.4775	21.2602		11.8807	19.4095	13.3227	15.3761	18.4366		10.5771	14.8947			35.0599	22.8237	34.0223							26.3901	17.768			25.9705				25.6748	18.2403
27.5112		19.6889		18.3685	32.5319		8.20471	14.6812	15.1167	20.1925	13.7125		23.4661	13.5882			34.0885	21.5688	11.0024							18.0873	18.9161			23.135				24.0538	36.6943
25.8599		23.2897		21.5945	13.779		15.7787	11.4934	24.9051	25.4364	21.3144		9.65485	10.7944			19.3129	11.4609	18.0962							28.9265	19.8428			26.837				27.3621	36.4412
22.2441		20.998		11.3156	38.0464		11.5257	22.5798	18.9342	12.632	26.2041		20.2737	9.32418			25.4481	17.4014	16.2748							15.2641	15.4453			26.2345				32.4386	16.2074
28.1193		15.116		11.553	21.6607		13.5196	21.2628	20.5555	21.7784	13.1996			17.2735			45.2041	13.6892	25.6502							28.3729	29.5807			22.7504				28.0871	20.2982
20.1635		12.8875		12.7041	26.2135		19.9749	7.23894	16.1474	24.6518	19.8319			18.0616			25.2811	10.0537	34.0235							23.4902	17.7782			35.2988				25.748	15.5147
18.3804		18.6791		10.806	43.0621		23.4745	18.6187	21.3452	26.0321	30.8136			18.609			24.3474	22.3321	25.6609							21.5453	18.9184			31.9612				21.7875	9.19619
22.9016		17.0635		11.5114	26.2239		29.6888	20.9042	18.2567	17.1367	19.0927			8.53867			38.301	18.0586	22.9863							25.4704	31.0775			30.6939				15.8546	20.4519
21.8247		17.9881		10.2087	18.0958		19.8398	13.2653	14.901	13.7477	32.3744						34.6887	25.09	26.9025							21.7597	20.5587			34.492				26.9456	23.5709
20.0603		12.9829		15.1568	15.5229		16.9943	33.4948	12.5798	21.1553	22.9833						17.461	18.2517	33.1608							14.175	27.2177			35.3206				32.1102	31.7009
13.8878		18.8796		12.4202	13.3437		15.2145	6.27084	8.36077	18.6902	19.1166						19.0344	23.087	17.1562							43.5763	13.387			16.311				20.0089	18.9955
12.0405		30.999		8.97232	22.1152			15.9631	15.0557	15.6129	12.6635						9.42978		15.2537							22.1254	28.1159			22.1006				21.1181	15.2584
29.7868		24.7161		11.2183	12.173			12.0439	10.1447	10.5575	28.4727						18.854		15.755							29.0271	12.2756			24.8809				30.1623	20.9286
27.1342		12.8078		28.9217	16.8351			22.2023	26.5216	14.7033	16.5075						25.317		15.1869							14.9015	29.4444			18.7714				18.6862	16.9088
18.6724		20.8305		25.1215	31.2057			10.0505	21.05	6.92634	15.6611						29.1406		17.9997							19.9747	25.1869			26.0425				46.0565	15.696
24.0482		16.4208			11.3726			11.0051	11.4723	11.5614	13.8194						18.7237		22.2539							25.3882	17.5411			10.9568				25.9245	16.4946
6.97824		10.4315			17.2351			8.56581	22.5058	15.9096	31.2563						22.9376		11.404							36.4305	14.7397			26.8179				21.1831	16.382
21.0024		23.8064			19.3514			15.9868	18.4244	9.87211							11.25		18.0269							32.6328	25.316			15.4587				27.1166	20.0158
27.2433		13.7353			10.5699			14.8351	9.40003	16.5803							19.6718		16.6285							20.9452	18.5044			10.1405				20.5736	16.6139
34.3858		14.7715			18.5192			11.0178	14.251	13.2244							15.1338		26.8416							30.3824	18.2468			32.3295				16.9366	25.2663
17.9071		10.8475			35.0959			13.7631	13.7844	8.61074							23.2121		15.9857							10.2081	20.0386			20.3052				15.9968	28.6447
30.7483		24.8669			26.1724			14.2188	28.1858	25.0959							23.9155		29.3299							17.2667	14.9988			22.6336				16.4807	31.8333
14.7778		12.1398			9.28547			13.0331	20.3102	23.3869							20.8042		23.2609							34.4553	23.3288			18.3221				18.2779	17.5148
16.7614		24.4509			14.245			26.3471	9.5003	21.1341							16.0979									28.8877	9.54265			19.5263				12.1283	18.7998
15.8143		11.5045			6.82657			15.5467	14.5426	20.4229							13.9593									26.4339	22.499			15.7192				15.984	27.6876
20.7929		14.4724			17.4234			27.8155		16.6404							16.8148									14.8609	15.4025			26.7774				12.1747	31.9514
17.741		15.1095			15.6586			8.5995		19.2507																26.5746	9.79825			28.9387				12.2099	18.2644
20.2744		9.2738			9.07439			30.6502		14.8427																23.9369	13.7646			12.0057				17.4921	11.1606
17.5075		10.9965			9.9581			20.6352		11.6509																22.1888	20.6933			18.0064				15.8692	15.2405
27.8985		12.5145			15.1553			26.6257		22.0668																32.1851	21.5183			9.21364				22.5425	34.8053
18.6751		16.1363								25.6136																22.8408	15.5343			10.2728				15.9926	14.5968
8.37084		12.7517																								29.4934				13.7215				23.432	13.7922
11.9074		17.3355																								26.3846				11.9754				19.087	20.5491
21.4922		16.575																								19.8256				7.92503				21.8741	35.4743
23.9383		17.329																								11.9469				12.2148				24.1606	37.9751
18.1418		17.3318																								17.4515				18.0356				8.30186	32.428
16.5996		22.9657																								16.5644				29.294				9.04331	29.371
12.0938		16.2331																								22.5948				27.3807				8.51802	17.1733
10.0954		9.36912																								12.1974				24.0376				11.0415	31.8534
12.9901		9.40975																								15.4629				18.4036				10.2744	23.8377
20.3323																										31.773				10.2051				9.05603	18.0866
26.6394																										21.7404				10.731				16.4544	12.9704
16.1893																										14.8277				14.5486				12.4452
20.9462																										14.4182				17.3579				19.0625
14.3646																										9.73597				9.17606				12.6096
10.2752																										9.02184				16.1809				22.4728
19.5335																										16.621				20.7851
21.7844																										20.5487				10.1622
10.8026																										33.2166				13.8403
7.86771																										17.5769				12.1828
26.3026																										17.8159				18.0509
30.771																										23.2862				16.0764
17.5127																										25.4567				17.9935
19.5119																										12.2695				18.8661
10.4668																										34.2149				13.8622
16.4744																										32.8012
28.1379
29.3594
25.3624
9.98897
17.6859
19.6314
13.4112
13.6055
12.177
12.3005
12.2174
11.1022
17.0786
19.8431
17.1253
14.9833
17.1312
14.1997
