# Supplementary material for: Control of plant cell fate transitions by transcriptional and hormonal signals
Source: eLife journal article supplement (doi:10.7554/elife.30135), 2017-10-23
Supplement: supp [file elife-30135-supp-v1.zip › elife_poa_e30135_Supplementary_file_1.xlsx]

## Sheet: Table1_CYC-MOCK_vs_CYC-DEX_3h
Loci	logFC	logCPM	PValue	FDR
AT5G13150	6.49784	2.66237	6.34e-82	1.46e-77
AT1G20790	6.53057	0.813202	4.27e-31	4.91e-27
AT5G40350	-4.2071	1.10664	3.02e-28	2.31e-24
AT3G14900	1.62061	4.57902	2.45e-26	1.41e-22
AT1G68250	-2.66154	1.88685	1.78e-25	8.16e-22
AT5G57250	2.14843	2.34116	3.13e-23	1.2e-19
AT4G28652	2.00641	2.61236	9.49e-23	3.11e-19
AT3G21560	1.81467	2.46216	2.8e-18	8.04e-15
AT5G28360	3.83056	0.44571	9.46e-18	2.41e-14
AT2G34020	4.93259	0.117899	3.62e-17	8.32e-14
AT3G61510	3.94093	0.0569518	3.49e-15	7.29e-12
AT1G70940	2.065	1.46812	5.78e-15	1.11e-11
AT3G61490	1.96792	1.51666	1.56e-14	2.75e-11
AT2G01420	2.31056	1.14175	3.2e-14	5.24e-11
AT1G16489	1.38383	2.57485	9.52e-13	1.46e-09
AT1G09570	1.29177	2.9278	1.42e-12	2.04e-09
AT4G27190	1.7747	1.52815	3.12e-12	4.21e-09
AT5G52310	-1.4502	2.07205	9.67e-12	1.23e-08
AT3G27809	-6.77647	-0.618508	2.73e-11	3.2e-08
AT1G72960	2.65467	0.239102	2.79e-11	3.2e-08
AT1G23050	1.69602	1.527	3.26e-11	3.56e-08
AT2G31751	0.959671	4.25587	3.09e-10	3.23e-07
AT2G36570	1.17484	2.21391	1.4e-08	1.4e-05
AT1G60545	-0.80824	5.14866	1.48e-08	1.42e-05
AT1G17232	0.817798	4.61829	2.56e-08	2.35e-05
AT3G62810	1.67802	0.933649	4.99e-08	4.41e-05
AT3G60957	1.76294	0.570068	1.55e-07	0.000131424
AT1G72610	0.754711	4.42534	4.02e-07	0.000318332
AT5G43650	-2.71219	-0.462151	4.02e-07	0.000318332
AT1G71528	-0.743075	4.10758	1.09e-06	0.000836309
AT4G37370	-1.12379	1.49923	1.51e-06	0.00111588
AT5G51800	1.40153	0.960742	1.93e-06	0.0013855
AT4G39210	1.44844	0.727874	3.25e-06	0.0022583
AT5G25610	0.863862	2.63878	3.92e-06	0.00261212
AT5G01542	-0.661621	4.61292	3.98e-06	0.00261212
AT4G31610	0.867904	2.60864	5.28e-06	0.00336721
AT1G06080	1.17957	1.36756	5.49e-06	0.00340433
AT2G19060	2.92178	-0.993832	8.27e-06	0.00499823
AT4G14130	1.22614	0.968791	1.38e-05	0.007998
AT1G23080	0.958074	1.97726	1.39e-05	0.007998
AT5G25460	0.851222	2.39478	1.44e-05	0.0080595
AT4G18970	1.29633	0.855381	1.95e-05	0.0106728
AT3G27810	-2.31282	-0.414228	2.1e-05	0.0111988
AT1G09310	0.839876	2.25683	2.41e-05	0.0125838
AT2G47790	1.10877	1.23821	2.68e-05	0.0136851
AT4G15160	1.26512	0.799955	2.81e-05	0.0138438
AT4G36260	0.617209	4.47686	2.83e-05	0.0138438
AT3G60960	0.90131	1.88177	3.12e-05	0.0149059
AT1G77880	2.01045	-0.208521	3.49e-05	0.0160351
AT1G06920	1.89902	-0.185497	3.49e-05	0.0160351
AT2G44810	-1.08095	1.56302	3.85e-05	0.0173152
AT1G68620	1.2341	0.744921	4.07e-05	0.0179614
AT4G25760	1.5315	0.250871	4.53e-05	0.0196368
AT2G03770	-0.773819	2.38004	5.19e-05	0.022046
AT1G18000	0.619167	4.06667	5.32e-05	0.022198
AT4G39510	0.85538	1.83988	6.13e-05	0.0251258
AT2G18500	-1.44688	0.371137	6.85e-05	0.0275781
AT3G50760	-1.09747	1.01818	7.3e-05	0.0289054
AT1G30840	-5.36991	-1.58077	7.5e-05	0.0291889
AT4G28680	1.58179	0.0913319	8.06e-05	0.0308283
AT1G55210	0.904726	1.77204	8.59e-05	0.0314008
AT5G63650	1.21863	0.686147	8.62e-05	0.0314008
AT5G07000	1.21128	0.684894	8.62e-05	0.0314008
AT3G61700	1.0055	1.29373	9.09e-05	0.0326249
AT2G23450	-1.25575	0.334305	0.000129629	0.0454363
AT1G59265	0.569779	4.31522	0.000131987	0.0454363
AT4G35190	0.780128	2.3066	0.000132907	0.0454363
AT5G41080	-1.10714	0.98404	0.000136187	0.0454363
AT5G47435	-0.830964	1.96053	0.000136546	0.0454363
AT1G74545	5.16119	-1.68073	0.000145997	0.0472125
AT2G11100	5.04961	-1.73936	0.000145997	0.0472125
AT1G20970	0.606259	3.69005	0.000150872	0.0481115
AT1G23052	1.18408	0.46037	0.000159518	0.0501718
AT2G15810	1.00217	1.26531	0.000191661	0.0594669
AT1G10640	-0.878133	1.66652	0.000206763	0.063297
AT3G45290	0.753354	2.09097	0.00021072	0.0636596
AT1G19220	-0.677074	3.00973	0.00022233	0.0662946
AT1G73066	-1.74455	-0.233697	0.000243089	0.0715555
AT1G32910	-0.997288	1.0051	0.000248036	0.0720874
AT5G60800	-0.746027	2.0286	0.000275512	0.0790718
AT3G23370	-0.906528	1.5238	0.000280246	0.0794376
AT1G72190	0.954435	1.19753	0.000288927	0.0808996
AT1G71520	-1.05706	0.864304	0.000302958	0.0838063
AT1G25550	-1.35399	0.0245548	0.000325627	0.0890047
AT1G14360	0.739904	2.11879	0.000334568	0.0903727
AT5G20250	-0.604326	3.25541	0.000353584	0.0943986
AT3G01500	-1.3254	0.244183	0.000369885	0.0976155
AT3G58620	-1.2277	0.421411	0.000384334	0.0991785
AT3G61970	1.67031	-0.336482	0.000384446	0.0991785
AT1G20440	-0.928873	1.0651	0.000396707	0.101204
AT4G39610	-2.50426	-1.01439	0.000434145	0.109538
AT2G43620	-1.86075	-0.578481	0.000460979	0.115044
AT5G14920	0.851809	1.51922	0.000476799	0.116484
AT5G65730	-0.999463	0.879141	0.000487559	0.116484
AT1G70410	-1.80257	-0.745138	0.000488654	0.116484
AT4G30250	-0.630494	2.97449	0.000489928	0.116484
AT1G28685	0.490083	5.15252	0.000492113	0.116484
AT1G31550	-0.836733	1.40557	0.00050659	0.118616
AT4G36032	-0.532217	3.90006	0.000512424	0.118616
AT1G02800	0.824342	1.5487	0.00051662	0.118616
AT3G61460	0.57948	3.2258	0.000556648	0.126541
AT2G34980	1.0386	0.646514	0.000588969	0.132576
AT1G09200	-1.13591	0.443813	0.000604927	0.134846
AT3G30775	-0.631112	2.80373	0.000616179	0.136033
AT1G75800	-0.821534	1.50822	0.000628148	0.137355
AT3G60390	1.05182	0.692292	0.000674846	0.146174
AT3G50660	-1.14546	0.315318	0.000731954	0.157062
AT1G30490	-0.78762	1.49795	0.000749679	0.159376
AT3G26500	-1.49078	-0.310555	0.000758182	0.159521
AT1G14686	-1.93374	-0.804446	0.000764256	0.159521
AT5G35460	-1.82465	-0.870855	0.000775028	0.160312
AT4G17900	-1.08539	0.584704	0.000857796	0.175848
AT2G05940	-1.19432	0.307897	0.000869141	0.176597
AT2G22821	2.92201	-1.33622	0.000896721	0.179032
AT4G11780	2.84482	-1.3802	0.000896721	0.179032
AT4G00150	0.642816	2.3205	0.000940371	0.186129
AT3G30213	0.940192	0.866729	0.000980562	0.192425
AT3G13510	0.559186	3.17914	0.00101277	0.195835
AT4G36360	0.594855	2.89452	0.0010212	0.195835
AT2G34990	1.09788	0.327368	0.00102353	0.195835
AT3G13175	-1.63735	-0.604441	0.00106217	0.20155
AT5G42100	-0.719103	1.96245	0.00107155	0.201661
AT4G23440	0.728318	1.77593	0.00110805	0.204412
AT1G67855	-1.26105	0.0317538	0.00110841	0.204412
AT1G17830	1.1865	0.240179	0.00111287	0.204412
AT1G58889	0.478868	4.35566	0.00112693	0.205351
AT1G18382	-0.751225	1.65767	0.00113627	0.205424
AT3G49220	-0.804521	1.32944	0.00121291	0.216194
AT1G22650	-2.02569	-0.907845	0.00122718	0.216194
AT5G43660	-1.91089	-0.820203	0.00122718	0.216194
AT2G17490	0.510154	3.60075	0.00123351	0.216194
AT1G26680	-1.62346	-0.500274	0.00134055	0.232886
AT1G72970	0.599733	2.67529	0.00134904	0.232886
AT3G05200	-0.759891	1.61829	0.0013728	0.23522
AT3G20015	0.646117	2.17732	0.00139919	0.237966
AT1G28190	-0.813956	1.20326	0.00142283	0.239355
AT1G53440	0.501726	3.85012	0.00142821	0.239355
AT5G48180	0.764862	1.62346	0.00151046	0.249879
AT1G56145	-0.666391	1.99554	0.00151277	0.249879
AT2G23170	-0.709549	1.79144	0.00153627	0.251948
AT3G16180	-0.821228	1.43874	0.00154873	0.25219
AT3G05980	-2.31607	-1.37789	0.00157204	0.253851
AT1G64660	1.37465	-0.18254	0.00159209	0.253851
AT5G65140	-1.35294	-0.167075	0.00159209	0.253851
AT5G23510	-1.13582	0.171931	0.00170017	0.269214
AT1G03940	0.523915	3.33924	0.00171876	0.270293
AT1G09575	1.49635	-0.449158	0.00177025	0.276496
AT2G20670	-1.08842	0.33758	0.00181981	0.279722
AT3G15356	-0.962069	0.564706	0.00182883	0.279722
AT5G54720	-1.21894	0.00843722	0.00184841	0.279722
AT2G12462	0.873981	0.915654	0.00185258	0.279722
AT5G38212	-0.459804	4.53443	0.00185654	0.279722
AT1G80440	-0.740928	1.68391	0.001864	0.279722
AT1G72520	-0.743224	1.26902	0.00195372	0.290037
AT1G77660	-2.25227	-1.1629	0.001958	0.290037
AT3G24332	2.02399	-1.04887	0.00198007	0.291426
AT1G25370	-1.06264	0.176454	0.00200098	0.292628
AT5G15390	1.42151	-0.311223	0.00202478	0.294234
AT3G55970	-3.30442	-1.63431	0.00208794	0.301505
AT3G57700	0.558954	2.76914	0.00212246	0.304522
AT3G51660	-4.80391	-1.87554	0.00213537	0.304522
AT2G32020	-0.639255	1.6858	0.00216855	0.30604
AT3G18900	-1.66956	-0.57954	0.00218103	0.30604
AT3G25710	-0.930102	0.808518	0.002186	0.30604
AT2G45150	1.12664	0.1514	0.00228359	0.317654
AT1G22370	-1.02619	0.621655	0.00231046	0.317654
AT3G07550	0.920321	0.637679	0.00231046	0.317654
AT4G39340	0.603895	2.17331	0.00237066	0.32399
AT5G01110	-1.67752	-0.690743	0.00240257	0.324489
AT2G27830	-1.63905	-0.712287	0.00240257	0.324489
AT5G16010	0.759922	1.30713	0.00243205	0.326549
AT1G77992	-0.570605	2.64346	0.00252479	0.337031
AT4G33910	0.934705	0.583173	0.00262592	0.348503
AT1G78860	-1.1136	0.158505	0.00266922	0.352214
AT3G62150	-0.70704	1.18949	0.00271235	0.35586
AT1G18010	0.459519	4.04627	0.00279501	0.364622
AT2G46572	-0.515093	3.07174	0.00281876	0.365642
AT2G41100	-0.500738	2.94607	0.00286765	0.368679
AT3G22180	-1.38903	-0.548925	0.00287785	0.368679
AT4G39090	0.547382	2.87558	0.00289034	0.368679
AT1G72850	0.480559	3.34761	0.00305215	0.387167
AT4G37050	0.587282	2.18838	0.00313353	0.39342
AT1G70560	0.790311	1.23544	0.00313571	0.39342
AT5G19150	0.689342	1.49512	0.00319244	0.39526
AT5G23130	-2.17453	-1.20397	0.00320362	0.39526
AT1G12710	1.59856	-0.584647	0.00321924	0.39526
AT1G02850	-1.37524	-0.558423	0.00321924	0.39526
AT2G17650	-1.33677	-0.403127	0.0032619	0.398368
AT3G01680	-1.20106	-0.124169	0.00329718	0.400547
AT1G17510	0.7536	1.15829	0.00339136	0.406063
AT2G36792	-0.407943	5.16493	0.00339252	0.406063
AT5G58640	0.763616	1.36863	0.00339565	0.406063
AT4G17250	-0.560765	1.7872	0.00349225	0.41438
AT2G32150	-0.745039	1.20362	0.00350129	0.41438
AT5G33382	-1.38574	-0.289958	0.00355874	0.416882
AT5G18820	-1.18081	-0.271781	0.00355874	0.416882
AT4G30993	1.43007	-0.688965	0.00358541	0.417873
AT1G62480	-0.48929	3.32186	0.00369535	0.428281
AT1G13710	-0.489565	3.31198	0.00371202	0.428281
AT2G33380	1.17715	-0.168122	0.00377759	0.433668
AT1G12150	0.560276	2.15592	0.00393965	0.450021
AT4G30650	-1.52651	-0.780501	0.00396888	0.451116
AT3G17030	-0.597597	2.24419	0.0040738	0.457619
AT1G03495	0.459045	3.47658	0.0040769	0.457619
AT1G11300	-1.07194	0.186221	0.00408588	0.457619
AT4G31800	-0.724671	1.03224	0.00412124	0.459338
AT1G22230	-1.49345	-0.578576	0.00418447	0.464132
AT1G28130	-0.987013	0.560666	0.00423015	0.466943
AT1G56660	-0.752823	1.10243	0.00425672	0.467452
AT1G09950	-1.80826	-0.876668	0.00435573	0.467452
AT2G19650	-1.76083	-0.906438	0.00435573	0.467452
AT4G27310	1.74639	-0.875547	0.00435573	0.467452
AT2G35750	1.69992	-0.906961	0.00435573	0.467452
AT1G27921	-0.484981	3.10621	0.00436863	0.467452
AT5G62350	-0.723242	1.16608	0.00437727	0.467452
AT3G08730	-0.61443	1.99352	0.00444488	0.472475
AT4G37895	0.41457	4.60527	0.00456579	0.48309
AT4G13540	0.549371	2.31662	0.00466848	0.491689
AT4G15760	-0.634659	1.5838	0.00471473	0.491734
AT4G31450	1.89358	-0.946616	0.00472197	0.491734
AT5G66055	-0.565057	2.17383	0.00475658	0.491734
AT5G59680	-2.6306	-1.52347	0.00477186	0.491734
AT2G16430	0.795779	1.08099	0.00477599	0.491734
AT2G47130	-0.889368	0.524023	0.00482867	0.492988
AT2G28840	0.593239	1.95837	0.00483111	0.492988
AT1G16120	-1.706	-1.08997	0.00502813	0.509863
AT4G36750	-0.564427	2.26682	0.0050409	0.509863
AT3G58520	0.762389	1.08142	0.00512652	0.51573
AT1G51800	-2.30417	-1.37895	0.00517376	0.51573
AT5G65100	-1.85621	-1.37561	0.00517376	0.51573
AT1G02710	1.00403	0.320901	0.00521006	0.51573
AT1G68260	2.04141	-1.2463	0.00521121	0.51573
AT5G06530	-1.61983	-0.721671	0.00532021	0.522017
AT3G18535	1.56345	-0.722735	0.00532021	0.522017
AT3G60164	0.922997	0.549385	0.00534551	0.522268
AT4G15430	1.03138	0.0911962	0.00541009	0.526338
AT3G24480	-0.592466	2.03674	0.00564921	0.547282
AT5G02190	0.70488	1.21519	0.00569854	0.54842
AT4G34412	-0.842573	0.786384	0.00572776	0.54842
AT1G76110	0.743118	1.06615	0.00575423	0.54842
AT2G46520	0.554366	2.30265	0.0057565	0.54842
AT1G74070	0.424387	3.79616	0.00581377	0.550129
AT3G53810	-0.995381	0.331497	0.00584632	0.550129
AT1G75540	0.9834	0.349807	0.00584632	0.550129
AT1G20450	-0.430943	3.76512	0.00592592	0.555343
AT3G60160	0.801463	0.850359	0.00595567	0.555863
AT1G76892	-0.522906	2.49053	0.00598557	0.556391
AT3G55900	-1.22603	-0.161979	0.0061586	0.567877
AT2G38180	1.03375	-0.130192	0.0061586	0.567877
AT2G30250	-0.672864	1.14993	0.00627265	0.575353
AT2G45590	0.611553	1.82064	0.00628979	0.575353
AT1G59590	-0.532733	1.96557	0.00643555	0.58635
AT4G08100	0.431078	3.6306	0.00652574	0.592218
AT4G00760	0.611766	1.72227	0.00662639	0.598984
AT3G10550	-1.01131	0.299075	0.00671951	0.602656
AT2G31870	-0.951483	0.331191	0.00671951	0.602656
AT2G24230	0.398814	4.38419	0.00677255	0.60505
AT1G29980	0.606506	1.87339	0.0068057	0.605654
AT1G69710	1.25326	-0.686141	0.00689735	0.608806
AT1G05010	-0.745399	1.06123	0.00691839	0.608806
AT3G05415	0.403888	4.2153	0.00693255	0.608806
AT1G19040	3.02007	-1.7485	0.00694717	0.608806
AT4G17870	-0.56869	2.10493	0.0069879	0.610046
AT1G26230	0.575494	2.046	0.00710109	0.617579
AT5G01215	0.367988	5.83603	0.00716491	0.618249
AT1G03560	1.13451	-0.126771	0.00721203	0.618249
AT5G03415	-1.03091	-0.106889	0.00721203	0.618249
AT5G40690	-0.99764	-0.0124249	0.0072165	0.618249
AT2G42700	0.934761	0.406067	0.00725063	0.618864
AT1G69180	-1.57276	-1.01254	0.00731068	0.621679
AT1G68640	-0.841716	0.700076	0.00739342	0.626395
AT5G01075	0.53729	1.9939	0.00748327	0.631676
AT5G24530	-1.33429	-0.574996	0.0075599	0.635807
AT3G52460	-0.630034	1.69942	0.00759431	0.63637
AT1G30360	-0.621255	1.45096	0.00771658	0.644264
AT5G27750	1.51113	-0.753576	0.00784629	0.652123
AT3G22910	-0.662952	1.10418	0.00788075	0.652123
AT1G15430	-1.81712	-1.19851	0.00793697	0.652123
AT2G36870	1.0088	0.185892	0.00795271	0.652123
AT1G48370	-0.987835	0.185948	0.00795271	0.652123
AT3G53260	-0.794158	0.721517	0.00802457	0.653649
AT2G27310	-0.45448	3.26372	0.00802826	0.653649
AT3G47480	-2.52248	-1.58015	0.00825048	0.660818
AT3G10080	-2.52096	-1.57901	0.00825048	0.660818
AT3G27400	-2.52027	-1.57908	0.00825048	0.660818
AT4G35160	-4.49466	-2.01318	0.00826022	0.660818
AT5G45469	4.46599	-2.01265	0.00826022	0.660818
AT4G24040	-1.06156	-0.0820736	0.00835896	0.663052
AT1G15160	0.401848	4.15529	0.0083985	0.663052
AT3G59150	-2.0255	-1.28701	0.00842184	0.663052
AT5G24160	-1.72743	-1.24694	0.00842184	0.663052
AT1G09970	-0.418793	3.59038	0.00847013	0.663052
AT3G50890	0.573016	1.81732	0.00849055	0.663052
AT1G05490	0.654584	1.48587	0.00852652	0.663052
AT3G45780	0.681406	1.38502	0.00855358	0.663052
AT5G63100	2.74844	-1.42836	0.00861082	0.663052
AT1G10585	-2.21616	-1.42941	0.00861082	0.663052
AT2G20550	0.748519	0.946692	0.00862081	0.663052
AT1G69295	-0.94408	0.2965	0.00863469	0.663052
AT1G10417	-1.44104	-0.609164	0.00869787	0.665677
AT5G62360	-0.729565	1.05521	0.00884528	0.673856
AT1G17500	0.615625	1.5823	0.00886343	0.673856
ATCG00730	0.872602	0.22964	0.0089248	0.676282
AT1G52600	0.717504	1.19337	0.0089686	0.677366
AT2G41510	0.484774	2.51105	0.00903557	0.680186
AT2G43800	-0.482615	2.75285	0.00920712	0.68897
AT2G45160	-0.528474	2.35844	0.00923489	0.68897
AT5G56230	1.25279	-0.493667	0.009251	0.68897
AT4G37390	-0.620239	1.5951	0.00927229	0.68897
AT5G50850	-0.68567	1.08436	0.00941032	0.69697
AT1G19835	0.694295	1.14807	0.00946464	0.69874
AT5G24640	-1.1191	-0.372456	0.0095681	0.699633
AT1G04310	0.858549	0.649305	0.00959435	0.699633
AT3G06483	0.809386	0.648552	0.00959435	0.699633
AT1G67365	1.03385	-0.0615342	0.00959863	0.699633
AT3G01750	0.886357	0.496559	0.00968803	0.703915
AT2G37710	-0.529673	2.07452	0.00987834	0.713537
AT3G61830	0.521929	2.15151	0.00994099	0.713537
AT1G70750	-0.640321	1.42499	0.00994571	0.713537
AT5G01020	-0.638254	1.32799	0.0100211	0.713537
AT4G36160	-1.63195	-0.97549	0.010038	0.713537
AT2G18890	-1.45225	-0.944889	0.010038	0.713537
AT5G16480	1.39245	-0.943869	0.010038	0.713537
AT2G34186	0.829605	0.562845	0.0100811	0.714389
AT5G56544	-0.508246	2.62628	0.010176	0.718895
AT1G10170	-0.411316	3.44819	0.010255	0.719075
AT2G35420	0.42305	3.55435	0.0102666	0.719075
AT4G38520	-0.740432	0.87874	0.0102725	0.719075
AT4G36250	0.554385	2.049	0.0103423	0.721762
AT2G41990	0.773376	0.68025	0.0103993	0.723538
AT2G24850	-0.63195	1.79944	0.0105291	0.730359
AT5G21150	-0.687678	1.22402	0.0106081	0.731668
AT1G06250	0.396297	3.81316	0.0106295	0.731668
AT4G39790	1.00518	0.0899246	0.0106436	0.731668
AT5G66690	-1.21904	-0.552892	0.0107164	0.734471
AT4G27260	-0.64957	1.4529	0.010942	0.744231
AT4G14190	0.935183	0.279447	0.0110539	0.744231
AT1G24881	0.887419	0.289164	0.0110539	0.744231
AT3G20320	-0.884043	0.260391	0.0110539	0.744231
AT3G15610	0.538328	1.95885	0.0111395	0.744231
AT5G67430	-1.03071	-0.104382	0.0111526	0.744231
AT5G65990	0.477567	2.73452	0.0111605	0.744231
AT4G15090	0.673376	1.20132	0.0112174	0.744231
AT5G22920	-0.722863	1.12532	0.0112262	0.744231
AT2G18030	1.64654	-1.08543	0.0112397	0.744231
AT1G28390	-0.526774	2.1613	0.011241	0.744231
AT3G62630	0.574111	1.55537	0.0112477	0.744231
AT4G28020	1.0777	-0.29277	0.0112891	0.744822
AT2G42320	-0.783928	0.754885	0.0114627	0.751991
AT2G38350	-1.37653	-0.752983	0.011496	0.751991
AT1G51805	-1.33068	-0.777685	0.011496	0.751991
AT5G61440	-0.795416	0.533735	0.0115322	0.752215
AT2G24545	0.753433	0.80598	0.0116295	0.756014
AT1G15380	-0.868807	0.369223	0.0116563	0.756014
AT3G26210	-0.919691	0.0975436	0.0119445	0.772524
AT1G23260	0.878939	0.328809	0.0122097	0.787457
AT4G25640	0.598402	1.56799	0.0122521	0.787478
AT2G14520	-1.22927	-0.635723	0.0124248	0.787478
AT3G19200	-1.80824	-1.20103	0.0124385	0.787478
AT3G61070	-0.409532	3.69311	0.0124621	0.787478
AT3G61260	-0.811622	0.551134	0.0125192	0.787478
AT1G73500	-0.741959	0.538325	0.0125192	0.787478
AT5G07640	-3.07146	-1.75162	0.0126008	0.787478
AT2G29490	3.01443	-1.75389	0.0126008	0.787478
AT2G22190	-2.94218	-1.81158	0.0126008	0.787478
AT3G45950	2.88858	-1.80927	0.0126008	0.787478
AT2G33060	0.368275	4.38273	0.0126181	0.787478
AT2G31750	0.444701	2.93691	0.0126392	0.787478
AT2G26080	-0.4835	2.60603	0.0126559	0.787478
AT2G19860	-0.855252	0.236747	0.0127682	0.792317
AT1G73370	-0.525338	2.49439	0.0128762	0.796723
AT4G38410	-1.12546	-0.520317	0.0129452	0.796723
AT5G01810	-0.710969	0.73053	0.0130274	0.796723
AT3G46790	-1.13667	-0.287296	0.0131535	0.796723
AT5G64630	1.06781	-0.229982	0.0131535	0.796723
AT5G17670	-1.0573	-0.268169	0.0131535	0.796723
AT2G40110	-1.5127	-0.907208	0.0131862	0.796723
AT5G65350	-1.51133	-0.905765	0.0131862	0.796723
AT5G04630	1.51085	-0.875669	0.0131862	0.796723
AT5G02270	1.3463	-0.846909	0.0131862	0.796723
AT5G25060	-0.480004	2.45717	0.0133034	0.80108
AT1G08930	-0.447015	2.22155	0.013368	0.80108
AT3G23730	-0.856838	0.325759	0.0134251	0.80108
AT4G13495	1.88029	-1.33324	0.0135115	0.80108
AT3G14750	-1.64127	-1.29061	0.0135115	0.80108
AT3G05740	1.57943	-1.29223	0.0135115	0.80108
AT4G37090	0.753167	0.610516	0.0135487	0.80108
AT5G14840	0.371015	4.25387	0.0135591	0.80108
AT5G55460	0.520729	1.92995	0.0135723	0.80108
AT5G24620	0.408636	3.14724	0.0137181	0.807608
AT3G44610	-0.935647	0.249675	0.0140959	0.810706
AT3G28570	0.904773	0.266788	0.0140959	0.810706
AT2G37270	0.693638	1.07131	0.0140967	0.810706
AT5G52930	-2.41607	-1.6318	0.0141755	0.810706
AT3G09863	-2.41067	-1.63447	0.0141755	0.810706
AT4G35590	-2.12524	-1.47289	0.0142297	0.810706
AT3G51710	-2.12	-1.47601	0.0142297	0.810706
AT1G05420	-2.11998	-1.47844	0.0142297	0.810706
AT4G03960	2.0639	-1.47488	0.0142297	0.810706
AT3G59060	-2.02693	-1.52314	0.0142297	0.810706
AT3G53850	-1.74848	-1.42875	0.0142297	0.810706
AT1G58310	-1.74807	-1.42895	0.0142297	0.810706
AT1G73620	-1.74807	-1.42895	0.0142297	0.810706
AT5G52420	0.546585	1.82716	0.0142773	0.811406
AT5G56550	-1.37517	-0.748423	0.0144141	0.817155
AT5G09620	0.578106	1.48513	0.0144591	0.817688
AT3G14160	0.743469	0.609623	0.0146204	0.824777
AT1G15000	0.544443	1.93217	0.0147364	0.829283
AT3G18830	-0.431503	2.53889	0.0147865	0.830071
AT3G44690	-0.651293	1.04162	0.0149685	0.836518
AT1G22470	-0.691646	0.852587	0.0150248	0.836518
AT5G12870	-1.56549	-1.01377	0.0150768	0.836518
AT3G09400	-1.50805	-1.04452	0.0150768	0.836518
AT3G20060	-1.09657	-0.243867	0.0151564	0.836518
AT4G09580	-0.982275	-0.190501	0.0151564	0.836518
AT1G78410	-0.88954	-0.188509	0.0151564	0.836518
AT3G50930	-0.370465	4.01006	0.015309	0.842914
AT4G11010	0.621133	1.24333	0.0153962	0.845681
AT3G05350	-0.571191	1.55236	0.0154698	0.845681
ATCG00650	0.541893	1.54064	0.0154698	0.845681
AT5G15330	0.552796	1.64841	0.0155551	0.848327
AT4G27440	0.45631	2.70473	0.015781	0.858608
AT4G33950	0.808086	0.401814	0.0160308	0.868514
AT3G15210	-0.876922	0.022037	0.016117	0.868514
AT1G30220	-4.31356	-2.08601	0.0162932	0.868514
AT1G69325	-4.31356	-2.08601	0.0162932	0.868514
AT2G01430	-4.31188	-2.08683	0.0162932	0.868514
AT4G28350	-4.31103	-2.08725	0.0162932	0.868514
AT2G21650	4.28037	-2.08776	0.0162932	0.868514
AT5G03930	0.86293	0.198217	0.0163035	0.868514
AT4G32480	-0.843572	0.231311	0.0163035	0.868514
AT1G76790	-0.561687	1.51779	0.0163709	0.870081
AT5G21940	-0.489669	2.24316	0.0164297	0.871072
AT3G56070	0.536639	1.8475	0.0166314	0.871072
AT4G21380	-0.63461	1.09372	0.016686	0.871072
AT5G57900	0.755757	0.554766	0.0167076	0.871072
AT3G10720	-0.570918	1.75014	0.0167124	0.871072
AT2G46910	0.5342	1.74856	0.0167124	0.871072
AT1G17640	-1.26512	-0.813003	0.0167249	0.871072
AT1G06350	0.981374	-0.0403139	0.0167398	0.871072
ATCG01280	0.970909	-0.0991839	0.0167398	0.871072
AT1G76080	0.666674	1.00873	0.0168203	0.871072
AT1G27090	-0.643963	1.01249	0.0168203	0.871072
AT5G03380	-0.574107	0.961057	0.0169252	0.871072
AT5G64370	-0.888096	0.130238	0.0171335	0.871072
AT3G16390	-1.76276	-1.05626	0.0171483	0.871072
AT1G21710	-1.63594	-1.12507	0.0171483	0.871072
AT2G28610	-1.63201	-1.12274	0.0171483	0.871072
AT1G48195	1.58099	-1.11991	0.0171483	0.871072
AT2G40460	-1.49643	-1.05242	0.0171483	0.871072
AT2G14860	1.43311	-1.05439	0.0171483	0.871072
AT2G16580	-1.42453	-1.08795	0.0171483	0.871072
AT2G46870	1.02775	-0.180163	0.0172924	0.872599
AT4G16820	-0.989867	-0.182124	0.0172924	0.872599
AT3G10000	0.987922	-0.149704	0.0172924	0.872599
AT4G38230	0.3985	3.37781	0.0173477	0.87347
AT4G15530	-0.742117	0.400598	0.0174187	0.875129
AT2G38240	-1.34106	-0.664801	0.01763	0.882084
AT4G02630	-1.05463	-0.26951	0.0177311	0.882084
AT1G75230	0.613792	1.28543	0.0177444	0.882084
AT3G14650	0.347392	4.36866	0.017745	0.882084
AT2G26530	-0.737031	0.502367	0.0177492	0.882084
AT5G46690	-0.823444	0.227353	0.0179027	0.887786
AT3G45900	1.00842	0.0432942	0.0179662	0.887919
AT5G13200	-1.18463	-0.401668	0.0179954	0.887919
AT2G37975	0.543419	1.60305	0.0180538	0.887919
AT1G22050	0.684869	0.81196	0.0180987	0.887919
AT1G57750	0.604586	0.848572	0.0180987	0.887919
AT4G31910	-0.646381	1.16118	0.0182595	0.8939
AT3G60380	-0.531057	1.65764	0.0183592	0.896865
AT1G67340	-0.765454	0.341296	0.0184666	0.899841
AT3G14415	0.621183	1.10931	0.0184985	0.899841
AT1G79245	-0.3626	3.72743	0.0187041	0.907921
AT3G25250	-0.792026	-0.032036	0.0187827	0.909796
AT1G03550	0.340577	4.53881	0.0188601	0.909796
AT5G66450	0.778116	0.42653	0.0188616	0.909796
AT5G56350	-0.46539	2.21837	0.0189486	0.912073
AT5G20230	-0.720778	0.5305	0.0191184	0.91639
AT1G28260	-0.723429	0.75269	0.0192938	0.91639
AT5G01030	-0.683338	0.776203	0.0192938	0.91639
AT2G24010	1.74199	-1.20548	0.019338	0.91639
AT1G10340	-1.72278	-1.24548	0.019338	0.91639
AT1G03390	1.66304	-1.24513	0.019338	0.91639
AT3G01705	1.42052	-1.20586	0.019338	0.91639
AT1G24530	1.44573	-0.912024	0.0193975	0.91639
AT2G24390	1.3911	-0.937115	0.0193975	0.91639
AT3G63470	0.405914	3.05764	0.0195286	0.92007
AT2G32280	-0.951517	-0.1436	0.0195555	0.92007
AT1G30820	-0.387043	3.39758	0.0197134	0.925604
AT4G39160	-0.551791	1.48164	0.0199037	0.930892
AT5G42700	0.947268	0.101966	0.0199071	0.930892
AT3G02900	0.767067	0.379287	0.0200473	0.935541
AT1G76880	-0.46331	2.42884	0.0201623	0.937302
AT4G38470	-0.506675	1.76632	0.0201667	0.937302
AT3G07540	-0.602132	1.31798	0.0202622	0.939839
AT1G05960	-0.562341	1.45091	0.0203094	0.94013
AT1G67310	-0.483311	2.06229	0.0205755	0.943116
AT5G46330	0.771267	0.730323	0.0205874	0.943116
AT4G35570	0.731876	0.728567	0.0205874	0.943116
AT1G13230	-1.19121	-0.751114	0.0206204	0.943116
AT3G62100	-1.19011	-0.74981	0.0206204	0.943116
AT1G33590	-0.415912	2.60285	0.0206204	0.943116
AT4G28085	-0.850361	0.00225788	0.0209305	0.949185
AT2G18193	-0.426378	2.64047	0.0210098	0.949185
AT4G13510	-0.466811	2.04033	0.021045	0.949185
AT5G20225	0.378062	3.46176	0.0210472	0.949185
AT1G21310	-0.392619	3.17756	0.0211094	0.949185
AT1G78478	-1.27653	-0.60722	0.0211209	0.949185
AT1G61820	-1.20114	-0.47677	0.0211252	0.949185
AT3G53720	-1.10751	-0.455182	0.0211252	0.949185
AT5G62790	-1.06171	-0.477066	0.0211252	0.949185
AT4G40070	0.818653	0.29872	0.0213078	0.951128
AT1G27360	-0.813354	0.29816	0.0213078	0.951128
AT1G77670	-0.790136	0.286313	0.0213078	0.951128
AT1G10630	0.58914	1.16336	0.0213906	0.951128
AT2G14960	-1.632	-1.29572	0.0214998	0.951128
AT1G30260	1.57817	-1.29245	0.0214998	0.951128
AT2G25160	1.4954	-1.33273	0.0214998	0.951128
AT4G13690	1.48956	-1.33567	0.0214998	0.951128
AT1G61380	-0.795632	0.405915	0.0216871	0.955701
AT1G50310	-0.663268	0.817084	0.021742	0.955701
AT1G76680	-0.646263	0.802623	0.021742	0.955701
AT2G45685	0.323404	5.25823	0.0218564	0.955701
AT5G59670	-0.768791	0.751374	0.0218974	0.955701
AT1G55280	0.73093	0.734605	0.0218974	0.955701
AT5G47670	0.736619	0.480127	0.0219068	0.955701
AT3G16530	-0.78769	0.109365	0.0219362	0.955701
AT5G28420	0.673603	0.657874	0.0219886	0.956172
AT3G08000	0.597469	1.05944	0.0221055	0.957979
AT2G21050	-0.429033	2.67931	0.022192	0.957979
AT5G13340	-1.506	-1.04631	0.0224655	0.957979
AT5G26720	-1.38201	-0.981288	0.0224655	0.957979
AT3G12690	-1.38041	-0.979705	0.0224655	0.957979
AT3G05990	-1.31697	-1.01542	0.0224655	0.957979
AT4G15233	1.25921	-1.01247	0.0224655	0.957979
AT1G54040	-0.577998	1.29741	0.022495	0.957979
AT2G22760	-2.93648	-1.81412	0.0227397	0.957979
AT5G52400	-2.93565	-1.81453	0.0227397	0.957979
AT1G56670	-2.79921	-1.87167	0.0227397	0.957979
AT1G33760	-2.79806	-1.8744	0.0227397	0.957979
AT2G05620	-2.7968	-1.87502	0.0227397	0.957979
AT1G25460	2.74681	-1.8737	0.0227397	0.957979
AT2G44290	2.74421	-1.87458	0.0227397	0.957979
AT4G26500	-0.656119	0.914606	0.0227445	0.957979
AT2G46530	0.560642	1.48164	0.0228094	0.957979
AT3G56590	-1.00817	-0.17391	0.0229005	0.957979
AT5G66052	-0.983883	-0.186436	0.0229005	0.957979
AT5G58320	0.67127	0.831711	0.0230169	0.957979
AT1G34100	0.621665	1.06607	0.0232206	0.957979
AT5G17580	2.05824	-1.48026	0.0233245	0.957979
AT1G76620	-2.01686	-1.52353	0.0233245	0.957979
AT3G28880	-2.01531	-1.52888	0.0233245	0.957979
AT5G63710	-2.01408	-1.52706	0.0233245	0.957979
AT2G30460	-2.01284	-1.52767	0.0233245	0.957979
AT1G35255	1.95556	-1.52767	0.0233245	0.957979
AT5G64820	1.95325	-1.52632	0.0233245	0.957979
AT5G62100	-1.74478	-1.43058	0.0233245	0.957979
AT5G26731	-1.64174	-1.47849	0.0233245	0.957979
AT1G02920	-1.54159	-1.52325	0.0233245	0.957979
AT1G56242	-0.306126	4.69745	0.0233653	0.957979
AT3G13900	-0.480283	2.17486	0.0234968	0.960378
AT5G61340	-0.774618	0.607596	0.0235075	0.960378
AT5G45940	0.42171	2.70693	0.0238461	0.970397
AT2G36830	-0.484031	1.95184	0.0238636	0.970397
AT2G46160	-0.543902	1.53726	0.0239664	0.970397
AT3G50390	-1.29419	-0.901724	0.0241478	0.970397
AT3G12960	2.3487	-1.63508	0.0241756	0.970397
AT2G20540	-2.29415	-1.68667	0.0241756	0.970397
AT2G40113	-2.29041	-1.68608	0.0241756	0.970397
AT1G75770	2.23147	-1.692	0.0241756	0.970397
AT4G23690	2.22768	-1.69096	0.0241756	0.970397
AT5G59732	-0.305068	6.24441	0.0242167	0.970397
AT5G23860	-0.516361	1.59774	0.0242177	0.970397
AT4G08991	1.08784	-0.426297	0.0244527	0.976406
AT4G35480	-1.0187	-0.427014	0.0244527	0.976406
AT4G23500	0.536058	1.50869	0.0245537	0.976862
AT2G32030	-0.467929	2.0444	0.0246118	0.976862
AT1G18210	-0.707135	0.794578	0.0246274	0.976862
AT1G72070	-0.476694	2.22352	0.0246343	0.976862
AT3G03305	1.2319	-0.692068	0.0248376	0.980857
AT4G31615	-1.20927	-0.553594	0.0248632	0.980857
AT2G17030	-1.06194	-0.554172	0.0248632	0.980857
AT2G36070	0.571964	1.27834	0.0249863	0.984022
AT1G58270	0.43427	2.4724	0.0253844	0.997991
AT5G22850	-0.92533	0.0602376	0.0255215	1
AT1G22800	-0.647326	0.883468	0.0256651	1
AT1G64580	0.889309	-0.146608	0.0256889	1
AT5G57685	-0.526742	1.56162	0.0256928	1
AT2G38230	0.458674	1.98712	0.0258758	1
AT5G52640	1.57147	-1.12721	0.0259432	1
AT1G16916	-1.55997	-1.16412	0.0259432	1
AT4G28560	1.49288	-1.16323	0.0259432	1
AT2G45060	1.3619	-1.09031	0.0259432	1
AT3G47220	-1.3519	-1.12642	0.0259432	1
AT1G72060	0.366978	3.4299	0.0260606	1
AT1G27060	0.787413	0.18943	0.0262438	1
AT2G47800	-0.545674	1.52917	0.0263584	1
AT5G15780	-0.661328	0.736249	0.026381	1
AT1G01620	-0.442732	2.48463	0.026404	1
AT1G69570	-0.336702	4.1032	0.0265702	1
AT1G73890	0.354717	3.6417	0.0268152	1
AT4G23970	0.996577	-0.26834	0.0268864	1
AT1G18290	0.890034	-0.268404	0.0268864	1
AT5G11250	-0.724627	0.391721	0.026899	1
AT3G02340	-0.787893	0.476817	0.0269423	1
AT5G44780	0.723569	0.494249	0.0269423	1
AT4G35110	-0.723057	0.46741	0.0269423	1
AT1G08592	0.720332	0.497349	0.0269423	1
AT2G38780	-0.71747	0.496595	0.0269423	1
AT1G02860	0.86373	-0.0441136	0.0270459	1
AT5G07180	-0.450125	2.12851	0.027184	1
AT5G07440	-0.465989	2.07666	0.0272198	1
AT2G12450	0.434037	2.37612	0.0273048	1
AT2G07170	0.55221	1.37209	0.0274566	1
AT1G18100	0.349197	3.63264	0.0274582	1
AT4G18210	0.658666	0.769655	0.0279219	1
AT1G17420	-0.548299	1.12851	0.0279298	1
AT1G52890	1.03814	-0.377592	0.0279668	1
AT5G54730	-0.46617	1.93051	0.027993	1
AT3G01142	-0.348468	3.95357	0.0280786	1
AT5G10930	0.52103	1.55103	0.0282218	1
AT1G07490	-0.637307	0.684342	0.028293	1
AT1G54730	0.628399	0.687242	0.028293	1
AT2G17870	-0.625582	0.677307	0.028293	1
AT1G50575	1.38406	-0.945646	0.0283037	1
AT1G76500	-1.3812	-0.977707	0.0283037	1
AT3G53210	-1.28374	-0.914026	0.0283037	1
AT3G03780	-1.23	-0.942196	0.0283037	1
AT1G60525	-1.2253	-0.941897	0.0283037	1
AT2G42880	0.445586	2.18041	0.0284279	1
AT3G55430	-0.500113	1.38441	0.0285028	1
AT5G53660	0.449308	2.10183	0.0285706	1
AT3G46110	-0.943008	-0.138712	0.0286016	1
AT2G28605	0.896398	-0.139359	0.0286016	1
AT2G32240	-0.481288	1.81938	0.028727	1
AT4G02290	0.412824	2.57764	0.0287549	1
AT1G13110	-0.752366	0.300936	0.0288035	1
AT4G17490	-0.705622	0.280173	0.0288035	1
AT2G43510	-1.14996	-0.503262	0.0288335	1
AT5G43400	1.09958	-0.500816	0.0288335	1
AT1G74150	-1.01626	-0.503621	0.0288335	1
AT4G15420	-0.980627	-0.522647	0.0288335	1
AT1G79780	0.422757	2.35603	0.0291485	1
AT4G37900	-0.58093	1.01946	0.0292274	1
AT5G45850	-1.25963	-0.809146	0.0292742	1
AT3G54690	1.25926	-0.779349	0.0292742	1
AT5G10030	-1.20995	-0.835533	0.0292742	1
AT1G67510	-0.517248	1.61514	0.0293117	1
AT3G06590	0.402803	2.55324	0.0294268	1
AT1G10090	0.485666	1.74566	0.0295298	1
AT5G63180	-0.792481	0.0213208	0.0297552	1
AT3G27660	-1.71626	-1.24793	0.0297983	1
AT3G19553	-1.64128	-1.2882	0.0297983	1
AT3G06437	0.41712	2.33246	0.029883	1
AT3G50870	-0.652284	0.70173	0.0299703	1
AT1G14800	0.511464	1.56258	0.0301424	1
AT5G09380	0.952438	-0.224375	0.0301546	1
AT5G52970	-0.910767	-0.225105	0.0301546	1
AT1G13960	0.887004	-0.205864	0.0301546	1
AT1G29690	-0.789366	-0.186783	0.0301546	1
AT1G74540	0.344055	3.69024	0.0301644	1
AT2G25560	0.632518	0.628692	0.0303802	1
AT4G38650	0.368903	3.13206	0.0303995	1
AT3G01560	-0.529511	1.16965	0.0304269	1
AT1G76120	0.630389	0.879307	0.030503	1
AT1G60390	0.554113	1.03634	0.0306077	1
AT3G27720	0.691325	0.517234	0.0307068	1
AT5G66130	0.821434	0.226247	0.0308591	1
AT1G74370	-0.777199	0.239746	0.0308591	1
AT2G03780	-0.699563	0.341271	0.030988	1
AT1G24600	0.401117	2.65665	0.0310158	1
AT3G52100	-0.395992	2.98727	0.0313027	1
AT3G59110	-0.596895	0.967079	0.031333	1
AT2G39570	-0.459744	2.08948	0.0314931	1
AT1G27070	0.458373	2.05556	0.0316165	1
AT2G02870	-0.887726	-0.0694763	0.0316304	1
AT1G04150	-0.881753	-0.0706862	0.0316304	1
AT5G56910	0.831524	-0.0698838	0.0316304	1
AT4G36010	-0.458643	2.00343	0.0317322	1
AT2G28950	-0.451166	2.02652	0.0317322	1
AT4G20260	-0.62168	1.04006	0.0320143	1
AT4G33070	-0.598985	0.937149	0.0320532	1
AT5G15550	0.507065	1.60991	0.0321185	1
AT2G40240	0.482713	1.80036	0.0321395	1
ATMG00160	-4.10188	-2.1647	0.0322008	1
AT4G16230	4.07123	-2.16526	0.0322008	1
AT4G34400	-0.414611	2.64227	0.0322722	1
AT2G41130	-0.873413	0.0292992	0.0325601	1
AT1G31540	-0.774907	0.0579216	0.0325601	1
AT5G15970	-0.419202	2.32986	0.0325728	1
AT2G30870	-0.396386	2.46886	0.0329977	1
AT3G60310	1.08106	-0.432575	0.0330088	1
AT2G22270	-1.01098	-0.429044	0.0330088	1
AT3G13662	-0.696633	0.452727	0.0330142	1
AT1G33240	0.32903	4.11685	0.0330327	1
AT1G19790	0.734093	0.196843	0.0330742	1
AT5G02890	0.501074	1.67932	0.0331422	1
AT3G57040	1.42673	-1.05307	0.0331858	1
AT2G02498	-1.42519	-1.08549	0.0331858	1
AT1G67800	-1.2458	-1.04837	0.0331858	1
AT4G09310	-1.24403	-1.04951	0.0331858	1
AT4G30180	-1.24376	-1.04938	0.0331858	1
AT3G25780	-0.664607	0.745866	0.0334404	1
AT4G32300	-0.616657	0.759627	0.0334404	1
AT5G04470	-0.947407	-0.200945	0.033556	1
AT3G02840	1.6875	-1.42752	0.0338959	1
AT4G24460	1.68706	-1.42731	0.0338959	1
AT4G05631	1.68666	-1.42794	0.0338959	1
AT3G18510	1.68494	-1.42838	0.0338959	1
AT5G54190	1.48558	-1.33767	0.0338959	1
AT4G22920	1.48177	-1.33918	0.0338959	1
AT5G62920	1.39562	-1.37991	0.0338959	1
AT3G26440	1.39341	-1.38144	0.0338959	1
AT1G31950	0.409367	2.50787	0.0339733	1
ATCG00680	0.635006	0.665503	0.0340811	1
AT5G18210	1.24896	-0.582732	0.0340994	1
AT1G30730	-1.05585	-0.558544	0.0340994	1
AT2G25260	-1.01574	-0.580626	0.0340994	1
AT1G15760	0.959802	-0.579775	0.0340994	1
AT2G17770	-0.502231	1.68125	0.0341315	1
AT2G33540	-0.602239	0.997151	0.0343403	1
AT5G19140	0.413707	2.36041	0.0345494	1
AT4G26795	-0.329661	4.11742	0.0345547	1
AT5G05300	-1.34043	-0.874524	0.0345806	1
AT5G24010	1.22984	-0.905185	0.0345806	1
AT4G37030	-1.08708	-0.905486	0.0345806	1
AT3G54363	1.08692	-0.874324	0.0345806	1
AT2G34810	0.320979	3.89581	0.034638	1
AT1G70710	0.356602	3.11738	0.03469	1
AT4G21680	-1.06966	-0.720225	0.0347255	1
AT2G43130	-1.05815	-0.643979	0.0347255	1
AT3G23020	0.836383	-0.064609	0.0347667	1
AT3G12440	0.829142	-0.0193391	0.0347667	1
AT5G37490	-0.337963	3.56954	0.0348184	1
AT1G62240	0.450118	1.82262	0.0348453	1
AT2G46310	-0.567659	1.07994	0.0349039	1
AT3G16080	-0.562672	1.0804	0.0349039	1
AT4G12700	0.549034	1.09718	0.0349039	1
AT2G46510	-0.541649	1.4946	0.0351323	1
AT2G47730	-0.496829	1.69819	0.035133	1
AT4G04770	0.679648	0.506046	0.0351581	1
AT3G51450	-0.66188	0.786359	0.0352306	1
AT2G16400	0.397216	2.5939	0.035245	1
ATCG01010	0.410957	2.25177	0.0352791	1
AT3G57520	-0.315213	4.37579	0.0353564	1
AT4G14040	-0.797379	0.0745429	0.0354546	1
AT5G52910	0.790109	0.102366	0.0354546	1
AT5G51550	-0.418709	2.09613	0.0354667	1
AT3G43800	-0.94069	-0.271935	0.0354907	1
AT3G56540	0.908764	-0.25426	0.0354907	1
AT4G33560	-0.905371	-0.287351	0.0354907	1
AT1G76600	-0.697448	0.385592	0.0355359	1
AT1G07350	0.711668	0.227314	0.0357501	1
AT1G68050	-0.661595	0.287915	0.0357522	1
AT1G66200	-0.543292	1.02114	0.0358846	1
AT4G37790	0.633066	0.697348	0.0359921	1
AT2G41750	0.334378	3.58166	0.0361268	1
AT2G01130	-0.527201	1.418	0.0362318	1
AT2G23120	-0.394854	2.39761	0.0362901	1
AT5G13090	0.573637	1.10206	0.0363856	1
AT1G15520	0.295719	5.06175	0.0365821	1
AT5G54160	0.568293	1.16819	0.0367691	1
AT5G46910	-0.879982	-0.128754	0.0370794	1
AT4G25830	-0.851343	-0.146905	0.0370794	1
AT3G16420	-0.970643	-0.384564	0.0373673	1
AT3G13560	-0.929241	-0.404001	0.0373673	1
AT1G29270	0.909355	-0.385047	0.0373673	1
AT1G29810	0.875789	-0.402426	0.0373673	1
AT3G46620	-0.493032	1.04375	0.037455	1
AT4G32570	0.410443	2.27695	0.0374614	1
AT1G07520	-0.488201	1.49965	0.0374692	1
AT4G36900	-1.90349	-1.58121	0.0378757	1
AT5G28263	-1.90254	-1.57952	0.0378757	1
AT4G09432	1.84852	-1.57926	0.0378757	1
AT1G22740	-1.79466	-1.62725	0.0378757	1
AT5G24540	-1.63803	-1.48032	0.0378757	1
AT1G78080	-0.547739	1.11519	0.0378909	1
AT4G31540	-0.69477	0.4438	0.0378933	1
AT3G23550	-0.687179	0.445344	0.0378933	1
AT2G24830	0.603149	0.725663	0.0379412	1
AT2G38860	-0.884334	-0.011138	0.0380027	1
AT2G21060	-0.419322	2.20836	0.0380675	1
AT3G02650	0.561418	1.1988	0.0382134	1
AT1G30720	-0.685481	0.369358	0.0382936	1
AT1G13860	-0.774088	0.108545	0.0384324	1
AT5G05240	0.762495	0.13525	0.0384324	1
AT5G01720	-0.670321	0.246984	0.0384974	1
AT2G23330	0.657435	0.236718	0.0384974	1
AT3G06435	0.468878	1.5608	0.038593	1
AT1G26890	0.526185	1.39591	0.0386652	1
AT5G67350	0.513086	1.39866	0.0386652	1
AT1G69200	0.430613	2.14179	0.0386832	1
AT3G10370	-0.656399	0.621938	0.0387931	1
AT2G32430	1.4956	-1.16602	0.0388863	1
AT2G37950	-1.47234	-1.20632	0.0388863	1
AT2G34920	1.42296	-1.20131	0.0388863	1
AT4G29310	-0.62337	0.800215	0.0389146	1
AT5G45100	0.621762	0.807744	0.0389146	1
AT2G05520	-0.571736	1.03197	0.0390506	1
AT5G42765	1.04218	-0.527288	0.0390787	1
AT2G38810	-0.965095	-0.528284	0.0390787	1
AT5G01920	0.313799	3.87886	0.0393145	1
AT4G37110	1.01562	-0.249124	0.0394699	1
AT5G23100	-0.936413	-0.211043	0.0394699	1
AT1G65810	-0.902418	-0.228209	0.0394699	1
AT2G03130	-0.869138	-0.245397	0.0394699	1
AT3G45870	0.409779	2.10367	0.0398388	1
AT3G06500	-0.365366	2.90169	0.0398614	1
AT3G28560	0.519891	1.5067	0.0398655	1
AT3G58790	-0.6352	0.725683	0.0399271	1
AT5G63530	-0.46549	1.79208	0.040076	1
AT2G42490	0.358097	2.6426	0.0400933	1
AT1G05680	-0.421973	2.06976	0.0401736	1
AT4G22200	-0.763618	0.442278	0.0403027	1
AT1G08650	-0.708708	0.459944	0.0403027	1
AT2G39480	0.463683	1.75117	0.0403173	1
AT1G13580	1.11282	-0.665375	0.040454	1
AT4G32320	1.11204	-0.660061	0.040454	1
AT5G55830	1.06302	-0.685412	0.040454	1
AT4G28550	-1.0614	-0.635845	0.040454	1
AT3G10480	-0.399925	2.61365	0.040473	1
AT1G26560	0.851524	-0.106764	0.0407143	1
AT1G01480	-0.794142	-0.0740256	0.0407143	1
AT5G15460	0.77191	-0.0558231	0.0407143	1
AT3G54410	-2.79205	-1.87763	0.0407756	1
AT1G32080	-2.79163	-1.87784	0.0407756	1
AT1G66160	-2.63714	-1.94089	0.0407756	1
AT5G13470	-2.63461	-1.94213	0.0407756	1
AT3G45410	-2.63434	-1.942	0.0407756	1
AT3G47675	-2.63419	-1.94234	0.0407756	1
AT4G34800	-2.63124	-1.94379	0.0407756	1
AT2G19240	2.58278	-1.94105	0.0407756	1
ATMG00285	2.58252	-1.94119	0.0407756	1
AT3G49120	-0.583554	0.819053	0.0408059	1
AT4G30420	-2.28275	-1.6942	0.0408687	1
AT5G13230	2.22572	-1.69237	0.0408687	1
AT4G13180	-2.15846	-1.74918	0.0408687	1
AT2G27960	-2.15682	-1.74756	0.0408687	1
AT1G68610	2.10055	-1.74997	0.0408687	1
AT1G32450	2.09849	-1.75058	0.0408687	1
AT4G17380	0.730579	0.363911	0.0408936	1
AT4G20280	0.676961	0.364134	0.0408936	1
AT4G14230	-0.673993	0.367452	0.0408936	1
AT5G44630	-0.611559	0.672781	0.0409198	1
AT5G64120	-1.31658	-1.01086	0.0409373	1
AT4G18220	1.31653	-0.977042	0.0409373	1
AT2G44510	1.31617	-0.980121	0.0409373	1
AT1G56010	0.357783	2.78596	0.0411732	1
AT3G07400	0.411124	1.95252	0.041179	1
AT2G28140	1.20136	-0.81154	0.0412203	1
AT2G40600	-1.19935	-0.840286	0.0412203	1
AT2G26215	0.781729	0.242529	0.0413115	1
AT2G34670	-0.760701	0.241855	0.0413115	1
AT2G19800	-0.456913	1.73544	0.0413882	1
AT5G19850	0.446087	1.74935	0.0413882	1
AT4G12290	-0.618784	0.924201	0.0414736	1
AT4G18905	0.482359	1.71269	0.0416509	1
AT4G24240	-0.621337	0.590683	0.0418732	1
AT2G22426	-0.971905	-0.373682	0.0418882	1
AT5G03060	0.956022	-0.357473	0.0418882	1
AT5G53940	0.952047	-0.359533	0.0418882	1
AT4G01840	-0.936811	-0.395352	0.0418882	1
AT5G45470	0.280148	5.63675	0.0420001	1
AT1G13170	0.427979	2.04921	0.0423243	1
AT1G25380	-0.513531	1.3693	0.0426924	1
AT1G05470	-0.665268	0.496613	0.0427613	1
AT4G08520	-0.646023	0.484432	0.0427613	1
AT4G12420	-0.424456	2.04645	0.0432435	1
AT4G08685	0.564905	1.01719	0.0437122	1
AT5G26210	0.682909	0.615768	0.0441987	1
AT2G16780	0.447439	1.68133	0.044227	1
AT2G46220	-1.00869	-0.498075	0.0442501	1
AT4G12840	0.993872	-0.478004	0.0442501	1
AT2G05830	-0.936095	-0.475699	0.0442501	1
AT1G63260	-0.848585	-0.0368335	0.0444504	1
AT1G12220	0.829147	-0.068295	0.0444504	1
AT3G15080	0.804678	-0.0359526	0.0444504	1
AT4G02030	-0.723013	-0.0639072	0.0444504	1
AT1G14870	-0.700961	-0.0343189	0.0444504	1
AT2G42650	0.751144	0.174273	0.0446151	1
AT2G34650	-0.712357	0.163344	0.0446151	1
AT5G01260	-0.699171	0.187235	0.0446151	1
AT5G65660	-0.692366	0.187556	0.0446151	1
AT1G26665	-0.557211	0.873032	0.0446809	1
AT1G55080	0.827077	0.0883327	0.0447424	1
AT4G17540	0.595604	0.967857	0.0451622	1
AT1G53470	-0.681151	0.511461	0.0452662	1
AT5G09840	0.672206	0.512747	0.0452662	1
AT4G21850	-0.493283	1.45307	0.0453217	1
AT2G25790	-1.63417	-1.29198	0.0454647	1
AT4G27100	1.32862	-1.25088	0.0454647	1
AT2G46680	-1.21462	-1.33191	0.0454647	1
AT2G40200	1.15575	-1.33117	0.0454647	1
AT5G48380	-0.551386	1.05006	0.0454823	1
AT4G27180	0.396132	2.31992	0.0456285	1
AT1G68440	-0.515385	1.62509	0.0457638	1
AT3G49720	0.465323	1.64254	0.0457638	1
AT4G23610	0.435277	1.78855	0.045778	1
AT3G06870	-0.290085	4.90272	0.0459548	1
AT4G37260	-0.359848	2.78347	0.0462801	1
AT1G70300	-1.00923	-0.58178	0.0464159	1
AT1G14480	-0.917719	-0.630699	0.0464159	1
AT4G19520	-0.873014	-0.581745	0.0464159	1
AT1G22030	0.44174	1.8605	0.046442	1
AT1G61890	-0.434463	1.9482	0.0465498	1
AT3G58160	0.943869	-0.293746	0.046552	1
AT1G09400	0.361013	2.45989	0.0466731	1
AT1G26210	0.297459	4.18703	0.0469852	1
AT5G58600	0.737789	0.331214	0.0471228	1
AT3G50630	-0.556981	1.05932	0.0472758	1
AT3G51050	0.545488	1.08221	0.0472758	1
AT5G24830	0.444076	1.75482	0.0473577	1
AT1G71828	0.491526	1.12858	0.0473804	1
AT1G75090	-0.529617	1.20905	0.0473826	1
AT3G52530	0.450173	1.58374	0.0473864	1
AT5G24300	-0.572761	0.729613	0.0475228	1
AT5G53160	0.436435	1.88363	0.047537	1
AT2G40140	-0.330393	2.26932	0.0475373	1
AT4G39010	-0.901254	-0.165773	0.0477917	1
AT2G44745	0.82171	-0.180549	0.0477917	1
AT5G23210	-0.81306	-0.161797	0.0477917	1
AT2G15480	-0.789377	-0.180698	0.0477917	1
AT4G19865	0.773719	0.230272	0.0478087	1
AT1G08800	-1.18506	-0.74971	0.0481553	1
AT1G62150	-1.1845	-0.750243	0.0481553	1
AT3G58200	1.00857	-0.726496	0.0481553	1
AT5G17310	1.00649	-0.723502	0.0481553	1
AT5G11260	0.95663	-0.749924	0.0481553	1
AT4G27530	0.553043	0.812669	0.0482077	1
AT1G67850	-0.785435	0.0807203	0.0482315	1
AT4G21870	-0.740004	0.0948881	0.0482315	1
AT2G44980	0.69423	0.134533	0.0482315	1
AT1G74960	-0.514681	1.43786	0.0483974	1
AT4G16950	-0.459229	1.42332	0.0483974	1
AT4G19840	1.35811	-1.0885	0.0485589	1
AT1G31940	-1.17303	-1.08695	0.0485589	1
AT1G78995	-1.17139	-1.08776	0.0485589	1
AT5G50460	-1.17008	-1.08551	0.0485589	1
AT5G25440	-1.16626	-1.08765	0.0485589	1
AT5G56220	0.394903	2.41753	0.0485715	1
AT5G23235	-0.319637	3.4301	0.048581	1
AT2G22450	-0.500383	1.35003	0.0486645	1
AT1G59850	0.297938	4.17901	0.0489399	1
AT4G27740	-0.595664	0.620621	0.048967	1
AT5G51130	0.648904	0.455819	0.0490106	1
AT4G29520	0.617972	0.467875	0.0490106	1
AT2G26440	-0.540153	1.2162	0.049035	1
AT4G39600	1.22319	-0.907304	0.0490851	1
AT1G76170	1.163	-0.940788	0.0490851	1
AT2G17300	-1.07913	-0.910752	0.0490851	1
AT2G41410	-0.501693	1.0658	0.0490919	1
AT1G75960	0.312653	3.50893	0.0494099	1
AT4G39560	-0.888231	-0.428069	0.0495863	1
AT1G53180	-0.887091	-0.427897	0.0495863	1
AT1G80400	0.48409	1.42621	0.049862	1
AT5G07280	0.397434	2.11378	0.0498863	1
AT4G08874	0.439778	1.6056	0.0499958	1

## Sheet: Table2_MOCK_vs_DEX_diff_3h
Loci	logFC	logCPM	PValue	FDR
AT3G11980	-8.81004	1.32922	1.47743e-41	3.43368e-37
AT2G36792	-2.76139	2.76288	3.28584e-37	3.81831e-33
AT5G08640	-2.14152	2.88646	6.64435e-28	5.14738e-24
AT3G14900	1.56615	4.38704	9.94742e-26	5.7797e-22
AT4G11540	-7.79518	0.414594	3.37273e-22	1.56771e-18
AT5G13150	5.84473	0.106407	1.53165e-20	5.93283e-17
AT1G47980	-5.55873	0.200289	1.49709e-17	4.97054e-14
AT1G20790	7.31119	-0.180491	1.99835e-16	5.80545e-13
AT1G28700	-7.22481	-0.072165	2.97607e-15	7.6852e-12
AT1G76470	-6.99083	-0.264094	2.60206e-14	6.04745e-11
AT3G21560	1.53549	2.27697	9.27412e-14	1.95945e-10
AT4G30030	-7.04624	-0.219129	1.85676e-13	3.59609e-10
AT5G15845	-1.14712	3.37576	7.44451e-12	1.33091e-08
AT4G28652	1.39367	2.23521	2.247e-11	3.49963e-08
AT5G51580	-2.31569	0.780118	2.2587e-11	3.49963e-08
AT1G09570	1.14233	3.07418	4.71405e-11	6.84746e-08
AT2G01420	2.34505	0.534558	6.12608e-11	8.37508e-08
AT5G22260	-6.44997	-0.685777	3.08344e-10	3.98123e-07
AT1G16489	1.31698	2.11447	5.12e-10	6.26284e-07
AT1G12570	-3.18664	-0.0330603	6.40293e-10	7.37894e-07
AT4G14810	-3.38182	-0.131469	6.66743e-10	7.37894e-07
AT2G42920	-1.39049	1.90961	8.63847e-10	9.12576e-07
AT1G68620	1.99963	0.761714	1.01184e-09	1.02244e-06
AT3G60960	1.33955	1.91772	1.57032e-09	1.52066e-06
AT5G28360	2.77287	-0.00220177	2.22748e-09	2.07075e-06
AT3G13220	-6.27592	-0.814022	3.98472e-09	3.56188e-06
AT4G28570	-1.72897	1.07903	5.37445e-09	4.48155e-06
AT2G03210	-3.9395	-0.433226	5.39922e-09	4.48155e-06
AT3G24332	1.43837	1.41412	8.81524e-09	7.06465e-06
AT3G61490	1.59439	1.14149	9.65099e-09	7.47662e-06
AT4G19460	-4.55848	-0.59669	1.42501e-08	1.06834e-05
AT1G68460	-1.11575	2.53823	1.70813e-08	1.24059e-05
AT1G70940	1.46953	1.34133	2.27939e-08	1.60531e-05
AT4G27190	1.48612	1.29981	2.47394e-08	1.69108e-05
AT2G34020	2.71075	-0.184171	3.18385e-08	2.11417e-05
AT3G26820	-6.07825	-0.954803	5.28094e-08	3.40929e-05
AT4G22080	-6.02507	-0.991854	1.01164e-07	6.02862e-05
AT5G44220	-6.02507	-0.991854	1.01164e-07	6.02862e-05
AT1G24230	-6.02474	-0.992035	1.01164e-07	6.02862e-05
AT1G69500	-4.25972	-0.813847	1.11985e-07	6.50663e-05
AT1G17232	0.726052	4.50132	4.44514e-07	0.000251974
AT4G28395	-4.10958	-0.917812	7.07949e-07	0.000391749
AT3G61510	2.33661	-0.188184	8.4552e-07	0.000456993
AT1G69572	-0.8352	3.1388	1.00495e-06	0.000530819
AT1G72610	0.707451	4.3121	1.25186e-06	0.000646544
AT4G31610	0.866136	2.84174	1.41689e-06	0.000715868
AT1G75490	1.11592	1.65555	2.4614e-06	0.00121714
AT3G13210	-2.82697	-0.539522	2.94254e-06	0.00142474
AT1G23080	1.07405	1.74666	3.28266e-06	0.00155698
AT1G02813	-5.65164	-1.23957	5.17367e-06	0.00240483
AT1G76892	-0.926252	2.23984	6.22168e-06	0.00283526
AT3G15400	-2.28809	-0.309447	7.7585e-06	0.0034676
AT5G57250	1.13418	1.35726	1.02105e-05	0.00447739
AT2G23940	-1.56123	0.499865	1.16488e-05	0.00501351
AT1G72970	0.794479	2.71091	1.38906e-05	0.00586965
AT3G60957	1.39731	0.665124	1.88684e-05	0.00783073
AT2G22560	0.921295	1.84311	2.0394e-05	0.0083154
AT5G54510	-1.50797	0.522012	2.10175e-05	0.00842184
AT1G01280	-3.30603	-0.881703	2.38378e-05	0.00939009
AT3G57620	-3.75151	-1.15204	2.84672e-05	0.010846
AT2G03200	-3.75035	-1.15186	2.84672e-05	0.010846
AT1G32880	-1.75716	0.0431147	4.28733e-05	0.0160713
AT4G00870	-0.760274	2.70006	4.73532e-05	0.0174688
AT2G27035	2.83484	-1.10083	5.03421e-05	0.0182812
AT4G15160	1.26041	0.691751	5.19908e-05	0.0185895
AT4G39790	1.64026	0.0537978	5.90591e-05	0.0207969
AT3G03140	-0.944475	1.7287	6.07466e-05	0.0210718
AT3G42960	-2.56494	-0.714931	6.27311e-05	0.0214402
AT5G51400	-1.11625	1.13349	6.42677e-05	0.021647
AT5G03350	0.972704	1.51414	7.13428e-05	0.0225351
AT1G53440	0.601283	3.95398	7.23841e-05	0.0225351
AT2G31751	0.594945	4.06716	7.32835e-05	0.0225351
AT1G78710	-5.33603	-1.43194	7.36917e-05	0.0225351
AT1G64035	-5.24542	-1.48416	7.36917e-05	0.0225351
AT2G31850	-5.24542	-1.48416	7.36917e-05	0.0225351
AT5G66110	-5.24542	-1.48416	7.36917e-05	0.0225351
AT1G44970	2.03954	-0.49987	7.73432e-05	0.0233446
AT1G71528	-0.977092	1.5513	7.93253e-05	0.0236359
AT4G27440	0.684454	2.99449	8.34736e-05	0.0245571
AT4G23440	0.817459	2.11937	8.6241e-05	0.024774
AT4G30470	-1.2984	0.53999	8.63427e-05	0.024774
AT3G23370	-0.814798	2.1785	9.8284e-05	0.0278563
AT5G27650	-1.16343	0.924196	0.000117355	0.0328609
AT1G54400	-2.67933	-0.920309	0.000123465	0.0341602
AT1G72070	-0.738248	2.41025	0.000142203	0.038406
AT4G21600	5.28724	-1.58886	0.000143768	0.038406
AT4G14080	-5.14838	-1.53854	0.000143768	0.038406
AT3G47500	-1.12838	0.862811	0.000146416	0.0386687
AT3G24518	0.630097	3.29656	0.000156883	0.0408323
AT1G75540	1.43518	0.229114	0.000158893	0.0408323
AT2G42835	-0.963589	1.43866	0.000161187	0.0408323
AT1G60545	-0.506992	5.46402	0.000161636	0.0408323
AT5G47435	-0.78585	2.13621	0.000182198	0.0455318
AT3G46658	-1.9218	-0.408578	0.000187159	0.0462742
AT2G36570	0.782255	2.10152	0.000198177	0.0479861
AT3G16340	-0.820853	1.91786	0.000198213	0.0479861
AT3G23840	-1.60637	-0.152656	0.000228695	0.054795
AT5G47630	-1.66294	-0.21912	0.000245373	0.0570769
AT1G72960	1.62116	-0.255109	0.000245373	0.0570769
AT1G58270	0.722709	2.37005	0.000245587	0.0570769
AT5G06490	-5.14805	-1.53872	0.000280965	0.0640186
AT1G55410	-5.14634	-1.53964	0.000280965	0.0640186
AT2G31210	1.89886	-0.58438	0.000296189	0.0668323
AT4G25640	0.865282	1.55474	0.000310019	0.0692804
AT2G34320	-1.60005	-0.155988	0.000336681	0.0745218
AT5G06510	-2.49811	-1.03226	0.000364749	0.0799728
AT1G07485	-0.668039	2.60396	0.000370134	0.0803951
AT2G35570	-1.01573	1.13112	0.000385709	0.0830024
AT2G31480	-2.62444	-0.953345	0.000422113	0.0894335
AT1G14360	0.698045	2.28268	0.00042329	0.0894335
AT2G34500	0.728777	2.1301	0.000455541	0.0946694
AT1G75780	-2.11244	-0.783062	0.000456219	0.0946694
AT4G25760	1.26139	0.275104	0.00046697	0.0951902
AT4G13540	0.709817	2.25533	0.000470737	0.0951902
AT1G20150	-2.16668	-0.746909	0.000471015	0.0951902
AT4G14130	0.857134	1.42813	0.000478112	0.0953416
AT5G37490	-1.45015	0.166271	0.000479969	0.0953416
AT4G39920	-1.15776	0.687251	0.000520536	0.102523
AT1G55560	-4.93233	-1.65388	0.000550032	0.105647
AT2G25770	-4.93233	-1.65388	0.000550032	0.105647
AT5G38393	-4.93233	-1.65388	0.000550032	0.105647
AT2G28680	-3.36671	-1.38121	0.000611516	0.116494
AT1G07490	-1.02478	0.903523	0.000697489	0.131791
AT5G56230	1.83859	-0.619251	0.000711128	0.133285
AT5G53050	-0.74906	1.87423	0.000722258	0.134288
AT2G45685	0.465352	4.99462	0.000729514	0.134561
AT5G06530	-2.1632	-0.750493	0.000751457	0.137517
AT2G31902	-1.1032	0.65053	0.000770057	0.139819
AT1G28685	0.458865	5.13823	0.000778222	0.140207
AT3G50480	-0.990405	0.916444	0.000784892	0.140321
AT4G35190	0.723594	1.99524	0.000812639	0.143621
AT4G34480	-1.29822	0.198831	0.000815713	0.143621
AT1G09575	1.7061	-0.477811	0.000947701	0.165553
AT5G52190	-0.681048	2.17309	0.000954522	0.165553
AT5G07280	0.662643	2.27123	0.000969594	0.165869
AT4G37895	0.483333	4.24156	0.000970618	0.165869
AT3G13510	0.530058	3.44786	0.00100962	0.171274
AT2G36800	-1.19253	0.374419	0.00107817	0.17654
AT1G76250	-4.93165	-1.65425	0.00107864	0.17654
AT1G75530	4.91394	-1.77667	0.00107864	0.17654
AT2G34555	-4.81087	-1.71522	0.00107864	0.17654
AT4G34332	-4.81087	-1.71522	0.00107864	0.17654
AT4G14780	-3.27576	-1.43177	0.00112484	0.182814
AT4G22250	-1.54944	-0.290186	0.00116517	0.188054
AT3G28915	-1.48698	-0.131953	0.00120651	0.193383
AT5G53160	0.675756	2.0692	0.00125342	0.199525
AT3G10985	0.662737	2.18976	0.00132346	0.209241
AT2G31160	-0.974004	0.873778	0.0014248	0.223742
AT3G59360	-1.2965	0.0615697	0.00144721	0.225735
AT2G32290	-1.13872	0.441615	0.00146722	0.227331
AT1G08592	1.09946	0.482273	0.0014832	0.228284
AT2G15730	1.34429	-0.124328	0.0015159	0.231783
AT2G40200	-2.6467	-1.28567	0.00154799	0.233694
AT5G04190	-1.70933	-0.539099	0.00154851	0.233694
AT4G25750	0.956642	0.858923	0.00158591	0.237794
AT4G16267	0.589429	2.49559	0.00162284	0.241772
AT4G36750	-0.685927	1.95162	0.0016468	0.243779
AT3G08890	1.04522	0.487446	0.00169966	0.250011
AT1G02050	-0.708329	1.80004	0.00179122	0.261822
AT5G45850	-1.56809	-0.385115	0.00189842	0.275757
AT3G20810	0.751426	1.48672	0.00191391	0.27628
AT1G05680	-2.18352	-0.954747	0.00193587	0.277725
AT4G36250	0.713077	1.654	0.00197981	0.282287
AT2G23140	-0.882216	1.15506	0.00206009	0.285604
AT3G03520	-3.17601	-1.48564	0.00206452	0.285604
AT4G26830	-3.07506	-1.53836	0.00206452	0.285604
AT1G07330	-3.07419	-1.53798	0.00206452	0.285604
AT3G50580	-3.07419	-1.53798	0.00206452	0.285604
AT5G25610	0.580676	2.57385	0.00209285	0.287811
AT3G10340	-4.67828	-1.77928	0.00211894	0.28799
AT3G50570	-4.67828	-1.77928	0.00211894	0.28799
AT5G03670	-1.1549	0.233207	0.00215429	0.290999
AT5G25460	0.576856	2.5781	0.00216612	0.290999
AT5G65730	-0.759278	1.43228	0.00247412	0.330466
AT5G42900	0.608652	2.28637	0.00251587	0.334122
AT1G23050	0.561141	2.65766	0.00262635	0.346813
AT5G63090	-0.880039	0.942727	0.00266932	0.350496
AT4G29020	-2.56132	-1.33365	0.00270891	0.351136
AT2G40460	-2.56044	-1.33327	0.00270891	0.351136
AT3G21420	-1.23451	0.0245706	0.00274495	0.351136
AT1G64080	-0.763559	1.41284	0.00276192	0.351136
AT2G03460	-1.46359	-0.241306	0.00276485	0.351136
AT4G20860	1.31343	-0.279437	0.00276485	0.351136
AT1G61120	-1.18643	0.130046	0.00283696	0.358336
AT5G15220	1.11736	0.191931	0.00289356	0.363509
AT1G16630	-0.730164	1.55649	0.00293525	0.366764
AT2G44290	2.14042	-1.23438	0.00304202	0.376061
AT5G53750	2.1372	-1.23587	0.00304202	0.376061
AT1G69160	-1.26048	-0.0317493	0.00315149	0.387534
AT3G03470	-1.0023	0.398202	0.00333893	0.408421
AT1G18000	0.417466	4.49272	0.00346219	0.419936
AT2G19580	-1.62011	-0.598784	0.00348727	0.419936
AT1G62940	-1.57315	-0.622181	0.00348727	0.419936
AT4G36260	0.40138	5.02296	0.00351508	0.421103
AT2G16365	0.570016	2.38814	0.00363725	0.433505
AT1G75100	-0.698401	1.64985	0.00374061	0.441297
AT1G29980	0.68219	1.63405	0.00374061	0.441297
AT4G09820	3.26525	-1.64785	0.00377884	0.442271
AT4G36930	0.595094	2.13702	0.00378692	0.442271
AT1G11580	-1.42563	-0.264798	0.00392015	0.455541
AT1G17745	-0.638314	1.96731	0.00400753	0.463378
AT1G21590	0.896411	0.767393	0.00406671	0.465923
AT4G19180	-1.22005	-0.135119	0.00416706	0.465923
AT5G42323	-4.53231	-1.84632	0.00416987	0.465923
AT5G62320	-4.53231	-1.84632	0.00416987	0.465923
AT5G02000	-4.53196	-1.84651	0.00416987	0.465923
AT4G20050	-4.53161	-1.84669	0.00416987	0.465923
AT1G33730	-4.53161	-1.8467	0.00416987	0.465923
AT5G56950	0.620977	1.92588	0.00419582	0.466579
AT1G13260	0.78155	1.08233	0.00423237	0.468402
AT1G70710	0.469616	3.35389	0.00430058	0.473668
AT5G44210	1.1929	-0.0852302	0.00433134	0.473668
AT3G12410	-1.0291	0.372508	0.00436147	0.473668
AT2G33310	1.01037	0.352666	0.00436147	0.473668
AT3G24880	0.650447	1.70364	0.00439881	0.475501
AT1G51130	1.16581	0.0154648	0.00442733	0.476368
AT5G20120	1.10917	0.0906135	0.00446798	0.478527
AT3G10820	-1.47216	-0.334176	0.00449078	0.478762
AT1G50270	-0.620595	1.92739	0.00459527	0.484531
AT4G31240	-1.94437	-0.883065	0.00462828	0.484531
AT5G33382	-1.88421	-0.918495	0.00462828	0.484531
AT1G24530	1.77325	-0.913043	0.00462828	0.484531
AT4G18680	2.72332	-1.47819	0.00471812	0.489526
AT3G21080	-2.47037	-1.3825	0.00471812	0.489526
AT4G16670	-0.41045	4.35597	0.00480083	0.495894
AT4G39210	0.828895	0.812826	0.00487641	0.501471
AT4G18190	-2.6482	-1.284	0.00510529	0.519381
AT1G64440	-1.20392	0.00319215	0.00511761	0.519381
AT5G65290	-1.1727	-0.0127134	0.00511761	0.519381
AT1G51355	-1.35147	-0.408604	0.00514309	0.519698
AT5G22020	-0.804298	0.928543	0.00551179	0.554543
AT3G22370	-1.28188	-0.174014	0.00578172	0.576467
AT1G06360	-1.04755	0.280389	0.00580677	0.576467
AT5G27220	0.992865	0.259347	0.00580677	0.576467
AT3G59260	-1.6513	-0.71868	0.00582891	0.576467
AT4G00760	0.660766	1.5661	0.00594492	0.585449
AT3G28370	1.13236	-0.00496948	0.00598169	0.586584
AT1G71880	0.614393	1.82727	0.00609215	0.594906
AT4G31250	0.51438	2.61901	0.00644568	0.626795
AT2G31910	-1.45517	-0.570246	0.00672727	0.645031
AT2G44670	-1.45272	-0.567552	0.00672727	0.645031
AT4G04430	1.45244	-0.620797	0.00672727	0.645031
AT3G18773	-0.410519	4.02861	0.00676771	0.645031
AT1G31485	-0.519699	2.48869	0.00677198	0.645031
AT5G46160	1.15283	-0.167335	0.00687077	0.64559
AT3G26080	-2.96028	-1.59635	0.0068933	0.64559
AT4G16750	-2.95952	-1.59671	0.0068933	0.64559
AT1G07340	-2.84155	-1.65371	0.0068933	0.64559
AT1G74170	-1.10119	0.078959	0.00692392	0.64559
AT1G61600	-0.411567	3.96278	0.00694457	0.64559
AT1G02800	0.666103	1.42134	0.0069723	0.64559
AT5G15581	0.379559	4.67993	0.00709009	0.653892
AT3G50660	-0.812509	0.874545	0.00712888	0.654871
AT1G55110	-0.749114	1.12209	0.00716418	0.655522
AT5G16505	-0.782264	0.946081	0.00730834	0.665088
AT4G16270	0.683702	1.27224	0.00733482	0.665088
AT5G65140	-1.31145	-0.434929	0.00735457	0.665088
AT4G36032	-0.490689	2.84505	0.00742055	0.668454
AT1G32415	-1.52221	-0.654676	0.00767226	0.685054
AT1G22470	-0.731018	1.19325	0.00771212	0.685054
AT4G00820	-0.723042	1.25546	0.00775294	0.685054
AT1G75000	0.696824	1.21994	0.00775294	0.685054
AT5G07760	1.76631	-1.06432	0.00781525	0.685054
AT5G58640	0.613047	1.64069	0.00796083	0.685054
AT5G62530	-0.545454	2.23387	0.00800816	0.685054
AT5G48410	-1.11843	0.0242611	0.00804415	0.685054
AT1G08230	-0.728039	1.15615	0.00815575	0.685054
AT2G22500	-2.37327	-1.43304	0.0081724	0.685054
AT5G26730	-2.27151	-1.48342	0.0081724	0.685054
AT2G29450	0.936926	0.351161	0.00821536	0.685054
AT2G15042	-0.920995	0.397232	0.00821536	0.685054
AT1G79910	-4.53092	-1.84707	0.00822033	0.685054
AT3G13782	-4.53058	-1.84725	0.00822033	0.685054
AT2G42480	-4.36994	-1.91664	0.00822033	0.685054
AT5G22160	-4.36959	-1.91683	0.00822033	0.685054
AT1G12010	-4.36958	-1.91683	0.00822033	0.685054
AT1G79860	-4.36958	-1.91683	0.00822033	0.685054
AT5G60480	-4.36855	-1.91739	0.00822033	0.685054
AT3G19840	-0.690857	1.37159	0.00822383	0.685054
AT3G10680	1.84603	-1.18965	0.00831017	0.687319
AT1G54930	-1.83747	-1.15311	0.00831017	0.687319
AT2G39805	0.763865	0.956343	0.00844733	0.694255
AT1G09750	-0.644843	1.58341	0.00847609	0.694255
AT4G39070	1.38671	-0.561981	0.00848387	0.694255
AT2G43920	-2.04763	-1.28671	0.00851352	0.694255
AT1G29910	-0.716053	1.233	0.00870654	0.707513
AT5G08620	0.593621	1.8025	0.00878522	0.710138
AT1G02640	0.485952	2.64319	0.00879996	0.710138
AT1G50310	-0.843627	0.722442	0.00902624	0.721417
AT3G49550	0.824356	0.695683	0.00902624	0.721417
AT4G24210	-0.653883	1.50877	0.00903285	0.721417
AT4G11990	-0.856291	0.576981	0.009167	0.72937
AT1G77030	-0.45484	3.04433	0.00919519	0.72937
AT5G01820	-0.768421	0.876608	0.009448	0.746874
AT3G22570	-0.692567	1.26292	0.00977144	0.768291
AT1G24560	0.686055	1.17929	0.00978504	0.768291
AT4G22235	-1.6947	-0.847119	0.00986217	0.771739
AT1G49360	-0.983738	0.183408	0.0102169	0.796818
AT1G13250	0.559532	1.92776	0.0103442	0.799092
AT1G17730	1.32991	-0.505399	0.0104533	0.799092
AT2G46870	1.32639	-0.506717	0.0104533	0.799092
AT1G02270	-1.30915	-0.434525	0.0104533	0.799092
AT5G46560	-1.26786	-0.459783	0.0104533	0.799092
AT4G35630	-0.560431	1.90442	0.010514	0.799092
AT3G59060	-1.03439	0.0968563	0.0105212	0.799092
AT4G05040	-1.03115	0.0959365	0.0105212	0.799092
AT2G25840	0.818006	0.60134	0.0109172	0.82212
AT5G01215	0.334252	5.95769	0.0109328	0.82212
AT5G20050	-1.21041	-0.219003	0.0109556	0.82212
AT2G25870	0.675457	1.212	0.0109658	0.82212
AT1G19835	0.680084	1.15391	0.0110057	0.822453
AT1G68540	-1.75642	-0.992348	0.0110673	0.822482
AT2G39330	-0.417019	3.27829	0.0110768	0.822482
AT1G24610	-0.811531	0.704159	0.0111989	0.828894
AT2G40270	-1.46716	-0.687424	0.0112687	0.831416
AT5G25150	0.744901	0.844903	0.0115547	0.849324
AT4G11820	-0.652293	1.25625	0.0115845	0.849324
AT2G07835	0.894891	0.366958	0.0116576	0.850738
AT1G73920	-0.708008	1.06893	0.0117126	0.850738
AT3G13900	-0.613171	1.48096	0.0117136	0.850738
AT2G46572	-0.431456	3.11454	0.0120982	0.875931
AT5G54190	1.33871	-0.589056	0.0121502	0.876963
AT2G24990	0.614746	1.47547	0.0122697	0.877678
AT3G13400	-1.91287	-1.11118	0.0122734	0.877678
AT1G34360	1.68514	-1.10567	0.0122734	0.877678
AT2G45160	-0.473295	2.61425	0.012481	0.88457
AT5G03377	2.98183	-1.77549	0.012522	0.88457
AT2G43610	-2.83814	-1.65554	0.012522	0.88457
AT3G18010	-2.70827	-1.71541	0.012522	0.88457
AT2G04039	-1.18958	-0.409188	0.0126281	0.886677
AT5G15120	-1.18887	-0.408845	0.0126281	0.886677
AT1G45229	-1.14656	-0.176234	0.0127661	0.893667
AT2G46520	0.512743	2.17909	0.0130518	0.910922
AT1G05575	-1.7567	-1.19614	0.0133584	0.926751
AT5G22460	1.75264	-1.23535	0.0133584	0.926751
AT1G18010	0.354731	4.41581	0.0137075	0.948141
AT1G55360	0.444871	2.78836	0.013811	0.951034
AT4G02130	-0.518012	2.20486	0.0138311	0.951034
AT5G20710	-2.27068	-1.48472	0.0140648	0.951833
AT5G61610	-2.2696	-1.48525	0.0140648	0.951833
AT4G00050	-2.26802	-1.48525	0.0140648	0.951833
AT2G32530	-1.95662	-1.33328	0.0140944	0.951833
AT5G62630	-1.95653	-1.33323	0.0140944	0.951833
AT4G27520	-0.688347	1.00248	0.0141013	0.951833
AT5G35410	-1.35621	-0.62642	0.0141294	0.951833
AT5G52280	-0.501699	2.21836	0.0142303	0.955859
AT5G24750	1.0208	-0.0645628	0.0143339	0.958856
AT4G17480	0.47192	2.43768	0.0143575	0.958856
ATCG00090	1.17108	-0.507772	0.0147621	0.982971
AT5G40060	-1.63524	-0.883602	0.0148454	0.982971
AT3G59870	-1.42576	-0.849661	0.0148454	0.982971
AT3G28560	0.635809	1.31908	0.0149575	0.98535
AT2G36790	-0.745177	0.934902	0.0150344	0.98535
AT1G66200	-0.689561	0.946668	0.0150344	0.98535
AT3G55160	0.715204	0.854084	0.015051	0.98535
AT1G68190	0.897186	0.288583	0.0156597	1
AT5G38120	-0.514176	2.0303	0.0157727	1
AT3G06870	-0.335075	4.88807	0.015849	1
AT5G51800	0.77044	0.639226	0.0158768	1
AT2G44140	-0.348149	4.33616	0.0160005	1
AT1G09340	-0.76632	0.746349	0.0160053	1
AT3G58630	0.75978	0.721402	0.0160053	1
AT4G12290	-0.749145	0.736726	0.0160053	1
AT3G07390	0.379425	3.60755	0.0160668	1
AT1G21945	-0.983925	0.00731049	0.0162074	1
AT1G28100	0.336756	4.74771	0.0162202	1
AT1G20132	-4.18701	-1.99058	0.016234	1
AT1G59690	-4.18701	-1.99058	0.016234	1
AT2G32460	-4.18701	-1.99058	0.016234	1
AT5G03435	-4.18701	-1.99058	0.016234	1
AT5G13380	-4.18701	-1.99058	0.016234	1
AT5G22170	-4.18701	-1.99058	0.016234	1
AT2G42140	-4.18665	-1.99076	0.016234	1
AT5G25320	-4.18632	-1.99094	0.016234	1
AT5G48490	-4.18596	-1.99114	0.016234	1
AT1G16160	-4.18527	-1.99151	0.016234	1
AT1G02920	-4.18525	-1.99152	0.016234	1
AT1G21310	-0.381848	3.52676	0.016324	1
AT2G40360	0.393431	3.35374	0.0163296	1
AT2G36890	-1.41596	-0.717004	0.0164323	1
AT4G15150	-1.41532	-0.718977	0.0164323	1
AT1G77740	0.497058	2.18282	0.0166377	1
AT2G46560	0.482626	2.25625	0.0167581	1
AT1G03060	0.440767	2.69127	0.0168983	1
AT4G17250	-1.68829	-1.02932	0.0169203	1
AT3G24360	-1.68502	-1.03113	0.0169203	1
AT2G25605	1.5562	-1.02619	0.0169203	1
AT1G76185	1.55463	-1.0269	0.0169203	1
AT1G76160	-0.51102	2.0514	0.0172722	1
AT2G18550	-1.2604	-0.569175	0.0172823	1
AT4G13990	-1.25861	-0.569361	0.0172823	1
AT2G15840	-0.962162	0.119391	0.0173508	1
AT5G47060	-1.19923	-0.310723	0.0175566	1
AT3G59700	-1.16475	-0.332123	0.0175566	1
AT3G11240	1.09652	-0.327857	0.0175566	1
AT3G16330	-1.26578	-0.458565	0.0176042	1
AT2G04620	-1.14563	-0.434697	0.0176042	1
AT3G20100	-0.84045	0.444557	0.017694	1
AT3G25550	-0.662882	1.0699	0.0177494	1
AT2G47460	-0.60709	1.27082	0.0178415	1
AT4G30200	-0.601831	1.39857	0.0179845	1
AT1G54340	-0.641745	1.20758	0.0181508	1
AT5G45770	-0.583575	1.56611	0.0183207	1
AT4G36360	0.437691	2.68634	0.0183375	1
AT1G72060	0.380171	3.48831	0.0184865	1
AT1G33360	-0.624111	1.28692	0.0187037	1
AT5G46330	0.83817	0.335034	0.0188043	1
AT3G27325	0.837466	0.335313	0.0188043	1
AT2G37362	0.678454	0.860503	0.019392	1
AT1G47340	-0.710674	0.813586	0.019525	1
AT2G16430	0.708047	0.800128	0.019525	1
AT4G00900	-0.614103	1.30393	0.019586	1
AT2G47790	0.600136	1.28284	0.019586	1
AT5G04470	-1.05573	-0.153848	0.019704	1
AT3G15610	0.460624	2.37685	0.0199488	1
AT3G16280	-0.880612	0.28214	0.0199716	1
AT2G28605	-1.30418	-0.656997	0.0202598	1
AT5G19480	-0.577492	1.44012	0.0204398	1
AT1G31190	-0.841526	0.400261	0.0204757	1
AT3G62810	0.82356	0.364179	0.0204757	1
AT5G50790	-1.18561	-0.407405	0.0206609	1
AT3G23150	1.08715	-0.401811	0.0206609	1
AT4G36120	1.22551	-0.561464	0.0207049	1
AT3G07215	-1.17843	-0.514053	0.0207049	1
AT5G43870	-1.17404	-0.513076	0.0207049	1
AT1G14590	1.11984	-0.534944	0.0207049	1
ATCG00170	-0.859815	0.214708	0.0211898	1
AT5G52390	-2.04854	-1.28547	0.0212944	1
AT5G44260	1.65667	-1.28078	0.0212944	1
AT5G16810	1.65388	-1.28241	0.0212944	1
AT2G22905	-0.98167	0.00527833	0.0213012	1
AT1G61667	-0.954409	-0.0126704	0.0213012	1
AT5G54650	-0.95026	-0.0117435	0.0213012	1
AT5G62640	-0.502077	1.95571	0.0215163	1
AT1G19210	0.482456	2.07607	0.0216155	1
AT3G60900	-0.697304	0.926752	0.0217823	1
AT3G22600	-0.849684	0.313215	0.0218173	1
AT4G01880	0.826439	0.290317	0.0218173	1
AT4G36010	-0.535944	1.77678	0.0218345	1
AT3G11070	0.671568	0.833149	0.0220544	1
AT1G29357	-1.5734	-0.918467	0.0221664	1
AT5G27610	1.37574	-0.986652	0.0221664	1
AT3G24730	0.972602	-0.146363	0.0222901	1
AT1G58360	0.726736	0.673163	0.0224196	1
AT1G01210	0.875294	0.106297	0.0224483	1
AT1G51380	2.81619	-1.84389	0.0226282	1
AT3G45730	-2.70758	-1.71578	0.0226282	1
AT5G48090	-2.70671	-1.71539	0.0226282	1
AT5G63720	-2.70601	-1.71577	0.0226282	1
AT1G17060	-2.70583	-1.71667	0.0226282	1
AT5G60110	-2.70568	-1.71595	0.0226282	1
AT1G18265	-2.56264	-1.77929	0.0226282	1
AT1G64130	-2.56212	-1.77871	0.0226282	1
AT3G08970	-2.56178	-1.77889	0.0226282	1
AT5G61260	-2.56143	-1.77908	0.0226282	1
AT3G43240	-0.65758	1.01222	0.0226435	1
AT3G45830	0.485479	1.96253	0.0228036	1
AT1G32640	0.351451	3.75164	0.0229533	1
AT4G16820	2.10646	-1.47986	0.023141	1
AT5G27910	-1.86036	-1.38245	0.023141	1
AT5G62130	-1.0731	-0.219676	0.0231861	1
AT4G39510	0.521658	1.73552	0.0231873	1
AT1G55210	0.516087	1.7847	0.0232877	1
AT5G59480	-0.637373	1.10412	0.0233739	1
AT5G27950	0.498543	1.88242	0.0234145	1
AT3G57720	-0.608223	1.23194	0.0234402	1
AT3G12670	0.530125	1.63775	0.0237057	1
AT3G02040	-0.364167	3.44502	0.0237302	1
AT5G22880	0.36253	3.51153	0.0237307	1
AT2G38840	0.81404	0.321504	0.0237332	1
AT2G41420	-1.36238	-0.749062	0.0237771	1
AT5G40830	-1.35701	-0.749551	0.0237771	1
AT5G15140	-1.3045	-0.778957	0.0237771	1
AT4G23660	1.28584	-0.808491	0.0237771	1
AT1G72870	-1.15993	-0.334691	0.0239163	1
AT5G23060	-1.15951	-0.33419	0.0239163	1
AT1G42980	-1.01979	-0.33315	0.0239163	1
AT2G22970	-0.79	0.458827	0.0240058	1
AT5G43450	-2.15769	-1.53871	0.0240229	1
AT4G22390	-2.15553	-1.53906	0.0240229	1
AT2G47180	-0.563009	1.54972	0.0241879	1
AT5G08750	-1.14284	-0.434696	0.0243742	1
AT2G44050	-1.09801	-0.4603	0.0243742	1
AT1G62560	-1.20597	-0.596784	0.0244036	1
AT4G39090	0.364374	3.41798	0.0245869	1
AT1G10930	-0.574874	1.44123	0.0246092	1
AT1G18800	0.552147	1.42746	0.0246092	1
AT1G25440	-0.962293	-0.0708597	0.025006	1
AT5G45960	-0.96054	-0.0725301	0.025006	1
AT4G36630	-0.677254	0.821967	0.0251055	1
AT3G19184	0.608542	1.17537	0.0251143	1
AT5G05430	-0.712079	0.747456	0.025432	1
AT3G59695	-0.321993	4.49608	0.0254443	1
AT3G17640	-0.650186	0.987535	0.0256039	1
AT1G50000	1.47485	-1.06616	0.0256477	1
AT5G26340	-1.36839	-1.03079	0.0256477	1
AT5G09440	0.459911	2.16955	0.0258318	1
AT1G15880	0.716501	0.548601	0.0258363	1
AT5G64260	0.359074	3.48617	0.0258472	1
AT1G51170	-0.772993	0.48435	0.0258601	1
AT4G20880	0.586267	1.32771	0.0259851	1
AT5G01542	-0.474803	2.09611	0.0260249	1
AT2G16580	-1.02153	-0.17643	0.0262355	1
AT1G12140	0.959289	-0.211474	0.0262355	1
AT3G26540	0.863053	0.0516748	0.0262635	1
AT3G01090	-0.508636	1.74322	0.0262817	1
AT5G07180	-0.469293	2.19039	0.0264629	1
AT3G56408	-0.453532	2.15228	0.0265799	1
AT1G49220	0.630154	0.978386	0.026938	1
AT4G11800	0.67184	0.754486	0.026999	1
AT1G67690	1.01452	-0.304937	0.0273546	1
AT3G47010	1.0143	-0.304738	0.0273546	1
AT1G64810	1.01166	-0.306304	0.0273546	1
AT1G78000	-0.963928	-0.285304	0.0273546	1
AT1G32700	0.598083	1.20899	0.0274321	1
AT4G20020	-0.666701	0.936308	0.0275242	1
AT2G19340	0.78329	0.38137	0.0277644	1
AT2G44580	-1.42434	-0.848751	0.0279265	1
AT1G30040	0.488778	1.80543	0.027952	1
AT1G55490	0.435711	2.28101	0.0280512	1
AT2G38650	-0.611983	1.16771	0.0281772	1
AT5G19855	-1.03431	-0.409434	0.0282672	1
AT3G06260	-1.03422	-0.407799	0.0282672	1
AT4G30570	-1.03249	-0.407955	0.0282672	1
AT5G16080	-1.03233	-0.408222	0.0282672	1
AT3G26640	-1.03222	-0.408146	0.0282672	1
AT4G04610	-0.595348	1.02568	0.028301	1
AT3G06220	-0.675076	0.789432	0.0286049	1
AT1G06002	0.294552	5.39094	0.0286922	1
AT1G77855	0.812496	0.0718202	0.028897	1
AT2G16400	0.385949	2.91433	0.0292367	1
AT2G27050	-0.974008	-0.131583	0.0294264	1
AT3G29300	-0.972947	-0.134456	0.0294264	1
AT2G45150	0.969258	-0.147623	0.0294264	1
AT1G21250	-0.468424	1.93085	0.0294366	1
AT3G53310	0.596793	1.16799	0.0294386	1
AT1G15580	-1.75426	-1.19572	0.0295125	1
AT1G01660	-1.75399	-1.19596	0.0295125	1
AT3G23010	1.50724	-1.1922	0.0295125	1
AT3G29810	1.50591	-1.19246	0.0295125	1
AT5G01190	-1.45837	-1.15281	0.0295125	1
AT5G57123	-0.85636	0.216835	0.0295237	1
AT5G38560	0.796878	0.192631	0.0295237	1
AT1G16080	-0.821834	0.341011	0.0298234	1
AT1G04150	-0.796758	0.328362	0.0298234	1
AT5G62030	0.779628	0.305158	0.0298234	1
AT3G60160	0.768053	0.40967	0.0298741	1
AT4G19170	-0.689105	0.803625	0.0302485	1
AT4G24520	0.353937	3.43081	0.0304589	1
AT5G27660	0.844156	-0.00501889	0.0307941	1
AT4G16990	-1.00131	-0.263137	0.0309598	1
AT2G27880	0.536886	1.40134	0.031522	1
AT2G35960	-0.836811	0.148996	0.0316239	1
AT4G27310	0.824272	0.123345	0.0316239	1
AT3G17820	-0.463059	2.00732	0.0316857	1
AT2G30360	-0.370132	3.10082	0.0319339	1
AT1G67120	0.369687	3.02112	0.0319465	1
AT1G02690	-0.625766	0.995411	0.0319595	1
AT1G50590	4.20968	-2.06656	0.0321168	1
AT4G23271	4.20964	-2.06659	0.0321168	1
AT1G14340	4.20869	-2.06702	0.0321168	1
AT1G02980	-3.97754	-2.06851	0.0321168	1
AT1G53950	-3.97754	-2.06851	0.0321168	1
AT1G59675	-3.97754	-2.06851	0.0321168	1
AT1G76430	-3.97754	-2.06851	0.0321168	1
AT2G36780	-3.97754	-2.06851	0.0321168	1
AT4G15460	-3.97754	-2.06851	0.0321168	1
AT5G28635	-3.97754	-2.06851	0.0321168	1
AT5G43110	-3.97754	-2.06851	0.0321168	1
AT5G53510	-3.97754	-2.06851	0.0321168	1
AT5G54010	-3.97754	-2.06851	0.0321168	1
AT5G13170	-3.97719	-2.06869	0.0321168	1
AT5G41800	-3.97719	-2.06869	0.0321168	1
AT1G30455	-3.97718	-2.0687	0.0321168	1
AT2G46660	-3.97718	-2.0687	0.0321168	1
AT3G60420	-3.97685	-2.06888	0.0321168	1
AT4G23220	-3.97685	-2.06888	0.0321168	1
AT5G23220	-3.97649	-2.06907	0.0321168	1
AT1G20700	-3.97615	-2.06925	0.0321168	1
AT2G37370	-3.97615	-2.06925	0.0321168	1
AT3G09405	-3.97614	-2.06926	0.0321168	1
AT5G58390	-3.97613	-2.06926	0.0321168	1
AT2G21550	-3.97579	-2.06944	0.0321168	1
AT5G55510	-3.97579	-2.06944	0.0321168	1
AT5G39630	-3.97577	-2.06945	0.0321168	1
AT2G43800	-0.416095	2.51911	0.0323294	1
AT5G65740	-1.0153	-0.33489	0.0323616	1
AT1G55320	-0.974674	-0.357876	0.0323616	1
AT5G64430	0.458313	1.9605	0.0327117	1
AT2G46220	-0.927342	-0.0926305	0.0327476	1
AT3G21090	0.504559	1.59366	0.0327728	1
AT1G21500	-1.5062	-0.954781	0.0328069	1
AT5G52640	-1.5045	-0.954016	0.0328069	1
AT1G67770	-1.43831	-0.993094	0.0328069	1
AT5G62670	0.381337	2.82473	0.0329977	1
AT2G22820	0.548276	1.21939	0.0333596	1
AT4G28060	-1.05256	-0.486703	0.0335047	1
AT2G27260	-1.05226	-0.485948	0.0335047	1
AT2G40190	-1.05212	-0.486209	0.0335047	1
AT3G13190	-0.449177	1.98251	0.033554	1
AT1G69180	-1.95643	-1.33253	0.0336275	1
AT1G22380	-1.95557	-1.33214	0.0336275	1
AT5G48850	-1.58072	-1.28512	0.0336275	1
AT2G16990	1.54894	-1.32956	0.0336275	1
AT1G17530	0.625684	0.831901	0.033644	1
AT3G17670	0.8484	0.00083245	0.0338501	1
AT5G60370	-0.844831	0.0439835	0.0338501	1
AT2G34450	0.824572	0.0327072	0.0338501	1
AT2G45690	0.821648	0.0313495	0.0338501	1
AT2G42200	-0.527536	1.44922	0.0338626	1
AT5G09260	-1.29814	-0.780626	0.0341193	1
AT5G58000	-1.24262	-0.813412	0.0341193	1
AT3G48180	-1.24192	-0.81309	0.0341193	1
AT1G51405	1.21803	-0.842336	0.0341193	1
AT2G13450	1.21638	-0.843085	0.0341193	1
AT2G47930	-1.15952	-0.626319	0.0341925	1
AT1G29690	1.15891	-0.680185	0.0341925	1
AT4G14723	-1.15843	-0.626814	0.0341925	1
AT1G08010	-0.721314	0.499215	0.0342675	1
AT1G75960	0.33245	3.64504	0.0343797	1
AT4G19865	0.805617	0.15597	0.0344382	1
AT3G12610	0.619491	0.926167	0.0344454	1
AT2G35945	-0.360677	3.12432	0.0345029	1
AT5G23530	0.429534	2.19816	0.0345107	1
AT1G20480	0.764627	0.257475	0.0346421	1
AT3G58120	-0.984779	-0.196142	0.0347169	1
AT1G20430	-0.984644	-0.197931	0.0347169	1
AT1G70750	-0.983732	-0.197523	0.0347169	1
AT3G54260	0.954575	-0.212689	0.0347169	1
AT5G41790	-0.395585	2.64108	0.0348666	1
AT2G25510	-0.689681	0.698482	0.0352277	1
AT4G25885	0.6735	0.67467	0.0352277	1
AT5G12270	0.316125	4.0719	0.0355889	1
AT1G27921	-0.384235	2.77388	0.0356289	1
AT1G21390	-0.578954	1.19216	0.0358574	1
AT3G63530	0.696926	0.597365	0.0359342	1
AT3G02140	0.50276	1.63776	0.0359744	1
AT3G46640	0.498551	1.63319	0.0359744	1
AT3G45780	0.485631	1.62941	0.0359744	1
AT4G12390	0.61673	0.94721	0.0361139	1
AT1G48710	-0.885881	-0.0508178	0.0361883	1
AT2G22100	-0.885754	-0.0516919	0.0361883	1
AT5G66300	-0.642199	0.801284	0.0363288	1
AT4G27560	-0.419481	2.26993	0.0364095	1
AT4G00030	-0.960946	-0.28773	0.0366357	1
AT1G73805	0.924753	-0.349669	0.0366357	1
AT1G78130	-0.590758	1.05251	0.0366546	1
AT1G72210	-0.440943	2.06042	0.036663	1
AT2G26210	-0.837793	0.0979829	0.0370035	1
AT4G01070	-0.432711	2.19909	0.0371882	1
AT1G71828	0.663533	0.695923	0.037236	1
AT5G45040	-0.51002	1.54893	0.0373946	1
AT3G63540	0.329398	3.64352	0.0376019	1
AT4G36610	1.98813	-1.53292	0.0376342	1
AT1G74545	1.98138	-1.53601	0.0376342	1
AT1G15010	-1.75825	-1.43119	0.0376342	1
AT3G46110	-1.75804	-1.4321	0.0376342	1
AT3G23450	-1.75695	-1.43194	0.0376342	1
AT2G42510	-1.75619	-1.4323	0.0376342	1
AT5G54250	-1.75555	-1.43269	0.0376342	1
AT1G63090	1.61278	-1.48132	0.0376342	1
AT1G02580	1.61199	-1.48169	0.0376342	1
AT5G66631	1.61163	-1.4815	0.0376342	1
AT5G43050	1.61155	-1.48155	0.0376342	1
AT4G17040	-0.706246	0.639425	0.0380939	1
AT2G18917	0.337658	3.40988	0.0381022	1
AT4G18570	-0.497129	1.67341	0.0381756	1
AT4G37580	0.630317	0.809513	0.0382366	1
AT2G01950	-0.990852	-0.433841	0.0383978	1
AT5G40030	-0.987789	-0.433123	0.0383978	1
AT5G32470	0.985359	-0.454082	0.0383978	1
AT2G41040	-1.53796	-1.11083	0.0385119	1
AT2G22640	-1.5367	-1.11061	0.0385119	1
AT1G69290	1.39059	-1.10602	0.0385119	1
AT5G24206	1.38985	-1.10635	0.0385119	1
AT3G28917	-1.2905	-1.07098	0.0385119	1
AT5G58300	-0.489544	1.5531	0.0385903	1
AT4G28680	0.888679	-0.190485	0.0386111	1
AT5G65240	-0.680678	0.551558	0.0388743	1
AT2G40760	0.612167	0.722792	0.0392834	1
AT1G21740	0.462402	1.83019	0.039393	1
AT1G26520	0.601567	0.985676	0.0395375	1
AT3G14270	-0.574981	1.01369	0.0395375	1
AT2G34150	-1.07696	-0.568502	0.0398332	1
AT5G01430	-1.07678	-0.567772	0.0398332	1
AT4G32590	1.00289	-0.593054	0.0398332	1
AT1G77990	-0.52072	1.50724	0.0400041	1
AT1G60650	0.507101	1.49673	0.0400041	1
AT3G28300	-0.722727	0.370536	0.0400394	1
AT1G18890	-0.469947	1.74872	0.0400969	1
AT1G71340	-0.610789	0.844751	0.0401788	1
AT5G23870	-0.776948	0.116067	0.0402467	1
AT5G67160	0.316187	3.73219	0.0402772	1
AT3G59670	0.775159	0.223903	0.0403056	1
AT2G28610	-1.3623	-0.883612	0.0404689	1
AT1G79640	-1.29758	-0.918524	0.0404689	1
AT1G65450	2.63527	-1.91267	0.0406241	1
AT4G10850	2.63477	-1.91324	0.0406241	1
AT1G19396	-2.56155	-1.77982	0.0406241	1
AT1G50180	-2.56091	-1.78021	0.0406241	1
AT5G05070	-2.56089	-1.78022	0.0406241	1
AT1G78440	-2.56087	-1.78019	0.0406241	1
AT3G48970	-2.56057	-1.7804	0.0406241	1
AT2G07687	-2.56052	-1.78038	0.0406241	1
AT2G01905	-2.5604	-1.77963	0.0406241	1
AT2G40330	-2.56039	-1.77964	0.0406241	1
AT5G34800	-2.56039	-1.77964	0.0406241	1
AT3G07340	-2.56038	-1.77964	0.0406241	1
AT5G11100	-2.56018	-1.78056	0.0406241	1
ATCG00030	-2.5597	-1.78001	0.0406241	1
AT1G68840	-2.39988	-1.84649	0.0406241	1
AT3G18560	-2.39987	-1.8465	0.0406241	1
AT1G21326	-2.39975	-1.84576	0.0406241	1
AT4G18170	-2.39953	-1.84668	0.0406241	1
AT1G28230	-2.03814	-1.59505	0.0406654	1
AT1G54000	-2.0371	-1.5956	0.0406654	1
AT4G13195	-2.03573	-1.59634	0.0406654	1
AT3G56550	-2.0356	-1.5956	0.0406654	1
AT3G49410	-1.19686	-0.717739	0.0406701	1
AT1G14686	-1.19682	-0.717113	0.0406701	1
AT1G73150	-0.503346	1.58332	0.0410247	1
AT3G22104	-0.909748	-0.242199	0.0410694	1
AT2G46530	0.472995	1.74798	0.0411991	1
AT3G24340	-0.663041	0.57678	0.041251	1
AT4G18970	0.661719	0.549261	0.041251	1
AT4G00020	0.660274	0.549802	0.041251	1
AT4G31650	0.498476	1.51974	0.0412791	1
AT2G47830	0.562459	1.00587	0.0412906	1
AT1G10410	-0.639527	0.768369	0.0413682	1
AT3G53990	-0.620866	0.759992	0.0413682	1
AT3G17680	0.60435	0.745965	0.0413682	1
AT3G44480	-0.452313	1.86806	0.0414531	1
AT4G31710	-0.477074	1.70765	0.0415724	1
AT3G49800	0.55677	1.08877	0.0415862	1
AT2G33435	0.479887	1.63813	0.0419286	1
AT5G20240	-0.409635	2.2866	0.042364	1
AT5G51830	-0.894411	-0.110803	0.0426286	1
AT1G61810	-0.89217	-0.113497	0.0426286	1
AT4G32960	0.865445	-0.146492	0.0426286	1
AT3G60966	0.864123	-0.147431	0.0426286	1
AT1G25390	-0.718988	0.374539	0.0428317	1
AT4G25835	0.326771	3.45552	0.043333	1
AT2G38860	-0.810866	0.0252124	0.0433875	1
AT1G80580	-0.809326	0.0252676	0.0433875	1
AT5G22750	0.787142	0.0138227	0.0433875	1
AT1G56310	-0.772653	0.167325	0.0435725	1
AT1G29340	0.770638	0.139805	0.0435725	1
AT2G43650	0.377368	2.55585	0.0436559	1
AT4G25710	0.656185	0.576453	0.0436731	1
AT3G05675	-0.644815	0.601553	0.0436731	1
AT3G53190	-0.355248	2.9355	0.0437433	1
AT5G14920	0.414818	2.16559	0.0440811	1
AT4G21650	-0.411582	2.22814	0.0443672	1
AT1G54710	-0.580729	0.96902	0.0446081	1
AT1G06660	-0.676841	0.512218	0.0447342	1
AT1G05090	0.64209	0.685502	0.0448234	1
AT5G58210	0.564051	1.05145	0.0448746	1
AT5G23770	0.456384	1.72974	0.0450771	1
AT5G41765	-1.67078	-1.23901	0.0451026	1
AT1G67330	-1.67046	-1.23918	0.0451026	1
AT4G32208	-1.67019	-1.24008	0.0451026	1
AT1G22740	-1.67007	-1.23934	0.0451026	1
AT4G06498	-1.66985	-1.24026	0.0451026	1
AT1G65250	-1.66974	-1.23952	0.0451026	1
AT2G42410	-1.66971	-1.23954	0.0451026	1
AT3G55950	-1.66971	-1.23954	0.0451026	1
AT5G51440	-1.66824	-1.23953	0.0451026	1
AT2G30250	-1.37469	-1.19466	0.0451026	1
AT1G04340	-1.37125	-1.19646	0.0451026	1
AT5G67270	-0.424818	2.10442	0.0452929	1
AT2G25710	-0.608408	0.812158	0.0456432	1
AT5G47380	-0.945169	-0.219644	0.0456436	1
AT5G67140	-0.943531	-0.218948	0.0456436	1
AT5G21160	0.334488	3.2228	0.0456456	1
AT1G14280	-0.719788	0.416914	0.045681	1
AT4G16146	0.714441	0.37983	0.045681	1
AT5G16560	-0.697223	0.402864	0.045681	1
AT4G03965	-0.696055	0.403661	0.045681	1
AT1G08750	1.05978	-0.56315	0.0457039	1
AT1G52565	-1.00564	-0.513692	0.0457039	1
AT4G39140	-1.00456	-0.512577	0.0457039	1
AT3G45290	0.355265	3.05549	0.0459369	1
AT2G39840	-0.62809	0.626716	0.0461379	1
AT1G78910	-0.454525	1.75636	0.0462682	1
AT4G21560	-0.744235	0.297804	0.0464546	1
AT4G36648	0.722728	0.274043	0.0464546	1
AT4G32340	0.720131	0.273111	0.0464546	1
AT5G16235	-0.546588	1.29566	0.0464738	1
AT2G28280	0.513716	1.2913	0.0464738	1
AT1G55920	-0.579882	0.997482	0.0465365	1
AT1G18700	0.528983	1.22634	0.0466476	1
AT5G19960	0.525563	1.22551	0.0466476	1
AT3G47420	-0.847906	-0.0701337	0.0467562	1
AT3G52230	-0.480232	1.69931	0.0468123	1
AT5G15170	0.770704	0.0512627	0.0471266	1
AT1G05562	-0.286602	4.46132	0.0473549	1
AT4G31890	0.663694	0.520335	0.0474041	1
AT5G51040	0.663594	0.51998	0.0474041	1
AT2G36950	0.465098	1.57509	0.0478689	1
AT3G62870	0.37905	2.52115	0.0478915	1
AT1G09210	-0.376997	2.56875	0.0479439	1
AT5G59750	-1.43723	-0.993632	0.0480897	1
AT5G54380	-0.604388	0.927042	0.0482622	1
AT5G07950	-0.524301	1.24808	0.0483205	1
AT2G40240	0.51359	1.23774	0.0483205	1
AT1G30650	-1.24078	-0.81454	0.0485224	1
AT3G61750	-1.24014	-0.814931	0.0485224	1
AT1G17190	-1.23811	-0.812688	0.0485224	1
AT2G24690	0.557836	1.08616	0.0485557	1
AT3G26340	0.663473	0.422569	0.0485833	1
AT2G46590	0.349349	2.85571	0.0485914	1
AT4G26260	0.398247	2.49798	0.0486087	1
AT1G44740	0.442531	1.75845	0.0486832	1
AT1G52580	0.436385	1.82592	0.0492196	1
AT1G22030	-0.482394	1.59334	0.0492272	1

## Sheet: Table3_MOCK_vs_DEX_diff_14h
Loci	logFC	logCPM	PValue	FDR
AT5G13150	8.05649	2.33145	8.45e-48	1.93e-43
AT2G42920	5.3038	2.97619	1.05e-35	1.2e-31
AT1G20790	7.99672	0.869384	1.54e-33	1.17e-29
AT5G44530	5.1494	1.58601	7.5e-29	4.28e-25
AT2G34020	6.88744	0.507293	3.15e-28	1.44e-24
AT5G57250	4.01285	2.66738	1.28e-26	4.88e-23
AT5G54190	5.22697	0.379613	3.94e-23	1.28e-19
AT4G28652	3.36366	2.12783	2.19e-20	6.23e-17
AT1G60545	-3.17043	3.78576	5.44e-18	1.38e-14
AT3G14900	2.83806	4.00682	1.69e-17	3.86e-14
AT2G47790	3.04854	2.08907	2.46e-17	5.1e-14
AT1G68620	4.10038	0.0168461	6.79e-17	1.29e-13
AT4G14080	8.53641	-1.11564	4.28e-16	7.51e-13
AT3G62810	3.65655	-0.315333	3.99e-14	6.51e-11
AT5G44440	8.09176	-1.49298	9.03e-14	1.37e-10
AT1G13260	3.65655	-0.403814	3.21e-13	4.58e-10
AT5G01215	2.2833	5.04489	1.02e-12	1.36e-09
AT4G27440	2.69007	1.84581	1.3e-12	1.65e-09
AT1G62940	3.98406	-0.710652	2.86e-12	3.43e-09
AT1G23050	2.54235	1.8155	1.46e-11	1.66e-08
AT1G54940	7.81724	-1.80931	1.92e-11	2.08e-08
AT1G69500	4.04411	-1.10714	7.07e-11	7.33e-08
AT1G09570	2.21869	2.30469	3.69e-10	3.66e-07
AT1G67990	3.43673	-0.859038	5.39e-10	5.12e-07
AT1G75490	2.55831	0.443057	6.6e-10	6.02e-07
AT4G14130	2.398	0.691134	9.78e-10	8.58e-07
AT5G44260	7.30899	-2.2181	1.04e-09	8.76e-07
AT1G01280	7.44567	-2.1694	1.58e-09	1.29e-06
AT2G38530	5.23062	-1.98241	2.12e-09	1.67e-06
AT1G16489	2.01243	1.17306	3.21e-09	2.44e-06
AT1G10090	2.31099	1.35839	3.61e-09	2.65e-06
AT4G20050	7.37895	-2.23423	3.71e-09	2.65e-06
AT3G61490	2.11617	0.90045	8.72e-09	6.03e-06
AT1G06920	3.47725	-1.51418	9.46e-09	6.34e-06
AT4G27190	2.39206	-0.227017	1.15e-08	7.49e-06
AT2G01420	2.7118	-0.751762	1.29e-08	8.1e-06
AT3G15400	2.45916	0.475026	1.31e-08	8.1e-06
AT1G23760	5.10578	-2.12421	1.52e-08	9.11e-06
AT2G44080	7.07613	-2.47922	2.16e-08	1.26e-05
AT4G15160	2.7118	-0.788105	3.01e-08	1.71e-05
AT4G35770	2.48189	0.0226603	3.08e-08	1.71e-05
AT3G50580	5.07281	-2.16704	3.42e-08	1.86e-05
AT4G04470	2.37012	0.160772	6.38e-08	3.39e-05
AT1G74545	2.75608	-0.835093	1.09e-07	5.67e-05
AT2G39330	-1.85781	1.95988	1.28e-07	6.51e-05
AT1G66090	6.98933	-2.61399	1.36e-07	6.75e-05
AT5G22260	3.90796	-1.9038	1.4e-07	6.79e-05
AT5G60510	6.9439	-2.65835	2.18e-07	0.000103755
AT3G59510	4.81811	-2.40255	2.79e-07	0.000129937
AT4G30250	-1.80995	1.50605	3.37e-07	0.000153851
AT3G59270	-2.61042	-0.717864	3.62e-07	0.000161955
AT2G33380	1.88812	0.70261	5.58e-07	0.000240057
AT5G07530	4.04561	-2.26149	5.58e-07	0.000240057
AT5G57770	6.63637	-2.89271	5.71e-07	0.000241278
AT1G20780	2.24585	-0.777167	7.97e-07	0.000330529
AT1G30010	2.26019	-0.0512919	8.23e-07	0.000333669
AT5G16380	4.11913	-2.23024	8.34e-07	0.000333669
AT5G14920	1.85494	0.847326	8.71e-07	0.000342631
AT4G27310	1.77556	0.602232	1.02e-06	0.000392429
AT1G31320	-4.63678	-2.5806	1.03e-06	0.000392429
AT1G70940	2.09525	-0.456827	1.15e-06	0.000429687
AT2G33830	1.95207	0.913015	1.37e-06	0.000504208
AT3G59530	2.36504	-0.732124	1.8e-06	0.000652547
AT3G19690	2.26413	-0.654441	2.22e-06	0.000788063
AT3G45290	1.88371	0.440284	2.25e-06	0.000788063
AT1G72960	2.61927	-1.61756	2.37e-06	0.00081774
AT2G34320	-3.28648	-2.08115	2.49e-06	0.000848971
AT3G05932	2.41334	-0.921715	2.59e-06	0.000869575
AT5G46330	2.53525	-1.40588	2.73e-06	0.000903871
AT1G06520	6.63637	-2.96004	4.19e-06	0.00136468
AT1G10640	-1.73908	0.89644	4.64e-06	0.00149131
AT3G59500	2.1384	-0.376212	4.88e-06	0.00154727
AT3G26460	2.72048	-1.75453	5.32e-06	0.00166207
AT1G17232	1.43365	3.27463	5.61e-06	0.00172989
AT5G28360	2.12874	-1.1963	6.26e-06	0.00188056
AT1G68875	4.50861	-2.70167	6.27e-06	0.00188056
AT1G07490	-2.14208	-0.656969	6.49e-06	0.00192237
AT1G72190	1.94582	-0.475036	6.9e-06	0.00201773
AT1G72610	1.40335	2.6976	7.26e-06	0.00209523
AT2G03090	-1.67558	0.279074	7.45e-06	0.00212508
AT1G02800	1.5651	1.42597	9.06e-06	0.00255089
AT5G44630	-2.28257	-1.19472	9.97e-06	0.00277258
AT4G36850	2.53525	-1.47151	1.05e-05	0.00284664
AT1G18000	1.33342	3.42076	1.05e-05	0.00284664
AT1G23550	2.37576	-1.15156	1.26e-05	0.00337858
AT5G53160	1.64817	0.933308	1.38e-05	0.00366384
AT5G33382	-3.69206	-2.6423	1.53e-05	0.00396945
AT3G13220	2.29669	-1.11525	1.53e-05	0.00396945
AT1G64660	2.17296	-1.2359	1.59e-05	0.00403499
AT1G25560	1.99031	-0.700115	1.59e-05	0.00403499
AT4G31610	1.36074	2.47769	1.68e-05	0.00421506
AT5G59700	2.42426	-1.43224	1.76e-05	0.00436409
AT3G21560	1.4537	1.19723	1.94e-05	0.00475979
AT3G23770	6.38759	-3.20522	1.99e-05	0.00478923
AT1G28330	1.56791	2.62947	1.99e-05	0.00478923
AT5G52310	1.60647	1.67788	2.22e-05	0.00527886
AT3G54260	2.38652	-1.56039	2.37e-05	0.00557912
AT4G04610	-1.92795	-0.51637	2.41e-05	0.00558888
AT1G68190	2.45414	-1.65468	2.44e-05	0.00558888
AT1G18010	1.26872	3.36419	2.45e-05	0.00558888
AT3G05870	1.53423	1.25301	2.79e-05	0.00629489
AT5G57000	2.32845	-1.49386	2.98e-05	0.00666115
AT1G58270	1.5546	1.28841	3.04e-05	0.00673646
AT5G11990	6.31806	-3.27394	3.39e-05	0.00736933
AT1G13710	-1.39028	2.51457	3.39e-05	0.00736933
AT3G15170	-2.69421	-2.05027	3.47e-05	0.00747427
AT4G29690	3.50253	-2.73704	3.62e-05	0.00770955
AT3G22800	-1.63622	-0.460869	4e-05	0.00845495
AT3G06870	-1.40405	3.89951	4.04e-05	0.00845654
AT3G48100	4.17745	-2.99442	4.08e-05	0.00846681
AT3G63095	3.2682	-2.48103	4.32e-05	0.00888254
AT3G61970	2.49932	-1.94992	4.73e-05	0.0096356
AT3G45780	1.71235	-0.206175	4.84e-05	0.00976055
AT1G53440	1.3251	2.68687	4.98e-05	0.00995404
AT1G68630	-1.37911	4.58222	5.33e-05	0.0105683
AT3G42960	2.25602	-1.34991	5.61e-05	0.011036
AT5G25340	1.22774	5.06813	5.69e-05	0.0110871
AT5G01840	-2.21764	-1.74436	5.79e-05	0.0111547
AT1G11920	6.24501	-3.34624	5.82e-05	0.0111547
AT1G08592	1.54792	-0.42916	6.85e-05	0.0130283
AT4G19620	2.8218	-2.18951	6.93e-05	0.0130535
AT5G19150	1.43936	0.647283	7.19e-05	0.0134398
AT1G31485	-1.514	0.44563	7.42e-05	0.013754
AT5G64380	2.18057	-1.48821	7.86e-05	0.0144557
AT3G03140	1.55478	0.769202	8.29e-05	0.0151175
AT1G67770	-2.94201	-2.79427	8.67e-05	0.0157029
AT1G75540	1.9209	-1.09601	8.85e-05	0.015892
AT3G55710	2.83533	-2.43558	0.000100294	0.0176417
AT5G51210	6.08678	-3.48163	0.000100553	0.0176417
AT5G66380	6.00064	-3.56017	0.000100553	0.0176417
AT3G61510	1.96414	-1.67857	0.000112458	0.0195345
AT5G09970	-2.20061	-1.90266	0.000113055	0.0195345
AT2G42880	1.37626	0.797543	0.000114764	0.0196807
AT2G44140	1.3702	4.89528	0.000118591	0.0201853
AT2G19060	1.5655	1.49293	0.00012892	0.0217809
AT3G45590	1.71374	-0.926932	0.000130682	0.0219003
AT2G34330	-1.73234	-0.174094	0.000131548	0.0219003
AT5G15140	3.44651	-2.84006	0.000135007	0.0223133
AT1G09880	2.88077	-2.4355	0.000146789	0.0238604
AT3G20340	2.78842	-2.49047	0.000146789	0.0238604
AT5G27840	-1.57582	-0.249519	0.000147506	0.0238604
AT1G79790	1.51814	0.931029	0.000164419	0.0264089
AT1G68540	2.46477	-2.02706	0.000169573	0.0270462
AT1G76430	6.08678	-3.50313	0.000174996	0.0275263
AT3G19390	6.08678	-3.50321	0.000174996	0.0275263
AT1G21400	1.53634	0.197584	0.000179724	0.0280763
AT2G18500	-1.77573	-1.10094	0.000182184	0.0281863
AT3G61430	1.75251	-0.83387	0.000183088	0.0281863
AT4G25640	1.45096	0.649346	0.000184135	0.0281863
AT1G30660	-2.4976	-2.22962	0.000186322	0.0283308
AT5G20250	1.38631	3.32468	0.000189333	0.028598
AT3G59695	-1.29523	2.69248	0.000213766	0.0320761
AT3G57620	2.22068	-1.73497	0.000218025	0.0324508
AT1G25230	2.02086	-1.59668	0.000220081	0.0324508
AT1G75940	3.07717	-2.65049	0.000220531	0.0324508
AT2G36570	1.28438	1.33228	0.000222915	0.0325913
AT2G43520	-2.20061	-1.89046	0.000248114	0.0360444
AT1G28100	1.05727	4.47063	0.000252427	0.0364389
AT5G57720	-1.54477	-0.611617	0.000259869	0.0372774
AT4G08950	2.07608	-1.58342	0.000285018	0.040539
AT4G36230	3.97818	-3.20333	0.000286162	0.040539
AT3G21080	-2.56978	-2.41014	0.000290118	0.0408457
AT1G15460	5.90904	-3.68015	0.000306835	0.0421584
AT5G20260	5.90904	-3.67297	0.000306835	0.0421584
AT5G44550	5.90904	-3.68015	0.000306835	0.0421584
AT3G25640	-5.85491	-3.74006	0.000306835	0.0421584
AT1G10060	1.48593	0.20061	0.00031334	0.0425688
AT3G27390	-1.73731	-1.20896	0.000313554	0.0425688
AT1G61050	2.78842	-2.5189	0.000316113	0.0426622
AT1G23560	2.08633	-1.69021	0.000329049	0.0429573
AT5G40390	-3.28121	-3.03096	0.000330086	0.0429573
AT1G02710	3.19773	-3.03785	0.000330086	0.0429573
AT5G57560	1.91658	-1.30748	0.000332688	0.0429573
AT5G55970	2.97126	-2.72443	0.000333367	0.0429573
AT1G76470	-2.94201	-2.78537	0.000333367	0.0429573
AT5G52390	-2.94201	-2.78396	0.000333367	0.0429573
AT5G42800	2.85694	-2.78662	0.000333367	0.0429573
AT2G13360	1.43442	1.27315	0.000351867	0.0450864
AT4G11320	-1.30543	0.936347	0.000359521	0.045418
AT3G13210	1.94016	-1.22597	0.000360277	0.045418
AT4G31620	-1.66264	-1.11298	0.000360429	0.045418
AT5G61520	-2.41078	-2.28859	0.000367873	0.0461013
AT5G25470	1.2324	0.265561	0.000383688	0.0478205
AT5G25460	1.21423	2.24814	0.000390432	0.0483965
AT1G60990	1.72502	-0.937523	0.000427884	0.0527523
AT3G47340	1.34717	2.52435	0.00043287	0.05308
AT4G35410	1.47705	-0.0134729	0.000439465	0.0536006
AT5G06860	1.43897	0.258563	0.000454053	0.0550853
AT5G22390	3.82818	-3.33583	0.000470874	0.0562287
AT3G62820	3.7469	-3.3833	0.000470874	0.0562287
AT2G01500	3.66076	-3.44362	0.000470874	0.0562287
AT2G15890	1.43199	0.450709	0.00048687	0.0578361
AT3G29240	1.25752	1.49031	0.000501902	0.0587642
AT1G49130	2.97126	-2.74359	0.000504988	0.0587642
AT1G58310	-2.88124	-2.84487	0.000504988	0.0587642
AT5G26990	-2.49462	-2.79423	0.000504988	0.0587642
AT5G12270	1.17912	1.66359	0.000528325	0.0600252
AT1G01305	5.81121	-3.77781	0.000542143	0.0600252
AT1G02980	5.81121	-3.77781	0.000542143	0.0600252
AT5G60090	5.81121	-3.77781	0.000542143	0.0600252
AT1G30840	-5.74991	-3.84555	0.000542143	0.0600252
AT1G72520	5.70627	-3.86023	0.000542143	0.0600252
AT1G75530	5.70627	-3.84567	0.000542143	0.0600252
AT3G16120	5.70627	-3.86816	0.000542143	0.0600252
AT4G37770	5.70627	-3.85282	0.000542143	0.0600252
AT5G64667	5.70627	-3.86069	0.000542143	0.0600252
AT1G75640	-1.27971	0.78167	0.000545346	0.0600882
AT4G02290	1.10257	2.88694	0.000559871	0.061392
AT5G58640	1.22466	0.287388	0.000572394	0.0624649
AT4G39210	1.44317	-0.390784	0.00061301	0.0665788
AT3G54810	1.51949	-0.524052	0.000638418	0.0690097
AT2G19920	-1.29843	0.474605	0.000647033	0.069611
AT4G35190	1.17045	1.93425	0.000656165	0.070262
AT4G37022	1.96497	-1.8885	0.000670481	0.0714594
AT1G21310	-1.11551	1.88671	0.000682733	0.0724268
AT5G54250	-2.31841	-2.36941	0.000728936	0.0766877
AT4G39480	-1.44469	-0.349559	0.000729623	0.0766877
AT4G22880	1.83062	-1.84016	0.000739056	0.0773229
AT5G66400	2.04144	-1.99763	0.000803201	0.0836503
AT5G56550	1.50972	-0.341679	0.000830301	0.0860796
AT4G06744	2.10971	-2.26049	0.000853355	0.0880694
AT2G34650	-1.72379	-1.88963	0.000888535	0.0911656
AT1G07485	-1.17176	1.95554	0.000891351	0.0911656
AT4G26795	-1.15412	3.07702	0.000906398	0.0922908
AT1G06080	1.23753	0.37202	0.000943413	0.0956327
AT2G40940	1.53123	-0.925944	0.000949167	0.0957903
AT1G23090	-1.27797	0.407468	0.000956717	0.0961269
AT5G48890	5.70627	-3.86788	0.000965497	0.0961618
AT5G61270	-5.63666	-3.96077	0.000965497	0.0961618
AT2G05540	1.65519	-0.832874	0.000998529	0.0990194
AT2G27500	2.58383	-2.67424	0.00101038	0.0997611
AT4G39920	1.54894	-0.74687	0.00104312	0.10255
AT1G06690	1.03985	-0.785113	0.00106379	0.104132
AT5G54200	1.36088	-0.338388	0.00108814	0.105812
AT1G30810	1.42308	0.00195961	0.00109022	0.105812
AT3G29370	1.8206	-1.65423	0.00111066	0.106886
AT5G49360	1.75953	-1.67263	0.00111066	0.106886
AT4G17480	1.60531	-1.32423	0.00111644	0.10699
AT1G02050	1.31553	1.01839	0.00114762	0.109518
AT3G53260	-1.20411	0.190831	0.00116072	0.110277
AT1G61820	-2.36483	-2.90658	0.00116524	0.110277
AT4G20320	-1.10457	1.86212	0.00120143	0.113232
AT1G48360	-1.41537	-0.778155	0.00122384	0.11487
AT5G20110	1.70474	-1.5254	0.00123193	0.115155
AT3G29590	2.9782	-3.24032	0.00128944	0.119271
AT1G77960	3.66076	-3.4848	0.00129164	0.119271
AT2G24850	-3.64848	-3.55318	0.00129164	0.119271
AT4G37580	1.38025	-0.623199	0.00129719	0.1193
AT2G23940	1.38837	-0.143232	0.00130674	0.119314
AT1G62170	-1.20706	2.45355	0.00131275	0.119314
AT2G16430	1.44643	-0.575877	0.00131303	0.119314
AT1G10140	1.68662	-1.38415	0.00133439	0.120773
AT2G34500	1.39037	-0.974988	0.0013474	0.121468
AT4G03150	1.55401	-1.35217	0.00137938	0.123862
AT2G36792	1.61806	-0.807445	0.00141591	0.126643
AT2G45870	2.13294	-2.4503	0.00144794	0.129003
AT4G23250	1.45054	-0.74286	0.00145412	0.129049
AT1G51355	-2.88124	-2.83831	0.00149181	0.131881
AT5G03350	1.17463	0.108683	0.00152918	0.134662
AT5G04770	1.51074	-1.00894	0.00158058	0.138654
AT1G52890	2.15376	-2.27252	0.0016345	0.142834
AT4G00870	-1.16241	0.735177	0.0017107	0.147526
AT5G25980	1.19642	2.31513	0.00172274	0.147526
AT1G54560	5.5931	-3.9955	0.00173347	0.147526
AT2G35710	5.5931	-3.99634	0.00173347	0.147526
AT5G18250	5.5931	-3.98792	0.00173347	0.147526
AT1G05700	-5.51377	-4.09066	0.00173347	0.147526
AT2G34920	-5.51377	-4.08485	0.00173347	0.147526
AT3G03030	1.52133	-1.8806	0.00175114	0.148476
AT4G31550	-2.29528	-2.97119	0.0017742	0.149874
AT5G57970	-2.30909	-2.63906	0.00178508	0.150237
AT1G36370	-1.29635	-0.439078	0.00179375	0.150411
AT5G59020	-1.54787	-1.70396	0.00183031	0.152914
AT2G42010	1.45243	-0.985611	0.0019115	0.159115
AT1G75080	-1.1348	3.53384	0.00192547	0.159695
AT1G79060	-1.14102	0.738416	0.00194901	0.161061
AT3G06100	3.05515	-3.19931	0.00204093	0.167444
AT3G59350	2.9782	-3.25522	0.00204093	0.167444
AT5G22920	1.23221	1.21097	0.00206181	0.168551
AT5G59732	-1.08968	5.00021	0.00207512	0.169033
AT1G52620	1.67211	-1.2693	0.00214055	0.172873
AT2G19070	3.66076	-3.50017	0.00215257	0.172873
AT5G05220	3.66076	-3.49887	0.00215257	0.172873
AT5G16920	3.56915	-3.58579	0.00215257	0.172873
AT4G30980	-2.81781	-2.89346	0.00220438	0.175183
AT1G05010	-2.43119	-2.84973	0.00220438	0.175183
AT3G48460	2.34536	-2.85382	0.00220438	0.175183
AT1G11670	-1.19177	0.0220958	0.00225725	0.177777
AT2G15960	1.35651	-0.00919312	0.00226708	0.177777
AT2G30150	1.12487	-0.0333674	0.00226708	0.177777
AT5G07440	1.24672	0.945873	0.00227357	0.177777
AT1G72630	1.36908	-1.01196	0.00227599	0.177777
AT1G13670	1.30838	-0.795204	0.00232113	0.179976
AT5G02890	1.21352	-0.447349	0.00232783	0.179976
AT1G68640	-1.21329	-0.425826	0.00232783	0.179976
AT3G26590	-1.61194	-1.74372	0.00234879	0.180984
AT4G27260	-0.970293	1.21951	0.00237349	0.182271
AT3G26330	-1.64463	-1.61685	0.00247429	0.189375
AT3G23150	1.58466	-1.53288	0.002523	0.192457
AT1G14630	-1.58657	-1.48383	0.00256394	0.194253
AT1G11260	1.37725	-0.163036	0.00256485	0.194253
AT1G74880	2.2227	-2.66762	0.00257209	0.194253
AT1G16070	-1.88953	-2.15462	0.00260804	0.195945
AT3G11980	1.37543	0.264478	0.0026199	0.195945
AT1G54020	-1.4658	-1.34301	0.00262641	0.195945
AT5G67300	1.32632	-0.369038	0.00262887	0.195945
AT4G23450	1.36028	-1.25411	0.00266831	0.198229
AT3G01750	1.48575	-1.16095	0.00268317	0.198229
AT5G63650	1.32795	-0.604821	0.00268558	0.198229
AT5G02160	1.46736	-0.769439	0.00271153	0.198489
AT1G71880	1.36255	-0.933443	0.00271499	0.198489
AT1G10050	1.34994	-0.888038	0.00271522	0.198489
AT1G17745	-1.01966	1.27479	0.00280587	0.204297
AT1G70560	1.1429	0.292393	0.00281371	0.204297
AT4G34000	1.27901	-0.107273	0.00282154	0.204297
AT1G65810	-1.64833	-1.94239	0.00284945	0.205665
AT2G23180	-2.11376	-2.55203	0.0028791	0.20715
AT1G20480	1.56059	-1.90295	0.00293953	0.210832
AT1G03100	1.11705	1.82716	0.00296408	0.211927
AT1G64080	-1.15312	0.0656388	0.00298506	0.21276
AT4G16267	-1.18392	0.758496	0.0030127	0.21335
AT2G36030	-1.05292	1.92198	0.00302587	0.21335
AT5G57900	1.232	0.00187441	0.00303906	0.21335
AT5G02540	1.7156	-1.66033	0.00307241	0.21335
AT1G04770	-1.64569	-1.71001	0.00307241	0.21335
AT2G01021	1.73262	-1.55662	0.00311977	0.21335
AT1G21830	1.28884	-0.741184	0.00313736	0.21335
AT1G18960	5.47028	-4.11987	0.00313842	0.21335
AT1G70220	5.47028	-4.11213	0.00313842	0.21335
AT4G30050	5.47028	-4.11987	0.00313842	0.21335
AT5G44330	5.47028	-4.11232	0.00313842	0.21335
AT5G46370	5.47028	-4.11978	0.00313842	0.21335
AT5G56510	5.47028	-4.11987	0.00313842	0.21335
AT1G23100	-5.37942	-4.22904	0.00313842	0.21335
AT3G15240	-5.37942	-4.23021	0.00313842	0.21335
AT4G39090	1.10724	1.41923	0.00314785	0.21335
AT5G21150	-1.21767	-0.76473	0.00315236	0.21335
AT1G77880	1.4399	-1.50697	0.00318539	0.214948
AT5G07140	-1.45677	-1.42316	0.0032065	0.215734
AT5G13110	1.42384	-1.36801	0.00322136	0.2159
AT3G14910	1.4446	-1.12153	0.00323548	0.2159
AT5G38430	1.50803	-1.16475	0.00323736	0.2159
AT3G29300	-2.75145	-2.95096	0.00325897	0.216707
AT3G62100	-1.7531	-2.26935	0.00333554	0.221154
AT2G20670	1.20821	0.78857	0.00337602	0.223189
AT5G06865	1.00406	3.10091	0.00344602	0.227159
AT2G44500	1.88638	-2.13521	0.00349913	0.229994
AT1G01680	-3.44561	-3.73586	0.00360115	0.234671
AT1G47960	-3.44561	-3.73659	0.00360115	0.234671
AT2G31230	-3.44561	-3.74765	0.00360115	0.234671
AT5G38420	1.85605	-2.02091	0.00362844	0.235776
AT1G62380	1.10164	0.233633	0.00367133	0.237885
AT3G63510	2.10367	-2.74213	0.00370638	0.239476
AT1G49475	-1.68655	-1.89413	0.00380605	0.244728
AT3G06483	1.376	-0.993556	0.00380912	0.244728
AT3G22570	-1.3761	-0.525948	0.00392246	0.249227
AT1G06700	1.27949	-0.499026	0.00392246	0.249227
AT1G62030	-1.48924	-1.644	0.00393177	0.249227
AT3G18760	1.64097	-1.52382	0.00394825	0.249227
AT4G25760	1.55567	-1.56176	0.00394825	0.249227
AT2G29760	1.60531	-1.39266	0.00395557	0.249227
AT3G22840	1.40968	-1.53154	0.00395564	0.249227
AT3G10575	2.13294	-2.51374	0.00405915	0.254343
AT5G40270	-2.05772	-2.59469	0.00405915	0.254343
AT2G40110	-2.14522	-3.09539	0.00412669	0.257867
AT5G05270	-0.987335	0.88216	0.00428673	0.267136
AT3G14210	-1.76739	-2.42776	0.00433196	0.269219
AT5G24330	-1.86958	-2.33443	0.00453884	0.279617
AT1G56050	1.51195	-2.46055	0.00453884	0.279617
AT1G02640	1.13296	0.774731	0.00455326	0.279617
AT1G06180	-1.28162	-1.05655	0.00456057	0.279617
AT1G27180	-1.25899	-1.06067	0.00456057	0.279617
AT4G18970	1.15564	-0.314002	0.00462311	0.282691
AT1G34060	-1.80003	-2.22282	0.0046921	0.284621
AT5G66300	-1.80003	-2.22383	0.0046921	0.284621
AT5G10530	-1.65199	-2.18851	0.0046921	0.284621
AT4G31250	1.06501	0.209309	0.00473788	0.286635
AT2G18700	1.09624	1.24803	0.00481652	0.290622
AT5G36910	1.50082	-1.44075	0.0048771	0.291216
AT1G58350	-1.47628	-1.47156	0.0048771	0.291216
AT2G36870	1.41717	-1.46843	0.0048771	0.291216
AT5G16960	1.79522	-1.93924	0.00487744	0.291216
AT2G22820	1.45991	-1.6832	0.00495226	0.294911
AT1G14360	0.900159	1.2551	0.00497214	0.295324
AT1G10070	1.09619	0.808291	0.005008	0.296682
AT4G20300	-1.04233	0.491322	0.0050578	0.298856
AT3G48390	2.89692	-3.34031	0.00514236	0.299967
AT3G51590	2.89692	-3.34028	0.00514236	0.299967
AT1G23965	-2.80245	-3.45853	0.00514236	0.299967
AT5G24355	2.62135	-3.53297	0.00514236	0.299967
AT4G32000	-2.2727	-3.37793	0.00514236	0.299967
AT4G36040	1.04092	1.7689	0.00516368	0.300442
AT3G27415	-2.12658	-2.7857	0.00533966	0.309891
AT5G14460	-0.977119	1.48336	0.00536926	0.310818
AT2G42835	1.0158	0.386262	0.00539362	0.311437
AT3G59140	-1.18031	-0.409917	0.00542261	0.31232
AT4G36250	1.03713	0.926856	0.0054522	0.312721
AT2G34490	-1.38678	-0.725159	0.00548841	0.312721
AT3G08890	1.26242	-0.739051	0.00557911	0.312721
AT5G47435	-0.934119	0.319676	0.00565257	0.312721
AT5G65280	-1.25801	-1.23625	0.0056716	0.312721
AT3G60970	2.02702	-2.579	0.00572014	0.312721
AT3G09690	1.21682	-0.288347	0.00572645	0.312721
AT1G15320	5.33603	-4.25524	0.00573121	0.312721
AT1G73050	5.33603	-4.25534	0.00573121	0.312721
AT3G13910	5.33603	-4.24771	0.00573121	0.312721
AT3G48360	5.33603	-4.25534	0.00573121	0.312721
AT4G21120	5.33603	-4.25534	0.00573121	0.312721
AT4G34332	5.33603	-4.25534	0.00573121	0.312721
AT5G13370	5.33603	-4.24762	0.00573121	0.312721
AT5G40940	5.33603	-4.25534	0.00573121	0.312721
AT5G58460	5.33603	-4.25534	0.00573121	0.312721
AT1G72130	-5.23126	-4.37729	0.00573121	0.312721
AT3G13950	-5.23126	-4.3797	0.00573121	0.312721
AT5G01150	-5.23126	-4.37966	0.00573121	0.312721
AT5G18710	-5.23126	-4.37968	0.00573121	0.312721
AT4G24480	5.18799	-4.39755	0.00573121	0.312721
AT3G20395	5.023	-4.53419	0.00573121	0.312721
AT5G52190	1.43523	-1.27461	0.00575693	0.31276
AT2G36200	1.04938	0.918377	0.00575934	0.31276
AT1G08630	1.22931	0.0269605	0.00579301	0.313841
AT5G54569	1.19111	-0.314683	0.00581818	0.314457
AT3G26510	1.45525	-1.33358	0.00584226	0.315012
AT1G29980	0.972709	0.887137	0.00586545	0.315517
AT3G15020	-1.71344	-2.47115	0.00598942	0.319934
AT2G32150	1.52766	-1.44165	0.00600967	0.319934
AT4G18550	3.36639	-3.77466	0.00604575	0.319934
AT5G48850	-3.33236	-3.85549	0.00604575	0.319934
AT4G30180	-3.33236	-3.84926	0.00604575	0.319934
AT1G20816	3.25322	-3.85748	0.00604575	0.319934
AT5G42680	3.25322	-3.84988	0.00604575	0.319934
AT4G28395	1.58466	-1.57356	0.00616477	0.325099
AT2G22990	1.92321	-2.28343	0.00617187	0.325099
AT1G21680	1.18924	0.301524	0.00619852	0.325751
AT3G63210	-1.06448	0.0252561	0.00626869	0.327278
AT5G45469	1.71264	-2.24424	0.0062871	0.327278
AT1G76600	2.52387	-3.12413	0.00629933	0.327278
AT2G35230	2.27951	-3.28876	0.00629933	0.327278
AT5G61090	-2.06391	-3.16238	0.00629933	0.327278
AT3G43800	-1.69743	-2.1469	0.0063506	0.328446
AT1G28670	1.65397	-2.13397	0.0063506	0.328446
AT4G29240	-1.52718	-2.03779	0.00637449	0.328935
AT5G38410	1.13744	0.352483	0.00644349	0.331557
AT1G50270	-1.2504	-0.540498	0.00645437	0.331557
AT4G24230	1.00288	1.35759	0.00665794	0.341245
AT1G23080	0.96064	0.779808	0.00672908	0.344119
AT4G34860	1.11134	1.15518	0.00674774	0.344301
AT1G10120	1.00072	0.769782	0.00680293	0.346342
AT3G61460	0.90075	1.36578	0.0068296	0.346926
AT2G39805	1.21185	-0.891616	0.00684622	0.346997
AT5G15581	0.70345	5.20104	0.00704599	0.35633
AT3G10340	2.27902	-2.95067	0.00712436	0.358703
AT2G35750	-1.9176	-2.97023	0.00712436	0.358703
AT1G80380	1.42384	-1.42662	0.00725366	0.364408
AT5G24060	1.28038	-1.01578	0.00730458	0.36616
AT4G15475	-1.06041	0.343118	0.00740899	0.37058
AT2G16910	1.23475	-0.545243	0.00747845	0.373235
AT5G04040	1.21601	-0.812481	0.00761215	0.378375
AT1G34420	-1.11809	-0.4132	0.00761461	0.378375
AT5G17220	1.97392	-2.83914	0.00768827	0.380339
AT1G17050	-1.37013	-1.6483	0.0076948	0.380339
AT3G18773	-1.02804	1.92477	0.00770418	0.380339
AT2G24692	-1.36917	-1.18802	0.00782912	0.383677
AT1G27150	1.31593	-1.15611	0.00782912	0.383677
AT3G60957	1.16972	-1.19941	0.00782912	0.383677
AT5G39090	1.39161	-1.737	0.00783951	0.383677
AT3G16340	-0.92104	0.662734	0.00785588	0.383677
AT5G06690	1.55778	-1.76346	0.00797906	0.388031
AT1G75900	-1.40785	-1.79942	0.00797906	0.388031
AT3G20170	1.25591	-1.23528	0.00802016	0.3892
AT1G07340	2.02702	-2.59824	0.00805445	0.389208
ATMG00410	-1.72465	-2.65064	0.00805445	0.389208
AT3G60160	1.12848	-0.495744	0.00812007	0.389583
AT3G53190	-0.928051	2.25501	0.00813646	0.389583
AT3G18900	-2.70458	-3.54148	0.00817908	0.389583
AT5G16080	-2.70458	-3.55182	0.00817908	0.389583
AT1G52340	-2.17482	-3.46561	0.00817908	0.389583
AT4G02970	1.22983	-0.688587	0.00818178	0.389583
AT4G27460	1.19558	-0.696361	0.00818178	0.389583
AT1G10610	1.5988	-1.94504	0.00822669	0.390905
AT4G00050	-2.05772	-2.58675	0.00827359	0.391502
AT1G15770	1.69845	-2.57388	0.00827359	0.391502
AT5G19140	0.889071	1.39475	0.00833576	0.393627
AT1G72060	0.844795	1.92078	0.00838025	0.39457
AT2G40820	-1.65199	-2.18101	0.00839032	0.39457
AT1G22370	-1.70459	-2.28722	0.00841612	0.394969
AT2G40240	1.06496	-0.287804	0.00859447	0.401972
AT3G56690	1.28038	-1.02134	0.00860059	0.401972
AT1G17744	-0.950896	4.83638	0.00864563	0.40325
AT2G24545	0.971675	0.316952	0.00876872	0.408157
AT5G17210	1.21601	-0.820824	0.00881158	0.409317
AT5G21170	1.21635	-0.626588	0.00892124	0.41345
AT5G15580	0.835234	2.28309	0.00893682	0.41345
AT2G46160	-1.16742	-0.871089	0.00904493	0.417605
AT5G62580	-0.941551	0.0142908	0.00907419	0.41811
AT1G32700	1.1023	-0.241125	0.00916079	0.421249
AT2G42900	1.10332	-0.381802	0.00918584	0.421551
AT4G23440	0.911699	0.72525	0.00926695	0.424419
AT5G03668	-0.886963	3.66927	0.00940167	0.429726
AT3G56360	-1.33637	-1.66692	0.00959615	0.436015
AT5G38860	1.23049	-1.25309	0.00960002	0.436015
AT1G21326	2.44693	-3.19748	0.00961573	0.436015
AT4G07670	2.27951	-3.31104	0.00961573	0.436015
AT1G14350	0.943605	0.265146	0.00980456	0.441092
AT2G36790	1.34244	-0.996111	0.00982814	0.441092
AT2G44460	-1.38795	-1.74391	0.00985043	0.441092
AT4G17340	-1.15515	-0.470185	0.00987099	0.441092
AT2G16580	-1.3031	-1.30349	0.00988534	0.441092
AT2G34180	-1.22629	-0.637393	0.00991327	0.441092
AT3G47420	-1.12902	-0.629715	0.00991327	0.441092
AT2G18550	-1.46844	-1.84671	0.0101077	0.441092
AT1G80920	0.949764	2.64315	0.0101549	0.441092
AT1G32060	1.0899	-0.0187609	0.0101579	0.441092
AT1G76780	-1.07743	-0.037203	0.0101579	0.441092
AT4G36350	3.25322	-3.87962	0.0101811	0.441092
AT3G20470	-3.20946	-3.96636	0.0101811	0.441092
AT3G23120	-3.20946	-3.96737	0.0101811	0.441092
AT3G53210	-3.20946	-3.96623	0.0101811	0.441092
AT2G41230	3.1304	-3.97075	0.0101811	0.441092
AT3G21520	3.1304	-3.97036	0.0101811	0.441092
AT5G26790	3.1304	-3.95537	0.0101811	0.441092
AT1G75860	-1.1133	-0.658986	0.0101827	0.441092
AT1G29310	1.36028	-1.3372	0.0101865	0.441092
AT4G24510	1.26948	-1.08704	0.0104308	0.441092
AT1G80360	-1.00337	-0.680792	0.0104676	0.441092
AT5G66800	-1.14674	-0.894616	0.0104961	0.441092
AT1G05870	-1.19043	-1.40733	0.0105044	0.441092
AT1G80450	-2.14522	-3.0855	0.0105258	0.441092
AT2G26355	-2.14522	-3.08452	0.0105258	0.441092
AT5G46080	-2.14522	-3.08346	0.0105258	0.441092
AT1G02610	2.13645	-3.05208	0.0105258	0.441092
AT1G08135	5.18799	-4.40525	0.0105593	0.441092
AT1G67980	5.18799	-4.40525	0.0105593	0.441092
AT1G75790	5.18799	-4.40525	0.0105593	0.441092
AT3G30340	5.18799	-4.40525	0.0105593	0.441092
AT3G57950	5.18799	-4.40525	0.0105593	0.441092
AT4G25010	5.18799	-4.40525	0.0105593	0.441092
AT5G37415	5.18799	-4.40525	0.0105593	0.441092
AT5G56110	5.18799	-4.40525	0.0105593	0.441092
AT1G33785	-5.06613	-4.54812	0.0105593	0.441092
AT5G57480	-5.06613	-4.55174	0.0105593	0.441092
AT3G55700	5.023	-4.5498	0.0105593	0.441092
AT5G11130	5.023	-4.56537	0.0105593	0.441092
AT5G47980	5.023	-4.5496	0.0105593	0.441092
AT5G60660	5.023	-4.56537	0.0105593	0.441092
AT2G07724	4.83668	-4.72435	0.0105593	0.441092
AT1G48100	-1.05078	0.458426	0.0106852	0.445537
AT1G10110	0.786851	1.8776	0.0107782	0.448592
AT3G19490	1.12969	-0.932509	0.0108157	0.449333
AT1G07380	-1.99067	-2.90376	0.0110591	0.455853
AT5G49410	1.97392	-2.86471	0.0110591	0.455853
AT5G26622	1.46907	-2.24671	0.0110721	0.455853
AT4G13540	0.846932	1.29634	0.0111008	0.455853
AT1G78610	-1.25801	-1.21615	0.0111103	0.455853
AT1G70730	1.15408	-0.454148	0.0111161	0.455853
AT1G61600	-0.983586	1.1107	0.0111513	0.455853
AT1G03610	1.19917	-0.964411	0.0111553	0.455853
AT5G25800	1.38817	-1.52935	0.011193	0.455853
AT1G22470	-1.35407	-1.56066	0.011193	0.455853
AT5G39330	-1.20407	-1.54106	0.011193	0.455853
AT1G56220	1.06041	0.548623	0.0112517	0.455853
AT5G28050	1.66572	-2.29462	0.0112524	0.455853
AT4G28990	1.61723	-2.32497	0.0112524	0.455853
AT2G22140	-1.87521	-2.74276	0.0113284	0.456007
AT1G64110	1.85196	-2.71502	0.0113284	0.456007
AT1G65620	1.85196	-2.71609	0.0113284	0.456007
AT5G13380	1.78236	-2.39097	0.0113762	0.456007
AT5G43530	-1.71344	-2.45208	0.0113762	0.456007
AT1G61970	-1.54845	-2.42477	0.0113762	0.456007
AT3G55240	-1.78541	-2.59282	0.011415	0.456759
AT1G62180	-1.22964	-1.02319	0.0115166	0.460019
AT3G16470	-0.85442	3.58433	0.0117163	0.466945
AT1G23052	1.03649	-0.54317	0.0117468	0.466945
AT3G56370	-0.810843	1.63474	0.0117514	0.466945
AT1G03090	0.94413	1.14015	0.0117923	0.467754
AT4G29700	-0.859158	1.92896	0.0118419	0.468908
AT4G21980	-1.06621	-0.115289	0.0119427	0.471761
AT2G20870	1.465	-1.65762	0.0119554	0.471761
AT1G04150	-1.21943	-1.37323	0.0123017	0.484534
AT1G32870	1.42616	-1.75968	0.012364	0.484534
AT1G77760	-1.40785	-1.78612	0.012364	0.484534
AT1G76420	-1.31624	-1.77599	0.012364	0.484534
AT3G23270	-1.13316	-0.380059	0.0125423	0.489837
AT4G00752	1.05523	-0.365993	0.0125423	0.489837
AT3G23840	1.30325	-1.13602	0.0127511	0.49317
AT5G64410	1.23426	-1.15901	0.0127511	0.49317
AT4G35335	1.21052	-1.16335	0.0127511	0.49317
AT1G29050	1.23812	-1.44651	0.0127523	0.49317
AT2G19680	1.41779	-1.84927	0.0127898	0.49317
AT1G26945	1.22122	-1.91388	0.0127898	0.49317
AT1G32860	-1.05674	-0.524215	0.0128831	0.49317
AT5G22580	-0.971383	-0.289577	0.0128856	0.49317
AT2G42540	2.71918	-3.49626	0.0130169	0.49317
AT2G07733	2.62135	-3.56779	0.0130169	0.49317
AT5G08320	2.62135	-3.56915	0.0130169	0.49317
AT4G31680	-2.59958	-3.64305	0.0130169	0.49317
AT5G14690	-2.59958	-3.63867	0.0130169	0.49317
AT5G18290	-2.59958	-3.63861	0.0130169	0.49317
AT5G49615	-2.59958	-3.64602	0.0130169	0.49317
AT5G60890	2.51641	-3.65152	0.0130169	0.49317
AT5G66070	2.51641	-3.64476	0.0130169	0.49317
AT2G45180	-2.06983	-3.55379	0.0130169	0.49317
AT5G11900	-0.927328	0.661084	0.013071	0.494402
AT1G75380	1.0191	0.617069	0.0131452	0.495598
AT3G22560	-1.14376	-0.835514	0.0131714	0.495598
AT3G23020	1.24468	-1.21412	0.0132205	0.495598
AT4G29100	1.22012	-1.21703	0.0132205	0.495598
AT3G28915	-1.45553	-1.96277	0.0132304	0.495598
AT5G06530	-1.16608	-1.49329	0.013233	0.495598
AT1G42550	1.14782	-0.532361	0.0132746	0.496339
AT4G27450	1.0331	0.176315	0.013472	0.502075
AT3G60960	0.757933	0.143556	0.013472	0.502075
AT2G38400	1.15887	-0.859352	0.0136252	0.506495
AT5G49665	-1.10551	-0.468101	0.0136631	0.506495
AT4G33560	-1.60724	-2.06417	0.0136821	0.506495
AT1G09575	1.43946	-2.0295	0.0136821	0.506495
AT5G57123	-1.12065	-1.28089	0.0137235	0.506495
ATCG01210	1.41717	-1.53278	0.0137461	0.506495
AT4G35780	1.29751	-1.56322	0.0137461	0.506495
AT3G09790	-1.09945	-0.780806	0.0141473	0.520439
AT5G54470	-1.1237	-1.33981	0.014263	0.523849
AT3G06110	-1.29948	-2.20539	0.0145903	0.535008
AT4G21990	-1.01369	0.288128	0.0146295	0.535585
AT3G17460	2.1879	-3.38562	0.0146694	0.536187
AT1G16590	-1.32629	-1.4249	0.0148427	0.537767
AT5G58840	-1.25676	-1.40848	0.0148427	0.537767
AT4G38950	-1.08843	-0.455699	0.0148712	0.537767
ATCG00920	1.36826	-1.71101	0.0148777	0.537767
AT1G68480	-1.35254	-1.7404	0.0148777	0.537767
AT1G78020	-1.35254	-1.73288	0.0148777	0.537767
AT2G18050	1.29996	-1.73142	0.0148777	0.537767
AT1G09440	1.71264	-2.28188	0.0150222	0.541273
AT1G79360	1.46113	-2.40957	0.0150222	0.541273
AT5G18630	1.13528	-1.00346	0.0151847	0.546265
AT1G30530	-0.881312	1.49029	0.0153308	0.550652
AT4G02750	-1.49241	-2.46517	0.0154116	0.550977
AT3G50660	-1.26647	-1.47042	0.0154663	0.550977
AT2G38310	1.20522	-1.83788	0.0155003	0.550977
AT1G18720	2.13645	-3.05949	0.0155331	0.550977
AT5G54010	2.13645	-3.06576	0.0155331	0.550977
AT1G13400	-2.06391	-3.14549	0.0155331	0.550977
AT1G32540	1.89208	-3.21263	0.0155331	0.550977
AT3G26612	1.80047	-3.25741	0.0155331	0.550977
AT5G24860	-1.00125	-0.205713	0.015699	0.553952
AT5G19130	1.19514	-1.24081	0.0157186	0.553952
AT2G01190	1.81277	-2.54841	0.0157243	0.553952
AT3G45640	-1.66623	-2.91034	0.0158848	0.553952
AT3G46680	-2.06023	-2.83715	0.0159084	0.553952
AT1G66890	1.78854	-2.75924	0.0159084	0.553952
AT3G53800	1.78854	-2.76579	0.0159084	0.553952
AT3G07274	1.72221	-2.79838	0.0159084	0.553952
AT3G51510	1.72221	-2.79763	0.0159084	0.553952
AT4G28740	1.72221	-2.78436	0.0159084	0.553952
AT2G02150	-1.59486	-2.74802	0.0159084	0.553952
AT5G40170	-1.59486	-2.74921	0.0159084	0.553952
AT5G25350	0.962906	0.214553	0.0159804	0.555611
AT5G27720	-1.04039	-0.427829	0.0161377	0.560227
AT5G52860	-0.931526	0.902745	0.0162414	0.562971
AT1G19850	-0.787849	2.74835	0.0164323	0.568722
AT4G39790	1.20076	-1.61208	0.0168627	0.581944
AT5G46160	-1.21124	-1.94158	0.0168654	0.581944
AT3G12610	0.951957	-0.3738	0.0169163	0.582301
AT2G45160	-0.887722	0.629156	0.0169268	0.582301
AT1G18270	0.964309	1.13493	0.0171811	0.585109
AT1G26720	3.1304	-3.99311	0.017188	0.585109
AT2G39510	3.1304	-3.99424	0.017188	0.585109
AT5G07430	3.1304	-3.99247	0.017188	0.585109
AT1G31290	-3.07512	-4.0927	0.017188	0.585109
AT3G07820	2.99615	-4.09517	0.017188	0.585109
AT4G17710	2.99615	-4.10916	0.017188	0.585109
AT5G53660	0.877511	0.81989	0.0172578	0.585923
AT5G26000	0.96607	1.50254	0.0172632	0.585923
AT4G05150	0.885366	0.247689	0.0173787	0.588964
AT5G59660	-0.896787	0.727634	0.0174403	0.590176
AT2G27990	-1.44037	-2.07848	0.0176075	0.594952
AT2G42730	-1.22053	-1.67371	0.0176452	0.595342
AT4G16110	1.16182	-1.20427	0.0178632	0.601807
AT4G36750	-0.996259	0.617134	0.0179764	0.604164
AT1G72852	-0.896819	1.14785	0.0179861	0.604164
AT1G70160	-0.772724	0.708018	0.0180776	0.606344
AT3G06590	0.837817	0.563742	0.0182753	0.612004
AT5G66110	1.56236	-2.11226	0.018386	0.612004
AT1G15760	1.43013	-2.16399	0.018386	0.612004
AT1G60060	1.43013	-2.17605	0.018386	0.612004
AT2G32430	1.38321	-2.19596	0.018386	0.612004
AT2G38820	1.06659	-0.536257	0.0184342	0.612004
AT1G23900	-0.941044	-0.544075	0.0184342	0.612004
AT2G27200	1.29996	-1.74352	0.0184909	0.612105
AT2G25690	-1.26641	-1.72878	0.0184909	0.612105
AT1G30282	-0.901133	0.461508	0.0185482	0.613113
AT1G80180	0.913169	0.190264	0.0186643	0.616057
AT5G08640	-0.732206	2.627	0.0187256	0.617187
AT4G14100	0.855939	0.351277	0.0188516	0.620442
AT2G02710	1.00646	0.0705624	0.0189909	0.622806
AT2G47240	-0.772136	2.77855	0.0190543	0.622806
AT3G60440	-1.50636	-2.3022	0.019194	0.622806
AT4G09170	1.46907	-2.27786	0.019194	0.622806
AT5G41480	-1.37211	-2.27425	0.019194	0.622806
AT4G14290	1.21554	-1.08937	0.0192704	0.622806
AT3G19000	-0.976433	-0.493469	0.0193117	0.622806
AT1G79700	0.964769	-0.0940815	0.0193507	0.622806
AT3G26470	-0.931063	-0.0921259	0.0193507	0.622806
AT2G31751	0.617542	4.16711	0.0194174	0.622806
AT3G24020	-0.85222	0.682123	0.0195038	0.622806
AT1G24250	5.023	-4.57305	0.0196334	0.622806
AT4G12920	5.023	-4.57305	0.0196334	0.622806
AT1G10540	-4.87962	-4.74414	0.0196334	0.622806
AT1G18390	-4.87962	-4.74296	0.0196334	0.622806
AT1G47610	-4.87962	-4.74179	0.0196334	0.622806
AT1G71691	-4.87962	-4.74179	0.0196334	0.622806
AT2G16740	-4.87962	-4.74655	0.0196334	0.622806
AT3G02125	-4.87962	-4.74535	0.0196334	0.622806
AT3G28153	-4.87962	-4.74421	0.0196334	0.622806
AT5G62980	-4.87962	-4.74302	0.0196334	0.622806
AT1G05385	4.83668	-4.75565	0.0196334	0.622806
AT2G44290	4.83668	-4.75545	0.0196334	0.622806
AT3G17620	4.83668	-4.73982	0.0196334	0.622806
AT5G07640	4.83668	-4.74755	0.0196334	0.622806
AT1G36580	4.62268	-4.95198	0.0196334	0.622806
AT1G73370	-0.918542	0.664448	0.0198787	0.629714
AT5G06839	1.56705	-2.37058	0.020019	0.6324
AT1G54010	-1.54845	-2.41832	0.020019	0.6324
AT1G70290	0.874845	1.54659	0.0200478	0.632434
AT1G19660	0.990545	0.85128	0.0202497	0.634135
AT3G10800	1.04731	-0.754587	0.0203675	0.634135
AT3G10000	-1.35059	-1.92084	0.020395	0.634135
AT4G26770	-1.35059	-1.92689	0.020395	0.634135
AT1G11120	-1.16116	-1.8874	0.020395	0.634135
AT5G02370	0.646471	8.79441	0.020478	0.634135
AT5G61340	-1.25676	-1.39539	0.020502	0.634135
AT5G56544	0.807549	4.0891	0.0205433	0.634135
AT4G14320	0.892471	-0.0726857	0.0205761	0.634135
AT5G65780	1.06843	-1.04333	0.0206098	0.634135
AT5G53390	-1.2119	-1.60248	0.0206606	0.634135
AT5G10695	0.811126	0.370722	0.0207074	0.634135
AT1G07985	2.51641	-3.66593	0.0207134	0.634135
AT1G62570	2.51641	-3.66727	0.0207134	0.634135
AT5G02680	2.51641	-3.65997	0.0207134	0.634135
AT5G09225	2.51641	-3.66837	0.0207134	0.634135
AT5G14740	2.51641	-3.67391	0.0207134	0.634135
AT5G62780	-2.48634	-3.73565	0.0207134	0.634135
AT1G29418	2.40324	-3.74172	0.0207134	0.634135
AT3G18950	2.40324	-3.74933	0.0207134	0.634135
AT5G27760	2.40324	-3.73452	0.0207134	0.634135
AT5G47540	2.40324	-3.75018	0.0207134	0.634135
AT3G13750	0.875848	1.6788	0.0208293	0.635426
AT5G50360	1.68019	-2.46737	0.0208391	0.635426
AT4G28556	1.51195	-2.53804	0.0208391	0.635426
AT1G79420	0.84986	-0.326054	0.0210615	0.641348
AT5G25610	0.833072	2.08491	0.0212896	0.647431
AT1G75230	0.873286	-0.718596	0.0214032	0.650019
AT1G04250	-1.66121	-2.70092	0.0216179	0.653241
AT4G29420	1.63771	-2.66882	0.0216179	0.653241
AT3G53350	-1.47489	-2.65737	0.0216179	0.653241
AT3G21750	-0.791411	2.58634	0.0216348	0.653241
AT4G21970	0.983963	-0.505935	0.0216525	0.653241
AT1G20150	1.34729	-1.65219	0.0217539	0.654568
AT1G60630	-1.26641	-1.70083	0.0217539	0.654568
AT4G00820	-0.901446	0.0726995	0.0218197	0.655684
AT5G24780	-0.760341	3.14179	0.0219113	0.657569
AT3G22790	-0.769717	2.62035	0.0221716	0.660322
AT2G05380	0.940938	0.745671	0.022212	0.660322
AT4G39190	-1.0587	-0.736889	0.0222821	0.660322
AT4G15850	1.78854	-2.78035	0.022295	0.660322
AT1G68610	1.65268	-2.84106	0.022295	0.660322
ATCG01090	1.65268	-2.85966	0.022295	0.660322
AT2G02370	-1.5253	-2.80321	0.022295	0.660322
AT2G28680	2.27951	-3.33729	0.0223504	0.660322
AT2G42510	2.1879	-3.40815	0.0223504	0.660322
AT1G75000	-2.17482	-3.45522	0.0223504	0.660322
AT5G58690	-2.17482	-3.45957	0.0223504	0.660322
AT1G78590	2.09008	-3.47456	0.0223504	0.660322
AT2G18510	-0.951732	-0.63235	0.0223969	0.660839
AT5G61770	-0.973281	-0.543741	0.0224732	0.662233
AT2G34990	1.30723	-2.12556	0.0226206	0.66547
AT5G05100	0.927188	0.351938	0.0227177	0.66547
AT4G16447	-1.84062	-3.02357	0.0227711	0.66547
AT3G14370	1.83134	-2.9788	0.0227711	0.66547
AT3G17670	1.83134	-2.99059	0.0227711	0.66547
AT5G20630	2.0595	-3.13109	0.0228813	0.66547
AT1G52230	1.97822	-3.1745	0.0228813	0.66547
AT5G06300	1.97822	-3.17349	0.0228813	0.66547
AT3G27416	-1.97773	-3.22982	0.0228813	0.66547
AT3G01600	-1.67312	-3.16419	0.0228813	0.66547
AT2G22420	-0.800731	0.196439	0.022904	0.66547
AT3G14415	0.99325	-0.895382	0.0230936	0.670127
AT3G15190	0.76671	0.872625	0.0231581	0.671144
AT3G21540	-0.900419	-0.1783	0.023253	0.672612
AT5G38890	1.06777	-1.35112	0.0232962	0.672612
AT4G29080	-0.932373	-0.249571	0.0232972	0.672612
AT4G36480	-0.929133	-0.484448	0.023364	0.673686
AT1G07910	-0.961721	-1.17438	0.0237112	0.682836
AT2G19090	-0.887337	-0.0609671	0.0238565	0.684417
AT1G30490	-0.865057	-0.0618953	0.0238565	0.684417
AT2G24540	1.28454	-2.24762	0.0238655	0.684417
AT1G30210	1.25139	-1.54478	0.0239162	0.684417
AT4G36120	1.15676	-1.5797	0.0239162	0.684417
AT4G01270	-0.991309	-1.05714	0.0239815	0.685427
AT3G61420	1.28269	-1.85284	0.0242575	0.691788
AT5G60680	0.918563	-0.52239	0.0242648	0.691788
AT5G39850	1.0424	-1.42086	0.0245402	0.698767
AT1G01060	-0.740443	1.31283	0.0246629	0.701387
AT4G20030	-1.06462	-1.24707	0.0249327	0.707294
AT4G19865	1.05919	-1.25219	0.0249327	0.707294
AT2G29970	-0.852632	-0.367994	0.025045	0.709597
AT5G21940	0.821077	2.26559	0.0251125	0.710407
AT1G32470	1.09564	-1.08751	0.025167	0.710407
AT3G49360	1.02438	-1.11067	0.025167	0.710407
AT5G45040	0.796037	-0.0579917	0.0252497	0.711861
AT1G21250	-1.01598	-0.973975	0.025292	0.712173
AT4G29030	-0.710811	2.70983	0.0254388	0.715423
AT2G24700	-0.762021	1.88805	0.0256602	0.720761
AT4G39800	-0.776297	1.00346	0.0258537	0.724749
AT2G24120	0.907889	-0.00663708	0.0258754	0.724749
AT5G13500	1.10876	-1.4724	0.0259038	0.724749
AT3G15450	0.838103	3.68604	0.0259293	0.724749
AT3G27850	1.00193	-0.577141	0.0262583	0.731514
AT1G31310	0.831328	0.280736	0.026266	0.731514
AT2G46600	1.09066	-1.3031	0.0262675	0.731514
AT3G01142	-0.757462	1.88396	0.0263379	0.731841
AT3G13445	0.899022	0.691155	0.0263462	0.731841
AT4G03030	0.951137	-0.688852	0.0263755	0.731841
AT5G17760	1.04731	-0.773809	0.0264691	0.732655
AT4G31115	0.889593	-0.80469	0.0264691	0.732655
AT2G47460	-0.914176	-0.89496	0.026527	0.733367
AT1G53480	0.656792	2.45097	0.0266136	0.734191
AT3G16280	-1.49241	-2.45287	0.0266212	0.734191
AT4G15430	1.24834	-1.70663	0.02678	0.735015
AT1G26680	-1.23011	-1.72999	0.02678	0.735015
AT1G31550	-1.23011	-1.73243	0.02678	0.735015
AT1G67880	-1.14882	-1.72484	0.02678	0.735015
AT4G04630	-0.849285	-0.0919009	0.0268923	0.73721
AT2G07690	-0.952705	0.388347	0.0270307	0.740117
AT3G57965	1.06175	-0.507654	0.0271777	0.742216
AT4G21280	0.935193	-0.53419	0.0271777	0.742216
AT1G71810	1.36773	-2.01017	0.0272701	0.742216
AT4G30060	1.28348	-2.04589	0.0272701	0.742216
AT1G56310	-1.12443	-2.0041	0.0272701	0.742216
AT1G80910	0.729568	1.82648	0.0273361	0.743125
AT3G28570	1.23812	-1.49147	0.0274029	0.744053
AT2G31380	-0.865176	1.38639	0.0274427	0.744249
AT3G09250	-1.0402	-0.484013	0.0280556	0.759967
AT2G31910	-1.53833	-2.58449	0.0281138	0.76064
AT4G38470	0.96311	0.150021	0.0281968	0.761982
AT4G28250	-0.938619	-0.5695	0.0283038	0.763761
AT5G43935	-1.24078	-1.81888	0.0284365	0.763761
AT4G21740	-0.898317	-0.336885	0.0285994	0.763761
AT1G09970	-0.760473	0.728178	0.0286003	0.763761
AT1G07140	-0.788822	0.440042	0.0286153	0.763761
AT4G26290	0.897327	0.0250809	0.0287568	0.763761
AT5G66470	-0.852866	-0.753101	0.0287903	0.763761
AT1G15210	-1.34799	-2.14843	0.0290045	0.763761
AT4G28025	1.26032	-2.16192	0.0290045	0.763761
AT3G55120	-1.03557	-1.58645	0.0290558	0.763761
AT4G36820	2.99615	-4.11651	0.0290663	0.763761
AT1G04660	-2.92696	-4.22775	0.0290663	0.763761
AT1G14686	-2.92696	-4.22363	0.0290663	0.763761
AT1G63720	-2.92696	-4.22775	0.0290663	0.763761
AT2G41905	-2.92696	-4.23126	0.0290663	0.763761
AT5G11930	-2.92696	-4.23346	0.0290663	0.763761
AT1G52430	2.84811	-4.23788	0.0290663	0.763761
AT2G07772	2.84811	-4.23018	0.0290663	0.763761
AT3G28590	2.84811	-4.22159	0.0290663	0.763761
AT3G59580	2.84811	-4.22884	0.0290663	0.763761
AT4G35985	2.84811	-4.22913	0.0290663	0.763761
AT5G47610	2.84811	-4.23672	0.0290663	0.763761
AT1G53260	2.68312	-4.36348	0.0290663	0.763761
AT5G40410	2.68312	-4.36457	0.0290663	0.763761
AT2G15230	1.07261	-1.42587	0.029338	0.770012
AT1G02720	-0.966159	-0.111317	0.0293824	0.770124
AT3G51160	-1.15158	-1.2767	0.0294098	0.770124
AT3G56030	0.899143	-0.606665	0.0295114	0.771899
AT1G80580	-2.06023	-2.81672	0.0296484	0.772823
AT2G31730	-1.59486	-2.74361	0.0296484	0.772823
AT2G37180	1.5743	-2.71411	0.0296484	0.772823
AT1G77992	-0.904756	0.238107	0.0297659	0.775001
AT5G11250	-1.25277	-1.89628	0.0302706	0.787242
AT3G52430	-0.858156	0.638678	0.0307689	0.796672
AT1G03440	0.749335	0.379503	0.030849	0.796672
AT1G57680	0.99542	-0.388129	0.0308653	0.796672
AT4G14810	1.29751	-1.61172	0.0308843	0.796672
AT3G23370	-1.18512	-1.68282	0.0308843	0.796672
AT5G43730	-1.10818	-1.66746	0.0308843	0.796672
AT2G02955	1.09706	-1.68956	0.0308843	0.796672
ATCG00440	1.38321	-2.22681	0.0309126	0.796672
AT5G40140	-1.0119	-1.17761	0.0309558	0.796884
AT5G05240	-1.20407	-1.5179	0.0311103	0.799593
AT1G10520	-1.45222	-2.86159	0.0311662	0.799593
AT1G14140	-1.45222	-2.85857	0.0311662	0.799593
AT1G36940	-1.00713	-0.497072	0.0312898	0.801863
AT5G37300	-0.844057	0.114652	0.0313685	0.802978
AT3G22550	-0.76565	0.209162	0.0314883	0.804557
AT4G30530	-0.730454	0.69501	0.0315008	0.804557
AT2G25900	0.75926	2.46155	0.0315686	0.805387
AT3G10960	-0.767757	2.328	0.0319709	0.813735
AT1G72600	0.699876	6.23486	0.0319772	0.813735
AT4G37040	0.904563	-0.977328	0.0320028	0.813735
AT3G04970	1.22122	-1.96952	0.0323071	0.815718
AT2G01600	1.02208	-1.08696	0.0323811	0.815718
AT3G49220	-0.823502	-0.294251	0.0323824	0.815718
AT1G05810	1.83134	-2.99707	0.0325577	0.815718
AT4G11530	-1.7593	-3.08304	0.0325577	0.815718
AT4G09550	1.67311	-3.09948	0.0325577	0.815718
AT1G78980	-1.50793	-3.03113	0.0325577	0.815718
AT3G50440	0.795392	-0.190841	0.032574	0.815718
AT4G14385	1.24834	-1.71903	0.0329138	0.815718
AT5G07320	1.14209	-1.75932	0.0329138	0.815718
AT2G18115	2.40324	-3.77143	0.0329258	0.815718
AT2G20470	2.40324	-3.77261	0.0329258	0.815718
AT4G14010	2.40324	-3.75668	0.0329258	0.815718
AT5G63990	2.40324	-3.76372	0.0329258	0.815718
AT1G03820	-2.36344	-3.8509	0.0329258	0.815718
AT1G18320	-2.36344	-3.85413	0.0329258	0.815718
AT2G12170	-2.36344	-3.85092	0.0329258	0.815718
AT3G12502	-2.36344	-3.84969	0.0329258	0.815718
AT5G47550	-2.36344	-3.84449	0.0329258	0.815718
AT1G23530	2.14617	-3.94719	0.0329258	0.815718
AT4G37608	0.666731	2.82371	0.0329598	0.815718
AT3G14930	1.06777	-1.37346	0.0329678	0.815718
AT2G32280	-1.40041	-2.38064	0.0330107	0.815718
AT1G13040	-1.26616	-2.35356	0.0330107	0.815718
AT4G27750	-1.26616	-2.34035	0.0330107	0.815718
AT5G20410	-1.26616	-2.34749	0.0330107	0.815718
AT3G53090	0.885454	-0.251078	0.0330906	0.816808
AT5G50570	0.91679	-0.608913	0.0331471	0.817317
AT1G14910	0.746686	-0.156233	0.0332203	0.817542
AT4G36180	-0.711764	1.86511	0.033255	0.817542
AT4G38580	1.97822	-3.19503	0.0336209	0.817542
AT1G24530	1.89208	-3.25577	0.0336209	0.817542
AT5G24310	1.89208	-3.2427	0.0336209	0.817542
AT4G14590	1.80047	-3.30808	0.0336209	0.817542
AT5G19520	1.70265	-3.34844	0.0336209	0.817542
AT1G30650	-1.58147	-3.23658	0.0336209	0.817542
AT2G17770	-0.778287	1.01035	0.0336536	0.817542
AT5G24500	0.694252	3.69495	0.033655	0.817542
AT3G25710	-0.927663	-0.712215	0.0337091	0.817542
AT1G53300	-0.755905	0.440884	0.0337916	0.817542
AT4G18020	-0.772724	0.734983	0.0339486	0.817542
AT3G05880	2.09008	-3.48152	0.0339806	0.817542
AT3G53860	2.09008	-3.48073	0.0339806	0.817542
AT2G28610	-2.06983	-3.54557	0.0339806	0.817542
AT1G07000	1.98514	-3.54432	0.0339806	0.817542
AT4G17790	1.98514	-3.55057	0.0339806	0.817542
AT5G64660	1.98514	-3.56003	0.0339806	0.817542
AT5G41170	1.87196	-3.62686	0.0339806	0.817542
AT5G62630	1.74915	-3.70295	0.0339806	0.817542
AT2G40120	-1.6832	-3.47184	0.0339806	0.817542
AT3G15300	-1.6832	-3.46635	0.0339806	0.817542
AT2G14520	-1.28174	-2.07806	0.0345749	0.82808
AT3G61220	-1.1768	-2.07384	0.0345749	0.82808
AT2G43130	-1.07898	-2.03726	0.0345749	0.82808
AT3G51320	-1.07898	-2.04479	0.0345749	0.82808
AT3G13060	-0.670358	1.29962	0.0348459	0.82808
AT4G34190	0.99325	-0.919981	0.0349152	0.82808
AT3G16410	-0.910303	-0.931475	0.0349152	0.82808
AT3G46580	-0.889879	-0.0191888	0.0350084	0.82808
AT2G44255	0.839498	-0.0120216	0.0350084	0.82808
AT1G13270	1.0424	-1.44513	0.0350273	0.82808
AT3G26910	1.0424	-1.44591	0.0350273	0.82808
AT3G05910	0.790519	-0.129535	0.0350371	0.82808
AT1G54050	-1.20152	-1.8462	0.0351744	0.82808
AT5G02150	1.15282	-1.82728	0.0351744	0.82808
AT1G64770	1.12379	-1.61249	0.0352462	0.82808
AT4G22930	1.46113	-2.44865	0.0353124	0.82808
AT4G38400	1.46113	-2.44772	0.0353124	0.82808
AT4G33150	0.969819	-0.737404	0.0353341	0.82808
AT2G38540	0.737373	1.47246	0.0354023	0.82808
AT5G14780	0.996938	-1.05103	0.0355468	0.82808
AT5G45100	0.890722	-0.436109	0.0356727	0.82808
AT1G47230	0.767447	-0.196555	0.0356845	0.82808
AT3G10410	0.889975	0.760972	0.0361043	0.82808
AT1G47655	-1.20578	-1.22516	0.0361789	0.82808
AT3G53460	0.767247	2.9162	0.0363619	0.82808
AT1G72210	-0.909511	-0.526825	0.0364098	0.82808
AT3G10480	-0.83135	0.556505	0.0365849	0.82808
AT1G24610	0.933001	0.11657	0.036598	0.82808
AT1G64710	0.735409	0.48606	0.0367622	0.82808
AT4G35880	-1.00798	-1.33796	0.0367834	0.82808
AT3G61440	0.748943	1.81898	0.0368167	0.82808
AT3G12915	-0.884378	0.871029	0.0368404	0.82808
AT1G02900	4.83668	-4.76351	0.0368512	0.82808
AT1G23810	4.83668	-4.76351	0.0368512	0.82808
AT1G28375	4.83668	-4.76351	0.0368512	0.82808
AT1G29395	4.83668	-4.76321	0.0368512	0.82808
AT1G32780	4.83668	-4.76351	0.0368512	0.82808
AT2G21430	4.83668	-4.76351	0.0368512	0.82808
AT3G58280	4.83668	-4.76351	0.0368512	0.82808
AT5G17830	4.83668	-4.76351	0.0368512	0.82808
AT5G42900	4.83668	-4.76351	0.0368512	0.82808
AT5G59820	4.83668	-4.76331	0.0368512	0.82808
AT1G32560	-4.66537	-4.96636	0.0368512	0.82808
AT1G37140	-4.66537	-4.96758	0.0368512	0.82808
AT1G50590	-4.66537	-4.96634	0.0368512	0.82808
AT2G24860	-4.66537	-4.96514	0.0368512	0.82808
AT2G31480	-4.66537	-4.96267	0.0368512	0.82808
AT2G43510	-4.66537	-4.96394	0.0368512	0.82808
AT2G44798	-4.66537	-4.96514	0.0368512	0.82808
AT3G05370	-4.66537	-4.96516	0.0368512	0.82808
AT3G12450	-4.66537	-4.96389	0.0368512	0.82808
AT3G26120	-4.66537	-4.96518	0.0368512	0.82808
AT3G47110	-4.66537	-4.96758	0.0368512	0.82808
AT4G00210	-4.66537	-4.9676	0.0368512	0.82808
AT4G23720	-4.66537	-4.96518	0.0368512	0.82808
AT4G24980	-4.66537	-4.96274	0.0368512	0.82808
AT4G31355	-4.66537	-4.96274	0.0368512	0.82808
AT5G24160	-4.66537	-4.96636	0.0368512	0.82808
AT5G47445	-4.66537	-4.96514	0.0368512	0.82808
AT5G56320	-4.66537	-4.96518	0.0368512	0.82808
AT1G01340	4.62268	-4.95983	0.0368512	0.82808
AT1G67810	4.62268	-4.95994	0.0368512	0.82808
AT1G80520	4.62268	-4.97563	0.0368512	0.82808
AT2G20825	4.62268	-4.96796	0.0368512	0.82808
AT2G22390	4.62268	-4.97553	0.0368512	0.82808
AT2G32487	4.62268	-4.97543	0.0368512	0.82808
AT5G08150	4.62268	-4.97532	0.0368512	0.82808
AT4G24540	-0.902931	-0.117399	0.0368978	0.828312
AT1G77280	-1.18631	-2.16835	0.0371077	0.831386
AT1G52240	1.10966	-2.21927	0.0371077	0.831386
AT5G53905	0.867047	0.0414503	0.0372774	0.832738
AT1G55060	-1.1023	-1.52363	0.03731	0.832738
AT4G29150	-1.1023	-1.52803	0.03731	0.832738
AT1G68670	0.928012	-0.158778	0.0376487	0.832738
AT1G11390	1.20076	-1.65938	0.0376698	0.832738
AT5G10390	-1.14882	-1.70061	0.0376698	0.832738
AT5G50210	1.13246	-1.69055	0.0376698	0.832738
AT1G12140	1.02354	-1.7234	0.0376698	0.832738
AT3G21640	-1.21124	-1.92241	0.0377019	0.832738
AT3G52115	-1.21124	-1.93046	0.0377019	0.832738
AT3G45610	1.16486	-1.91136	0.0377019	0.832738
AT3G04020	1.51195	-2.58395	0.0378252	0.832738
AT5G10380	-1.47489	-2.63163	0.0378252	0.832738
AT4G27710	1.4512	-2.6188	0.0378252	0.832738
AT2G24570	-1.3099	-2.60161	0.0378252	0.832738
AT3G66654	-1.3099	-2.60812	0.0378252	0.832738
AT4G38960	-1.3099	-2.61043	0.0378252	0.832738
ATCG00350	-1.3099	-2.60372	0.0378252	0.832738
AT2G35860	-0.932586	-0.911005	0.0379394	0.834448
AT5G48485	-0.762821	1.22345	0.0380833	0.836806
AT5G12950	-1.03727	-1.25244	0.0383639	0.840542
AT5G23340	1.0295	-1.23266	0.0383639	0.840542
AT2G43310	0.921081	-1.26454	0.0383639	0.840542
AT2G23120	0.753891	1.66497	0.0385246	0.843253
AT5G03740	-0.72103	0.386255	0.0389884	0.852586
AT2G21660	0.851405	0.587888	0.0391104	0.85431
AT1G69340	1.03877	-1.39786	0.0391422	0.85431
AT5G62210	-0.959992	-0.46518	0.0396041	0.863567
AT1G25250	-1.25509	-1.61809	0.0398491	0.864361
AT2G17033	1.14745	-1.55203	0.0398491	0.864361
AT1G55120	-1.32011	-2.28883	0.0399437	0.864361
AT1G77770	-1.32011	-2.29619	0.0399437	0.864361
AT5G16890	-1.32011	-2.29621	0.0399437	0.864361
AT2G37678	1.28454	-2.28337	0.0399437	0.864361
AT1G15060	-1.19729	-2.26821	0.0399437	0.864361
AT4G05090	1.17862	-2.32434	0.0399437	0.864361
AT5G08760	0.860502	-0.957188	0.0400037	0.864838
AT1G66180	0.831713	-0.11623	0.0402157	0.86582
AT1G26900	1.14209	-1.76541	0.0403802	0.86582
AT5G46460	-1.07336	-1.77344	0.0403802	0.86582
AT1G18330	1.26274	-1.9769	0.0405389	0.86582
AT4G08230	1.13443	-2.01939	0.0405389	0.86582
AT3G24010	-1.12443	-1.99662	0.0405389	0.86582
AT4G34555	-1.12443	-2.00574	0.0405389	0.86582
AT5G17620	-1.12443	-1.99534	0.0405389	0.86582
AT1G28700	1.63771	-2.68561	0.0405426	0.86582
AT4G24710	-1.5253	-2.78463	0.0405426	0.86582
AT3G58850	1.50796	-2.75595	0.0405426	0.86582
AT4G20430	1.50796	-2.76133	0.0405426	0.86582
AT5G44020	1.50796	-2.75552	0.0405426	0.86582
AT5G17010	-0.813778	-0.537253	0.040621	0.866683
AT3G58770	-1.03879	-0.884906	0.0410708	0.874909
AT1G26780	0.901128	-1.07812	0.0410833	0.874909
AT1G80440	0.881412	0.458335	0.0411571	0.875663
AT1G20670	0.797004	0.48644	0.0414947	0.882024
AT2G24320	-0.953542	-0.313758	0.0416088	0.883545
AT1G05560	-0.711939	2.61743	0.0417032	0.883545
AT2G02090	0.816691	-0.140111	0.0417149	0.883545
AT2G43210	0.91679	-0.634545	0.0417347	0.883545
AT1G30000	-0.944055	-1.44856	0.04176	0.883545
AT5G18460	-0.828347	-0.431731	0.0420644	0.889161
AT1G68520	1.10053	-1.16929	0.0422341	0.891923
AT3G07360	-0.683738	0.330026	0.0424066	0.894735
AT4G26080	0.80363	0.24725	0.0429209	0.904051
AT5G45010	-0.818311	-0.731096	0.0429579	0.904051
AT3G21465	1.31297	-2.4061	0.0431267	0.904051
AT3G51480	-1.21012	-2.38138	0.0431267	0.904051
AT4G14680	-1.0873	-2.35953	0.0431267	0.904051
AT5G08350	0.707563	-0.0237041	0.0432063	0.904051
AT3G60340	0.80371	-0.524148	0.0432566	0.904051
AT3G56880	1.15282	-1.84979	0.0434241	0.904051
AT1G65060	-1.07502	-1.85736	0.0434241	0.904051
AT4G21680	-1.84062	-3.01088	0.0434299	0.904051
AT1G15330	1.72221	-2.83681	0.0434299	0.904051
AT3G48700	-1.58925	-2.97112	0.0434299	0.904051
AT2G39050	-1.37525	-2.91284	0.0434299	0.904051
AT4G10770	-1.37525	-2.91702	0.0434299	0.904051
AT5G11070	1.03543	-1.35177	0.0434427	0.904051
AT1G51200	0.949633	-1.1207	0.0435441	0.904511
AT5G48560	-0.939109	-1.11952	0.0435441	0.904511
AT1G66750	-1.34799	-2.14583	0.0437364	0.906855
AT4G34020	1.23943	-2.08217	0.0437364	0.906855
AT5G24490	0.711461	3.03173	0.0437767	0.906865
AT2G31390	-0.696493	1.11419	0.0442402	0.915636
AT1G51460	-0.755732	0.754694	0.0446153	0.922562
AT1G11960	-1.06932	-1.54826	0.0446759	0.922977
AT3G45100	1.00315	-1.2545	0.0449307	0.925727
AT3G24040	0.976307	-1.25808	0.0449307	0.925727
AT5G53890	-0.90347	-1.2563	0.0449307	0.925727
AT3G15460	0.657084	6.76549	0.0450664	0.927686
AT5G57685	-0.900602	-0.785386	0.0452	0.929596
AT1G49600	0.742169	0.163628	0.0452796	0.929773
AT5G57380	0.764212	-0.563303	0.0452901	0.929773
AT2G33360	0.950343	-0.9529	0.0457899	0.937492
AT1G71260	1.13246	-1.70233	0.0458631	0.937492
AT3G15430	1.13246	-1.70566	0.0458631	0.937492
AT3G56430	1.09706	-1.70956	0.0458631	0.937492
AT5G10680	-0.935368	-1.17553	0.0462522	0.937492
AT1G13100	-1.67312	-3.14613	0.0463957	0.937492
AT1G48330	-1.67312	-3.15043	0.0463957	0.937492
AT2G22270	-1.67312	-3.15749	0.0463957	0.937492
ATCG00610	-1.67312	-3.1603	0.0463957	0.937492
AT1G76170	1.67311	-3.11215	0.0463957	0.937492
AT2G42830	1.67311	-3.11767	0.0463957	0.937492
AT4G35600	1.67311	-3.11998	0.0463957	0.937492
AT5G05110	1.67311	-3.1124	0.0463957	0.937492
AT1G32260	1.58698	-3.16467	0.0463957	0.937492
AT3G13682	1.58698	-3.15756	0.0463957	0.937492
AT5G55640	1.58698	-3.1568	0.0463957	0.937492
AT1G11330	-1.03634	-1.4373	0.046406	0.937492
AT5G22460	0.916575	-1.43921	0.046406	0.937492
AT2G19810	0.818767	0.306186	0.0466502	0.940195
AT2G17260	-1.37334	-2.54063	0.0467047	0.940195
AT5G14960	-1.37334	-2.5416	0.0467047	0.940195
AT4G29440	-1.2253	-2.51339	0.0467047	0.940195
AT3G41768	0.779055	2.95885	0.0468051	0.940787
AT3G03120	-1.26631	-1.97494	0.0468578	0.940787
AT1G22160	-1.16849	-1.9559	0.0468578	0.940787
AT5G48180	0.750841	1.49036	0.0470833	0.944481
AT3G15940	-0.728787	0.360655	0.0472586	0.947166
AT5G06130	1.21183	-2.19911	0.0473558	0.948281
AT2G04740	0.808052	-0.825033	0.0476354	0.952584
AT4G37230	-0.810237	-0.346556	0.0477135	0.952584
AT4G19410	0.824908	0.259892	0.0477635	0.952584
AT3G59950	0.670588	2.64796	0.047826	0.952584
AT4G32980	-0.82486	-1.27742	0.0479165	0.952584
AT3G05270	-1.14359	-1.61842	0.0479365	0.952584
AT3G16090	-1.00101	-1.59999	0.0479365	0.952584
AT5G11470	-1.00101	-1.60376	0.0479365	0.952584
AT5G52060	-0.817859	-0.053446	0.0485414	0.952584

## Sheet: Table4_35S-HEC-GFP_ChIP-seq
PeakID (cmd=annotatePeaks.pl /Users/Christoph/Desktop/HEC1_ChIP-seq/Analysis_ChIP-seq/9th_analysis/5_Homer/HEC1_keep-dup2_multi tair10)	Chr	Start	End	Strand	Peak Score	Focus Ratio/Region Size	Annotation	Detailed Annotation	Distance to TSS	Nearest PromoterID	Entrez ID	Nearest Unigene	Nearest Refseq	Nearest Ensembl	Gene Name	Gene Alias	Gene Description	Gene Type
211	1	2691142	2691314	+	0	NA	3' UTR (AT1G08510.1, exon 6 of 6)	3' UTR (AT1G08510.1, exon 6 of 6)	2212	AT1G08500.1	837371	At.10756	NM_100723		ENODL18	AtENODL18|T27G7.18|T27G7_18|early nodulin-like protein 18	early nodulin-like protein 18	protein-coding
216	1	2753211	2753405	+	0	NA	3' UTR (AT1G08650.1, exon 2 of 2)	3' UTR (AT1G08650.1, exon 2 of 2)	1152	AT1G08650.1	837387	At.46809	NM_100738		PPCK1	ATPPCK1|PHOSPHOENOLPYRUVATE CARBOXYLASE KINASE|PHOSPHOENOLPYRUVATE CARBOXYLASE KINASE 1|phosphoenolpyruvate carboxylase kinase 1	phosphoenolpyruvate carboxylase kinase 1	protein-coding
327	1	4528861	4529019	+	0	NA	3' UTR (AT1G13250.1, exon 1 of 1)	3' UTR (AT1G13250.1, exon 1 of 1)	1123	AT1G13250.1	837885	At.22620	NM_101196		GATL3	T6J4.1|T6J4_1|galacturonosyltransferase-like 3	putative galacturonosyltransferase-like 3	protein-coding
401	1	5128486	5128674	+	0	NA	3' UTR (AT1G14870.1, exon 4 of 4)	3' UTR (AT1G14870.1, exon 4 of 4)	943	AT1G14870.1	838052	At.43506	NM_101356		PCR2	F10B6.27|F10B6_27|PLANT CADMIUM RESISTANCE 2	cadmium resistance protein 2	protein-coding
497	1	6390985	6391159	+	0	NA	3' UTR (AT1G18570.1, exon 3 of 3)	3' UTR (AT1G18570.1, exon 3 of 3)	1661	AT1G18570.1	838438	At.10908	NM_101715		MYB51	AtMYB51|BW51A|BW51B|F25I16.9|F25I16_9|HIG1|HIGH INDOLIC GLUCOSINOLATE 1|myb domain protein 51	myb domain protein 51	protein-coding
505	1	6452913	6453112	+	0	NA	3' UTR (AT1G18710.1, exon 3 of 3)	3' UTR (AT1G18710.1, exon 3 of 3)	2418	AT1G18710.1	838453	At.10906	NM_101729		MYB47	AtMYB47|F6A14.18|F6A14_18|myb domain protein 47	myb domain protein 47	protein-coding
554	1	6946969	6947128	+	0	NA	3' UTR (AT1G20030.2, exon 3 of 3)	3' UTR (AT1G20030.2, exon 3 of 3)	1353	AT1G20030.1	838592	At.19670	NM_101858		AT1G20030	T20H2.19|T20H2_19	pathogenesis-related thaumatin-like protein	protein-coding
680	1	8181348	8181533	+	0	NA	3' UTR (AT1G23080.2, exon 3 of 3)	3' UTR (AT1G23080.2, exon 3 of 3)	2130	AT1G23080.2	838916	At.10543	NM_102156		PIN7	ARABIDOPSIS PIN-FORMED 7|ATPIN7|PIN-FORMED 7|T26J12.14|T26J12_14	auxin efflux carrier component 7	protein-coding
843	1	10247877	10248060	+	0	NA	3' UTR (AT1G29300.1, exon 1 of 1)	3' UTR (AT1G29300.1, exon 1 of 1)	1626	AT1G29300.1	839804	At.40767	NM_102670		UNE1	F28N24.3|F28N24_3|unfertilized embryo sac 1	hypothetical protein	protein-coding
949	1	12127572	12127755	+	0	NA	3' UTR (AT1G33440.1, exon 5 of 5)	3' UTR (AT1G33440.1, exon 5 of 5)	-1182	AT1G33430.2	840236	At.69763	NM_103068		AT1G33430	F10C21.10|F10C21_10	putative beta-1,3-galactosyltransferase 8	protein-coding
1047	1	18321523	18321559	+	0	NA	3' UTR (AT1G49500.1, exon 1 of 1)	3' UTR (AT1G49500.1, exon 1 of 1)	743	AT1G49500.1	841374	At.23092	NM_103838		AT1G49500	F13F21.6|F13F21_6	hypothetical protein	protein-coding
1152	1	20336492	20336646	+	0	NA	3' UTR (AT1G54450.1, exon 11 of 11)	3' UTR (AT1G54450.1, exon 11 of 11)	2966	AT1G54450.1	841887	At.37213	NM_104323		AT1G54450	F20D21.27|F20D21_27	calcium-binding EF-hand-containing protein	protein-coding
1313	1	23776556	23776692	+	0	NA	3' UTR (AT1G64060.1, exon 14 of 14)	3' UTR (AT1G64060.1, exon 14 of 14)	-1729	AT1G64065.1	2745848	At.36052	NM_202357		AT1G64065	-	late embryogenesis abundant hydroxyproline-rich glycoprotein	protein-coding
1367	1	24515940	24516100	+	0	NA	3' UTR (AT1G65900.1, exon 11 of 11)	3' UTR (AT1G65900.1, exon 11 of 11)	-1361	AT1G65890.1	842901	At.26580	NM_105261		AAE12	F12P19.6|F12P19_6|acyl activating enzyme 12	acyl activating enzyme 12	protein-coding
1376	1	24634539	24634687	+	0	NA	3' UTR (AT1G66150.1, exon 2 of 2)	3' UTR (AT1G66150.1, exon 2 of 2)	-2583	AT1G66160.2	842931	At.23473	NM_105287		CMPG1	ATCMPG1|CYS|F15E12.6|F15E12_6|MET|PRO|and GLY protein 1	ubiquitin-protein ligase CMPG1	protein-coding
1510	1	26239715	26239784	+	0	NA	3' UTR (AT1G69760.1, exon 1 of 1)	3' UTR (AT1G69760.1, exon 1 of 1)	959	AT1G69760.1	843312	At.46680	NM_105644		AT1G69760	T6C23.4|T6C23_4	hypothetical protein	protein-coding
1741	1	28338153	28338342	+	0	NA	3' UTR (AT1G75500.2, exon 6 of 7)	3' UTR (AT1G75500.2, exon 6 of 7)	1994	AT1G75500.1	843886	At.21884	NM_106203		WAT1	F1B16.19|Walls Are Thin 1	protein walls are thin 1	protein-coding
2103	2	7898239	7898263	+	0	NA	3' UTR (AT2G18160.1, exon 1 of 1)	3' UTR (AT2G18160.1, exon 1 of 1)	991	AT2G18162.1	6240780	At.23493	NM_001124870		CPuORF1	conserved peptide upstream open reading frame 1	hypothetical protein	protein-coding
2201	2	9686359	9686559	+	0	NA	3' UTR (AT2G22770.1, exon 3 of 3)	3' UTR (AT2G22770.1, exon 3 of 3)	1734	AT2G22770.1	816807	At.43434	NM_179700		NAI1	T30L20.3|T30L20_3	transcription factor NAI1	protein-coding
2524	2	14393378	14393455	+	0	NA	3' UTR (AT2G34080.1, exon 2 of 2)	3' UTR (AT2G34080.1, exon 2 of 2)	865	AT2G34110.1	817972	At.68640	NM_128962		AT2G34110	T14G11.23|T14G11_23	hypothetical protein	protein-coding
2858	2	18278403	18278589	+	0	NA	3' UTR (AT2G44200.1, exon 3 of 3)	3' UTR (AT2G44200.1, exon 3 of 3)	-2127	AT2G44210.1	819029	At.25427	NM_129985		AT2G44210	F4I1.2	hypothetical protein	protein-coding
3024	3	165492	165683	+	0	NA	3' UTR (AT3G01430.1, exon 1 of 1)	3' UTR (AT3G01430.1, exon 1 of 1)	660	AT3G01430.1	821144	At.41278	NM_111009		AT3G01430	T13O15.7|T13O15_7	hypothetical protein	protein-coding
3452	3	5602768	5602965	+	0	NA	3' UTR (AT3G16480.1, exon 13 of 13)	3' UTR (AT3G16480.1, exon 13 of 13)	2831	AT3G16490.1	820897	At.38890	NM_112520		IQD26	IQ-domain 26	protein IQ-domain 26	protein-coding
3577	3	7585979	7586146	+	0	NA	3' UTR (AT3G21540.1, exon 12 of 12)	3' UTR (AT3G21540.1, exon 12 of 12)	-1479	AT3G21530.1	821707	At.50211	NM_113048		AT3G21530	-	DNAse I-like superfamily protein	protein-coding
3644	3	8496615	8496758	+	0	NA	3' UTR (AT3G23633.1, exon 1 of 1)	3' UTR (AT3G23633.1, exon 1 of 1)	595	AT3G23633.1	6240682	At.69228	NM_001125212		AT3G23633	-	F-box associated ubiquitination effector family protein	protein-coding
3667	3	8880149	8880324	+	0	NA	3' UTR (AT3G24450.1, exon 3 of 3)	3' UTR (AT3G24450.1, exon 3 of 3)	1486	AT3G24450.1	822035	At.6777	NM_113352		AT3G24450	-	heavy metal transport/detoxification domain-containing protein	protein-coding
3773	3	11011439	11011558	+	0	NA	3' UTR (AT3G29030.1, exon 3 of 3)	3' UTR (AT3G29030.1, exon 3 of 3)	1860	AT3G29030.1	822543	At.5970	NM_113824		EXPA5	ARABIDOPSIS THALIANA EXPANSIN 5|ARABIDOPSIS THALIANA EXPANSIN A5|ATEXP5|ATEXPA5|ATHEXP ALPHA 1.4|EXP5|EXPANSIN 5|expansin A5	expansin A5	protein-coding
3972	3	18999633	18999803	+	0	NA	3' UTR (AT3G51140.1, exon 5 of 5)	3' UTR (AT3G51140.1, exon 5 of 5)	-1138	AT3G51150.2	824279	At.35420	NM_114975		AT3G51150	-	ATP binding microtubule motor family protein	protein-coding
4458	4	2331942	2331959	+	0	NA	3' UTR (AT4G04630.1, exon 1 of 1)	3' UTR (AT4G04630.1, exon 1 of 1)	850	AT4G04630.1	825795	At.33987	NM_116701		AT4G04630	F4H6.15|F4H6_15	hypothetical protein	protein-coding
4491	4	5833437	5833577	+	0	NA	3' UTR (AT4G09150.1, exon 12 of 12)	3' UTR (AT4G09150.1, exon 12 of 12)	-1588	AT4G09153.1	3770109	At.63278	NM_001036527		LCR36	low-molecular-weight cysteine-rich 36	low-molecular-weight cysteine-rich 36	protein-coding
5234	4	17137485	17137630	+	0	NA	3' UTR (AT4G36220.1, exon 3 of 3)	3' UTR (AT4G36220.1, exon 3 of 3)	2078	AT4G36220.1	829779	At.20230	NM_119790		FAH1	CYP84A1|F23E13.110|F23E13_110|FERULATE-5-HYDROXYLASE|ferulic acid 5-hydroxylase 1	ferulic acid 5-hydroxylase 1	protein-coding
5418	5	26927	27053	+	0	NA	3' UTR (AT5G01075.1, exon 2 of 2)	3' UTR (AT5G01075.1, exon 2 of 2)	459	AT5G01075.1	831885	At.33971	NM_120185		AT5G01075	-	Glycosyl hydrolase family 35 protein	protein-coding
5635	5	2944674	2944775	+	0	NA	3' UTR (AT5G09462.1, exon 4 of 4)	3' UTR (AT5G09462.1, exon 4 of 4)	2115	AT5G09463.1	6240465		NM_001125726		CPuORF41	conserved peptide upstream open reading frame 41	conserved peptide upstream open reading frame 41	protein-coding
5742	5	4220520	4220612	+	0	NA	3' UTR (AT5G13220.3, exon 5 of 5)	3' UTR (AT5G13220.3, exon 5 of 5)	1519	AT5G13225.1	3770670				AT5G13225	67618.SNORNA00001	ncRNA	ncRNA
5794	5	4937780	4937911	+	0	NA	3' UTR (AT5G15210.1, exon 1 of 1)	3' UTR (AT5G15210.1, exon 1 of 1)	1162	AT5G15210.1	831373	At.27604	NM_121525		HB30	ATHB30|F8M21.100|F8M21_100|ZFHD3|ZINC FINGER HOMEODOMAIN 3|homeobox protein 30	zinc finger homeodomain transcriptional factor ZFHD3	protein-coding
5838	5	5764108	5764224	+	0	NA	3' UTR (AT5G17490.1, exon 1 of 1)	3' UTR (AT5G17490.1, exon 1 of 1)	1477	AT5G17480.1	831614	At.54884	NM_121754		PC1	APC1|K3M16.50|K3M16_50|pollen calcium-binding protein 1	pollen calcium-binding protein 1	protein-coding
5979	5	7678862	7679037	+	0	NA	3' UTR (AT5G22940.1, exon 4 of 4)	3' UTR (AT5G22940.1, exon 4 of 4)	2011	AT5G22940.1	832358	At.44147	NM_122200		F8H	FRA8 homolog|MRN17.17|MRN17_17	probable glucuronoxylan glucuronosyltransferase F8H	protein-coding
6259	5	18368909	18369094	+	0	NA	3' UTR (AT5G45340.2, exon 5 of 5)	3' UTR (AT5G45340.2, exon 5 of 5)	1990	AT5G45340.1	834570	At.9625	NM_123902		CYP707A3	K9E15.12|K9E15_12|cytochrome P450|family 707|polypeptide 3|subfamily A	abscisic acid 8'-hydroxylase 3	protein-coding
6366	5	20189733	20189925	+	0	NA	3' UTR (AT5G49690.1, exon 1 of 1)	3' UTR (AT5G49690.1, exon 1 of 1)	1561	AT5G49690.1	835032	At.29773	NM_124347		AT5G49690	K2I5.5|K2I5_5	UDP-glycosyltransferase 91C1	protein-coding
6434	5	21452625	21452823	+	0	NA	3' UTR (AT5G52900.1, exon 2 of 2)	3' UTR (AT5G52900.1, exon 2 of 2)	1084	AT5G52900.1	835367	At.29588	NM_124668		AT5G52900	MXC20.13|MXC20_13	membrane-associated kinase regulator family protein	protein-coding
6454	5	21725654	21725853	+	0	NA	3' UTR (AT5G53500.1, exon 6 of 6)	3' UTR (AT5G53500.1, exon 6 of 6)	-1111	AT5G53490.1	835431	At.20426	NM_124729		AT5G53490	MNC6.3|MNC6_3	thylakoid lumenal protein-17.4	protein-coding
6567	5	23153575	23153735	+	0	NA	3' UTR (AT5G57150.2, exon 4 of 4)	3' UTR (AT5G57150.2, exon 4 of 4)	1336	AT5G57150.1	835821	At.49181	NM_125097		AT5G57150	MUL3.10|MUL3_10	transcription factor bHLH35	protein-coding
6634	5	23840666	23840848	+	0	NA	3' UTR (AT5G59050.2, exon 2 of 3)	3' UTR (AT5G59050.2, exon 2 of 3)	1902	AT5G59050.1	836022	At.27245	NM_125295		AT5G59050	K18B18.4|K18B18_4	hypothetical protein	protein-coding
6697	5	24766496	24766688	+	0	NA	3' UTR (AT5G61600.1, exon 1 of 1)	3' UTR (AT5G61600.1, exon 1 of 1)	838	AT5G61600.1	836281	At.47568	NM_125553		ERF104	K11J9.13|K11J9_13|ethylene response factor 104	ethylene-responsive transcription factor ERF104	protein-coding
867	1	10690492	10690689	+	0	NA	5' UTR (AT1G30330.2, exon 1 of 15)	5' UTR (AT1G30330.2, exon 1 of 15)	248	AT1G30330.1	839913	At.21939	NM_102771		ARF6	T4K22.6|T4K22_6|auxin response factor 6	auxin response factor 6	protein-coding
971	1	12737906	12738042	+	0	NA	5' UTR (AT1G34750.1, exon 1 of 6)	5' UTR (AT1G34750.1, exon 1 of 6)	222	AT1G34750.1	840379	At.24391	NM_103195		AT1G34750	F11O6.14	putative protein phosphatase 2C 10	protein-coding
1028	1	17830192	17830389	+	0	NA	5' UTR (AT1G48270.1, exon 1 of 10)	5' UTR (AT1G48270.1, exon 1 of 10)	130	AT1G48270.1	841247	At.21469	NM_103724		GCR1	F11A17.17|F11A17_17|G-protein-coupled receptor 1	G-protein-coupled receptor 1	protein-coding
1117	1	19935727	19935877	+	0	NA	5' UTR (AT1G53430.2, exon 1 of 24)	5' UTR (AT1G53430.2, exon 1 of 24)	635	AT1G53430.1	841778	At.21553	NM_104221		AT1G53430	T3F20.25|T3F20_25	Leucine-rich repeat transmembrane protein kinase	protein-coding
1312	1	23769979	23770175	+	0	NA	5' UTR (AT1G64060.1, exon 1 of 14)	5' UTR (AT1G64060.1, exon 1 of 14)	303	AT1G64060.1	842710	At.235	NM_105079		RBOH F	ARABIDOPSIS THALIANA RESPIRATORY BURST OXIDASE HOMOLOG F|ATRBOH F|ATRBOHF|CYTOCHROME B245 BETA CHAIN HOMOLOG RBOHAP108|F22C12.18|F22C12_18|RBOHAP108|RBOHF|RESPIRATORY BURST OXIDASE PROTEIN F|respiratory burst oxidase protein F	respiratory burst oxidase	protein-coding
1605	1	26980835	26980999	+	0	NA	5' UTR (AT1G71710.2, exon 1 of 10)	5' UTR (AT1G71710.2, exon 1 of 10)	112	AT1G71710.2	843501	At.12019	NM_105829		AT1G71710	F14O23.9|F14O23_9	DNAse I-like superfamily protein	protein-coding
2091	2	7637587	7637734	+	0	NA	5' UTR (AT2G17550.2, exon 1 of 4)	5' UTR (AT2G17550.2, exon 1 of 4)	172	AT2G17550.1	816262	At.27964	NM_127309		AT2G17550	MJB20.11|MJB20_11	hypothetical protein	protein-coding
2393	2	12433432	12433557	+	0	NA	5' UTR (AT2G28950.1, exon 1 of 3)	5' UTR (AT2G28950.1, exon 1 of 3)	101	AT2G28950.1	817444	At.23765	NM_128454		EXPA6	ARABIDOPSIS THALIANA TEXPANSIN 6|ATEXP6|ATEXPA6|ATHEXP ALPHA 1.8|T9I4.3|T9I4_3|expansin A6	expansin A6	protein-coding
2578	2	15114619	15114779	+	0	NA	5' UTR (AT2G35990.3, exon 3 of 8)	5' UTR (AT2G35990.3, exon 3 of 8)	744	AT2G35990.1	818172	At.50820	NM_129158		AT2G35990	F11F19.10|F11F19_10	cytokinin riboside 5'-monophosphate phosphoribohydrolase LOG2	protein-coding
2698	2	16643445	16643554	+	0	NA	5' UTR (AT2G39870.1, exon 1 of 4)	5' UTR (AT2G39870.1, exon 1 of 4)	118	AT2G39870.1	818574	At.24826	NM_129545		AT2G39870	T28M21.3|T28M21_3	hypothetical protein	protein-coding
2971	2	19198114	19198195	+	0	NA	5' UTR (AT2G46720.1, exon 1 of 1)	5' UTR (AT2G46720.1, exon 1 of 1)	771	AT2G46720.1	819284	At.36468	NM_130237		KCS13	3-ketoacyl-CoA synthase 13|HIC|HIGH CARBON DIOXIDE|T3A4.10	3-ketoacyl-CoA synthase 13	protein-coding
3003	2	19558084	19558272	+	0	NA	5' UTR (AT2G47730.1, exon 4 of 6)	5' UTR (AT2G47730.1, exon 4 of 6)	1554	AT2G47720.1	819385	At.25017	NM_130340		AT2G47720	F17A22.11	hypothetical protein	protein-coding
3509	3	6465921	6466062	+	0	NA	5' UTR (AT3G18773.1, exon 1 of 1)	5' UTR (AT3G18773.1, exon 1 of 1)	166	AT3G18773.1	821409	At.47029	NM_180279		AT3G18773	MVE11.14	RING-H2 finger protein ATL77	protein-coding
3682	3	8960306	8960490	+	0	NA	5' UTR (AT3G24550.1, exon 1 of 8)	5' UTR (AT3G24550.1, exon 1 of 8)	140	AT3G24550.1	822051	At.21723	NM_113366		PERK1	ATPERK1|MOB24.11|proline extensin-like receptor kinase 1	proline-rich extensin-like receptor kinase 1	protein-coding
3791	3	11924307	11924484	+	0	NA	5' UTR (AT3G30300.1, exon 2 of 11)	5' UTR (AT3G30300.1, exon 2 of 11)	179	AT3G30300.1	822730	At.36806	NM_113929		AT3G30300	-	O-fucosyltransferase family protein	protein-coding
4678	4	9817761	9817912	+	0	NA	5' UTR (AT4G17615.2, exon 3 of 8)	5' UTR (AT4G17615.2, exon 3 of 8)	1270	AT4G17615.2	827481	At.11088	NM_117870		CBL1	ARABIDOPSIS THALIANA CALCINEURIN B-LIKE PROTEIN|ATCBL1|FCAALL.122|SCABP5|SOS3-LIKE CALCIUM BINDING PROTEIN 5|calcineurin B-like protein 1	calcineurin B-like protein 1	protein-coding
4899	4	12712534	12712713	+	0	NA	5' UTR (AT4G24620.1, exon 1 of 14)	5' UTR (AT4G24620.1, exon 1 of 14)	202	AT4G24620.2	828564	At.25158	NM_118595		PGI1	F22K18.180|F22K18_180|PGI|PHOSPHO-GLC ISOMERASE|PHOSPHOGLUCOSE ISOMERASE PRECURSOR|phosphoglucose isomerase 1	phosphoglucose isomerase 1	protein-coding
5017	4	14406357	14406537	+	0	NA	5' UTR (AT4G29220.1, exon 1 of 13)	5' UTR (AT4G29220.1, exon 1 of 13)	145	AT4G29220.1	829043	At.48917	NM_119066		PFK1	F17A13.40|F17A13_40|phosphofructokinase 1	6-phosphofructokinase 1	protein-coding
5138	4	16054004	16054169	+	0	NA	5' UTR (AT4G33300.1, exon 2 of 6)	5' UTR (AT4G33300.1, exon 2 of 6)	-2070	AT4G33310.1	829467	At.23642	NM_119485		AT4G33310	F17M5.70|F17M5_70	hypothetical protein	protein-coding
5273	4	17440246	17440359	+	0	NA	5' UTR (AT4G36990.1, exon 1 of 2)	5' UTR (AT4G36990.1, exon 1 of 2)	125	AT4G36990.1	829853	At.5365	NM_119862		HSF4	AP22.9|AP22_9|ARABIDOPSIS THALIANA CLASS B HEAT SHOCK FACTOR B1|ARABIDOPSIS THALIANA HEAT SHOCK FACTOR 4|AT-HSFB1|ATHSF4|CLASS B HEAT SHOCK FACTOR B1|HSFB1|heat shock factor 4	heat stress transcription factor B-1	protein-coding
5624	5	2758192	2758331	+	0	NA	5' UTR (AT5G08520.1, exon 1 of 2)	5' UTR (AT5G08520.1, exon 1 of 2)	101	AT5G08520.1	830751	At.8762	NM_120937		AT5G08520	F8L15.2	duplicated SANT DNA-binding domain-containing protein	protein-coding
5753	5	4315809	4315927	+	0	NA	5' UTR (AT5G13460.1, exon 1 of 6)	5' UTR (AT5G13460.1, exon 1 of 6)	109	AT5G13460.1	831188	At.26451	NM_121349		IQD11	IQ-domain 11|T22N19.110|T22N19_110	protein IQ-domain 11	protein-coding
6191	5	16866457	16866627	+	0	NA	5' UTR (AT5G42210.1, exon 2 of 14)	5' UTR (AT5G42210.1, exon 2 of 14)	502	AT5G42210.1	834226	At.48059	NM_123586		AT5G42210	K5J14.1|K5J14_1	major facilitator protein	protein-coding
6543	5	22865137	22865295	+	0	NA	5' UTR (AT5G56460.1, exon 1 of 6)	5' UTR (AT5G56460.1, exon 1 of 6)	106	AT5G56460.1	835747	At.29384	NM_125029		AT5G56460	MCD7.23|MCD7_23	probable receptor-like protein kinase	protein-coding
6923	5	26905781	26905980	+	0	NA	5' UTR (AT5G67420.1, exon 1 of 2)	5' UTR (AT5G67420.1, exon 1 of 2)	146	AT5G67420.1	836878	At.27456	NM_126142		LBD37	ASL39|ASYMMETRIC LEAVES2-LIKE 39|K8K14.16|K8K14_16|LOB domain-containing protein 37	LOB domain-containing protein 37	protein-coding
31	1	207006	207135	+	0	NA	exon (AT1G01570.1, exon 2 of 3)	exon (AT1G01570.1, exon 2 of 3)	1894	AT1G01570.1	837183	At.51447	NM_100039		AT1G01570	F22L4.11|F22L4_11	hypothetical protein	protein-coding
90	1	931562	931745	+	0	NA	exon (AT1G03730.1, exon 1 of 1)	exon (AT1G03730.1, exon 1 of 1)	242	AT1G03730.1	839106	At.42527	NM_100252		AT1G03730	F21B7.33	hypothetical protein	protein-coding
129	1	1569658	1569756	+	0	NA	exon (AT1G05370.1, exon 7 of 7)	exon (AT1G05370.1, exon 7 of 7)	2573	AT1G05370.1	837038	At.42403	NM_100416		AT1G05370	YUP8H12.1	Sec14p-like phosphatidylinositol transfer family protein	protein-coding
151	1	1859503	1859621	+	0	NA	exon (AT1G06130.2, exon 3 of 8)	exon (AT1G06130.2, exon 3 of 8)	1136	AT1G06130.2	837122	At.26891	NM_100494		GLX2-4	T21E18.18|T21E18_18|glyoxalase 2-4	glyoxalase 2-4	protein-coding
250	1	3264589	3264685	+	0	NA	exon (AT1G10000.1, exon 1 of 1)	exon (AT1G10000.1, exon 1 of 1)	151	AT1G10000.1	837535	At.42198	NM_100874		AT1G10000	T27I1.2|T27I1_2	ribonuclease H-like protein	protein-coding
255	1	3305862	3306046	+	0	NA	exon (AT1G10120.1, exon 1 of 8)	exon (AT1G10120.1, exon 1 of 8)	870	AT1G10120.1	837549	At.43391	NM_100886		AT1G10120	T27I1.15|T27I1_15	transcription factor bHLH74	protein-coding
292	1	3824639	3824809	+	0	NA	exon (AT1G11362.1, exon 1 of 1)	exon (AT1G11362.1, exon 1 of 1)	472	AT1G11362.1	6240451	At.69155	NM_001123797		AT1G11362	-	plant invertase/pectin methylesterase inhibitor superfamily protein	protein-coding
384	1	5060681	5060880	+	0	NA	exon (AT1G14700.2, exon 7 of 7)	exon (AT1G14700.2, exon 7 of 7)	2100	AT1G14700.1	838035	At.28419	NM_101339		PAP3	ATPAP3|F10B6.10|F10B6_10|purple acid phosphatase 3	purple acid phosphatase 3	protein-coding
396	1	5092058	5092248	+	0	NA	exon (AT1G14780.1, exon 3 of 7)	exon (AT1G14780.1, exon 3 of 7)	1163	AT1G14780.1	838043	At.70434	NM_101347		AT1G14780	F10B6.18|F10B6_18	MAC/Perforin domain-containing protein	protein-coding
468	1	5979571	5979584	+	0	NA	exon (AT1G17420.1, exon 5 of 8)	exon (AT1G17420.1, exon 5 of 8)	2166	AT1G17420.1	838314	At.20467	NM_101603		LOX3	F28G4.10|lipoxygenase 3	lipoxygenase 3	protein-coding
469	1	5981120	5981304	+	0	NA	exon (AT1G17420.1, exon 8 of 8)	exon (AT1G17420.1, exon 8 of 8)	-1055	AT1G17430.1	838315	At.22899	NM_101604		AT1G17430	F28G4.9	alpha/beta-hydrolase domain-containing protein	protein-coding
479	1	6193056	6193237	+	0	NA	exon (AT1G17990.2, exon 3 of 5)	exon (AT1G17990.2, exon 3 of 5)	846	AT1G17990.2	838379	At.18923	NM_101664		AT1G17990	T10F20.3	putative 12-oxophytodienoate reductase-like protein 2A	protein-coding
484	1	6202737	6202916	+	0	NA	exon (AT1G18020.1, exon 3 of 5)	exon (AT1G18020.1, exon 3 of 5)	577	AT1G18020.1	838382	At.18923	NM_179352		AT1G18020	-	putative 12-oxophytodienoate reductase-like protein 2B	protein-coding
492	1	6333417	6333601	+	0	NA	exon (AT1G18400.1, exon 6 of 6)	exon (AT1G18400.1, exon 6 of 6)	2111	AT1G18400.1	838421	At.46141	NM_101698		BEE1	BR enhanced expression 1|F15H18.11|F15H18_11	transcription factor BEE 1	protein-coding
496	1	6389786	6389974	+	0	NA	exon (AT1G18570.1, exon 1 of 3)	exon (AT1G18570.1, exon 1 of 3)	469	AT1G18570.1	838438	At.10908	NM_101715		MYB51	AtMYB51|BW51A|BW51B|F25I16.9|F25I16_9|HIG1|HIGH INDOLIC GLUCOSINOLATE 1|myb domain protein 51	myb domain protein 51	protein-coding
530	1	6686758	6686839	+	0	NA	exon (AT1G19340.1, exon 8 of 8)	exon (AT1G19340.1, exon 8 of 8)	-1724	AT1G19350.4	838518	At.24276	NM_101792		BES1	107 PROTEIN|BRASSINAZOLE-RESISTANT 2|BRI1-EMS-SUPPRESSOR 1|BZR2|F18O14.7|F18O14_7	protein brassinazole-resistant 2	protein-coding
553	1	6946385	6946529	+	0	NA	exon (AT1G20030.2, exon 2 of 3)	exon (AT1G20030.2, exon 2 of 3)	762	AT1G20030.1	838592	At.19670	NM_101858		AT1G20030	T20H2.19|T20H2_19	pathogenesis-related thaumatin-like protein	protein-coding
574	1	7239146	7239313	+	0	NA	exon (AT1G20823.1, exon 1 of 1)	exon (AT1G20823.1, exon 1 of 1)	429	AT1G20823.1	838674	At.15492	NM_101935		AT1G20823	F2D10.34|F2D10_34	RING-H2 finger protein ATL80	protein-coding
668	1	8152686	8152839	+	0	NA	exon (AT1G23020.1, exon 4 of 9)	exon (AT1G23020.1, exon 4 of 9)	768	AT1G23020.1	838910	At.41573	NM_102150		FRO3	ATFRO3|F19G10.4|F19G10_4|FERRIC REDUCTION OXIDASE 3|ferric reduction oxidase 3	ferric reduction oxidase 3	protein-coding
825	1	10072190	10072255	+	0	NA	exon (AT1G28660.1, exon 4 of 5)	exon (AT1G28660.1, exon 4 of 5)	-1140	AT1G28650.1	839765	At.51808	NM_102632		AT1G28650	F1K23.27|F1K23_27	GDSL esterase/lipase	protein-coding
853	1	10504096	10504270	+	0	NA	exon (AT1G29980.1, exon 2 of 3)	exon (AT1G29980.1, exon 2 of 3)	660	AT1G29980.2	839877	At.17979	NM_102738		AT1G29980	T1P2.9|T1P2_9	hypothetical protein	protein-coding
964	1	12420970	12421151	+	0	NA	exon (AT1G34110.1, exon 1 of 2)	exon (AT1G34110.1, exon 1 of 2)	463	AT1G34110.1	840310	At.16189	NM_103134		AT1G34110	F12G12.7|F12G12_7	leucine-rich receptor-like protein kinase	protein-coding
966	1	12472967	12473167	+	0	NA	exon (AT1G34245.1, exon 1 of 3)	exon (AT1G34245.1, exon 1 of 3)	199	AT1G34245.1	840324	At.39780	NM_103147		EPF2	EPIDERMAL PATTERNING FACTOR 2	protein EPIDERMAL PATTERNING FACTOR 2	protein-coding
999	1	16766556	16766730	+	0	NA	exon (AT1G44100.1, exon 2 of 5)	exon (AT1G44100.1, exon 2 of 5)	1042	AT1G44100.1	841013	At.25385	NM_103536		AAP5	T7O23.19|T7O23_19|amino acid permease 5	amino acid permease 5	protein-coding
1005	1	17013946	17014055	+	0	NA	exon (AT1G45010.1, exon 4 of 5)	exon (AT1G45010.1, exon 4 of 5)	1497	AT1G45010.1	841066	At.27146	NM_103581		AT1G45010	F27F5.9|F27F5_9	TRAM, LAG1 and CLN8 (TLC) lipid-sensing domain containing protein	protein-coding
1025	1	17644889	17644998	+	0	NA	exon (AT1G47890.1, exon 1 of 1)	exon (AT1G47890.1, exon 1 of 1)	967	AT1G47890.1	841206	At.52064	NM_103687		RLP7	AtRLP7|T6B12.2|T6B12_2|receptor like protein 7	receptor like protein 7	protein-coding
1035	1	18123589	18123750	+	0	NA	exon (AT1G49000.1, exon 1 of 1)	exon (AT1G49000.1, exon 1 of 1)	496	AT1G49000.1	841322	At.43849	NM_103793		AT1G49000	F27J15.21|F27J15_21	hypothetical protein	protein-coding
1046	1	18307133	18307254	+	0	NA	exon (AT1G49450.1, exon 1 of 1)	exon (AT1G49450.1, exon 1 of 1)	1652	AT1G49450.1	841369	At.28389	NM_103834		AT1G49450	F13F21.11|F13F21_11	WD40 domain-containing protein	protein-coding
1056	1	18411627	18411764	+	0	NA	exon (AT1G49750.1, exon 2 of 2)	exon (AT1G49750.1, exon 2 of 2)	1106	AT1G49750.1	841398	At.26947	NM_103862		AT1G49750	F14J22.4|F14J22_4	leucine-rich repeat (LRR) family protein	protein-coding
1062	1	18543699	18543868	+	0	NA	exon (AT1G50040.1, exon 2 of 2)	exon (AT1G50040.1, exon 2 of 2)	1653	AT1G50040.1	841428	At.43578	NM_103892		AT1G50040	F2J10.8|F2J10_8	hypothetical protein	protein-coding
1155	1	20431614	20431692	+	0	NA	exon (AT1G54740.1, exon 1 of 1)	exon (AT1G54740.1, exon 1 of 1)	884	AT1G54740.1	841915	At.37173	NM_104350		AT1G54740	T22H22.16|T22H22_16	hypothetical protein	protein-coding
1162	1	20566977	20567132	+	0	NA	exon (AT1G55120.2, exon 2 of 6)	exon (AT1G55120.2, exon 2 of 6)	456	AT1G55120.2	841955	At.458	NM_104385		FRUCT5	6-fructan exohydrolase|ATFRUCT5|AtcwINV3|BETA-FRUCTOFURANOSIDASE|T7N22.6|T7N22_6|beta-fructofuranosidase 5	beta-fructofuranosidase 5	protein-coding
1199	1	21233969	21234135	+	0	NA	exon (AT1G56650.1, exon 3 of 3)	exon (AT1G56650.1, exon 3 of 3)	1085	AT1G56650.1	842120	At.20447	NM_104541		PAP1	ATMYB75|F25P12.92|F25P12_92|MYB DOMAIN PROTEIN 75|MYB75|MYELOBLASTOSIS PROTEIN 75|SIAA1|SUC-INDUCED ANTHOCYANIN ACCUMULATION 1|phosphatidic acid phosphatase 1|production of anthocyanin pigment 1	transcription factor MYB75	protein-coding
1213	1	21541357	21541466	+	0	NA	exon (AT1G58190.1, exon 2 of 5)	exon (AT1G58190.1, exon 2 of 5)	779	AT1G58190.2	842186	At.43546	NM_104600		RLP9	AtRLP9|T18I24.10|T18I24_10|receptor like protein 9	receptor like protein 9	protein-coding
1216	1	21612465	21612638	+	0	NA	exon (AT1G58270.1, exon 5 of 5)	exon (AT1G58270.1, exon 5 of 5)	1566	AT1G58270.1	842196	At.445	NM_104607		ZW9	F19C14.11|F19C14_11	protein ZW9	protein-coding
1246	1	22272079	22272251	+	0	NA	exon (AT1G60450.1, exon 2 of 4)	exon (AT1G60450.1, exon 2 of 4)	1049	AT1G60450.1	842340	At.52288	NM_104732		GolS7	AtGolS7|T13D8.32|T13D8_32|galactinol synthase 7	galactinol synthase 7	protein-coding
1330	1	23941835	23941869	+	0	NA	exon (AT1G64450.1, exon 1 of 1)	exon (AT1G64450.1, exon 1 of 1)	994	AT1G64450.1	842753	At.36000	NM_105120		AT1G64450	F15H21.17	glycine-rich uncharacterized protein	protein-coding
1360	1	24440886	24441029	+	0	NA	exon (AT1G65720.1, exon 1 of 1)	exon (AT1G65720.1, exon 1 of 1)	116	AT1G65720.1	842883	At.22495	NM_105246		AT1G65720	F1E22.9|F1E22_9	hypothetical protein	protein-coding
1388	1	24749681	24749791	+	0	NA	exon (AT1G66350.1, exon 1 of 1)	exon (AT1G66350.1, exon 1 of 1)	1541	AT1G66350.1	842953	At.26400	NM_105306		RGL1	RGA-like 1|RGL|T27F4.10|T27F4_10	DELLA protein RGL1	protein-coding
1427	1	25298105	25298123	+	0	NA	exon (AT1G67510.1, exon 2 of 2)	exon (AT1G67510.1, exon 2 of 2)	-1177	AT1G67500.1	843071	At.35644	NM_105417		REV3	ATREV3|T1F15.3|T1F15_3|recovery protein 3	DNA polymerase zeta subunit	protein-coding
1449	1	25658944	25659126	+	0	NA	exon (AT1G68440.1, exon 1 of 1)	exon (AT1G68440.1, exon 1 of 1)	1002	AT1G68440.1	843173	At.20172	NM_105515		AT1G68440	T2E12.1|T2E12_1	hypothetical protein	protein-coding
1506	1	26230023	26230222	+	0	NA	exon (AT1G69730.1, exon 2 of 3)	exon (AT1G69730.1, exon 2 of 3)	1217	AT1G69730.1	843309	At.35382	NM_105641		AT1G69730	T6C23.7|T6C23_7	wall-associated receptor kinase-like 9	protein-coding
1543	1	26451060	26451217	+	0	NA	exon (AT1G70230.1, exon 2 of 2)	exon (AT1G70230.1, exon 2 of 2)	893	AT1G70230.1	843359	At.21753	NM_105691		TBL27	F20P5.5|F20P5_5|TRICHOME BIREFRINGENCE-LIKE 27	trichome birefringence-like 27 protein	protein-coding
1555	1	26513016	26513169	+	0	NA	exon (AT1G70370.2, exon 2 of 3)	exon (AT1G70370.2, exon 2 of 3)	2096	AT1G70370.1	843373	At.10202	NM_105705		PG2	polygalacturonase 2	polygalacturonase 2	protein-coding
1635	1	27259469	27259619	+	0	NA	exon (AT1G72416.2, exon 4 of 6)	exon (AT1G72416.2, exon 4 of 6)	747	AT1G72416.2	3767688	At.47738	NM_001036191		AT1G72416	-	chaperone DnaJ-domain containing protein	protein-coding
1679	1	27706104	27706275	+	0	NA	exon (AT1G73680.1, exon 3 of 9)	exon (AT1G73680.1, exon 3 of 9)	1325	AT1G73680.1	843703	At.19772	NM_106027		ALPHA DOX2	F25P22.10|F25P22_10|alpha dioxygenase	alpha dioxygenase	protein-coding
1684	1	27761182	27761365	+	0	NA	exon (AT1G73830.2, exon 6 of 6)	exon (AT1G73830.2, exon 6 of 6)	1298	AT1G73830.1	843719	At.34949	NM_106043		BEE3	BR enhanced expression 3|F25P22.25|F25P22_25	transcription factor BEE 3	protein-coding
1710	1	28053650	28053843	+	0	NA	exon (AT1G74670.1, exon 3 of 3)	exon (AT1G74670.1, exon 3 of 3)	460	AT1G74670.1	843806	At.24065	NM_106125		AT1G74670	F1M20.35|F1M20_35	gibberellin-regulated protein 6	protein-coding
1748	1	28367231	28367418	+	0	NA	exon (AT1G75540.1, exon 3 of 3)	exon (AT1G75540.1, exon 3 of 3)	1297	AT1G75540.1	843890	At.34761	NM_106207		STH2	F10A5.24|F10A5_24|salt tolerance homolog2	B-box zinc finger transcription factor BBX21	protein-coding
1763	1	28460299	28460480	+	0	NA	exon (AT1G75800.1, exon 3 of 3)	exon (AT1G75800.1, exon 3 of 3)	-1275	AT1G75810.1	843914	At.34728	NM_106231		AT1G75810	T4O12.4|T4O12_4	hypothetical protein	protein-coding
1797	1	28747176	28747371	+	0	NA	exon (AT1G76600.1, exon 1 of 1)	exon (AT1G76600.1, exon 1 of 1)	385	AT1G76600.1	843993	At.19394	NM_106310		AT1G76600	F14G6.20|F14G6_20	hypothetical protein	protein-coding
1823	1	29202392	29202583	+	0	NA	exon (AT1G77690.1, exon 4 of 7)	exon (AT1G77690.1, exon 4 of 7)	853	AT1G77690.1	844105	At.17772	NM_106418		LAX3	T32E8.2|T32E8_2|like AUX1 3	auxin influx carrier LAX3	protein-coding
1822	1	29201215	29201401	+	0	NA	exon (AT1G77690.1, exon 7 of 7)	exon (AT1G77690.1, exon 7 of 7)	2032	AT1G77690.1	844105	At.17772	NM_106418		LAX3	T32E8.2|T32E8_2|like AUX1 3	auxin influx carrier LAX3	protein-coding
1831	1	29315377	29315572	+	0	NA	exon (AT1G77980.1, exon 9 of 10)	exon (AT1G77980.1, exon 9 of 10)	1593	AT1G77980.1	844133	At.34354	NM_106447		AGL66	AGAMOUS-like 66|F28K19.20|F28K19_20	protein agamous-like 66	protein-coding
1866	1	29637309	29637461	+	0	NA	exon (AT1G78830.1, exon 1 of 1)	exon (AT1G78830.1, exon 1 of 1)	1167	AT1G78830.1	844220	At.23087	NM_106531		AT1G78830	F9K20.12|F9K20_12	curculin-like (mannose-binding) lectin-like protein	protein-coding
1874	1	29743411	29743565	+	0	NA	exon (AT1G79060.1, exon 1 of 1)	exon (AT1G79060.1, exon 1 of 1)	1740	AT1G79060.1	844247	At.34186	NM_106557		AT1G79060	YUP8H12R.32|YUP8H12R_32	hypothetical protein	protein-coding
1877	1	29760403	29760597	+	0	NA	exon (AT1G79110.1, exon 3 of 3)	exon (AT1G79110.1, exon 3 of 3)	1342	AT1G79110.1	844252	At.34179	NM_106562		AT1G79110	YUP8H12R.27|YUP8H12R_27	protein BRG2	protein-coding
1886	1	29817428	29817523	+	0	NA	exon (AT1G79270.1, exon 5 of 9)	exon (AT1G79270.1, exon 5 of 9)	1969	AT1G79270.1	844267	At.25521	NM_106577		ECT8	evolutionarily conserved C-terminal region 8	hypothetical protein	protein-coding
1894	1	29992709	29992726	+	0	NA	exon (AT1G79700.2, exon 4 of 8)	exon (AT1G79700.2, exon 4 of 8)	1007	AT1G79700.1	844309	At.21701	NM_106619		AT1G79700	F20B17.12|F20B17_12	AP2-like ethylene-responsive transcription factor WRI4	protein-coding
1936	2	181335	181508	+	0	NA	exon (AT2G01420.2, exon 3 of 6)	exon (AT2G01420.2, exon 3 of 6)	1907	AT2G01420.2	814670	At.24881	NM_126203		PIN4	ARABIDOPSIS PIN-FORMED 4|ATPIN4|AUXIN TRANSPORTER SPLICE VARIANT B|F10A8.27|PIN-FORMED 4	auxin efflux carrier component 4	protein-coding
1996	2	1025663	1025820	+	0	NA	exon (AT2G03370.1, exon 2 of 2)	exon (AT2G03370.1, exon 2 of 2)	1304	AT2G03370.1	814866	At.52620	NM_126388		AT2G03370	T4M8.20|T4M8_20	Glycosyltransferase family 61 protein	protein-coding
2012	2	1595894	1596090	+	0	NA	exon (AT2G04570.1, exon 3 of 3)	exon (AT2G04570.1, exon 3 of 3)	1319	AT2G04570.1	814999	At.27762	NM_126488		AT2G04570	T1O3.2|T1O3_2	GDSL esterase/lipase	protein-coding
2082	2	7320770	7320951	+	0	NA	exon (AT2G16895.1, exon 1 of 1)	exon (AT2G16895.1, exon 1 of 1)	1182	AT2G16895.1	3768441				AT2G16895	-	pseudo	pseudo
2083	2	7384121	7384258	+	0	NA	exon (AT2G16990.2, exon 2 of 14)	exon (AT2G16990.2, exon 2 of 14)	1110	AT2G16990.2	816202	At.40208	NM_127252		AT2G16990	F6P23.2|F6P23_2	major facilitator protein	protein-coding
2088	2	7593692	7593825	+	0	NA	exon (AT2G17480.1, exon 1 of 15)	exon (AT2G17480.1, exon 1 of 15)	332	AT2G17480.1	816254	At.14583	NM_127302		MLO8	ATMLO8|F5J6.21|MILDEW RESISTANCE LOCUS O 8	MLO-like protein 8	protein-coding
2110	2	7977245	7977378	+	0	NA	exon (AT2G18360.1, exon 3 of 5)	exon (AT2G18360.1, exon 3 of 5)	2066	AT2G18360.1	816351	At.28707	NM_127393		AT2G18360	T30D6.13|T30D6_13	esterase/lipase domain-containing protein	protein-coding
2114	2	8059699	8059878	+	0	NA	exon (AT2G18560.1, exon 1 of 1)	exon (AT2G18560.1, exon 1 of 1)	500	AT2G18560.1	816371	At.39977	NM_127412		AT2G18560	F24H14.9|F24H14_9	UDP-glycosyltransferase family protein	protein-coding
2135	2	8553600	8553762	+	0	NA	exon (AT2G19820.1, exon 2 of 2)	exon (AT2G19820.1, exon 2 of 2)	359	AT2G19820.1	816501	At.52834	NM_127540		LBD9	F6F22.15|F6F22_15|LOB domain-containing protein 9	LOB domain-containing protein 9	protein-coding
2183	2	9403498	9403651	+	0	NA	exon (AT2G22122.1, exon 1 of 1)	exon (AT2G22122.1, exon 1 of 1)	310	AT2G22122.1	2745552	At.47817	NM_201779		AT2G22122	-	hypothetical protein	protein-coding
2204	2	9712811	9712945	+	0	NA	exon (AT2G22805.1, exon 2 of 2)	exon (AT2G22805.1, exon 2 of 2)	587	AT2G22805.1	3768519	At.63226	NM_001036321		AT2G22805	-	putative defensin-like protein 189	protein-coding
2205	2	9715765	9715947	+	0	NA	exon (AT2G22807.1, exon 2 of 2)	exon (AT2G22807.1, exon 2 of 2)	771	AT2G22807.1	3767872	At.63196	NM_001036322		AT2G22807	-	putative defensin-like protein 190	protein-coding
2212	2	9744775	9744970	+	0	NA	exon (AT2G22900.1, exon 2 of 2)	exon (AT2G22900.1, exon 2 of 2)	1420	AT2G22900.1	816821	At.48507	NM_127855		AT2G22900	T20K9.11	putative glycosyltransferase 7	protein-coding
2249	2	10108072	10108230	+	0	NA	exon (AT2G23760.3, exon 5 of 5)	exon (AT2G23760.3, exon 5 of 5)	-4122	AT2G23755.1	816907	At.45723	NM_179712		AT2G23755	-	hypothetical protein	protein-coding
2315	2	11382592	11382711	+	0	NA	exon (AT2G26710.1, exon 3 of 4)	exon (AT2G26710.1, exon 3 of 4)	-2131	AT2G26720.1	817213	At.66248	NM_128229		AT2G26720	F18A8.9|F18A8_9	plastocyanin-like domain-containing protein	protein-coding
2323	2	11669707	11669863	+	0	NA	exon (AT2G27260.1, exon 1 of 1)	exon (AT2G27260.1, exon 1 of 1)	130	AT2G27260.1	817268	At.13628	NM_128284		AT2G27260	F12K2.16|F12K2_16	late embryogenesis abundant hydroxyproline-rich glycoprotein	protein-coding
2325	2	11684168	11684252	+	0	NA	exon (AT2G27310.1, exon 1 of 1)	exon (AT2G27310.1, exon 1 of 1)	757	AT2G27310.1	817274	At.13633	NM_128290		AT2G27310	F12K2.11|F12K2_11	F-box protein	protein-coding
2324	2	11684052	11684091	+	0	NA	exon (AT2G27310.1, exon 1 of 1)	exon (AT2G27310.1, exon 1 of 1)	896	AT2G27310.1	817274	At.13633	NM_128290		AT2G27310	F12K2.11|F12K2_11	F-box protein	protein-coding
2337	2	11799365	11799512	+	0	NA	exon (AT2G27660.1, exon 1 of 1)	exon (AT2G27660.1, exon 1 of 1)	1412	AT2G27660.1	817312	At.38732	NM_128325		AT2G27660	F15K20.24|F15K20_24	cysteine/histidine-rich C1 domain-containing protein	protein-coding
2341	2	11810433	11810605	+	0	NA	exon (AT2G27690.1, exon 1 of 1)	exon (AT2G27690.1, exon 1 of 1)	1213	AT2G27690.1	817315	At.13273	NM_128328		CYP94C1	F15K20.21|F15K20_21|cytochrome P450|family 94|polypeptide 1|subfamily C	cytochrome P450, family 94, subfamily C, polypeptide 1	protein-coding
2396	2	12497581	12497712	+	0	NA	exon (AT2G29090.1, exon 4 of 9)	exon (AT2G29090.1, exon 4 of 9)	2077	AT2G29090.2	817457	At.50108	NM_128466		CYP707A2	T9I4.17|T9I4_17|cytochrome P450|family 707|polypeptide 2|subfamily A	abscisic acid 8'-hydroxylase 2	protein-coding
2395	2	12495851	12495970	+	0	NA	exon (AT2G29090.1, exon 8 of 9)	exon (AT2G29090.1, exon 8 of 9)	-2625	AT2G29080.1	817456	At.24335	NM_179798		ftsh3	FTSH protease 3|T9I4.16|T9I4_16	FTSH protease 3	protein-coding
2400	2	12525581	12525662	+	0	NA	exon (AT2G29130.1, exon 5 of 6)	exon (AT2G29130.1, exon 5 of 6)	2126	AT2G29130.1	817462	At.13041	NM_128470		LAC2	ATLAC2|T9I4.21|T9I4_21|laccase 2	laccase 2	protein-coding
2409	2	12680207	12680356	+	0	NA	exon (AT2G29660.1, exon 1 of 1)	exon (AT2G29660.1, exon 1 of 1)	1391	AT2G29660.1	817516	At.43819	NM_128520		AT2G29660	T27A16.24|T27A16_24	hypothetical protein	protein-coding
2419	2	12807789	12807972	+	0	NA	exon (AT2G30010.1, exon 4 of 5)	exon (AT2G30010.1, exon 4 of 5)	2156	AT2G30010.1	817552	At.12754	NM_128556		TBL45	F23F1.7|F23F1_7|TRICHOME BIREFRINGENCE-LIKE 45	protein trichome birefringence-like 45	protein-coding
2423	2	12822787	12822933	+	0	NA	exon (AT2G30040.1, exon 1 of 1)	exon (AT2G30040.1, exon 1 of 1)	1150	AT2G30040.1	817555	At.28381	NM_128559		MAPKKK14	F23F1.4|F23F1_4|mitogen-activated protein kinase kinase kinase 14	mitogen-activated protein kinase kinase kinase 14	protein-coding
2477	2	13660420	13660577	+	0	NA	exon (AT2G32150.1, exon 8 of 8)	exon (AT2G32150.1, exon 8 of 8)	1492	AT2G32150.1	817774	At.21600	NM_128774		AT2G32150	F22D22.10|F22D22_10	haloacid dehalogenase-like hydrolase domain-containing protein	protein-coding
2486	2	13798844	13799001	+	0	NA	exon (AT2G32510.1, exon 1 of 1)	exon (AT2G32510.1, exon 1 of 1)	1017	AT2G32510.1	817812	At.66291	NM_128810		MAPKKK17	T26B15.7|T26B15_7|mitogen-activated protein kinase kinase kinase 17	mitogen-activated protein kinase kinase kinase 17	protein-coding
2502	2	14075016	14075203	+	0	NA	exon (AT2G33210.1, exon 17 of 17)	exon (AT2G33210.1, exon 17 of 17)	-1898	AT2G33205.1	817882	At.53015	NM_179871		AT2G33205	-	Serinc-domain containing serine and sphingolipid biosynthesis protein	protein-coding
2508	2	14181913	14182110	+	0	NA	exon (AT2G33480.1, exon 3 of 3)	exon (AT2G33480.1, exon 3 of 3)	825	AT2G33480.2	817913	At.47520	NM_128908		NAC041	ANAC041|F4P9.25|F4P9_25|NAC domain containing protein 41	NAC domain containing protein 41	protein-coding
2526	2	14406510	14406710	+	0	NA	exon (AT2G34123.1, exon 2 of 2)	exon (AT2G34123.1, exon 2 of 2)	370	AT2G34123.1	3768647	At.64424	NM_001036396		AT2G34123	-	putative defensin-like protein 52	protein-coding
2572	2	15083226	15083347	+	0	NA	exon (AT2G35930.1, exon 1 of 1)	exon (AT2G35930.1, exon 1 of 1)	1187	AT2G35930.1	818166	At.43241	NM_129152		PUB23	F11F19.16|F11F19_16|plant U-box 23	E3 ubiquitin-protein ligase PUB23	protein-coding
2582	2	15151358	15151530	+	0	NA	exon (AT2G36080.2, exon 1 of 1)	exon (AT2G36080.2, exon 1 of 1)	131	AT2G36080.1	818181	At.23308	NM_129167		AT2G36080	F9C22.1	protein ABNORMAL SHOOT 2	protein-coding
2610	2	15516526	15516573	+	0	NA	exon (AT2G36950.1, exon 3 of 3)	exon (AT2G36950.1, exon 3 of 3)	1416	AT2G36950.1	818269	At.24096	NM_129251		AT2G36950	T1J8.13|T1J8_13	heavy-metal-associated domain-containing protein	protein-coding
2621	2	15588163	15588332	+	0	NA	exon (AT2G37090.1, exon 2 of 3)	exon (AT2G37090.1, exon 2 of 3)	1010	AT2G37090.1	818285	At.26964	NM_129265		IRX9	IRREGULAR XYLEM 9|T2N18.15|T2N18_15	probable beta-1,4-xylosyltransferase IRX9	protein-coding
2622	2	15611421	15611590	+	0	NA	exon (AT2G37160.2, exon 9 of 11)	exon (AT2G37160.2, exon 9 of 11)	2677	AT2G37160.2	818292	At.37461	NM_129272		AT2G37160	T2N18.8|T2N18_8	transducin/WD-40 repeat-containing protein	protein-coding
2639	2	15937262	15937381	+	0	NA	exon (AT2G38080.1, exon 6 of 6)	exon (AT2G38080.1, exon 6 of 6)	2861	AT2G38080.1	818386	At.12454	NM_129364		IRX12	ARABIDOPSIS LACCASE-LIKE MULTICOPPER OXIDASE 4|ATLMCO4|F16M14.1|F16M14_1|IRREGULAR XYLEM 12|LAC4|LACCASE 4|LACCASE-LIKE MULTICOPPER OXIDASE 4|LMCO4	laccase-4	protein-coding
2644	2	15974326	15974363	+	0	NA	exon (AT2G38120.1, exon 5 of 9)	exon (AT2G38120.1, exon 5 of 9)	1351	AT2G38120.1	818390	At.24295	NM_129368		AUX1	AUXIN RESISTANT 1|F16M14.5|F16M14_5|MAP1|MODIFIER OF ARF7/NPH4 PHENOTYPES 1|PIR1|WAV5|WAVY ROOTS 5	auxin transporter protein 1	protein-coding
2691	2	16562887	16562986	+	0	NA	exon (AT2G39710.1, exon 1 of 1)	exon (AT2G39710.1, exon 1 of 1)	444	AT2G39710.1	818555	At.20674	NM_129528		AT2G39710	F17A14.9	cysteine-rich peptide family protein	protein-coding
2707	2	16704729	16704928	+	0	NA	exon (AT2G40004.1, exon 2 of 2)	exon (AT2G40004.1, exon 2 of 2)	765	AT2G40004.1	6240350	At.73721	NM_001125010		AT2G40004	-	hypothetical protein	protein-coding
2719	2	16900325	16900456	+	0	NA	exon (AT2G40460.1, exon 4 of 4)	exon (AT2G40460.1, exon 4 of 4)	3262	AT2G40470.1	818641	At.27426	NM_129608		LBD15	ASL11|ASYMMETRIC LEAVES2-LIKE 11|LOB domain-containing protein 15|T2P4.18|T2P4_18	LOB domain-containing protein 15	protein-coding
2763	2	17262053	17262185	+	0	NA	exon (AT2G41410.1, exon 1 of 1)	exon (AT2G41410.1, exon 1 of 1)	765	AT2G41410.1	818739	At.24025	NM_129704		AT2G41410	F13H10.4|F13H10_4	putative calcium-binding protein CML35	protein-coding
2797	2	17639448	17639621	+	0	NA	exon (AT2G42350.1, exon 1 of 1)	exon (AT2G42350.1, exon 1 of 1)	382	AT2G42350.1	818836	At.42716	NM_129797		AT2G42350	MHK10.7|MHK10_7	RING-H2 finger protein ATL40	protein-coding
2830	2	17903924	17904115	+	0	NA	exon (AT2G43050.1, exon 2 of 2)	exon (AT2G43050.1, exon 2 of 2)	1535	AT2G43050.1	818907	At.43649	NM_129866		ATPMEPCRD	MFL8.9	putative pectinesterase/ pectinerase inhibitor 16	protein-coding
2895	2	18628619	18628794	+	0	NA	exon (AT2G45190.1, exon 6 of 7)	exon (AT2G45190.1, exon 6 of 7)	2006	AT2G45190.1	819127	At.10852	NM_130082		AFO	ABNORMAL FLORAL ORGANS|ABNORMAL FLORAL ORGANS PROTEIN|F4L23.30|FIL|FILAMENTOUS FLOWER|YAB1|YABBY1	axial regulator YABBY 1	protein-coding
2902	2	18642137	18642323	+	0	NA	exon (AT2G45210.1, exon 1 of 1)	exon (AT2G45210.1, exon 1 of 1)	664	AT2G45210.1	819129	At.43531	NM_130084		AT2G45210	F4L23.28	SAUR-like auxin-responsive protein	protein-coding
2928	2	18866992	18867189	+	0	NA	exon (AT2G45830.1, exon 2 of 6)	exon (AT2G45830.1, exon 2 of 6)	1029	AT2G45830.2	819191	At.36585	NM_130146		DTA2	F4I18.19|downstream target of AGL15 2	downstream target of AGL15 2	protein-coding
2939	2	18961884	18962072	+	0	NA	exon (AT2G46150.1, exon 1 of 1)	exon (AT2G46150.1, exon 1 of 1)	575	AT2G46150.1	819222	At.36547	NM_130177		AT2G46150	T3F17.20	late embryogenesis abundant hydroxyproline-rich glycoprotein	protein-coding
2964	2	19153840	19154016	+	0	NA	exon (AT2G46660.1, exon 2 of 2)	exon (AT2G46660.1, exon 2 of 2)	1561	AT2G46660.1	819278	At.36480	NM_130231		CYP78A6	T3A4.4|T3A4_4|cytochrome P450|family 78|polypeptide 6|subfamily A	cytochrome P450, family 78, subfamily A, polypeptide 6	protein-coding
3055	3	556664	556847	+	0	NA	exon (AT3G02610.1, exon 2 of 4)	exon (AT3G02610.1, exon 2 of 4)	1129	AT3G02610.1	820709	At.41109	NM_111129		AT3G02610	F16B3.24|F16B3_24	acyl-[acyl-carrier-protein] desaturase	protein-coding
3091	3	1106372	1106570	+	0	NA	exon (AT3G04210.1, exon 2 of 2)	exon (AT3G04210.1, exon 2 of 2)	1598	AT3G04210.1	819576	At.18791	NM_111292		AT3G04210	T6K12.17|T6K12_17	TIR-NBS class disease resistance protein	protein-coding
3117	3	1490452	1490614	+	0	NA	exon (AT3G05220.2, exon 1 of 1)	exon (AT3G05220.2, exon 1 of 1)	1114	AT3G05220.2	819686	At.40712	NM_111395		AT3G05220	T12H1.19|T12H1_19	heavy-metal-associated domain-containing protein	protein-coding
3130	3	1650849	1651014	+	0	NA	exon (AT3G05660.1, exon 1 of 2)	exon (AT3G05660.1, exon 1 of 2)	1070	AT3G05660.1	819733	At.49590	NM_111439		RLP33	AtRLP33|F18C1.7|F18C1_7|receptor like protein 33	receptor like protein 33	protein-coding
3168	3	1960104	1960187	+	0	NA	exon (AT3G06433.1, exon 1 of 1)	exon (AT3G06433.1, exon 1 of 1)	1244	AT3G06433.1	3768778				AT3G06433	F24P17.9	pseudo	pseudo
3258	3	3589332	3589517	+	0	NA	exon (AT3G11415.1, exon 1 of 1)	exon (AT3G11415.1, exon 1 of 1)	740	AT3G11415.1	10723045				AT3G11415	-	ncRNA	ncRNA
3271	3	3679621	3679802	+	0	NA	exon (AT3G11660.1, exon 1 of 1)	exon (AT3G11660.1, exon 1 of 1)	232	AT3G11660.1	820338	At.15768	NM_111998		NHL1	NDR1/HIN1-like 1	NDR1/HIN1-Like protein 1	protein-coding
3275	3	3696311	3696442	+	0	NA	exon (AT3G11690.1, exon 1 of 1)	exon (AT3G11690.1, exon 1 of 1)	1388	AT3G11690.1	820341	At.24161	NM_112001		AT3G11690	-	hypothetical protein	protein-coding
3346	3	4483859	4484058	+	0	NA	exon (AT3G13686.1, exon 1 of 1)	exon (AT3G13686.1, exon 1 of 1)	110	AT3G13686.1	6240972	At.73676	NM_001125149		AT3G13686	-	hypothetical protein	protein-coding
3355	3	4535077	4535202	+	0	NA	exon (AT3G13790.1, exon 3 of 7)	exon (AT3G13790.1, exon 3 of 7)	728	AT3G13790.2	820591	At.24308	NM_112232		ATBFRUCT1	ARABIDOPSIS THALIANA CELL WALL INVERTASE 1|ATCWINV1	beta-fructofuranosidase, insoluble isoenzyme CWINV1	protein-coding
3354	3	4533083	4533166	+	0	NA	exon (AT3G13790.1, exon 7 of 7)	exon (AT3G13790.1, exon 7 of 7)	-2455	AT3G13784.1	820590	At.53300	NM_112231		CWINV5	AtcwINV5|cell wall invertase 5	beta-fructofuranosidase, insoluble isoenzyme CWINV5	protein-coding
3375	3	4773953	4774137	+	0	NA	exon (AT3G14310.1, exon 2 of 3)	exon (AT3G14310.1, exon 2 of 3)	1074	AT3G14310.1	820651	At.6066	NM_112289		PME3	ATPME3|pectin methylesterase 3	pectin methylesterase 3	protein-coding
3377	3	4798170	4798366	+	0	NA	exon (AT3G14370.1, exon 1 of 1)	exon (AT3G14370.1, exon 1 of 1)	1236	AT3G14370.1	820658	At.39249	NM_112295		WAG2	-	protein kinase WAG2	protein-coding
3406	3	5122107	5122123	+	0	NA	exon (AT3G15210.1, exon 1 of 1)	exon (AT3G15210.1, exon 1 of 1)	693	AT3G15210.1	820752	At.47551	NM_112384		ERF4	ATERF-4|ATERF4|ETHYLENE RESPONSIVE ELEMENT BINDING FACTOR 4|RAP2.5|RELATED TO AP2 5|ethylene responsive element binding factor 4	ethylene-responsive transcription factor 4	protein-coding
3437	3	5352165	5352320	+	0	NA	exon (AT3G15820.1, exon 2 of 3)	exon (AT3G15820.1, exon 2 of 3)	1171	AT3G15820.1	820825	At.5629	NM_112452		ROD1	REDUCED OLEATE DESATURATION 1	phosphatidylcholine:diacylglycerol cholinephosphotransferase	protein-coding
3470	3	5822530	5822639	+	0	NA	exon (AT3G17070.1, exon 2 of 3)	exon (AT3G17070.1, exon 2 of 3)	1623	AT3G17070.1	820964	At.38797	NM_112583		AT3G17070	-	peroxidase 29	protein-coding
3493	3	6228581	6228692	+	0	NA	exon (AT3G18170.1, exon 1 of 1)	exon (AT3G18170.1, exon 1 of 1)	294	AT3G18170.1	821344	At.38597	NM_112700		AT3G18170	-	glycosyltransferase family 61 protein	protein-coding
3570	3	7475485	7475637	+	0	NA	exon (AT3G21270.1, exon 1 of 1)	exon (AT3G21270.1, exon 1 of 1)	882	AT3G21270.1	821681	At.257	NM_113022		DOF2	ADOF2|DOF zinc finger protein 2	Dof zinc finger protein DOF2	protein-coding
3640	3	8404499	8404663	+	0	NA	exon (AT3G23440.1, exon 1 of 1)	exon (AT3G23440.1, exon 1 of 1)	103	AT3G23440.1	821925	At.65136	NM_113247		EDA6	EMBRYO SAC DEVELOPMENT ARREST 6|MATERNAL EFFECT EMBRYO ARREST 37|MEE37	protein EMBRYO SAC DEVELOPMENT ARREST 6	protein-coding
3710	3	9578828	9579027	+	0	NA	exon (AT3G26180.1, exon 2 of 2)	exon (AT3G26180.1, exon 2 of 2)	1159	AT3G26180.2	822219	At.25393	NM_113525		CYP71B20	cytochrome P450|family 71|polypeptide 20|subfamily B	cytochrome P450 71B20	protein-coding
3757	3	10458690	10458878	+	0	NA	exon (AT3G28100.1, exon 4 of 7)	exon (AT3G28100.1, exon 4 of 7)	2685	AT3G28100.1	822434	At.43041	NM_113728		AT3G28100	-	nodulin MtN21-like transporter family protein UMAMIT45	protein-coding
3803	3	15952228	15952384	+	0	NA	exon (AT3G44260.1, exon 1 of 1)	exon (AT3G44260.1, exon 1 of 1)	778	AT3G44260.1	823551	At.1713	NM_114294		AT3G44260	-	putative CCR4-associated factor 1	protein-coding
3833	3	16819871	16820028	+	0	NA	exon (AT3G45780.2, exon 2 of 20)	exon (AT3G45780.2, exon 2 of 20)	1506	AT3G45780.2	823721	At.3720	NM_114447		PHOT1	F16L2.3|JK224|NONPHOTOTROPIC HYPOCOTYL 1|NPH1|PHOTOTROPIN|ROOT PHOTOTROPISM 1|RPT1|phototropin 1	phototropin 1	protein-coding
3889	3	18152546	18152706	+	0	NA	exon (AT3G48970.1, exon 3 of 3)	exon (AT3G48970.1, exon 3 of 3)	749	AT3G48970.1	824058	At.35663	NM_114756		AT3G48970	-	Heavy metal transport/detoxification superfamily protein	protein-coding
3925	3	18648695	18648835	+	0	NA	exon (AT3G50310.1, exon 1 of 1)	exon (AT3G50310.1, exon 1 of 1)	756	AT3G50310.1	824193	At.35507	NM_114891		MAPKKK20	mitogen-activated protein kinase kinase kinase 20	mitogen-activated protein kinase kinase kinase 20	protein-coding
3939	3	18795717	18795862	+	0	NA	exon (AT3G50625.1, exon 1 of 1)	exon (AT3G50625.1, exon 1 of 1)	4246	AT3G50625.1	3769696				AT3G50625	-	pseudo	pseudo
3970	3	18974353	18974511	+	0	NA	exon (AT3G51080.1, exon 3 of 3)	exon (AT3G51080.1, exon 3 of 3)	1219	AT3G51080.1	824272	At.27088	NM_114968		GATA6	GATA transcription factor 6	GATA transcription factor 6	protein-coding
4009	3	19535583	19535704	+	0	NA	exon (AT3G52710.1, exon 1 of 1)	exon (AT3G52710.1, exon 1 of 1)	1058	AT3G52710.1	824437	At.35266	NM_115131		AT3G52710	-	hypothetical protein	protein-coding
4015	3	19582277	19582471	+	0	NA	exon (AT3G52840.1, exon 6 of 18)	exon (AT3G52840.1, exon 6 of 18)	1261	AT3G52840.1	824450	At.702	NM_115144		BGAL2	beta-galactosidase 2	beta-galactosidase 2	protein-coding
4031	3	19909878	19909935	+	0	NA	exon (AT3G53720.1, exon 1 of 5)	exon (AT3G53720.1, exon 1 of 5)	206	AT3G53720.1	824539	At.35166	NM_115232		CHX20	ATCHX20|cation/H+ exchanger 20	cation/H(+) antiporter 20	protein-coding
4077	3	20551844	20551938	+	0	NA	exon (AT3G55430.1, exon 1 of 2)	exon (AT3G55430.1, exon 1 of 2)	324	AT3G55430.1	824709	At.1190	NM_115401		AT3G55430	-	O-Glycosyl hydrolases family 17 protein	protein-coding
4080	3	20605907	20606090	+	0	NA	exon (AT3G55560.1, exon 2 of 2)	exon (AT3G55560.1, exon 2 of 2)	382	AT3G55560.1	824721	At.35015	NM_115413		AGF2	AHL15|AT-hook motif nuclear-localized protein 15|AT-hook protein of GA feedback 2	AT-hook protein of GA feedback 2	protein-coding
4090	3	20737356	20737480	+	0	NA	exon (AT3G55880.1, exon 2 of 2)	exon (AT3G55880.1, exon 2 of 2)	827	AT3G55880.1	824754	At.45920	NM_115446		AT3G55880	SUE4|sulphate utilization efficiency 4	protein SULPHATE UTILIZATION EFFICIENCY 4	protein-coding
4092	3	20753877	20754068	+	0	NA	exon (AT3G55950.1, exon 1 of 1)	exon (AT3G55950.1, exon 1 of 1)	2423	AT3G55950.1	824761	At.34973	NM_115453		CCR3	ATCRR3|CRINKLY4 related 3	CRINKLY4 related 3	protein-coding
4100	3	20804461	20804576	+	0	NA	exon (AT3G56060.1, exon 3 of 5)	exon (AT3G56060.1, exon 3 of 5)	1495	AT3G56060.1	824772	At.26322	NM_115464		AT3G56060	-	Glucose-methanol-choline (GMC) oxidoreductase family protein	protein-coding
4104	3	20878755	20878955	+	0	NA	exon (AT3G56290.1, exon 3 of 3)	exon (AT3G56290.1, exon 3 of 3)	713	AT3G56290.1	824796	At.27406	NM_115487		AT3G56290	-	hypothetical protein	protein-coding
4196	3	22220324	22220426	+	0	NA	exon (AT3G60140.1, exon 12 of 12)	exon (AT3G60140.1, exon 12 of 12)	-1730	AT3G60150.1	825185	At.34488	NM_115878		AT3G60150	-	hypothetical protein	protein-coding
4274	3	22906400	22906599	+	0	NA	exon (AT3G61880.2, exon 2 of 3)	exon (AT3G61880.2, exon 2 of 3)	1459	AT3G61880.2	825361	At.23925	NM_116053		CYP78A9	cytochrome p450 78a9	cytochrome p450 78a9	protein-coding
4281	3	22929369	22929550	+	0	NA	exon (AT3G61910.1, exon 2 of 2)	exon (AT3G61910.1, exon 2 of 2)	983	AT3G61910.1	825364	At.34210	NM_116056		NAC066	ANAC066|NAC SECONDARY WALL THICKENING PROMOTING FACTOR2|NAC domain protein 66|NST2	NAC transcription factor NST2	protein-coding
4354	4	315011	315107	+	0	NA	exon (AT4G00750.1, exon 1 of 5)	exon (AT4G00750.1, exon 1 of 5)	706	AT4G00750.1	825923	At.45840	NM_116300		AT4G00750	F15P23.1|F15P23_1	putative methyltransferase PMT15	protein-coding
4372	4	580235	580412	+	0	NA	exon (AT4G01420.1, exon 7 of 8)	exon (AT4G01420.1, exon 7 of 8)	1195	AT4G01420.1	826671	At.3815	NM_116372		CBL5	F3D13.2|F3D13_2|calcineurin B-like protein 5	calcineurin B-like protein 5	protein-coding
4395	4	793330	793493	+	0	NA	exon (AT4G01840.1, exon 1 of 2)	exon (AT4G01840.1, exon 1 of 2)	150	AT4G01840.1	828091	At.585	NM_116414		KCO5	ATKCO5|ATTPK5|Ca2+ activated outward rectifying K+ channel 5|T7B11.10|T7B11_10|TPK5	Ca2+ activated outward rectifying K+ channel 5	protein-coding
4425	4	1176221	1176405	+	0	NA	exon (AT4G02670.1, exon 3 of 3)	exon (AT4G02670.1, exon 3 of 3)	-1992	AT4G02660.1	828210	At.75279	NM_116500		AT4G02660	T10P11.5|T10P11_5	Beige/BEACH and WD40 domain-containing protein	protein-coding
4427	4	1237931	1238089	+	0	NA	exon (AT4G02780.1, exon 15 of 15)	exon (AT4G02780.1, exon 15 of 15)	6803	AT4G02780.1	828182	At.355	NM_116512		GA1	ABC33|ARABIDOPSIS THALIANA ENT-COPALYL DIPHOSPHATE SYNTHETASE 1|ATCPS1|CPP synthase|CPS|CPS1|ENT-COPALYL DIPHOSPHATE SYNTHETASE|ENT-COPALYL DIPHOSPHATE SYNTHETASE 1|GA REQUIRING 1|T5J8.9|T5J8_9	Ent-copalyl diphosphate synthase	protein-coding
4472	4	2988634	2988746	+	0	NA	exon (AT4G05630.1, exon 1 of 1)	exon (AT4G05630.1, exon 1 of 1)	132	AT4G05630.1	825935	At.33838	NM_116801		AT4G05630	F21I2.20|F21I2_20	hypothetical protein	protein-coding
4473	4	3357889	3358075	+	0	NA	exon (AT4G06534.1, exon 1 of 1)	exon (AT4G06534.1, exon 1 of 1)	1112	AT4G06534.1	826005	At.54181	NM_178980		AT4G06534	-	hypothetical protein	protein-coding
4478	4	5246261	5246448	+	0	NA	exon (AT4G08300.1, exon 3 of 7)	exon (AT4G08300.1, exon 3 of 7)	1463	AT4G08300.1	826384	At.33762	NM_116899		AT4G08300	T12G13.140|T12G13_140	nodulin MtN21 /EamA-like transporter family protein	protein-coding
4557	4	7760734	7760915	+	0	NA	exon (AT4G13340.1, exon 1 of 1)	exon (AT4G13340.1, exon 1 of 1)	2214	AT4G13340.1	826964	At.48854	NM_117407		AT4G13340	T9E8.80|T9E8_80	leucine-rich repeat extensin-like protein 3	protein-coding
4601	4	8852850	8852965	+	0	NA	exon (AT4G15490.1, exon 1 of 1)	exon (AT4G15490.1, exon 1 of 1)	1638	AT4G15490.1	827221	At.21544	NM_117639		UGT84A3	DL3785C|FCAALL.17	UDP-glycosyltransferase 84A3	protein-coding
4625	4	9255738	9255919	+	0	NA	exon (AT4G16380.1, exon 3 of 3)	exon (AT4G16380.1, exon 3 of 3)	1273	AT4G16380.2	2745712	At.24999	NM_202830		AT4G16380	-	metal ion binding protein	protein-coding
4649	4	9450344	9450535	+	0	NA	exon (AT4G16780.1, exon 4 of 4)	exon (AT4G16780.1, exon 4 of 4)	1325	AT4G16780.1	827384	At.24419	NM_117780		HB-2	ARABIDOPSIS THALIANA HOMEOBOX PROTEIN 2|ATHB-2|ATHB2|DL4415W|FCAALL.101|HAT4|homeobox protein 2	homeobox protein 2	protein-coding
4664	4	9669655	9669681	+	0	NA	exon (AT4G17245.1, exon 1 of 1)	exon (AT4G17245.1, exon 1 of 1)	303	AT4G17245.1	827437	At.26389	NM_117830		AT4G17245	-	RING/U-box domain-containing protein	protein-coding
4670	4	9753028	9753054	+	0	NA	exon (AT4G17490.1, exon 1 of 1)	exon (AT4G17490.1, exon 1 of 1)	826	AT4G17490.1	827463	At.24407	NM_117854		ERF6	ATERF6|DL4780C|ERF-6-6|FCAALL.120|ethylene responsive element binding factor 6	ethylene responsive element binding factor 6	protein-coding
4682	4	9850108	9850284	+	0	NA	exon (AT4G17695.1, exon 1 of 6)	exon (AT4G17695.1, exon 1 of 6)	508	AT4G17695.1	827490	At.26411	NM_117878		KAN3	KANADI 3	probable transcription factor KAN3	protein-coding
4715	4	10224974	10225148	+	0	NA	exon (AT4G18550.1, exon 4 of 4)	exon (AT4G18550.1, exon 4 of 4)	1801	AT4G18550.1	827587	At.32892	NM_117969		AT4G18550	F28J12.210|F28J12_210	phospholipase A1-IIgamma	protein-coding
4737	4	10523342	10523522	+	0	NA	exon (AT4G19230.2, exon 7 of 7)	exon (AT4G19230.2, exon 7 of 7)	2053	AT4G19230.1	827663	At.1930	NM_118043		CYP707A1	T18B16.200|T18B16_200|cytochrome P450|family 707|polypeptide 1|subfamily A	abscisic acid 8'-hydroxylase 1	protein-coding
4754	4	10850052	10850236	+	0	NA	exon (AT4G20050.1, exon 4 of 4)	exon (AT4G20050.1, exon 4 of 4)	-1029	AT4G20040.1	827749	At.26265	NM_118123		AT4G20040	F18F4.140|F18F4_140	pectin lyase-like protein	protein-coding
4761	4	10942000	10942111	+	0	NA	exon (AT4G20260.6, exon 3 of 6)	exon (AT4G20260.6, exon 3 of 6)	1309	AT4G20260.5	827773	At.21638	NM_118145		PCAP1	ARABIDOPSIS THALIANA PLASMA-MEMBRANE ASSOCIATED CATION-BINDING PROTEIN 1|ATPCAP1|F1C12.180|F1C12_180|plasma-membrane associated cation-binding protein 1	plasma-membrane associated cation-binding protein 1	protein-coding
4796	4	11622721	11622889	+	0	NA	exon (AT4G21903.2, exon 2 of 7)	exon (AT4G21903.2, exon 2 of 7)	933	AT4G21903.1	6241480	At.74352	NM_001125553		AT4G21903	-	mate efflux domain-containing protein	protein-coding
4798	4	11627404	11627579	+	0	NA	exon (AT4G21910.2, exon 2 of 8)	exon (AT4G21910.2, exon 2 of 8)	1846	AT4G21910.2	828280	At.22674	NM_118312		AT4G21910	T8O5.120|T8O5_120	MATE efflux family protein	protein-coding
4797	4	11627065	11627264	+	0	NA	exon (AT4G21910.2, exon 2 of 8)	exon (AT4G21910.2, exon 2 of 8)	2173	AT4G21910.2	828280	At.22674	NM_118312		AT4G21910	T8O5.120|T8O5_120	MATE efflux family protein	protein-coding
4805	4	11646903	11647033	+	0	NA	exon (AT4G21960.1, exon 4 of 4)	exon (AT4G21960.1, exon 4 of 4)	1494	AT4G21960.1	828285	At.21298	NM_118317		PRXR1	F1N20.3|PEROXIDASE PRXR1	peroxidase 42	protein-coding
4829	4	12060947	12061143	+	0	NA	exon (AT4G23010.3, exon 6 of 8)	exon (AT4G23010.3, exon 6 of 8)	1712	AT4G23010.2	828400	At.23149	NM_118430		UTR2	ATUTR2|F7H19.200|F7H19_200|UDP-galactose transporter 2	UDP-galactose transporter 2	protein-coding
4864	4	12345467	12345641	+	0	NA	exon (AT4G23700.1, exon 2 of 4)	exon (AT4G23700.1, exon 2 of 4)	489	AT4G23700.1	828470	At.2564	NM_118501		CHX17	ATCHX17|F9D16.170|F9D16_170|cation/H+ exchanger 17	cation/H(+) antiporter 17	protein-coding
4893	4	12573363	12573499	+	0	NA	exon (AT4G24240.1, exon 3 of 3)	exon (AT4G24240.1, exon 3 of 3)	1665	AT4G24240.1	828525	At.20946	NM_118557		WRKY7	ATWRKY7|T22A6.70|T22A6_70|WRKY DNA-binding protein 7	WRKY transcription factor-like calmodulin binding protein	protein-coding
4935	4	13147955	13148084	+	0	NA	exon (AT4G25860.1, exon 3 of 6)	exon (AT4G25860.1, exon 3 of 6)	693	AT4G25860.1	828692	At.32225	NM_118719		ORP4A	F14M19.140|F14M19_140|OSBP(oxysterol binding protein)-related protein 4A	OSBP(oxysterol binding protein)-related protein 4A	protein-coding
4942	4	13246434	13246600	+	0	NA	exon (AT4G26140.1, exon 6 of 18)	exon (AT4G26140.1, exon 6 of 18)	1409	AT4G26140.2	828720	At.2962	NM_118747		BGAL12	F20B18.250|F20B18_250|beta-galactosidase 12	beta-galactosidase 12	protein-coding
5038	4	14694438	14694638	+	0	NA	exon (AT4G30064.1, exon 2 of 2)	exon (AT4G30064.1, exon 2 of 2)	236	AT4G30064.1	3770558	At.63311	NM_001036676		LCR61	low-molecular-weight cysteine-rich 61	low-molecular-weight cysteine-rich 61	protein-coding
5039	4	14696261	14696430	+	0	NA	exon (AT4G30067.1, exon 2 of 2)	exon (AT4G30067.1, exon 2 of 2)	271	AT4G30067.1	3770559	At.63312	NM_001036677		LCR63	low-molecular-weight cysteine-rich 63	low-molecular-weight cysteine-rich 63	protein-coding
5064	4	14881989	14882153	+	0	NA	exon (AT4G30440.1, exon 1 of 1)	exon (AT4G30440.1, exon 1 of 1)	1409	AT4G30440.1	829167	At.20969	NM_119190		GAE1	F17I23.220|F17I23_220|UDP-D-glucuronate 4-epimerase 1	UDP-D-glucuronate 4-epimerase 1	protein-coding
5113	4	15590040	15590210	+	0	NA	exon (AT4G32290.1, exon 1 of 1)	exon (AT4G32290.1, exon 1 of 1)	1039	AT4G32290.1	829363	At.4595	NM_119382		AT4G32290	F10M6.70|F10M6_70	core-2/I-branching beta-1,6-N-acetylglucosaminyltransferase family protein	protein-coding
5117	4	15613291	15613487	+	0	NA	exon (AT4G32340.1, exon 2 of 3)	exon (AT4G32340.1, exon 2 of 3)	916	AT4G32340.1	829368	At.2033	NM_119386		AT4G32340	F8B4.40	tetratricopeptide repeat domain-containing protein-like protein	protein-coding
5123	4	15754181	15754285	+	0	NA	exon (AT4G32650.1, exon 2 of 13)	exon (AT4G32650.1, exon 2 of 13)	612	AT4G32650.3	829400	At.100	NM_119417		KAT3	A. thaliana low-K+-tolerant 1|ARABIDOPSIS THALIANA K+ RECTIFYING CHANNEL 1|ATKC1|AtLKT1|F4D11.150|F4D11_150|K+ INWARD RECTIFYING CHANNEL PROTEIN|KC1|potassium channel in Arabidopsis thaliana 3	potassium channel KAT3	protein-coding
5125	4	15829866	15830042	+	0	NA	exon (AT4G32810.1, exon 2 of 6)	exon (AT4G32810.1, exon 2 of 6)	1726	AT4G32810.1	829417	At.31633	NM_119434		CCD8	ATCCD8|MAX4|MORE AXILLARY BRANCHING 4|T16I18.20|T16I18_20|carotenoid cleavage dioxygenase 8	carotenoid cleavage dioxygenase 8	protein-coding
5126	4	15895118	15895293	+	0	NA	exon (AT4G32920.1, exon 1 of 22)	exon (AT4G32920.1, exon 1 of 22)	801	AT4G32920.2	829429	At.26242	NM_119446		AT4G32920	F26P21.40|F26P21_40	glycine-rich protein	protein-coding
5129	4	15921908	15922074	+	0	NA	exon (AT4G32990.1, exon 8 of 10)	exon (AT4G32990.1, exon 8 of 10)	1761	AT4G32990.1	829436	At.54584	NM_119453		AT4G32990	F26P21.110|F26P21_110	WD40 domain-containing protein	protein-coding
5235	4	17147455	17147627	+	0	NA	exon (AT4G36240.1, exon 2 of 2)	exon (AT4G36240.1, exon 2 of 2)	680	AT4G36240.1	829781	At.31340	NM_119792		GATA7	F23E13.130|F23E13_130|GATA transcription factor 7	GATA transcription factor 7	protein-coding
5332	4	17775892	17776087	+	0	NA	exon (AT4G37800.1, exon 4 of 4)	exon (AT4G37800.1, exon 4 of 4)	1408	AT4G37800.1	829936	At.42942	NM_119942		XTH7	T28I19.80|T28I19_80|xyloglucan endotransglucosylase/hydrolase 7	xyloglucan endotransglucosylase/hydrolase protein 7	protein-coding
5345	4	17995795	17995967	+	0	NA	exon (AT4G38460.1, exon 2 of 2)	exon (AT4G38460.1, exon 2 of 2)	1100	AT4G38460.1	830002	At.20379	NM_120007		GGR	geranylgeranyl reductase	geranylgeranyl reductase	protein-coding
5357	4	18072840	18073040	+	0	NA	exon (AT4G38680.1, exon 1 of 1)	exon (AT4G38680.1, exon 1 of 1)	242	AT4G38680.1	830024	At.24348	NM_120029		GRP2	ARABIDOPSIS THALIANA COLD SHOCK PROTEIN 2|ATCSP2|COLD SHOCK DOMAIN PROTEIN 2|COLD SHOCK PROTEIN 2|CSDP2|CSP2|GRP-2|T9A14.9|glycine rich protein 2	glycine rich protein 2	protein-coding
5366	4	18182606	18182796	+	0	NA	exon (AT4G39020.1, exon 2 of 5)	exon (AT4G39020.1, exon 2 of 5)	386	AT4G39020.1	830057	At.54652	NM_120062		AT4G39020	F19H22.120|F19H22_120	SH3 domain-containing protein	protein-coding
5427	5	98855	99045	+	0	NA	exon (AT5G01240.1, exon 4 of 9)	exon (AT5G01240.1, exon 4 of 9)	417	AT5G01240.2	831866	At.9820	NM_120202		LAX1	F7J8.220|F7J8_220|like AUXIN RESISTANT 1	auxin transporter-like protein 1	protein-coding
5439	5	289983	290147	+	0	NA	exon (AT5G01750.1, exon 1 of 2)	exon (AT5G01750.1, exon 1 of 2)	300	AT5G01750.2	831684	At.21392	NM_120253		AT5G01750	T20L15.20|T20L15_20	hypothetical protein	protein-coding
5464	5	436076	436245	+	0	NA	exon (AT5G02190.1, exon 1 of 1)	exon (AT5G02190.1, exon 1 of 1)	949	AT5G02190.1	831845	At.4814	NM_120297		PCS1	ARABIDOPSIS THALIANA ASPARTIC PROTEASE 38|ATASP38|EMB24|EMBRYO DEFECTIVE 24|PHYTOCHELATIN SYNTHASE 1|PROMOTION OF CELL SURVIVAL 1|T7H20.240|T7H20_240	aspartic proteinase PCS1	protein-coding
5559	5	1673222	1673314	+	0	NA	exon (AT5G05600.1, exon 2 of 3)	exon (AT5G05600.1, exon 2 of 3)	1148	AT5G05600.1	830443	At.8725	NM_120642		AT5G05600	MOP10.14|MOP10_14	oxidoreductase, 2OG-Fe(II) oxygenase family protein	protein-coding
5565	5	1747829	1748011	+	0	NA	exon (AT5G05810.1, exon 1 of 1)	exon (AT5G05810.1, exon 1 of 1)	1090	AT5G05810.1	830466	At.50435	NM_120663		ATL43	MJJ3.23|MJJ3_23	RING-H2 finger protein ATL43	protein-coding
5617	5	2651435	2651560	+	0	NA	exon (AT5G08240.1, exon 2 of 2)	exon (AT5G08240.1, exon 2 of 2)	901	AT5G08240.1	830720	At.32606	NM_120907		AT5G08240	F8L15.11	hypothetical protein	protein-coding
5640	5	3032918	3033106	+	0	NA	exon (AT5G09760.1, exon 1 of 2)	exon (AT5G09760.1, exon 1 of 2)	637	AT5G09760.1	830836	At.28396	NM_121013		AT5G09760	F17I14.50|F17I14_50	putative pectinesterase/pectinesterase inhibitor 51	protein-coding
5690	5	3645834	3645948	+	0	NA	exon (AT5G11420.1, exon 2 of 3)	exon (AT5G11420.1, exon 2 of 3)	1344	AT5G11420.1	831013	At.21285	NM_121180		AT5G11420	F15N18.10|F15N18_10	hypothetical protein	protein-coding
5700	5	3749083	3749279	+	0	NA	exon (AT5G11660.1, exon 2 of 5)	exon (AT5G11660.1, exon 2 of 5)	301	AT5G11660.1	831038	At.54822	NM_121204		AT5G11660	T22P22.50|T22P22_50	hypothetical protein	protein-coding
5729	5	4182190	4182344	+	0	NA	exon (AT5G13170.1, exon 3 of 6)	exon (AT5G13170.1, exon 3 of 6)	1039	AT5G13170.1	831156	At.46857	NM_121320		SAG29	T19L5.130|T19L5_130|senescence-associated gene 29	senescence-associated protein 29	protein-coding
5782	5	4695694	4695855	+	0	NA	exon (AT5G14565.1, exon 2 of 2)	exon (AT5G14565.1, exon 2 of 2)	1148	AT5G14565.1	5008211				MIR398C	microRNA398C	miscRNA	miscRNA
5791	5	4827530	4827702	+	0	NA	exon (AT5G14920.1, exon 4 of 4)	exon (AT5G14920.1, exon 4 of 4)	-1024	AT5G14930.3	831345	At.23431	NM_121497		SAG101	F2G14.50|F2G14_50|senescence-associated gene 101	acyl hydrolase	protein-coding
5848	5	5902690	5902868	+	0	NA	exon (AT5G17860.1, exon 1 of 1)	exon (AT5G17860.1, exon 1 of 1)	1601	AT5G17860.1	831654	At.9244	NM_121792		CAX7	MPI7.2|calcium exchanger 7	calcium exchanger 7	protein-coding
5854	5	5996672	5996825	+	0	NA	exon (AT5G18130.2, exon 1 of 1)	exon (AT5G18130.2, exon 1 of 1)	1268	AT5G18130.1	831931	At.7548	NM_121818		AT5G18130	MRG7.9|MRG7_9	hypothetical protein	protein-coding
5860	5	6062444	6062631	+	0	NA	exon (AT5G18310.1, exon 4 of 5)	exon (AT5G18310.1, exon 4 of 5)	831	AT5G18310.2	831949	At.31446	NM_121836		AT5G18310	F20L16.30|F20L16_30	hypothetical protein	protein-coding
5887	5	6389283	6389437	+	0	NA	exon (AT5G19090.1, exon 4 of 4)	exon (AT5G19090.1, exon 4 of 4)	1871	AT5G19090.3	832028	At.31334	NM_121914		AT5G19090	T16G12.130|T16G12_130	heavy metal transport/detoxification domain-containing protein	protein-coding
5921	5	6827135	6827136	+	0	NA	exon (AT5G20230.1, exon 2 of 2)	exon (AT5G20230.1, exon 2 of 2)	629	AT5G20230.1	832145	At.20630	NM_122030		BCB	ATBCB|BLUE COPPER BINDING PROTEIN|F5O24.120|F5O24_120|SAG14|SENESCENCE ASSOCIATED GENE 14|blue-copper-binding protein	blue-copper-binding protein	protein-coding
5924	5	6834369	6834529	+	0	NA	exon (AT5G20250.3, exon 2 of 4)	exon (AT5G20250.3, exon 2 of 4)	790	AT5G20250.4	832147	At.25459	NM_122032		DIN10	DARK INDUCIBLE 10|F5O24.140|F5O24_140	putative galactinol--sucrose galactosyltransferase 6	protein-coding
5926	5	6868925	6868987	+	0	NA	exon (AT5G20320.1, exon 1 of 25)	exon (AT5G20320.1, exon 1 of 25)	310	AT5G20320.1	832154	At.31201	NM_122039		DCL4	ATDCL4|DICER-LIKE 4|F5O24.210|F5O24_210|dicer-like 4	dicer-like protein 4	protein-coding
5943	5	7202520	7202678	+	0	NA	exon (AT5G21160.3, exon 3 of 16)	exon (AT5G21160.3, exon 3 of 16)	1491	AT5G21160.1	832242	At.21994	NM_122123		AT5G21160	T10F18.190|T10F18_190	LA RNA-binding protein	protein-coding
5947	5	7226825	7226982	+	0	NA	exon (AT5G21482.1, exon 1 of 4)	exon (AT5G21482.1, exon 1 of 4)	176	AT5G21482.1	832248	At.16886	NM_180532		CKX7	ARABIDOPSIS THALIANA CYTOKININ OXIDASE 5|ATCKX5|cytokinin oxidase 7	cytokinin dehydrogenase 7	protein-coding
5990	5	7986392	7986571	+	0	NA	exon (AT5G23680.1, exon 1 of 1)	exon (AT5G23680.1, exon 1 of 1)	370	AT5G23680.1	832433	At.23395	NM_122273		AT5G23680	MQM1.5|MQM1_5	Sterile alpha motif (SAM) domain-containing protein	protein-coding
5996	5	8100735	8100860	+	0	NA	exon (AT5G23980.1, exon 3 of 8)	exon (AT5G23980.1, exon 3 of 8)	526	AT5G23980.1	832463	At.28267	NM_122303		FRO4	ATFRO4|MZF18.14|MZF18_14|ferric reduction oxidase 4	ferric reduction oxidase 4	protein-coding
5995	5	8100060	8100200	+	0	NA	exon (AT5G23980.1, exon 4 of 8)	exon (AT5G23980.1, exon 4 of 8)	1193	AT5G23980.1	832463	At.28267	NM_122303		FRO4	ATFRO4|MZF18.14|MZF18_14|ferric reduction oxidase 4	ferric reduction oxidase 4	protein-coding
5997	5	8120751	8120902	+	0	NA	exon (AT5G24030.1, exon 2 of 6)	exon (AT5G24030.1, exon 2 of 6)	1958	AT5G24030.1	832468	At.6575	NM_122308		SLAH3	MZF18.9|MZF18_9|SLAC1 homologue 3	SLAC1 homologue 3	protein-coding
6023	5	8589299	8589424	+	0	NA	exon (AT5G24930.1, exon 1 of 2)	exon (AT5G24930.1, exon 1 of 2)	127	AT5G24930.1	832563	At.3220	NM_122402		COL4	ATCOL4|CONSTANS-like 4|F6A4.140|F6A4_140	zinc finger protein CONSTANS-LIKE 4	protein-coding
6053	5	8936143	8936340	+	0	NA	exon (AT5G25620.1, exon 2 of 4)	exon (AT5G25620.1, exon 2 of 4)	2425	AT5G25620.1	832638	At.28557	NM_122473		YUC6	T14C9.160|T14C9_160|YUCCA6	flavin-containing monooxygenase YUCCA6	protein-coding
6071	5	9658777	9658944	+	0	NA	exon (AT5G27360.1, exon 4 of 18)	exon (AT5G27360.1, exon 4 of 18)	1834	AT5G27360.1	832795	At.26154	NM_122618		SFP2	F21A20.70|F21A20_70	sugar transporter ERD6-like 18	protein-coding
6086	5	10292844	10293028	+	0	NA	exon (AT5G28300.1, exon 2 of 2)	exon (AT5G28300.1, exon 2 of 2)	2347	AT5G28300.1	832914	At.19292	NM_122713		AT5G28300	T8M17.70|T8M17_70	trihelix transcription factor GTL2	protein-coding
6115	5	14888267	14888335	+	0	NA	exon (AT5G37490.1, exon 1 of 1)	exon (AT5G37490.1, exon 1 of 1)	823	AT5G37490.1	833727	At.30484	NM_123108		AT5G37490	MPA22.3|MPA22_3	U-box domain-containing protein 21	protein-coding
6116	5	14913256	14913339	+	0	NA	exon (AT5G37540.1, exon 1 of 1)	exon (AT5G37540.1, exon 1 of 1)	462	AT5G37540.1	833732	At.9003	NM_123113		AT5G37540	MPA22.8|MPA22_8	aspartyl protease family protein	protein-coding
6143	5	16163347	16163507	+	0	NA	exon (AT5G40390.1, exon 3 of 5)	exon (AT5G40390.1, exon 3 of 5)	1912	AT5G40390.1	834037	At.8441	NM_123403		SIP1	MPO12.100|MPO12_100|seed imbibition 1-like	putative galactinol--sucrose galactosyltransferase 5	protein-coding
6152	5	16330198	16330251	+	0	NA	exon (AT5G40790.1, exon 1 of 1)	exon (AT5G40790.1, exon 1 of 1)	802	AT5G40790.1	834079	At.65610	NM_123444		AT5G40790	MHK7.2|MHK7_2	hypothetical protein	protein-coding
6179	5	16738374	16738568	+	0	NA	exon (AT5G41810.2, exon 1 of 2)	exon (AT5G41810.2, exon 1 of 2)	404	AT5G41810.1	834186	At.26146	NM_123546		AT5G41810	K16L22.9|K16L22_9	hypothetical protein	protein-coding
6227	5	17731517	17731678	+	0	NA	exon (AT5G44060.1, exon 1 of 1)	exon (AT5G44060.1, exon 1 of 1)	592	AT5G44060.1	834429	At.27507	NM_123773		AT5G44060	MRH10.17|MRH10_17	hypothetical protein	protein-coding
6232	5	17800237	17800412	+	0	NA	exon (AT5G44190.1, exon 4 of 5)	exon (AT5G44190.1, exon 4 of 5)	1955	AT5G44190.1	834442	At.19638	NM_123786		GLK2	ATGLK2|GBF'S PRO-RICH REGION-INTERACTING FACTOR 2|GOLDEN2-like 2|GPRI2|MLN1.11|MLN1_11	transcription activator GLK2	protein-coding
6247	5	17977948	17978126	+	0	NA	exon (AT5G44578.1, exon 2 of 3)	exon (AT5G44578.1, exon 2 of 3)	860	AT5G44578.1	5008300	At.64778	NM_001085244		AT5G44578	-	hypothetical protein	protein-coding
6255	5	18219530	18219671	+	0	NA	exon (AT5G45100.2, exon 1 of 1)	exon (AT5G45100.2, exon 1 of 1)	901	AT5G45100.1	834543	At.26652	NM_123878		AT5G45100	K17O22.9|K17O22_9	BOI-related protein 1	protein-coding
6270	5	18589608	18589796	+	0	NA	exon (AT5G45830.1, exon 3 of 3)	exon (AT5G45830.1, exon 3 of 3)	-1159	AT5G45820.1	834622	At.7703	NM_123950		CIPK20	CBL-interacting protein kinase 20|K15I22.2|K15I22_2|PKS18|PROTEIN KINASE 18|SNF1-RELATED PROTEIN KINASE 3.6|SnRK3.6	CBL-interacting serine/threonine-protein kinase 20	protein-coding
6271	5	18638832	18639031	+	0	NA	exon (AT5G45960.1, exon 3 of 5)	exon (AT5G45960.1, exon 3 of 5)	1430	AT5G45960.1	834636	At.29984	NM_123964		AT5G45960	K15I22.16|K15I22_16	GDSL esterase/lipase	protein-coding
6310	5	19180839	19181004	+	0	NA	exon (AT5G47230.1, exon 1 of 1)	exon (AT5G47230.1, exon 1 of 1)	982	AT5G47230.1	834770	At.9512	NM_124094		ERF5	ATERF-5|ATERF5|ETHYLENE RESPONSIVE ELEMENT BINDING FACTOR 5|ETHYLENE RESPONSIVE ELEMENT BINDING FACTOR- 5|MQL5.9|MQL5_9|ethylene responsive element binding factor 5	ethylene-responsive transcription factor 5	protein-coding
6332	5	19401305	19401463	+	0	NA	exon (AT5G47910.1, exon 7 of 8)	exon (AT5G47910.1, exon 7 of 8)	2704	AT5G47920.1	834843	At.29873	NM_124166		AT5G47920	MCA23.26|MCA23_26	hypothetical protein	protein-coding
6360	5	20092371	20092545	+	0	NA	exon (AT5G49520.1, exon 3 of 3)	exon (AT5G49520.1, exon 3 of 3)	1682	AT5G49520.1	835012	At.27170	NM_124329		WRKY48	ARABIDOPSIS THALIANA WRKY DNA-BINDING PROTEIN 48|ATWRKY48|K6M13.6|K6M13_6|WRKY DNA-binding protein 48	putative WRKY transcription factor 48	protein-coding
6363	5	20145779	20145955	+	0	NA	exon (AT5G49630.1, exon 2 of 6)	exon (AT5G49630.1, exon 2 of 6)	631	AT5G49630.1	835025	At.163	NM_124341		AAP6	MNI5.1|MNI5_1|amino acid permease 6	amino acid permease 6	protein-coding
6520	5	22545470	22545573	+	0	NA	exon (AT5G55670.1, exon 1 of 2)	exon (AT5G55670.1, exon 1 of 2)	1280	AT5G55670.1	835661	At.6556	NM_124949		AT5G55670	MDF20.11|MDF20_11	RNA recognition motif-containing protein	protein-coding
6558	5	23040809	23040966	+	0	NA	exon (AT5G56960.1, exon 2 of 5)	exon (AT5G56960.1, exon 2 of 5)	287	AT5G56960.1	835798	At.55597	NM_125078		AT5G56960	MHM17.7|MHM17_7	putative transcription factor bHLH041	protein-coding
6559	5	23057204	23057363	+	0	NA	exon (AT5G56980.1, exon 1 of 1)	exon (AT5G56980.1, exon 1 of 1)	459	AT5G56980.1	835800	At.7095	NM_125080		AT5G56980	MHM17.10|MHM17_10	hypothetical protein	protein-coding
6596	5	23376738	23376935	+	0	NA	exon (AT5G57700.3, exon 8 of 8)	exon (AT5G57700.3, exon 8 of 8)	1594	AT5G57700.3	835877	At.42974	NM_125153		AT5G57700	MRI1.6|MRI1_6	BNR/Asp-box repeat family protein	protein-coding
6772	5	25704865	25704982	+	0	NA	exon (AT5G64260.1, exon 1 of 1)	exon (AT5G64260.1, exon 1 of 1)	994	AT5G64260.1	836547	At.23633	NM_125822		EXL2	EXORDIUM like 2|MSJ1_10	protein EXORDIUM like 2	protein-coding
6818	5	26124758	26124869	+	0	NA	exon (AT5G65380.1, exon 5 of 9)	exon (AT5G65380.1, exon 5 of 9)	1626	AT5G65380.1	836663	At.28742	NM_125936		AT5G65380	MNA5.11|MNA5_11	MATE efflux family protein	protein-coding
6836	5	26262997	26263113	+	0	NA	exon (AT5G65683.1, exon 2 of 2)	exon (AT5G65683.1, exon 2 of 2)	1735	AT5G65683.1	836695	At.44174	NM_148162		AT5G65683	-	C3H4 type zinc finger protein	protein-coding
6878	5	26603359	26603486	+	0	NA	exon (AT5G66650.1, exon 2 of 2)	exon (AT5G66650.1, exon 2 of 2)	954	AT5G66650.1	836797	At.8661	NM_126063		AT5G66650	MSN2.3|MSN2_3	hypothetical protein	protein-coding
6895	5	26768669	26768797	+	0	NA	exon (AT5G67070.1, exon 1 of 1)	exon (AT5G67070.1, exon 1 of 1)	713	AT5G67070.1	836842	At.9600	NM_126107		RALFL34	K21H1.3|K21H1_3|ralf-like 34	protein ralf-like 34	protein-coding
6910	5	26855380	26855537	+	0	NA	exon (AT5G67310.1, exon 2 of 2)	exon (AT5G67310.1, exon 2 of 2)	1436	AT5G67300.1	836865	At.252	NM_126130		MYBR1	ARABIDOPSIS THALIANA MYB DOMAIN PROTEIN 44|ATMYB44|ATMYBR1|MYB44|myb domain protein r1	transcription factor MYB44	protein-coding
1607	1	27044628	27044766	+	0	NA	Intergenic	Intergenic	-9483	AT1G71880.1	843519	At.23741	NM_105846		SUC1	ARABIDOPSIS THALIANA SUCROSE-PROTON SYMPORTER 1|ATSUC1|F17M19.3|F17M19_3|SUCROSE-H+ SYMPORTER|sucrose-proton symporter 1	sucrose transport protein SUC1	protein-coding
3788	3	11802302	11802487	+	0	NA	Intergenic	Intergenic	-8343	AT3G30180.1	822709	At.26493	NM_113917		BR6OX2	CYP85A2|brassinosteroid-6-oxidase 2	brassinosteroid-6-oxidase 2	protein-coding
3384	3	4841054	4841241	+	0	NA	Intergenic	Intergenic	-7548	AT3G14440.1	820667	At.26346	NM_112304		NCED3	9-CIS-EPOXYCAROTENOID DIOXYGENASE|ATNCED3|SALT TOLERANT 1|SIS7|STO1|SUGAR INSENSITIVE 7|nine-cis-epoxycarotenoid dioxygenase 3	9-cis-epoxycarotenoid dioxygenase NCED3	protein-coding
3789	3	11803522	11803719	+	0	NA	Intergenic	Intergenic	-7117	AT3G30180.1	822709	At.26493	NM_113917		BR6OX2	CYP85A2|brassinosteroid-6-oxidase 2	brassinosteroid-6-oxidase 2	protein-coding
2312	2	11357808	11357985	+	0	NA	Intergenic	Intergenic	-6903	AT2G26690.1	817210	At.383	NM_179753		AT2G26690	F18A8.6|F18A8_6	nitrate transporter 1.4	protein-coding
3383	3	4840266	4840456	+	0	NA	Intergenic	Intergenic	-6762	AT3G14440.1	820667	At.26346	NM_112304		NCED3	9-CIS-EPOXYCAROTENOID DIOXYGENASE|ATNCED3|SALT TOLERANT 1|SIS7|STO1|SUGAR INSENSITIVE 7|nine-cis-epoxycarotenoid dioxygenase 3	9-cis-epoxycarotenoid dioxygenase NCED3	protein-coding
850	1	10365028	10365197	+	0	NA	Intergenic	Intergenic	-6727	AT1G29660.1	839843	At.17861	NM_102706		AT1G29660	F15D2.21|F15D2_21	GDSL esterase/lipase	protein-coding
6738	5	25174721	25174896	+	0	NA	Intergenic	Intergenic	-6607	AT5G62690.1	836390	At.24202	NM_125664		TUB2	MRG21.11|MRG21_11|tubulin beta chain 2	tubulin beta-2/beta-3 chain	protein-coding
1270	1	22877606	22877735	+	0	NA	Intergenic	Intergenic	-6390	AT1G61890.1	842485	At.10738	NM_104870		AT1G61890	F8K4.9|F8K4_9	MATE efflux family protein	protein-coding
851	1	10365512	10365681	+	0	NA	Intergenic	Intergenic	-6243	AT1G29660.1	839843	At.17861	NM_102706		AT1G29660	F15D2.21|F15D2_21	GDSL esterase/lipase	protein-coding
2122	2	8215426	8215535	+	0	NA	Intergenic	Intergenic	-6151	AT2G18960.1	816413	At.24695	NM_127453		HA1	AHA1|F19F24.16|F19F24_16|H(+)-ATPase 1|OPEN STOMATA 2|OST2|PLASMA MEMBRANE PROTON ATPASE|PMA	H(+)-ATPase 1	protein-coding
5732	5	4189262	4189414	+	0	NA	Intergenic	Intergenic	-6032	AT5G13170.1	831156	At.46857	NM_121320		SAG29	T19L5.130|T19L5_130|senescence-associated gene 29	senescence-associated protein 29	protein-coding
1517	1	26246615	26246778	+	0	NA	Intergenic	Intergenic	-5988	AT1G69760.1	843312	At.46680	NM_105644		AT1G69760	T6C23.4|T6C23_4	hypothetical protein	protein-coding
4701	4	10000313	10000488	+	0	NA	Intergenic	Intergenic	-5980	AT4G18010.1	827526	At.2057	NM_117911		5PTASE2	4|5)P3 5-PHOSPHATASE II|AT5PTASE2|INOSITOL POLYPHOSPHATE 5-PHOSPHATASE II|INOSITOL(1|IP5PII|T6K21.190|T6K21_190|myo-inositol polyphosphate 5-phosphatase 2	Type I inositol-1,4,5-trisphosphate 5-phosphatase 2	protein-coding
1608	1	27048184	27048311	+	0	NA	Intergenic	Intergenic	-5933	AT1G71880.1	843519	At.23741	NM_105846		SUC1	ARABIDOPSIS THALIANA SUCROSE-PROTON SYMPORTER 1|ATSUC1|F17M19.3|F17M19_3|SUCROSE-H+ SYMPORTER|sucrose-proton symporter 1	sucrose transport protein SUC1	protein-coding
6261	5	18376772	18376947	+	0	NA	Intergenic	Intergenic	-5868	AT5G45340.2	834570	At.9625	NM_123902		CYP707A3	K9E15.12|K9E15_12|cytochrome P450|family 707|polypeptide 3|subfamily A	abscisic acid 8'-hydroxylase 3	protein-coding
3654	3	8595384	8595583	+	0	NA	Intergenic	Intergenic	-5770	AT3G23810.1	821964	At.24845	NM_113286		SAHH2	ATSAHH2|S-ADENOSYL-L-HOMOCYSTEINE (SAH) HYDROLASE 2|S-adenosyl-l-homocysteine (SAH) hydrolase 2	adenosylhomocysteinase 2	protein-coding
6221	5	17655812	17655921	+	0	NA	Intergenic	Intergenic	-5735	AT5G43890.1	834411	At.64272	NM_123756		YUC5	F6B6.3|F6B6_3|SUPER1|SUPPRESSOR OF ER 1|YUCCA5	probable indole-3-pyruvate monooxygenase YUCCA5	protein-coding
4643	4	9443309	9443478	+	0	NA	Intergenic	Intergenic	-5721	AT4G16780.1	827384	At.24419	NM_117780		HB-2	ARABIDOPSIS THALIANA HOMEOBOX PROTEIN 2|ATHB-2|ATHB2|DL4415W|FCAALL.101|HAT4|homeobox protein 2	homeobox protein 2	protein-coding
6052	5	8923444	8923572	+	0	NA	Intergenic	Intergenic	-5669	AT5G25615.1	3770724				AT5G25615	-	pseudo	pseudo
2642	2	15967247	15967435	+	0	NA	Intergenic	Intergenic	-5652	AT2G38120.1	818390	At.24295	NM_129368		AUX1	AUXIN RESISTANT 1|F16M14.5|F16M14_5|MAP1|MODIFIER OF ARF7/NPH4 PHENOTYPES 1|PIR1|WAV5|WAVY ROOTS 5	auxin transporter protein 1	protein-coding
1263	1	22761855	22762036	+	0	NA	Intergenic	Intergenic	-5645	AT1G61660.4	842462	At.22850	NM_104847		AT1G61660	T13M11.1|T13M11_1	transcription factor bHLH112	protein-coding
6231	5	17792698	17792892	+	0	NA	Intergenic	Intergenic	-5574	AT5G44190.1	834442	At.19638	NM_123786		GLK2	ATGLK2|GBF'S PRO-RICH REGION-INTERACTING FACTOR 2|GOLDEN2-like 2|GPRI2|MLN1.11|MLN1_11	transcription activator GLK2	protein-coding
1503	1	26210565	26210738	+	0	NA	Intergenic	Intergenic	-5573	AT1G69690.1	843305	At.23272	NM_105637		AT1G69690	T6C23.11|T6C23_11	transcription factor TCP15	protein-coding
1327	1	23905511	23905682	+	0	NA	Intergenic	Intergenic	-5523	AT1G64390.1	842747	At.17827	NM_105114		GH9C2	AtGH9C2|F15H21.9|F15H21_9|glycosyl hydrolase 9C2	glycosyl hydrolase 9C2	protein-coding
5731	5	4188702	4188843	+	0	NA	Intergenic	Intergenic	-5466	AT5G13170.1	831156	At.46857	NM_121320		SAG29	T19L5.130|T19L5_130|senescence-associated gene 29	senescence-associated protein 29	protein-coding
1019	1	17291040	17291201	+	0	NA	Intergenic	Intergenic	-5450	AT1G47128.1	841122	At.43549	NM_103612		RD21	F2G19.31|F2G19_31|RD21A|RESPONSIVE TO DEHYDRATION 21A|responsive to dehydration 21	cysteine proteinase RD21a	protein-coding
6055	5	8993138	8993323	+	0	NA	Intergenic	Intergenic	-5443	AT5G25810.1	832650	At.5373	NM_122482		tny	F18A17.60|F18A17_60|TINY	ethylene-responsive transcription factor TINY	protein-coding
3382	3	4838911	4839082	+	0	NA	Intergenic	Intergenic	-5397	AT3G14440.1	820667	At.26346	NM_112304		NCED3	9-CIS-EPOXYCAROTENOID DIOXYGENASE|ATNCED3|SALT TOLERANT 1|SIS7|STO1|SUGAR INSENSITIVE 7|nine-cis-epoxycarotenoid dioxygenase 3	9-cis-epoxycarotenoid dioxygenase NCED3	protein-coding
503	1	6445115	6445298	+	0	NA	Intergenic	Intergenic	-5388	AT1G18710.1	838453	At.10906	NM_101729		MYB47	AtMYB47|F6A14.18|F6A14_18|myb domain protein 47	myb domain protein 47	protein-coding
6082	5	9966532	9966709	+	0	NA	Intergenic	Intergenic	-5356	AT5G27930.2	832860	At.20140	NM_122675		AT5G27930	F15F15.3	putative protein phosphatase 2C 73	protein-coding
2311	2	11356268	11356411	+	0	NA	Intergenic	Intergenic	-5346	AT2G26690.1	817210	At.383	NM_179753		AT2G26690	F18A8.6|F18A8_6	nitrate transporter 1.4	protein-coding
6020	5	8579279	8579418	+	0	NA	Intergenic	HELITRONY3|RC|Helitron	-5317	AT5G24920.1	832562	At.54984	NM_122401		GDU5	AtGDU5|F6A4.130|F6A4_130|glutamine dumper 5	glutamine dumper 5	protein-coding
6541	5	22794251	22794440	+	0	NA	Intergenic	Intergenic	-5162	AT5G56300.1	835729	At.29396	NM_125013		GAMT2	MCD7.2|MCD7_2|gibberellic acid methyltransferase 2	gibberellic acid methyltransferase 2	protein-coding
1516	1	26245773	26245893	+	0	NA	Intergenic	Intergenic	-5125	AT1G69760.1	843312	At.46680	NM_105644		AT1G69760	T6C23.4|T6C23_4	hypothetical protein	protein-coding
6038	5	8730863	8731050	+	0	NA	Intergenic	HELITRONY1B|RC|Helitron	-5118	AT5G25220.2	832593	At.5376	NM_122431		KNAT3	F21J6.18|F21J6_18|KNAT3 HOMEOBOX PROTEIN|KNOTTED1-like homeobox gene 3	homeobox protein knotted-1-like 3	protein-coding
332	1	4535016	4535195	+	0	NA	Intergenic	Intergenic	-5042	AT1G13250.1	837885	At.22620	NM_101196		GATL3	T6J4.1|T6J4_1|galacturonosyltransferase-like 3	putative galacturonosyltransferase-like 3	protein-coding
885	1	10954393	10954564	+	0	NA	Intergenic	Intergenic	-5020	AT1G30820.1	839964	At.23640	NM_102819		AT1G30820	T17H7.12|T17H7_12	CTP synthase-like protein	protein-coding
2453	2	13247153	13247336	+	0	NA	Intergenic	Intergenic	-4975	AT2G31083.1	817663	At.49363	NM_179828		CLE5	CLAVATA3/ESR-RELATED 5	protein CLAVATA3/ESR-related 5	protein-coding
2780	2	17485343	17485537	+	0	NA	Intergenic	Intergenic	-4965	AT2G41900.1	818790	At.23950	NM_129754		AT2G41900	T6D20.20|T6D20_20	zinc finger CCCH domain-containing protein 30	protein-coding
5043	4	14780923	14781121	+	0	NA	Intergenic	Intergenic	-4964	AT4G30190.2	829142	At.23014	NM_119165		HA2	AHA2|F9N11.40|F9N11_40|H(+)-ATPase 2|P-TYPE H(+)-ATPASE ISOFORM 2|PLASMA MEMBRANE PROTON ATPASE 2|PMA2	H(+)-ATPase 2	protein-coding
1978	2	643045	643155	+	0	NA	Intergenic	Intergenic	-4944	AT2G02450.1	814775	At.12993	NM_126301		NAC035	ANAC035|Arabidopsis NAC domain containing protein 34|LONG VEGETATIVE PHASE 1|LOV1|NAC domain containing protein 35|anac034	protein LONG VEGETATIVE PHASE 1	protein-coding
4220	3	22367424	22367616	+	0	NA	Intergenic	Intergenic	-4941	AT3G60520.1	825223	At.34431	NM_115916		AT3G60520	-	hypothetical protein	protein-coding
4642	4	9441986	9442171	+	0	NA	Intergenic	Intergenic	-4906	AT4G16770.1	827383	At.4439	NM_117779		AT4G16770	DL4410C|FCAALL.233	iron ion binding / oxidoreductase	protein-coding
6081	5	9966082	9966246	+	0	NA	Intergenic	Intergenic	-4900	AT5G27930.2	832860	At.20140	NM_122675		AT5G27930	F15F15.3	putative protein phosphatase 2C 73	protein-coding
3653	3	8594565	8594650	+	0	NA	Intergenic	VANDAL18|DNA|MuDR	-4894	AT3G23810.1	821964	At.24845	NM_113286		SAHH2	ATSAHH2|S-ADENOSYL-L-HOMOCYSTEINE (SAH) HYDROLASE 2|S-adenosyl-l-homocysteine (SAH) hydrolase 2	adenosylhomocysteinase 2	protein-coding
5315	4	17734543	17734716	+	0	NA	Intergenic	Intergenic	-4885	AT4G37750.1	829931	At.1556	NM_119937		ANT	AINTEGUMENTA|CKC|CKC1|COMPLEMENTING A PROTEIN KINASE C MUTANT 1|DRAGON|DRG|T28I19.30|T28I19_30	AP2-like ethylene-responsive transcription factor ANT	protein-coding
6253	5	18213671	18213746	+	0	NA	Intergenic	Intergenic	-4878	AT5G45100.2	834543	At.26652	NM_123878		AT5G45100	K17O22.9|K17O22_9	BOI-related protein 1	protein-coding
3724	3	9718048	9718062	+	0	NA	Intergenic	Intergenic	-4869	AT3G26511.1	6240254		NM_001125231		AT3G26511	-	hypothetical protein	protein-coding
2758	2	17245206	17245399	+	0	NA	Intergenic	Intergenic	-4862	AT2G41370.1	818735	At.43967	NM_129700		BOP2	BLADE ON PETIOLE2|F13H10.8|F13H10_8	NPR1 like protein BOP2	protein-coding
6356	5	20085876	20085978	+	0	NA	Intergenic	Intergenic	-4849	AT5G49520.1	835012	At.27170	NM_124329		WRKY48	ARABIDOPSIS THALIANA WRKY DNA-BINDING PROTEIN 48|ATWRKY48|K6M13.6|K6M13_6|WRKY DNA-binding protein 48	putative WRKY transcription factor 48	protein-coding
745	1	8987818	8987960	+	0	NA	Intergenic	Intergenic	-4848	AT1G25560.1	839143	At.17318	NM_102367		TEM1	EDF1|ETHYLENE RESPONSE DNA BINDING FACTOR 1|F2J7.3|F2J7_3|TEMPRANILLO 1	AP2/ERF and B3 domain-containing transcription repressor TEM1	protein-coding
4644	4	9444187	9444380	+	0	NA	Intergenic	Intergenic	-4831	AT4G16780.1	827384	At.24419	NM_117780		HB-2	ARABIDOPSIS THALIANA HOMEOBOX PROTEIN 2|ATHB-2|ATHB2|DL4415W|FCAALL.101|HAT4|homeobox protein 2	homeobox protein 2	protein-coding
6667	5	24392175	24392250	+	0	NA	Intergenic	Intergenic	-4811	AT5G60690.1	836190	At.7238	NM_125462		REV	HOMEODOMAIN-LEUCINE ZIPPER PROTEIN|HOMEODOMAIN-LEUCINE ZIPPER PROTEIN IFL1|IFL|IFL1|INTERFASCICULAR FIBERLESS|INTERFASCICULAR FIBERLESS 1|MUP24.16|MUP24_16|REVOLUTA	homeobox-leucine zipper protein REVOLUTA	protein-coding
333	1	4537318	4537515	+	0	NA	Intergenic	Intergenic	-4752	AT1G13260.1	837886	At.20558	NM_101197		RAV1	EDF4|ETHYLENE RESPONSE DNA BINDING FACTOR 4|T6J4.2|T6J4_2|related to ABI3/VP1 1	AP2/ERF and B3 domain-containing transcription factor RAV1	protein-coding
1463	1	25732355	25732539	+	0	NA	Intergenic	Intergenic	-4746	AT1G68550.1	843184	At.21149	NM_105526		AT1G68550	T26J14.12|T26J14_12	ethylene-responsive transcription factor ERF118	protein-coding
1240	1	22128360	22128531	+	0	NA	Intergenic	Intergenic	-4743	AT1G60050.1	842299	At.52278	NM_104697		AT1G60050	T2K10.10|T2K10_10	Nodulin MtN21 /EamA-like transporter family protein	protein-coding
1789	1	28700742	28700880	+	0	NA	Intergenic	Intergenic	-4716	AT1G76500.1	843983	At.7934	NM_106300		SOB3	AHL29|AT-hook motif nuclear-localized protein 29|F14G6.10|F14G6_10|SUPPRESSOR OF PHYB-4#3	AT-hook motif nuclear localized protein 29	protein-coding
4518	4	6878749	6878928	+	0	NA	Intergenic	Intergenic	-4713	AT4G11310.1	826733	At.43189	NM_117202		AT4G11310	F8L21.100|F8L21_100	putative cysteine proteinase	protein-coding
2863	2	18369493	18369669	+	0	NA	Intergenic	Intergenic	-4711	AT2G44500.2	819057	At.21825	NM_130013		AT2G44500	F4I1.31	O-fucosyltransferase family protein	protein-coding
5284	4	17535127	17535222	+	0	NA	Intergenic	Intergenic	-4668	AT4G37250.1	829879	At.27846	NM_119888		AT4G37250	AP22.22|AP22_22	putative LRR receptor-like serine/threonine-protein kinase	protein-coding
5267	4	17409422	17409547	+	0	NA	Intergenic	Intergenic	-4643	AT4G36930.1	829847	At.4639	NM_119857		SPT	AP22.25|AP22_25|SPATULA	transcription factor SPATULA	protein-coding
2361	2	12109622	12109785	+	0	NA	Intergenic	Intergenic	-4628	AT2G28350.1	817382	At.13730	NM_128394		ARF10	T1B3.13|T1B3_13|auxin response factor 10	auxin response factor 10	protein-coding
4689	4	9901178	9901346	+	0	NA	Intergenic	Intergenic	-4594	AT4G17800.1	827502	At.20660	NM_117890		AT4G17800	DL4935C|FCAALL.129	putative AT-hook DNA-binding family protein	protein-coding
5967	5	7465773	7465970	+	0	NA	Intergenic	Intergenic	-4572	AT5G22500.1	832311	At.21452	NM_122155		FAR1	MQJ16.4|MQJ16_4|fatty acid reductase 1	fatty acyl-CoA reductase 1	protein-coding
2759	2	17247279	17247460	+	0	NA	Intergenic	Intergenic	-4572	AT2G41380.1	818736	At.43779	NM_129701		AT2G41380	F13H10.7|F13H10_7	S-adenosyl-L-methionine-dependent methyltransferase-like protein	protein-coding
5314	4	17732219	17732382	+	0	NA	Intergenic	Intergenic	-4570	AT4G37740.1	829930	At.2873	NM_119936		GRF2	AtGRF2|T28I19.20|T28I19_20|growth-regulating factor 2	growth-regulating factor 2	protein-coding
1737	1	28323253	28323446	+	0	NA	Intergenic	Intergenic	-4537	AT1G75460.1	843882	At.16258	NM_106200		AT1G75460	F1B16.1|F1B16_1	ATP-dependent protease La domain-containing protein	protein-coding
4870	4	12371572	12371744	+	0	NA	Intergenic	Intergenic	-4536	AT4G23750.2	828475	At.26323	NM_118506		CRF2	F9D16.220|F9D16_220|TARGET OF MONOPTEROS 3|TMO3|cytokinin response factor 2	ethylene-responsive transcription factor CRF2	protein-coding
3766	3	10861062	10861248	+	0	NA	Intergenic	Intergenic	-4531	AT3G28857.1	2745895	At.47880	NM_202643		AT3G28857	-	protein PACLOBUTRAZOL RESISTANCE 5	protein-coding
1676	1	27664556	27664735	+	0	NA	Intergenic	Intergenic	-4507	AT1G73600.2	843694	At.43548	NM_106018		AT1G73600	F6D5.1|F6D5_1	putative phosphoethanolamine N-methyltransferase 3	protein-coding
886	1	10956381	10956509	+	0	NA	Intergenic	Intergenic	-4496	AT1G30825.1	839965	At.21573	NM_102820		DIS2	ACTIN-RELATED PROTEIN C2A|ARPC2A|DISTORTED TRICHOMES 2	actin-related protein C2A	protein-coding
4385	4	721984	722141	+	0	NA	Intergenic	Intergenic	-4483	AT4G01680.3	826853	At.3837	NM_116398		MYB55	AtMYB55|T15B16.4|T15B16_4|myb domain protein 55	putative transcription factor MYB55	protein-coding
6456	5	21733677	21733874	+	0	NA	Intergenic	Intergenic	-4475	AT5G53500.1	835432	At.29552	NM_124730		AT5G53500	MNC6.4|MNC6_4	transducin/WD40 domain-containing protein	protein-coding
2640	2	15940156	15940321	+	0	NA	Intergenic	Intergenic	-4473	AT2G38090.1	818387	At.46819	NM_129365		AT2G38090	F16M14.2|F16M14_2	Duplicated homeodomain-like superfamily protein	protein-coding
1527	1	26305124	26305296	+	0	NA	Intergenic	Intergenic	-4418	AT1G69860.1	843322	At.52455	NM_105654		AT1G69860	T17F3.11|T17F3_11	putative peptide/nitrate transporter	protein-coding
3603	3	7988938	7989133	+	0	NA	Intergenic	Intergenic	-4408	AT3G22540.1	821825	At.49621	NM_113153		AT3G22540	-	hypothetical protein	protein-coding
5866	5	6170308	6170487	+	0	NA	Intergenic	Intergenic	-4406	AT5G18560.1	831974	At.49752	NM_121861		PUCHI	T28N17.40|T28N17_40	ethylene response factor PUCHI	protein-coding
3385	3	4845352	4845421	+	0	NA	Intergenic	Intergenic	-4402	AT3G14450.1	820668	At.53311	NM_112305		CID9	CTC-interacting domain 9	CTC-interacting domain 9 protein	protein-coding
2576	2	15100275	15100468	+	0	NA	Intergenic	Intergenic	-4390	AT2G35950.1	818168	At.37609	NM_129154		EDA12	F11F19.14|F11F19_14|embryo sac development arrest 12	protein EMBRYO SAC DEVELOPMENT ARREST 12	protein-coding
543	1	6882414	6882592	+	0	NA	Intergenic	Intergenic	-4376	AT1G19850.1	838573	At.10494	NM_101840		MP	ARF5|AUXIN RESPONSE FACTOR 5|F6F9.10|F6F9_10|IAA24|MONOPTEROS|TRANSCRIPTION FACTOR IAA24|indole-3-acetic acid inducible 24	auxin response factor 5	protein-coding
4392	4	740488	740604	+	0	NA	Intergenic	Intergenic	-4375	AT4G01720.1	828001	At.27833	NM_116402		WRKY47	AtWRKY47|T15B16.12|T15B16_12	putative WRKY transcription factor 47	protein-coding
2597	2	15375110	15375306	+	0	NA	Intergenic	Intergenic	-4362	AT2G36680.2	818240	At.28638	NM_179937		AT2G36680	F13K3.8|F13K3_8|VPS37-2	vacuolar protein-sorting-associated protein 37-2	protein-coding
3171	3	2007650	2007825	+	0	NA	Intergenic	Intergenic	-4342	AT3G06500.1	819828	At.40513	NM_111526		AT3G06500	F5E6.17|F5E6_17	protein alkaline/neutral invertase C	protein-coding
6357	5	20086352	20086549	+	0	NA	Intergenic	Intergenic	-4326	AT5G49520.1	835012	At.27170	NM_124329		WRKY48	ARABIDOPSIS THALIANA WRKY DNA-BINDING PROTEIN 48|ATWRKY48|K6M13.6|K6M13_6|WRKY DNA-binding protein 48	putative WRKY transcription factor 48	protein-coding
504	1	6446205	6446333	+	0	NA	Intergenic	Intergenic	-4325	AT1G18710.1	838453	At.10906	NM_101729		MYB47	AtMYB47|F6A14.18|F6A14_18|myb domain protein 47	myb domain protein 47	protein-coding
4221	3	22368812	22368996	+	0	NA	Intergenic	Intergenic	-4311	AT3G60530.1	825224	At.20781	NM_115917		GATA4	GATA transcription factor 4	GATA transcription factor 4	protein-coding
6737	5	25172150	25172335	+	0	NA	Intergenic	Intergenic	-4299	AT5G62680.1	836389	At.28239	NM_125663		AT5G62680	MRG21.10|MRG21_10	glucosinolate transporter-2	protein-coding
2911	2	18723176	18723367	+	0	NA	Intergenic	Intergenic	-4290	AT2G45430.1	819151	At.36631	NM_130105		AHL22	AT-hook motif nuclear-localized protein 22|F4L23.6	AT-hook motif nuclear-localized protein 22	protein-coding
4169	3	21554684	21554871	+	0	NA	Intergenic	Intergenic	-4283	AT3G58193.1	3769736				AT3G58193	67305.SNORNA00001	ncRNA	ncRNA
1387	1	24743857	24744016	+	0	NA	Intergenic	Intergenic	-4259	AT1G66350.1	842953	At.26400	NM_105306		RGL1	RGA-like 1|RGL|T27F4.10|T27F4_10	DELLA protein RGL1	protein-coding
2354	2	12019815	12019987	+	0	NA	Intergenic	Intergenic	-4248	AT2G28200.1	817366	At.39	NM_128380		AT2G28200	T3B23.13|T3B23_13	zinc finger protein ZAT5	protein-coding
5316	4	17735167	17735366	+	0	NA	Intergenic	Intergenic	-4248	AT4G37750.1	829931	At.1556	NM_119937		ANT	AINTEGUMENTA|CKC|CKC1|COMPLEMENTING A PROTEIN KINASE C MUTANT 1|DRAGON|DRG|T28I19.30|T28I19_30	AP2-like ethylene-responsive transcription factor ANT	protein-coding
3618	3	8168264	8168463	+	0	NA	Intergenic	ATREP10D|RC|Helitron	-4234	AT3G23000.1	821874	At.389	NM_113200		CIPK7	ATSR2|ATSRPK1|CBL-interacting protein kinase 7|PKS7|SNF1-RELATED PROTEIN KINASE 3.10|SnRK3.10	CBL-interacting serine/threonine-protein kinase 7	protein-coding
4795	4	11596378	11596526	+	0	NA	Intergenic	Intergenic	-4214	AT4G21850.2	828273	At.22710	NM_118305		MSRB9	ATMSRB9|T8O5.60|T8O5_60|methionine sulfoxide reductase B9	methionine sulfoxide reductase B9	protein-coding
5870	5	6188192	6188321	+	0	NA	Intergenic	Intergenic	-4187	AT5G18610.1	831979	At.54903	NM_121866		AT5G18610	T28N17.90|T28N17_90	protein kinase family protein	protein-coding
4700	4	9998504	9998704	+	0	NA	Intergenic	Intergenic	-4184	AT4G18010.1	827526	At.2057	NM_117911		5PTASE2	4|5)P3 5-PHOSPHATASE II|AT5PTASE2|INOSITOL POLYPHOSPHATE 5-PHOSPHATASE II|INOSITOL(1|IP5PII|T6K21.190|T6K21_190|myo-inositol polyphosphate 5-phosphatase 2	Type I inositol-1,4,5-trisphosphate 5-phosphatase 2	protein-coding
3965	3	18906273	18906368	+	0	NA	Intergenic	Intergenic	-4168	AT3G50850.1	824249	At.28528	NM_114945		AT3G50850	-	putative methyltransferase family protein	protein-coding
1283	1	23124500	23124623	+	0	NA	Intergenic	Intergenic	-4144	AT1G62480.1	842545	At.23177	NM_104927		AT1G62480	T3P18.4|T3P18_4	vacuolar calcium-binding protein-like protein	protein-coding
4517	4	6877579	6877776	+	0	NA	Intergenic	Intergenic	-4136	AT4G11300.1	826732	At.33576	NM_117201		AT4G11300	F8L21.90|F8L21_90	hypothetical protein	protein-coding
6039	5	8731906	8731973	+	0	NA	Intergenic	Intergenic	-4135	AT5G25220.2	832593	At.5376	NM_122431		KNAT3	F21J6.18|F21J6_18|KNAT3 HOMEOBOX PROTEIN|KNOTTED1-like homeobox gene 3	homeobox protein knotted-1-like 3	protein-coding
2376	2	12205667	12205865	+	0	NA	Intergenic	Intergenic	-4130	AT2G28520.1	817400	At.38612	NM_179791		VHA-A1	T17D12.8|T17D12_8|vacuolar proton ATPase A1	vacuolar proton ATPase A1	protein-coding
2375	2	12204813	12204968	+	0	NA	Intergenic	Intergenic	-4125	AT2G28510.1	817399	At.28359	NM_128411		AT2G28510	T17D12.7|T17D12_7	Dof zinc finger protein DOF2.1	protein-coding
951	1	12135012	12135211	+	0	NA	Intergenic	Intergenic	-4117	AT1G33450.1	840238				AT1G33450	F10C21.12|F10C21_12	pseudo	pseudo
331	1	4534082	4534255	+	0	NA	Intergenic	Intergenic	-4105	AT1G13250.1	837885	At.22620	NM_101196		GATL3	T6J4.1|T6J4_1|galacturonosyltransferase-like 3	putative galacturonosyltransferase-like 3	protein-coding
812	1	9917844	9918026	+	0	NA	Intergenic	Intergenic	-4098	AT1G28310.1	839725	At.40918	NM_102596		AT1G28310	F3H9.4|F3H9_4	Dof zinc finger protein DOF1.4	protein-coding
1262	1	22760320	22760468	+	0	NA	Intergenic	Intergenic	-4094	AT1G61660.4	842462	At.22850	NM_104847		AT1G61660	T13M11.1|T13M11_1	transcription factor bHLH112	protein-coding
1227	1	21915602	21915739	+	0	NA	Intergenic	Intergenic	-4075	AT1G59650.1	842255	At.456	NM_104658		CW14	T30E16.22|T30E16_22	protein CW14	protein-coding
3949	3	18821890	18822076	+	0	NA	Intergenic	Intergenic	-4057	AT3G50665.1	3769697				AT3G50665	67272.TRNA-GLU-1	tRNA	tRNA
3917	3	18518397	18518579	+	0	NA	Intergenic	Intergenic	-4022	AT3G49950.1	824157	At.50260	NM_114855		AT3G49950	-	scarecrow-like protein 32	protein-coding
5379	4	18320554	18320749	+	0	NA	Intergenic	Intergenic	-4010	AT4G39400.1	830095	At.27898	NM_120100		BRI1	ATBRI1|BIN1|BR INSENSITIVE 1|BRASSINOSTEROID INSENSITIVE 1|CABBAGE 2|CBB2|DWARF 2|DWF2|F23K16.30|F23K16_30	protein brassinosteroid insensitive 1	protein-coding
1736	1	28322330	28322432	+	0	NA	Intergenic	Intergenic	-4006	AT1G75450.2	843881	At.16253	NM_106199		CKX5	ARABIDOPSIS THALIANA CYTOKININ OXIDASE 5|ATCKX5|ATCKX6|CYTOKININ OXIDASE 6|F1B16.2|F1B16_2|cytokinin oxidase 5	cytokinin dehydrogenase 5	protein-coding
1590	1	26777639	26777796	+	0	NA	Intergenic	Intergenic	-3992	AT1G71002.1	6240652				MIR858A	microRNA858A	ncRNA	ncRNA
3723	3	9717086	9717265	+	0	NA	Intergenic	ATREP10D|RC|Helitron	-3989	AT3G26511.1	6240254		NM_001125231		AT3G26511	-	hypothetical protein	protein-coding
829	1	10143630	10143821	+	0	NA	Intergenic	Intergenic	-3968	AT1G29060.1	839780	At.40818	NM_102647		AT1G29060	F28N24.23|F28N24_23	Bet1-like protein	protein-coding
1790	1	28701511	28701629	+	0	NA	Intergenic	Intergenic	-3957	AT1G76500.1	843983	At.7934	NM_106300		SOB3	AHL29|AT-hook motif nuclear-localized protein 29|F14G6.10|F14G6_10|SUPPRESSOR OF PHYB-4#3	AT-hook motif nuclear localized protein 29	protein-coding
1239	1	22127555	22127749	+	0	NA	Intergenic	Intergenic	-3950	AT1G60050.1	842299	At.52278	NM_104697		AT1G60050	T2K10.10|T2K10_10	Nodulin MtN21 /EamA-like transporter family protein	protein-coding
5181	4	16586746	16586903	+	0	NA	Intergenic	Intergenic	-3945	AT4G34760.1	829628	At.20686	NM_119642		AT4G34760	F11I11.11	SAUR-like auxin-responsive protein	protein-coding
3602	3	7988556	7988576	+	0	NA	Intergenic	Intergenic	-3939	AT3G22540.1	821825	At.49621	NM_113153		AT3G22540	-	hypothetical protein	protein-coding
5966	5	7464918	7465052	+	0	NA	Intergenic	Intergenic	-3936	AT5G22490.1	832310	At.54948	NM_122154		AT5G22490	MQJ16.3|MQJ16_3	O-acyltransferase (WSD1-like) family protein	protein-coding
6210	5	17447667	17447823	+	0	NA	Intergenic	Intergenic	-3924	AT5G43420.1	834362	At.7156	NM_123708		AT5G43420	MWF20.13|MWF20_13	RING-H2 finger protein	protein-coding
3730	3	9739412	9739465	+	0	NA	Intergenic	Intergenic	-3897	AT3G26530.1	822261				AT3G26530	-	pseudo	pseudo
1499	1	26137874	26138021	+	0	NA	Intergenic	Intergenic	-3889	AT1G69530.2	843288	At.23180	NM_105622		EXPA1	AT-EXP1|ATEXP1|ATEXPA1|ATHEXP ALPHA 1.2|EXP1|EXPANSIN 1|F10D13.18|F10D13_18|expansin A1	expansin A1	protein-coding
6292	5	18998755	18998906	+	0	NA	Intergenic	Intergenic	-3889	AT5G46830.1	834727	At.28311	NM_124054		NIG1	ATNIG1|MZA15.1|NACL-INDUCIBLE GENE 1|NACL-inducible gene 1	calcium-binding transcription factor NIG1	protein-coding
3655	3	8599495	8599621	+	0	NA	Intergenic	Intergenic	-3886	AT3G23820.1	821965	At.24934	NM_113287		GAE6	UDP-D-glucuronate 4-epimerase 6	UDP-D-glucuronate 4-epimerase 6	protein-coding
1591	1	26778898	26779033	+	0	NA	Intergenic	Intergenic	-3874	AT1G71010.1	843440	At.22900	NM_105770		FAB1C	F23N20.21|FORMS APLOID AND BINUCLEATE CELLS 1C	1-phosphatidylinositol-4-phosphate 5-kinase	protein-coding
6220	5	17607002	17607198	+	0	NA	Intergenic	Intergenic	-3872	AT5G43810.2	834403	At.11438	NM_123748		ZLL	AGO10|ARGONAUTE 10|ARGONAUTE PROTEIN 10|MQD19.17|MQD19_17|PINHEAD|PNH|ZWILLE	eIF2C family protein Argonaute10	protein-coding
6457	5	21734915	21735067	+	0	NA	Intergenic	Intergenic	-3858	AT5G53510.1	835433	At.55524	NM_124731		OPT9	ATOPT9|MNC6.5|MNC6_5|oligopeptide transporter 9	oligopeptide transporter 9	protein-coding
4531	4	7225087	7225252	+	0	NA	Intergenic	ATREP11|RC|Helitron	-3841	AT4G12050.1	826813	At.33511	NM_117275		AT4G12050	F16J13.120|F16J13_120	putative AT-hook DNA-binding family protein	protein-coding
4151	3	21366988	21367174	+	0	NA	Intergenic	Intergenic	-3822	AT3G57670.1	824936	At.28310	NM_115627		NTT	NO TRANSMITTING TRACT|WIP domain protein 2|WIP2	transcription factor NO TRANSMITTING TRACT	protein-coding
3948	3	18820965	18821147	+	0	NA	Intergenic	Intergenic	-3812	AT3G50660.1	824229	At.26401	NM_114926		DWF4	CLM|CLOMAZONE-RESISTANT|CYP90B1|CYTOCHROME P450 90B1|DWARF 4|PARTIALLY SUPPRESSING COI1 INSENSITIVITY TO JA 1|PSC1|SAV1|SHADE AVOIDANCE 1|SNP2|STEROID 22-ALPHA-HYDROXYLASE|SUPPRESSOR OF NPH4 2	cytochrome P450 90B1	protein-coding
4	1	19260	19442	+	0	NA	Intergenic	Intergenic	-3795	AT1G01040.1	839574	At.22088	NM_099986		DCL1	ABNORMAL SUSPENSOR 1|ASU1|ATDCL1|CAF|CARPEL FACTORY|DICER-LIKE 1|EMB60|EMB76|EMBRYO DEFECTIVE 60|EMBRYO DEFECTIVE 76|SHORT INTEGUMENTS 1|SIN1|SUS1|SUSPENSOR 1|T25K16.4|T25K16_4|dicer-like 1	endoribonuclease Dicer-like 1	protein-coding
1175	1	20816546	20816710	+	0	NA	Intergenic	Intergenic	-3788	AT1G55690.1	842018	At.21485	NM_104445		AT1G55690	F20N2.11	Sec14p-like phosphatidylinositol transfer family protein	protein-coding
2810	2	17752291	17752416	+	0	NA	Intergenic	Intergenic	-3787	AT2G42620.1	818862	At.21231	NM_129823		MAX2	F14N22.11|F14N22_11|MORE AXILLARY BRANCHES 2|ORE9|ORESARA 9|PLEIOTROPIC PHOTOSIGNALING|PPS	F-box leucine-rich repeat family protein MAX2	protein-coding
5968	5	7466581	7466770	+	0	NA	Intergenic	Intergenic	-3768	AT5G22500.1	832311	At.21452	NM_122155		FAR1	MQJ16.4|MQJ16_4|fatty acid reductase 1	fatty acyl-CoA reductase 1	protein-coding
1836	1	29360408	29360564	+	0	NA	Intergenic	Intergenic	-3763	AT1G78080.1	844143	At.25524	NM_106457		RAP2.4	F28K19.29|F28K19_29|related to AP2 4	ethylene-responsive transcription factor RAP2-4	protein-coding
5010	4	14358765	14358958	+	0	NA	Intergenic	Intergenic	-3758	AT4G29130.1	829034	At.24726	NM_119057		HXK1	ARABIDOPSIS THALIANA HEXOKINASE 1|ATHXK1|F19B15.160|F19B15_160|GIN2|GLUCOSE INSENSITIVE 2|HEXOKINASE|hexokinase 1	hexokinase 1	protein-coding
3790	3	11806902	11807100	+	0	NA	Intergenic	Intergenic	-3736	AT3G30180.1	822709	At.26493	NM_113917		BR6OX2	CYP85A2|brassinosteroid-6-oxidase 2	brassinosteroid-6-oxidase 2	protein-coding
3872	3	17704486	17704649	+	0	NA	Intergenic	Intergenic	-3734	AT3G47960.1	823951	At.20263	NM_114665		AT3G47960	-	glucosinolate transporter 1	protein-coding
1992	2	980976	981145	+	0	NA	Intergenic	Intergenic	-3723	AT2G03240.1	814853	At.41419	NM_126375		AT2G03240	T18E12.9|T18E12_9	EXS (ERD1/XPR1/SYG1) family protein	protein-coding
3267	3	3656560	3656748	+	0	NA	Intergenic	Intergenic	-3723	AT3G11590.1	820332	At.17667	NM_111992		AT3G11590	-	hypothetical protein	protein-coding
802	1	9810539	9810696	+	0	NA	Intergenic	Intergenic	-3721	AT1G28110.1	839704	At.48242	NM_102576		SCPL45	F13K9.20|F13K9_20|serine carboxypeptidase-like 45	serine carboxypeptidase-like 45	protein-coding
3266	3	3654968	3655139	+	0	NA	Intergenic	Intergenic	-3721	AT3G11580.1	820331	At.39724	NM_111991		AT3G11580	-	AP2/B3-like transcriptional factor family protein	protein-coding
5823	5	5415045	5415228	+	0	NA	Intergenic	META1|LTR|Copia	-3712	AT5G16560.1	831518	At.6466	NM_121662		KAN	KAN1|KANADI|KANADI 1|MQK4.31|MQK4_31	transcription repressor KAN1	protein-coding
287	1	3773536	3773715	+	0	NA	Intergenic	Intergenic	-3703	AT1G11260.1	837667	At.24793	NM_100998		STP1	ATSTP1|SUGAR TRANSPORTER 1|T28P6.9|T28P6_9|sugar transporter 1	sugar transporter 1	protein-coding
1296	1	23396461	23396642	+	0	NA	Intergenic	Intergenic	-3700	AT1G63090.1	842612	At.17747	NM_104987		PP2-A11	AtPP2-A11|F16M19.16|F16M19_16|phloem protein 2-A11	phloem protein 2-A11	protein-coding
523	1	6636702	6636851	+	0	NA	Intergenic	Intergenic	-3689	AT1G19220.1	838505	At.10488	NM_101780		ARF19	ARF11|AUXIN RESPONSE FACTOR11|IAA22|T29M8.9|T29M8_9|auxin response factor 19|indole-3-acetic acid inducible 22	auxin response factor 19	protein-coding
5324	4	17764278	17764441	+	0	NA	Intergenic	Intergenic	-3683	AT4G37790.1	829935	At.23912	NM_119941		HAT22	HOMEOBOX PROTEIN|T28I19.70|T28I19_70	homeobox-leucine zipper protein HAT22	protein-coding
1803	1	28861733	28861915	+	0	NA	Intergenic	Intergenic	-3676	AT1G76880.1	844023	At.43159	NM_106339		AT1G76880	F7O12.5|F7O12_5	Duplicated homeodomain-like superfamily protein	protein-coding
4476	4	5155576	5155726	+	0	NA	Intergenic	Intergenic	-3672	AT4G08151.1	6241383	At.73518	NM_001125475		AT4G08151	-	hypothetical protein	protein-coding
2808	2	17723671	17723798	+	0	NA	Intergenic	Intergenic	-3654	AT2G42570.1	818857	At.14364	NM_129818		TBL39	F14N22.16|F14N22_16|TRICHOME BIREFRINGENCE-LIKE 39	protein trichome birefringence-like 39	protein-coding
5283	4	17534070	17534245	+	0	NA	Intergenic	Intergenic	-3651	AT4G37250.1	829879	At.27846	NM_119888		AT4G37250	AP22.22|AP22_22	putative LRR receptor-like serine/threonine-protein kinase	protein-coding
4222	3	22369484	22369648	+	0	NA	Intergenic	Intergenic	-3649	AT3G60530.1	825224	At.20781	NM_115917		GATA4	GATA transcription factor 4	GATA transcription factor 4	protein-coding
1738	1	28324187	28324297	+	0	NA	Intergenic	Intergenic	-3644	AT1G75460.1	843882	At.16258	NM_106200		AT1G75460	F1B16.1|F1B16_1	ATP-dependent protease La domain-containing protein	protein-coding
330	1	4533655	4533751	+	0	NA	Intergenic	Intergenic	-3640	AT1G13250.1	837885	At.22620	NM_101196		GATL3	T6J4.1|T6J4_1|galacturonosyltransferase-like 3	putative galacturonosyltransferase-like 3	protein-coding
4641	4	9440708	9440884	+	0	NA	Intergenic	Intergenic	-3624	AT4G16770.1	827383	At.4439	NM_117779		AT4G16770	DL4410C|FCAALL.233	iron ion binding / oxidoreductase	protein-coding
5189	4	16690228	16690425	+	0	NA	Intergenic	Intergenic	-3623	AT4G35060.1	829658	At.31450	NM_119672		AT4G35060	T12J5.12	heavy metal transport/detoxification domain-containing protein	protein-coding
5682	5	3528719	3528865	+	0	NA	Intergenic	Intergenic	-3610	AT5G11100.1	830978	At.54810	NM_121148		SYTD	ATSYTD|NTMC2T2.2|NTMC2TYPE2.2|SYT4|T5K6.90|T5K6_90|synaptotagmin 4	synaptotagmin-4	protein-coding
2379	2	12280756	12280942	+	0	NA	Intergenic	Intergenic	-3604	AT2G28630.1	817412	At.26366	NM_128424		KCS12	3-ketoacyl-CoA synthase 12|T8O18.8|T8O18_8	3-ketoacyl-CoA synthase 12	protein-coding
2226	2	9871216	9871393	+	0	NA	Intergenic	Intergenic	-3603	AT2G23180.1	816850	At.12328	NM_127882		CYP96A1	T20D16.19|T20D16_19|cytochrome P450|family 96|polypeptide 1|subfamily A	cytochrome P450, family 96, subfamily A, polypeptide 1	protein-coding
544	1	6883183	6883369	+	0	NA	Intergenic	Intergenic	-3603	AT1G19850.1	838573	At.10494	NM_101840		MP	ARF5|AUXIN RESPONSE FACTOR 5|F6F9.10|F6F9_10|IAA24|MONOPTEROS|TRANSCRIPTION FACTOR IAA24|indole-3-acetic acid inducible 24	auxin response factor 5	protein-coding
1515	1	26244260	26244358	+	0	NA	Intergenic	Intergenic	-3601	AT1G69760.1	843312	At.46680	NM_105644		AT1G69760	T6C23.4|T6C23_4	hypothetical protein	protein-coding
1950	2	302714	302904	+	0	NA	Intergenic	Intergenic	-3576	AT2G01680.1	814697	At.26721	NM_126229		AT2G01680	T8O11.15|T8O11_15	ankyrin repeat-containing protein	protein-coding
6432	5	21442150	21442314	+	0	NA	Intergenic	Intergenic	-3573	AT5G52882.1	5008305	At.23894	NM_001085278		AT5G52882	-	P-loop containing nucleoside triphosphate hydrolases superfamily protein	protein-coding
428	1	5349646	5349818	+	0	NA	Intergenic	Intergenic	-3566	AT1G15550.1	838125	At.10782	NM_101424		GA3OX1	ARABIDOPSIS THALIANA GIBBERELLIN 3 BETA-HYDROXYLASE 1|ATGA3OX1|GA REQUIRING 4|GA4|GIBBERELLIN 3 BETA-HYDROXYLASE|T16N11.6|T16N11_6|gibberellin 3-oxidase 1	gibberellin 3-beta-dioxygenase 1	protein-coding
3609	3	8104473	8104504	+	0	NA	Intergenic	Intergenic	-3533	AT3G22886.1	3768900				MIR167A	microRNA167A	ncRNA	ncRNA
5004	4	14328760	14328946	+	0	NA	Intergenic	ATREP10B|RC|Helitron	-3525	AT4G29080.1	829029	At.3406	NM_119052		PAP2	F19B15.110|F19B15_110|IAA27|indole-3-acetic acid inducible 27|phytochrome-associated protein 2	phytochrome-associated protein 2	protein-coding
2389	2	12411663	12411833	+	0	NA	Intergenic	Intergenic	-3513	AT2G28890.1	817438	At.27597	NM_128448		PLL4	F8N16.18|F8N16_18|PROTEIN PHOSPHATASE 2C|poltergeist like 4	protein phosphatase 2C-like PLL4	protein-coding
3172	3	2008503	2008631	+	0	NA	Intergenic	Intergenic	-3512	AT3G06500.1	819828	At.40513	NM_111526		AT3G06500	F5E6.17|F5E6_17	protein alkaline/neutral invertase C	protein-coding
5073	4	15063212	15063389	+	0	NA	Intergenic	Intergenic	-3506	AT4G30950.1	829220	At.1931	NM_119243		FAD6	CHLOROPLAST PRECURSOR|F6I18.140|F6I18_140|FADC|FATTY ACID DESATURASE C|OMEGA-6 FATTY ACID DESATURASE|SFD4|STEAROYL DESATURASE DEFICIENCY 4|fatty acid desaturase 6	omega-6 fatty acid desaturase	protein-coding
6167	5	16575591	16575791	+	0	NA	Intergenic	Intergenic	-3502	AT5G41401.1	6240394	At.73374	NM_001125878		AT5G41401	-	hypothetical protein	protein-coding
6427	5	21407256	21407452	+	0	NA	Intergenic	HELITRONY3|RC|Helitron	-3498	AT5G52830.1	835360	At.26285	NM_124661		WRKY27	ARABIDOPSIS THALIANA WRKY DNA-BINDING PROTEIN 27|ATWRKY27|MXC20.5|MXC20_5|WRKY DNA-binding protein 27	WRKY DNA-binding protein 27	protein-coding
1589	1	26777110	26777292	+	0	NA	Intergenic	Intergenic	-3476	AT1G71002.1	6240652				MIR858A	microRNA858A	ncRNA	ncRNA
2674	2	16371640	16371834	+	0	NA	Intergenic	Intergenic	-3462	AT2G39210.1	818506	At.27387	NM_129479		AT2G39210	T16B24.15|T16B24_15	major facilitator protein	protein-coding
6784	5	25791693	25791886	+	0	NA	Intergenic	Intergenic	-3444	AT5G64530.1	836574	At.28954	NM_125849		XND1	ANAC104|Arabidopsis NAC domain containing protein 104|MUB3.5|MUB3_5|xylem NAC domain 1	xylem NAC domain 1	protein-coding
6149	5	16320131	16320288	+	0	NA	Intergenic	Intergenic	-3442	AT5G40780.1	834078	At.10818	NM_123443		LHT1	K1B16.3|K1B16_3|LYSINE AND HISTIDINE SPECIFIC TRANSPORTER|lysine histidine transporter 1	Lysine histidine transporter 1	protein-coding
1406	1	25025885	25026080	+	0	NA	Intergenic	Intergenic	-3440	AT1G67040.1	843024	At.52416	NM_105374		AT1G67040	F1O19.10|F1O19_10	hypothetical protein	protein-coding
2370	2	12192894	12193054	+	0	NA	Intergenic	Intergenic	-3432	AT2G28507.1	6240900	At.73748	NM_001124930		AT2G28507	-	hypothetical protein	protein-coding
2080	2	7259931	7260089	+	0	NA	Intergenic	Intergenic	-3430	AT2G16720.1	816173	At.5349	NM_127224		MYB7	ARABIDOPSIS THALIANA MYB DOMAIN PROTEIN 7|ATMYB7|ATY49|T24I21.13|T24I21_13|myb domain protein 7	myb domain protein 7	protein-coding
1368	1	24535400	24535530	+	0	NA	Intergenic	Intergenic	-3421	AT1G65930.1	842905	At.24713	NM_105265		cICDH	F12P19.10|F12P19_10|cytosolic NADP+-dependent isocitrate dehydrogenase	NADP+-dependent isocitrate dehydrogenase	protein-coding
2588	2	15254081	15254257	+	0	NA	Intergenic	Intergenic	-3414	AT2G36380.1	818211	At.43047	NM_129195		PDR6	ATPDR6|F1O11.1|F1O11_1|PLEIOTROPIC DRUG RESISTANCE 6|pleiotropic drug resistance 6	ABC transporter G family member 34	protein-coding
5259	4	17385125	17385261	+	0	NA	Intergenic	Intergenic	-3413	AT4G36890.1	829842	At.31289	NM_119853		IRX14	AP22.51|AP22_51|irregular xylem 14	probable beta-1,4-xylosyltransferase IRX14	protein-coding
6035	5	8711082	8711235	+	0	NA	Intergenic	Intergenic	-3410	AT5G25190.1	832590	At.26169	NM_122428		AT5G25190	F21J6.103|F21J6_103	ethylene-responsive transcription factor ERF003	protein-coding
3947	3	18820602	18820705	+	0	NA	Intergenic	Intergenic	-3409	AT3G50660.1	824229	At.26401	NM_114926		DWF4	CLM|CLOMAZONE-RESISTANT|CYP90B1|CYTOCHROME P450 90B1|DWARF 4|PARTIALLY SUPPRESSING COI1 INSENSITIVITY TO JA 1|PSC1|SAV1|SHADE AVOIDANCE 1|SNP2|STEROID 22-ALPHA-HYDROXYLASE|SUPPRESSOR OF NPH4 2	cytochrome P450 90B1	protein-coding
4088	3	20688164	20688313	+	0	NA	Intergenic	Intergenic	-3409	AT3G55734.1	5008092				MIR393B	AT-MIR393B|microRNA393B	ncRNA	ncRNA
5016	4	14396697	14396864	+	0	NA	Intergenic	Intergenic	-3407	AT4G29190.1	829040	At.4530	NM_119063		AT4G29190	F17A13.10|F17A13_10	protein OXIDATION-RELATED ZINC FINGER 2	protein-coding
1787	1	28677236	28677436	+	0	NA	Intergenic	Intergenic	-3402	AT1G76420.1	843975	At.52530	NM_106292		CUC3	ANAC031|Arabidopsis NAC domain containing protein 31|CUP SHAPED COTYLEDON3|F15M4.8|NAC368	protein CUP-SHAPED COTYLEDON 3	protein-coding
4746	4	10718055	10718161	+	0	NA	Intergenic	Intergenic	-3401	AT4G19700.1	827714	At.27286	NM_118090		RING	T16H5.60|T16H5_60	SBP (S-ribonuclease binding protein) family protein	protein-coding
5319	4	17748591	17748779	+	0	NA	Intergenic	Intergenic	-3399	AT4G37770.1	829933	At.2875	NM_119939		ACS8	1-amino-cyclopropane-1-carboxylate synthase 8|T28I19.50|T28I19_50	1-aminocyclopropane-1-carboxylate synthase 8	protein-coding
4393	4	741429	741620	+	0	NA	Intergenic	Intergenic	-3397	AT4G01720.1	828001	At.27833	NM_116402		WRKY47	AtWRKY47|T15B16.12|T15B16_12	putative WRKY transcription factor 47	protein-coding
3199	3	2351260	2351390	+	0	NA	Intergenic	Intergenic	-3394	AT3G07360.2	819924	At.21635	NM_111615		PUB9	ARABIDOPSIS THALIANA PLANT U-BOX 9|ATPUB9|plant U-box 9	ARM domain-containing protein	protein-coding
5965	5	7464381	7464498	+	0	NA	Intergenic	Intergenic	-3390	AT5G22490.1	832310	At.54948	NM_122154		AT5G22490	MQJ16.3|MQJ16_3	O-acyltransferase (WSD1-like) family protein	protein-coding
1526	1	26303792	26303911	+	0	NA	Intergenic	Intergenic	-3379	AT1G69850.1	843321	At.21144	NM_105653		NRT1:2	ATNRT1:2|NTL1|T17F3.12|T17F3_12|nitrate transporter 1:2	nitrate transporter 1:2	protein-coding
3517	3	6533281	6533391	+	0	NA	Intergenic	Intergenic	-3379	AT3G18950.1	821427	At.38474	NM_112781		AT3G18950	-	WD40 domain-containing protein	protein-coding
5548	5	1516448	1516622	+	0	NA	Intergenic	Intergenic	-3378	AT5G05140.1	830396	At.21997	NM_120596		AT5G05140	MUG13.28	transcription elongation factor (TFIIS) family protein	protein-coding
5025	4	14550697	14550853	+	0	NA	Intergenic	ATREP15|RC|Helitron	-3373	AT4G29710.1	829092	At.65433	NM_119116		AT4G29710	T16L4.220|T16L4_220	Alkaline-phosphatase-like family protein	protein-coding
1125	1	20095073	20095234	+	0	NA	Intergenic	Intergenic	-3369	AT1G53830.1	841820	At.10820	NM_104260		PME2	ATPME2|T18A20.6|T18A20_6|pectin methylesterase 2	pectin methylesterase 2	protein-coding
5182	4	16587771	16587970	+	0	NA	Intergenic	Intergenic	-3359	AT4G34770.1	829629	At.31473	NM_119643		AT4G34770	F11I11.10|F11I11_10	SAUR-like auxin-responsive protein	protein-coding
1323	1	23895516	23895537	+	0	NA	Intergenic	Intergenic	-3353	AT1G64380.1	842745	At.36008	NM_105113		AT1G64380	F15H21.12|F15H21_12	ethylene-responsive transcription factor ERF061	protein-coding
2702	2	16693213	16693406	+	0	NA	Intergenic	Intergenic	-3353	AT2G39980.1	818586	At.21041	NM_129556		AT2G39980	T28M21.14|T28M21_14	HXXXD-type acyl-transferase-like protein	protein-coding
6168	5	16576607	16576785	+	0	NA	Intergenic	Intergenic	-3348	AT5G41410.1	834143	At.24568	NM_123506		BEL1	BELL 1|MYC6.12|MYC6_12	homeobox protein BEL1	protein-coding
4017	3	19599087	19599254	+	0	NA	Intergenic	Intergenic	-3348	AT3G52870.1	824453	At.35252	NM_115147		AT3G52870	-	IQ calmodulin-binding motif family protein	protein-coding
4699	4	9997674	9997861	+	0	NA	Intergenic	Intergenic	-3347	AT4G18010.1	827526	At.2057	NM_117911		5PTASE2	4|5)P3 5-PHOSPHATASE II|AT5PTASE2|INOSITOL POLYPHOSPHATE 5-PHOSPHATASE II|INOSITOL(1|IP5PII|T6K21.190|T6K21_190|myo-inositol polyphosphate 5-phosphatase 2	Type I inositol-1,4,5-trisphosphate 5-phosphatase 2	protein-coding
3786	3	11790469	11790643	+	0	NA	Intergenic	ATREP15|RC|Helitron	-3346	AT3G30170.1	3769062				AT3G30170	-	pseudo	pseudo
1395	1	24898588	24898707	+	0	NA	Intergenic	Intergenic	-3331	AT1G66760.2	842994	At.26433	NM_105347		AT1G66760	F4N21.11|F4N21_11	MATE efflux family protein	protein-coding
5255	4	17365553	17365740	+	0	NA	Intergenic	Intergenic	-3319	AT4G36870.2	829840	At.48946	NM_119851		BLH2	AP22.90|AP22_90|BEL1-like homeodomain 2|SAW1|SAWTOOTH 1	BEL1-like homeodomain protein 2	protein-coding
1753	1	28387009	28387166	+	0	NA	Intergenic	Intergenic	-3319	AT1G75590.1	843894	At.34755	NM_106211		AT1G75590	F10A5.20|F10A5_20	SAUR-like auxin-responsive protein	protein-coding
1111	1	19825478	19825652	+	0	NA	Intergenic	Intergenic	-3313	AT1G53170.1	841751	At.4604	NM_104196		ERF8	ATERF-8|ATERF8|ERF TRANSCRIPTION FACTOR8|ETHYLENE RESPONSE ELEMENT BINDING FACTOR 4|F8L10.19|ethylene response factor 8	ethylene-responsive transcription factor 8	protein-coding
5857	5	6046156	6046345	+	0	NA	Intergenic	Intergenic	-3312	AT5G18270.1	831945	At.23511	NM_121832		ANAC087	Arabidopsis NAC domain containing protein 87|MRG7.23|MRG7_23	NAC domain containing protein 87	protein-coding
1580	1	26739658	26739834	+	0	NA	Intergenic	Intergenic	-3308	AT1G70940.1	843432	At.11573	NM_105762		PIN3	ARABIDOPSIS PIN-FORMED 3|ATPIN3|F15H11.14|F15H11_14|PIN-FORMED 3	auxin efflux carrier component 3	protein-coding
5301	4	17652275	17652409	+	0	NA	Intergenic	Intergenic	-3287	AT4G37553.1	10723018				AT4G37553	-	ncRNA	ncRNA
2643	2	15969607	15969805	+	0	NA	Intergenic	Intergenic	-3287	AT2G38120.1	818390	At.24295	NM_129368		AUX1	AUXIN RESISTANT 1|F16M14.5|F16M14_5|MAP1|MODIFIER OF ARF7/NPH4 PHENOTYPES 1|PIR1|WAV5|WAVY ROOTS 5	auxin transporter protein 1	protein-coding
2377	2	12231731	12231922	+	0	NA	Intergenic	Intergenic	-3283	AT2G28550.1	817403	At.14009	NM_128415		RAP2.7	T17D12.11|T17D12_11|TARGET OF EARLY ACTIVATION TAGGED (EAT) 1|TOE1|related to AP2.7	TARGET OF EARLY ACTIVATION TAGGED 1	protein-coding
840	1	10241656	10241710	+	0	NA	Intergenic	Intergenic	-3283	AT1G29290.1	839803	At.40770	NM_102669		AT1G29290	F28N24.30|F28N24_30	hypothetical protein	protein-coding
1504	1	26212864	26213029	+	0	NA	Intergenic	Intergenic	-3278	AT1G69690.1	843305	At.23272	NM_105637		AT1G69690	T6C23.11|T6C23_11	transcription factor TCP15	protein-coding
1015	1	17280847	17281011	+	0	NA	Intergenic	Intergenic	-3270	AT1G47056.1	841121	At.65985	NM_103611		VFB1	F2G19.16|F2G19_16|VIER F-box proteine 1	VIER F-box protein 1	protein-coding
5730	5	4186477	4186673	+	0	NA	Intergenic	Intergenic	-3269	AT5G13170.1	831156	At.46857	NM_121320		SAG29	T19L5.130|T19L5_130|senescence-associated gene 29	senescence-associated protein 29	protein-coding
1450	1	25690094	25690276	+	0	NA	Intergenic	Intergenic	-3264	AT1G68490.1	843178	At.35516	NM_105520		AT1G68490	T26J14.6|T26J14_6	hypothetical protein	protein-coding
4279	3	22918488	22918688	+	0	NA	Intergenic	Intergenic	-3263	AT3G61890.1	825362	At.25517	NM_116054		HB-12	ARABIDOPSIS THALIANA HOMEOBOX 12|ATHB-12|ATHB12|homeobox 12	homeobox-leucine zipper protein ATHB-12	protein-coding
5423	5	81141	81287	+	0	NA	Intergenic	Intergenic	-3260	AT5G01210.1	831901	At.25363	NM_120199		AT5G01210	F7J8.190|F7J8_190	HXXXD-type acyl-transferase-like protein	protein-coding
581	1	7321250	7321420	+	0	NA	Intergenic	Intergenic	-3253	AT1G20980.1	838692	At.21192	NM_101951		SPL14	ATSPL14|F9H16.3|F9H16_3|FBR6|SPL1R2|SQUAMOSA PROMOTER BINDING PROTEIN-LIKE 14|squamosa promoter binding protein-like 14	squamosa promoter binding-like protein 14	protein-coding
4645	4	9445861	9445862	+	0	NA	Intergenic	Intergenic	-3253	AT4G16780.1	827384	At.24419	NM_117780		HB-2	ARABIDOPSIS THALIANA HOMEOBOX PROTEIN 2|ATHB-2|ATHB2|DL4415W|FCAALL.101|HAT4|homeobox protein 2	homeobox protein 2	protein-coding
1389	1	24760650	24760796	+	0	NA	Intergenic	Intergenic	-3234	AT1G66390.1	842957	At.10924	NM_105310		MYB90	ATMYB90|PAP2|PRODUCTION OF ANTHOCYANIN PIGMENT 2|T27F4.14|T27F4_14|myb domain protein 90	transcription factor MYB90	protein-coding
6458	5	21735586	21735649	+	0	NA	Intergenic	Intergenic	-3232	AT5G53510.1	835433	At.55524	NM_124731		OPT9	ATOPT9|MNC6.5|MNC6_5|oligopeptide transporter 9	oligopeptide transporter 9	protein-coding
1452	1	25698677	25698865	+	0	NA	Intergenic	Intergenic	-3232	AT1G68500.1	843179	At.35514	NM_105521		AT1G68500	T26J14.7|T26J14_7	hypothetical protein	protein-coding
3871	3	17703966	17704162	+	0	NA	Intergenic	Intergenic	-3231	AT3G47960.1	823951	At.20263	NM_114665		AT3G47960	-	glucosinolate transporter 1	protein-coding
431	1	5386651	5386798	+	0	NA	Intergenic	Intergenic	-3228	AT1G15670.1	838136	At.23684	NM_101435		AT1G15670	F7H2.1|F7H2_1	F-box protein KMD	protein-coding
6921	5	26902223	26902409	+	0	NA	Intergenic	Intergenic	-3219	AT5G67411.1	3771574	At.65711	NM_001037090		AT5G67411	-	putative GRAS family transcription factor	protein-coding
1158	1	20522400	20522595	+	0	NA	Intergenic	Intergenic	-3211	AT1G55020.1	841944	At.19984	NM_104376		LOX1	ARABIDOPSIS LIPOXYGENASE 1|ATLOX1|LIPOXYGENASE|lipoxygenase 1	lipoxygenase 1	protein-coding
4999	4	14195800	14195979	+	0	NA	Intergenic	Intergenic	-3207	AT4G28730.1	828994	At.31993	NM_119017		AT4G28730	F16A16.160|F16A16_160	glutaredoxin-C5	protein-coding
1920	1	30380406	30380569	+	0	NA	Intergenic	Intergenic	-3204	AT1G80840.1	844423	At.28188	NM_106732		WRKY40	ATWRKY40|F23A5.19|F23A5_19|WRKY DNA-binding protein 40	putative WRKY transcription factor 40	protein-coding
366	1	4904669	4904841	+	0	NA	Intergenic	Intergenic	-3198	AT1G14350.2	837997	At.12041	NM_101302		FLP	AtMYB124|F14L17.12|F14L17_12|FOUR LIPS|MYB124|myb domain protein 124	MYB transcription factor FLP	protein-coding
2912	2	18724272	18724457	+	0	NA	Intergenic	Intergenic	-3197	AT2G45430.1	819151	At.36631	NM_130105		AHL22	AT-hook motif nuclear-localized protein 22|F4L23.6	AT-hook motif nuclear-localized protein 22	protein-coding
3350	3	4507686	4507862	+	0	NA	Intergenic	Intergenic	-3191	AT3G13750.1	820584	At.21793	NM_112225		BGAL1	beta galactosidase 1|beta-galactosidase 1	beta galactosidase 1	protein-coding
4193	3	22202681	22202864	+	0	NA	Intergenic	Intergenic	-3175	AT3G60120.1	825182	At.49400	NM_115875		BGLU27	beta glucosidase 27	beta glucosidase 27	protein-coding
6575	5	23222857	23222999	+	0	NA	Intergenic	Intergenic	-3158	AT5G57340.1	835839	At.21014	NM_125116		AT5G57340	MJB24.15|MJB24_15	hypothetical protein	protein-coding
2779	2	17483450	17483559	+	0	NA	Intergenic	Intergenic	-3152	AT2G41890.1	818789	At.49579	NM_129753		AT2G41890	T11A7.1|T11A7_1	G-type lectin S-receptor-like serine/threonine-protein kinase SD3-1	protein-coding
6157	5	16388606	16388763	+	0	NA	Intergenic	Intergenic	-3152	AT5G40900.1	834091	At.55285	NM_123455		AT5G40900	MHK7.13|MHK7_13	nucleotide-diphospho-sugar transferase family protein	protein-coding
3529	3	6719160	6719340	+	0	NA	Intergenic	Intergenic	-3151	AT3G19380.1	821472	At.5707	NM_112825		PUB25	plant U-box 25	U-box domain-containing protein 25	protein-coding
6358	5	20087531	20087726	+	0	NA	Intergenic	Intergenic	-3148	AT5G49520.1	835012	At.27170	NM_124329		WRKY48	ARABIDOPSIS THALIANA WRKY DNA-BINDING PROTEIN 48|ATWRKY48|K6M13.6|K6M13_6|WRKY DNA-binding protein 48	putative WRKY transcription factor 48	protein-coding
631	1	7763601	7763796	+	0	NA	Intergenic	Intergenic	-3142	AT1G22030.1	838808	At.41626	NM_102053		AT1G22030	F2E2.8|F2E2_8	hypothetical protein	protein-coding
6131	5	15631347	15631546	+	0	NA	Intergenic	Intergenic	-3140	AT5G39050.1	833897	At.22519	NM_123267		AT5G39050	MXF12.60|MXF12_60	phenolic glucoside malonyltransferase 1	protein-coding
5693	5	3692647	3692804	+	0	NA	Intergenic	Intergenic	-3137	AT5G11530.1	831025	At.43396	NM_121191		EMF1	F15N18.120|F15N18_120|embryonic flower 1	embryonic flower 1	protein-coding
4646	4	9445895	9446061	+	0	NA	Intergenic	Intergenic	-3136	AT4G16780.1	827384	At.24419	NM_117780		HB-2	ARABIDOPSIS THALIANA HOMEOBOX PROTEIN 2|ATHB-2|ATHB2|DL4415W|FCAALL.101|HAT4|homeobox protein 2	homeobox protein 2	protein-coding
5074	4	15063819	15064017	+	0	NA	Intergenic	Intergenic	-3135	AT4G30960.1	829221	At.2154	NM_119244		SIP3	ATCIPK6|CBL-INTERACTING PROTEIN KINASE 6|CIPK6|F6I18.130|F6I18_130|SNF1-RELATED PROTEIN KINASE 3.14|SNRK3.14|SOS3-interacting protein 3	CBL-interacting serine/threonine-protein kinase 6	protein-coding
912	1	11572089	11572281	+	0	NA	Intergenic	Intergenic	-3135	AT1G32170.1	840109	At.10186	NM_102950		XTH30	F3C3.5|F3C3_5|XTR4|XYLOGLUCAN ENDOTRANSGLYCOSYLASE-RELATED PROTEIN|xyloglucan endotransglucosylase/hydrolase 30|xyloglucan endotransglycosylase 4	probable xyloglucan endotransglucosylase/hydrolase 30	protein-coding
6443	5	21622309	21622483	+	0	NA	Intergenic	Intergenic	-3129	AT5G53290.1	835410	At.49792	NM_124708		CRF3	K19E1.9|K19E1_9|cytokinin response factor 3	ethylene-responsive transcription factor CRF3	protein-coding
263	1	3422667	3422852	+	0	NA	Intergenic	Intergenic	-3120	AT1G10410.1	837581	At.42181	NM_100916		AT1G10410	F14N23.31|F14N23_31	hypothetical protein	protein-coding
4544	4	7424764	7424934	+	0	NA	Intergenic	Intergenic	-3111	AT4G12520.1	826864	At.42949	NM_117322		AT4G12520	T1P17.110	Bifunctional inhibitor/lipid-transfer protein/seed storage 2S albumin superfamily protein	protein-coding
3634	3	8306006	8306191	+	0	NA	Intergenic	Intergenic	-3111	AT3G23250.1	821904	At.5348	NM_113226		MYB15	ATMYB15|ATY19|MYB DOMAIN PROTEIN 15|myb domain protein 15	myb domain protein 15	protein-coding
6126	5	15486396	15486580	+	0	NA	Intergenic	Intergenic	-3106	AT5G38700.1	833860	At.30392	NM_123231		AT5G38700	MBB18.26|MBB18_26	hypothetical protein	protein-coding
3268	3	3657183	3657369	+	0	NA	Intergenic	Intergenic	-3101	AT3G11590.1	820332	At.17667	NM_111992		AT3G11590	-	hypothetical protein	protein-coding
5591	5	2179114	2179298	+	0	NA	Intergenic	Intergenic	-3100	AT5G07010.1	830592	At.21805	NM_120783		ST2A	ARABIDOPSIS THALIANA SULFOTRANSFERASE 2A|ATST2A|MOJ9.18|MOJ9_18|sulfotransferase 2A	sulfotransferase 2A	protein-coding
1465	1	25741002	25741175	+	0	NA	Intergenic	Intergenic	-3086	AT1G68560.1	843185	At.24728	NM_105527		XYL1	ALPHA-XYLOSIDASE 1|ATXYL1|F24J5.20|F24J5_20|TRG1|alpha-xylosidase 1|thermoinhibition resistant germination 1	bifunctional alpha-l-arabinofuranosidase/beta-d-xylosidase	protein-coding
1144	1	20176945	20177121	+	0	NA	Intergenic	Intergenic	-3084	AT1G54040.2	841842	At.24494	NM_104281		ESP	EPITHIOSPECIFYING SENESCENCE REGULATOR|ESR|F15I1.12|F15I1_12|TASTY|epithiospecifier protein	epithiospecifier protein	protein-coding
4386	4	726735	726876	+	0	NA	Intergenic	Intergenic	-3082	AT4G01690.2	827991	At.19758	NM_116399		PPOX	HEMG1|PPO1|PROTOPORPHYRINOGEN OXIDASE	protoporphyrinogen oxidase	protein-coding
340	1	4580976	4581116	+	0	NA	Intergenic	Intergenic	-3079	AT1G13360.2	837896	At.44076	NM_148463		AT1G13360	-	hypothetical protein	protein-coding
5006	4	14337827	14338023	+	0	NA	Intergenic	Intergenic	-3075	AT4G29100.1	829031	At.3408	NM_119054		AT4G29100	F19B15.130|F19B15_130	transcription factor bHLH68	protein-coding
1565	1	26601718	26601849	+	0	NA	Intergenic	Intergenic	-3072	AT1G70560.1	843393	At.27817	NM_105724		TAA1	F24J13.13|F24J13_13|SAV3|SHADE AVOIDANCE 3|WEAK ETHYLENE INSENSITIVE 8|WEI8|tryptophan aminotransferase of Arabidopsis 1	L-tryptophan--pyruvate aminotransferase 1	protein-coding
2620	2	15565839	15566000	+	0	NA	Intergenic	Intergenic	-3067	AT2G37050.2	818281	At.13683	NM_129261		AT2G37050	T2N18.19|T2N18_19	putative receptor protein kinase	protein-coding
5177	4	16565947	16566123	+	0	NA	Intergenic	Intergenic	-3066	AT4G34710.1	829623	At.2313	NM_119637		ADC2	ARGININE DECARBOXYLASE|ATADC2|SPE2|T4L20.290|T4L20_290|arginine decarboxylase 2	arginine decarboxylase 2	protein-coding
3601	3	7987609	7987775	+	0	NA	Intergenic	Intergenic	-3065	AT3G22540.1	821825	At.49621	NM_113153		AT3G22540	-	hypothetical protein	protein-coding
2661	2	16253981	16254152	+	0	NA	Intergenic	Intergenic	-3064	AT2G38920.2	818477	At.37231	NM_129450		AT2G38920	T7F6.9|T7F6_9	SPX and C3HC4-type RING finger domain-containing protein	protein-coding
6882	5	26631170	26631359	+	0	NA	Intergenic	Intergenic	-3056	AT5G66700.1	836803	At.51263	NM_126068		HB53	ARABIDOPSIS THALIANA HOMEOBOX 53|ATHB53|HB-8|HOMEOBOX-8|MSN2.9|MSN2_9|homeobox 53	homeobox-leucine zipper protein ATHB-53	protein-coding
5196	4	16743427	16743597	+	0	NA	Intergenic	Intergenic	-3047	AT4G35180.1	829671	At.31436	NM_119684		LHT7	LYS/HIS transporter 7|T12J5.50|T12J5_50	LYS/HIS transporter 7	protein-coding
6689	5	24694064	24694219	+	0	NA	Intergenic	Intergenic	-3046	AT5G61420.1	836263	At.7460	NM_125535		MYB28	AtMYB28|HAG1|HIGH ALIPHATIC GLUCOSINOLATE 1|MFB13.22|MFB13_22|PMG1|PRODUCTION OF METHIONINE-DERIVED GLUCOSINOLATE 1|myb domain protein 28	transcription factor MYB28	protein-coding
2417	2	12788045	12788131	+	0	NA	Intergenic	Intergenic	-3035	AT2G29980.1	817548	At.271	NM_128552		FAD3	ENDOPLASMIC RETICULUM 18:2 DESATURASE|F23F1.10|F23F1_10|OMEGA-3 FATTY ACID DESATURASE|fatty acid desaturase 3	omega-3 fatty acid desaturase	protein-coding
329	1	4533091	4533101	+	0	NA	Intergenic	Intergenic	-3033	AT1G13250.1	837885	At.22620	NM_101196		GATL3	T6J4.1|T6J4_1|galacturonosyltransferase-like 3	putative galacturonosyltransferase-like 3	protein-coding
1462	1	25730654	25730815	+	0	NA	Intergenic	Intergenic	-3033	AT1G68550.1	843184	At.21149	NM_105526		AT1G68550	T26J14.12|T26J14_12	ethylene-responsive transcription factor ERF118	protein-coding
6793	5	25846392	25846577	+	0	NA	Intergenic	Intergenic	-3032	AT5G64660.1	836587	At.19743	NM_125862		CMPG2	ATCMPG2|CYS|MET|MUB3.18|MUB3_18|PRO|and GLY protein 2	putative ubiquitin-protein ligase CMPG2	protein-coding
5054	4	14823609	14823633	+	0	NA	Intergenic	Intergenic	-3029	AT4G30270.1	829150	At.20967	NM_119173		XTH24	F9N11.120|F9N11_120|MERI-5|MERI5B|MERISTEM 5|SEN4|SENESCENCE 4|meristem-5|xyloglucan endotransglucosylase/hydrolase 24	xyloglucan endotransglucosylase/hydrolase protein 24	protein-coding
6497	5	22136610	22136801	+	0	NA	Intergenic	Intergenic	-3027	AT5G54510.1	835539	At.9013	NM_124831		DFL1	DWARF IN LIGHT 1|F24B18.13|F24B18_13|GH3.6	indole-3-acetic acid-amido synthetase GH3.6	protein-coding
247	1	3249187	3249250	+	0	NA	Intergenic	Intergenic	-3022	AT1G09970.1	837531	At.22076	NM_100871		LRR XI-23	F21M12.36|F21M12_36|RLK7|receptor-like kinase 7	leucine-rich receptor-like protein kinase	protein-coding
6590	5	23352355	23352536	+	0	NA	Intergenic	Intergenic	-3019	AT5G57660.1	835872	At.20797	NM_125149		COL5	ATCOL5|CONSTANS-like 5|MRI1.1|MRI1_1	zinc finger protein CONSTANS-LIKE 5	protein-coding
1249	1	22420803	22420983	+	0	NA	Intergenic	Intergenic	-3016	AT1G60900.1	842382	At.17780	NM_104771		AT1G60900	T7P1.5|T7P1_5	Splicing factor U2af large subunit B	protein-coding
6110	5	14552111	14552148	+	0	NA	Intergenic	ATREP3|RC|Helitron	-3009	AT5G36903.1	6240890				AT5G36903	-	pseudo	pseudo
94	1	973062	973211	+	0	NA	Intergenic	Intergenic	-3006	AT1G03840.1	839396	At.42516	NM_100263		MGP	F21M11.25|F21M11_25|Magpie	zinc finger protein MAGPIE	protein-coding
6364	5	20173287	20173480	+	0	NA	Intergenic	Intergenic	-3002	AT5G49680.2	835031	At.55458	NM_001085269		AT5G49680	-	SABRE-like protein	protein-coding
4212	3	22325504	22325670	+	0	NA	Intergenic	Intergenic	-3001	AT3G60390.1	825210	At.21112	NM_115903		HAT3	HOMEOBOX PROTEIN|homeobox-leucine zipper protein 3	homeobox-leucine zipper protein HAT3	protein-coding
2310	2	11353894	11354084	+	0	NA	Intergenic	Intergenic	-2996	AT2G26690.1	817210	At.383	NM_179753		AT2G26690	F18A8.6|F18A8_6	nitrate transporter 1.4	protein-coding
3474	3	5834750	5834946	+	0	NA	Intergenic	Intergenic	-2994	AT3G17110.1	3768803				AT3G17110	-	pseudo	pseudo
5188	4	16689616	16689778	+	0	NA	Intergenic	Intergenic	-2994	AT4G35060.1	829658	At.31450	NM_119672		AT4G35060	T12J5.12	heavy metal transport/detoxification domain-containing protein	protein-coding
3	1	16614	16797	+	0	NA	Intergenic	Intergenic	-2991	AT1G01030.1	839321	At.49492	NM_099985		NGA3	NGATHA3|T25K16.3|T25K16_3	B3 domain-containing transcription factor NGA3	protein-coding
4871	4	12373105	12373305	+	0	NA	Intergenic	Intergenic	-2989	AT4G23750.2	828475	At.26323	NM_118506		CRF2	F9D16.220|F9D16_220|TARGET OF MONOPTEROS 3|TMO3|cytokinin response factor 2	ethylene-responsive transcription factor CRF2	protein-coding
774	1	9348368	9348566	+	0	NA	Intergenic	Intergenic	-2987	AT1G26945.1	839585	At.44742	NM_179381		KDR	KIDARI	basic helix-loop-helix protein KIDARI	protein-coding
3530	3	6719919	6720089	+	0	NA	Intergenic	Intergenic	-2985	AT3G19390.1	821473	At.27473	NM_112826		AT3G19390	-	Granulin repeat cysteine protease family protein	protein-coding
4115	3	21056846	21057027	+	0	NA	Intergenic	Intergenic	-2979	AT3G56880.1	824855	At.23094	NM_115547		AT3G56880	-	VQ motif-containing protein	protein-coding
3416	3	5223102	5223280	+	0	NA	Intergenic	Intergenic	-2973	AT3G15470.1	820786	At.11977	NM_112415		AT3G15470	-	WD40 domain-containing protein	protein-coding
4179	3	21808099	21808273	+	0	NA	Intergenic	Intergenic	-2972	AT3G59010.1	825070	At.5019	NM_115763		PME61	pectin methylesterase 61	pectinesterase 35	protein-coding
5504	5	944095	944258	+	0	NA	Intergenic	Intergenic	-2970	AT5G03670.1	831763	At.33244	NM_120448		AT5G03670	F17C15.90|F17C15_90	hypothetical protein	protein-coding
5869	5	6186842	6187005	+	0	NA	Intergenic	Intergenic	-2969	AT5G18600.1	831978	At.43305	NM_121865		AT5G18600	T28N17.80|T28N17_80	monothiol glutaredoxin-S2	protein-coding
6813	5	26100441	26100629	+	0	NA	Intergenic	Intergenic	-2968	AT5G65305.1	3771560				AT5G65305	67923.TRNA-MET-1	tRNA	tRNA
1514	1	26243577	26243771	+	0	NA	Intergenic	Intergenic	-2966	AT1G69760.1	843312	At.46680	NM_105644		AT1G69760	T6C23.4|T6C23_4	hypothetical protein	protein-coding
5313	4	17730667	17730719	+	0	NA	Intergenic	Intergenic	-2963	AT4G37740.1	829930	At.2873	NM_119936		GRF2	AtGRF2|T28I19.20|T28I19_20|growth-regulating factor 2	growth-regulating factor 2	protein-coding
6268	5	18522034	18522196	+	0	NA	Intergenic	Intergenic	-2956	AT5G45660.1	2746194	At.44118	NM_203161		AT5G45660	-	hypothetical protein	protein-coding
5031	4	14622463	14622579	+	0	NA	Intergenic	Intergenic	-2948	AT4G29900.1	829112	At.31882	NM_119136		ACA10	ATACA10|AUTOINHIBITED CA(2+)-ATPASE|CIF1|COMPACT INFLORESCENCE 1|F27B13.140|F27B13_140|autoinhibited Ca(2+)-ATPase 10	calcium-transporting ATPase 10	protein-coding
2227	2	9871895	9872029	+	0	NA	Intergenic	Intergenic	-2945	AT2G23180.1	816850	At.12328	NM_127882		CYP96A1	T20D16.19|T20D16_19|cytochrome P450|family 96|polypeptide 1|subfamily A	cytochrome P450, family 96, subfamily A, polypeptide 1	protein-coding
994	1	15888371	15888484	+	0	NA	Intergenic	Intergenic	-2944	AT1G42430.2	840847	At.39108	NM_103431		AT1G42430	F7F22.5|F7F22_5	hypothetical protein	protein-coding
6501	5	22164315	22164513	+	0	NA	Intergenic	Intergenic	-2935	AT5G54569.1	6240592				AT5G54569	-	ncRNA	ncRNA
6832	5	26249216	26249408	+	0	NA	Intergenic	Intergenic	-2933	AT5G65660.1	836692	At.28896	NM_125964		AT5G65660	K21L13.18|K21L13_18	hydroxyproline-rich glycoprotein family protein	protein-coding
5263	4	17396189	17396351	+	0	NA	Intergenic	Intergenic	-2931	AT4G36910.1	829844	At.31287	NM_119855		LEJ2	AP22.61|AP22_61|CDCP2|CYSTATHIONE [BETA]-SYNTHASE DOMAIN-CONTAINING PROTEIN 2|LOSS OF THE TIMING OF ET AND JA BIOSYNTHESIS 2	CBS domain-containing protein CBSX1	protein-coding
4087	3	20686912	20687048	+	0	NA	Intergenic	Intergenic	-2927	AT3G55730.1	824739	At.1704	NM_115431		MYB109	AtMYB109|myb domain protein 109	myb domain protein 109	protein-coding
3372	3	4723792	4723965	+	0	NA	Intergenic	Intergenic	-2927	AT3G14205.1	820638	At.26576	NM_112277		AT3G14205	-	phosphoinositide phosphatase family protein	protein-coding
2873	2	18474125	18474269	+	0	NA	Intergenic	Intergenic	-2920	AT2G44798.2	5007962				AT2G44798	-	ncRNA	ncRNA
744	1	8985861	8986058	+	0	NA	Intergenic	Intergenic	-2918	AT1G25560.1	839143	At.17318	NM_102367		TEM1	EDF1|ETHYLENE RESPONSE DNA BINDING FACTOR 1|F2J7.3|F2J7_3|TEMPRANILLO 1	AP2/ERF and B3 domain-containing transcription repressor TEM1	protein-coding
5011	4	14365920	14366101	+	0	NA	Intergenic	Intergenic	-2909	AT4G29140.1	829035	At.27582	NM_119058		AT4G29140	F19B15.170|F19B15_170	putative MATE transport protein ADS1	protein-coding
2832	2	17906189	17906380	+	0	NA	Intergenic	Intergenic	-2901	AT2G43060.1	818908	At.27337	NM_129867		IBH1	ILI1 binding bHLH 1|MFL8.8	ILI1 binding bHLH 1 protein	protein-coding
2362	2	12111415	12111456	+	0	NA	Intergenic	Intergenic	-2896	AT2G28350.1	817382	At.13730	NM_128394		ARF10	T1B3.13|T1B3_13|auxin response factor 10	auxin response factor 10	protein-coding
3086	3	1057964	1058145	+	0	NA	Intergenic	Intergenic	-2891	AT3G04060.1	819561	At.27906	NM_111277		NAC046	NAC domain containing protein 46|T11I18.17|T11I18_17|anac046	NAC domain containing protein 46	protein-coding
2678	2	16435428	16435455	+	0	NA	Intergenic	Intergenic	-2884	AT2G39350.1	818520	At.48570	NM_129492		AT2G39350	T16B24.1|T16B24_1	ABC transporter G family member 1	protein-coding
4794	4	11595020	11595218	+	0	NA	Intergenic	Intergenic	-2881	AT4G21850.2	828273	At.22710	NM_118305		MSRB9	ATMSRB9|T8O5.60|T8O5_60|methionine sulfoxide reductase B9	methionine sulfoxide reductase B9	protein-coding
4213	3	22326152	22326277	+	0	NA	Intergenic	Intergenic	-2878	AT3G60400.1	825211	At.34455	NM_115904		AT3G60400	-	mitochondrial transcription termination factor family protein	protein-coding
5380	4	18321701	18321890	+	0	NA	Intergenic	Intergenic	-2866	AT4G39400.1	830095	At.27898	NM_120100		BRI1	ATBRI1|BIN1|BR INSENSITIVE 1|BRASSINOSTEROID INSENSITIVE 1|CABBAGE 2|CBB2|DWARF 2|DWF2|F23K16.30|F23K16_30	protein brassinosteroid insensitive 1	protein-coding
2760	2	17248988	17249167	+	0	NA	Intergenic	Intergenic	-2864	AT2G41380.1	818736	At.43779	NM_129701		AT2G41380	F13H10.7|F13H10_7	S-adenosyl-L-methionine-dependent methyltransferase-like protein	protein-coding
1528	1	26306691	26306841	+	0	NA	Intergenic	Intergenic	-2862	AT1G69860.1	843322	At.52455	NM_105654		AT1G69860	T17F3.11|T17F3_11	putative peptide/nitrate transporter	protein-coding
1786	1	28676700	28676891	+	0	NA	Intergenic	Intergenic	-2861	AT1G76420.1	843975	At.52530	NM_106292		CUC3	ANAC031|Arabidopsis NAC domain containing protein 31|CUP SHAPED COTYLEDON3|F15M4.8|NAC368	protein CUP-SHAPED COTYLEDON 3	protein-coding
4016	3	19598593	19598754	+	0	NA	Intergenic	Intergenic	-2851	AT3G52870.1	824453	At.35252	NM_115147		AT3G52870	-	IQ calmodulin-binding motif family protein	protein-coding
1478	1	25952024	25952176	+	0	NA	Intergenic	Intergenic	-2838	AT1G69030.1	843235	At.27528	NM_105574		AT1G69030	T6L1.21|T6L1_21	BSD domain-containing protein	protein-coding
5739	5	4201723	4201917	+	0	NA	Intergenic	Intergenic	-2837	AT5G13181.1	6241502	At.73432	NM_001125745		AT5G13181	-	hypothetical protein	protein-coding
5291	4	17576677	17576861	+	0	NA	Intergenic	Intergenic	-2831	AT4G37380.1	829892	At.65465	NM_119901		AT4G37380	F6G17.30|F6G17_30	pentatricopeptide repeat-containing protein	protein-coding
6254	5	18215676	18215846	+	0	NA	Intergenic	Intergenic	-2825	AT5G45100.2	834543	At.26652	NM_123878		AT5G45100	K17O22.9|K17O22_9	BOI-related protein 1	protein-coding
2242	2	10069325	10069509	+	0	NA	Intergenic	Intergenic	-2816	AT2G23690.1	816900	At.43913	NM_127932		AT2G23690	F27L4.13|F27L4_13	hypothetical protein	protein-coding
2518	2	14347475	14347670	+	0	NA	Intergenic	Intergenic	-2814	AT2G33890.1	3767833				AT2G33890	170.TRNA-PRO-1|6067.TRNA-PRO-1	tRNA	tRNA
512	1	6512528	6512703	+	0	NA	Intergenic	Intergenic	-2814	AT1G18870.1	838468	At.43418	NM_101744		ICS2	ARABIDOPSIS ISOCHORISMATE SYNTHASE 2|ATICS2|F6A14.3|F6A14_3|isochorismate synthase 2	Isochorismate synthase 2	protein-coding
2384	2	12375428	12375625	+	0	NA	Intergenic	Intergenic	-2811	AT2G28840.1	817433	At.21021	NM_128443		XBAT31	F8N16.13|F8N16_13|XB3 ortholog 1 in Arabidopsis thaliana	putative E3 ubiquitin-protein ligase XBAT31	protein-coding
5793	5	4918666	4918739	+	0	NA	Intergenic	Intergenic	-2810	AT5G15150.1	831367	At.49022	NM_121519		HB-3	ATHB-3|ATHB3|F8M21.40|F8M21_40|HAT7|HOMEOBOX FROM ARABIDOPSIS THALIANA 7|HOMEOBOX PROTEIN|homeobox 3	homeobox-leucine zipper protein HAT7	protein-coding
6920	5	26901802	26901996	+	0	NA	Intergenic	Intergenic	-2802	AT5G67411.1	3771574	At.65711	NM_001037090		AT5G67411	-	putative GRAS family transcription factor	protein-coding
6300	5	19103441	19103639	+	0	NA	Intergenic	Intergenic	-2800	AT5G47050.1	834751	At.24049	NM_124076		AT5G47050	MQD22.19|MQD22_19	S-ribonuclease binding protein	protein-coding
5733	5	4193677	4193869	+	0	NA	Intergenic	Intergenic	-2799	AT5G13180.1	831157	At.10079	NM_121321		NAC083	ANAC083|NAC domain containing protein 83|T19L5.140|T19L5_140|VND-interacting 2|VNI2	NAC domain containing protein 83	protein-coding
5247	4	17319084	17319254	+	0	NA	Intergenic	Intergenic	-2795	AT4G36740.1	829827	At.50404	NM_119838		HB40	AP22.8|AP22_8|ATHB40|HB-5|homeobox protein 40	homeobox protein 40	protein-coding
3504	3	6380641	6380799	+	0	NA	Intergenic	Intergenic	-2788	AT3G18550.2	821386	At.50196	NM_112741		BRC1	ATTCP18|BRANCHED 1|TCP18	transcription factor TCP18	protein-coding
5451	5	328899	329088	+	0	NA	Intergenic	Intergenic	-2780	AT5G01849.1	6241287	At.73450	NM_001125680		AT5G01849	-	hypothetical protein	protein-coding
6554	5	23000818	23000989	+	0	NA	Intergenic	Intergenic	-2777	AT5G56865.1	6241465	At.73340	NM_001125975		AT5G56865	-	hypothetical protein	protein-coding
1045	1	18213014	18213187	+	0	NA	Intergenic	Intergenic	-2772	AT1G49240.1	841347	At.24689	NM_103814		ACT8	F27J15.1|F27J15_1|actin 8	actin 8	protein-coding
1324	1	23897176	23897364	+	0	NA	Intergenic	Intergenic	-2765	AT1G64385.1	842746	At.20348	NM_148627		AT1G64385	-	hypothetical protein	protein-coding
4516	4	6876202	6876394	+	0	NA	Intergenic	Intergenic	-2757	AT4G11300.1	826732	At.33576	NM_117201		AT4G11300	F8L21.90|F8L21_90	hypothetical protein	protein-coding
3810	3	16257365	16257534	+	0	NA	Intergenic	Intergenic	-2756	AT3G44713.1	823599	At.53730	NM_148838		AT3G44713	-	hypothetical protein	protein-coding
5258	4	17384440	17384627	+	0	NA	Intergenic	Intergenic	-2753	AT4G36890.1	829842	At.31289	NM_119853		IRX14	AP22.51|AP22_51|irregular xylem 14	probable beta-1,4-xylosyltransferase IRX14	protein-coding
792	1	9617565	9617750	+	0	NA	Intergenic	Intergenic	-2751	AT1G27640.1	839656	At.20200	NM_102529		AT1G27640	T22C5.9	putative leaf development protein	protein-coding
3167	3	1952438	1952635	+	0	NA	Intergenic	Intergenic	-2747	AT3G06410.1	819815	At.27771	NM_111516		AT3G06410	F24P17.12|F24P17_12	zinc finger CCCH domain-containing protein 34	protein-coding
1752	1	28386417	28386613	+	0	NA	Intergenic	Intergenic	-2747	AT1G75590.1	843894	At.34755	NM_106211		AT1G75590	F10A5.20|F10A5_20	SAUR-like auxin-responsive protein	protein-coding
4524	4	6995215	6995389	+	0	NA	Intergenic	Intergenic	-2747	AT4G11540.1	826758	At.65358	NM_117223		AT4G11540	F25E4.160|F25E4_160	cysteine/histidine-rich C1 domain-containing protein	protein-coding
6833	5	26250830	26251001	+	0	NA	Intergenic	Intergenic	-2743	AT5G65670.1	836693	At.20107	NM_125965		IAA9	INDOLE-3-ACETIC ACID 9|MPA24.1|MPA24_1|indole-3-acetic acid inducible 9	auxin-responsive protein IAA9	protein-coding
1007	1	17062429	17062596	+	0	NA	Intergenic	Intergenic	-2740	AT1G45130.1	841080	At.24850	NM_103587		BGAL5	F27F5.20|F27F5_20|beta-galactosidase 5	beta-galactosidase 5	protein-coding
3729	3	9738201	9738359	+	0	NA	Intergenic	Intergenic	-2739	AT3G26530.1	822261				AT3G26530	-	pseudo	pseudo
1949	2	300745	300913	+	0	NA	Intergenic	Intergenic	-2728	AT2G01670.1	814696	At.25360	NM_126228		NUDT17	T8O11.16|T8O11_16|atnudt17|nudix hydrolase homolog 17	nudix hydrolase 17	protein-coding
4849	4	12261052	12261225	+	0	NA	Intergenic	Intergenic	-2727	AT4G23496.1	828449	At.32424	NM_118480		SP1L5	SPIRAL1-like5	protein SPIRAL1-like5	protein-coding
4128	3	21144750	21144914	+	0	NA	Intergenic	Intergenic	-2726	AT3G57130.2	824880	At.53964	NM_115572		BOP1	BLADE ON PETIOLE 1	protein BLADE ON PETIOLE 1	protein-coding
683	1	8305304	8305449	+	0	NA	Intergenic	Intergenic	-2725	AT1G23380.1	838946	At.26286	NM_102187		KNAT6	F26F24.32|F26F24_32|KNAT6L|KNAT6S|KNOTTED1-like homeobox gene 6	homeobox protein knotted-1-like 6	protein-coding
5264	4	17397821	17397954	+	0	NA	Intergenic	Intergenic	-2723	AT4G36920.2	829845	At.4638	NM_119856		AP2	AP22.49|AP22_49|APETALA 2|FL1|FLO2|FLORAL HOMEOTIC PROTEIN APETALA 2|FLORAL MUTANT 2|FLOWER 1	Floral homeotic protein APETALA 2	protein-coding
1287	1	23166338	23166491	+	0	NA	Intergenic	Intergenic	-2722	AT1G62570.1	842554	At.22246	NM_104935		FMO GS-OX4	T3P18.13|T3P18_13|flavin-monooxygenase glucosinolate S-oxygenase 4	flavin-containing monooxygenase FMO GS-OX4	protein-coding
5691	5	3661558	3661746	+	0	NA	Intergenic	Intergenic	-2721	AT5G11460.1	831017	At.50451	NM_121184		AT5G11460	F15N18.50|F15N18_50	hypothetical protein	protein-coding
1242	1	22185756	22185952	+	0	NA	Intergenic	Intergenic	-2711	AT1G60150.1	3767577				AT1G60150	T13D8.37	pseudo	pseudo
5336	4	17817705	17817905	+	0	NA	Intergenic	Intergenic	-2710	AT4G37890.2	829945	At.31220	NM_119950		EDA40	F20D10.10|F20D10_10|embryo sac development arrest 40	protein EMBRYO SAC DEVELOPMENT ARREST 40	protein-coding
3087	3	1065712	1065912	+	0	NA	Intergenic	Intergenic	-2709	AT3G04070.2	819562	At.42943	NM_111278		NAC047	NAC domain containing protein 47|T11I18.18|T11I18_18|anac047	NAC domain containing protein 47	protein-coding
3793	3	12453878	12454035	+	0	NA	Intergenic	Intergenic	-2708	AT3G30775.1	822833	At.24174	NM_113981		ERD5	ARABIDOPSIS THALIANA PROLINE OXIDASE|AT-POX|ATPDH|ATPOX|EARLY RESPONSIVE TO DEHYDRATION 5|PRO1|PRODH|PROLINE DEHYDROGENASE|PROLINE OXIDASE	proline dehydrogenase 1	protein-coding
4720	4	10293536	10293579	+	0	NA	Intergenic	Intergenic	-2707	AT4G18700.1	827604	At.2691	NM_117986		CIPK12	ATWL4|CBL-interacting protein kinase 12|F28A21.110|F28A21_110|SNF1-RELATED PROTEIN KINASE 3.9|SnRK3.9|WL4|WPL4-LIKE 4	CBL-interacting serine/threonine-protein kinase 12	protein-coding
3518	3	6533934	6534089	+	0	NA	Intergenic	Intergenic	-2704	AT3G18950.1	821427	At.38474	NM_112781		AT3G18950	-	WD40 domain-containing protein	protein-coding
3483	3	5995558	5995667	+	0	NA	Intergenic	Intergenic	-2700	AT3G17510.1	821016	At.21023	NM_112631		CIPK1	CBL-interacting protein kinase 1|SNF1-RELATED PROTEIN KINASE 3.16|SnRK3.16	CBL-interacting serine/threonine-protein kinase 1	protein-coding
3676	3	8925667	8925867	+	0	NA	Intergenic	Intergenic	-2694	AT3G24503.1	822042	At.22894	NM_113359		ALDH2C4	ALDH1A|REDUCED EPIDERMAL FLUORESCENCE1|REF1|aldehyde dehydrogenase 1A|aldehyde dehydrogenase 2C4	aldehyde dehydrogenase 2C4	protein-coding
4275	3	22910555	22910732	+	0	NA	Intergenic	Intergenic	-2685	AT3G61880.1	825361	At.23925	NM_116053		CYP78A9	cytochrome p450 78a9	cytochrome p450 78a9	protein-coding
838	1	10233613	10233753	+	0	NA	Intergenic	Intergenic	-2684	AT1G29280.1	839802	At.28324	NM_102668		WRKY65	ATWRKY65|F28N24.4|F28N24_4|WRKY DNA-BINDING PROTEIN 65|WRKY DNA-binding protein 65	putative WRKY transcription factor 65	protein-coding
5320	4	17749372	17749430	+	0	NA	Intergenic	Intergenic	-2683	AT4G37770.1	829933	At.2875	NM_119939		ACS8	1-amino-cyclopropane-1-carboxylate synthase 8|T28I19.50|T28I19_50	1-aminocyclopropane-1-carboxylate synthase 8	protein-coding
3940	3	18797614	18797782	+	0	NA	Intergenic	Intergenic	-2682	AT3G50630.1	824226	At.838	NM_114923		KRP2	ICK2|KIP-RELATED PROTEIN 2|KIP-related protein 2	cyclin-dependent kinase inhibitor 2	protein-coding
4312	3	23278952	23279143	+	0	NA	Intergenic	Intergenic	-2672	AT3G62980.1	825473	At.25594	NM_116163		TIR1	TRANSPORT INHIBITOR RESPONSE 1	protein TRANSPORT INHIBITOR RESPONSE 1	protein-coding
5612	5	2612846	2612992	+	0	NA	Intergenic	Intergenic	-2669	AT5G08130.5	830708	At.20960	NM_120895		BIM1	T22D6.70|T22D6_70	transcription factor BIM1	protein-coding
2771	2	17443942	17444097	+	0	NA	Intergenic	Intergenic	-2669	AT2G41810.1	818780	At.42786	NM_129745		AT2G41810	T11A7.9|T11A7_9	hypothetical protein	protein-coding
5528	5	1269991	1270177	+	0	NA	Intergenic	Intergenic	-2668	AT5G04470.1	830326	At.25536	NM_120529		SIM	SIAMESE|T19N18.8	cyclin-dependent protein kinase inhibitor	protein-coding
5285	4	17537733	17537915	+	0	NA	Intergenic	Intergenic	-2666	AT4G37260.1	829880	At.56989	NM_119889		MYB73	AP22.97|AP22_97|ATMYB73|myb domain protein 73	myb domain protein 73	protein-coding
2751	2	17218889	17219025	+	0	NA	Intergenic	Intergenic	-2665	AT2G41300.1	818729	At.42851	NM_129694		SSL1	F13H10.15|F13H10_15|strictosidine synthase-like 1	strictosidine synthase-like 1	protein-coding
2355	2	12021417	12021567	+	0	NA	Intergenic	Intergenic	-2657	AT2G28200.1	817366	At.39	NM_128380		AT2G28200	T3B23.13|T3B23_13	zinc finger protein ZAT5	protein-coding
2203	2	9702453	9702652	+	0	NA	Intergenic	Intergenic	-2655	AT2G22795.1	816810	At.45724	NM_179701		AT2G22795	-	hypothetical protein	protein-coding
5582	5	1997462	1997661	+	0	NA	Intergenic	Intergenic	-2649	AT5G06530.1	830541	At.20832	NM_120736		AT5G06530	F15M7.6|F15M7_6	ABC transporter G family member 22	protein-coding
1746	1	28363288	28363471	+	0	NA	Intergenic	ATREP4|RC|Helitron	-2648	AT1G75540.1	843890	At.34761	NM_106207		STH2	F10A5.24|F10A5_24|salt tolerance homolog2	B-box zinc finger transcription factor BBX21	protein-coding
1003	1	16937090	16937223	+	0	NA	Intergenic	Intergenic	-2641	AT1G44835.1	841048	At.43585	NM_103565		AT1G44835	T12C22.11|T12C22_11	YbaK/aminoacyl-tRNA synthetase-associated domain-containing protein	protein-coding
2785	2	17504782	17504961	+	0	NA	Intergenic	Intergenic	-2638	AT2G41940.1	818794	At.20402	NM_129758		ZFP8	T6D20.16|T6D20_16|ZINC FINGER PROTEIN8|zinc finger protein 8	zinc finger protein 8	protein-coding
1060	1	18432858	18433024	+	0	NA	Intergenic	Intergenic	-2622	AT1G49780.1	841401	At.38168	NM_103865		PUB26	F14J22.1|F14J22_1|plant U-box 26	U-box domain-containing protein 26	protein-coding
5228	4	17087230	17087425	+	0	NA	Intergenic	Intergenic	-2622	AT4G36110.1	829768	At.2229	NM_119778		AT4G36110	-	SAUR-like auxin-responsive protein	protein-coding
6034	5	8710293	8710445	+	0	NA	Intergenic	Intergenic	-2621	AT5G25190.1	832590	At.26169	NM_122428		AT5G25190	F21J6.103|F21J6_103	ethylene-responsive transcription factor ERF003	protein-coding
2864	2	18371608	18371740	+	0	NA	Intergenic	Intergenic	-2618	AT2G44500.2	819057	At.21825	NM_130013		AT2G44500	F4I1.31	O-fucosyltransferase family protein	protein-coding
3755	3	10440135	10440273	+	0	NA	Intergenic	Intergenic	-2610	AT3G28050.1	822429	At.24256	NM_113723		AT3G28050	-	nodulin MtN21-like transporter UMAMIT41	protein-coding
3922	3	18561633	18561798	+	0	NA	Intergenic	Intergenic	-2609	AT3G50060.1	824168	At.22600	NM_114866		MYB77	myb domain protein 77	myb domain protein 77	protein-coding
6785	5	25792538	25792721	+	0	NA	Intergenic	Intergenic	-2604	AT5G64530.1	836574	At.28954	NM_125849		XND1	ANAC104|Arabidopsis NAC domain containing protein 104|MUB3.5|MUB3_5|xylem NAC domain 1	xylem NAC domain 1	protein-coding
150	1	1840878	1841052	+	0	NA	Intergenic	BRODYAGA2|DNA|MuDR	-2603	AT1G06080.1	837117	At.342	NM_100489		ADS1	DELTA 9 DESATURASE|T21E18.13|T21E18_13|delta 9 desaturase 1	delta-9 acyl-lipid desaturase 1	protein-coding
2887	2	18580179	18580362	+	0	NA	Intergenic	Intergenic	-2602	AT2G45050.1	819112	At.216	NM_130069		GATA2	GATA transcription factor 2|T14P1.14	GATA transcription factor 2	protein-coding
1018	1	17288205	17288335	+	0	NA	Intergenic	Intergenic	-2600	AT1G47128.1	841122	At.43549	NM_103612		RD21	F2G19.31|F2G19_31|RD21A|RESPONSIVE TO DEHYDRATION 21A|responsive to dehydration 21	cysteine proteinase RD21a	protein-coding
149	1	1840149	1840340	+	0	NA	Intergenic	Intergenic	-2596	AT1G06070.1	837116	At.42357	NM_100488		AT1G06070	T21E18.12|T21E18_12	putative basic-leucine zipper transcription factor bZIP69	protein-coding
2807	2	17722580	17722773	+	0	NA	Intergenic	Intergenic	-2596	AT2G42570.1	818857	At.14364	NM_129818		TBL39	F14N22.16|F14N22_16|TRICHOME BIREFRINGENCE-LIKE 39	protein trichome birefringence-like 39	protein-coding
498	1	6393235	6393318	+	0	NA	Intergenic	Intergenic	-2588	AT1G18580.1	838439	At.26538	NM_101716		GAUT11	F25I16.8|F25I16_8|galacturonosyltransferase 11	putative galacturonosyltransferase	protein-coding
1295	1	23395384	23395494	+	0	NA	Intergenic	Intergenic	-2588	AT1G63090.1	842612	At.17747	NM_104987		PP2-A11	AtPP2-A11|F16M19.16|F16M19_16|phloem protein 2-A11	phloem protein 2-A11	protein-coding
3047	3	429555	429738	+	0	NA	Intergenic	Intergenic	-2585	AT3G02250.1	821223	At.18536	NM_111092		AT3G02250	F14P3.10|F14P3_10	O-fucosyltransferase-like protein	protein-coding
1841	1	29371216	29371400	+	0	NA	Intergenic	Intergenic	-2581	AT1G78090.1	844144	At.20226	NM_106458		TPPB	ATTPPB|T11I11.2|T11I11_2|TREHALOSE-6-PHOSPHATE PHOSPHATASE|trehalose-6-phosphate phosphatase	trehalose-6-phosphate phosphatase	protein-coding
2543	2	14646771	14646936	+	0	NA	Intergenic	Intergenic	-2580	AT2G34710.1	818036	At.37771	NM_129025		PHB	ARABIDOPSIS THALIANA HOMEOBOX PROTEIN 14|ATHB-14|ATHB14|PHABULOSA|PHABULOSA 1D|PHB-1D|T29F13.8|T29F13_8	homeobox-leucine zipper protein ATHB-14	protein-coding
880	1	10851892	10852048	+	0	NA	Intergenic	Intergenic	-2579	AT1G30620.1	839942	At.20201	NM_102799		MUR4	HIGH SUGAR RESPONSE8|HSR8|MURUS 4|T5I8.7|T5I8_7|UDP-D-XYLOSE 4-EPIMERASE 1|UXE1	UDP-arabinose 4-epimerase 1	protein-coding
3232	3	3047413	3047572	+	0	NA	Intergenic	Intergenic	-2573	AT3G09920.3	820151	At.40019	NM_111827		PIP5K9	phosphatidyl inositol monophosphate 5 kinase	phosphatidyl inositol monophosphate 5 kinase	protein-coding
5971	5	7500031	7500172	+	0	NA	Intergenic	Intergenic	-2573	AT5G22580.1	832321	At.47494	NM_122164		AT5G22580	MQJ16.12|MQJ16_12	stress responsive A/B Barrel domain-containing protein	protein-coding
6382	5	20547239	20547410	+	0	NA	Intergenic	Intergenic	-2571	AT5G50450.1	835113	At.24402	NM_124427		AT5G50450	MXI22.17|MXI22_17	MYND-type zinc finger protein	protein-coding
2839	2	18005052	18005210	+	0	NA	Intergenic	Intergenic	-2566	AT2G43340.1	818935	At.28611	NM_180063		AT2G43340	T1O24.8	hypothetical protein	protein-coding
4993	4	14097244	14097434	+	0	NA	Intergenic	Intergenic	-2563	AT4G28530.2	828971	At.32009	NM_118995		NAC074	F20O9.220|F20O9_220|NAC domain containing protein 74|anac074	NAC domain containing protein 74	protein-coding
1011	1	17235396	17235590	+	0	NA	Intergenic	Intergenic	-2558	AT1G46408.1	841112	At.65984	NM_103604		AGL97	AGAMOUS-like 97|F2G19.10|F2G19_10	agamous-like MADS-box protein AGL97	protein-coding
3116	3	1485999	1486085	+	0	NA	Intergenic	Intergenic	-2553	AT3G05220.1	819686	At.40712	NM_111395		AT3G05220	T12H1.19|T12H1_19	heavy-metal-associated domain-containing protein	protein-coding
1588	1	26776195	26776360	+	0	NA	Intergenic	Intergenic	-2552	AT1G71002.1	6240652				MIR858A	microRNA858A	ncRNA	ncRNA
334	1	4539520	4539715	+	0	NA	Intergenic	Intergenic	-2551	AT1G13260.1	837886	At.20558	NM_101197		RAV1	EDF4|ETHYLENE RESPONSE DNA BINDING FACTOR 4|T6J4.2|T6J4_2|related to ABI3/VP1 1	AP2/ERF and B3 domain-containing transcription factor RAV1	protein-coding
4853	4	12289199	12289346	+	0	NA	Intergenic	Intergenic	-2548	AT4G23550.1	828455	At.27348	NM_118486		WRKY29	ATWRKY29|F9D16.20|F9D16_20	putative WRKY transcription factor 29	protein-coding
2882	2	18534614	18534809	+	0	NA	Intergenic	Intergenic	-2546	AT2G44940.1	819103	At.14592	NM_130059		AT2G44940	T13E15.25	ethylene-responsive transcription factor ERF034	protein-coding
1837	1	29361664	29361747	+	0	NA	Intergenic	Intergenic	-2544	AT1G78080.1	844143	At.25524	NM_106457		RAP2.4	F28K19.29|F28K19_29|related to AP2 4	ethylene-responsive transcription factor RAP2-4	protein-coding
2231	2	9908364	9908558	+	0	NA	Intergenic	Intergenic	-2541	AT2G23290.1	816861	At.28681	NM_127893		MYB70	AtMYB70|T20D16.8|T20D16_8|myb domain protein 70	myb domain protein 70	protein-coding
1806	1	28870420	28870595	+	0	NA	Intergenic	Intergenic	-2538	AT1G76878.1	6240557				AT1G76878	-	ncRNA	ncRNA
5397	4	18453743	18453918	+	0	NA	Intergenic	Intergenic	-2537	AT4G39770.1	830135	At.31063	NM_120140		AT4G39770	T19P19.160|T19P19_160	probable trehalose-phosphate phosphatase H	protein-coding
4790	4	11522203	11522400	+	0	NA	Intergenic	Intergenic	-2536	AT4G21680.1	828255	At.2700	NM_118288		NRT1.8	F17L22.140|F17L22_140|NITRATE TRANSPORTER 1.8	nitrate transporter 1.8	protein-coding
2116	2	8106422	8106599	+	0	NA	Intergenic	Intergenic	-2533	AT2G18700.1	816385	At.25317	NM_127426		TPS11	ATTPS11|ATTPSB|MSF3.8|MSF3_8|TREHALOSE-6-PHOSPHATE SYNTHASE 11|trehalose phosphatase/synthase 11	putative alpha,alpha-trehalose-phosphate synthase [UDP-forming] 11	protein-coding
2743	2	17147759	17147950	+	0	NA	Intergenic	Intergenic	-2533	AT2G41140.1	818713	At.11329	NM_129679		CRK1	ATCBK3|ATCRK1|CDPK-related kinase 1|T3K9.9|T3K9_9	CDPK-related kinase 1	protein-coding
3956	3	18859332	18859496	+	0	NA	Intergenic	Intergenic	-2530	AT3G50740.1	824238	At.20099	NM_114934		UGT72E1	F18B3.20|UDP-glucosyl transferase 72E1	UDP-glucosyl transferase 72E1	protein-coding
5505	5	955126	955315	+	0	NA	Intergenic	Intergenic	-2524	AT5G03680.1	831757	At.50425	NM_120449		PTL	F17C15.100|F17C15_100|PETAL LOSS	trihelix transcription factor PTL	protein-coding
6902	5	26812195	26812225	+	0	NA	Intergenic	Intergenic	-2521	AT5G67190.1	836854	At.50633	NM_126119		DEAR2	DREB and EAR motif protein 2|K21H1.15|K21H1_15	ethylene-responsive transcription factor ERF010	protein-coding
5824	5	5416299	5416447	+	0	NA	Intergenic	Intergenic	-2518	AT5G16567.1	6240540	At.73426	NM_001125764		AT5G16567	-	hypothetical protein	protein-coding
6532	5	22692270	22692454	+	0	NA	Intergenic	Intergenic	-2516	AT5G56040.2	835702	At.27847	NM_124986		AT5G56040	MDA7.8|MDA7_8	leucine-rich receptor-like protein kinase	protein-coding
1572	1	26678410	26678597	+	0	NA	Intergenic	Intergenic	-2513	AT1G70740.2	843411	At.35272	NM_105742		AT1G70740	F5A18.8|F5A18_8	protein kinase family protein	protein-coding
6451	5	21697591	21697788	+	0	NA	Intergenic	Intergenic	-2513	AT5G53460.2	835427	At.8951	NM_124725		GLT1	MYN8.7|MYN8_7|NADH-GOGAT|NADH-dependent glutamate synthase 1	glutamate synthase 1 [NADH]	protein-coding
5030	4	14621990	14622175	+	0	NA	Intergenic	Intergenic	-2509	AT4G29900.1	829112	At.31882	NM_119136		ACA10	ATACA10|AUTOINHIBITED CA(2+)-ATPASE|CIF1|COMPACT INFLORESCENCE 1|F27B13.140|F27B13_140|autoinhibited Ca(2+)-ATPase 10	calcium-transporting ATPase 10	protein-coding
6447	5	21665357	21665512	+	0	NA	Intergenic	Intergenic	-2505	AT5G53410.1	835422	At.55523	NM_124720		AT5G53410	MYN8.2|MYN8_2	hypothetical protein	protein-coding
6742	5	25240674	25240830	+	0	NA	Intergenic	Intergenic	-2499	AT5G62890.4	836409	At.8485	NM_125683		AT5G62890	MQB2.190|MQB2_190	Xanthine/uracil permease family protein	protein-coding
860	1	10622434	10622629	+	0	NA	Intergenic	Intergenic	-2498	AT1G30200.2	839900	At.20393	NM_102759		AT1G30200	F12P21.1|F12P21_1	F-box protein	protein-coding
1286	1	23141828	23142003	+	0	NA	Intergenic	VANDAL17|DNA|MuDR	-2497	AT1G62520.1	842549	At.36251	NM_104931		AT1G62520	T3P18.8|T3P18_8	hypothetical protein	protein-coding
915	1	11598413	11598540	+	0	NA	Intergenic	Intergenic	-2494	AT1G32190.1	840111	At.16840	NM_102952		AT1G32190	F3C3.3|F3C3_3	alpha/beta-hydrolase-like protein	protein-coding
2287	2	10998037	10998191	+	0	NA	Intergenic	Intergenic	-2485	AT2G25790.1	817121	At.27474	NM_128139		AT2G25790	F17H15.18|F17H15_18	leucine-rich receptor-like protein kinase family protein	protein-coding
1842	1	29385222	29385414	+	0	NA	Intergenic	Intergenic	-2477	AT1G78100.1	844146	At.22971	NM_106460		AT1G78100	T11I11.4|T11I11_4	F-box protein	protein-coding
5262	4	17395721	17395907	+	0	NA	Intergenic	Intergenic	-2475	AT4G36910.1	829844	At.31287	NM_119855		LEJ2	AP22.61|AP22_61|CDCP2|CYSTATHIONE [BETA]-SYNTHASE DOMAIN-CONTAINING PROTEIN 2|LOSS OF THE TIMING OF ET AND JA BIOSYNTHESIS 2	CBS domain-containing protein CBSX1	protein-coding
6557	5	23018038	23018237	+	0	NA	Intergenic	Intergenic	-2466	AT5G56890.1	835791	At.20341	NM_148141		AT5G56890	-	protein kinase family protein	protein-coding
1804	1	28862953	28863115	+	0	NA	Intergenic	Intergenic	-2466	AT1G76880.1	844023	At.43159	NM_106339		AT1G76880	F7O12.5|F7O12_5	Duplicated homeodomain-like superfamily protein	protein-coding
655	1	7991660	7991704	+	0	NA	Intergenic	Intergenic	-2465	AT1G22600.1	838866	At.51726	NM_102107		AT1G22600	F12K8.5|F12K8_5	Late embryogenesis abundant protein (LEA) family protein	protein-coding
4178	3	21762316	21762487	+	0	NA	Intergenic	Intergenic	-2459	AT3G58850.1	825054		NM_115747		PAR2	HLH2|PHY RAPIDLY REGULATED 2	protein PHY RAPIDLY REGULATED 2	protein-coding
1525	1	26302880	26302981	+	0	NA	Intergenic	Intergenic	-2458	AT1G69850.1	843321	At.21144	NM_105653		NRT1:2	ATNRT1:2|NTL1|T17F3.12|T17F3_12|nitrate transporter 1:2	nitrate transporter 1:2	protein-coding
4433	4	1303954	1304140	+	0	NA	Intergenic	Intergenic	-2456	AT4G02940.1	828132	At.20270	NM_116528		AT4G02940	T4I9.18|T4I9_18	oxidoreductase, 2OG-Fe(II) oxygenase family protein	protein-coding
3610	3	8105494	8105643	+	0	NA	Intergenic	Intergenic	-2453	AT3G22886.1	3768900				MIR167A	microRNA167A	ncRNA	ncRNA
4688	4	9899075	9899166	+	0	NA	Intergenic	Intergenic	-2452	AT4G17800.1	827502	At.20660	NM_117890		AT4G17800	DL4935C|FCAALL.129	putative AT-hook DNA-binding family protein	protein-coding
6663	5	24351297	24351454	+	0	NA	Intergenic	Intergenic	-2449	AT5G60580.3	836179	At.24411	NM_125451		AT5G60580	MUF9.21|MUF9_21	RING/U-box domain-containing protein	protein-coding
4852	4	12288772	12288967	+	0	NA	Intergenic	Intergenic	-2449	AT4G23540.1	828454	At.47961	NM_118485		AT4G23540	F16G20.240|F16G20_240	ARM repeat superfamily protein	protein-coding
2631	2	15785802	15785952	+	0	NA	Intergenic	Intergenic	-2444	AT2G37630.1	818340	At.11577	NM_129319		AS1	ARABIDOPSIS PHANTASTICA-LIKE 1|ASYMMETRIC LEAVES 1|ATMYB91|ATPHAN|F13M22.13|F13M22_13|MYB DOMAIN PROTEIN 91|MYB91	transcription factor AS1	protein-coding
5193	4	16706058	16706162	+	0	NA	Intergenic	Intergenic	-2442	AT4G35100.2	829662	At.20518	NM_119676		PIP3	PIP2;7|PIP3A|PLASMA MEMBRANE INTRINSIC PROTEIN 2;7|PLASMA MEMBRANE INTRINSIC PROTEIN 3|PLASMA MEMBRANE INTRINSIC PROTEIN 3A|SIMIP|T12J5.9|plasma membrane intrinsic protein 3	plasma membrane intrinsic protein 3	protein-coding
1174	1	20815194	20815360	+	0	NA	Intergenic	Intergenic	-2437	AT1G55690.1	842018	At.21485	NM_104445		AT1G55690	F20N2.11	Sec14p-like phosphatidylinositol transfer family protein	protein-coding
3989	3	19236927	19237057	+	0	NA	Intergenic	Intergenic	-2435	AT3G51860.1	824349	At.11926	NM_115045		CAX3	ATCAX3|ATHCX1|CALCIUM/PROTON EXCHANGER CAX1-LIKE PROTEIN|CAX1-LIKE|cation exchanger 3	vacuolar cation/proton exchanger 3	protein-coding
6132	5	15632074	15632229	+	0	NA	Intergenic	Intergenic	-2435	AT5G39050.1	833897	At.22519	NM_123267		AT5G39050	MXF12.60|MXF12_60	phenolic glucoside malonyltransferase 1	protein-coding
1482	1	25997563	25997729	+	0	NA	Intergenic	Intergenic	-2434	AT1G69150.1	843246	At.66120	NM_105582		AT1G69150	F4N2.11|F4N2_11	cysteine/histidine-rich C1 domain-containing protein	protein-coding
471	1	6016244	6016410	+	0	NA	Intergenic	Intergenic	-2430	AT1G17500.1	838324	At.27975	NM_101612		AT1G17500	F1L3.21|F1L3_21	ATPase E1-E2 type family protein / haloacid dehalogenase-like hydrolase family protein	protein-coding
5053	4	14822930	14823113	+	0	NA	Intergenic	Intergenic	-2429	AT4G30270.1	829150	At.20967	NM_119173		XTH24	F9N11.120|F9N11_120|MERI-5|MERI5B|MERISTEM 5|SEN4|SENESCENCE 4|meristem-5|xyloglucan endotransglucosylase/hydrolase 24	xyloglucan endotransglucosylase/hydrolase protein 24	protein-coding
6648	5	24085771	24085946	+	0	NA	Intergenic	Intergenic	-2427	AT5G59780.1	836099	At.22428	NM_125370		MYB59	ATMYB59|ATMYB59-1|ATMYB59-2|ATMYB59-3|MTH12.19|MTH12_19|MYB DOMAIN PROTEIN 59|myb domain protein 59	transcription factor MYB59	protein-coding
704	1	8697272	8697380	+	0	NA	Intergenic	Intergenic	-2425	AT1G24540.1	839069	At.41418	NM_102298		CYP86C1	F21J9.20|cytochrome P450|family 86|polypeptide 1|subfamily C	cytochrome P450, family 86, subfamily C, polypeptide 1	protein-coding
1519	1	26256417	26256616	+	0	NA	Intergenic	Intergenic	-2423	AT1G69780.1	843314	At.23736	NM_105646		ATHB13	HOMEODOMAIN LEUCINE-ZIPPER PROTEIN ATHB13|T6C23.2|T6C23_2	homeobox-leucine zipper protein ATHB-13	protein-coding
3946	3	18819568	18819742	+	0	NA	Intergenic	Intergenic	-2411	AT3G50660.1	824229	At.26401	NM_114926		DWF4	CLM|CLOMAZONE-RESISTANT|CYP90B1|CYTOCHROME P450 90B1|DWARF 4|PARTIALLY SUPPRESSING COI1 INSENSITIVITY TO JA 1|PSC1|SAV1|SHADE AVOIDANCE 1|SNP2|STEROID 22-ALPHA-HYDROXYLASE|SUPPRESSOR OF NPH4 2	cytochrome P450 90B1	protein-coding
4873	4	12379347	12379523	+	0	NA	Intergenic	Intergenic	-2410	AT4G23760.1	828476	At.32409	NM_118507		AT4G23760	F9D16.230|F9D16_230	Cox19-like CHCH family protein	protein-coding
4960	4	13685861	13686030	+	0	NA	Intergenic	Intergenic	-2407	AT4G27330.1	828841	At.2342	NM_118867		SPL	F27G19.11|NOZZLE|NZZ|SPOROCYTELESS	putative transcription factor SPL	protein-coding
2717	2	16820785	16820976	+	0	NA	Intergenic	Intergenic	-2407	AT2G40260.1	818618	At.53083	NM_129584		AT2G40260	T7M7.13	myb family transcription factor	protein-coding
4069	3	20378832	20379024	+	0	NA	Intergenic	Intergenic	-2406	AT3G54990.1	824664	At.50279	NM_115356		SMZ	SCHLAFMUTZE|T15C9.6	AP2-like ethylene-responsive transcription factor SMZ	protein-coding
2257	2	10308197	10308295	+	0	NA	Intergenic	Intergenic	-2402	AT2G24240.1	816958	At.39188	NM_127985		AT2G24240	F27D4.15|F27D4_15	BTB/POZ domain with WD40/YVTN repeat-containing protein	protein-coding
5447	5	318209	318386	+	0	NA	Intergenic	Intergenic	-2398	AT5G01830.1	831850	At.33496	NM_120261		AT5G01830	T20L15.100|T20L15_100	ARM repeat superfamily protein	protein-coding
2757	2	17242753	17242923	+	0	NA	Intergenic	Intergenic	-2398	AT2G41370.1	818735	At.43967	NM_129700		BOP2	BLADE ON PETIOLE2|F13H10.8|F13H10_8	NPR1 like protein BOP2	protein-coding
6674	5	24476805	24476971	+	0	NA	Intergenic	Intergenic	-2397	AT5G60840.1	836205	At.29140	NM_125477		AT5G60840	MAE1.8|MAE1_8	hypothetical protein	protein-coding
6459	5	21736368	21736542	+	0	NA	Intergenic	Intergenic	-2394	AT5G53510.1	835433	At.55524	NM_124731		OPT9	ATOPT9|MNC6.5|MNC6_5|oligopeptide transporter 9	oligopeptide transporter 9	protein-coding
6421	5	21304563	21304753	+	0	NA	Intergenic	ATREP15|RC|Helitron	-2391	AT5G52510.1	835327	At.22412	NM_124630		SCL8	SCARECROW-like 8|T4M5.2|T4M5_2	scarecrow-like protein 8	protein-coding
1955	2	380777	380899	+	0	NA	Intergenic	Intergenic	-2391	AT2G01840.1	3768258				AT2G01840	T23K3.3|T23K3_3	pseudo	pseudo
6211	5	17449194	17449369	+	0	NA	Intergenic	Intergenic	-2388	AT5G43420.1	834362	At.7156	NM_123708		AT5G43420	MWF20.13|MWF20_13	RING-H2 finger protein	protein-coding
6668	5	24394579	24394692	+	0	NA	Intergenic	Intergenic	-2388	AT5G60690.1	836190	At.7238	NM_125462		REV	HOMEODOMAIN-LEUCINE ZIPPER PROTEIN|HOMEODOMAIN-LEUCINE ZIPPER PROTEIN IFL1|IFL|IFL1|INTERFASCICULAR FIBERLESS|INTERFASCICULAR FIBERLESS 1|MUP24.16|MUP24_16|REVOLUTA	homeobox-leucine zipper protein REVOLUTA	protein-coding
5683	5	3529938	3530106	+	0	NA	Intergenic	Intergenic	-2380	AT5G11100.1	830978	At.54810	NM_121148		SYTD	ATSYTD|NTMC2T2.2|NTMC2TYPE2.2|SYT4|T5K6.90|T5K6_90|synaptotagmin 4	synaptotagmin-4	protein-coding
4943	4	13250204	13250403	+	0	NA	Intergenic	Intergenic	-2377	AT4G26140.1	828720	At.2962	NM_118747		BGAL12	F20B18.250|F20B18_250|beta-galactosidase 12	beta-galactosidase 12	protein-coding
2516	2	14331301	14331408	+	0	NA	Intergenic	Intergenic	-2376	AT2G33860.1	817956	At.10360	NM_128946		ETT	ARF3|AUXIN RESPONSE TRANSCRIPTION FACTOR 3|ETTIN|T1B8.30|T1B8_30	auxin response transcription factor 3	protein-coding
6413	5	21136410	21136565	+	0	NA	Intergenic	Intergenic	-2375	AT5G52050.1	835280	At.29643	NM_124584		AT5G52050	MSG15.13|MSG15_13	MATE efflux family protein	protein-coding
2079	2	7258866	7259045	+	0	NA	Intergenic	Intergenic	-2375	AT2G16720.1	816173	At.5349	NM_127224		MYB7	ARABIDOPSIS THALIANA MYB DOMAIN PROTEIN 7|ATMYB7|ATY49|T24I21.13|T24I21_13|myb domain protein 7	myb domain protein 7	protein-coding
6789	5	25815617	25815793	+	0	NA	Intergenic	Intergenic	-2370	AT5G64570.1	836578	At.21526	NM_125853		XYL4	ARABIDOPSIS THALIANA BETA-D-XYLOSIDASE 4|ATBXL4|MUB3.9|MUB3_9|beta-D-xylosidase 4	beta-D-xylosidase 4	protein-coding
6796	5	25878621	25878775	+	0	NA	Intergenic	Intergenic	-2368	AT5G64740.1	836595	At.9777	NM_125870		CESA6	E112|ISOXABEN RESISTANT 2|IXR2|MVP7.7|MVP7_7|PRC1|PROCUSTE 1|cellulose synthase 6	cellulose synthase A catalytic subunit 6 [UDP-forming]	protein-coding
1651	1	27363509	27363564	+	0	NA	Intergenic	Intergenic	-2360	AT1G72700.1	843602	At.35067	NM_105929		AT1G72700	F28P22.11|F28P22_11	putative phospholipid-transporting ATPase 5	protein-coding
2590	2	15276324	15276507	+	0	NA	Intergenic	Intergenic	-2354	AT2G36410.1	818215	At.37557	NM_129198		AT2G36410	F1O11.4|F1O11_4	hypothetical protein	protein-coding
1322	1	23894427	23894626	+	0	NA	Intergenic	Intergenic	-2353	AT1G64380.1	842745	At.36008	NM_105113		AT1G64380	F15H21.12|F15H21_12	ethylene-responsive transcription factor ERF061	protein-coding
1228	1	21917299	21917492	+	0	NA	Intergenic	Intergenic	-2350	AT1G59650.1	842255	At.456	NM_104658		CW14	T30E16.22|T30E16_22	protein CW14	protein-coding
3326	3	4344133	4344291	+	0	NA	Intergenic	Intergenic	-2345	AT3G13380.1	820538	At.39430	NM_112183		BRL3	BRI1-like 3	receptor-like protein kinase BRI1-like 3	protein-coding
1453	1	25699566	25699752	+	0	NA	Intergenic	Intergenic	-2344	AT1G68500.1	843179	At.35514	NM_105521		AT1G68500	T26J14.7|T26J14_7	hypothetical protein	protein-coding
993	1	15880430	15880623	+	0	NA	Intergenic	ATREP3|RC|Helitron	-2342	AT1G42420.1	3767251				AT1G42420	F7F22.8|F7F22_8	pseudo	pseudo
5079	4	15227352	15227539	+	0	NA	Intergenic	Intergenic	-2340	AT4G31380.1	829265	At.51243	NM_119287		FLP1	F3L17.1|FPF1-like protein 1	flowering-promoting factor 1-like protein 1	protein-coding
869	1	10693131	10693219	+	0	NA	Intergenic	Intergenic	-2337	AT1G30330.2	839913	At.21939	NM_102771		ARF6	T4K22.6|T4K22_6|auxin response factor 6	auxin response factor 6	protein-coding
3374	3	4751500	4751683	+	0	NA	Intergenic	Intergenic	-2334	AT3G14270.1	820647	At.23226	NM_112285		FAB1B	FORMS APLOID AND BINUCLEATE CELLS 1B	phosphatidylinositol-3P 5-kinase-like	protein-coding
6010	5	8376410	8376590	+	0	NA	Intergenic	Intergenic	-2333	AT5G24530.1	832524	At.23761	NM_122361		DMR6	DOWNY MILDEW RESISTANT 6|K18P6.6|K18P6_6	putative 2OG-Fe(II) oxygenase	protein-coding
362	1	4894929	4895102	+	0	NA	Intergenic	Intergenic	-2331	AT1G14340.1	837995	At.26546	NM_101300		AT1G14340	F14L17.11|F14L17_11	RNA recognition motif-containing protein	protein-coding
6893	5	26763435	26763620	+	0	NA	Intergenic	Intergenic	-2330	AT5G67050.1	836840	At.50564	NM_126105		AT5G67050	K21H1.1|K21H1_1	alpha/beta-Hydrolases superfamily protein	protein-coding
2995	2	19466320	19466511	+	0	NA	Intergenic	Intergenic	-2328	AT2G47430.1	819356	At.341	NM_130311		CKI1	CYTOKININ-INDEPENDENT 1|HISTIDINE KINASE|T30B22.27	histidine kinase CKI1	protein-coding
3928	3	18668907	18669083	+	0	NA	Intergenic	Intergenic	-2323	AT3G50340.1	824196	At.1431	NM_114894		AT3G50340	-	hypothetical protein	protein-coding
1513	1	26242939	26243121	+	0	NA	Intergenic	Intergenic	-2322	AT1G69760.1	843312	At.46680	NM_105644		AT1G69760	T6C23.4|T6C23_4	hypothetical protein	protein-coding
4560	4	7861938	7862083	+	0	NA	Intergenic	Intergenic	-2319	AT4G13505.1	5008140				AT4G13505	-	ncRNA	ncRNA
6732	5	25083339	25083500	+	0	NA	Intergenic	Intergenic	-2318	AT5G62470.2	836367	At.9303	NM_125641		MYB96	ATMYB96|K19B1.8|K19B1_8|MYB DOMAIN PROTEIN 96|MYBCOV1|myb domain protein 96	Myb transcription factor	protein-coding
6021	5	8582259	8582435	+	0	NA	Intergenic	Intergenic	-2318	AT5G24920.1	832562	At.54984	NM_122401		GDU5	AtGDU5|F6A4.130|F6A4_130|glutamine dumper 5	glutamine dumper 5	protein-coding
6404	5	20943316	20943424	+	0	NA	Intergenic	Intergenic	-2315	AT5G51560.1	835230	At.29672	NM_124535		AT5G51560	K17N15.11|K17N15_11	leucine-rich repeat protein kinase	protein-coding
6744	5	25266155	25266274	+	0	NA	Intergenic	Intergenic	-2313	AT5G62950.3	836415	At.29025	NM_125689		AT5G62950	MQB2.27|MQB2_27	RNA polymerase II, Rpb4, core protein	protein-coding
3269	3	3657974	3658155	+	0	NA	Intergenic	Intergenic	-2313	AT3G11590.1	820332	At.17667	NM_111992		AT3G11590	-	hypothetical protein	protein-coding
4387	4	727503	727645	+	0	NA	Intergenic	Intergenic	-2313	AT4G01690.2	827991	At.19758	NM_116399		PPOX	HEMG1|PPO1|PROTOPORPHYRINOGEN OXIDASE	protoporphyrinogen oxidase	protein-coding
2795	2	17615736	17615917	+	0	NA	Intergenic	Intergenic	-2307	AT2G42280.1	818829	At.12448	NM_129790		AT2G42280	T24P15.19|T24P15_19	transcription factor bHLH130	protein-coding
2852	2	18234760	18234931	+	0	NA	Intergenic	Intergenic	-2307	AT2G44080.1	819014	At.36798	NM_180078		ARL	ARGOS-like|F6E13.21	ARGOS-like protein	protein-coding
4022	3	19740577	19740756	+	0	NA	Intergenic	Intergenic	-2302	AT3G53250.1	824492	At.53913	NM_115185		AT3G53250	-	SAUR-like auxin-responsive protein	protein-coding
5000	4	14196743	14196846	+	0	NA	Intergenic	Intergenic	-2302	AT4G28730.1	828994	At.31993	NM_119017		AT4G28730	F16A16.160|F16A16_160	glutaredoxin-C5	protein-coding
2248	2	10106247	10106416	+	0	NA	Intergenic	Intergenic	-2302	AT2G23755.1	816907	At.45723	NM_179712		AT2G23755	-	hypothetical protein	protein-coding
2612	2	15520576	15520678	+	0	NA	Intergenic	Intergenic	-2293	AT2G36960.1	818270	At.27079	NM_179942		TKI1	T1J8.14|T1J8_14|TSL-kinase interacting protein 1	TSL-kinase interacting protein 1	protein-coding
6706	5	24905348	24905470	+	0	NA	Intergenic	Intergenic	-2292	AT5G61990.1	836320	At.9377	NM_125592		AT5G61990	MTG10.2|MTG10_2	pentatricopeptide repeat-containing protein	protein-coding
1191	1	21134567	21134748	+	0	NA	Intergenic	Intergenic	-2287	AT1G56430.1	842096	At.66920	NM_104521		NAS4	ARABIDOPSIS THALIANA NICOTIANAMINE SYNTHASE 4|ATNAS4|F13N6.10|F13N6_10|nicotianamine synthase 4	nicotianamine synthase 4	protein-coding
1444	1	25624611	25624788	+	0	NA	Intergenic	Intergenic	-2287	AT1G68360.1	843165	At.66118	NM_105507		AT1G68360	T22E19.1|T22E19_1	zinc finger-related protein	protein-coding
435	1	5396616	5396798	+	0	NA	Intergenic	Intergenic	-2283	AT1G15690.2	838138	At.21942	NM_101437		AVP1	ARABIDOPSIS THALIANA V-PPASE 3|ATAVP3|AVP-3|AtVHP1;1|F7H2.3|F7H2_3|VACUOLAR H+ - PYROPHOSPHATASE AVP-3	Pyrophosphate-energized vacuolar membrane proton pump 1	protein-coding
4690	4	9904498	9904634	+	0	NA	Intergenic	Intergenic	-2282	AT4G17810.1	827503	At.32965	NM_117891		AT4G17810	DL4940W|FCAALL.130	C2H2 and C2HC zinc finger-containing protein	protein-coding
1464	1	25740204	25740364	+	0	NA	Intergenic	Intergenic	-2282	AT1G68560.1	843185	At.24728	NM_105527		XYL1	ALPHA-XYLOSIDASE 1|ATXYL1|F24J5.20|F24J5_20|TRG1|alpha-xylosidase 1|thermoinhibition resistant germination 1	bifunctional alpha-l-arabinofuranosidase/beta-d-xylosidase	protein-coding
4170	3	21677995	21678096	+	0	NA	Intergenic	Intergenic	-2281	AT3G58620.1	825031	At.34711	NM_115724		TTL4	tetratricopetide-repeat thioredoxin-like 4	TPR repeat-containing thioredoxin TTL4	protein-coding
6095	5	10800428	10800576	+	0	NA	Intergenic	Intergenic	-2280	AT5G28770.2	832990	At.15754	NM_122760		BZO2H3	Arabidopsis thaliana basic leucine zipper 63|AtbZIP63|T32B20.4|T32B20_4	basic leucine zipper 63	protein-coding
4784	4	11421941	11422126	+	0	NA	Intergenic	Intergenic	-2273	AT4G21440.1	826916	At.2261	NM_118264		MYB102	A. THALIANA MYB 4|ARABIDOPSIS THALIANA MYOSIN 4|ATM4|ATMYB102|F18E5.60|MYB-like 102	R2R3 family MYB transcription factor	protein-coding
5452	5	329413	329592	+	0	NA	Intergenic	Intergenic	-2271	AT5G01849.1	6241287	At.73450	NM_001125680		AT5G01849	-	hypothetical protein	protein-coding
2930	2	18891713	18891895	+	0	NA	Intergenic	Intergenic	-2270	AT2G45910.1	819199	At.36571	NM_130154		AT2G45910	F4I18.11	U-box domain-containing protein 33	protein-coding
6286	5	18902972	18903149	+	0	NA	Intergenic	Intergenic	-2265	AT5G46590.1	834702	At.51256	NM_124029		NAC096	F10E10.6|F10E10_6|NAC domain containing protein 96|anac096	NAC domain containing protein 96	protein-coding
4094	3	20771545	20771631	+	0	NA	Intergenic	Intergenic	-2264	AT3G55970.1	824763	At.5208	NM_115455		JRG21	ATJRG21|jasmonate-regulated gene 21	jasmonate-regulated protein JRG21	protein-coding
513	1	6513081	6513251	+	0	NA	Intergenic	Intergenic	-2263	AT1G18870.1	838468	At.43418	NM_101744		ICS2	ARABIDOPSIS ISOCHORISMATE SYNTHASE 2|ATICS2|F6A14.3|F6A14_3|isochorismate synthase 2	Isochorismate synthase 2	protein-coding
5694	5	3693514	3693688	+	0	NA	Intergenic	Intergenic	-2261	AT5G11530.1	831025	At.43396	NM_121191		EMF1	F15N18.120|F15N18_120|embryonic flower 1	embryonic flower 1	protein-coding
1625	1	27160467	27160657	+	0	NA	Intergenic	Intergenic	-2258	AT1G72180.1	843550	At.28051	NM_105877		AT1G72180	T9N14.3|T9N14_3	leucine-rich receptor-like protein kinase	protein-coding
4144	3	21295332	21295498	+	0	NA	Intergenic	Intergenic	-2257	AT3G57520.2	824919	At.22207	NM_115612		SIP2	AtSIP2|seed imbibition 2	putative galactinol--sucrose galactosyltransferase 2	protein-coding
6299	5	19100873	19101071	+	0	NA	Intergenic	Intergenic	-2257	AT5G47040.1	834750	At.8585	NM_124075		LON2	MQD22.18|MQD22_18|lon protease 2	lon protease-like 2	protein-coding
4083	3	20631277	20631421	+	0	NA	Intergenic	Intergenic	-2256	AT3G55610.2	824727	At.25196	NM_115419		P5CS2	delta 1-pyrroline-5-carboxylate synthase 2	delta 1-pyrroline-5-carboxylate synthase 2	protein-coding
3500	3	6345365	6345499	+	0	NA	Intergenic	Intergenic	-2254	AT3G18485.1	821378	At.53372	NM_148731		ILR2	IAA-LEUCINE RESISTANT 2	protein IAA-LEUCINE RESISTANT 2	protein-coding
1942	2	253991	254122	+	0	NA	Intergenic	Intergenic	-2250	AT2G01560.1	814685	At.52588	NM_126217		AT2G01560	F2I9.18|F2I9_18	hypothetical protein	protein-coding
2596	2	15373006	15373182	+	0	NA	Intergenic	Intergenic	-2248	AT2G36680.2	818240	At.28638	NM_179937		AT2G36680	F13K3.8|F13K3_8|VPS37-2	vacuolar protein-sorting-associated protein 37-2	protein-coding
2367	2	12145620	12145804	+	0	NA	Intergenic	Intergenic	-2247	AT2G28390.1	817387	At.21444	NM_128399		AT2G28390	T1B3.9|T1B3_9	SAND family protein	protein-coding
3314	3	4126069	4126251	+	0	NA	Intergenic	Intergenic	-2247	AT3G12930.1	820478	At.11983	NM_112129		AT3G12930	-	Lojap-related protein	protein-coding
1808	1	28877513	28877563	+	0	NA	Intergenic	Intergenic	-2246	AT1G76890.2	844024	At.25099	NM_106340		GT2	AT-GT2	trihelix transcription factor GT-2	protein-coding
1698	1	27972855	27973013	+	0	NA	Intergenic	Intergenic	-2245	AT1G74430.1	843784	At.11890	NM_106103		MYB95	ARABIDOPSIS THALIANA MYB DOMAIN CONTAINING PROTEIN 66|ARABIDOPSIS THALIANA MYB DOMAIN PROTEIN 95|ATMYB95|ATMYBCP66|F1M20.11|F1M20_11|myb domain protein 95	putative transcription factor MYB95	protein-coding
549	1	6910883	6911078	+	0	NA	Intergenic	Intergenic	-2239	AT1G19900.1	838578	At.16199	NM_101845		AT1G19900	F6F9.4|F6F9_4	glyoxal oxidase-related protein	protein-coding
5323	4	17761734	17761844	+	0	NA	Intergenic	Intergenic	-2232	AT4G37780.1	829934	At.10923	NM_119940		MYB87	ATMYB87|T28I19.60|T28I19_60|myb domain protein 87	myb domain protein 87	protein-coding
1849	1	29438722	29438884	+	0	NA	Intergenic	Intergenic	-2232	AT1G78240.2	844160	At.20566	NM_106474		TSD2	F3F9.21|F3F9_21|OSU1|QUA2|QUASIMODO2|TUMOROUS SHOOT DEVELOPMENT 2	putative pectin methyltransferase TSD2	protein-coding
3039	3	388776	388885	+	0	NA	Intergenic	Intergenic	-2227	AT3G02150.1	821061	At.10505	NM_111082		PTF1	CYCLOIDEA AND PCF TRANSCRIPTION FACTOR 13|F1C9.6|TCP13|TEOSINTE BRANCHED1|TFPD|plastid transcription factor 1	transcription factor TCP13	protein-coding
1202	1	21262090	21262223	+	0	NA	Intergenic	Intergenic	-2223	AT1G56710.1	842127	At.49984	NM_104548		AT1G56710	F25P12.85|F25P12_85	pectin lyase-like protein	protein-coding
6805	5	26027790	26027978	+	0	NA	Intergenic	Intergenic	-2216	AT5G65158.1	3771559	At.63376	NM_001037069		AT5G65158	-	lipase/lipooxygenase, PLAT/LH2 family protein	protein-coding
5364	4	18144103	18144295	+	0	NA	Intergenic	Intergenic	-2216	AT4G38900.2	830045	At.2835	NM_120050		AT4G38900	F19H22.5	Basic-leucine zipper (bZIP) transcription factor family protein	protein-coding
2720	2	16905777	16905958	+	0	NA	Intergenic	Intergenic	-2215	AT2G40470.1	818641	At.27426	NM_129608		LBD15	ASL11|ASYMMETRIC LEAVES2-LIKE 11|LOB domain-containing protein 15|T2P4.18|T2P4_18	LOB domain-containing protein 15	protein-coding
3845	3	17204003	17204191	+	0	NA	Intergenic	Intergenic	-2208	AT3G46700.1	823823	At.42959	NM_114537		AT3G46700	-	UDP-glycosyltransferase 76E3	protein-coding
3672	3	8908495	8908639	+	0	NA	Intergenic	Intergenic	-2203	AT3G24490.1	822039	At.37516	NM_113356		AT3G24490	-	alcohol dehydrogenase transcription factor myb/SANT-like protein	protein-coding
801	1	9809029	9809167	+	0	NA	Intergenic	Intergenic	-2202	AT1G28110.1	839704	At.48242	NM_102576		SCPL45	F13K9.20|F13K9_20|serine carboxypeptidase-like 45	serine carboxypeptidase-like 45	protein-coding
3880	3	17912652	17912799	+	0	NA	Intergenic	Intergenic	-2200	AT3G48360.1	823994	At.21922	NM_114697		BT2	ATBT2|BTB and TAZ domain protein 2	TAC1-mediated telomerase activation pathway protein BT2	protein-coding
155	1	1880724	1880886	+	0	NA	Intergenic	Intergenic	-2199	AT1G06160.1	837125	At.42354	NM_100497		ORA59	F9P14.2|F9P14_2|octadecanoid-responsive Arabidopsis AP2/ERF 59	ethylene-responsive transcription factor ERF094	protein-coding
3226	3	2845893	2846052	+	0	NA	Intergenic	Intergenic	-2191	AT3G09260.1	820082	At.18035	NM_111760		PYK10	BGLU23|LEB|LONG ER BODY|PSR3.1	beta-glucosidase 23	protein-coding
5812	5	5235896	5236081	+	0	NA	Intergenic	Intergenic	-2190	AT5G16030.2	831460	At.19750	NM_121608		AT5G16030	F1N13.170|F1N13_170	hypothetical protein	protein-coding
6889	5	26669141	26669333	+	0	NA	Intergenic	Intergenic	-2186	AT5G66800.1	836813	At.28849	NM_126078		AT5G66800	MUD21.4|MUD21_4	hypothetical protein	protein-coding
2752	2	17219661	17219836	+	0	NA	Intergenic	Intergenic	-2185	AT2G41310.1	818730	At.244	NM_129695		RR3	ARR8|ATRR3|RESPONSE REGULATOR 8|response regulator 3	response regulator 3	protein-coding
3574	3	7504963	7505151	+	0	NA	Intergenic	Intergenic	-2183	AT3G21330.1	821687	At.38078	NM_113028		AT3G21330	-	transcription factor bHLH87	protein-coding
6919	5	26901246	26901312	+	0	NA	Intergenic	Intergenic	-2182	AT5G67411.1	3771574	At.65711	NM_001037090		AT5G67411	-	putative GRAS family transcription factor	protein-coding
4084	3	20631948	20632098	+	0	NA	Intergenic	Intergenic	-2179	AT3G55620.1	824728	At.23205	NM_115420		emb1624	embryo defective 1624	eukaryotic translation initiation factor 6A	protein-coding
2881	2	18533843	18534018	+	0	NA	Intergenic	Intergenic	-2178	AT2G44930.1	819102	At.26361	NM_130058		AT2G44930	T13E15.6	hypothetical protein	protein-coding
4129	3	21145314	21145451	+	0	NA	Intergenic	Intergenic	-2176	AT3G57130.2	824880	At.53964	NM_115572		BOP1	BLADE ON PETIOLE 1	protein BLADE ON PETIOLE 1	protein-coding
3043	3	402532	402589	+	0	NA	Intergenic	Intergenic	-2173	AT3G02180.3	821277	At.19767	NM_111085		SP1L3	F1C9.3|SPIRAL1-like3	SPIRAL1-like3	protein-coding
4945	4	13279691	13279854	+	0	NA	Intergenic	Intergenic	-2165	AT4G26210.1	828727	At.2882	NM_118754		AT4G26210	T25K17.20|T25K17_20	ATP synthase subunit G protein	protein-coding
6098	5	12586581	12586768	+	0	NA	Intergenic	Intergenic	-2164	AT5G33320.1	833308	At.14730	NM_122856		CUE1	ARABIDOPSIS THALIANA PHOSPHATE/PHOSPHOENOLPYRUVATE TRANSLOCATOR|ARAPPT|CAB UNDEREXPRESSED 1|F19N2.40|F19N2_40|PHOSPHOENOLPYRUVATE/PHOSPHATE TRANSLOCATOR|PPT	phosphoenolpyruvate/phosphate translocator 1	protein-coding
2217	2	9819742	9819940	+	0	NA	Intergenic	Intergenic	-2164	AT2G23067.1	6241404	At.73763	NM_001124894		AT2G23067	-	putative membrane lipoprotein	protein-coding
4219	3	22364677	22364808	+	0	NA	Intergenic	Intergenic	-2163	AT3G60520.1	825223	At.34431	NM_115916		AT3G60520	-	hypothetical protein	protein-coding
248	1	3249994	3250161	+	0	NA	Intergenic	Intergenic	-2163	AT1G09970.1	837531	At.22076	NM_100871		LRR XI-23	F21M12.36|F21M12_36|RLK7|receptor-like kinase 7	leucine-rich receptor-like protein kinase	protein-coding
6898	5	26806378	26806447	+	0	NA	Intergenic	Intergenic	-2163	AT5G67180.1	836853	At.28821	NM_126118		TOE3	K21H1.22|K21H1_22|target of early activation tagged (EAT) 3	target of early activation tagged 3	protein-coding
5119	4	15667084	15667265	+	0	NA	Intergenic	Intergenic	-2161	AT4G32460.1	829381	At.24424	NM_119398		AT4G32460	F8B4.160|F8B4_160	hypothetical protein	protein-coding
6164	5	16524453	16524652	+	0	NA	Intergenic	Intergenic	-2160	AT5G41310.1	834132	At.55294	NM_123496		AT5G41310	K1O13.11|K1O13_11	kinesin-like protein	protein-coding
2036	2	4458223	4458384	+	0	NA	Intergenic	Intergenic	-2157	AT2G11220.1	3768340				AT2G11220	T13H18.12|T13H18_12	pseudo	pseudo
5590	5	2178164	2178363	+	0	NA	Intergenic	Intergenic	-2157	AT5G07010.1	830592	At.21805	NM_120783		ST2A	ARABIDOPSIS THALIANA SULFOTRANSFERASE 2A|ATST2A|MOJ9.18|MOJ9_18|sulfotransferase 2A	sulfotransferase 2A	protein-coding
2693	2	16565447	16565625	+	0	NA	Intergenic	Intergenic	-2156	AT2G39710.1	818555	At.20674	NM_129528		AT2G39710	F17A14.9	cysteine-rich peptide family protein	protein-coding
3514	3	6493329	6493527	+	0	NA	Intergenic	Intergenic	-2155	AT3G18830.1	821416	At.6395	NM_112769		PMT5	ARABIDOPSIS THALIANA POLYOL/MONOSACCHARIDE TRANSPORTER 5|ATPLT5|ATPMT5|POLYOL TRANSPORTER 5|polyol/monosaccharide transporter 5	polyol transporter 5	protein-coding
4732	4	10474831	10474963	+	0	NA	Intergenic	Intergenic	-2155	AT4G19150.1	827653	At.43375	NM_118034		AT4G19150	T18B16.120|T18B16_120	ankyrin repeat-containing protein	protein-coding
6033	5	8709808	8709996	+	0	NA	Intergenic	Intergenic	-2154	AT5G25190.1	832590	At.26169	NM_122428		AT5G25190	F21J6.103|F21J6_103	ethylene-responsive transcription factor ERF003	protein-coding
5611	5	2557583	2557763	+	0	NA	Intergenic	Intergenic	-2154	AT5G07980.1	830692	At.32645	NM_120880		AT5G07980	F13G24.2	dentin sialophosphoprotein-like protein	protein-coding
2385	2	12376181	12376187	+	0	NA	Intergenic	Intergenic	-2153	AT2G28840.1	817433	At.21021	NM_128443		XBAT31	F8N16.13|F8N16_13|XB3 ortholog 1 in Arabidopsis thaliana	putative E3 ubiquitin-protein ligase XBAT31	protein-coding
415	1	5196780	5196952	+	0	NA	Intergenic	Intergenic	-2152	AT1G15110.1	838074	At.41943	NM_101379		AT1G15110	F9L1.4|F9L1_4	phosphatidylserine synthase 1	protein-coding
2356	2	12021906	12022095	+	0	NA	Intergenic	Intergenic	-2149	AT2G28200.1	817366	At.39	NM_128380		AT2G28200	T3B23.13|T3B23_13	zinc finger protein ZAT5	protein-coding
773	1	9339844	9340026	+	0	NA	Intergenic	Intergenic	-2149	AT1G26930.1	839583	At.26913	NM_102457		AT1G26930	T2P11.12|T2P11_12	F-box/kelch-repeat protein	protein-coding
1611	1	27090804	27090959	+	0	NA	Intergenic	Intergenic	-2147	AT1G71970.1	843528	At.18058	NM_105855		AT1G71970	F17M19.12|F17M19_12	hypothetical protein	protein-coding
339	1	4580032	4580196	+	0	NA	Intergenic	Intergenic	-2147	AT1G13360.2	837896	At.44076	NM_148463		AT1G13360	-	hypothetical protein	protein-coding
3587	3	7711803	7711958	+	0	NA	Intergenic	Intergenic	-2147	AT3G21890.1	821744	At.37979	NM_113085		AT3G21890	-	B-box type zinc finger-containing protein	protein-coding
6352	5	20021228	20021395	+	0	NA	Intergenic	Intergenic	-2145	AT5G49370.1	834997	At.73924	NM_124314		AT5G49370	K7J8.4|K7J8_4	Pleckstrin homology (PH) domain-containing protein-like protein	protein-coding
6670	5	24417132	24417291	+	0	NA	Intergenic	Intergenic	-2143	AT5G60710.1	836192	At.21965	NM_125464		AT5G60710	MUP24.2|MUP24_2	C3H4 type zinc finger protein	protein-coding
3173	3	2009846	2010029	+	0	NA	Intergenic	Intergenic	-2142	AT3G06500.1	819828	At.40513	NM_111526		AT3G06500	F5E6.17|F5E6_17	protein alkaline/neutral invertase C	protein-coding
4809	4	11745360	11745547	+	0	NA	Intergenic	Intergenic	-2135	AT4G22190.1	828310	At.1969	NM_118341		AT4G22190	T10I14.20|T10I14_20	hypothetical protein	protein-coding
987	1	13999853	13999866	+	0	NA	Intergenic	Intergenic	-2129	AT1G36936.1	3767047				AT1G36936	-	pseudo	pseudo
4447	4	1508554	1508699	+	0	NA	Intergenic	Intergenic	-2126	AT4G03415.1	827930	At.45457	NM_148206		AT4G03415	-	putative protein phosphatase 2C 52	protein-coding
3838	3	17010506	17010700	+	0	NA	Intergenic	Intergenic	-2125	AT3G46290.1	823774	At.546	NM_114497		HERK1	hercules receptor kinase 1	receptor-like protein kinase HERK 1	protein-coding
2228	2	9872706	9872861	+	0	NA	Intergenic	Intergenic	-2124	AT2G23180.1	816850	At.12328	NM_127882		CYP96A1	T20D16.19|T20D16_19|cytochrome P450|family 96|polypeptide 1|subfamily A	cytochrome P450, family 96, subfamily A, polypeptide 1	protein-coding
2990	2	19363186	19363355	+	0	NA	Intergenic	Intergenic	-2123	AT2G47160.2	819329	At.24088	NM_180138		BOR1	REQUIRES HIGH BORON 1|T3D7.3	boron transporter 1	protein-coding
1667	1	27533038	27533113	+	0	NA	Intergenic	Intergenic	-2123	AT1G73210.2	843655	At.21507	NM_105980		AT1G73210	T18K17.12|T18K17_12	hypothetical protein	protein-coding
1284	1	23126523	23126641	+	0	NA	Intergenic	Intergenic	-2123	AT1G62480.1	842545	At.23177	NM_104927		AT1G62480	T3P18.4|T3P18_4	vacuolar calcium-binding protein-like protein	protein-coding
2264	2	10441321	10441514	+	0	NA	Intergenic	ATREP3|RC|Helitron	-2119	AT2G24570.1	816993	At.14192	NM_128018		WRKY17	ATWRKY17|F25P17.13|F25P17_13|WRKY DNA-binding protein 17	putative WRKY transcription factor 17	protein-coding
5015	4	14395403	14395577	+	0	NA	Intergenic	Intergenic	-2117	AT4G29190.1	829040	At.4530	NM_119063		AT4G29190	F17A13.10|F17A13_10	protein OXIDATION-RELATED ZINC FINGER 2	protein-coding
3862	3	17546912	17547103	+	0	NA	Intergenic	Intergenic	-2114	AT3G47610.1	823915	At.526	NM_114629		AT3G47610	-	transcription regulator/ zinc ion binding protein	protein-coding
3351	3	4508756	4508951	+	0	NA	Intergenic	Intergenic	-2112	AT3G13750.1	820584	At.21793	NM_112225		BGAL1	beta galactosidase 1|beta-galactosidase 1	beta galactosidase 1	protein-coding
1408	1	25031794	25031990	+	0	NA	Intergenic	Intergenic	-2104	AT1G67050.1	843025	At.28132	NM_105375		AT1G67050	F1O19.11|F1O19_11	hypothetical protein	protein-coding
1759	1	28444454	28444612	+	0	NA	Intergenic	Intergenic	-2104	AT1G75750.2	843908	At.24501	NM_106225		GASA1	F10A5.6|F10A5_6|GAST1 protein homolog 1	GA-responsive GAST1 protein-like protein	protein-coding
1374	1	24624020	24624187	+	0	NA	Intergenic	Intergenic	-2099	AT1G66140.1	842928	At.25527	NM_105285		ZFP4	F15E12.19|F15E12_19|zinc finger protein 4	zinc finger protein 4	protein-coding
659	1	8035155	8035275	+	0	NA	Intergenic	Intergenic	-2098	AT1G22710.1	838877	At.24746	NM_102118		SUC2	ARABIDOPSIS THALIANA SUCROSE-PROTON SYMPORTER 2|ATSUC2|SUCROSE TRANSPORTER 1|SUCROSE-H+ SYMPORTER|SUT1|T22J18.12|T22J18_12|sucrose-proton symporter 2	sucrose transport protein SUC2	protein-coding
3856	3	17478406	17478604	+	0	NA	Intergenic	Intergenic	-2098	AT3G47430.1	823897	At.35807	NM_114611		PEX11B	peroxin 11B	peroxisomal membrane protein 11B	protein-coding
1096	1	19427928	19428123	+	0	NA	Intergenic	Intergenic	-2097	AT1G52180.1	841648	At.52153	NM_104098		AT1G52180	F9I5.3|F9I5_3	aquaporin-like protein	protein-coding
407	1	5145694	5145877	+	0	NA	Intergenic	Intergenic	-2096	AT1G14910.1	838056	At.25101	NM_101360		AT1G14910	F10B6.32|F10B6_32	putative clathrin assembly protein	protein-coding
2672	2	16361820	16361979	+	0	NA	Intergenic	Intergenic	-2086	AT2G39200.1	818505	At.12809	NM_129478		MLO12	ATMLO12|MILDEW RESISTANCE LOCUS O 12|T16B24.16|T16B24_16	protein MILDEW RESISTANCE LOCUS O 12	protein-coding
4623	4	9252392	9252550	+	0	NA	Intergenic	Intergenic	-2084	AT4G16380.1	2745712	At.24999	NM_202830		AT4G16380	-	metal ion binding protein	protein-coding
3675	3	8925085	8925227	+	0	NA	Intergenic	BRODYAGA2|DNA|MuDR	-2083	AT3G24503.1	822042	At.22894	NM_113359		ALDH2C4	ALDH1A|REDUCED EPIDERMAL FLUORESCENCE1|REF1|aldehyde dehydrogenase 1A|aldehyde dehydrogenase 2C4	aldehyde dehydrogenase 2C4	protein-coding
1279	1	23022670	23022866	+	0	NA	Intergenic	Intergenic	-2083	AT1G62301.1	6241312	At.73819	NM_001124060		AT1G62301	-	hypothetical protein	protein-coding
1328	1	23908942	23909135	+	0	NA	Intergenic	Intergenic	-2081	AT1G64390.1	842747	At.17827	NM_105114		GH9C2	AtGH9C2|F15H21.9|F15H21_9|glycosyl hydrolase 9C2	glycosyl hydrolase 9C2	protein-coding
2459	2	13309487	13309624	+	0	NA	Intergenic	Intergenic	-2080	AT2G31230.1	817680	At.28356	NM_179831		ERF15	ATERF15|F16D14.7|F16D14_7|ethylene-responsive element binding factor 15	ethylene-responsive transcription factor 15	protein-coding
4884	4	12501631	12501791	+	0	NA	Intergenic	Intergenic	-2071	AT4G24060.1	828506	At.3662	NM_118538		AT4G24060	T19F6.50|T19F6_50	Dof zinc finger protein DOF4.6	protein-coding
2686	2	16547570	16547740	+	0	NA	Intergenic	Intergenic	-2071	AT2G39700.1	818553	At.22579	NM_129526		EXPA4	ATEXP4|ATEXPA4|ATHEXP ALPHA 1.6|F17A14.7|F17A14_7|expansin A4	expansin A4	protein-coding
3581	3	7635821	7636021	+	0	NA	Intergenic	Intergenic	-2068	AT3G21680.1	821722	At.38010	NM_113063		AT3G21680	-	hypothetical protein	protein-coding
5005	4	14331364	14331556	+	0	NA	Intergenic	Intergenic	-2068	AT4G29090.1	829030	At.54541	NM_119053		AT4G29090	F19B15.120|F19B15_120	ribonuclease H-like protein	protein-coding
5277	4	17469085	17469265	+	0	NA	Intergenic	Intergenic	-2066	AT4G37070.4	829861	At.23952	NM_119870		PLP1	AP22.83|AP22_83|AtPLAIVA|PLA IVA|phospholipase A IVA	patatin-related phospholipase A	protein-coding
652	1	7961910	7962046	+	0	NA	Intergenic	Intergenic	-2064	AT1G22540.1	838860	At.41595	NM_102103		AT1G22540	F12K8.12|F12K8_12	probable peptide/nitrate transporter	protein-coding
350	1	4771425	4771601	+	0	NA	Intergenic	Intergenic	-2063	AT1G13950.1	837955	At.24908	NM_101261		ELF5A-1	ATELF5A-1|EIF-5A|EIF5A|EUKARYOTIC ELONGATION FACTOR 5A|EUKARYOTIC ELONGATION FACTOR 5A-1|F16A14.17|eukaryotic elongation factor 5A-1	translation initiation factor eIF-5A	protein-coding
5290	4	17575924	17576076	+	0	NA	Intergenic	Intergenic	-2062	AT4G37380.1	829892	At.65465	NM_119901		AT4G37380	F6G17.30|F6G17_30	pentatricopeptide repeat-containing protein	protein-coding
4278	3	22917316	22917452	+	0	NA	Intergenic	Intergenic	-2059	AT3G61890.1	825362	At.25517	NM_116054		HB-12	ARABIDOPSIS THALIANA HOMEOBOX 12|ATHB-12|ATHB12|homeobox 12	homeobox-leucine zipper protein ATHB-12	protein-coding
2879	2	18521482	18521681	+	0	NA	Intergenic	Intergenic	-2056	AT2G44910.1	819100	At.44957	NM_130055		HB4	ARABIDOPSIS THALIANA HOMEOBOX-LEUCINE ZIPPER PROTEIN 4|ATHB-4|ATHB4|T13E15.8|homeobox-leucine zipper protein 4	homeobox-leucine zipper protein ATHB-4	protein-coding
4671	4	9757183	9757357	+	0	NA	Intergenic	Intergenic	-2055	AT4G17500.1	827464	At.23185	NM_117855		ERF-1	ATERF-1|DL4785W|FCAALL.123|ethylene responsive element binding factor 1	ethylene-responsive transcription factor 1A	protein-coding
6661	5	24314658	24314847	+	0	NA	Intergenic	Intergenic	-2054	AT5G60450.1	836166	At.6797	NM_125438		ARF4	MUF9.7|MUF9_7|auxin response factor 4	auxin response factor 4	protein-coding
6080	5	9947549	9947725	+	0	NA	Intergenic	Intergenic	-2049	AT5G27925.1	3770759				AT5G27925	-	pseudo	pseudo
6637	5	23898603	23898733	+	0	NA	Intergenic	Intergenic	-2049	AT5G59220.1	836040	At.22149	NM_125312		HAI1	MNC17.13|MNC17_13|highly ABA-induced PP2C gene 1	putative protein phosphatase 2C 78	protein-coding
1843	1	29385676	29385820	+	0	NA	Intergenic	Intergenic	-2047	AT1G78100.1	844146	At.22971	NM_106460		AT1G78100	T11I11.4|T11I11_4	F-box protein	protein-coding
754	1	9094407	9094587	+	0	NA	Intergenic	Intergenic	-2040	AT1G26270.1	839168	At.20251	NM_102391		AT1G26270	F28B23.7|F28B23_7	putative phosphatidylinositol 4-kinase type 2-beta	protein-coding
6133	5	15632449	15632648	+	0	NA	Intergenic	Intergenic	-2038	AT5G39050.1	833897	At.22519	NM_123267		AT5G39050	MXF12.60|MXF12_60	phenolic glucoside malonyltransferase 1	protein-coding
3728	3	9737486	9737668	+	0	NA	Intergenic	Intergenic	-2036	AT3G26530.1	822261				AT3G26530	-	pseudo	pseudo
1726	1	28238965	28239107	+	0	NA	Intergenic	Intergenic	-2036	AT1G75240.1	843861	At.34802	NM_106180		HB33	AtHB33|F22H5.4|F22H5_4|homeobox protein 33	homeobox protein 33	protein-coding
4725	4	10328246	10328425	+	0	NA	Intergenic	Intergenic	-2036	AT4G18820.1	827616	At.24326	NM_117998		AT4G18820	F28A21.230|F28A21_230	AAA-type ATPase family protein	protein-coding
6049	5	8861232	8861426	+	0	NA	Intergenic	Intergenic	-2034	AT5G25460.1	832620	At.19291	NM_122456		AT5G25460	F18G18.200|F18G18_200	UF642 l-GalL-responsive protein 1	protein-coding
154	1	1879483	1879640	+	0	NA	Intergenic	Intergenic	-2033	AT1G06148.2	5007666	At.68381	NM_001160837		AT1G06148	-	hypothetical protein	protein-coding
5479	5	623124	623319	+	0	NA	Intergenic	Intergenic	-2033	AT5G02760.1	831234	At.23648	NM_120354		AT5G02760	F9G14.70|F9G14_70	putative protein phosphatase 2C 67	protein-coding
2225	2	9868771	9868878	+	0	NA	Intergenic	Intergenic	-2032	AT2G23171.1	6241472	At.73759	NM_001124899		AT2G23171	-	hypothetical protein	protein-coding
5114	4	15597356	15597538	+	0	NA	Intergenic	Intergenic	-2028	AT4G32300.1	829365	At.27667	NM_119383		SD2-5	F10M6.60|F10M6_60|S-domain-2 5	G-type lectin S-receptor-like serine/threonine-protein kinase SD2-5	protein-coding
2087	2	7525559	7525746	+	0	NA	Intergenic	Intergenic	-2024	AT2G17305.1	816237	At.52784	NM_147325		AT2G17305	-	hypothetical protein	protein-coding
3540	3	6884263	6884412	+	0	NA	Intergenic	Intergenic	-2022	AT3G19820.2	821519	At.248	NM_112872		DWF1	CABBAGE 1|CBB1|DIM|DIM1|DIMINUTIA|DIMINUTO 1|DWARF 1|ENHANCED VERY-LOW-FLUENCE RESPONSES 1|EVE1	Delta(24)-sterol reductase	protein-coding
3926	3	18651475	18651611	+	0	NA	Intergenic	Intergenic	-2022	AT3G50310.1	824193	At.35507	NM_114891		MAPKKK20	mitogen-activated protein kinase kinase kinase 20	mitogen-activated protein kinase kinase kinase 20	protein-coding
6555	5	23002130	23002227	+	0	NA	Intergenic	Intergenic	-2018	AT5G56870.1	835789	At.21539	NM_125070		BGAL4	MPI10.3|MPI10_3|beta-galactosidase 4	beta-galactosidase 4	protein-coding
1575	1	26693195	26693389	+	0	NA	Intergenic	Intergenic	-2015	AT1G70770.1	843414	At.48357	NM_105745		AT1G70770	F5A18.5|F5A18_5	hypothetical protein	protein-coding
4156	3	21413702	21413839	+	0	NA	Intergenic	Intergenic	-2014	AT3G57810.2	824950	At.34796	NM_115643		AT3G57810	-	OTU-like cysteine protease domain-containing protein	protein-coding
3671	3	8904587	8904711	+	0	NA	Intergenic	Intergenic	-2011	AT3G24480.1	822038	At.37518	NM_113355		AT3G24480	-	leucine-rich repeat extensin-like protein 4	protein-coding
5541	5	1376711	1376885	+	0	NA	Intergenic	Intergenic	-2011	AT5G04760.1	830354	At.20111	NM_120558		AT5G04760	MUK11.7	duplicated SANT DNA-binding domain-containing protein	protein-coding
4223	3	22371154	22371268	+	0	NA	Intergenic	Intergenic	-2004	AT3G60530.1	825224	At.20781	NM_115917		GATA4	GATA transcription factor 4	GATA transcription factor 4	protein-coding
2089	2	7604033	7604215	+	0	NA	Intergenic	Intergenic	-2003	AT2G17490.1	3768408				AT2G17490	MJB20.5|MJB20_5	pseudo	pseudo
933	1	11831034	11831186	+	0	NA	Intergenic	Intergenic	-2003	AT1G32710.1	840165	At.51887	NM_103005		AT1G32710	F6N18.10|F6N18_10	putative cytochrome c oxidase subunit 6b-like	protein-coding
4589	4	8436977	8437168	+	0	NA	Intergenic	Intergenic	-1997	AT4G14720.1	827125	At.43699	NM_117557		PPD2	DL3400C|FCAALL.297|PEAPOD 2|TIFY4B	protein PEAPOD2	protein-coding
2967	2	19168907	19168986	+	0	NA	Intergenic	Intergenic	-1997	AT2G46680.2	819280	At.136	NM_130233		HB-7	ARABIDOPSIS THALIANA HOMEOBOX 7|ATHB-7|ATHB7|T3A4.6|homeobox 7	homeobox-leucine zipper protein ATHB-7	protein-coding
2907	2	18689662	18689789	+	0	NA	Intergenic	Intergenic	-1997	AT2G45340.1	819142	At.27801	NM_130097		AT2G45340	F4L23.15	putative leucine-rich repeat transmembrane protein kinase	protein-coding
389	1	5070550	5070720	+	0	NA	Intergenic	Intergenic	-1990	AT1G14720.1	838037	At.279	NM_101341		XTH28	ATXTH28|ENDOXYLOGLUCAN TRANSFERASE A2|EXGT-A2|F10B6.12|F10B6_12|XTR2|XYLOGLUCAN ENDOTRANSGLYCOSYLASE-RELATED PROTEIN|xyloglucan endotransglucosylase/hydrolase 28|xyloglucan endotransglycosylase related 2	probable xyloglucan endotransglucosylase/hydrolase protein 28	protein-coding
380	1	5005261	5005452	+	0	NA	Intergenic	Intergenic	-1986	AT1G14600.1	838022	At.41962	NM_101327		AT1G14600	T5E21.10|T5E21_10	putative Myb family transcription factor	protein-coding
1123	1	20046539	20046663	+	0	NA	Intergenic	Intergenic	-1985	AT1G53700.1	841807	At.37354	NM_104248		WAG1	F22G10.21|F22G10_21|PK3AT|PROTEIN KINASE 3 ARABIDOPSIS THALIANA|WAG 1	protein WAG1	protein-coding
5573	5	1896024	1896195	+	0	NA	Intergenic	Intergenic	-1985	AT5G06250.2	830512	At.54745	NM_120707		AT5G06250	MHF15.23|MHF15_23	AP2/B3-like transcriptional factor family protein	protein-coding
6769	5	25701122	25701270	+	0	NA	Intergenic	Intergenic	-1984	AT5G64250.2	836546	At.20388	NM_125821		AT5G64250	MSJ1.9|MSJ1_9	Aldolase-type TIM barrel family protein	protein-coding
5970	5	7498683	7498850	+	0	NA	Intergenic	Intergenic	-1982	AT5G22570.1	832320	At.27347	NM_122163		WRKY38	ARABIDOPSIS THALIANA WRKY DNA-BINDING PROTEIN 38|ATWRKY38|MQJ16.11|MQJ16_11|WRKY DNA-binding protein 38	putative WRKY transcription factor 38	protein-coding
733	1	8937351	8937527	+	0	NA	Intergenic	Intergenic	-1979	AT1G25440.1	839130	At.27494	NM_102355		AT1G25440	F2J7.10|F2J7_10	zinc finger protein CONSTANS-LIKE 16	protein-coding
3768	3	10909133	10909230	+	0	NA	Intergenic	Intergenic	-1976	AT3G28910.1	822525	At.10902	NM_113812		MYB30	ATMYB30|myb domain protein 30	myb domain protein 30	protein-coding
2833	2	17907112	17907306	+	0	NA	Intergenic	Intergenic	-1976	AT2G43060.1	818908	At.27337	NM_129867		IBH1	ILI1 binding bHLH 1|MFL8.8	ILI1 binding bHLH 1 protein	protein-coding
2574	2	15086384	15086513	+	0	NA	Intergenic	Intergenic	-1975	AT2G35930.1	818166	At.43241	NM_129152		PUB23	F11F19.16|F11F19_16|plant U-box 23	E3 ubiquitin-protein ligase PUB23	protein-coding
4698	4	9996305	9996471	+	0	NA	Intergenic	Intergenic	-1968	AT4G18010.1	827526	At.2057	NM_117911		5PTASE2	4|5)P3 5-PHOSPHATASE II|AT5PTASE2|INOSITOL POLYPHOSPHATE 5-PHOSPHATASE II|INOSITOL(1|IP5PII|T6K21.190|T6K21_190|myo-inositol polyphosphate 5-phosphatase 2	Type I inositol-1,4,5-trisphosphate 5-phosphatase 2	protein-coding
743	1	8984913	8985105	+	0	NA	Intergenic	Intergenic	-1968	AT1G25560.1	839143	At.17318	NM_102367		TEM1	EDF1|ETHYLENE RESPONSE DNA BINDING FACTOR 1|F2J7.3|F2J7_3|TEMPRANILLO 1	AP2/ERF and B3 domain-containing transcription repressor TEM1	protein-coding
4832	4	12064764	12064886	+	0	NA	Intergenic	Intergenic	-1967	AT4G23010.3	828400	At.23149	NM_118430		UTR2	ATUTR2|F7H19.200|F7H19_200|UDP-galactose transporter 2	UDP-galactose transporter 2	protein-coding
4800	4	11632952	11633137	+	0	NA	Intergenic	Intergenic	-1966	AT4G21910.1	828280	At.22674	NM_118312		AT4G21910	T8O5.120|T8O5_120	MATE efflux family protein	protein-coding
1644	1	27300419	27300615	+	0	NA	Intergenic	Intergenic	-1961	AT1G72500.1	843582	At.35090	NM_105909		AT1G72500	T10D10.3|T10D10_3	hypothetical protein	protein-coding
874	1	10713612	10713798	+	0	NA	Intergenic	Intergenic	-1960	AT1G30360.1	839916	At.25329	NM_102773		ERD4	T4K22.4|T4K22_4|early-responsive to dehydration 4	Early-responsive to dehydration stress protein (ERD4)	protein-coding
887	1	10958893	10959081	+	0	NA	Intergenic	Intergenic	-1954	AT1G30825.1	839965	At.21573	NM_102820		DIS2	ACTIN-RELATED PROTEIN C2A|ARPC2A|DISTORTED TRICHOMES 2	actin-related protein C2A	protein-coding
2374	2	12202623	12202812	+	0	NA	Intergenic	Intergenic	-1952	AT2G28510.1	817399	At.28359	NM_128411		AT2G28510	T17D12.7|T17D12_7	Dof zinc finger protein DOF2.1	protein-coding
4403	4	919452	919561	+	0	NA	Intergenic	Intergenic	-1948	AT4G02080.1	827368	At.24077	NM_116440		SAR2	ASAR1|ATSAR2|ATSARA1C|T10M13.9|T10M13_9|secretion-associated RAS super family 2	GTP-binding protein SAR1A	protein-coding
4038	3	19994564	19994757	+	0	NA	Intergenic	Intergenic	-1947	AT3G54000.1	824567	At.21821	NM_115260		AT3G54000	-	hypothetical protein	protein-coding
1325	1	23897996	23898186	+	0	NA	Intergenic	Intergenic	-1944	AT1G64385.1	842746	At.20348	NM_148627		AT1G64385	-	hypothetical protein	protein-coding
1985	2	834326	834470	+	0	NA	Intergenic	Intergenic	-1943	AT2G02860.1	814817	At.10182	NM_126341		SUT2	ARABIDOPSIS THALIANA SUCROSE TRANSPORTER 3|ATSUC3|ATSUT2|SUC3|SUCROSE TRANSPORTER 3|T17M13.3|T17M13_3|sucrose transporter 2	sucrose transport protein SUC3	protein-coding
6000	5	8124636	8124814	+	0	NA	Intergenic	Intergenic	-1941	AT5G24030.1	832468	At.6575	NM_122308		SLAH3	MZF18.9|MZF18_9|SLAC1 homologue 3	SLAC1 homologue 3	protein-coding
2806	2	17721929	17722111	+	0	NA	Intergenic	Intergenic	-1940	AT2G42570.1	818857	At.14364	NM_129818		TBL39	F14N22.16|F14N22_16|TRICHOME BIREFRINGENCE-LIKE 39	protein trichome birefringence-like 39	protein-coding
6683	5	24540535	24540588	+	0	NA	Intergenic	Intergenic	-1938	AT5G60978.1	5008321				AT5G60978	-	pseudo	pseudo
2950	2	19031799	19031812	+	0	NA	Intergenic	Intergenic	-1936	AT2G46370.4	819244	At.13902	NM_130200		JAR1	F11C10.6|FAR-RED INSENSITIVE 219|FIN219|JASMONATE RESISTANT 1	jasmonic acid-amido synthetase JAR1	protein-coding
1294	1	23394725	23394847	+	0	NA	Intergenic	Intergenic	-1935	AT1G63090.1	842612	At.17747	NM_104987		PP2-A11	AtPP2-A11|F16M19.16|F16M19_16|phloem protein 2-A11	phloem protein 2-A11	protein-coding
5	1	21126	21299	+	0	NA	Intergenic	Intergenic	-1934	AT1G01040.1	839574	At.22088	NM_099986		DCL1	ABNORMAL SUSPENSOR 1|ASU1|ATDCL1|CAF|CARPEL FACTORY|DICER-LIKE 1|EMB60|EMB76|EMBRYO DEFECTIVE 60|EMBRYO DEFECTIVE 76|SHORT INTEGUMENTS 1|SIN1|SUS1|SUSPENSOR 1|T25K16.4|T25K16_4|dicer-like 1	endoribonuclease Dicer-like 1	protein-coding
1451	1	25691422	25691611	+	0	NA	Intergenic	ATREP10D|RC|Helitron	-1933	AT1G68490.1	843178	At.35516	NM_105520		AT1G68490	T26J14.6|T26J14_6	hypothetical protein	protein-coding
4902	4	12774341	12774481	+	0	NA	Intergenic	Intergenic	-1932	AT4G24780.2	828580	At.23543	NM_118611		AT4G24780	F6I7.12	putative pectate lyase 18	protein-coding
2381	2	12310482	12310635	+	0	NA	Intergenic	Intergenic	-1930	AT2G28690.1	817418	At.38582	NM_128430		AT2G28690	T8O18.2|T8O18_2	hypothetical protein	protein-coding
6027	5	8691113	8691310	+	0	NA	Intergenic	Intergenic	-1926	AT5G25170.1	832588	At.28576	NM_122426		AT5G25170	F21J6.101|F21J6_101	PPPDE putative thiol peptidase family protein	protein-coding
404	1	5131355	5131543	+	0	NA	Intergenic	Intergenic	-1926	AT1G14870.1	838052	At.43506	NM_101356		PCR2	F10B6.27|F10B6_27|PLANT CADMIUM RESISTANCE 2	cadmium resistance protein 2	protein-coding
2756	2	17242269	17242462	+	0	NA	Intergenic	Intergenic	-1925	AT2G41370.1	818735	At.43967	NM_129700		BOP2	BLADE ON PETIOLE2|F13H10.8|F13H10_8	NPR1 like protein BOP2	protein-coding
1681	1	27709346	27709529	+	0	NA	Intergenic	Intergenic	-1919	AT1G73680.2	843703	At.19772	NM_106027		ALPHA DOX2	F25P22.10|F25P22_10|alpha dioxygenase	alpha dioxygenase	protein-coding
3273	3	3692988	3693150	+	0	NA	Intergenic	Intergenic	-1919	AT3G11690.1	820341	At.24161	NM_112001		AT3G11690	-	hypothetical protein	protein-coding
6679	5	24491615	24491777	+	0	NA	Intergenic	Intergenic	-1918	AT5G60880.2	836209	At.51260	NM_125481		BASL	BREAKING OF ASYMMETRY IN THE STOMATAL LINEAGE|MAE1.13|MAE1_13	protein BREAKING OF ASYMMETRY IN THE STOMATAL LINEAGE	protein-coding
2922	2	18812910	18813017	+	0	NA	Intergenic	Intergenic	-1916	AT2G45660.1	819174	At.25546	NM_130128		AGL20	AGAMOUS-like 20|ATSOC1|F17K2.19|MADS-BOX PROTEIN AGL20|SOC1|SUPPRESSOR OF OVEREXPRESSION OF CO 1	MADS-box protein SOC1	protein-coding
5448	5	318766	318799	+	0	NA	Intergenic	Intergenic	-1913	AT5G01830.1	831850	At.33496	NM_120261		AT5G01830	T20L15.100|T20L15_100	ARM repeat superfamily protein	protein-coding
841	1	10242970	10243143	+	0	NA	Intergenic	Intergenic	-1910	AT1G29290.1	839803	At.40770	NM_102669		AT1G29290	F28N24.30|F28N24_30	hypothetical protein	protein-coding
2811	2	17754141	17754323	+	0	NA	Intergenic	Intergenic	-1908	AT2G42620.1	818862	At.21231	NM_129823		MAX2	F14N22.11|F14N22_11|MORE AXILLARY BRANCHES 2|ORE9|ORESARA 9|PLEIOTROPIC PHOTOSIGNALING|PPS	F-box leucine-rich repeat family protein MAX2	protein-coding
2963	2	19142573	19142736	+	0	NA	Intergenic	Intergenic	-1907	AT2G46620.1	819274	At.19721	NM_130227		AT2G46620	F13A10.15	P-loop containing nucleoside triphosphate hydrolases superfamily protein	protein-coding
6096	5	10806702	10806894	+	0	NA	Intergenic	Intergenic	-1904	AT5G28776.1	3770837				AT5G28776	-	pseudo	pseudo
2809	2	17726718	17726907	+	0	NA	Intergenic	Intergenic	-1903	AT2G42580.1	818858	At.14365	NM_129819		TTL3	F14N22.15|F14N22_15|VHI-INTERACTING TPR CONTAINING PROTEIN|VIT|tetratricopetide-repeat thioredoxin-like 3	tetratricopetide-repeat thioredoxin-like 3	protein-coding
5381	4	18322714	18322806	+	0	NA	Intergenic	Intergenic	-1901	AT4G39400.1	830095	At.27898	NM_120100		BRI1	ATBRI1|BIN1|BR INSENSITIVE 1|BRASSINOSTEROID INSENSITIVE 1|CABBAGE 2|CBB2|DWARF 2|DWF2|F23K16.30|F23K16_30	protein brassinosteroid insensitive 1	protein-coding
6514	5	22335706	22335895	+	0	NA	Intergenic	Intergenic	-1901	AT5G55050.1	835596	At.29465	NM_124887		AT5G55050	K13P22.5|K13P22_5	GDSL esterase/lipase	protein-coding
4075	3	20476612	20476715	+	0	NA	Intergenic	Intergenic	-1900	AT3G55240.1	824690	At.35039	NM_115382		AT3G55240	-	hypothetical protein	protein-coding
6463	5	21769864	21769959	+	0	NA	Intergenic	Intergenic	-1900	AT5G53588.1	6240765	At.29547	NM_001125958		CPuORF50	conserved peptide upstream open reading frame 50	conserved peptide upstream open reading frame 50	protein-coding
5046	4	14792339	14792460	+	0	NA	Intergenic	Intergenic	-1898	AT4G30200.2	829143	At.21785	NM_119166		VEL1	vernalization5/VIN3-like	vernalization5/VIN3-like protein	protein-coding
1828	1	29280320	29280502	+	0	NA	Intergenic	Intergenic	-1893	AT1G77855.1	844121	At.50663	NM_148664		AT1G77855	-	hypothetical protein	protein-coding
5122	4	15705492	15705686	+	0	NA	Intergenic	Intergenic	-1892	AT4G32551.2	829390	At.22027	NM_119407		LUG	L23H3.30|L23H3_30|LEUNIG|RON2|ROTUNDA 2	transcriptional corepressor LEUNIG	protein-coding
4539	4	7355197	7355335	+	0	NA	Intergenic	Intergenic	-1890	AT4G12423.1	3770462				AT4G12423	-	pseudo	pseudo
2891	2	18622296	18622456	+	0	NA	Intergenic	Intergenic	-1888	AT2G45170.1	819125	At.24840	NM_130080		ATG8E	ATATG8E|AUTOPHAGY 8E|T14P1.2	autophagy-related protein 8e	protein-coding
6475	5	21885997	21886162	+	0	NA	Intergenic	Intergenic	-1887	AT5G53902.1	3771501				U3B	U3 small nucleolar RNAb	ncRNA	ncRNA
6602	5	23415441	23415584	+	0	NA	Intergenic	Intergenic	-1885	AT5G57790.1	835888	At.29311	NM_125163		AT5G57790	MTI20.2|MTI20_2	hypothetical protein	protein-coding
2840	2	18005740	18005887	+	0	NA	Intergenic	Intergenic	-1884	AT2G43340.1	818935	At.28611	NM_180063		AT2G43340	T1O24.8	hypothetical protein	protein-coding
1522	1	26264650	26264801	+	0	NA	Intergenic	Intergenic	-1884	AT1G69790.1	843315	At.35374	NM_105647		AT1G69790	T6C23.1|T6C23_1	putative protein serine/threonine kinase	protein-coding
3427	3	5256345	5256544	+	0	NA	Intergenic	Intergenic	-1882	AT3G15530.1	820792	At.27561	NM_112421		AT3G15530	-	S-adenosyl-L-methionine-dependent methyltransferases superfamily protein	protein-coding
2297	2	11176142	11176294	+	0	NA	Intergenic	Intergenic	-1882	AT2G26260.1	817166	At.38921	NM_128183		3BETAHSD/D2	3beta-hydroxysteroid-dehydrogenase/decarboxylase isoform 2|AT3BETAHSD/D|AT3BETAHSD/D2|T1D16.10|T1D16_10	3beta-hydroxysteroid-dehydrogenase/decarboxylase isoform 2	protein-coding
6577	5	23238359	23238547	+	0	NA	Intergenic	Intergenic	-1881	AT5G57350.2	835841	At.290	NM_125118		HA3	AHA3|ARABIDOPSIS THALIANA ARABIDOPSIS H(+)-ATPASE|ATAHA3|H(+)-ATPase 3|MJB24.16|MJB24_16|P-TYPE H(+)-ATPASE ISOFORM 3	H(+)-ATPase 3	protein-coding
3233	3	3049018	3049198	+	0	NA	Intergenic	Intergenic	-1881	AT3G09922.1	820152	At.47056	NM_180219		IPS1	A. THALIANA INDUCED BY PHOSPHATE STARVATION1|ATIPS1|INDUCED BY PHOSPHATE STARVATION1	protein ED BY PHOSPHATE STARVATION1	protein-coding
5850	5	5914893	5915066	+	0	NA	Intergenic	Intergenic	-1880	AT5G17880.1	831656	At.31499	NM_121794		CSA1	MPI7.20|MPI7_20|constitutive shade-avoidance1	TIR-NBS-LRR class disease resistance protein	protein-coding
3583	3	7657793	7657988	+	0	NA	Intergenic	Intergenic	-1879	AT3G21720.1	821726	At.38005	NM_113067		ICL	isocitrate lyase	isocitrate lyase	protein-coding
4590	4	8437955	8438089	+	0	NA	Intergenic	Intergenic	-1877	AT4G14723.1	3769880	At.51142	NM_001036564		AT4G14723	-	epidermal patterning factor-like protein 4	protein-coding
3733	3	9807507	9807678	+	0	NA	Intergenic	Intergenic	-1877	AT3G26690.2	822281	At.21140	NM_113580		NUDX13	ARABIDOPSIS THALIANA NUDIX HYDROLASE HOMOLOG 13|ATNUDT13|ATNUDX13|nudix hydrolase homolog 13	nudix hydrolase 13	protein-coding
1255	1	22596868	22597024	+	0	NA	Intergenic	Intergenic	-1877	AT1G61260.1	842420	At.10420	NM_104807		AT1G61260	F11P17.2|F11P17_2	hypothetical protein	protein-coding
1483	1	25998240	25998437	+	0	NA	Intergenic	Intergenic	-1876	AT1G69160.1	843247	At.26613	NM_105583		AT1G69160	F4N2.12|F4N2_12	hypothetical protein	protein-coding
1143	1	20165567	20165676	+	0	NA	Intergenic	ATREP10A|RC|Helitron	-1873	AT1G54020.3	841840	At.20006	NM_104279		AT1G54020	F15I1.10|F15I1_10	GDSL esterase/lipase	protein-coding
2197	2	9675912	9676103	+	0	NA	Intergenic	Intergenic	-1873	AT2G22760.1	816806	At.39393	NM_127841		AT2G22760	T30L20.2|T30L20_2	transcription factor bHLH19	protein-coding
2727	2	16952337	16952514	+	0	NA	Intergenic	Intergenic	-1868	AT2G40610.1	818656	At.42931	NM_129623		EXPA8	ATEXP8|ATEXPA8|ATHEXP ALPHA 1.11|EXP8|T2P4.4|T2P4_4|expansin A8	expansin A8	protein-coding
6218	5	17576745	17576931	+	0	NA	Intergenic	ATREP9|RC|Helitron	-1867	AT5G43745.1	834395	At.26498	NM_123741		AT5G43745	-	hypothetical protein	protein-coding
5190	4	16692211	16692396	+	0	NA	Intergenic	Intergenic	-1867	AT4G35070.1	829659	At.31449	NM_119673		AT4G35070	T12J5.5	SBP (S-ribonuclease binding protein) family protein	protein-coding
6491	5	22081673	22081822	+	0	NA	Intergenic	Intergenic	-1867	AT5G54380.1	835526	At.28202	NM_124818		THE1	GA469.3|GA469_3|THESEUS1	receptor-like protein kinase THESEUS 1	protein-coding
2002	2	1145776	1145927	+	0	NA	Intergenic	Intergenic	-1863	AT2G03740.1	814901	At.41376	NM_126421		AT2G03740	F19B11.19|F19B11_19	late embryogenesis abundant domain-containing protein	protein-coding
2951	2	19046619	19046752	+	0	NA	Intergenic	Intergenic	-1859	AT2G46400.1	819248	At.26510	NM_130204		WRKY46	ATWRKY46|F11C10.9|WRKY DNA-BINDING PROTEIN 46|WRKY DNA-binding protein 46	putative WRKY transcription factor 46	protein-coding
6917	5	26891017	26891178	+	0	NA	Intergenic	Intergenic	-1859	AT5G67390.1	836875	At.28813	NM_126139		AT5G67390	K8K14.12|K8K14_12	hypothetical protein	protein-coding
5183	4	16589336	16589412	+	0	NA	Intergenic	Intergenic	-1855	AT4G34770.1	829629	At.31473	NM_119643		AT4G34770	F11I11.10|F11I11_10	SAUR-like auxin-responsive protein	protein-coding
518	1	6620234	6620250	+	0	NA	Intergenic	Intergenic	-1852	AT1G19180.1	838501	At.22658	NM_101776		JAZ1	T29M8.5|T29M8_5|TIFY10A|jasmonate-zim-domain protein 1	jasmonate-zim-domain protein 1	protein-coding
1169	1	20670508	20670646	+	0	NA	Intergenic	Intergenic	-1851	AT1G55360.1	841982	At.21588	NM_104412		AT1G55360	F7A10.1|F7A10_1	hypothetical protein	protein-coding
761	1	9257686	9257827	+	0	NA	Intergenic	Intergenic	-1849	AT1G26770.1	839218	At.19919	NM_102440		EXPA10	ARABIDOPSIS THALIANA EXPANSIN 10|ARABIDOPSIS THALIANA EXPANSIN ALPHA 1.1|AT-EXP10|ATEXP10|ATEXPA10|ATHEXP ALPHA 1.1|EXP10|EXPANSIN 10|T24P13.15|T24P13_15|expansin A10	expansin A10	protein-coding
2285	2	10990880	10991054	+	0	NA	Intergenic	Intergenic	-1841	AT2G25770.1	817119	At.38976	NM_128137		AT2G25770	F17H15.20|F17H15_20	polyketide cyclase/dehydrase and lipid transport superfamily protein	protein-coding
1956	2	383319	383398	+	0	NA	Intergenic	Intergenic	-1841	AT2G01850.1	814716	At.21536	NM_126246		EXGT-A3	ATXTH27|T23K3.4|T23K3_4|XTH27|XYLOGLUCAN ENDOTRANSGLUCOSYLASE/HYDROLASE 27|endoxyloglucan transferase A3	endoxyloglucan transferase A3	protein-coding
1393	1	24876546	24876650	+	0	NA	Intergenic	HELITRONY3|RC|Helitron	-1840	AT1G66700.1	842988	At.26441	NM_105341		PXMT1	F4N21.16|F4N21_16	SABATH family methyltransferase PXMT1	protein-coding
1418	1	25177949	25178133	+	0	NA	Intergenic	Intergenic	-1839	AT1G67265.1	5007837	At.49512	NM_001084313		RTFL21	DEVIL 3|DVL3|ROTUNDIFOLIA like 21	ROTUNDIFOLIA like 21 protein	protein-coding
5956	5	7271267	7271398	+	0	NA	Intergenic	Intergenic	-1837	AT5G21990.1	832259	At.20053	NM_147882		AT5G21990	-	tetratricopeptide repeat domain-containing protein OEP61	protein-coding
4695	4	9944000	9944066	+	0	NA	Intergenic	Intergenic	-1837	AT4G17900.1	827514	At.2047	NM_117900		AT4G17900	T6K21.80|T6K21_80	PLATZ transcription factor family protein	protein-coding
5097	4	15417636	15417782	+	0	NA	Intergenic	Intergenic	-1836	AT4G31877.1	3770568				MIR156C	microRNA156C	ncRNA	ncRNA
3910	3	18478573	18478759	+	0	NA	Intergenic	Intergenic	-1832	AT3G49810.1	824143	At.43608	NM_114841		AT3G49810	-	U-box domain-containing protein 30	protein-coding
6533	5	22692953	22693143	+	0	NA	Intergenic	Intergenic	-1830	AT5G56040.2	835702	At.27847	NM_124986		AT5G56040	MDA7.8|MDA7_8	leucine-rich receptor-like protein kinase	protein-coding
4856	4	12297588	12297787	+	0	NA	Intergenic	Intergenic	-1828	AT4G23560.1	828456	At.5403	NM_118487		GH9B15	AtGH9B15|F9D16.30|F9D16_30|glycosyl hydrolase 9B15	glycosyl hydrolase 9B15	protein-coding
6905	5	26846951	26847075	+	0	NA	Intergenic	Intergenic	-1823	AT5G67280.1	836863	At.7938	NM_126128		RLK	K3G17.4|K3G17_4|receptor-like kinase	receptor-like kinase	protein-coding
4388	4	727974	728156	+	0	NA	Intergenic	Intergenic	-1822	AT4G01690.2	827991	At.19758	NM_116399		PPOX	HEMG1|PPO1|PROTOPORPHYRINOGEN OXIDASE	protoporphyrinogen oxidase	protein-coding
4575	4	8140901	8141082	+	0	NA	Intergenic	Intergenic	-1821	AT4G14135.1	7922504				AT4G14135	-	pseudo	pseudo
576	1	7270639	7270833	+	0	NA	Intergenic	Intergenic	-1820	AT1G20900.1	838683	At.11202	NM_101943		ESC	AHL27|AT-hook motif nuclear-localized protein 27|ESCAROLA|F9H16.12|F9H16_12|ORE7|ORESARA 7	putative DNA-binding protein ESCAROLA	protein-coding
5549	5	1518001	1518198	+	0	NA	Intergenic	Intergenic	-1814	AT5G05140.1	830396	At.21997	NM_120596		AT5G05140	MUG13.28	transcription elongation factor (TFIIS) family protein	protein-coding
4561	4	7862508	7862652	+	0	NA	Intergenic	Intergenic	-1814	AT4G13520.1	826984	At.28723	NM_117426		SMAP1	T6G15.70|T6G15_70|small acidic protein 1	small acidic protein 1	protein-coding
621	1	7694175	7694329	+	0	NA	Intergenic	Intergenic	-1814	AT1G21900.1	838792	At.41637	NM_102038		AT1G21900	T26F17.12|T26F17_12	p24 subfamily delta 5	protein-coding
432	1	5388049	5388232	+	0	NA	Intergenic	Intergenic	-1812	AT1G15670.1	838136	At.23684	NM_101435		AT1G15670	F7H2.1|F7H2_1	F-box protein KMD	protein-coding
117	1	1423513	1423689	+	0	NA	Intergenic	Intergenic	-1812	AT1G04990.1	839351	At.21743	NM_100378		AT1G04990	F13M7.1|F13M7_1	zinc finger CCCH domain-containing protein 3	protein-coding
6880	5	26606426	26606585	+	0	NA	Intergenic	Intergenic	-1811	AT5G66658.1	3771571	At.63377	NM_001037087		AT5G66658	-	hypothetical protein	protein-coding
3042	3	401515	401664	+	0	NA	Intergenic	Intergenic	-1810	AT3G02170.1	821279	At.23828	NM_111084		LNG2	F1C9.4|LONGIFOLIA2	longifolia2	protein-coding
5124	4	15817638	15817795	+	0	NA	Intergenic	Intergenic	-1808	AT4G32800.1	829416	At.31634	NM_119433		AT4G32800	T16I18.10|T16I18_10	ethylene-responsive transcription factor ERF043	protein-coding
3169	3	1994482	1994618	+	0	NA	Intergenic	Intergenic	-1806	AT3G06483.1	819826	At.10928	NM_111524		PDK	ATPDHK|PYRUVATE DEHYDROGENASE KINASE|pyruvate dehydrogenase kinase	pyruvate dehydrogenase kinase	protein-coding
6087	5	10296988	10297187	+	0	NA	Intergenic	Intergenic	-1804	AT5G28300.1	832914	At.19292	NM_122713		AT5G28300	T8M17.70|T8M17_70	trihelix transcription factor GTL2	protein-coding
4574	4	8140020	8140146	+	0	NA	Intergenic	Intergenic	-1802	AT4G14130.1	827051	At.25124	NM_117490		XTH15	DL3105C|FCAALL.173|XTR7|xyloglucan endotransglucosylase/hydrolase 15|xyloglucan endotransglycosylase 7	probable xyloglucan endotransglucosylase/hydrolase protein 15	protein-coding
701	1	8598569	8598762	+	0	NA	Intergenic	Intergenic	-1800	AT1G24265.2	839041	At.28438	NM_148486		AT1G24265	-	hypothetical protein	protein-coding
983	1	13203507	13203656	+	0	NA	Intergenic	Intergenic	-1800	AT1G35670.1	840471	At.24141	NM_103271		CDPK2	ATCDPK2|ATCPK11|CALCIUM-DEPENDENT PROTEIN KINASE 2|CPK11|F15O4.8|calcium-dependent protein kinase 2	calcium-dependent protein kinase 2	protein-coding
5827	5	5436402	5436583	+	0	NA	Intergenic	Intergenic	-1799	AT5G16600.1	831522	At.8851	NM_121666		MYB43	AtMYB43|MTG13.12|MTG13_12|myb domain protein 43	myb domain protein 43	protein-coding
550	1	6911349	6911515	+	0	NA	Intergenic	Intergenic	-1797	AT1G19910.1	838579	At.23589	NM_101846		AVA-P2	ATVHA-C2|AVA-2PE|F6F9.3|F6F9_3|VACUOLAR H+-PUMPING ATPASE 16 KDA PROTEOLIPID|VACUOLAR-TYPE H+ ATPASE C2	VACUOLAR-TYPE H+ ATPASE C2	protein-coding
1512	1	26242418	26242591	+	0	NA	Intergenic	Intergenic	-1796	AT1G69760.1	843312	At.46680	NM_105644		AT1G69760	T6C23.4|T6C23_4	hypothetical protein	protein-coding
5804	5	5074192	5074383	+	0	NA	Intergenic	Intergenic	-1795	AT5G15580.1	831411	At.24634	NM_121562		LNG1	LONGIFOLIA1|T20K14.190|T20K14_190	protein longifolia1	protein-coding
1250	1	22422034	22422198	+	0	NA	Intergenic	Intergenic	-1793	AT1G60900.1	842382	At.17780	NM_104771		AT1G60900	T7P1.5|T7P1_5	Splicing factor U2af large subunit B	protein-coding
811	1	9892713	9892860	+	0	NA	Intergenic	Intergenic	-1793	AT1G28290.1	839723	At.47585	NM_102594		AGP31	F3H9.6|F3H9_6|arabinogalactan protein 31	arabinogalactan protein 31	protein-coding
1010	1	17189512	17189685	+	0	NA	Intergenic	ATREP11|RC|Helitron	-1792	AT1G45688.1	841102	At.22272	NM_103600		AT1G45688	F2G19.25|F2G19_25	hypothetical protein	protein-coding
3781	3	11276699	11276896	+	0	NA	Intergenic	Intergenic	-1792	AT3G29370.1	822596	At.36929	NM_113862		AT3G29370	MUO10.6	atypical bHLH transcriptional factor P1R3	protein-coding
1022	1	17499810	17499993	+	0	NA	Intergenic	BRODYAGA1|DNA|MuDR	-1791	AT1G47603.1	3767386	At.63182	NM_001036076		PUP19	ATPUP19|purine permease 19	purine permease 19	protein-coding
5574	5	1915321	1915519	+	0	NA	Intergenic	Intergenic	-1791	AT5G06278.1	6240479				AT5G06278	-	pseudo	pseudo
1293	1	23290057	23290221	+	0	NA	Intergenic	Intergenic	-1790	AT1G62880.1	842589	At.70087	NM_104966		AT1G62880	F16P17.3|F16P17_3	protein cornichon-3	protein-coding
2968	2	19174254	19174418	+	0	NA	Intergenic	Intergenic	-1790	AT2G46685.1	3768747				MIR166A	MICRORNA 166|MIR166|microRNA166A	ncRNA	ncRNA
1198	1	21232218	21232298	+	0	NA	Intergenic	Intergenic	-1789	AT1G56640.1	3767472				AT1G56640	F25P12.24	pseudo	pseudo
6498	5	22150838	22151036	+	0	NA	Intergenic	HELITRONY3|RC|Helitron	-1788	AT5G54530.1	835541	At.29491	NM_124833		AT5G54530	MRB17.3|MRB17_3	hypothetical protein	protein-coding
4142	3	21287654	21287804	+	0	NA	Intergenic	Intergenic	-1788	AT3G57510.1	824918	At.26895	NM_115611		ADPG1	-	polygalacturonase ADPG1	protein-coding
267	1	3482714	3482836	+	0	NA	Intergenic	Intergenic	-1787	AT1G10550.1	837596	At.42175	NM_100930		XTH33	T10O24.17|T10O24_17|XET|XYLOGLUCAN ENDOTRANSGLYCOSYLASE|XYLOGLUCAN:XYLOGLUCOSYL TRANSFERASE 33|xyloglucan:xyloglucosyl transferase 33	probable xyloglucan endotransglucosylase/hydrolase protein 33	protein-coding
4316	3	23287523	23287704	+	0	NA	Intergenic	Intergenic	-1787	AT3G63006.1	3769775				AT3G63006	67324.TRNA-ALA-2	tRNA	tRNA
4821	4	11973084	11973225	+	0	NA	Intergenic	Intergenic	-1787	AT4G22785.1	3769907				AT4G22785	67142.TRNA-LYS-2	tRNA	tRNA
3622	3	8184203	8184384	+	0	NA	Intergenic	Intergenic	-1787	AT3G23040.1	821878	At.53447	NM_113204		AT3G23040	-	hypothetical protein	protein-coding
6896	5	26770845	26771033	+	0	NA	Intergenic	Intergenic	-1787	AT5G67080.1	836843	At.49431	NM_126108		MAPKKK19	K21H1.4|K21H1_4|mitogen-activated protein kinase kinase kinase 19	mitogen-activated protein kinase kinase kinase 19	protein-coding
5260	4	17386934	17387129	+	0	NA	Intergenic	Intergenic	-1783	AT4G36900.1	829843	At.461	NM_119854		RAP2.10	AP22.2|AP22_2|DEAR4|DREB AND EAR MOTIF PROTEIN 4|related to AP2 10	ethylene-responsive transcription factor RAP2-10	protein-coding
3420	3	5241665	5241792	+	0	NA	Intergenic	Intergenic	-1782	AT3G15510.1	820790	At.10489	NM_112419		NAC2	ANAC056|ATNAC2|Arabidopsis NAC domain containing protein 56|NAC domain containing protein 2|NAC-REGULATED SEED MORPHOLOGY 1|NARS1	NAC domain containing protein 2	protein-coding
6120	5	15254413	15254575	+	0	NA	Intergenic	Intergenic	-1782	AT5G38200.1	833802	At.26663	NM_123181		AT5G38200	MXA21.22	class I glutamine amidotransferase-like protein	protein-coding
5080	4	15227905	15228103	+	0	NA	Intergenic	Intergenic	-1781	AT4G31380.1	829265	At.51243	NM_119287		FLP1	F3L17.1|FPF1-like protein 1	flowering-promoting factor 1-like protein 1	protein-coding
1574	1	26684911	26685060	+	0	NA	Intergenic	Intergenic	-1781	AT1G70750.1	843412	At.10957	NM_105743		AT1G70750	-	hypothetical protein	protein-coding
1645	1	27306684	27306786	+	0	NA	Intergenic	Intergenic	-1780	AT1G72520.1	843584	At.18241	NM_105911		AT1G72520	T10D10.1|T10D10_1	lipoxygenase 4	protein-coding
1023	1	17631990	17632106	+	0	NA	Intergenic	Intergenic	-1778	AT1G47860.1	3767393				AT1G47860	T2E6.4|T2E6_4	pseudo	pseudo
2794	2	17585546	17585719	+	0	NA	Intergenic	Intergenic	-1775	AT2G42200.1	818820	At.498	NM_129782		SPL9	T24P15.11|T24P15_11|squamosa promoter binding protein-like 9	squamosa promoter-binding-like protein 9	protein-coding
4888	4	12522627	12522809	+	0	NA	Intergenic	Intergenic	-1773	AT4G24120.1	828512	At.3668	NM_118544		YSL1	ATYSL1|T19F6.110|T19F6_110|YELLOW STRIPE LIKE 1|YELLOW STRIPE like 1	metal-nicotianamine transporter YSL1	protein-coding
6745	5	25267459	25267564	+	0	NA	Intergenic	Intergenic	-1771	AT5G62960.1	836416	At.29024	NM_125690		AT5G62960	MJH22.1|MJH22_1	hypothetical protein	protein-coding
4647	4	9447272	9447420	+	0	NA	Intergenic	Intergenic	-1768	AT4G16780.1	827384	At.24419	NM_117780		HB-2	ARABIDOPSIS THALIANA HOMEOBOX PROTEIN 2|ATHB-2|ATHB2|DL4415W|FCAALL.101|HAT4|homeobox protein 2	homeobox protein 2	protein-coding
4434	4	1304640	1304833	+	0	NA	Intergenic	Intergenic	-1767	AT4G02940.1	828132	At.20270	NM_116528		AT4G02940	T4I9.18|T4I9_18	oxidoreductase, 2OG-Fe(II) oxygenase family protein	protein-coding
6471	5	21820622	21820818	+	0	NA	Intergenic	Intergenic	-1766	AT5G53760.1	835457	At.6980	NM_124755		MLO11	ATMLO11|MGN6.12|MGN6_12|MILDEW RESISTANCE LOCUS O 11	MLO-like protein 11	protein-coding
5268	4	17412272	17412453	+	0	NA	Intergenic	Intergenic	-1765	AT4G36930.1	829847	At.4639	NM_119857		SPT	AP22.25|AP22_25|SPATULA	transcription factor SPATULA	protein-coding
6078	5	9850825	9850976	+	0	NA	Intergenic	Intergenic	-1764	AT5G27807.1	3770751				MIR164C	EARLY EXTRA PETALS 1|EEP1|MICRORNA 164|MIR164|microRNA164C	miscRNA	miscRNA
4712	4	10167225	10167424	+	0	NA	Intergenic	Intergenic	-1762	AT4G18390.1	827568	At.1934	NM_117950		TCP2	F28J12.50|F28J12_50|TEOSINTE BRANCHED 1|cycloidea and PCF transcription factor 2	transcription factor TCP2	protein-coding
1751	1	28385459	28385597	+	0	NA	Intergenic	Intergenic	-1760	AT1G75590.1	843894	At.34755	NM_106211		AT1G75590	F10A5.20|F10A5_20	SAUR-like auxin-responsive protein	protein-coding
5021	4	14442979	14443140	+	0	NA	Intergenic	Intergenic	-1760	AT4G29330.1	829054	At.27188	NM_119078		DER1	DERLIN-1|F17A13.150|F17A13_150	derlin-1	protein-coding
3195	3	2345148	2345310	+	0	NA	Intergenic	Intergenic	-1759	AT3G07340.1	819922	At.40357	NM_111613		AT3G07340	-	transcription factor bHLH62	protein-coding
414	1	5195864	5196059	+	0	NA	Intergenic	Intergenic	-1758	AT1G15100.1	838073	At.10851	NM_101378		RHA2A	RING-H2 FINGER PROTEIN RHA2A|RING-H2 finger A2A	E3 ubiquitin-protein ligase RHA2A	protein-coding
5471	5	521456	521564	+	0	NA	Intergenic	Intergenic	-1754	AT5G02410.1	831764	At.33423	NM_120319		AT5G02410	T1E22.170|T1E22_170	alpha-1,2-glucosyltransferase	protein-coding
5398	4	18460837	18461027	+	0	NA	Intergenic	Intergenic	-1752	AT4G39780.1	830136	At.2297	NM_120141		AT4G39780	T19P19.170|T19P19_170	ethylene-responsive transcription factor ERF060	protein-coding
5176	4	16551556	16551723	+	0	NA	Intergenic	Intergenic	-1751	AT4G34680.2	829620	At.24640	NM_119634		GATA3	GATA transcription factor 3|T4L20.260|T4L20_260	GATA transcription factor 3	protein-coding
6665	5	24384386	24384403	+	0	NA	Intergenic	Intergenic	-1751	AT5G60680.1	836189	At.7237	NM_125461		AT5G60680	MUP24.10|MUP24_10	hypothetical protein	protein-coding
4735	4	10509827	10509916	+	0	NA	Intergenic	ATREP10D|RC|Helitron	-1750	AT4G19220.1	827662	At.65402	NM_118042		AT4G19220	T18B16.190|T18B16_190	pentatricopeptide repeat-containing protein	protein-coding
1032	1	18028859	18029050	+	0	NA	Intergenic	Intergenic	-1750	AT1G48745.1	5007786	At.64865	NM_001084220		AT1G48745	-	hypothetical protein	protein-coding
6831	5	26248051	26248206	+	0	NA	Intergenic	Intergenic	-1749	AT5G65660.1	836692	At.28896	NM_125964		AT5G65660	K21L13.18|K21L13_18	hydroxyproline-rich glycoprotein family protein	protein-coding
1626	1	27160993	27161150	+	0	NA	Intergenic	Intergenic	-1749	AT1G72180.1	843550	At.28051	NM_105877		AT1G72180	T9N14.3|T9N14_3	leucine-rich receptor-like protein kinase	protein-coding
3495	3	6272176	6272322	+	0	NA	Intergenic	Intergenic	-1746	AT3G18290.1	821357	At.43728	NM_112713		BTS	BRUTUS|EMB2454|embryo defective 2454	putative E3 ligase BRUTUS	protein-coding
3818	3	16519171	16519364	+	0	NA	Intergenic	ATREP3|RC|Helitron	-1745	AT3G45130.1	823649	At.36069	NM_114382		LAS1	lanosterol synthase 1	lanosterol synthase 1	protein-coding
2774	2	17465820	17465990	+	0	NA	Intergenic	Intergenic	-1744	AT2G41850.1	818785	At.42781	NM_180028		PGAZAT	ADPG2|ARABIDOPSIS DEHISCENCE ZONE POLYGALACTURONASE 2|T11A7.5|T11A7_5|polygalacturonase abscission zone A. thaliana	polygalacturonase ADPG2	protein-coding
6724	5	25035636	25035733	+	0	NA	Intergenic	Intergenic	-1742	AT5G62350.1	836356	At.8941	NM_125629		AT5G62350	MMI9.21|MMI9_21	plant invertase/pectin methylesterase inhibitor superfamily protein	protein-coding
3703	3	9465995	9466056	+	0	NA	Intergenic	Intergenic	-1742	AT3G25870.1	822182	At.43505	NM_113490		AT3G25870	-	hypothetical protein	protein-coding
1170	1	20762172	20762372	+	0	NA	Intergenic	Intergenic	-1739	AT1G55580.1	842007	At.45199	NM_104434		LAS	F20N2.1|Lateral Suppressor|SCARECROW-LIKE 18|SCL18	GRAS family transcription factor	protein-coding
5293	4	17588938	17589133	+	0	NA	Intergenic	Intergenic	-1737	AT4G37410.1	829895	At.22792	NM_119904		CYP81F4	F6G17.60|F6G17_60|cytochrome P450|family 81|polypeptide 4|subfamily F	cytochrome P450, family 81, subfamily F, polypeptide 4	protein-coding
3300	3	4035246	4035422	+	0	NA	Intergenic	Intergenic	-1736	AT3G12700.2	820452	At.28194	NM_112106		AT3G12700	-	aspartyl protease family protein	protein-coding
4108	3	20913705	20913824	+	0	NA	Intergenic	Intergenic	-1733	AT3G56408.1	6241055				AT3G56408	-	ncRNA	ncRNA
6561	5	23059378	23059569	+	0	NA	Intergenic	Intergenic	-1731	AT5G56980.1	835800	At.7095	NM_125080		AT5G56980	MHM17.10|MHM17_10	hypothetical protein	protein-coding
2547	2	14780508	14780695	+	0	NA	Intergenic	Intergenic	-1731	AT2G35060.1	818071	At.37715	NM_129058		KUP11	F19I3.29|F19I3_29|K+ uptake permease 11	potassium transporter 11	protein-coding
582	1	7322766	7322948	+	0	NA	Intergenic	Intergenic	-1731	AT1G20980.1	838692	At.21192	NM_101951		SPL14	ATSPL14|F9H16.3|F9H16_3|FBR6|SPL1R2|SQUAMOSA PROMOTER BINDING PROTEIN-LIKE 14|squamosa promoter binding protein-like 14	squamosa promoter binding-like protein 14	protein-coding
3611	3	8106194	8106388	+	0	NA	Intergenic	Intergenic	-1730	AT3G22886.1	3768900				MIR167A	microRNA167A	ncRNA	ncRNA
5254	4	17363615	17363801	+	0	NA	Intergenic	Intergenic	-1730	AT4G36860.1	829839	At.43898	NM_119850		AT4G36860	AP22.33|AP22_33	LIM domain-containing protein	protein-coding
4345	4	189303	189399	+	0	NA	Intergenic	Intergenic	-1724	AT4G00430.2	827956	At.20518	NM_116268		PIP1;4	A_IG005I10.2|A_IG005I10_2|F5I10.2|F5I10_2|PIP1E|PLASMA MEMBRANE INTRINSIC PROTEIN 1E|TMP-C|TRANSMEMBRANE PROTEIN C|plasma membrane intrinsic protein 1;4	plasma membrane intrinsic protein 1;4	protein-coding
1014	1	17268364	17268558	+	0	NA	Intergenic	Intergenic	-1724	AT1G46840.1	841118	At.52044	NM_103608		AT1G46840	F2G19.29|F2G19_29	F-box protein	protein-coding
1159	1	20523893	20524078	+	0	NA	Intergenic	Intergenic	-1723	AT1G55020.1	841944	At.19984	NM_104376		LOX1	ARABIDOPSIS LIPOXYGENASE 1|ATLOX1|LIPOXYGENASE|lipoxygenase 1	lipoxygenase 1	protein-coding
2975	2	19227540	19227607	+	0	NA	Intergenic	Intergenic	-1720	AT2G46780.1	819291	At.22279	NM_130244		AT2G46780	F19D11.6	RNA-binding (RRM/RBD/RNP motifs) family protein	protein-coding
3932	3	18731263	18731438	+	0	NA	Intergenic	Intergenic	-1718	AT3G50480.1	824212	At.66512	NM_114908		HR4	homolog of RPW8 4	RPW8-like protein 4	protein-coding
4116	3	21058115	21058282	+	0	NA	Intergenic	Intergenic	-1717	AT3G56880.1	824855	At.23094	NM_115547		AT3G56880	-	VQ motif-containing protein	protein-coding
3315	3	4126598	4126782	+	0	NA	Intergenic	Intergenic	-1717	AT3G12930.1	820478	At.11983	NM_112129		AT3G12930	-	Lojap-related protein	protein-coding
3641	3	8406307	8406491	+	0	NA	Intergenic	Intergenic	-1715	AT3G23440.1	821925	At.65136	NM_113247		EDA6	EMBRYO SAC DEVELOPMENT ARREST 6|MATERNAL EFFECT EMBRYO ARREST 37|MEE37	protein EMBRYO SAC DEVELOPMENT ARREST 6	protein-coding
4037	3	19992757	19992937	+	0	NA	Intergenic	Intergenic	-1713	AT3G53990.1	824566	At.23225	NM_115259		AT3G53990	-	Adenine nucleotide alpha hydrolases-like superfamily protein	protein-coding
830	1	10145904	10146076	+	0	NA	Intergenic	Intergenic	-1703	AT1G29060.1	839780	At.40818	NM_102647		AT1G29060	F28N24.23|F28N24_23	Bet1-like protein	protein-coding
3481	3	5963811	5963954	+	0	NA	Intergenic	Intergenic	-1703	AT3G17420.1	821006	At.27574	NM_112621		GPK1	glyoxysomal protein kinase 1	glyoxysomal protein kinase 1	protein-coding
3265	3	3652956	3653114	+	0	NA	Intergenic	Intergenic	-1703	AT3G11580.1	820331	At.39724	NM_111991		AT3G11580	-	AP2/B3-like transcriptional factor family protein	protein-coding
5496	5	828670	828819	+	0	NA	Intergenic	Intergenic	-1701	AT5G03370.1	831859	At.33284	NM_120416		AT5G03370	F12E4.110|F12E4_110	acylphosphatase family protein	protein-coding
2956	2	19094927	19095100	+	0	NA	Intergenic	Intergenic	-1698	AT2G46510.1	819262	At.19872	NM_130216		AIB	ABA-inducible BHLH-type transcription factor|ATAIB|F11C10.32	transcription factor ABA-INDUCIBLE bHLH-TYPE	protein-coding
2230	2	9907521	9907714	+	0	NA	Intergenic	Intergenic	-1697	AT2G23290.1	816861	At.28681	NM_127893		MYB70	AtMYB70|T20D16.8|T20D16_8|myb domain protein 70	myb domain protein 70	protein-coding
1329	1	23921942	23922130	+	0	NA	Intergenic	Intergenic	-1696	AT1G64405.1	842749	At.36005	NM_105116		AT1G64405	-	hypothetical protein	protein-coding
5562	5	1708395	1708571	+	0	NA	Intergenic	Intergenic	-1696	AT5G05690.2	830453	At.20458	NM_120651		CPD	CABBAGE 3|CBB3|CONSTITUTIVE PHOTOMORPHOGENIC DWARF|CYP90|CYP90A|CYP90A1|CYTOCHROME P450|CYTOCHROME P450 90A1|CYTOCHROME P450 MONOOXYGENASE|DWARF 3|DWF3|MJJ3.9|MJJ3_9	cytochrome P450 90A1	protein-coding
1102	1	19635042	19635225	+	0	NA	Intergenic	HELITRONY3|RC|Helitron	-1693	AT1G52700.1	841703	At.23942	NM_104148		AT1G52700	F6D8.5|F6D8_5	alpha/beta-Hydrolases superfamily protein	protein-coding
5095	4	15396029	15396218	+	0	NA	Intergenic	Intergenic	-1693	AT4G31820.1	829311	At.43160	NM_119332		ENP	ENHANCER OF PINOID|F11C18.20|F11C18_20|MAB4|MACCHI-BOU 4|NAKED PINS IN YUC MUTANTS 1|NPY1	BTB/POZ domain-containing protein NPY1	protein-coding
1268	1	22822673	22822825	+	0	NA	Intergenic	Intergenic	-1691	AT1G61800.1	842477	At.10733	NM_104862		GPT2	ARABIDOPSIS GLUCOSE-6-PHOSPHATE/PHOSPHATE TRANSLOCATOR 2|ATGPT2|GLUCOSE6-PHOSPHATE/PHOSPHATE TRANSPORTER 2|T13M11.18|T13M11_18|glucose-6-phosphate/phosphate translocator 2	glucose-6-phosphate/phosphate translocator 2	protein-coding
390	1	5071320	5071508	+	0	NA	Intergenic	Intergenic	-1691	AT1G14730.1	838038	At.41956	NM_101342		AT1G14730	F10B6.13|F10B6_13	probable transmembrane ascorbate ferrireductase 3	protein-coding
6645	5	24067760	24067960	+	0	NA	Intergenic	Intergenic	-1690	AT5G59730.2	836094	At.7314	NM_125365		EXO70H7	ATEXO70H7|MTH12.6|MTH12_6|exocyst subunit exo70 family protein H7	exocyst subunit exo70 family protein H7	protein-coding
3638	3	8381022	8381211	+	0	NA	Intergenic	Intergenic	-1689	AT3G23410.1	821922	At.28715	NM_113244		FAO3	ARABIDOPSIS FATTY ALCOHOL OXIDASE 3|ATFAO3|fatty alcohol oxidase 3	long-chain-alcohol oxidase FAO3	protein-coding
4937	4	13195467	13195648	+	0	NA	Intergenic	Intergenic	-1689	AT4G26000.1	828706	At.23137	NM_118733		PEP	F20B18.110|F20B18_110|PEPPER	RNA-binding KH domain-containing protein PEPPER	protein-coding
6705	5	24904715	24904896	+	0	NA	Intergenic	Intergenic	-1688	AT5G61990.1	836320	At.9377	NM_125592		AT5G61990	MTG10.2|MTG10_2	pentatricopeptide repeat-containing protein	protein-coding
2357	2	12022367	12022558	+	0	NA	Intergenic	Intergenic	-1687	AT2G28200.1	817366	At.39	NM_128380		AT2G28200	T3B23.13|T3B23_13	zinc finger protein ZAT5	protein-coding
5613	5	2614575	2614753	+	0	NA	Intergenic	Intergenic	-1681	AT5G08139.1	830709	At.5451	NM_180459		AT5G08139	-	RING/U-box domain-containing protein	protein-coding
832	1	10166031	10166231	+	0	NA	Intergenic	Intergenic	-1679	AT1G29090.1	839784	At.40814	NM_102650		AT1G29090	F28N24.20|F28N24_20	Cysteine proteinases superfamily protein	protein-coding
2141	2	8657298	8657433	+	0	NA	Intergenic	Intergenic	-1678	AT2G20060.1	816525	At.39751	NM_127564		AT2G20060	T2G17.14|T2G17_14	large subunit ribosomal protein L4	protein-coding
3114	3	1464557	1464674	+	0	NA	Intergenic	Intergenic	-1673	AT3G05165.5	819680	At.20337	NM_111389		AT3G05165	-	Major facilitator superfamily protein	protein-coding
622	1	7694796	7694936	+	0	NA	Intergenic	Intergenic	-1670	AT1G21910.1	838793	At.41636	NM_102039		AT1G21910	T26F17.14|T26F17_14	ethylene-responsive transcription factor ERF012	protein-coding
6647	5	24085004	24085197	+	0	NA	Intergenic	Intergenic	-1669	AT5G59780.1	836099	At.22428	NM_125370		MYB59	ATMYB59|ATMYB59-1|ATMYB59-2|ATMYB59-3|MTH12.19|MTH12_19|MYB DOMAIN PROTEIN 59|myb domain protein 59	transcription factor MYB59	protein-coding
5527	5	1268984	1269181	+	0	NA	Intergenic	Intergenic	-1666	AT5G04470.1	830326	At.25536	NM_120529		SIM	SIAMESE|T19N18.8	cyclin-dependent protein kinase inhibitor	protein-coding
1713	1	28084220	28084394	+	0	NA	Intergenic	Intergenic	-1663	AT1G74740.1	843813	At.45891	NM_106132		CPK30	ATCPK30|CALCIUM-DEPENDENT PROTEIN KINASE 1A|CDPK1A|F25A4.29|F25A4_29|calcium-dependent protein kinase 30	calcium-dependent protein kinase 30	protein-coding
2999	2	19491307	19491357	+	0	NA	Intergenic	Intergenic	-1663	AT2G47500.1	819363	At.46711	NM_180144		AT2G47500	T30B22.20	P-loop nucleoside triphosphate hydrolases superfamily protein with CH (Calponin Homology) domain	protein-coding
4568	4	8051714	8051822	+	0	NA	Intergenic	Intergenic	-1662	AT4G13930.1	827027	At.23373	NM_117467		SHM4	DL3005C|FCAALL.160|SERINE HYDROXYMETHYLTRANSFERASE 4|serine hydroxymethyltransferase 4	serine hydroxymethyltransferase 4	protein-coding
1643	1	27292609	27292796	+	0	NA	Intergenic	Intergenic	-1660	AT1G72490.1	843581	At.50961	NM_105908		AT1G72490	T10D10.4|T10D10_4	hypothetical protein	protein-coding
1098	1	19432802	19432902	+	0	NA	Intergenic	Intergenic	-1657	AT1G52190.1	841649	At.25542	NM_104099		AT1G52190	F9I5.4|F9I5_4	nitrate transporter 1.11	protein-coding
4593	4	8486458	8486502	+	0	NA	Intergenic	Intergenic	-1655	AT4G14770.1	827132	At.23380	NM_117562		TCX2	ATTCX2|DL3425C|FCAALL.306|TESMIN/TSO1-LIKE CXC 2|TESMIN/TSO1-like CXC 2	TESMIN/TSO1-like CXC 2	protein-coding
5797	5	4972919	4973117	+	0	NA	Intergenic	Intergenic	-1653	AT5G15310.2	831383	At.5394	NM_121535		MYB16	ATMIXTA|ATMYB16|F8M21.200|F8M21_200|myb domain protein 16	myb domain protein 16	protein-coding
6016	5	8529268	8529385	+	0	NA	Intergenic	Intergenic	-1652	AT5G24830.1	832552	At.45620	NM_122392		AT5G24830	F6A4.40|F6A4_40	pentatricopeptide repeat-containing protein	protein-coding
2313	2	11363358	11363539	+	0	NA	Intergenic	Intergenic	-1650	AT2G26695.1	2745562	At.64947	NM_201808		AT2G26695	-	Ran BP2/NZF zinc finger-like protein	protein-coding
3950	3	18824305	18824477	+	0	NA	Intergenic	Intergenic	-1649	AT3G50665.1	3769697				AT3G50665	67272.TRNA-GLU-1	tRNA	tRNA
2712	2	16770330	16770521	+	0	NA	Intergenic	Intergenic	-1648	AT2G40140.1	818605	At.27663	NM_129572		CZF1	(SALT-INDUCIBLE ZINC FINGER 2|ATSZF2|SZF2|T7M7.3|T7M7_3|ZFAR1	zinc finger CCCH domain-containing protein 29	protein-coding
5280	4	17522729	17522902	+	0	NA	Intergenic	Intergenic	-1646	AT4G37240.1	829878	At.43110	NM_119887		AT4G37240	AP22.53|AP22_53	hypothetical protein	protein-coding
3806	3	15991646	15991820	+	0	NA	Intergenic	Intergenic	-1646	AT3G44320.1	823557	At.242	NM_114300		NIT3	AtNIT3|NITRILASE 3|nitrilase 3	nitrilase 3	protein-coding
1549	1	26476333	26476528	+	0	NA	Intergenic	Intergenic	-1644	AT1G70290.1	843365	At.27738	NM_105697		TPS8	ATTPS8|ATTPSC|F17O7.18|F17O7_18|trehalose-6-phosphatase synthase S8	putative alpha,alpha-trehalose-phosphate synthase [UDP-forming] 8	protein-coding
1934	2	177953	178146	+	0	NA	Intergenic	Intergenic	-1642	AT2G01410.1	814669	At.32408	NM_126202		AT2G01410	F10A8.30	hypothetical protein	protein-coding
6351	5	20018323	20018439	+	0	NA	Intergenic	Intergenic	-1639	AT5G49360.1	834996	At.22961	NM_124313		BXL1	ATBXL1|BETA-XYLOSIDASE 1|K7J8.3|K7J8_3|beta-xylosidase 1	bifunctional {beta}-D-xylosidase/{alpha}-L-arabinofuranosidase	protein-coding
3743	3	10203581	10203766	+	0	NA	Intergenic	Intergenic	-1635	AT3G27540.1	822376	At.37037	NM_113670		AT3G27540	-	beta-1,4-N-acetylglucosaminyltransferase family protein	protein-coding
6675	5	24478735	24478907	+	0	NA	Intergenic	Intergenic	-1628	AT5G60850.1	836206	At.20219	NM_125478		OBP4	MAE1.2|MAE1_2|OBF binding protein 4|ZINC FINGER PROTEIN OBP4	OBF binding protein 4	protein-coding
1209	1	21444455	21444638	+	0	NA	Intergenic	Intergenic	-1626	AT1G57990.1	842166	At.20872	NM_104584		PUP18	ATPUP18|F13D13.3|purine permease 18	purine permease 18	protein-coding
2215	2	9784672	9784708	+	0	NA	Intergenic	Intergenic	-1626	AT2G22990.1	816830	At.24365	NM_127864		SNG1	MALATE SINAPOYLTRANSFERASE|SCPL8|SERINE CARBOXYPEPTIDASE-LIKE 8|T20K9.18|sinapoylglucose 1	sinapoylglucose:malate sinapoyltransferase	protein-coding
2914	2	18735658	18735846	+	0	NA	Intergenic	Intergenic	-1625	AT2G45450.1	819153	At.36630	NM_130107		ZPR1	F4L23.4|LITTLE ZIPPER 1	little zipper 1 protein	protein-coding
2996	2	19468026	19468163	+	0	NA	Intergenic	Intergenic	-1625	AT2G47440.1	819357	At.26830	NM_130312		AT2G47440	T30B22.26	tetratricopeptide repeat-containing protein	protein-coding
3750	3	10313416	10313564	+	0	NA	Intergenic	Intergenic	-1624	AT3G27820.1	822402	At.5731	NM_113698		MDAR4	ATMDAR4|MONODEHYDROASCORBATE REDUCTASE 4|monodehydroascorbate reductase 4	monodehydroascorbate reductase (NADH)	protein-coding
5710	5	3865283	3865470	+	0	NA	Intergenic	Intergenic	-1621	AT5G11970.1	831070	At.28372	NM_121235		AT5G11970	F14F18.140|F14F18_140	hypothetical protein	protein-coding
6448	5	21666222	21666414	+	0	NA	Intergenic	Intergenic	-1621	AT5G53410.1	835422	At.55523	NM_124720		AT5G53410	MYN8.2|MYN8_2	hypothetical protein	protein-coding
1581	1	26741339	26741531	+	0	NA	Intergenic	Intergenic	-1619	AT1G70940.1	843432	At.11573	NM_105762		PIN3	ARABIDOPSIS PIN-FORMED 3|ATPIN3|F15H11.14|F15H11_14|PIN-FORMED 3	auxin efflux carrier component 3	protein-coding
5090	4	15293081	15293231	+	0	NA	Intergenic	Intergenic	-1617	AT4G31550.2	829282	At.24683	NM_119304		WRKY11	ATWRKY11|F3L17.120|F3L17_120|WRKY DNA-binding protein 11	putative WRKY transcription factor 11	protein-coding
5969	5	7468776	7468887	+	0	NA	Intergenic	Intergenic	-1612	AT5G22500.1	832311	At.21452	NM_122155		FAR1	MQJ16.4|MQJ16_4|fatty acid reductase 1	fatty acyl-CoA reductase 1	protein-coding
5665	5	3384206	3384376	+	0	NA	Intergenic	Intergenic	-1610	AT5G10720.1	830938	At.19135	NM_121110		HK5	AHK5|CKI2|CYTOKININ INDEPENDENT 2|MAJ23.80|MAJ23_80|histidine kinase 5	histidine kinase 5	protein-coding
6234	5	17808775	17808962	+	0	NA	Intergenic	Intergenic	-1609	AT5G44220.1	834445	At.55348	NM_123789		AT5G44220	MLN1.15|MLN1_15	putative F-box protein	protein-coding
1954	2	379955	380154	+	0	NA	Intergenic	Intergenic	-1607	AT2G01840.1	3768258				AT2G01840	T23K3.3|T23K3_3	pseudo	pseudo
4194	3	22214974	22215159	+	0	NA	Intergenic	ATREP10D|RC|Helitron	-1606	AT3G60140.1	825184	At.1182	NM_115877		DIN2	BETA GLUCOSIDASE 30|BGLU30|DARK INDUCIBLE 2|SENESCENCE-RELATED GENE 2|SRG2	beta-glucosidase 30	protein-coding
4229	3	22427834	22427952	+	0	NA	Intergenic	Intergenic	-1605	AT3G60670.1	825238	At.50297	NM_115931		AT3G60670	-	PLATZ transcription factor family protein	protein-coding
5034	4	14655388	14655501	+	0	NA	Intergenic	Intergenic	-1601	AT4G29950.1	829118	At.20316	NM_119141		AT4G29950	-	RabGAP/TBC domain-containing protein	protein-coding
5346	4	17997754	17997910	+	0	NA	Intergenic	Intergenic	-1600	AT4G38470.1	830003	At.22724	NM_120008		AT4G38470	F20M13.30|F20M13_30	ACT-like protein tyrosine kinase family protein	protein-coding
1318	1	23819825	23820009	+	0	NA	Intergenic	Intergenic	-1599	AT1G64180.1	842722	At.26404	NM_105091		AT1G64180	F22C12.6|F22C12_6	intracellular protein transport protein USO1-like protein	protein-coding
1241	1	22184650	22184829	+	0	NA	Intergenic	Intergenic	-1596	AT1G60150.1	3767577				AT1G60150	T13D8.37	pseudo	pseudo
3596	3	7911236	7911388	+	0	NA	Intergenic	Intergenic	-1593	AT3G22380.1	821807	At.21572	NM_113136		TIC	TIME FOR COFFEE	clock regulator protein TIME FOR COFFEE	protein-coding
4744	4	10650088	10650220	+	0	NA	Intergenic	Intergenic	-1590	AT4G19530.1	827695	At.32809	NM_118073		AT4G19530	F24J7.90|F24J7_90	TIR-NBS-LRR class disease resistance protein	protein-coding
4360	4	475300	475463	+	0	NA	Intergenic	Intergenic	-1589	AT4G01090.1	827898	At.28429	NM_116339		AT4G01090	F2N1.13|F2N1_13	hypothetical protein	protein-coding
5734	5	4194921	4195046	+	0	NA	Intergenic	Intergenic	-1589	AT5G13180.1	831157	At.10079	NM_121321		NAC083	ANAC083|NAC domain containing protein 83|T19L5.140|T19L5_140|VND-interacting 2|VNI2	NAC domain containing protein 83	protein-coding
303	1	4082485	4082665	+	0	NA	Intergenic	HELITRONY1D|RC|Helitron	-1587	AT1G12080.2	837760	At.43537	NM_101080		AT1G12080	F12F1.4|F12F1_4	vacuolar calcium-binding protein-like protein	protein-coding
4021	3	19700758	19700920	+	0	NA	Intergenic	Intergenic	-1580	AT3G53150.1	824481	At.65277	NM_115175		UGT73D1	UDP-glucosyl transferase 73D1	UDP-glucosyl transferase 73D1	protein-coding
1596	1	26801824	26801980	+	0	NA	Intergenic	Intergenic	-1580	AT1G71040.1	843444	At.17817	NM_105773		LPR2	F23N20.3|F23N20_3|Low Phosphate Root2	protein LOW PHOSPHATE ROOT2	protein-coding
5086	4	15288830	15288940	+	0	NA	Intergenic	Intergenic	-1579	AT4G31540.1	829281	At.31736	NM_119303		EXO70G1	ATEXO70G1|F3L17.110|F3L17_110|exocyst subunit exo70 family protein G1	exocyst subunit exo70 family protein G1	protein-coding
1693	1	27859445	27859630	+	0	NA	Intergenic	Intergenic	-1579	AT1G74088.2	5007847	At.47663	NM_001198466		AT1G74088	-	hypothetical protein	protein-coding
2139	2	8579704	8579862	+	0	NA	Intergenic	Intergenic	-1575	AT2G19880.1	816507	At.26304	NM_127546		AT2G19880	F6F22.9|F6F22_9	nucleotide-diphospho-sugar transferases superfamily protein	protein-coding
4007	3	19449001	19449149	+	0	NA	Intergenic	Intergenic	-1574	AT3G52470.1	824412	At.20394	NM_115107		AT3G52470	-	late embryogenesis abundant hydroxyproline-rich glycoprotein	protein-coding
3963	3	18884494	18884651	+	0	NA	Intergenic	Intergenic	-1573	AT3G50800.1	824244	At.35454	NM_114940		AT3G50800	-	hypothetical protein	protein-coding
4923	4	13071165	13071338	+	0	NA	Intergenic	Intergenic	-1572	AT4G25620.1	828667	At.32244	NM_118694		AT4G25620	M7J2.10|M7J2_10	hydroxyproline-rich glycoprotein family protein	protein-coding
913	1	11573660	11573840	+	0	NA	Intergenic	Intergenic	-1570	AT1G32170.1	840109	At.10186	NM_102950		XTH30	F3C3.5|F3C3_5|XTR4|XYLOGLUCAN ENDOTRANSGLYCOSYLASE-RELATED PROTEIN|xyloglucan endotransglucosylase/hydrolase 30|xyloglucan endotransglycosylase 4	probable xyloglucan endotransglucosylase/hydrolase 30	protein-coding
4146	3	21305062	21305246	+	0	NA	Intergenic	ATREP5|RC|Helitron	-1569	AT3G57550.1	824922	At.717	NM_115615		AGK2	GK-2|GUANYLATE KINAS|GUANYLATE KINAS 2|guanylate kinase	guanylate kinase	protein-coding
2872	2	18444887	18445049	+	0	NA	Intergenic	Intergenic	-1569	AT2G44740.1	819082	At.23538	NM_130038		CYCP4;1	F16B22.23|cyclin p4;1	cyclin p4;1	protein-coding
2133	2	8543971	8544162	+	0	NA	Intergenic	Intergenic	-1568	AT2G19806.1	3768172				AT2G19806	-	pseudo	pseudo
3897	3	18301674	18301838	+	0	NA	Intergenic	Intergenic	-1567	AT3G49350.1	824097	At.35617	NM_114795		AT3G49350	-	RabGAP/TBC domain-containing protein	protein-coding
5889	5	6399580	6399765	+	0	NA	Intergenic	Intergenic	-1567	AT5G19095.1	3770689				AT5G19095	67649.TRNA-GLY-1	tRNA	tRNA
381	1	5018075	5018263	+	0	NA	Intergenic	Intergenic	-1565	AT1G14620.1	838024	At.11695	NM_101329		DECOY	T5E21.12|T5E21_12	protein decoy	protein-coding
2100	2	7835475	7835606	+	0	NA	Intergenic	Intergenic	-1562	AT2G18020.1	816314	At.24098	NM_127358		EMB2296	T27K22.11|T27K22_11|embryo defective 2296	60S ribosomal protein L8-1	protein-coding
6381	5	20546221	20546407	+	0	NA	Intergenic	Intergenic	-1561	AT5G50450.1	835113	At.24402	NM_124427		AT5G50450	MXI22.17|MXI22_17	MYND-type zinc finger protein	protein-coding
5953	5	7252017	7252180	+	0	NA	Intergenic	Intergenic	-1559	AT5G21940.1	832254	At.21428	NM_147877		AT5G21940	-	hypothetical protein	protein-coding
2391	2	12430217	12430361	+	0	NA	Intergenic	Intergenic	-1559	AT2G28940.1	817443	At.46050	NM_179797		AT2G28940	T9I4.2|T9I4_2	protein kinase family protein	protein-coding
2481	2	13702602	13702723	+	0	NA	Intergenic	Intergenic	-1559	AT2G32270.1	817787	At.10705	NM_128786		ZIP3	T32F6.21|T32F6_21|zinc transporter 3 precursor	zinc transporter 3	protein-coding
1708	1	28039555	28039713	+	0	NA	Intergenic	Intergenic	-1557	AT1G74650.1	843804	At.23	NM_106123		MYB31	ARABIDOPSIS THALIANA MYB DOMAIN PROTEIN 31|ATMYB31|ATY13|F1M20.33|F1M20_33|myb domain protein 31	myb domain protein 31	protein-coding
4854	4	12290172	12290354	+	0	NA	Intergenic	Intergenic	-1557	AT4G23550.1	828455	At.27348	NM_118486		WRKY29	ATWRKY29|F9D16.20|F9D16_20	putative WRKY transcription factor 29	protein-coding
3903	3	18411167	18411357	+	0	NA	Intergenic	ATREP3|RC|Helitron	-1553	AT3G49650.1	824127	At.35579	NM_114825		AT3G49650	-	P-loop containing nucleoside triphosphate hydrolase-like protein	protein-coding
6089	5	10356755	10356885	+	0	NA	Intergenic	Intergenic	-1553	AT5G28410.1	832927	At.55064	NM_122724		AT5G28410	F21B23.2|F21B23_2	hypothetical protein	protein-coding
2575	2	15093899	15094036	+	0	NA	Intergenic	Intergenic	-1552	AT2G35940.1	818167	At.23033	NM_129153		BLH1	BEL1-like homeodomain 1|EDA29|F11F19.15|F11F19_15|embryo sac development arrest 29	BEL1-like homeodomain 1	protein-coding
2865	2	18372659	18372824	+	0	NA	Intergenic	Intergenic	-1551	AT2G44500.2	819057	At.21825	NM_130013		AT2G44500	F4I1.31	O-fucosyltransferase family protein	protein-coding
696	1	8547900	8548037	+	0	NA	Intergenic	Intergenic	-1550	AT1G24150.1	839028	At.41473	NM_102261		FH4	ATFH4|F3I6.8|F3I6_8|FORMIN HOMOLOGUE 4|formin homologue 4	formin-like protein 4	protein-coding
3568	3	7473064	7473196	+	0	NA	Intergenic	Intergenic	-1549	AT3G21270.1	821681	At.257	NM_113022		DOF2	ADOF2|DOF zinc finger protein 2	Dof zinc finger protein DOF2	protein-coding
2772	2	17445110	17445283	+	0	NA	Intergenic	Intergenic	-1548	AT2G41820.1	818781	At.43213	NM_129746		AT2G41820	T11A7.8|T11A7_8	leucine-rich repeat receptor-like tyrosine-protein kinase	protein-coding
525	1	6674110	6674288	+	0	NA	Intergenic	Intergenic	-1546	AT1G19300.1	838512	At.16709	NM_101787		PARVUS	ATGATL1|F18O14.2|F18O14_2|GALACTURONOSYLTRANSFERASE-LIKE 1|GAOLAOZHUANGREN 1|GATL1|GLZ1	putative galacturonosyltransferase-like 1	protein-coding
4405	4	933448	933635	+	0	NA	Intergenic	Intergenic	-1545	AT4G02110.1	828135	At.54093	NM_116443		AT4G02110	T10M13.12|T10M13_12	transcription coactivator protein	protein-coding
2577	2	15103129	15103314	+	0	NA	Intergenic	Intergenic	-1540	AT2G35950.1	818168	At.37609	NM_129154		EDA12	F11F19.14|F11F19_14|embryo sac development arrest 12	protein EMBRYO SAC DEVELOPMENT ARREST 12	protein-coding
2898	2	18632161	18632342	+	0	NA	Intergenic	Intergenic	-1539	AT2G45190.1	819127	At.10852	NM_130082		AFO	ABNORMAL FLORAL ORGANS|ABNORMAL FLORAL ORGANS PROTEIN|F4L23.30|FIL|FILAMENTOUS FLOWER|YAB1|YABBY1	axial regulator YABBY 1	protein-coding
2471	2	13623252	13623256	+	0	NA	Intergenic	Intergenic	-1538	AT2G32010.2	817761	At.13598	NM_128761		CVL1	CVP2 like 1|F22D22.24|F22D22_24	inositol polyphosphate 5'-phosphatase	protein-coding
6406	5	21038153	21038300	+	0	NA	Intergenic	Intergenic	-1536	AT5G51790.1	835253	At.55493	NM_124558		AT5G51790	MIO24.8|MIO24_8	transcription factor bHLH120	protein-coding
1321	1	23893619	23893799	+	0	NA	Intergenic	Intergenic	-1536	AT1G64380.1	842745	At.36008	NM_105113		AT1G64380	F15H21.12|F15H21_12	ethylene-responsive transcription factor ERF061	protein-coding
1238	1	22098018	22098209	+	0	NA	Intergenic	Intergenic	-1536	AT1G60010.1	842295	At.36736	NM_104693		AT1G60010	T2K10.6|T2K10_6	hypothetical protein	protein-coding
4658	4	9599830	9600005	+	0	NA	Intergenic	Intergenic	-1534	AT4G17080.1	827416	At.45809	NM_117812		AT4G17080	DL4570W|FCAALL.347	Histone H3 K4-specific methyltransferase SET7/9 family protein	protein-coding
3339	3	4407315	4407468	+	0	NA	Intergenic	Intergenic	-1534	AT3G13520.1	820554	At.20617	NM_112198		AGP12	ATAGP12|arabinogalactan protein 12	arabinogalactan protein 12	protein-coding
3573	3	7503292	7503457	+	0	NA	Intergenic	Intergenic	-1533	AT3G21320.1	821686	At.51217	NM_113027		AT3G21320	-	hypothetical protein	protein-coding
6858	5	26492816	26493013	+	0	NA	Intergenic	Intergenic	-1532	AT5G66310.1	836763	At.9634	NM_126029		AT5G66310	K1L20.9|K1L20_9	ATP binding microtubule motor family protein	protein-coding
6901	5	26811190	26811250	+	0	NA	Intergenic	Intergenic	-1531	AT5G67190.1	836854	At.50633	NM_126119		DEAR2	DREB and EAR motif protein 2|K21H1.15|K21H1_15	ethylene-responsive transcription factor ERF010	protein-coding
3707	3	9472380	9472573	+	0	NA	Intergenic	Intergenic	-1526	AT3G25882.1	822184	At.6314	NM_148752		NIMIN-2	NIM1-interacting 2	protein NIM1-INTERACTING 2	protein-coding
6727	5	25046279	25046469	+	0	NA	Intergenic	Intergenic	-1525	AT5G62370.1	836358	At.65697	NM_125631		AT5G62370	MMI9.20|MMI9_20	pentatricopeptide repeat-containing protein	protein-coding
2746	2	17163569	17163765	+	0	NA	Intergenic	Intergenic	-1524	AT2G41180.1	818717	At.12552	NM_129683		AT2G41180	T3K9.5|T3K9_5	VQ motif-containing protein	protein-coding
3936	3	18765455	18765624	+	0	NA	Intergenic	Intergenic	-1523	AT3G50560.1	824220	At.26622	NM_114916		AT3G50560	-	Rossmann-fold NAD(P)-binding domain-containing protein	protein-coding
3988	3	19230599	19230774	+	0	NA	Intergenic	Intergenic	-1523	AT3G51840.1	824347	At.21620	NM_115043		ACX4	ATG6|ATSCX|SHORT-CHAIN ACYL COA OXIDASE|acyl-CoA oxidase 4	acyl-coenzyme A oxidase 4	protein-coding
6460	5	21737259	21737402	+	0	NA	Intergenic	Intergenic	-1519	AT5G53510.1	835433	At.55524	NM_124731		OPT9	ATOPT9|MNC6.5|MNC6_5|oligopeptide transporter 9	oligopeptide transporter 9	protein-coding
2676	2	16378441	16378635	+	0	NA	Intergenic	Intergenic	-1518	AT2G39220.1	818507	At.27277	NM_129480		PLP6	PATATIN-like protein 6|PLA IIB|T16B24.14|T16B24_14	PATATIN-like protein 6	protein-coding
1948	2	299522	299717	+	0	NA	Intergenic	Intergenic	-1518	AT2G01670.1	814696	At.25360	NM_126228		NUDT17	T8O11.16|T8O11_16|atnudt17|nudix hydrolase homolog 17	nudix hydrolase 17	protein-coding
6756	5	25430548	25430710	+	0	NA	Intergenic	Intergenic	-1517	AT5G63520.1	836471	At.46068	NM_125747		AT5G63520	MLE2.15|MLE2_15	hypothetical protein	protein-coding
5955	5	7267099	7267291	+	0	NA	Intergenic	Intergenic	-1517	AT5G21280.1	832258	At.45837	NM_147881		AT5G21280	-	hydroxyproline-rich glycoprotein family protein	protein-coding
4226	3	22414062	22414181	+	0	NA	Intergenic	Intergenic	-1513	AT3G60630.1	825234	At.27084	NM_115927		HAM2	ARABIDOPSIS THALIANA HAIRY MERISTEM 2|ATHAM2|HAIRY MERISTEM 2	protein LOST MERISTEM 2	protein-coding
2075	2	7239023	7239201	+	0	NA	Intergenic	Intergenic	-1512	AT2G16690.1	816170				AT2G16690	T24I21.10|T24I21_10	pseudo	pseudo
416	1	5197433	5197581	+	0	NA	Intergenic	Intergenic	-1511	AT1G15110.1	838074	At.41943	NM_101379		AT1G15110	F9L1.4|F9L1_4	phosphatidylserine synthase 1	protein-coding
2152	2	8853751	8853948	+	0	NA	Intergenic	Intergenic	-1509	AT2G20570.2	816579	At.24134	NM_127617		GPRI1	ARABIDOPSIS GOLDEN2-LIKE 1|ATGLK1|GBF's pro-rich region-interacting factor 1|GLK1|GOLDEN2-LIKE 1|T13C7.1	transcription activator GLK1	protein-coding
1150	1	20239677	20239758	+	0	NA	Intergenic	Intergenic	-1509	AT1G54210.2	841861	At.43297	NM_104299		ATG12A	APG12|ATATG12|AUTOPHAGY 12|AUTOPHAGY 12 A|F20D21.38|F20D21_38	ubiquitin-like protein ATG12A	protein-coding
6703	5	24887018	24887201	+	0	NA	Intergenic	Intergenic	-1508	AT5G61970.1	836318	At.20648	NM_125590		AT5G61970	K22G18.11|K22G18_11	signal recognition particle subunit SRP68	protein-coding
1108	1	19810669	19810839	+	0	NA	Intergenic	Intergenic	-1508	AT1G53163.1	5007796	At.71193	NM_001084238		AT1G53163	-	hypothetical protein	protein-coding
6343	5	19785183	19785335	+	0	NA	Intergenic	Intergenic	-1505	AT5G48800.1	834938	At.23051	NM_124257		AT5G48800	K24G6.13|K24G6_13	phototropic-responsive NPH3 protein	protein-coding
2006	2	1263544	1263687	+	0	NA	Intergenic	ATREP4|RC|Helitron	-1503	AT2G03990.1	3768054				AT2G03990	F3C11.10	pseudo	pseudo
5071	4	14999193	14999383	+	0	NA	Intergenic	Intergenic	-1503	AT4G30790.1	829202	At.42964	NM_119225		AT4G30790	T10C21.140|T10C21_140	hypothetical protein	protein-coding
6289	5	18957576	18957762	+	0	NA	Intergenic	Intergenic	-1500	AT5G46720.1	834715	At.29933	NM_124042		AT5G46720	MZA15.13|MZA15_13	AIG2-like (avirulence induced gene) family protein	protein-coding
6828	5	26229861	26230032	+	0	NA	Intergenic	Intergenic	-1497	AT5G65630.1	836689	At.49230	NM_125961		GTE7	K21L13.15|K21L13_15|global transcription factor group E7	global transcription factor group E7	protein-coding
3613	3	8111131	8111321	+	0	NA	Intergenic	Intergenic	-1497	AT3G22890.1	821861	At.19053	NM_113189		APS1	ATP sulfurylase 1	ATP sulfurylase 1	protein-coding
5884	5	6360528	6360712	+	0	NA	Intergenic	Intergenic	-1496	AT5G19030.1	832022	At.31343	NM_121908		AT5G19030	T16G12.70|T16G12_70	RNA recognition motif-containing protein	protein-coding
5019	4	14408778	14408909	+	0	NA	Intergenic	Intergenic	-1495	AT4G29230.1	829044	At.31945	NM_119067		NAC075	F17A13.50|F17A13_50|NAC domain containing protein 75|anac075	NAC domain containing protein 75	protein-coding
6314	5	19219346	19219456	+	0	NA	Intergenic	Intergenic	-1492	AT5G47370.1	834784	At.25127	NM_124108		HAT2	MQL5.23|MQL5_23	homeobox-leucine zipper protein HAT2	protein-coding
1827	1	29279917	29280103	+	0	NA	Intergenic	Intergenic	-1492	AT1G77855.1	844121	At.50663	NM_148664		AT1G77855	-	hypothetical protein	protein-coding
6445	5	21652992	21653179	+	0	NA	Intergenic	Intergenic	-1492	AT5G53370.1	835418	At.24561	NM_124716		PMEPCRF	ATPMEPCRF|K19E1.17|K19E1_17|PECTIN METHYLESTERASE PCR FRAGMENT F|pectin methylesterase PCR fragment F	pectin methylesterase PCR fragment F	protein-coding
1537	1	26399209	26399404	+	0	NA	Intergenic	Intergenic	-1484	AT1G70090.1	843345	At.20996	NM_105677		LGT8	F20P5.18|F20P5_18|GALACTURONOSYLTRANSFERASE-LIKE 9|GATL9|glucosyl transferase family 8	putative galacturonosyltransferase-like 9	protein-coding
5325	4	17766467	17766654	+	0	NA	Intergenic	Intergenic	-1482	AT4G37790.1	829935	At.23912	NM_119941		HAT22	HOMEOBOX PROTEIN|T28I19.70|T28I19_70	homeobox-leucine zipper protein HAT22	protein-coding
4171	3	21678745	21678943	+	0	NA	Intergenic	Intergenic	-1482	AT3G58620.1	825031	At.34711	NM_115724		TTL4	tetratricopetide-repeat thioredoxin-like 4	TPR repeat-containing thioredoxin TTL4	protein-coding
5825	5	5417324	5417499	+	0	NA	Intergenic	Intergenic	-1480	AT5G16567.1	6240540	At.73426	NM_001125764		AT5G16567	-	hypothetical protein	protein-coding
1944	2	258938	259123	+	0	NA	Intergenic	Intergenic	-1480	AT2G01570.1	814686	At.24012	NM_126218		RGA1	F2I9.19|F2I9_19|REPRESSOR OF GA|REPRESSOR OF GA1-3 1|RGA	DELLA protein RGA	protein-coding
5062	4	14873564	14873748	+	0	NA	Intergenic	Intergenic	-1480	AT4G30410.2	829164	At.31836	NM_119187		AT4G30410	F17I23.250|F17I23_250	protein IBH1-LIKE 1	protein-coding
232	1	2991869	2991982	+	0	NA	Intergenic	Intergenic	-1479	AT1G09260.1	837447	At.51532	NM_100796		AT1G09260	T12M4.3|T12M4_3	Chaperone DnaJ-domain-containing protein	protein-coding
5535	5	1307498	1307693	+	0	NA	Intergenic	Intergenic	-1479	AT5G04550.1	830334	At.27330	NM_120537		AT5G04550	T32M21.140|T32M21_140	hypothetical protein	protein-coding
3666	3	8866320	8866466	+	0	NA	Intergenic	Intergenic	-1479	AT3G24420.1	822032	At.37532	NM_113349		AT3G24420	-	hydrolase, alpha/beta fold family protein	protein-coding
3636	3	8337324	8337520	+	0	NA	Intergenic	HELITRONY3|RC|Helitron	-1478	AT3G23310.1	821911	At.27123	NM_113233		AT3G23310	-	AGC (cAMP-dependent, cGMP-dependent and protein kinase C) kinase family protein	protein-coding
1792	1	28732672	28732840	+	0	NA	Intergenic	Intergenic	-1478	AT1G76580.1	843991	At.504	NM_106308		AT1G76580	F14G6.18|F14G6_18	squamosa promoter-binding-like protein 16	protein-coding
372	1	4977101	4977264	+	0	NA	Intergenic	Intergenic	-1477	AT1G14540.1	838016	At.41966	NM_101321		AT1G14540	F14L17.32|F14L17_32	peroxidase 4	protein-coding
118	1	1424077	1424158	+	0	NA	Intergenic	Intergenic	-1476	AT1G05000.1	839348	At.43231	NM_100379		AT1G05000	T7A14.14|T7A14_14	atypical dual-speci###city phosphatase 1	protein-coding
4508	4	6444823	6444999	+	0	NA	Intergenic	Intergenic	-1476	AT4G10390.1	826631	At.33632	NM_117107		AT4G10390	F7L13.4	probable receptor-like protein kinase	protein-coding
6094	5	10799643	10799751	+	0	NA	Intergenic	Intergenic	-1475	AT5G28770.2	832990	At.15754	NM_122760		BZO2H3	Arabidopsis thaliana basic leucine zipper 63|AtbZIP63|T32B20.4|T32B20_4	basic leucine zipper 63	protein-coding
5893	5	6420440	6420578	+	0	NA	Intergenic	ATREP3|RC|Helitron	-1474	AT5G19130.1	832033	At.70275	NM_121918		AT5G19130	T24G5.30|T24G5_30	GPI transamidase component family protein / Gaa1-like family protein	protein-coding
5508	5	968707	968885	+	0	NA	Intergenic	Intergenic	-1474	AT5G03700.1	831753	At.65485	NM_120451		AT5G03700	F17C15.120|F17C15_120	D-mannose binding lectin protein with Apple-like carbohydrate-binding domain	protein-coding
3630	3	8218470	8218652	+	0	NA	Intergenic	Intergenic	-1474	AT3G23090.2	821884	At.43419	NM_113210		AT3G23090	-	targeting protein for Xklp2-like protein	protein-coding
1095	1	19427311	19427493	+	0	NA	Intergenic	Intergenic	-1474	AT1G52180.1	841648	At.52153	NM_104098		AT1G52180	F9I5.3|F9I5_3	aquaporin-like protein	protein-coding
4936	4	13175860	13176015	+	0	NA	Intergenic	Intergenic	-1472	AT4G25960.1	828702	At.20799	NM_118729		PGP2	F20B18.70|F20B18_70|P-glycoprotein 2	P-glycoprotein 2	protein-coding
6720	5	25015507	25015695	+	0	NA	Intergenic	Intergenic	-1472	AT5G62280.1	836349	At.24047	NM_125622		AT5G62280	MMI9.11|MMI9_11	hypothetical protein	protein-coding
345	1	4656993	4657144	+	0	NA	Intergenic	ATREP10D|RC|Helitron	-1470	AT1G13605.1	3766718	At.63164	NM_001035961		AT1G13605	-	defensin-like protein 268	protein-coding
681	1	8194290	8194322	+	0	NA	Intergenic	Intergenic	-1470	AT1G23100.1	838918	At.41569	NM_102158		AT1G23100	T26J12.12|T26J12_12	GroES-like protein	protein-coding
3494	3	6269972	6270141	+	0	NA	Intergenic	Intergenic	-1470	AT3G18282.1	7922437	At.69003	NM_001161152		AT3G18282	-	hypothetical protein	protein-coding
4731	4	10474127	10474298	+	0	NA	Intergenic	Intergenic	-1470	AT4G19150.1	827653	At.43375	NM_118034		AT4G19150	T18B16.120|T18B16_120	ankyrin repeat-containing protein	protein-coding
3166	3	1951186	1951330	+	0	NA	Intergenic	Intergenic	-1469	AT3G06410.1	819815	At.27771	NM_111516		AT3G06410	F24P17.12|F24P17_12	zinc finger CCCH domain-containing protein 34	protein-coding
5674	5	3508569	3508730	+	0	NA	Intergenic	Intergenic	-1469	AT5G11060.1	830973	At.5377	NM_121144		KNAT4	KNOTTED1-like homeobox gene 4|T5K6.50|T5K6_50	homeobox protein knotted-1-like 4	protein-coding
335	1	4540611	4540793	+	0	NA	Intergenic	Intergenic	-1466	AT1G13260.1	837886	At.20558	NM_101197		RAV1	EDF4|ETHYLENE RESPONSE DNA BINDING FACTOR 4|T6J4.2|T6J4_2|related to ABI3/VP1 1	AP2/ERF and B3 domain-containing transcription factor RAV1	protein-coding
6672	5	24436716	24436894	+	0	NA	Intergenic	Intergenic	-1466	AT5G60760.1	836197	At.29145	NM_125469		AT5G60760	MAE1.1|MAE1_1	phytic acid metabolising protein	protein-coding
4184	3	22007520	22007669	+	0	NA	Intergenic	Intergenic	-1457	AT3G59580.1	825127	At.34613	NM_115820		AT3G59580	-	nodule inception protein-like protein 9	protein-coding
1304	1	23612909	23613057	+	0	NA	Intergenic	Intergenic	-1454	AT1G63680.1	842672	At.36093	NM_105045		MURE	ATMURE|F24D7.13|F24D7_13|PDE316|PIGMENT DEFECTIVE EMBRYO 316	putative UDP-N-acetylmuamoylalanyl-d-glutamate-2,6-diaminopimelate ligase	protein-coding
3231	3	3046290	3046454	+	0	NA	Intergenic	Intergenic	-1453	AT3G09920.3	820151	At.40019	NM_111827		PIP5K9	phosphatidyl inositol monophosphate 5 kinase	phosphatidyl inositol monophosphate 5 kinase	protein-coding
618	1	7664114	7664310	+	0	NA	Intergenic	Intergenic	-1452	AT1G21835.1	5007711	At.72232	NM_001084106		AT1G21835	-	plant thionin family protein	protein-coding
5788	5	4812697	4812889	+	0	NA	Intergenic	Intergenic	-1451	AT5G14880.1	831340	At.31871	NM_121492		AT5G14880	T9L3.180|T9L3_180	potassium transporter 8	protein-coding
3861	3	17542597	17542766	+	0	NA	Intergenic	Intergenic	-1451	AT3G47600.1	823914	At.21591	NM_114628		MYB94	ATMYB94|ATMYBCP70|myb domain protein 94	putative transcription factor MYB94	protein-coding
6389	5	20728088	20728236	+	0	NA	Intergenic	Intergenic	-1450	AT5G50950.1	835168	At.6963	NM_124474		FUM2	FUMARASE 2|K3K7.11|K3K7_11	fumarate hydratase 2	protein-coding
950	1	12131756	12131955	+	0	NA	Intergenic	Intergenic	-1448	AT1G33440.1	840237	At.49935	NM_103069		AT1G33440	F10C21.11|F10C21_11	probable peptide/nitrate transporter	protein-coding
3429	3	5262523	5262630	+	0	NA	Intergenic	Intergenic	-1448	AT3G15540.1	820793	At.10479	NM_112422		IAA19	MASSUGU 2|MJK13.22|MSG2|indole-3-acetic acid inducible 19	auxin-responsive protein IAA19	protein-coding
2608	2	15513642	15513732	+	0	NA	Intergenic	Intergenic	-1446	AT2G36950.1	818269	At.24096	NM_129251		AT2G36950	T1J8.13|T1J8_13	heavy-metal-associated domain-containing protein	protein-coding
4610	4	8935871	8936023	+	0	NA	Intergenic	Intergenic	-1446	AT4G15700.1	827247	At.43586	NM_117661		AT4G15700	DL3890W|FCAALL.358	monothiol glutaredoxin-S3	protein-coding
206	1	2519897	2520084	+	0	NA	Intergenic	Intergenic	-1444	AT1G08080.1	837326	At.42275	NM_100683		ACA7	A. THALIANA ALPHA CARBONIC ANHYDRASE 7|ATACA7|T6D22.16|T6D22_16|alpha carbonic anhydrase 7	alpha carbonic anhydrase 7	protein-coding
589	1	7344624	7344800	+	0	NA	Intergenic	Intergenic	-1444	AT1G21010.1	838695	At.41675	NM_101954		AT1G21010	F9H16.19|F9H16_19	hypothetical protein	protein-coding
5515	5	1045617	1045798	+	0	NA	Intergenic	Intergenic	-1443	AT5G03890.1	831673	At.54714	NM_120470		AT5G03890	F8F6.100	hypothetical protein	protein-coding
1809	1	28880283	28880468	+	0	NA	Intergenic	Intergenic	-1439	AT1G76900.2	844025	At.17482	NM_106341		TLP1	AtTLP1|F7O12.7|tubby like protein 1	tubby-like F-box protein 1	protein-coding
5868	5	6185346	6185438	+	0	NA	Intergenic	Intergenic	-1438	AT5G18600.1	831978	At.43305	NM_121865		AT5G18600	T28N17.80|T28N17_80	monothiol glutaredoxin-S2	protein-coding
288	1	3775815	3775968	+	0	NA	Intergenic	Intergenic	-1437	AT1G11260.1	837667	At.24793	NM_100998		STP1	ATSTP1|SUGAR TRANSPORTER 1|T28P6.9|T28P6_9|sugar transporter 1	sugar transporter 1	protein-coding
842	1	10243474	10243589	+	0	NA	Intergenic	Intergenic	-1435	AT1G29290.1	839803	At.40770	NM_102669		AT1G29290	F28N24.30|F28N24_30	hypothetical protein	protein-coding
6144	5	16196996	16197177	+	0	NA	Intergenic	Intergenic	-1435	AT5G40450.1	834043	At.21737	NM_123409		AT5G40450	MPO12.160|MPO12_160	hypothetical protein	protein-coding
5102	4	15486424	15486595	+	0	NA	Intergenic	Intergenic	-1435	AT4G32020.1	829333	At.25285	NM_119354		AT4G32020	F10N7.170|F10N7_170	hypothetical protein	protein-coding
5792	5	4917238	4917414	+	0	NA	Intergenic	Intergenic	-1434	AT5G15150.1	831367	At.49022	NM_121519		HB-3	ATHB-3|ATHB3|F8M21.40|F8M21_40|HAT7|HOMEOBOX FROM ARABIDOPSIS THALIANA 7|HOMEOBOX PROTEIN|homeobox 3	homeobox-leucine zipper protein HAT7	protein-coding
[truncated: 5,617 more rows]

## Sheet: Table5_Overlap profiles
Overlap RNA-seq / ChIP-seq datasets
AT1G23080	PIN-FORMED 7 (PIN7)
[truncated: 70 more rows]

## Sheet: Table6_RNA-seq IAA-CK
ARF and Aux-IAA factors expressed in the SAM (Vernoux & al 2011)
[truncated: 42 more rows]
