# Supplementary material for: Control of plant cell fate transitions by transcriptional and hormonal signals
Source: eLife journal article supplement (doi:10.7554/elife.30135), 2017-10-23
Supplement: supp [file elife-30135-supp-v1.zip › elife_poa_e30135_Supplementary_file_2.xlsx]

## Sheet: Sheet1
List primers
Primers	Sequence (5´to 3´)	Purpose
A04749	gaa caG AAT TCG GTC TCa acc tag atg gat cag cat ttc c	CUC2 promoter
A04780	gaa caG GAT CCG GTC TCt tgt tta aga aga aag atc taa agc	CUC2 promoter
A01602	gac tGG ATC Caa caa tgg tga gca agg gcg ag	FluorescentTimer
A01603	gct tGA ATT Cgg ccg ctg cag caa tct tgt aca gct cgt cca tg	FluorescentTimer
A01261	att gGG TAC Cgt taa gtg atc ttg acc gtc	KNOLLE promoter
A01262	tag tGG ATC Cct ttt tca cct gaa agt caa caa ttt tac aag	KNOLLE promoter
A02299	CGG CAG GAT CCA ACA ATG GAT TCT GAC ATA ATG	HEC1-linker-GFP
A02300	TTG CCT CTA Gat GCg Gca CTt GCG ATC GC	HEC1-linker-GFP
A02301	GGC AAT CTA GAA TGG TGA GCA AGG GCG AG	HEC1-linker-GFP
A02302	GGT TCC TCG AGT CAC CAT GGT ACG TAG AGC TCC TTG TAC AGC TCG TCC AT	HEC1-linker-GFP
A01862	TGA CCG GAT CCA ACA ATG GAT TCT GAC ATA ATG	HEC1-linker-GR
A01863	GGT CAG CGG CCG CTC TAA GAA TCT GTG CAT T	HEC1-linker-GR
oJJR858	CTATTTACAATTGTCGACATGATGGCTTCATTGTCTTGTG	ARF5 in SPYCE/SPYNE
oJJR859	TTTCGAACCCGGGGTACCTGAAACAGAAGTCTTAAGATCG	ARF5 in SPYCE/SPYNE
oJJR340B	CTATTTACAATTGTCGACATGGATTCTGACATAATGAACATG	HEC1 in SPYCE/SPYNE
oJJR341B	TTTCGAACCCGGGGTACCTCTAAGAATCTGTGCATTGCCC	HEC1 in SPYCE/SPYNE
oJJR342B	CTATTTACAATTGTCGACATGGATAACTCCGACATTCTAATGAAC	HEC2 in SPYCE/SPYNE
oJJR343B	TTTCGAACCCGGGGTACCTCTAAGAATCTGTGCATTTCC	HEC2 in SPYCE/SPYNE
oJJR344B	CTATTTACAATTGTCGACATGAATAATTATAATATGAACCCATCTC	HEC2 in SPYCE/SPYNE
oJJR345B	TTTCGAACCCGGGGTACCGATTAATTCTCCTACTCCTCTTC	HEC2 in SPYCE/SPYNE
oLJB175	CTATTTACAATTGTCGACATGCGTGGTGTGTCAGAAT	IAA12 in SPYCE/SPYNE
oLJB176	TTTCGAACCCGGGGTACCAACAGGGTTGTTTCTTTGT	IAA12 in SPYCE/SPYNE
oLJB173	AACGGCGACTGGCTGGAATTCATGCGTGGTGTGTCAGAAT	IAA12/BDL pGILDA
oLJB174	TTGGCTGCAGGTCGACTCGAGCTAAACAGGGTTGTTTCTT	IAA12/BDL pGILDA
oLJB215	AACGGCGACTGGCTGGAATTCATGGATTCTGACATAATGA	HEC1 pGILDA
oLJB216	TTGGCTGCAGGTCGACTCGAGTCATCTAAGAATCTGTGC	HEC1 pGILDA
oLJB217	AACGGCGACTGGCTGGAATTCATGGATAACTCCGACATT	HEC2 pGILDA
oLJB218	TTGGCTGCAGGTCGACTCGAGTCATCTAAGAATCTGTGCA	HEC2 pGILDA
oLJB219	AACGGCGACTGGCTGGAATTCATGAATAATTATAATATGA	HEC3 pGILDA
oLJB220	TTGGCTGCAGGTCGACTCGAGCTAGATTAATTCTCCTACT	HEC3 pGILDA
oJJR860	GATTATGCCTCTCCCGAATTCATGATGGCTTCATTGTCTTGTG	ARF5 pB42AD
oJJR861	AGAAGTCCAAAGCTTCTCGAGTGAAACAGAAGTCTTAAGATCG	ARF5 pB42AD
A00444	gag cct tac aac gct act ctg tct gtc	qRT-PCR_TUB
A00445	aca cca gac ata gta gca gaa atc aag	qRT-PCR_TUB
A06637	GTA AAG GCT CAT CAT GGC AGA	qRT-PCR_MP
A06638	TCA ATT GAT CTC CCG ACT GAC	qRT-PCR_MP
A06643	GGT GGG TTA ACT CAT CCA AGG	qRT-PCR_SPT
A06644	TTT TAG GTC AGG TTG TCC ATC A	qRT-PCR_SPT
