# Supplementary figures and images for: Control of plant cell fate transitions by transcriptional and hormonal signals
Source: eLife journal article supplement (doi:10.7554/elife.30135), 2017-10-23

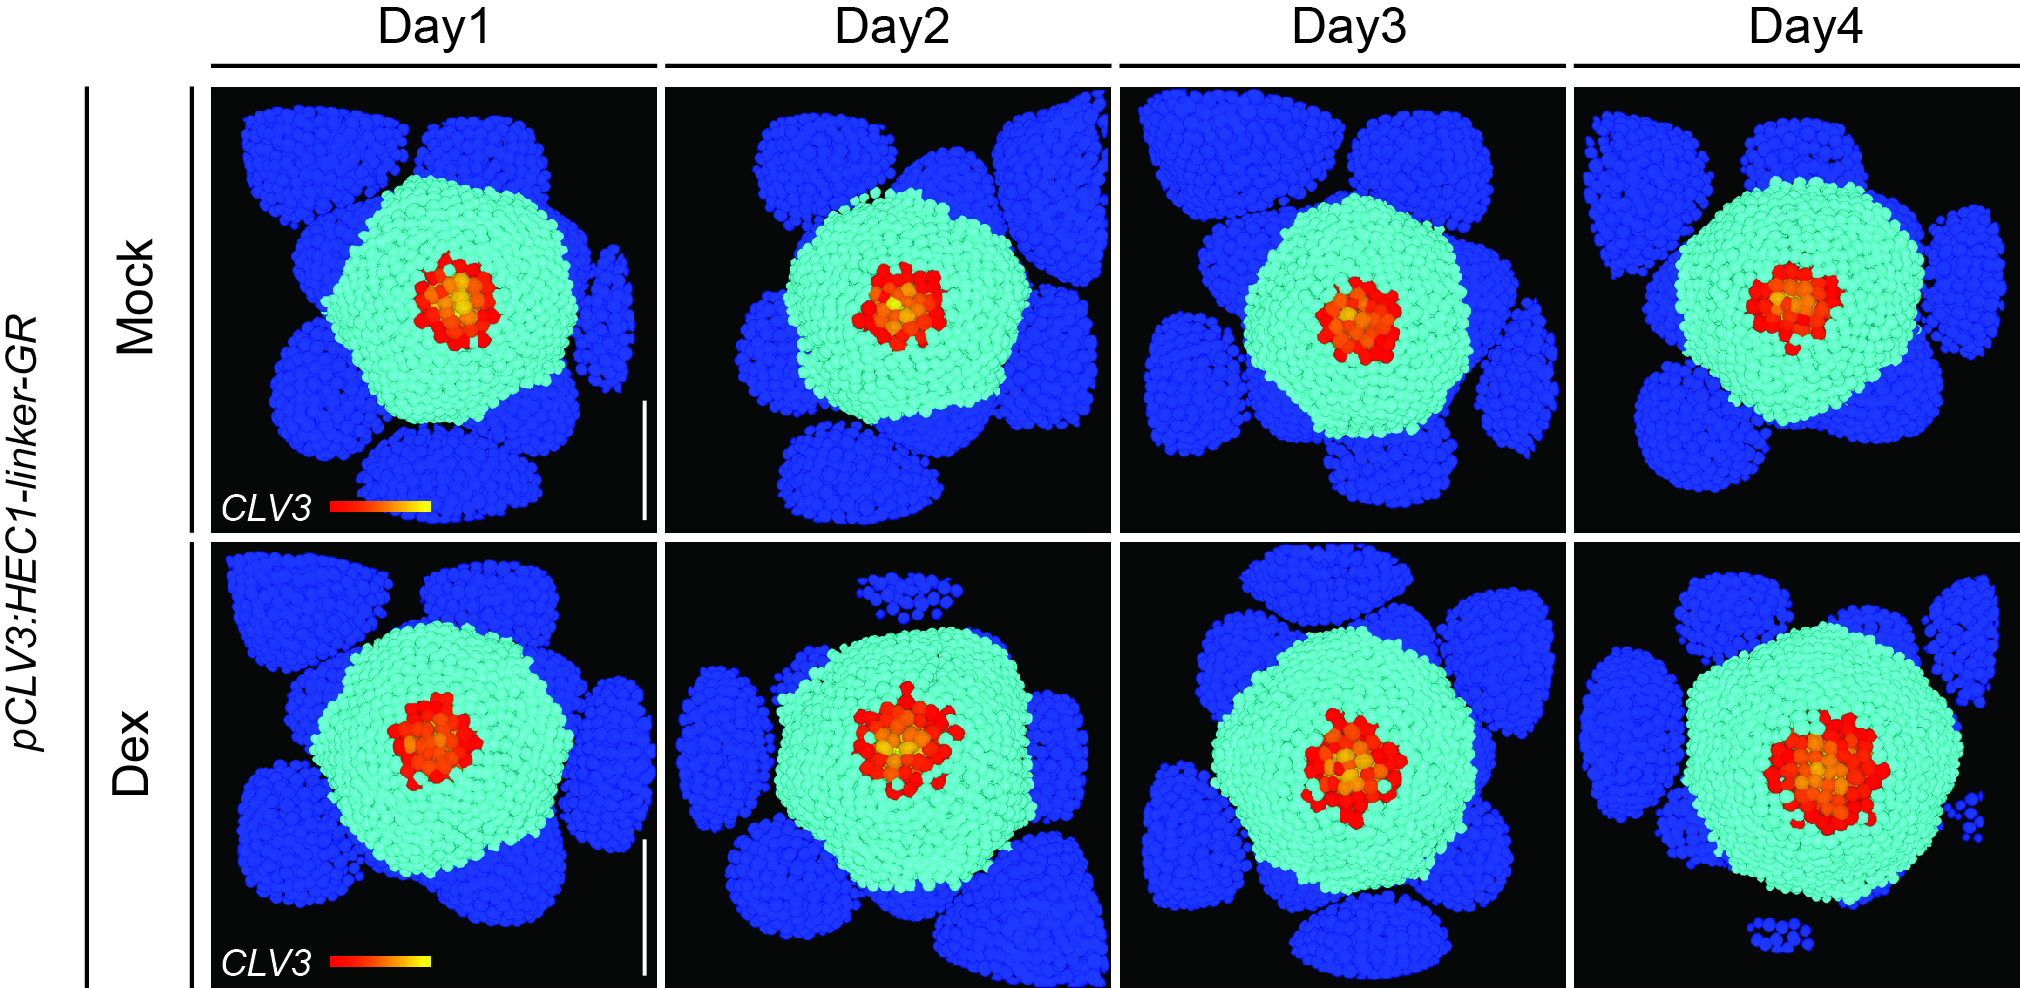

Supplement: supp [file elife-30135-supp-v1.zip › elife_poa_e30135_Figure_2_figure_supplement_6.jpg]

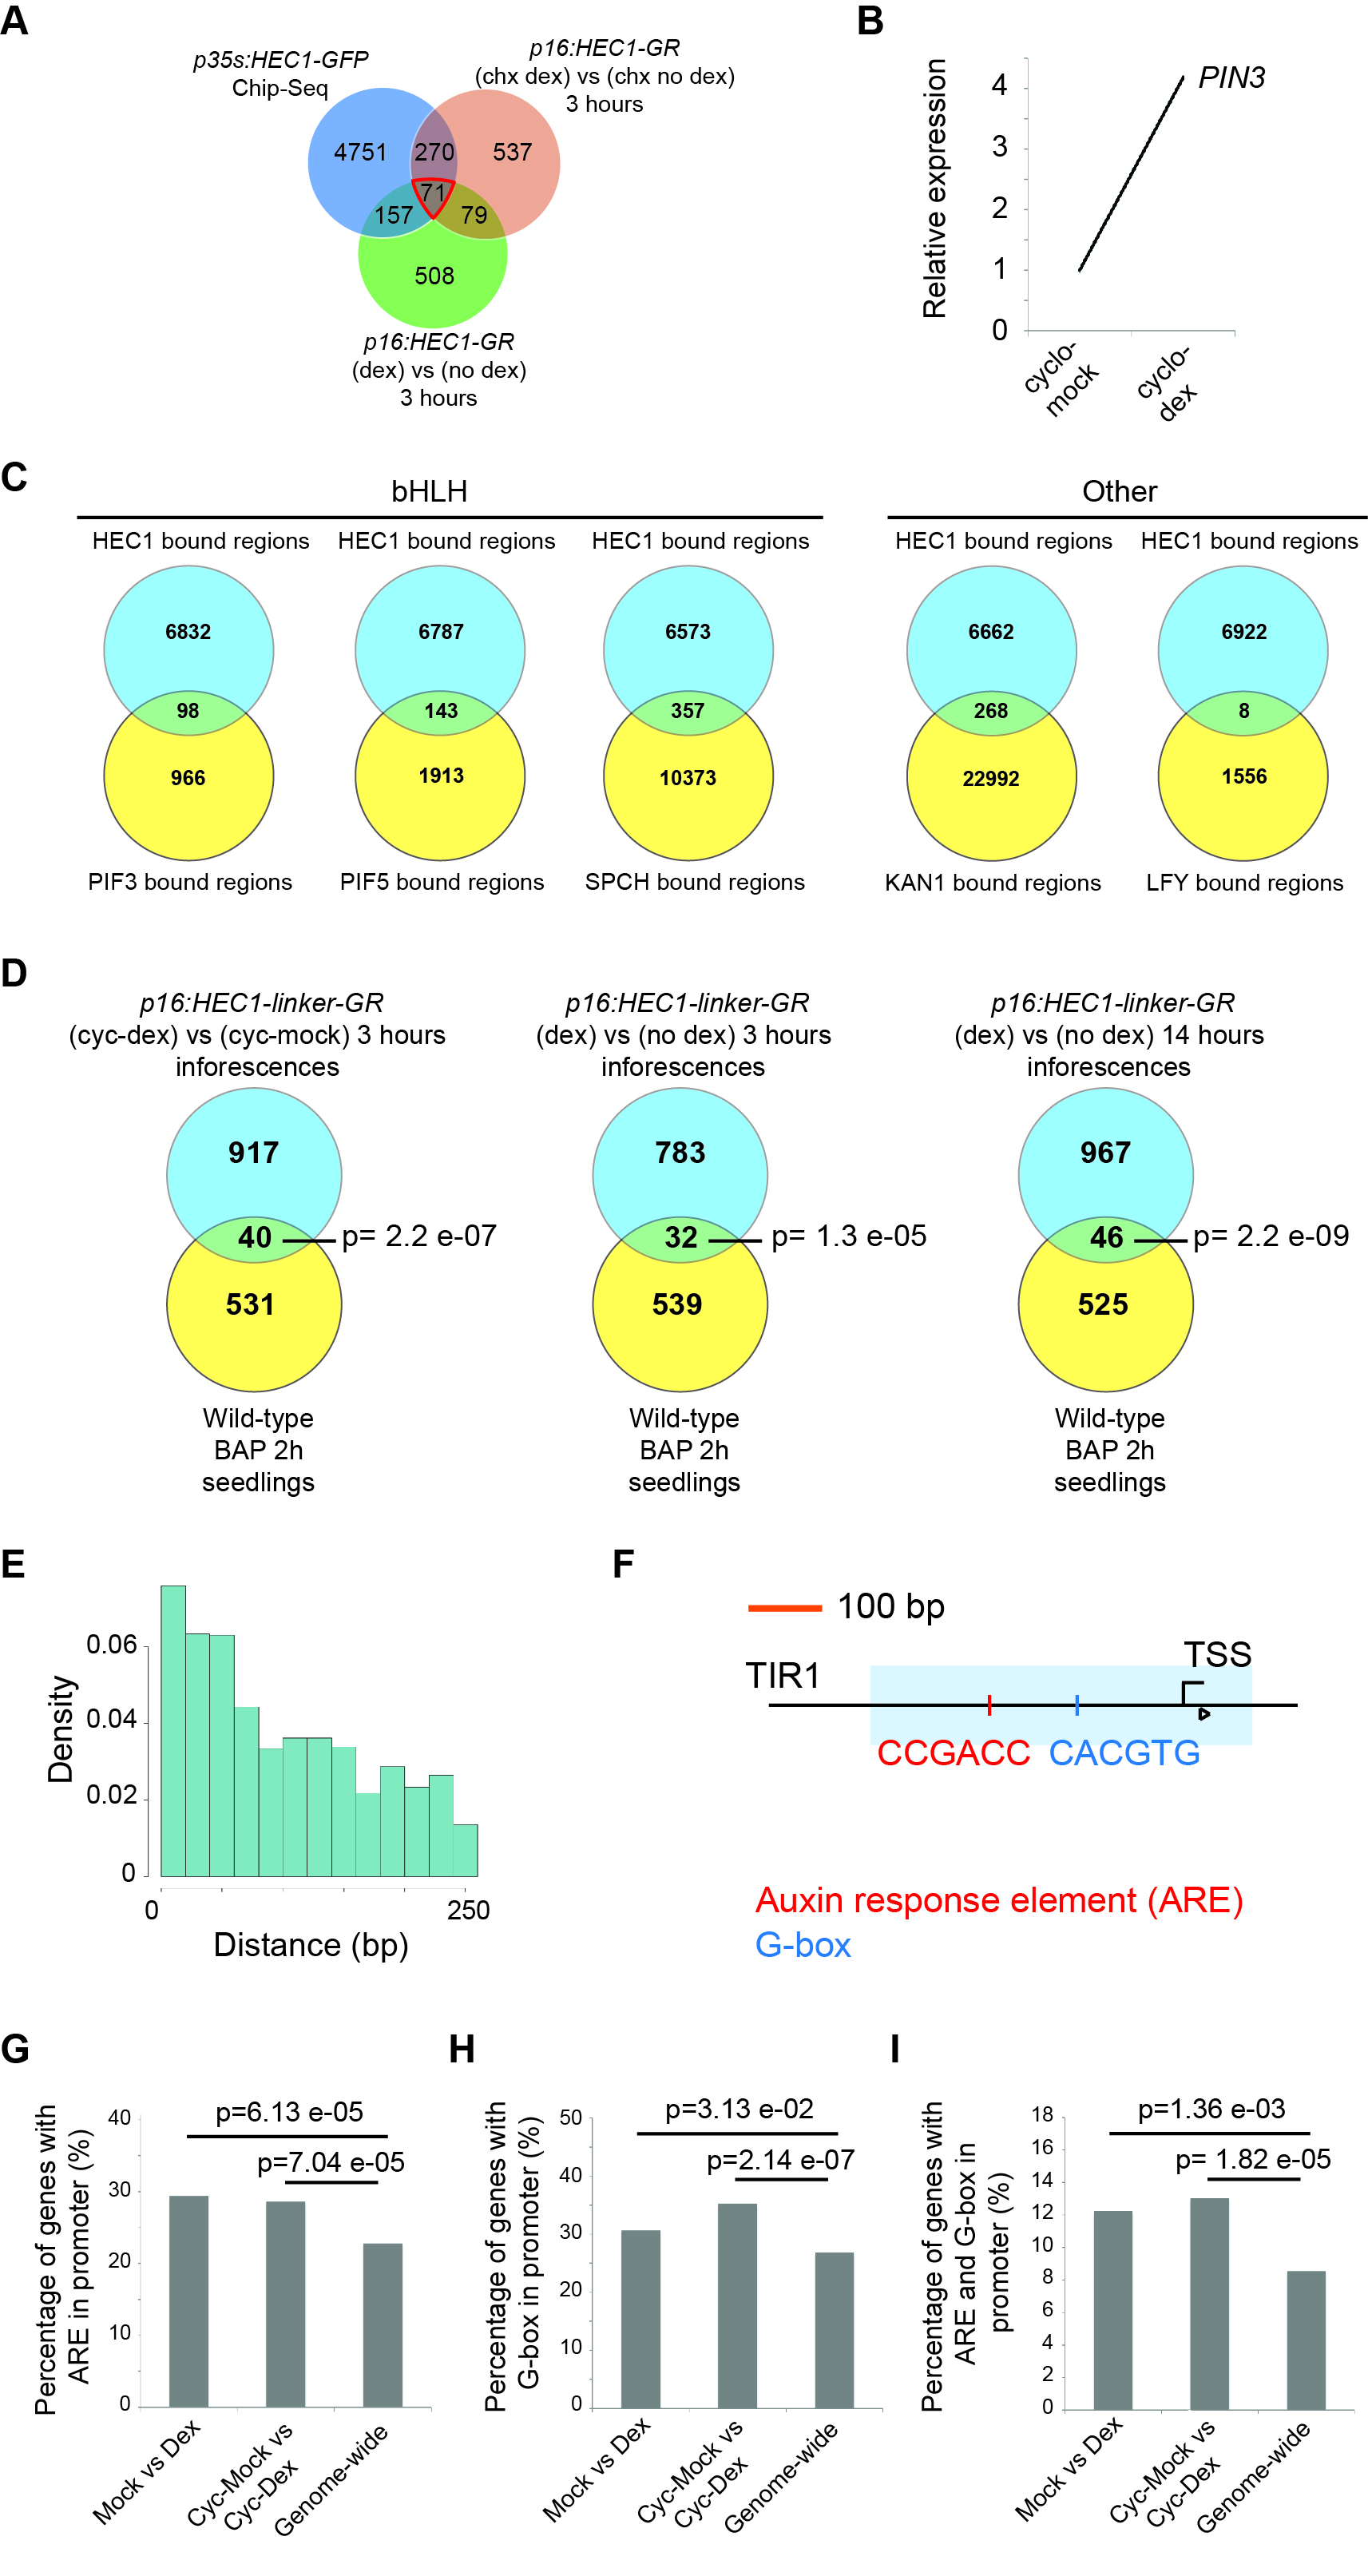

Supplement: supp [file elife-30135-supp-v1.zip › elife_poa_e30135_Figure_7_figure_supplement_1.jpg]

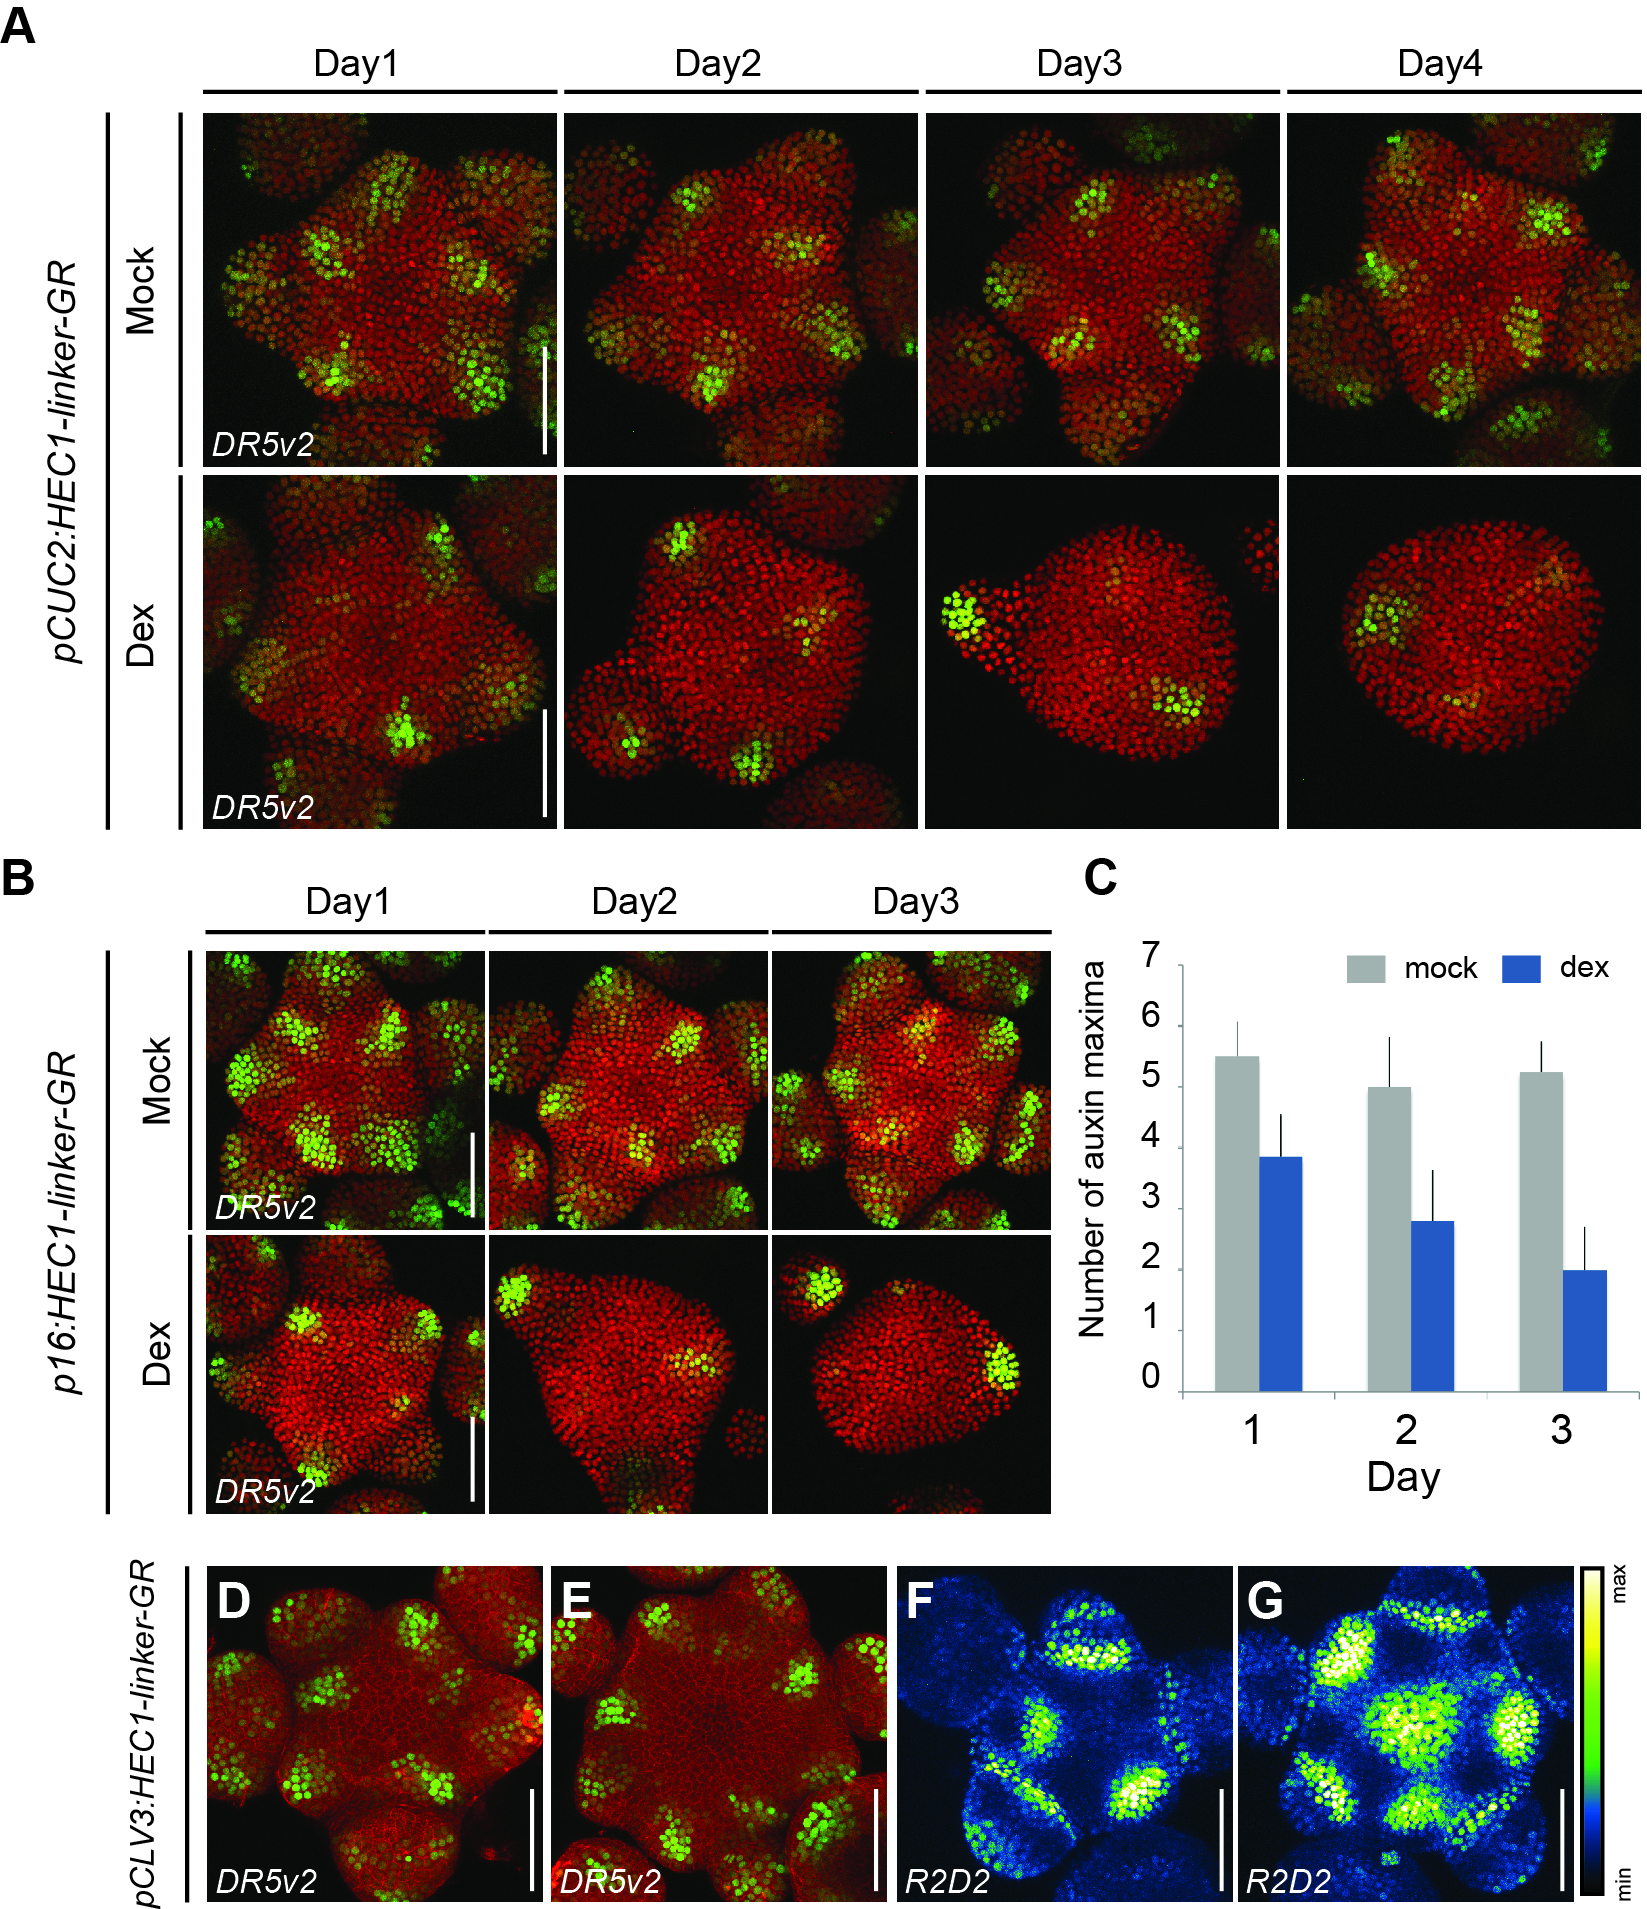

Supplement: supp [file elife-30135-supp-v1.zip › elife_poa_e30135_Figure_6_figure_supplement_2.jpg]

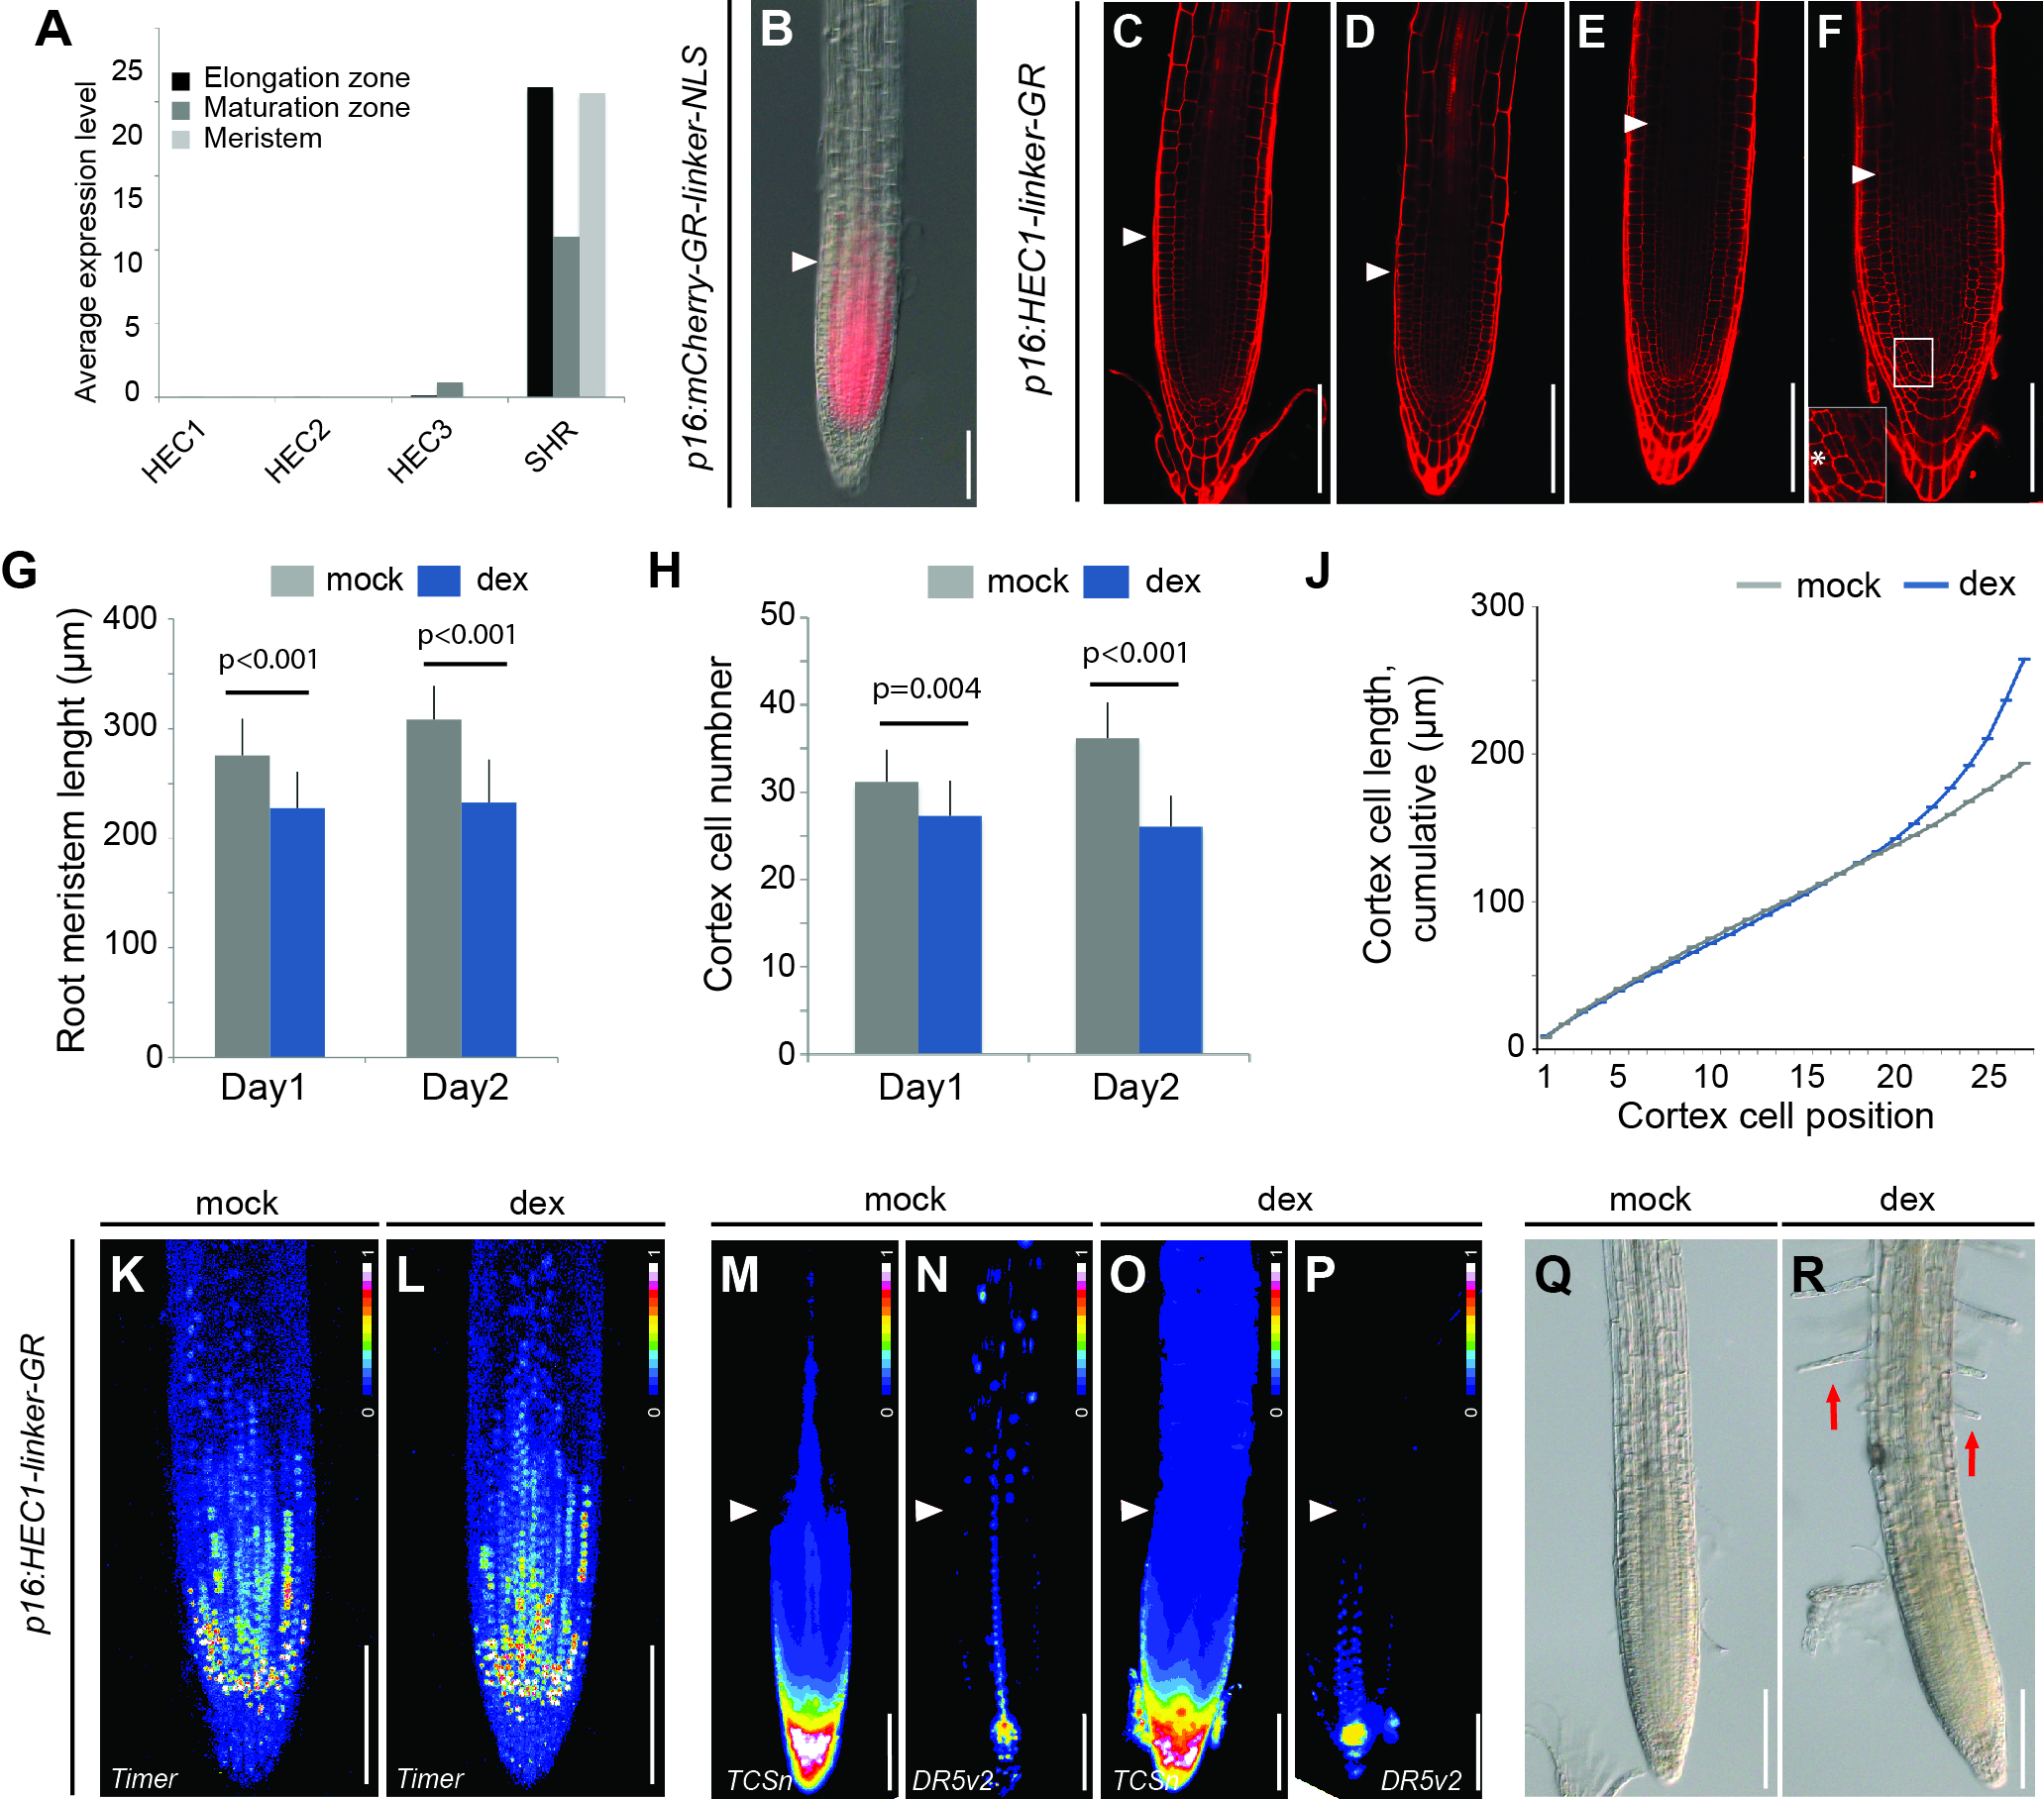

Supplement: supp [file elife-30135-supp-v1.zip › elife_poa_e30135_Figure_6_figure_supplement_3.jpg]

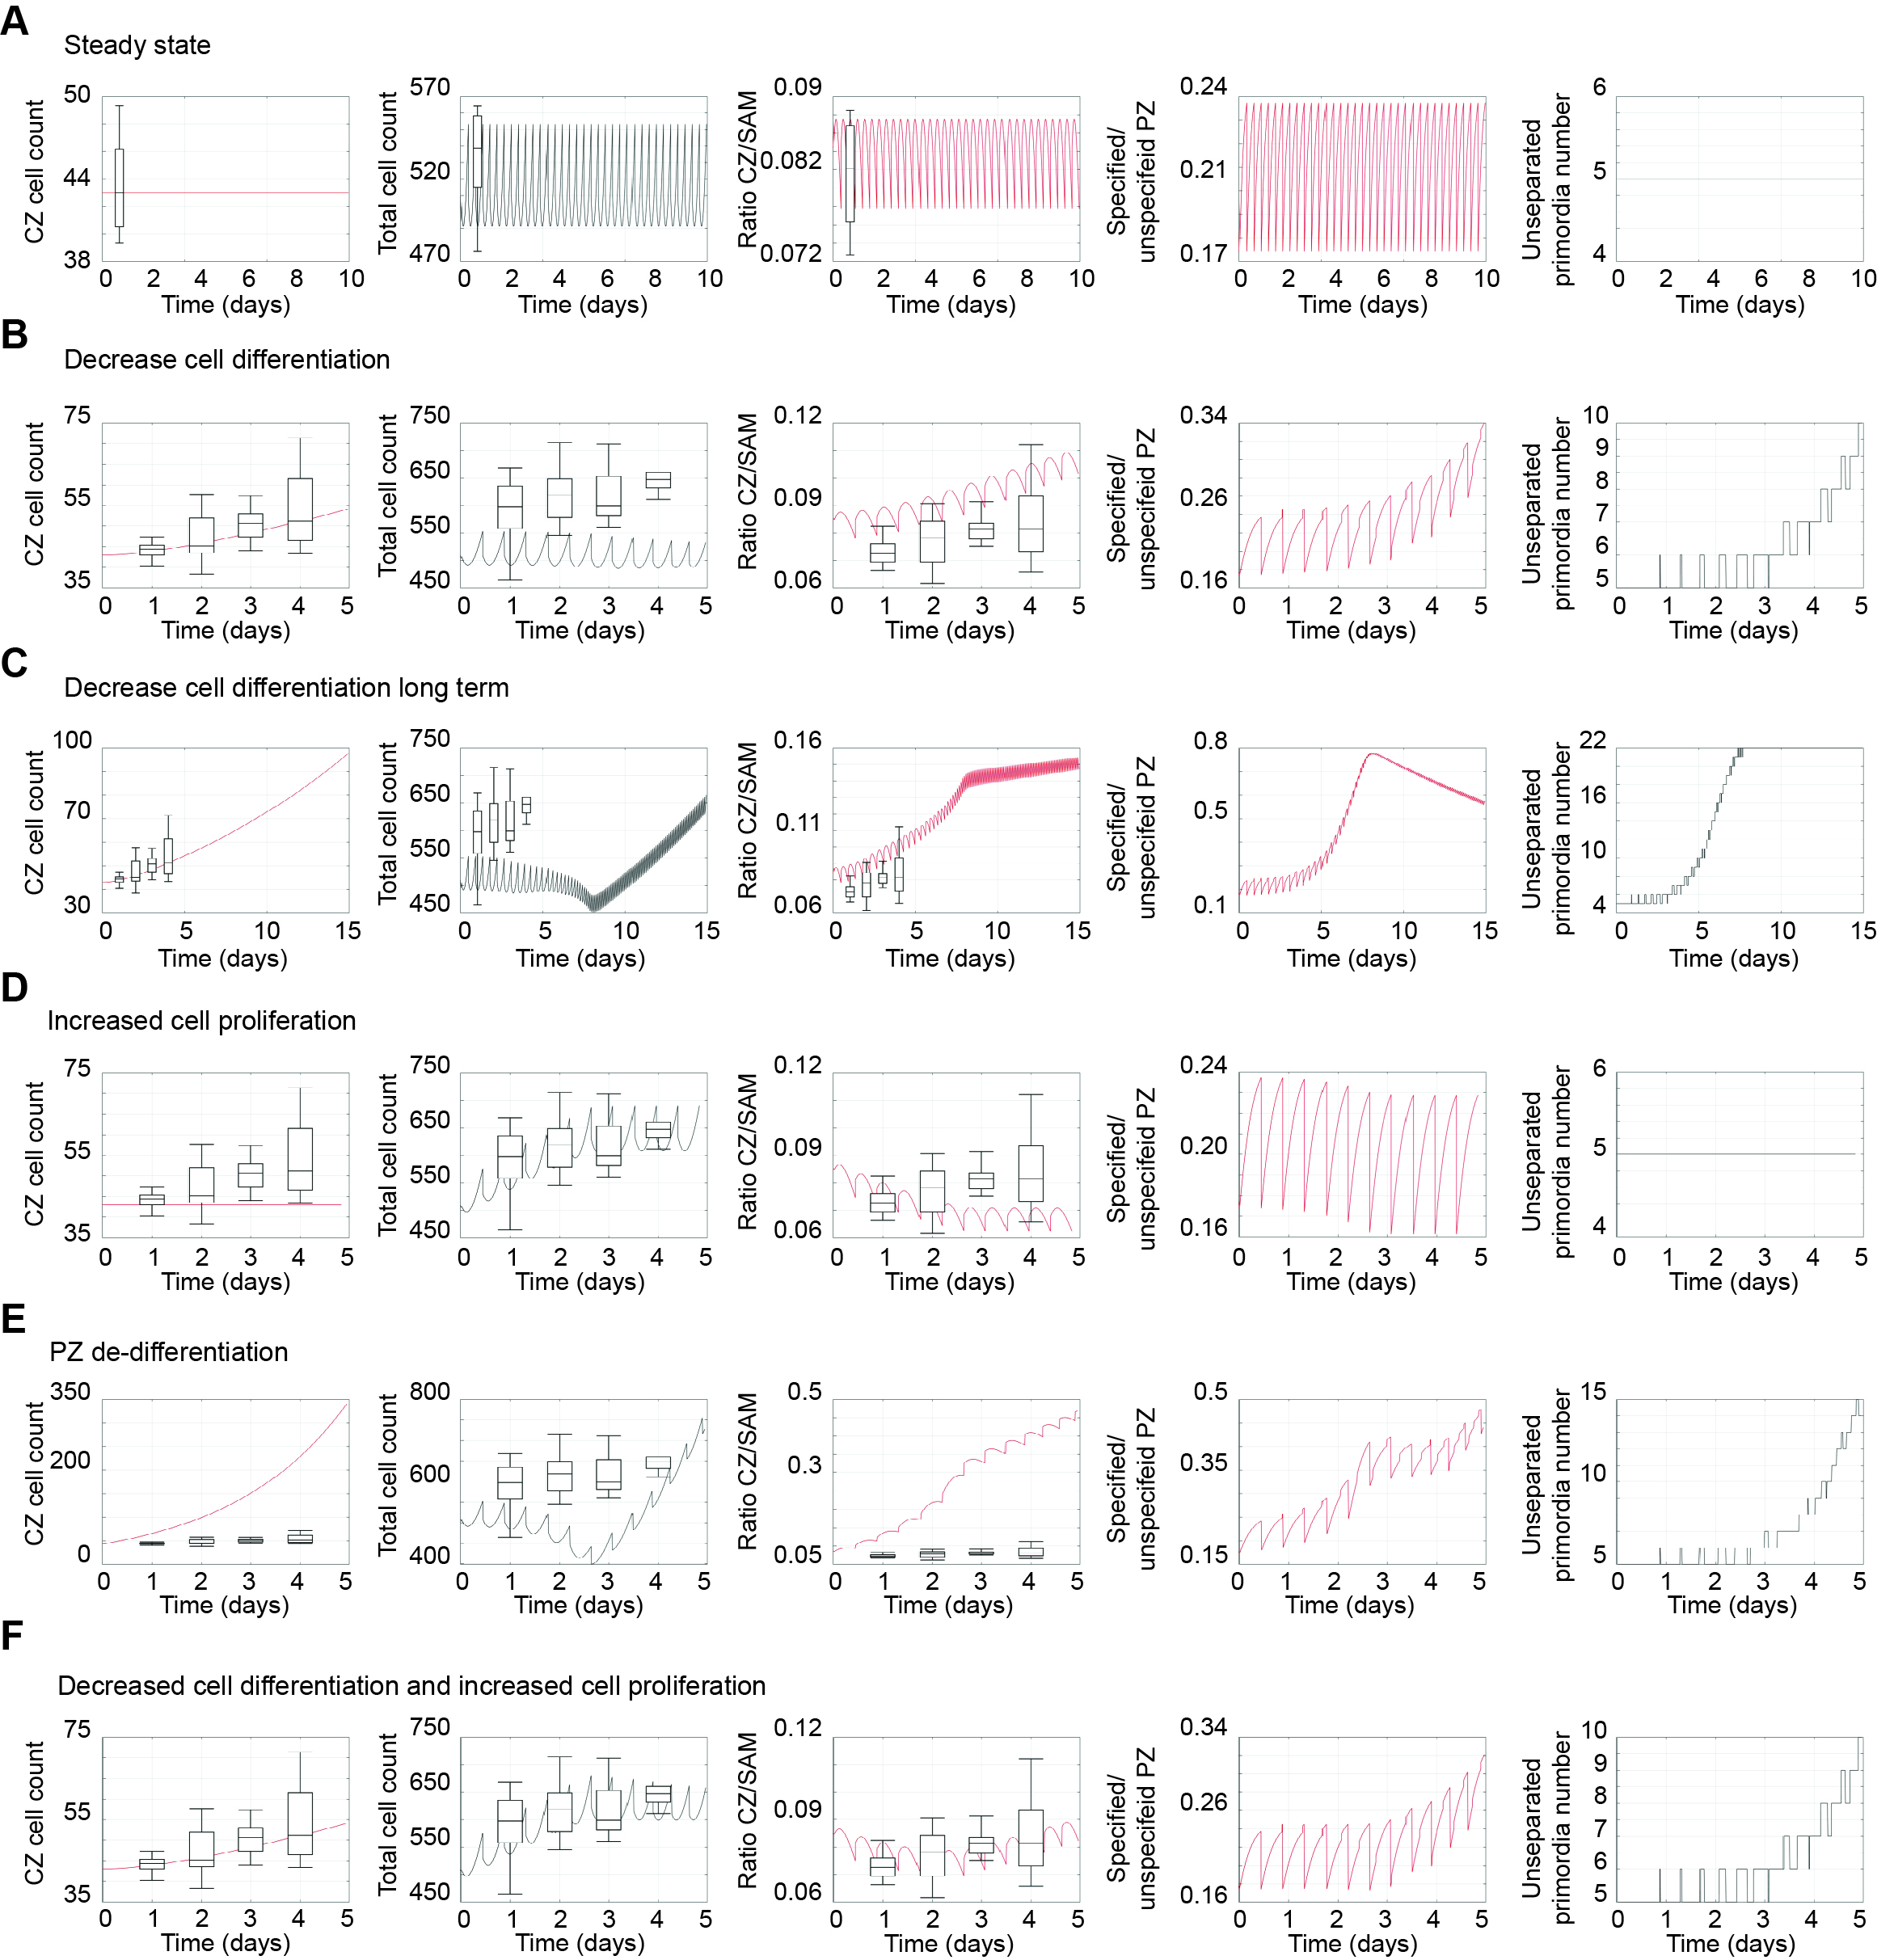

Supplement: supp [file elife-30135-supp-v1.zip › elife_poa_e30135_Figure_4_figure_supplement_1.jpg]

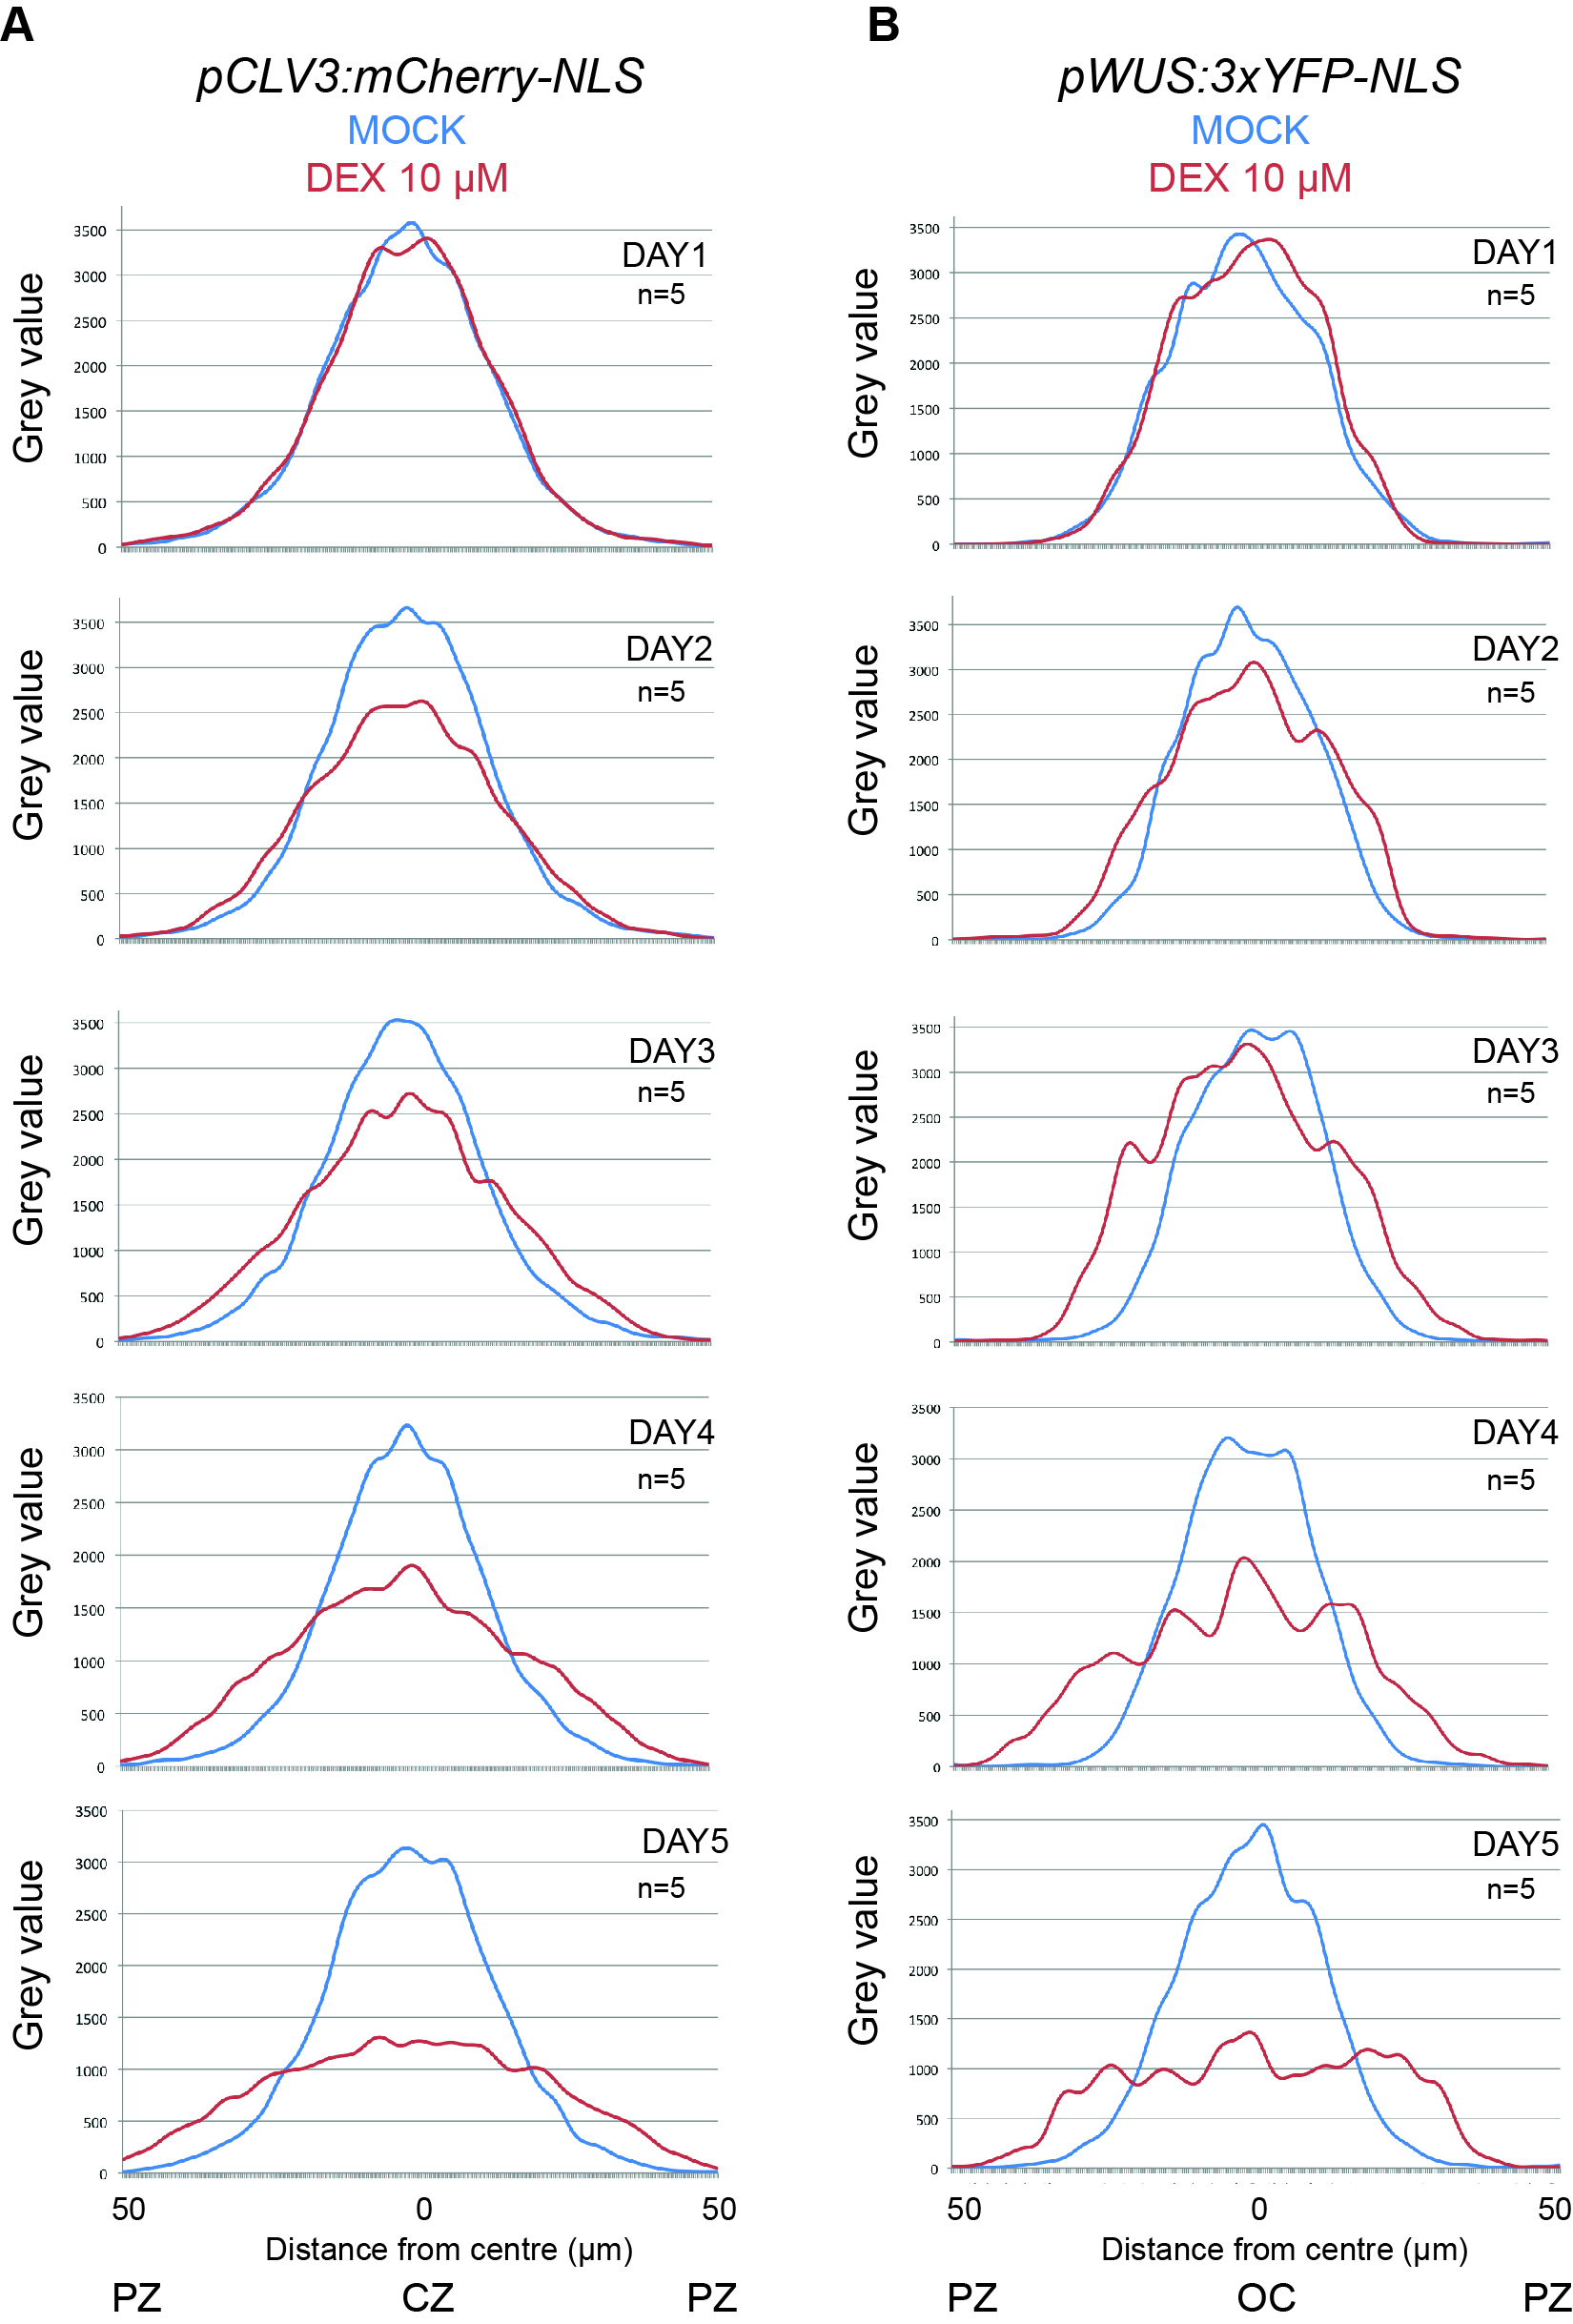

Supplement: supp [file elife-30135-supp-v1.zip › elife_poa_e30135_Figure_2_figure_supplement_4.jpg]

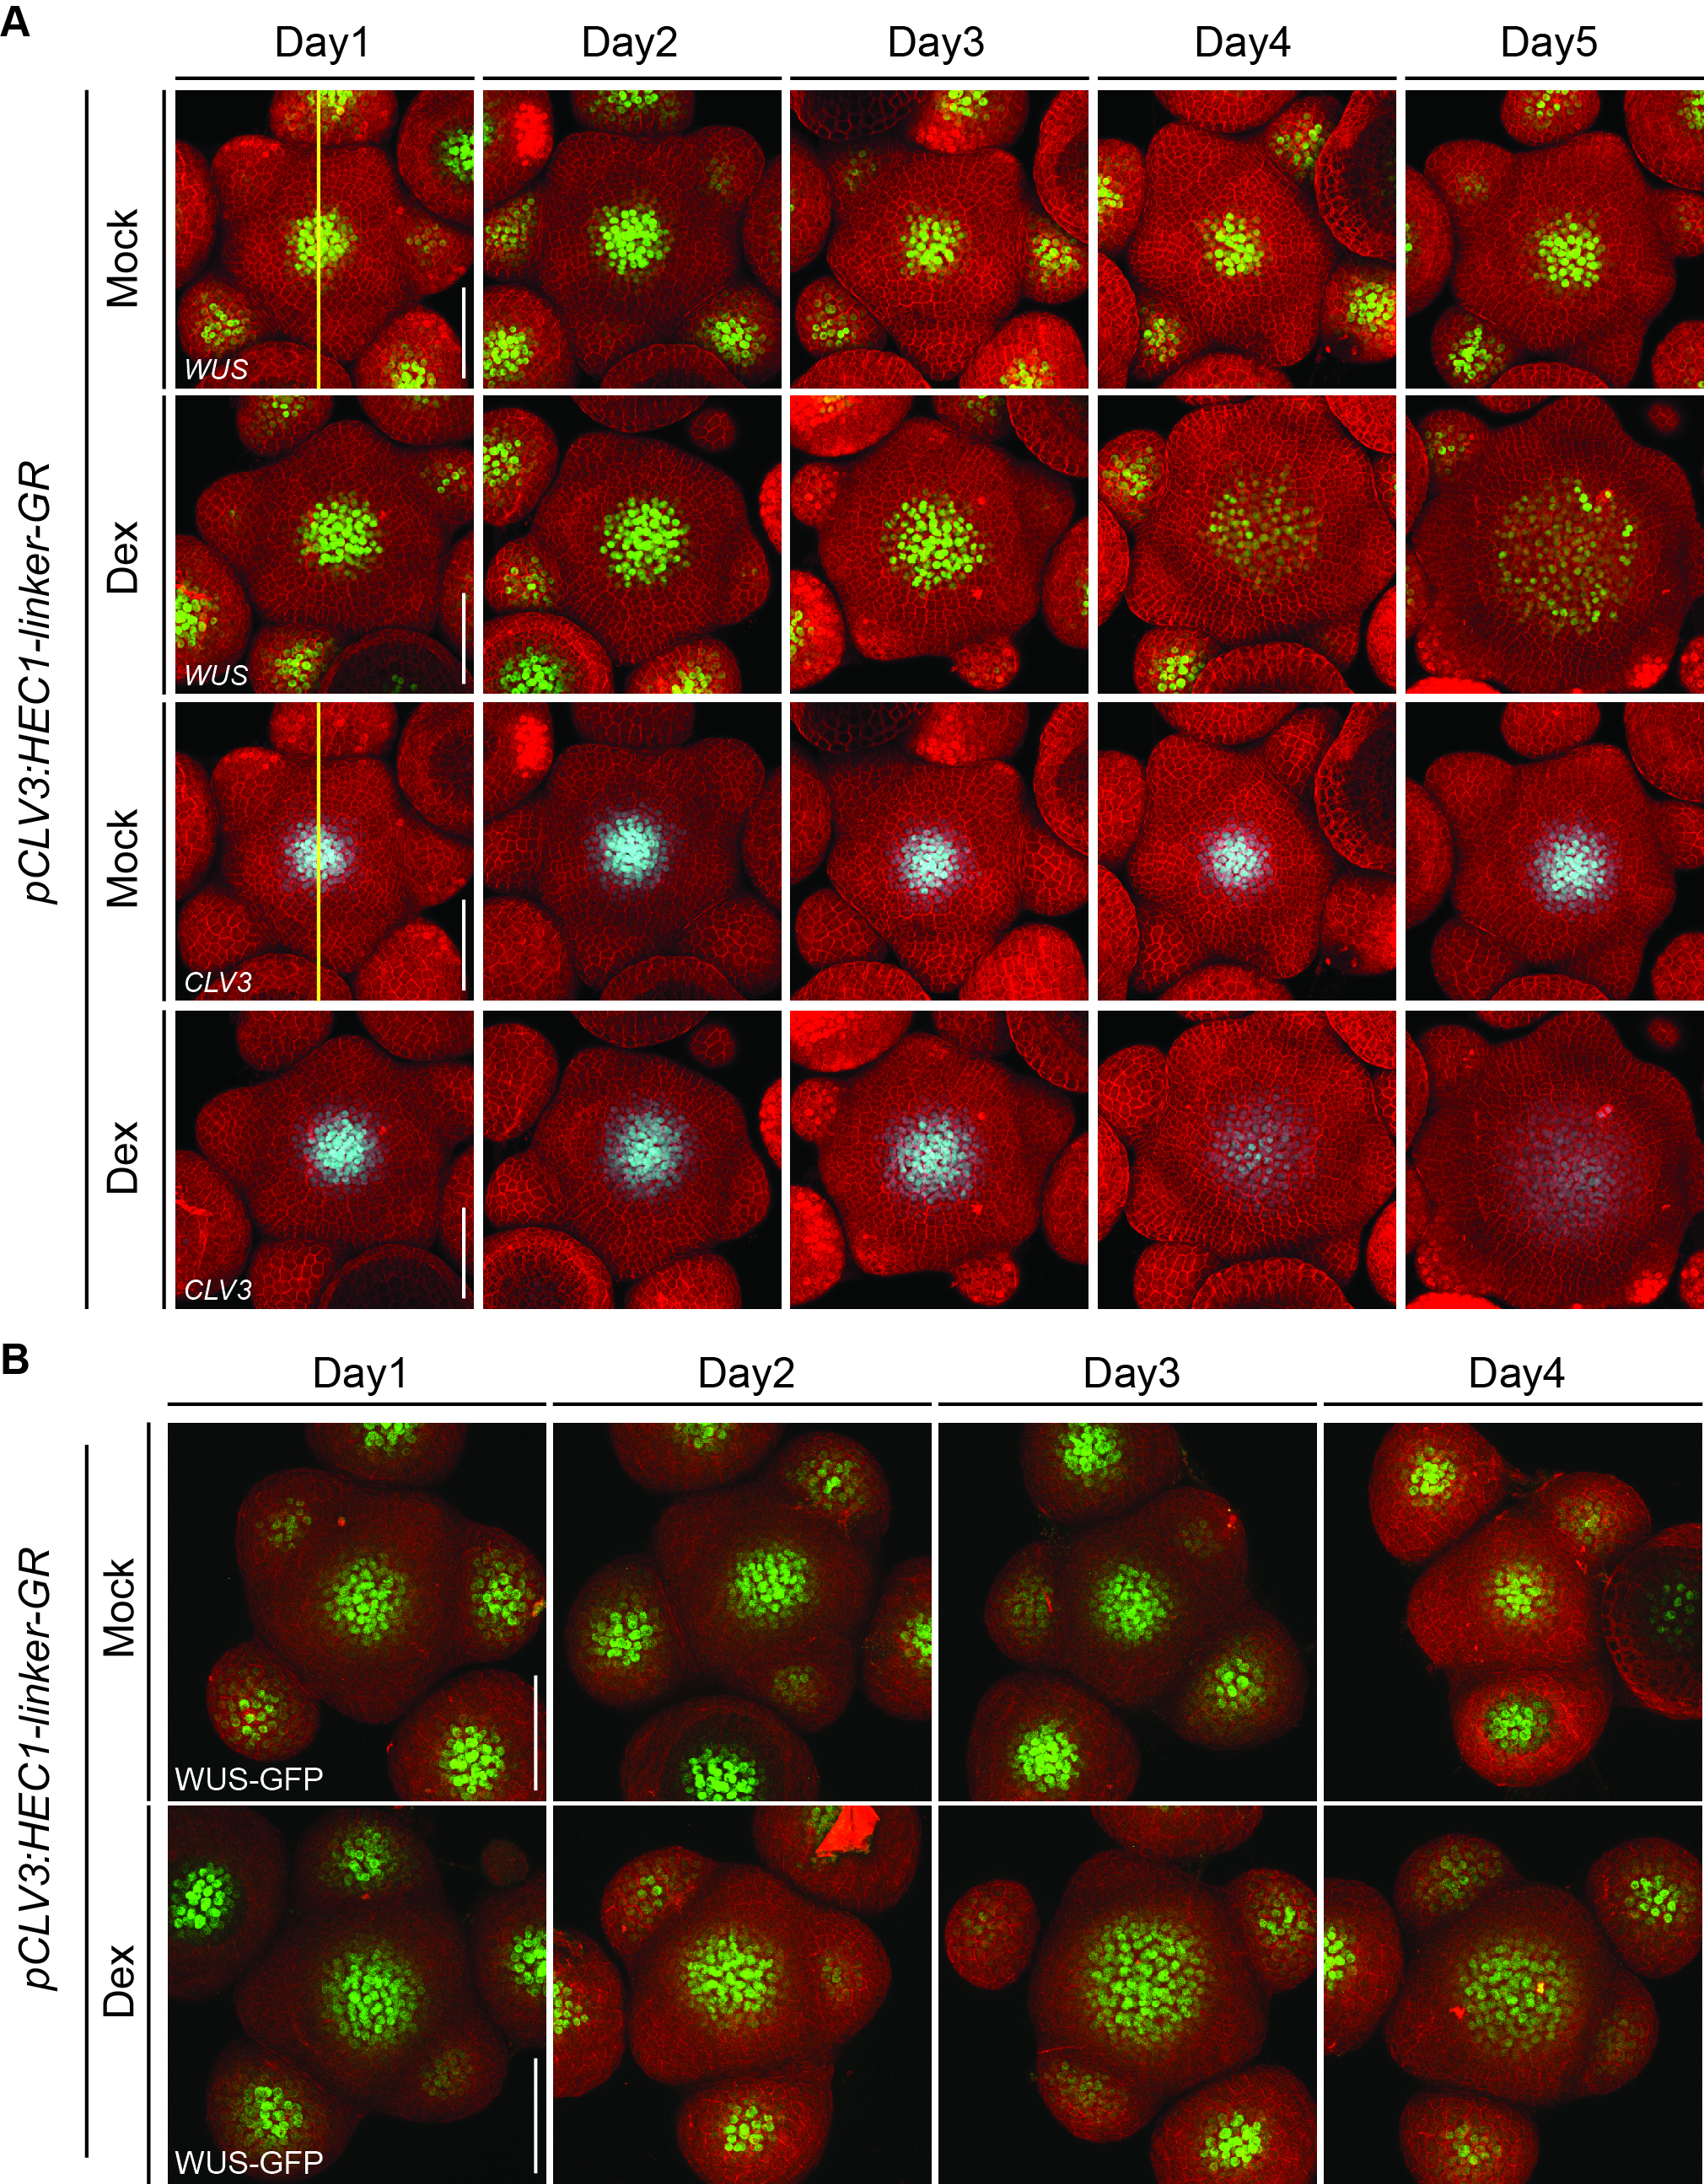

Supplement: supp [file elife-30135-supp-v1.zip › elife_poa_e30135_Figure_2_figure_supplement_3.jpg]

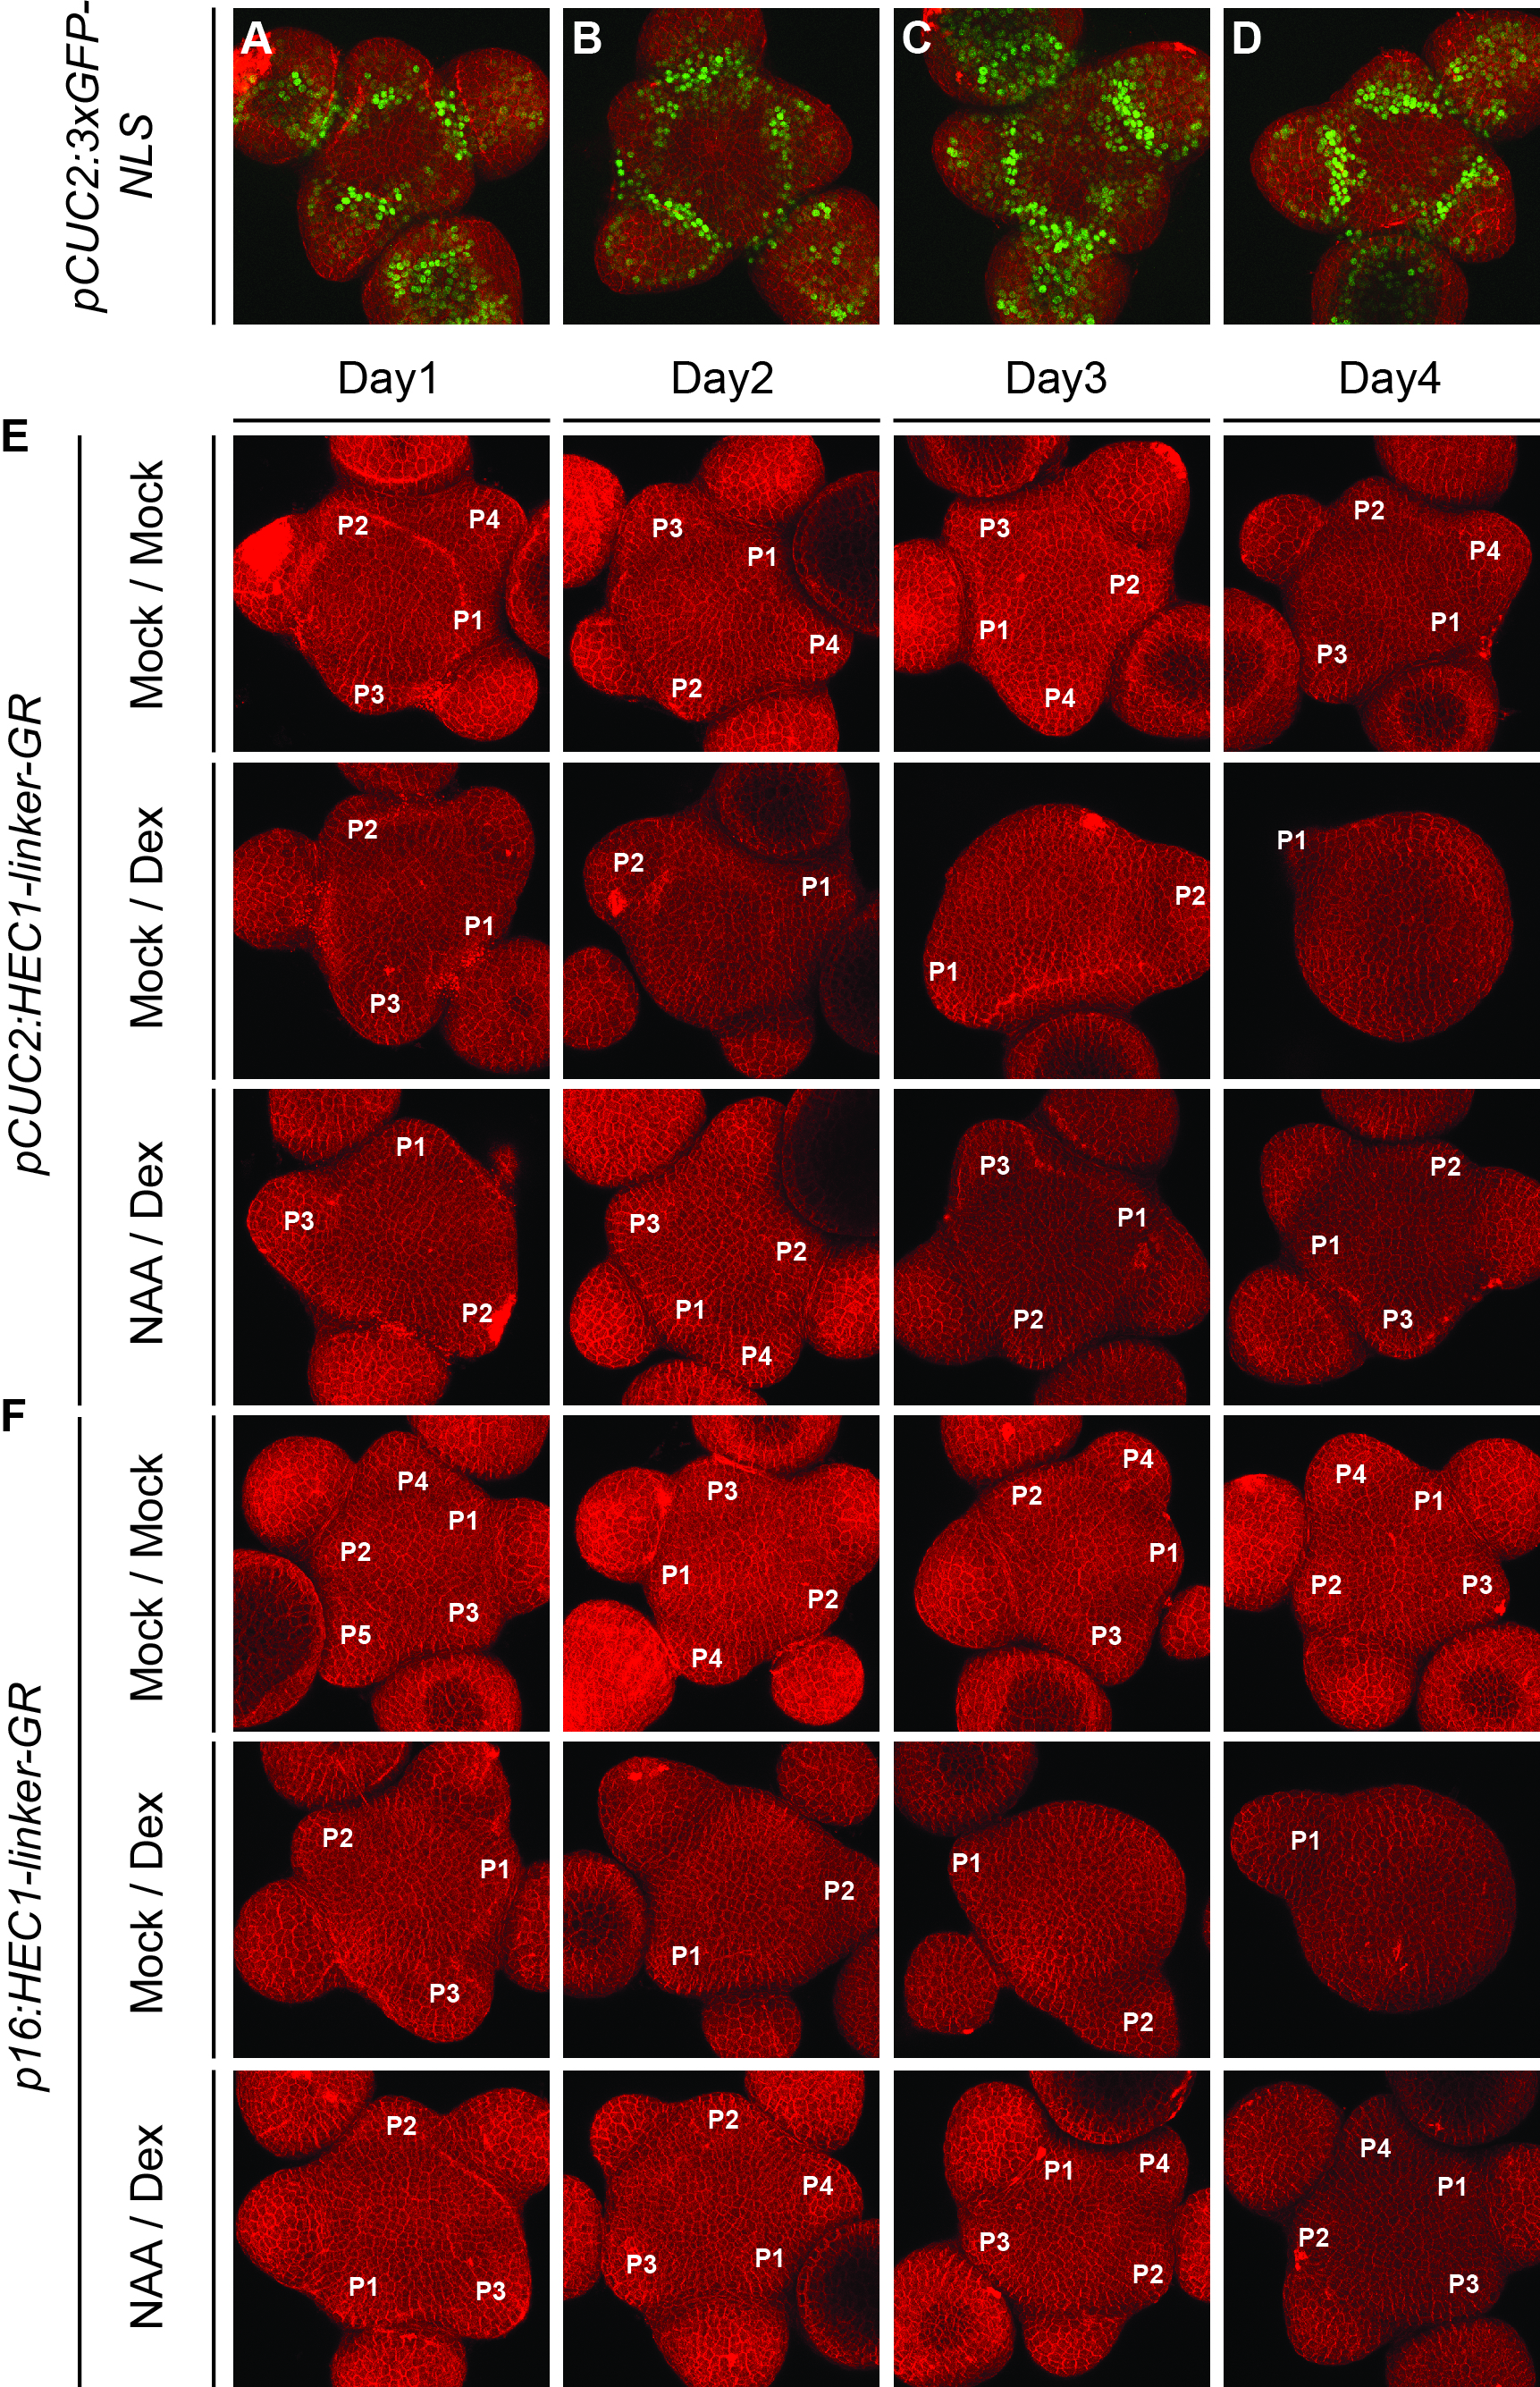

Supplement: supp [file elife-30135-supp-v1.zip › elife_poa_e30135_Figure_9_figure_supplement_1.jpg]

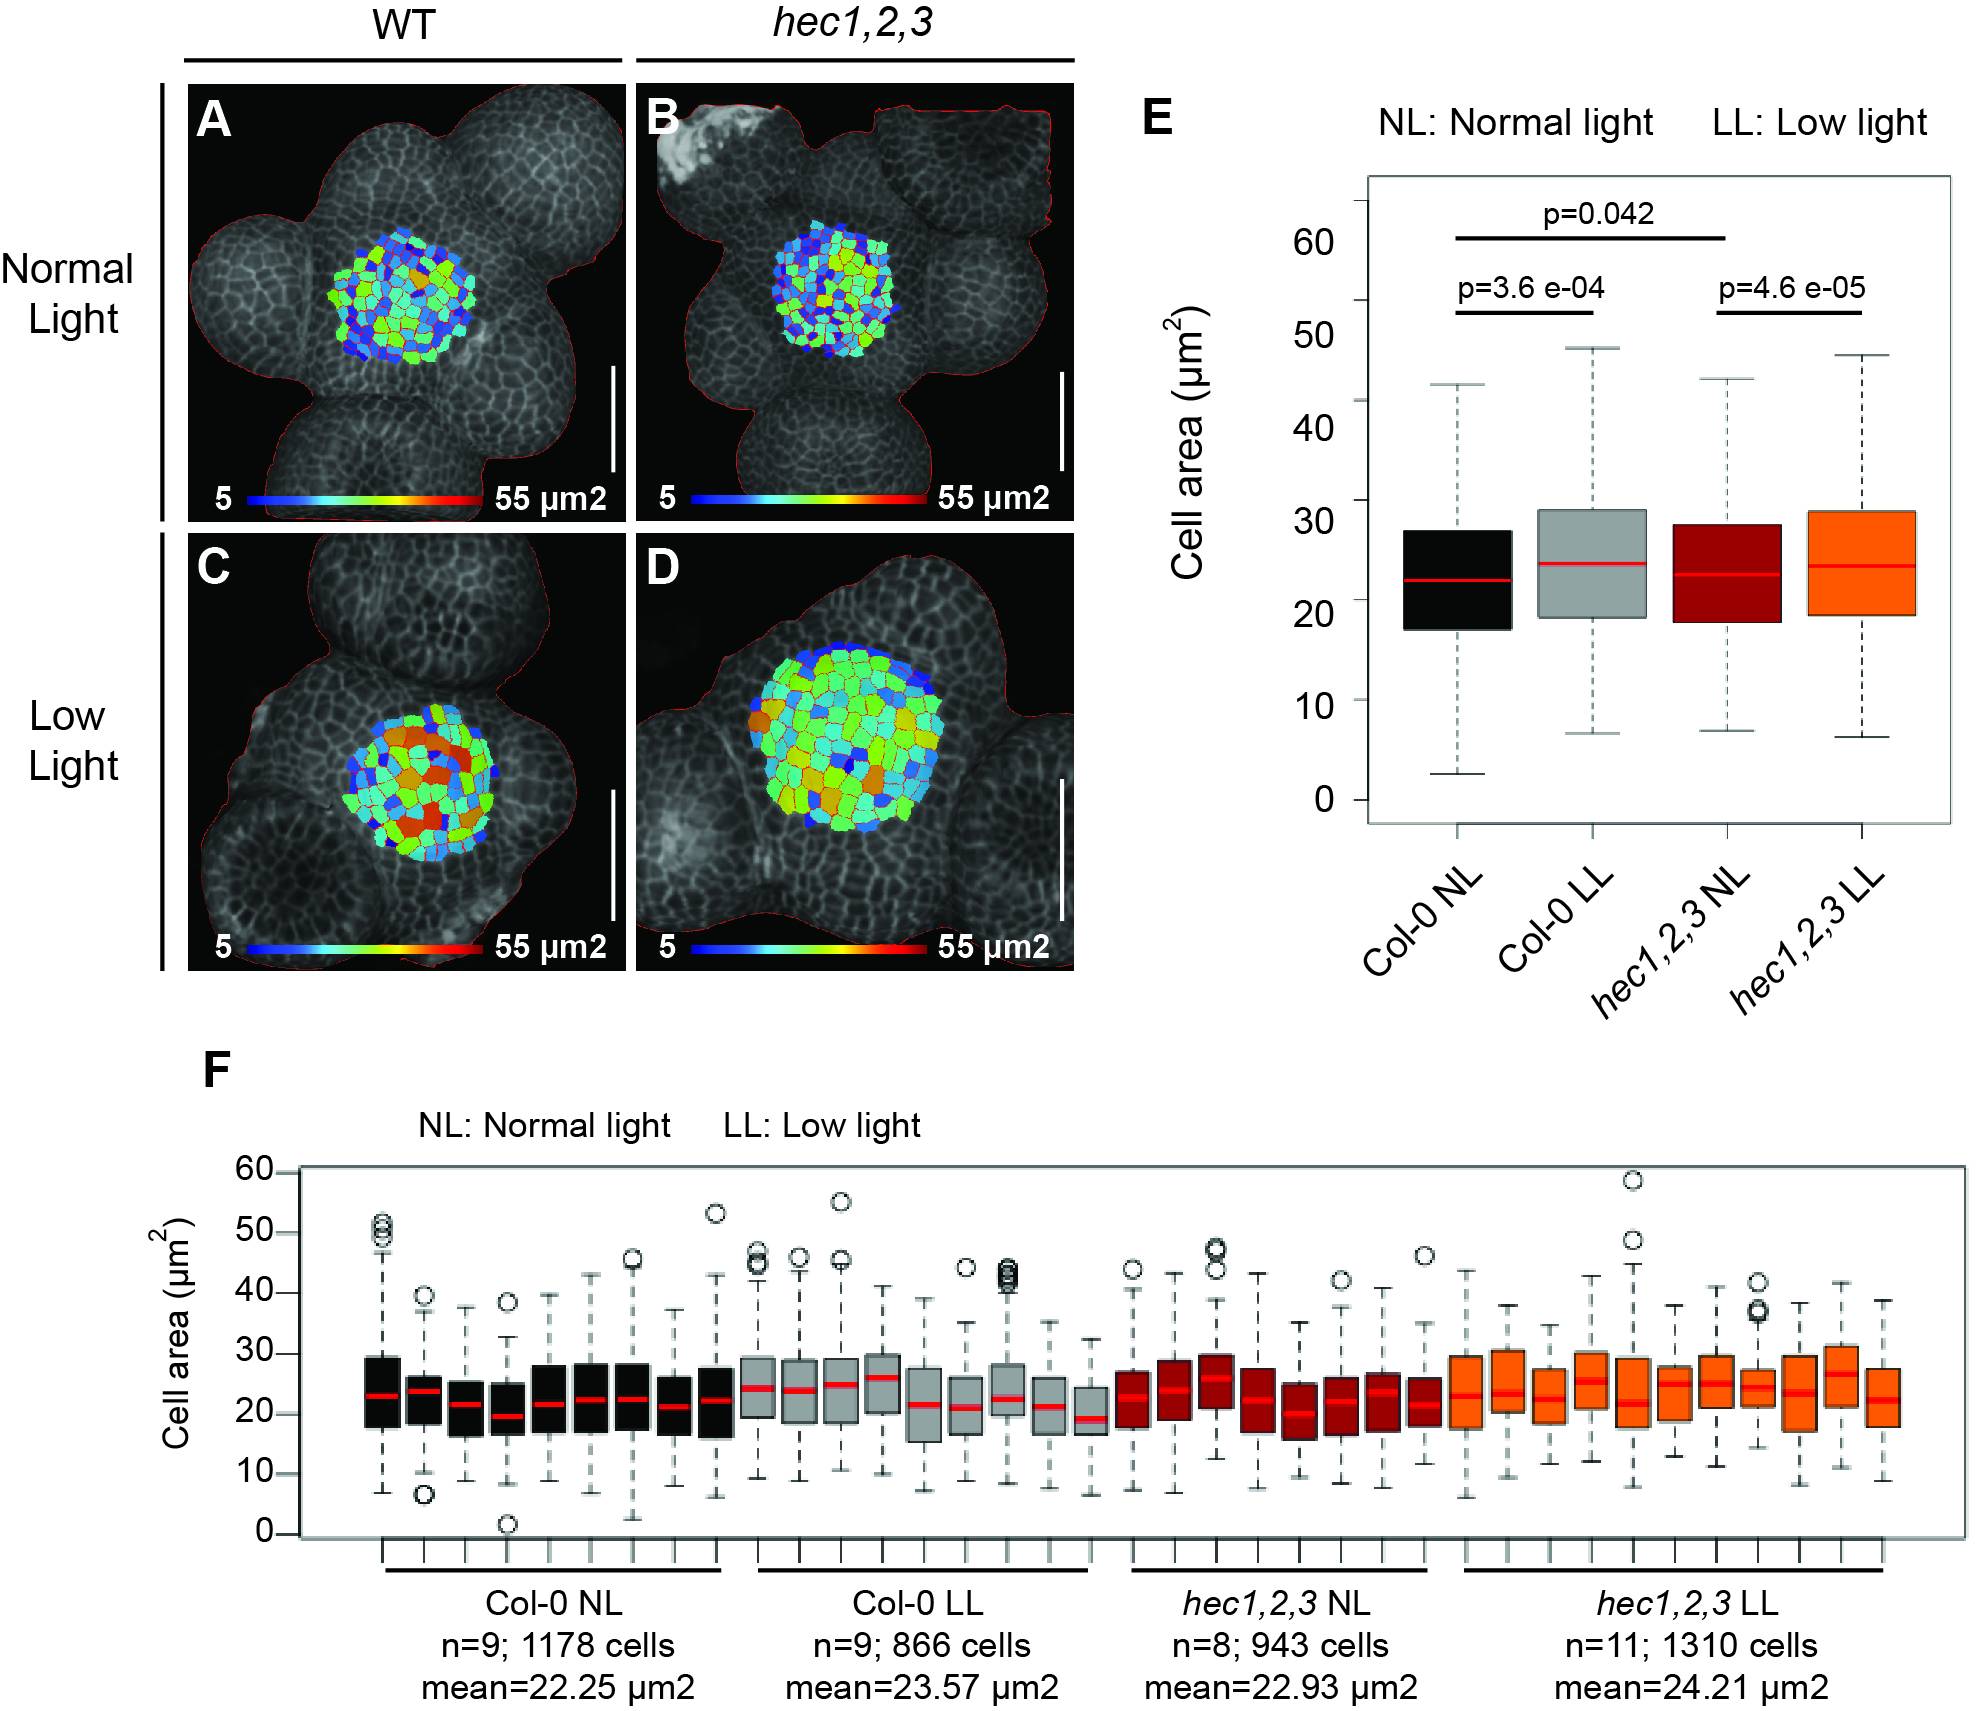

Supplement: supp [file elife-30135-supp-v1.zip › elife_poa_e30135_Figure_10_figure_supplement_1.jpg]

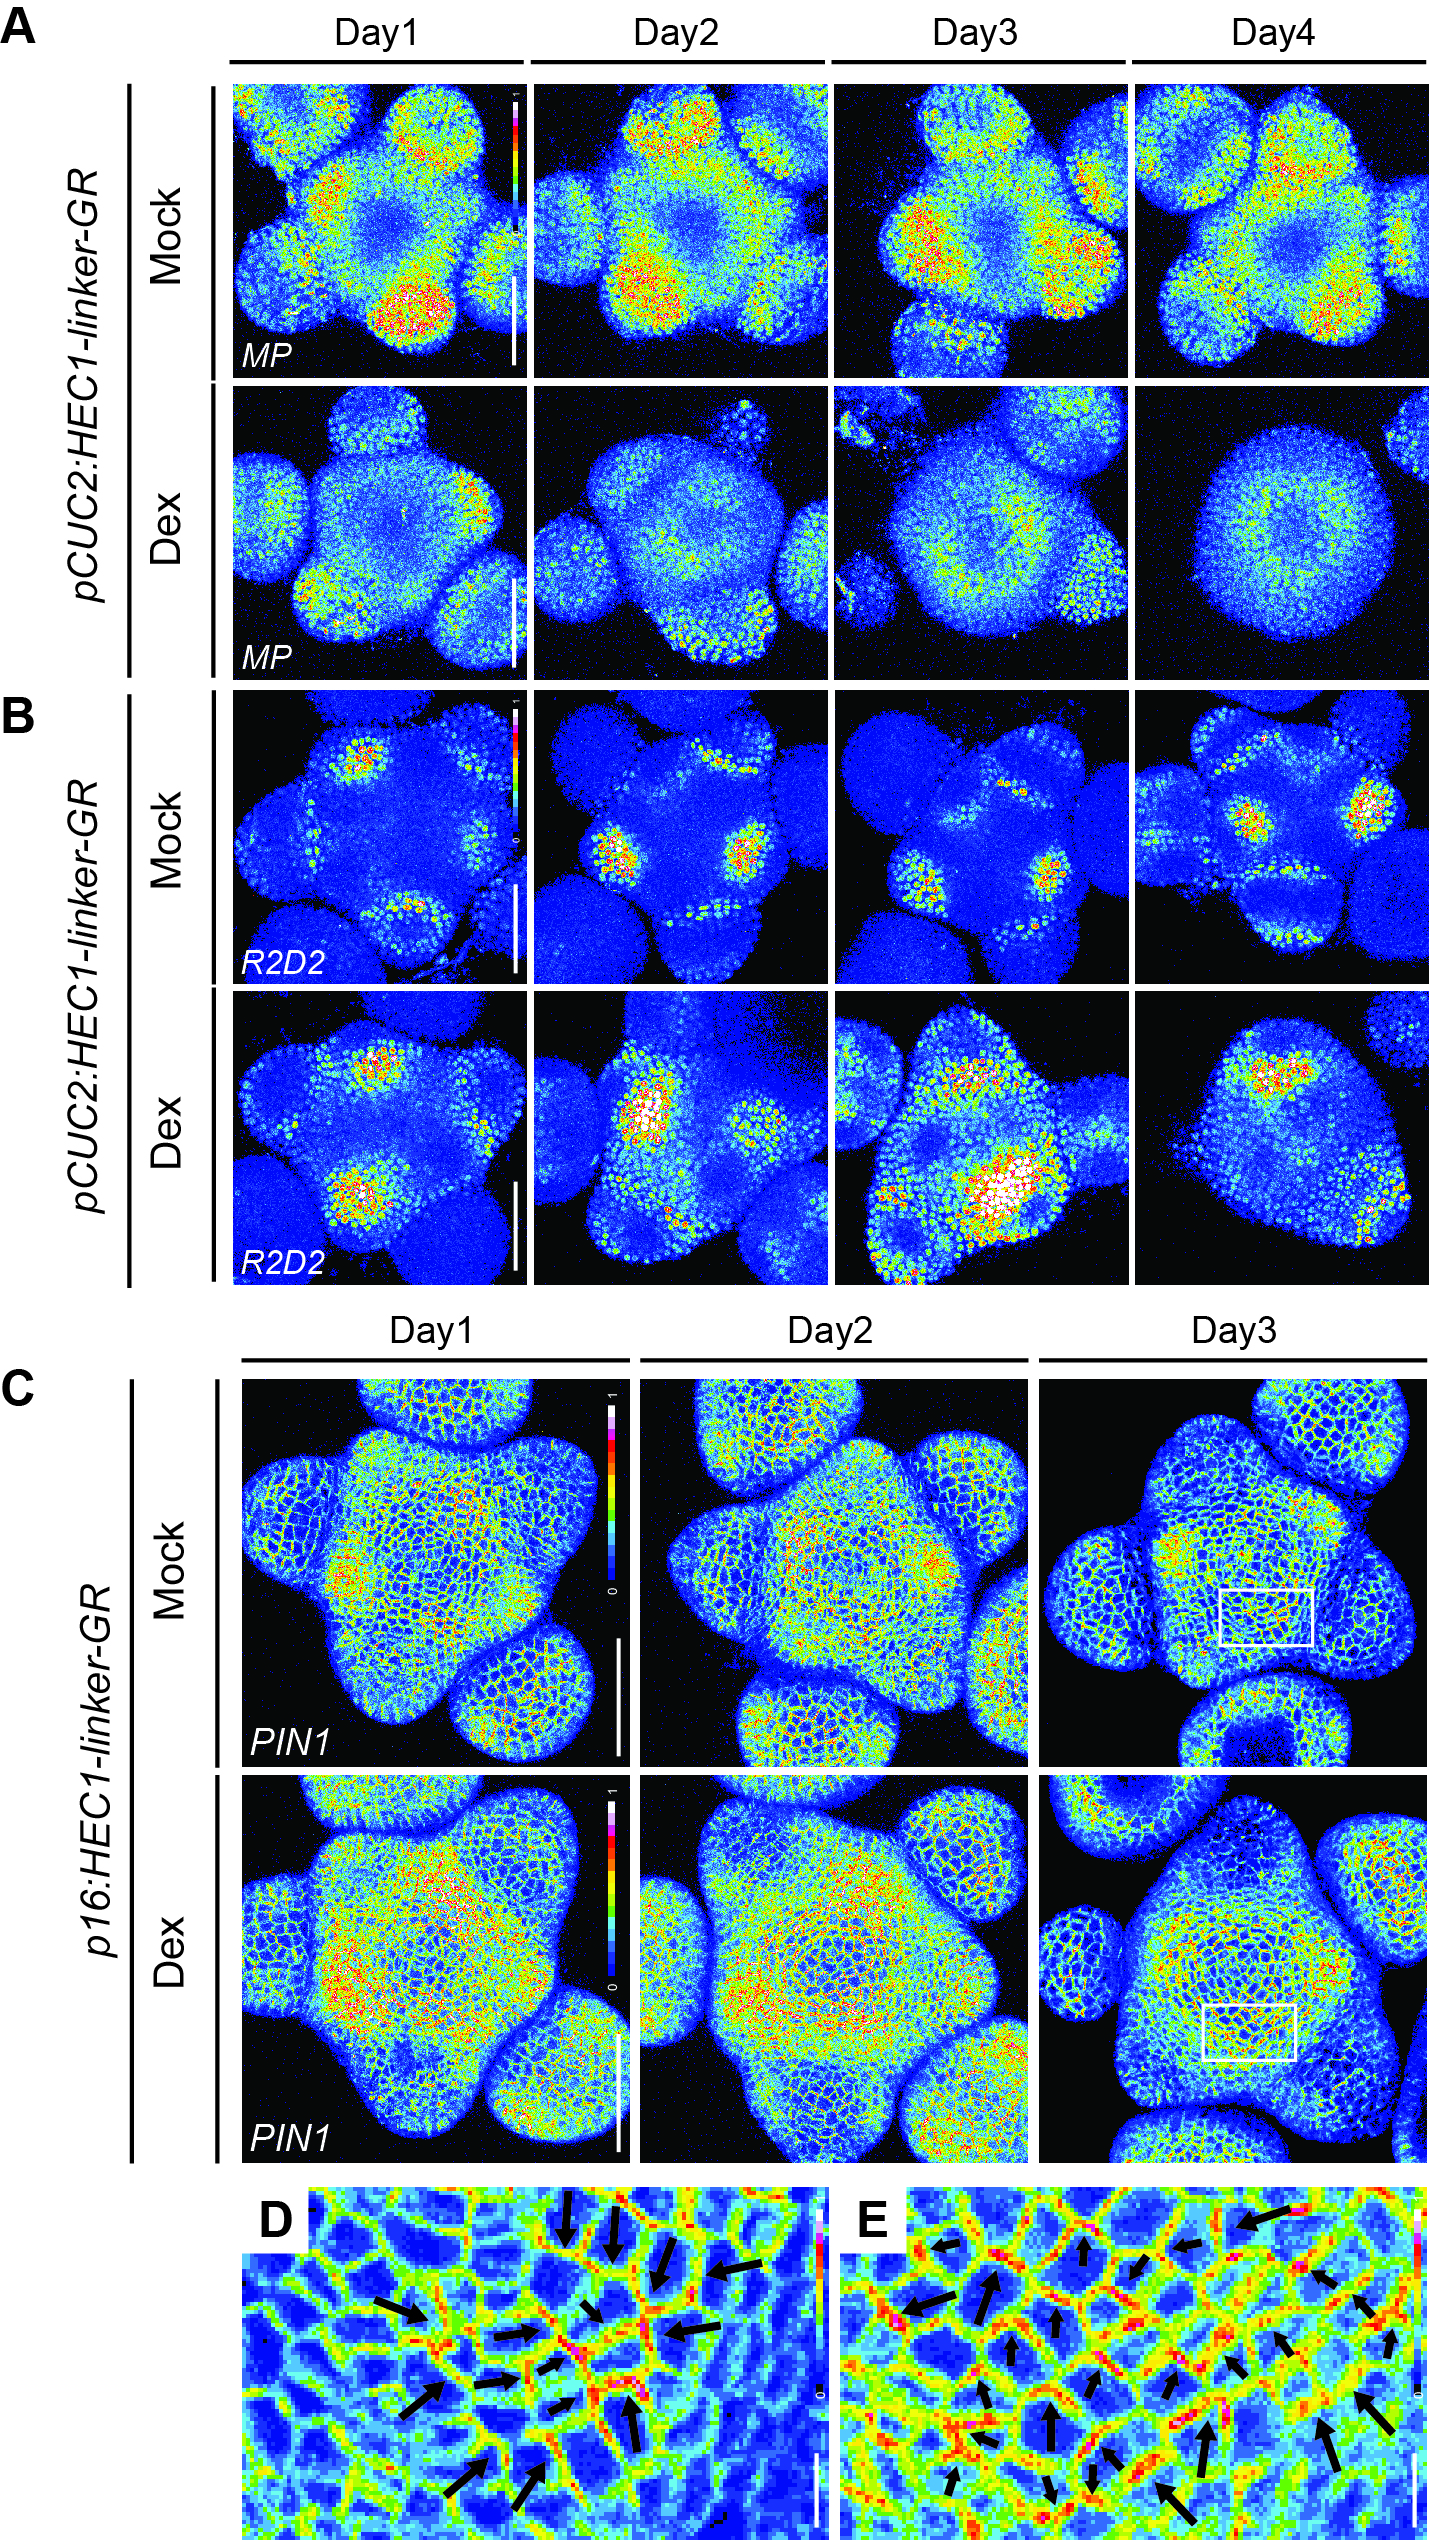

Supplement: supp [file elife-30135-supp-v1.zip › elife_poa_e30135_Figure_8_figure_supplement_1.jpg]

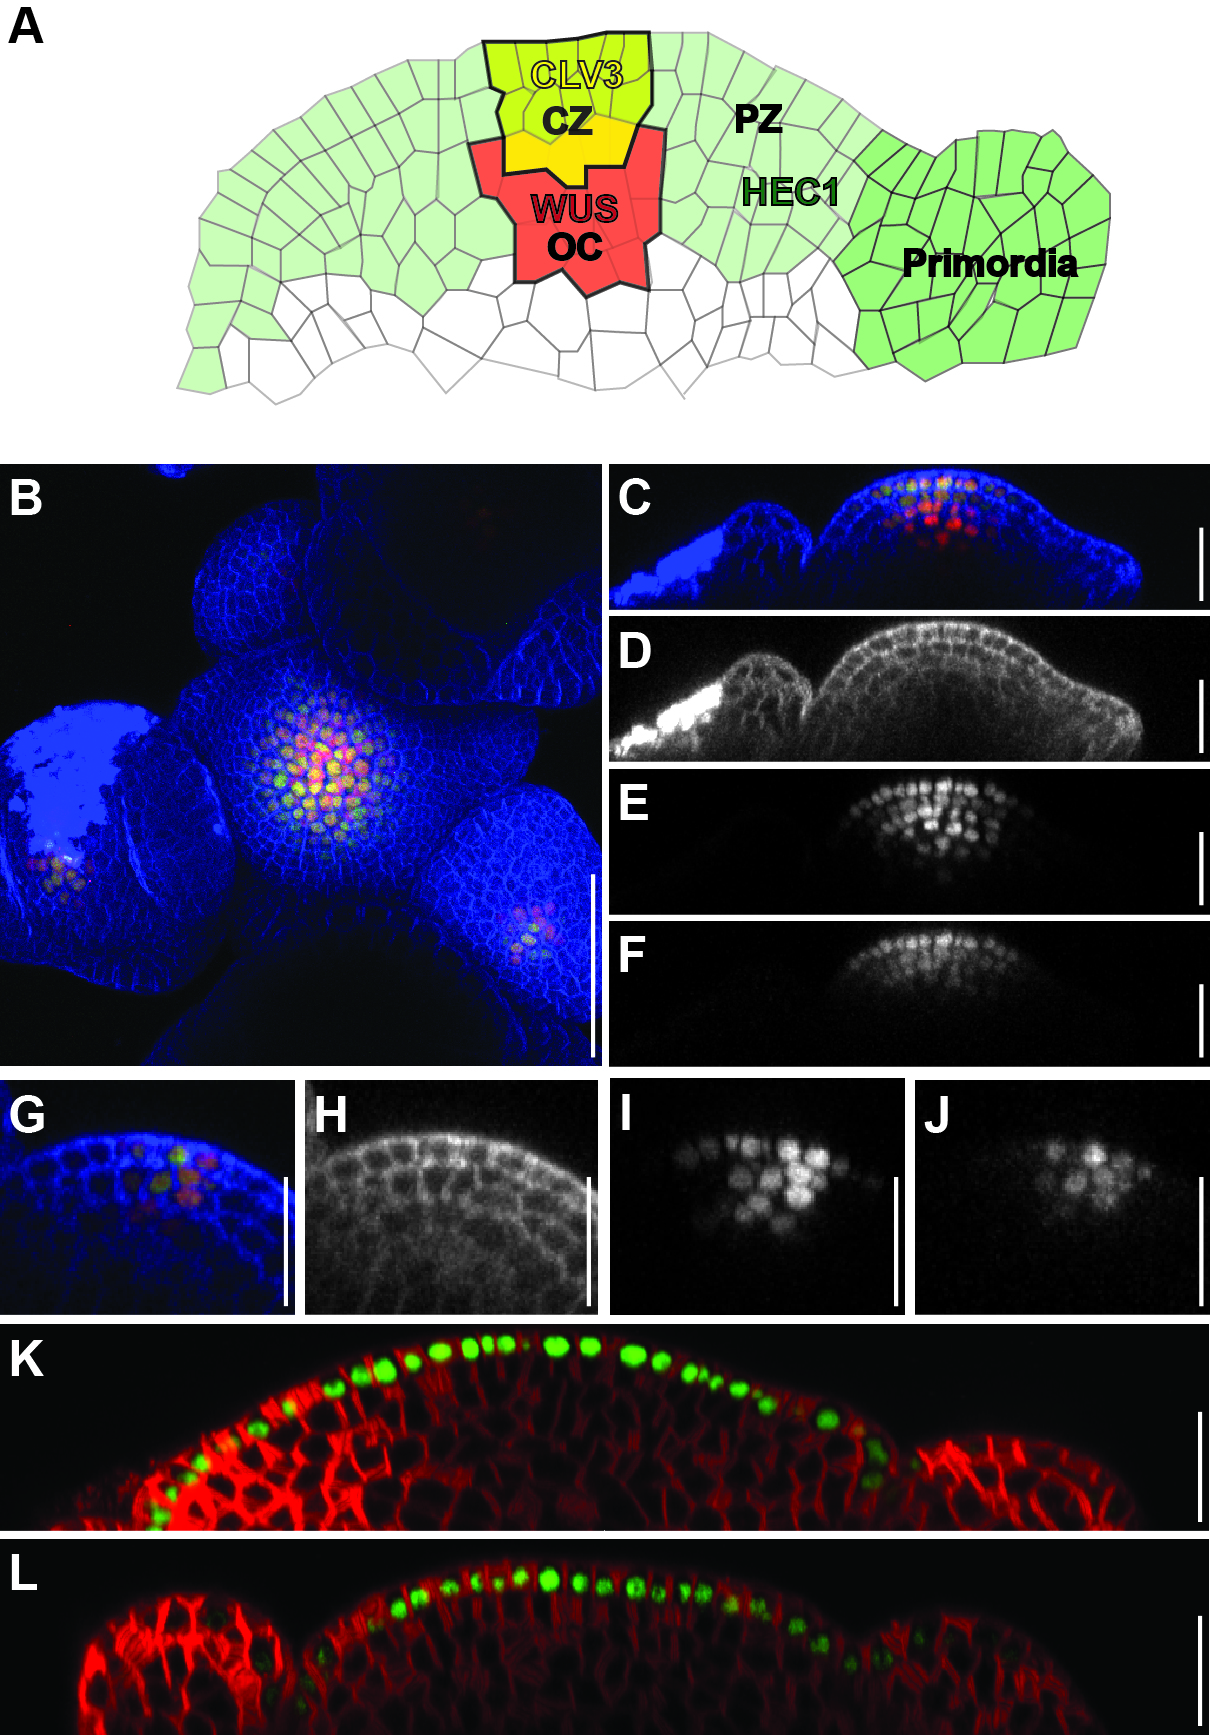

Supplement: supp [file elife-30135-supp-v1.zip › elife_poa_e30135_Figure_2_figure_supplement_1.jpg]

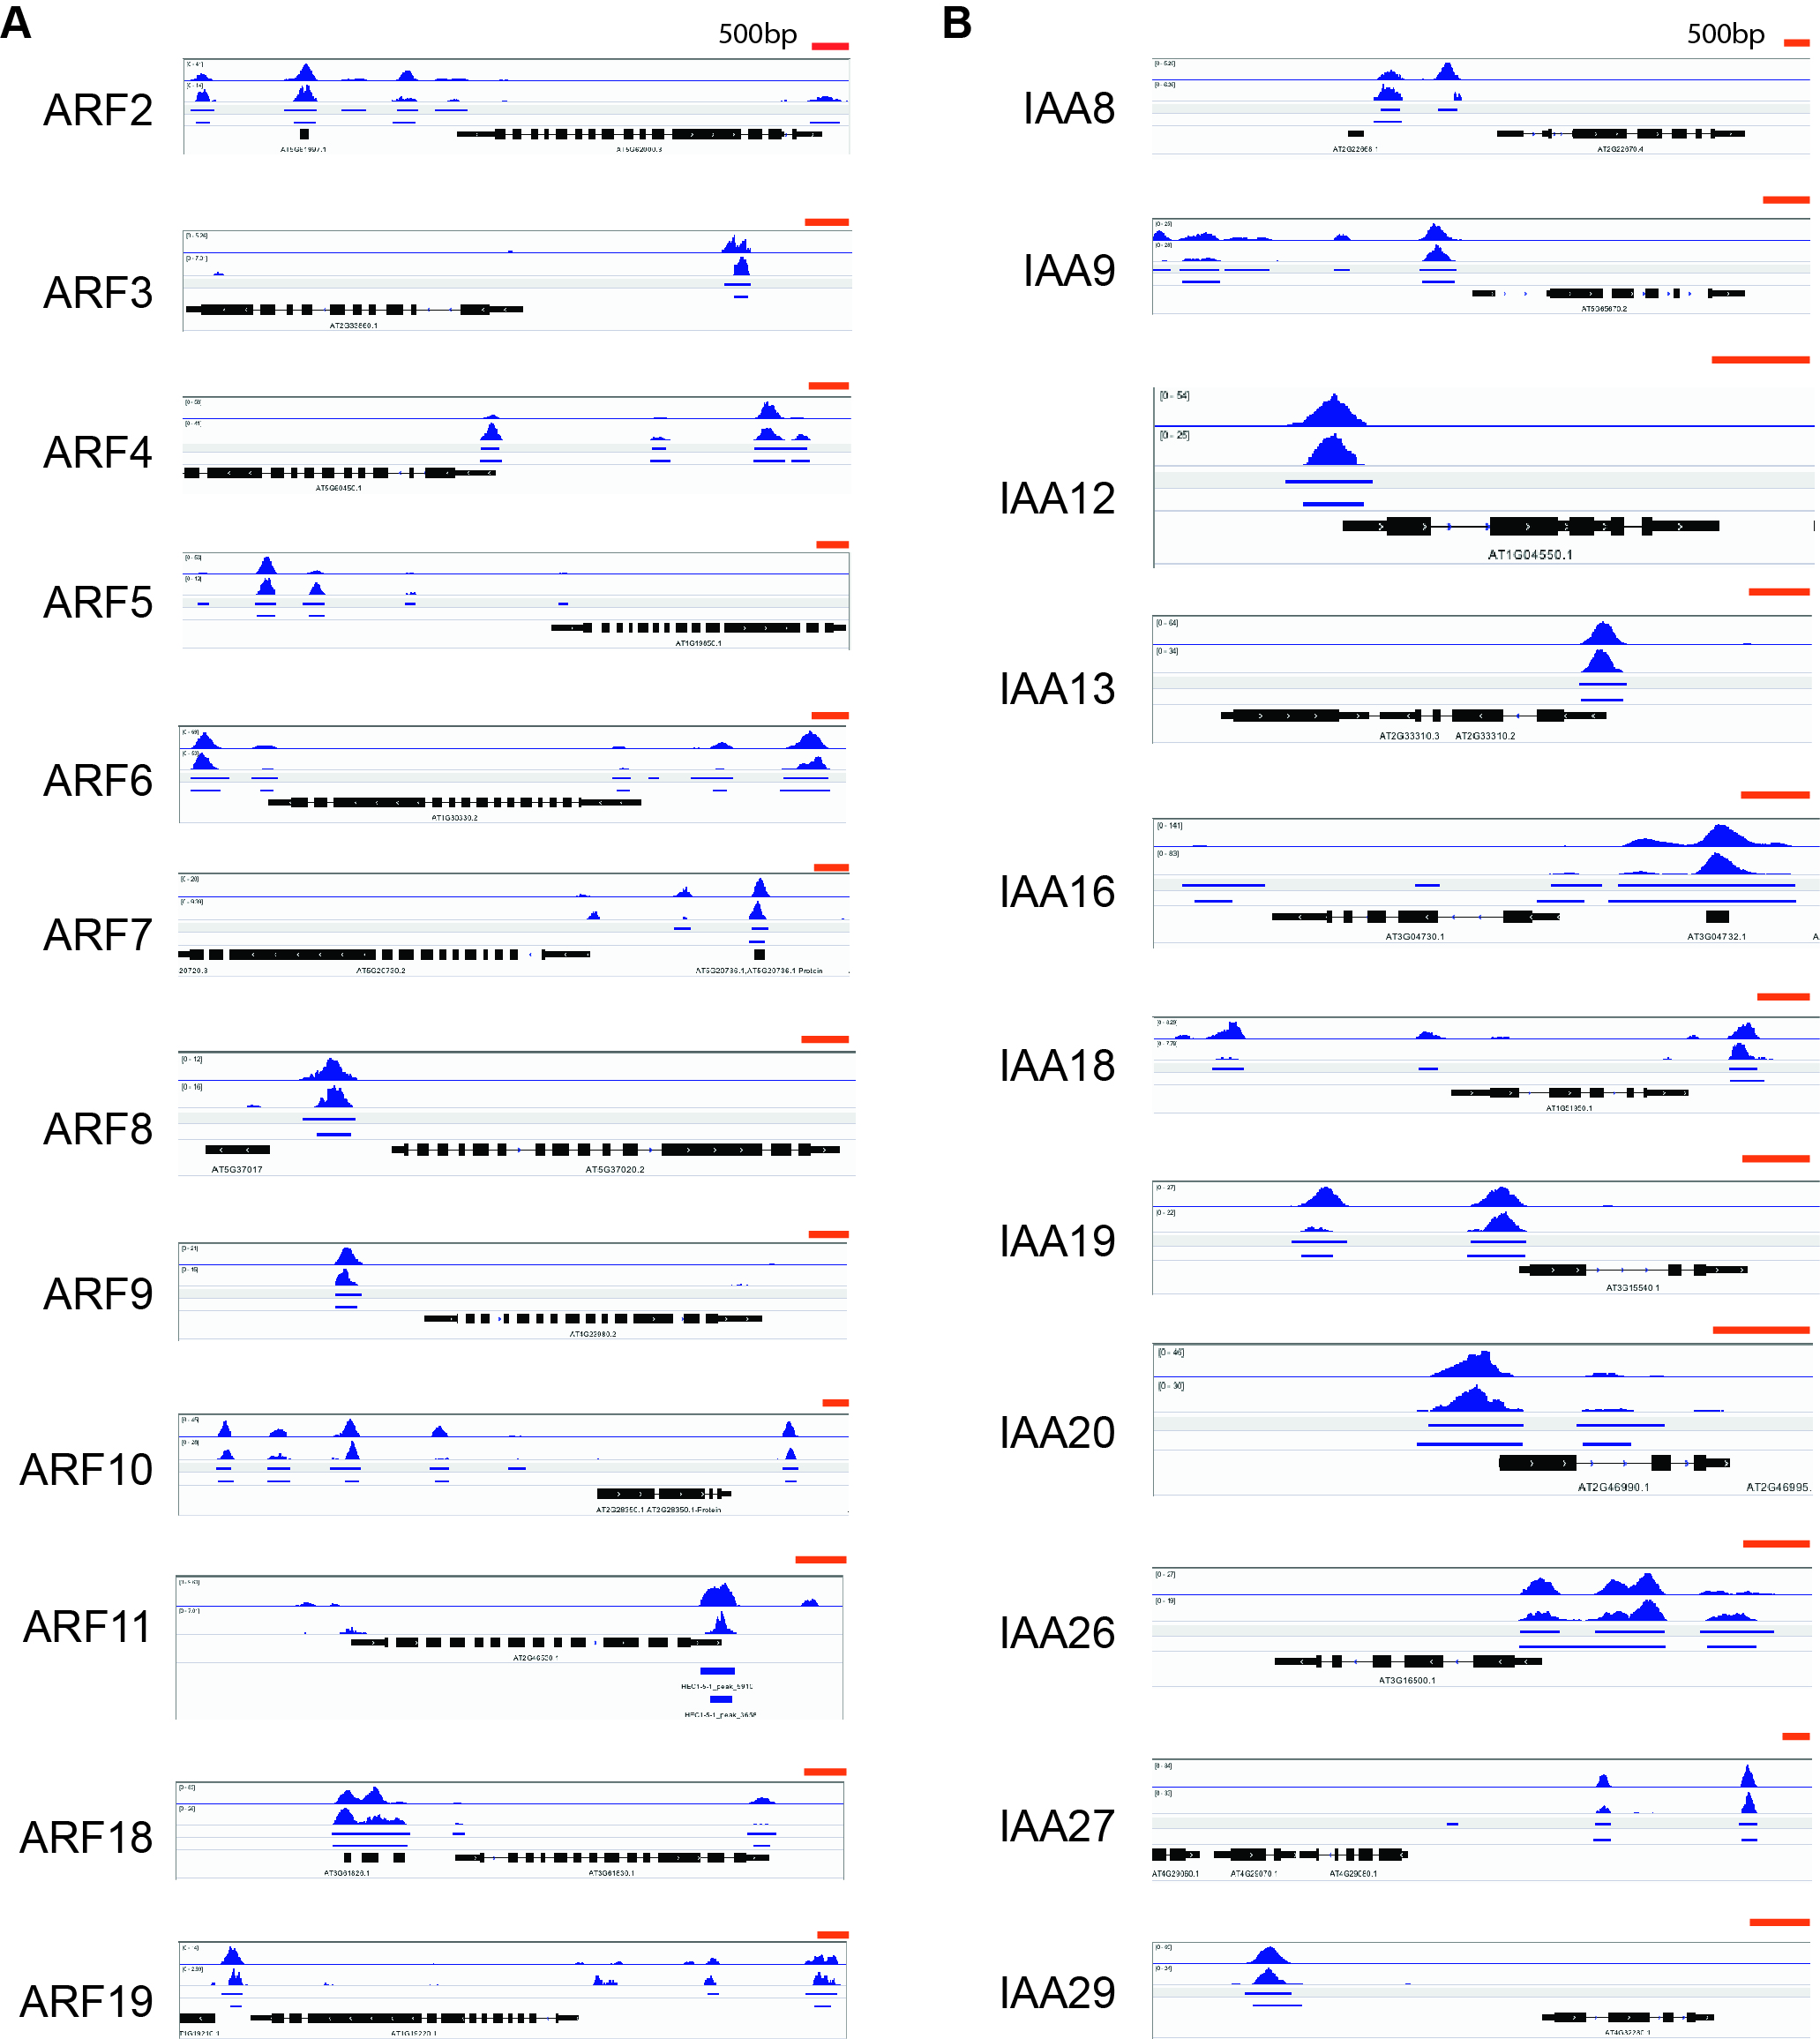

Supplement: supp [file elife-30135-supp-v1.zip › elife_poa_e30135_Figure_7_figure_supplement_2.jpg]

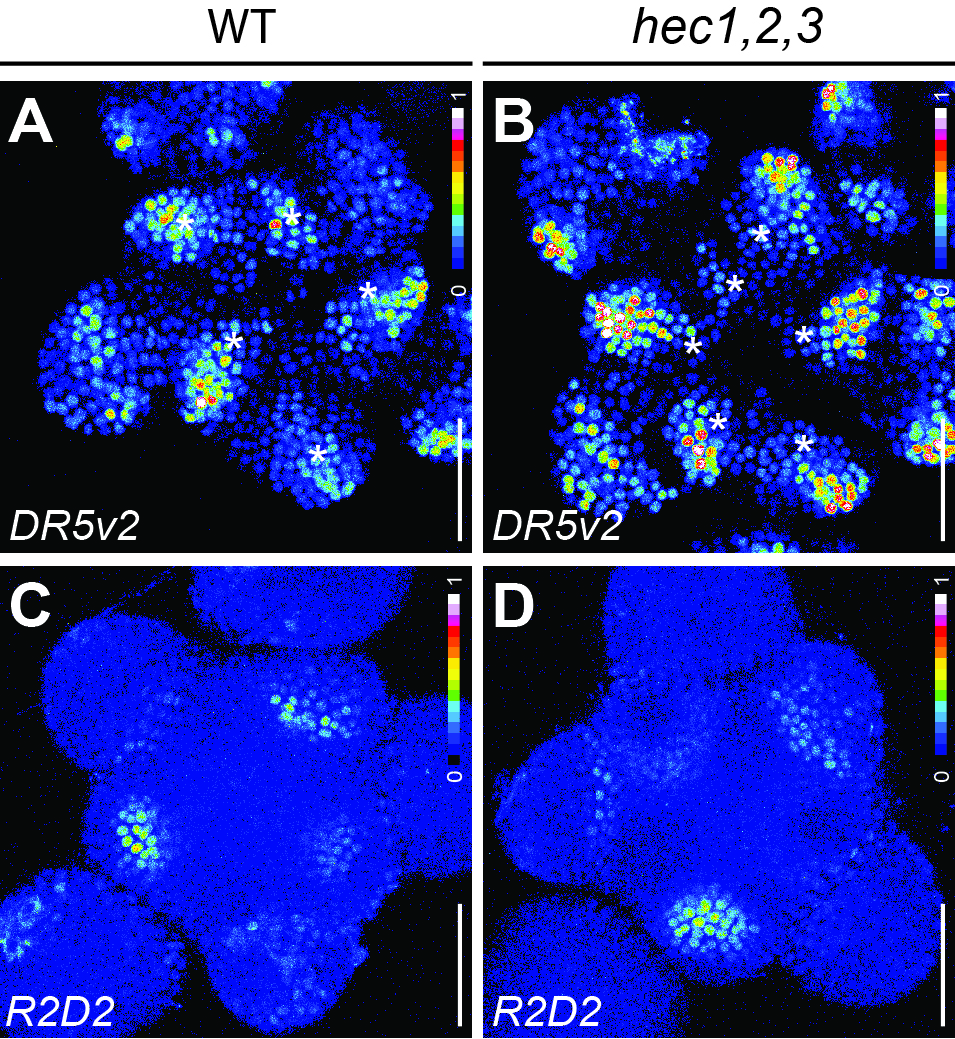

Supplement: supp [file elife-30135-supp-v1.zip › elife_poa_e30135_Figure_6_figure_supplement_1.jpg]

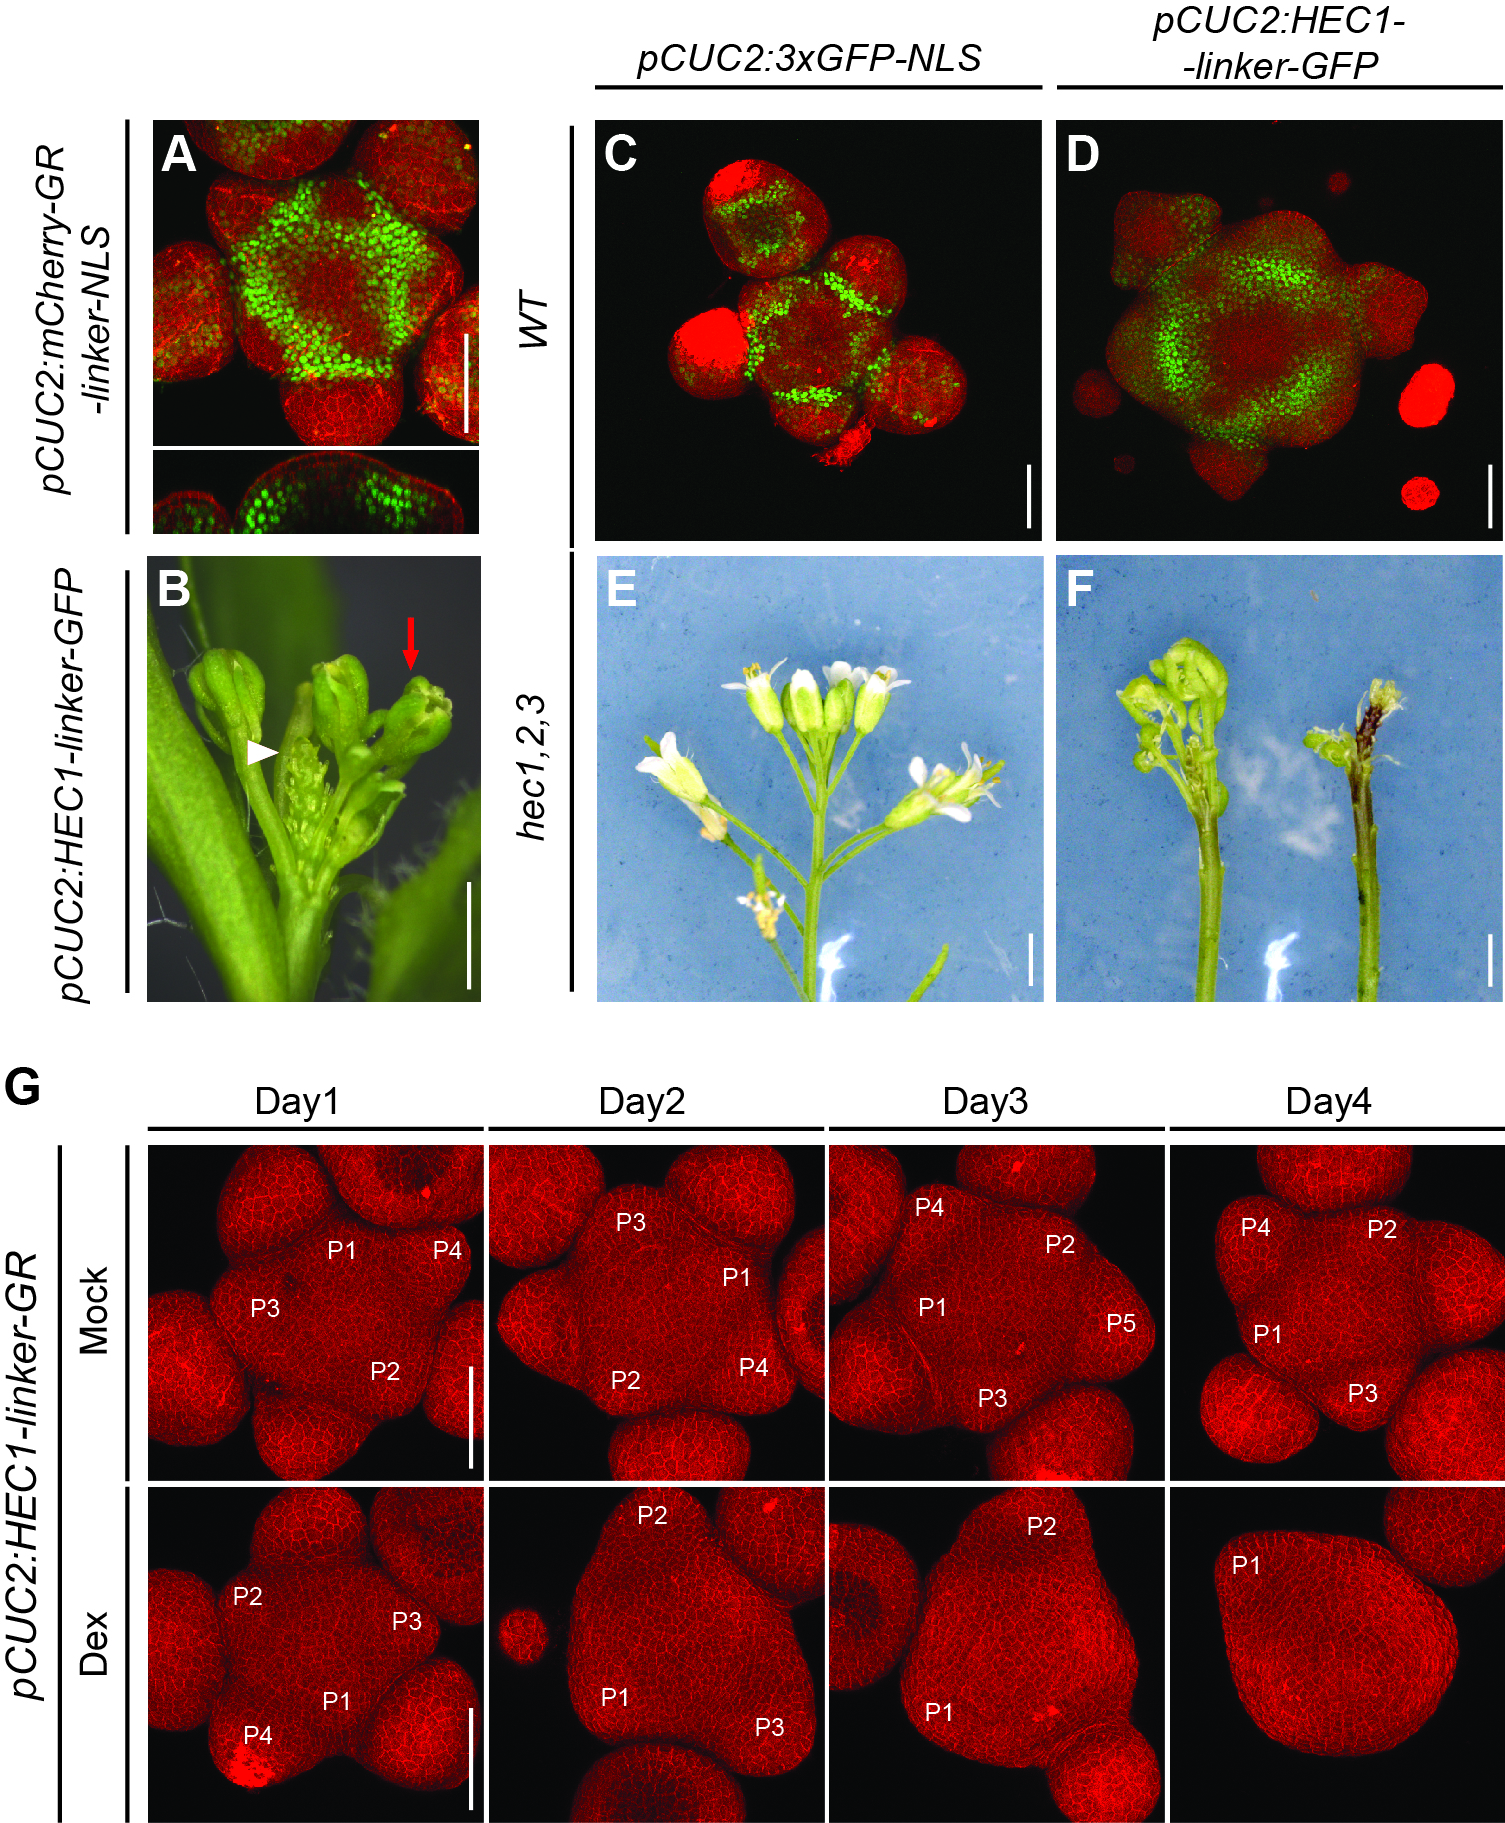

Supplement: supp [file elife-30135-supp-v1.zip › elife_poa_e30135_Figure_3_figure_supplement_1.jpg]

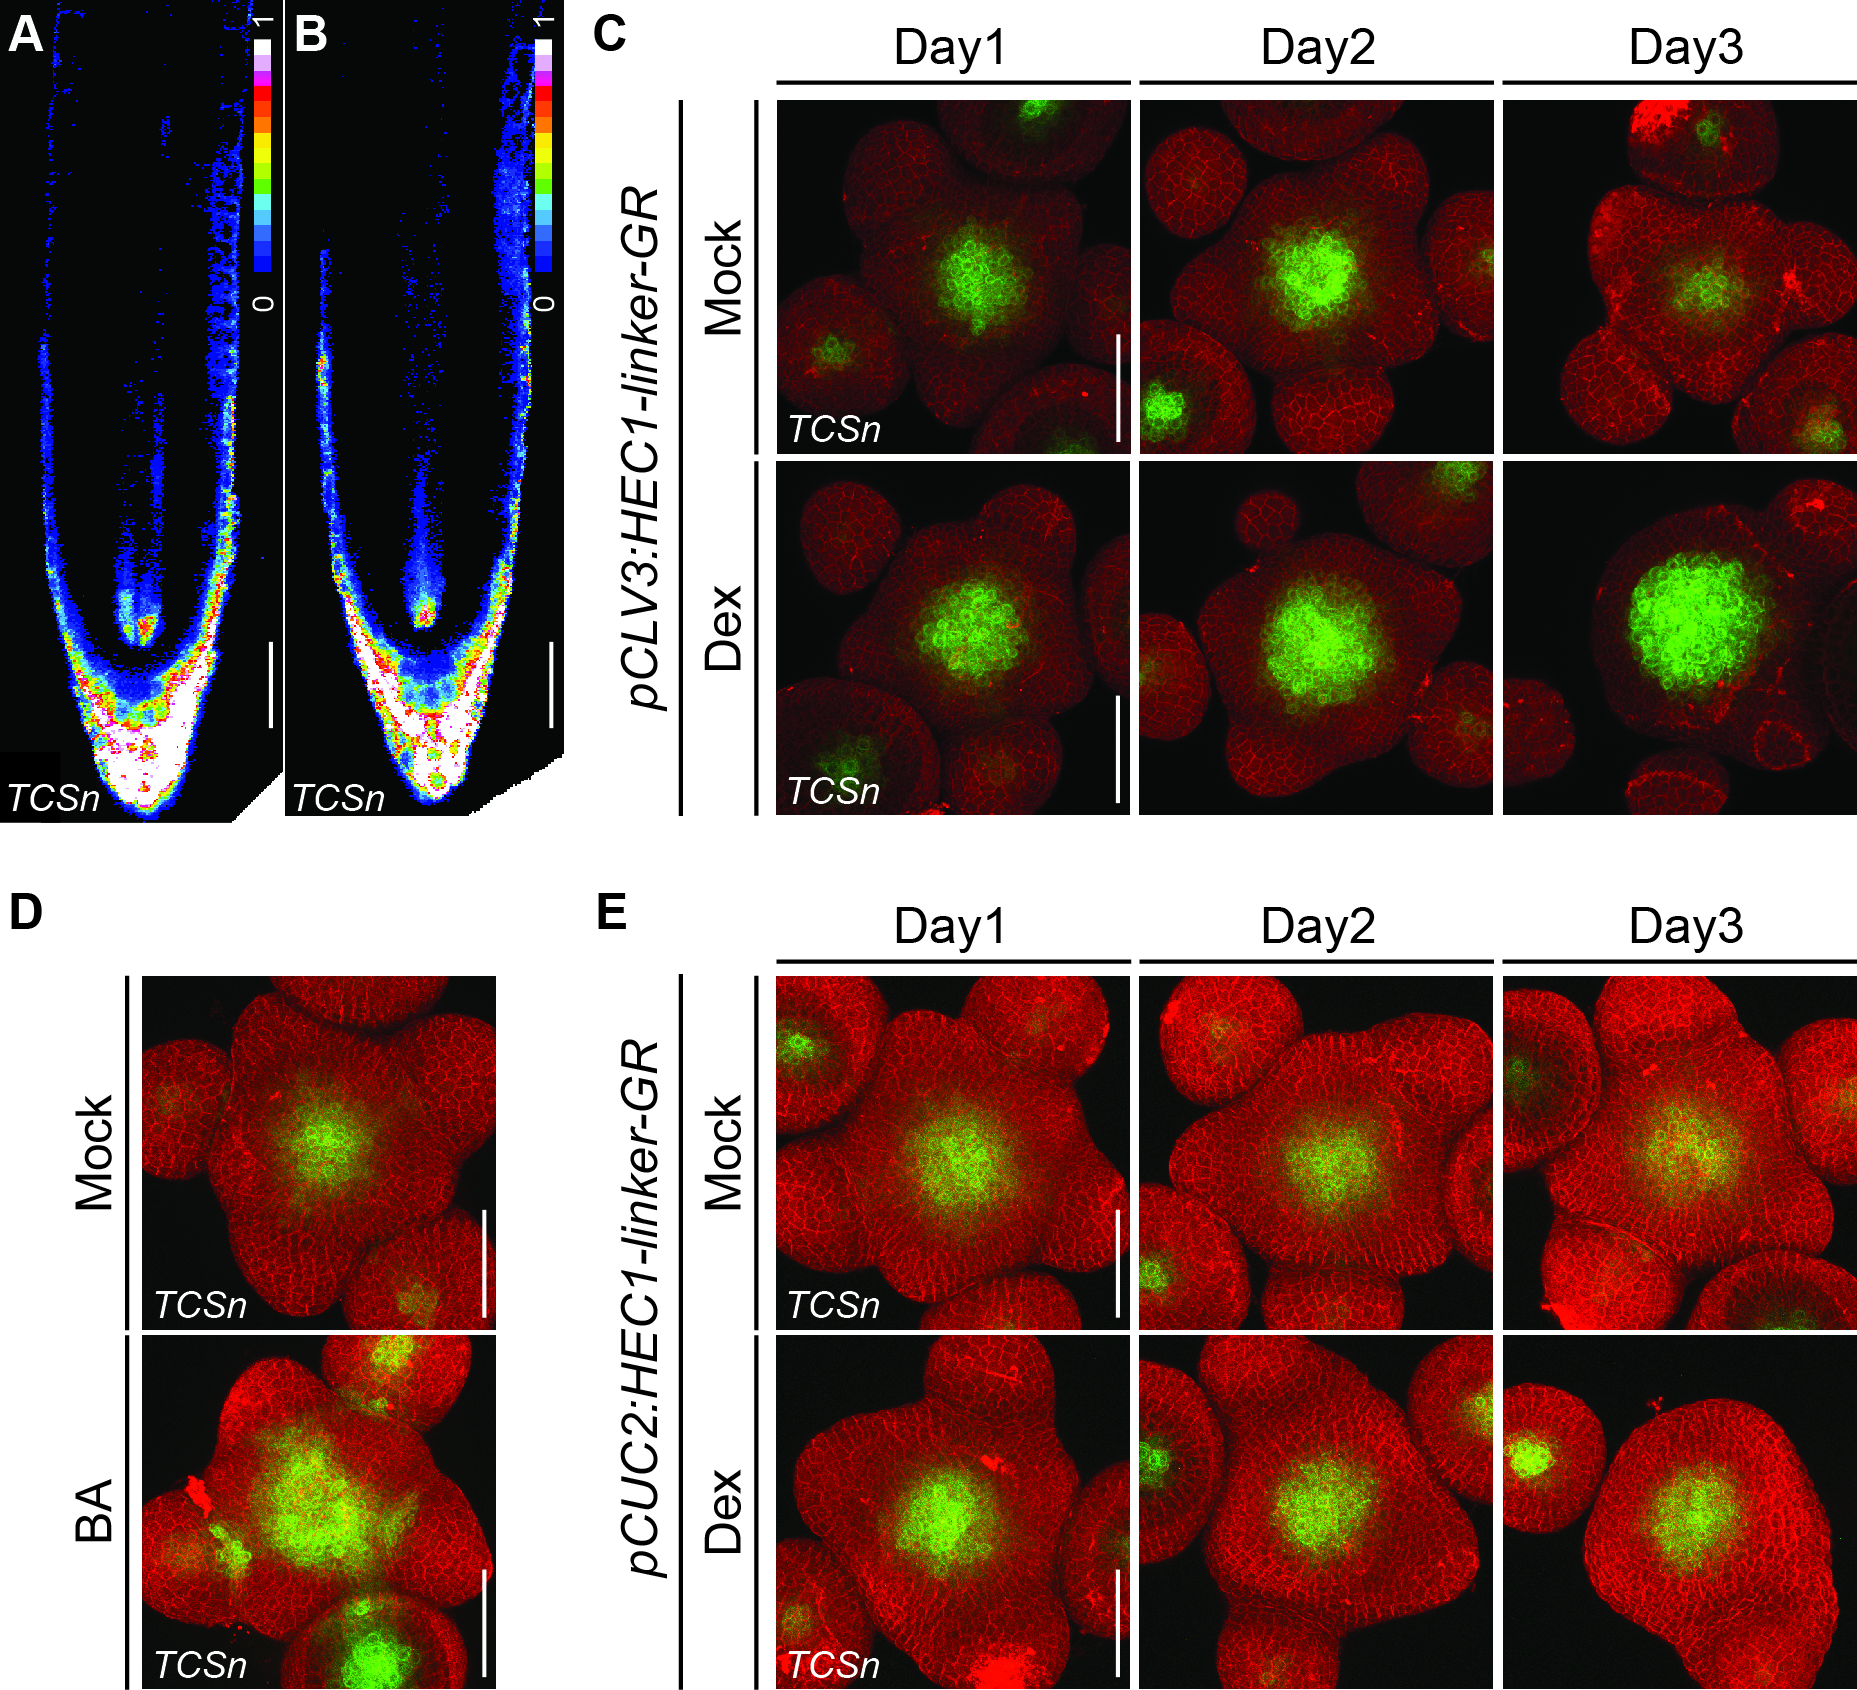

Supplement: supp [file elife-30135-supp-v1.zip › elife_poa_e30135_Figure_5_figure_supplement_1.jpg]

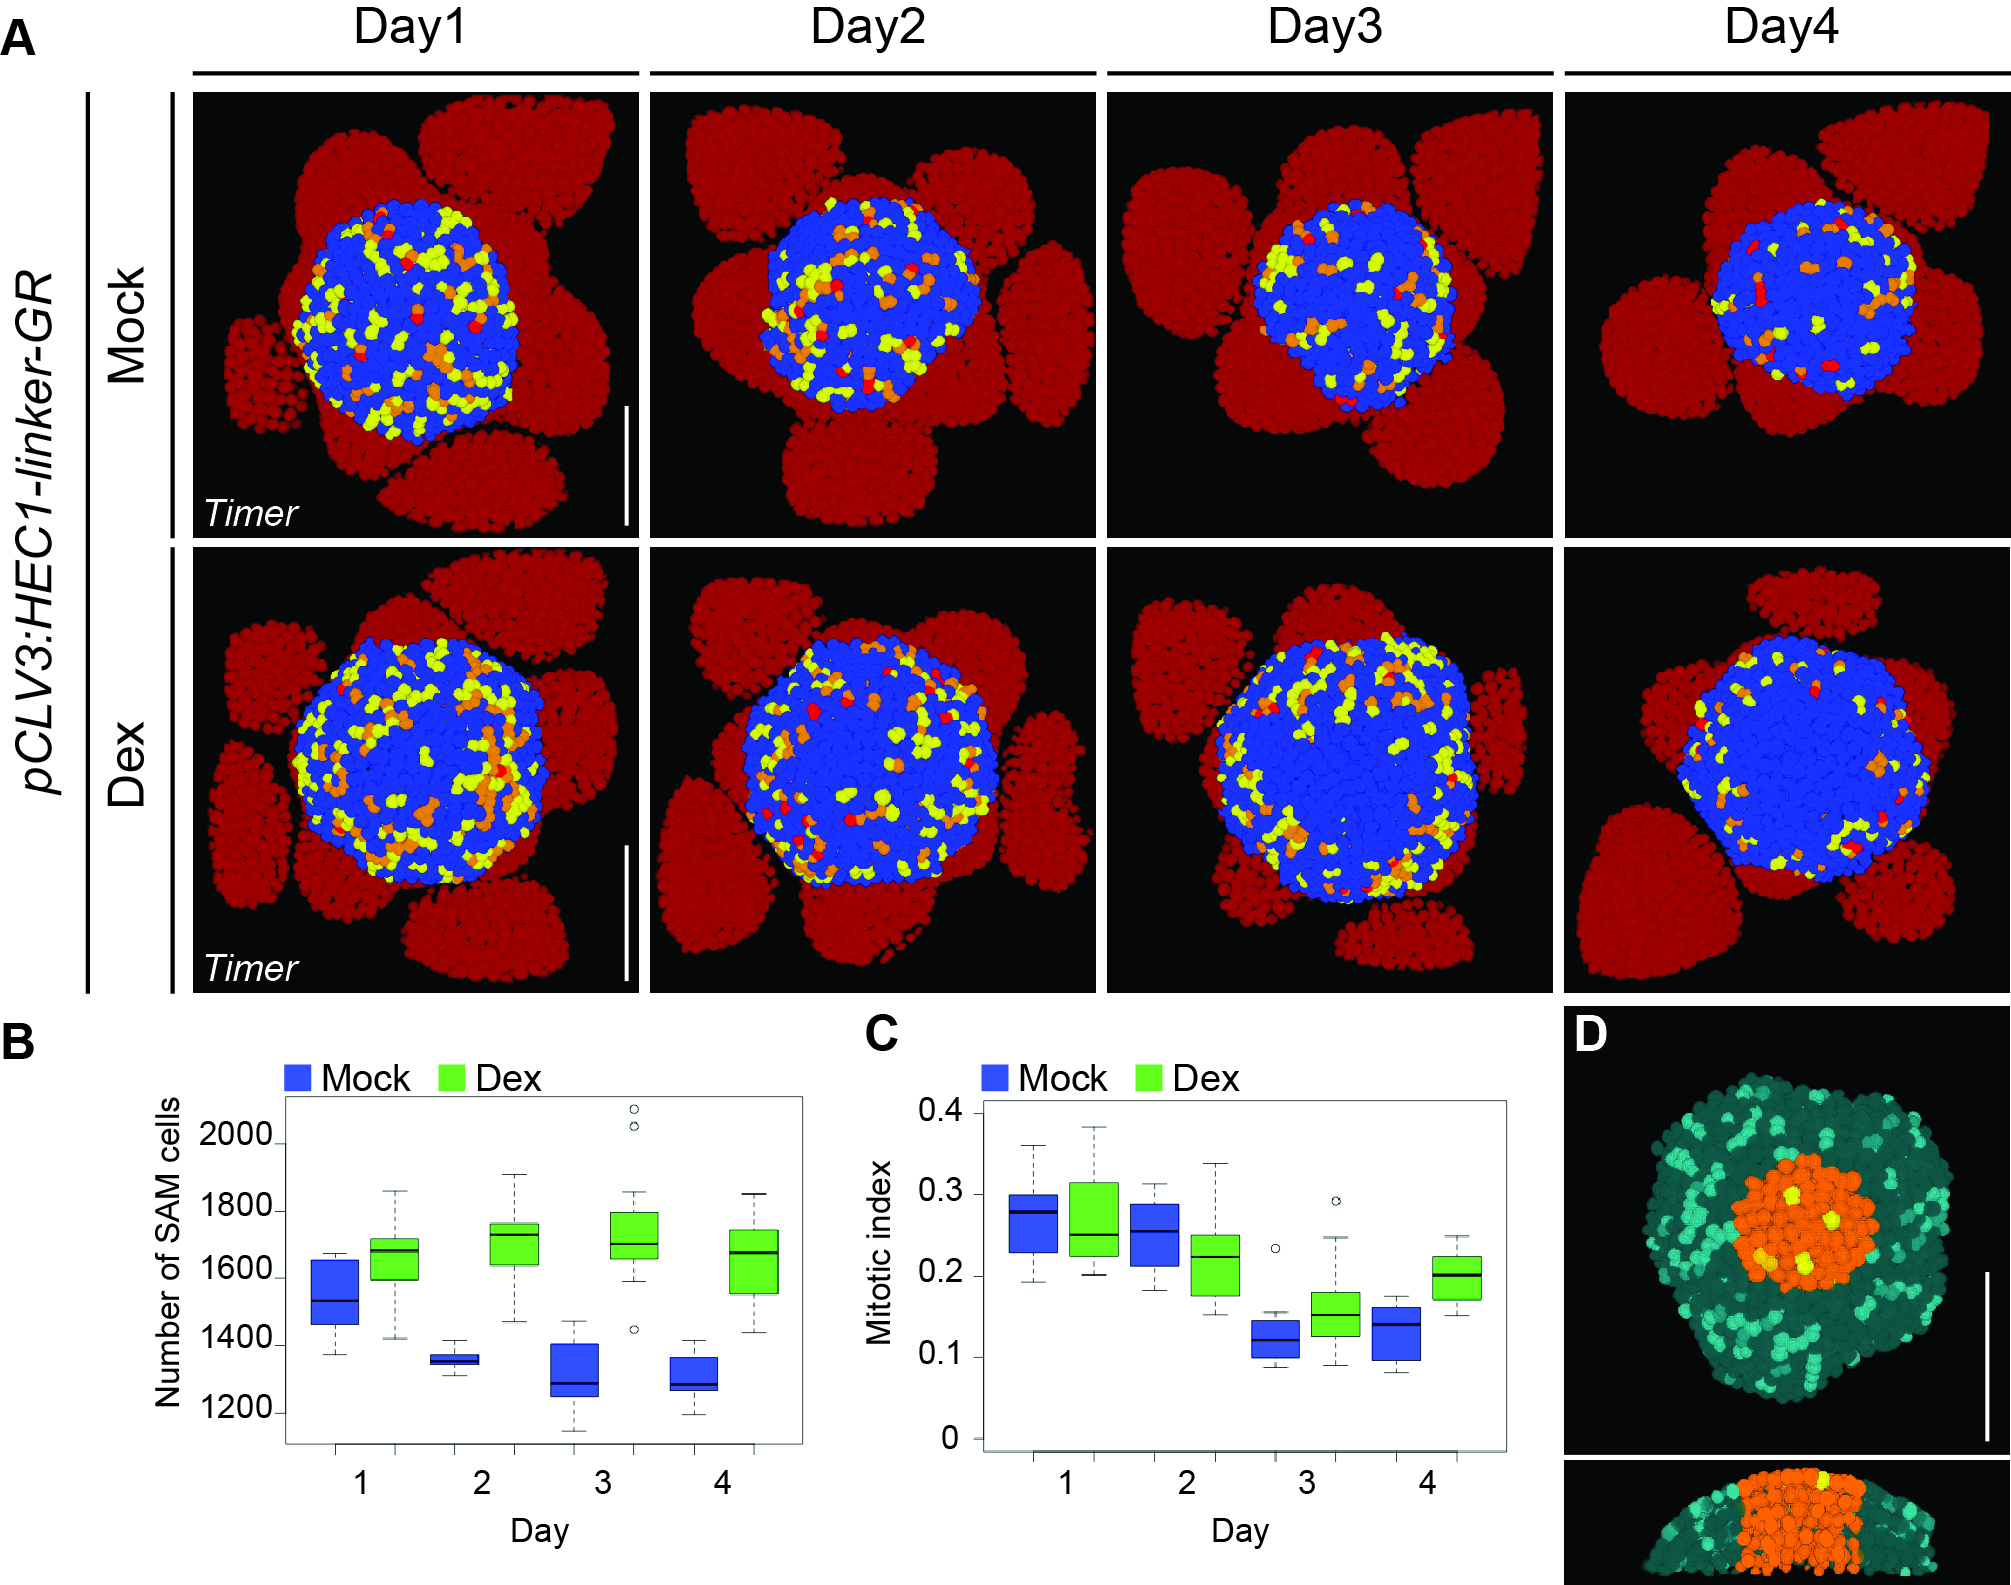

Supplement: supp [file elife-30135-supp-v1.zip › elife_poa_e30135_Figure_2_figure_supplement_6.jpg]

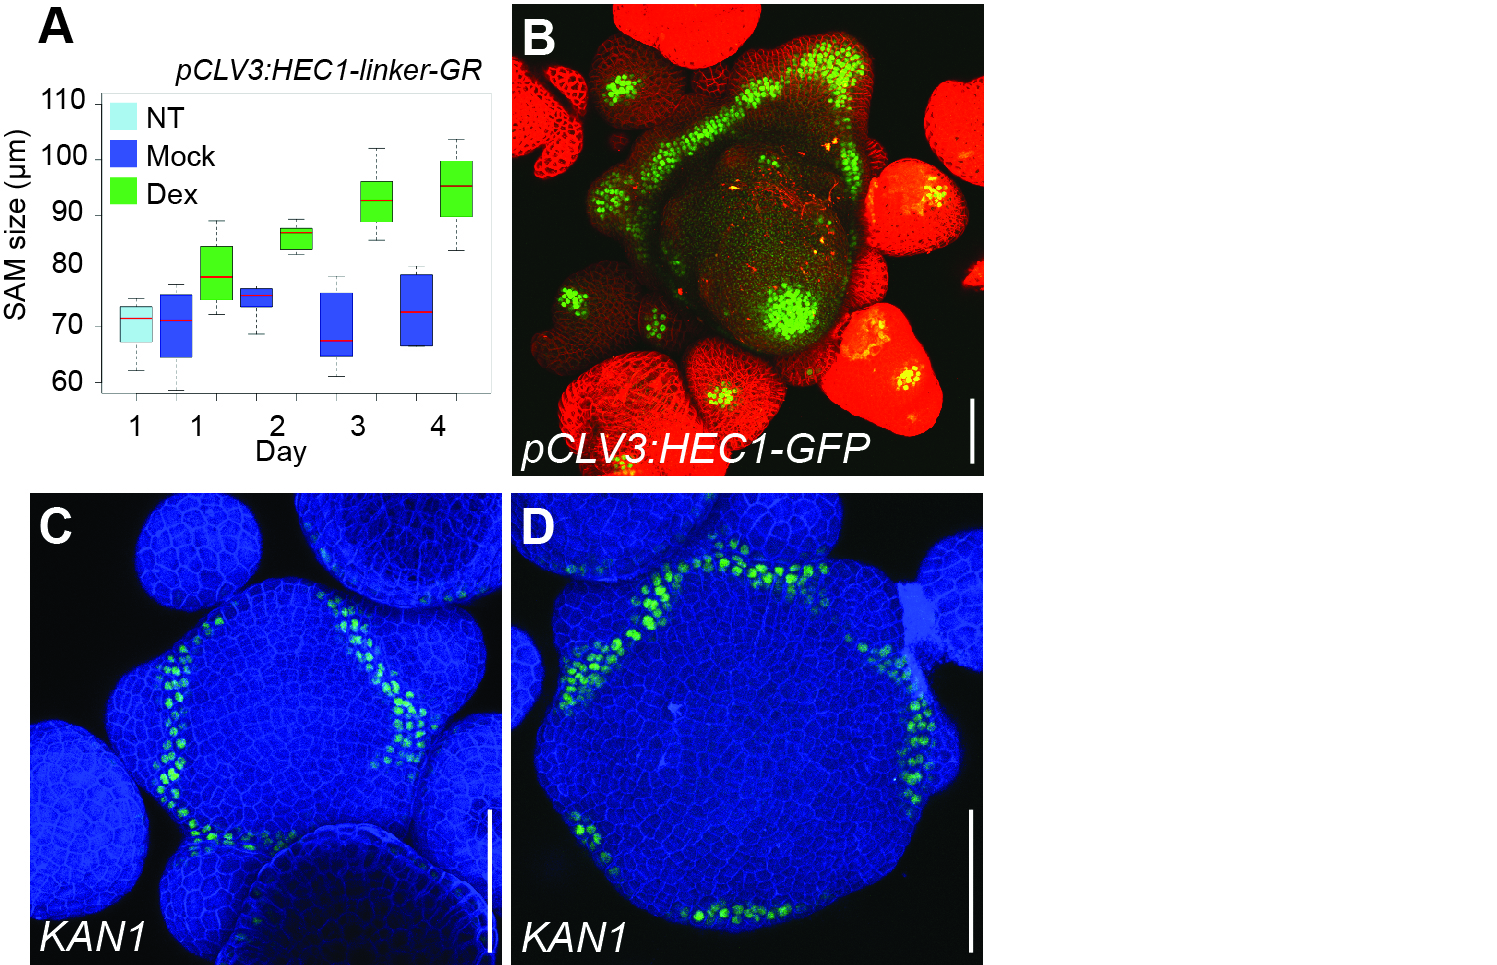

Supplement: supp [file elife-30135-supp-v1.zip › elife_poa_e30135_Figure_2_figure_supplement_2.jpg]
